# Supplementary material
Source: ML conference proceedings conference paper supplement (https://openreview.net/forum?id=Ws4v7nSqqb)
Supplement: supplementary_material [file attachment]

---

# Lifting the veil on hyper-parameters for value-based deep reinforcement learning

---

Anonymous Author(s)

Affiliation

Address

email

## Abstract

1        Successful applications of deep reinforcement learning (deep RL) combine algo-  
2        rithmic design and careful hyper-parameter selection. The former often comes  
3        from iterative improvements over existing algorithms, while the latter is either  
4        inherited from prior methods or tuned for the specific method being introduced. Al-  
5        though critical to a method’s performance, the effect of the various hyper-parameter  
6        choices are often overlooked in favour of algorithmic advances. In this paper, we  
7        perform an initial empirical investigation into a number of often-overlooked hyper-  
8        parameters for value-based deep RL agents, demonstrating their varying levels  
9        of importance. We conduct this study on a varied set of classic control environ-  
10        ments which helps highlight the effect each environment has on an algorithm’s  
11        hyper-parameter sensitivity.

## 12    1 Introduction

13        Deep reinforcement learning (deep RL) is a burgeoning research area with an astounding number  
14        of theoretical and empirical advances. Algorithmic progress is usually measured by comparing to  
15        pre-existing baselines on a set of established benchmarks, where the proposed method is typically  
16        evaluated using a single (or small set of) hyper-parameter choices. While this approach helps  
17        demonstrate the *potential* of new algorithms, they are less effective at demonstrating their *robustness*  
18        to varying hyper-parameters, especially those that have been "inherited" from prior methods. We will  
19        refer to these types of publications as *academic deep RL*.

20        There have been a number of recent success stories in applying deep RL to large-scale real-world  
21        tasks [Silver et al., 2016, Bellemare et al., 2020, Mirhoseini et al., 2021], but in all these cases  
22        very specific design decisions (including hyper-parameter choices) were necessary for them to work  
23        effectively; often, differing from the design choices made in the algorithms leveraged by these works.  
24        We will refer to these types of publications as *applied deep RL*.

25        Although tackling the same underlying problem, there exists a gap between academic and applied  
26        deep RL. While progress in the applied side leverages advances made in the academic side, it typically  
27        requires a group of highly-specialized researchers to successfully adapt the academic insights into a  
28        workable agent; this produces a *de-facto* barrier for non-academics to successfully apply deep RL to  
29        their problem. On the other hand, many of the components ultimately used for large-scale real-world  
30        problems tend to be specific, resulting in less-than-ideal academic uptake.

31        We argue that a key contributor to the gap between academic and applied deep RL is a poor empirical  
32        understanding of the impact of the aforementioned hyper-parameters on the performance of the overall  
33        algorithm. In this paper, we begin to "lift the veil" on some commonly overlooked hyper-parameters  
34        for value-based deep RL in the hope that they help bridge this gap. We aim to (at least partially)  
35        answer the following questions:

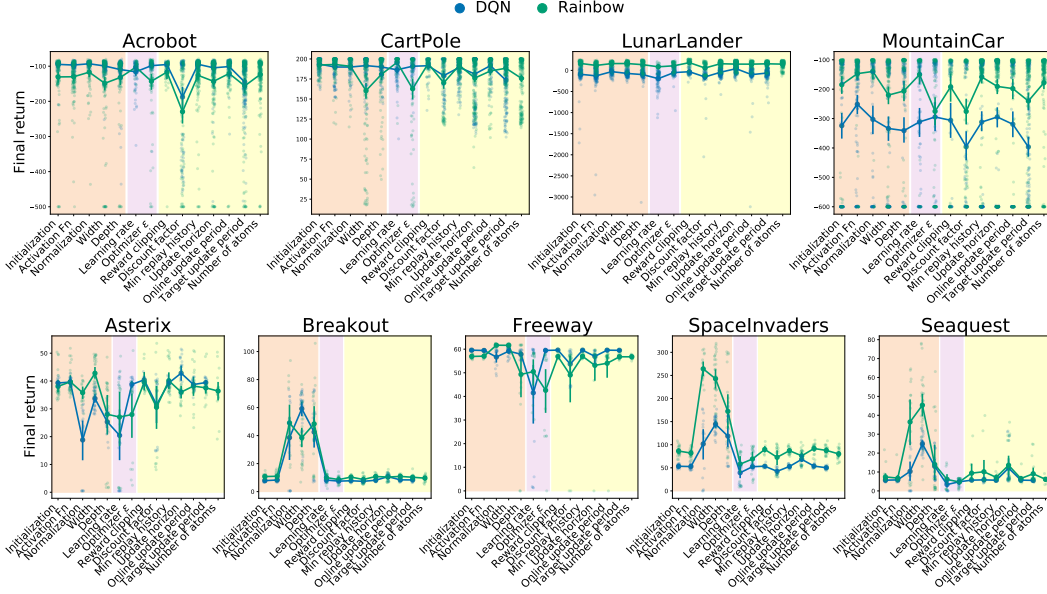

Figure 1: Comparison of hyper-parameter sensitivity for DQN and Rainbow on classic control (top) and MinAtar (bottom) environments. The colors represent groups of hyper-parameters: network components (orange, subsection 3.1), optimizer components (purple, subsection 3.2), algorithmic components (yellow, subsection 3.3). Note that the hyper-parameters considered are only those that are within a reasonable range of the default settings.

1. How sensitive are deep reinforcement learning algorithms to variations in hyper-parameter selection?
2. Does the choice of environment vary the sensitivity to hyper-parameter selection?
3. Are existing methods under-performing due to a poor hyper-parameter choice?

## 2 Background

Reinforcement learning problems are typically formulated as a Markov decision process (MDP), which consists of a 5-tuple  $\langle \mathcal{X}, \mathcal{A}, R, \mathcal{P}, \gamma \rangle$ , where  $\mathcal{X}$  denotes the (possibly infinite) state space,  $\mathcal{A}$  denotes a finite set of actions,  $R : \mathcal{X} \times \mathcal{A} \rightarrow \mathbb{R}$  is the reward function,  $\mathcal{P} : \mathcal{X} \times \mathcal{A} \rightarrow \text{Dist}(\mathcal{X})$  encodes the transition dynamics (often written as  $\mathcal{P}(x'|x, a)$ ), and  $\gamma \in [0, 1)$  is a discount factor. The principal objective of reinforcement learning is to learn a *behaviour policy*  $\pi : \mathcal{X} \rightarrow \text{Dist}(\mathcal{A})$  that maximizes the discounted sum of expected rewards. While there are a number of valid approaches (see, e.g. Sutton and Barto [1998]), in this paper we focus on *value-based* methods. These aim to learn an approximation to the so-called  $Q^*$ -values, defined via the Bellman recurrence:

$$Q^*(x, a) := R(x, a) + \gamma \mathbb{E}_{x' \sim \mathcal{P}(x, a)} [\max_{a' \in \mathcal{A}} Q^*(x', a')].$$

The optimal policy  $\pi^*$  can then be obtained from  $Q^*$  as  $\pi^*(x) := \max_{a \in \mathcal{A}} Q^*(x, a)$ .

One of the most common approaches for learning  $Q^*$  is via the method of temporal differences: given an estimate  $Q$  and a transition tuple  $(x, a, r, x')$ , we can obtain a new estimate via:  $Q(x, a) \leftarrow Q(x, a) + \alpha [r + \gamma \max_{a' \in \mathcal{A}} Q(x', a') - Q(x, a)]$ , where  $\alpha$  is a learning rate. We often refer to the term  $[r + \gamma \max_{a' \in \mathcal{A}} Q(x', a')]$  as the *Bellman target*.

### 2.1 DQN

Mnih et al. [2015] defined DQN by combining temporal-difference learning with deep networks, and demonstrated its capabilities in achieving super-human performance on the Arcade Learning Environment (ALE) [Bellemare et al., 2012]. Specifically, a deep network, parameterized by a vector  $\theta$ , was trained to approximate  $Q^*$ :  $Q_\theta \approx Q^*$ . Mnih et al. [2015] introduced two key components that helped stabilize the learning process.

61 The first was the use of a large *replay buffer* to store experienced transitions and, after collecting a  
62 sufficient number of transitions (referred to as the *min replay history*), use samples from that buffer to  
63 update the network. By having many transitions in the buffer and sampling from it one can reduce  
64 the dependency between the elements of a training batch, which helps with neural network training,  
65 in addition to leveraging speedups from hardware like GPUs. However, this results in *off-policy*  
66 learning, which means that the agent is learning from experience obtained from a different (e.g. older)  
67 policy than the policy it is currently using to act. Exploring the difficulties in off-policy learning is an  
68 active area of research; nonetheless, the use of replay buffers is ubiquitous in deep RL.

The second was the use of a *target* network (parameterized by  $\bar{\theta}$ ), in addition to the main *online* network, for stabler bootstrapping targets. The  $Q$ -update then becomes

$$\Delta Q_{\theta} = -\alpha \nabla_{\theta} \left( r_t + \gamma \max_a Q_{\bar{\theta}}(x', a') - Q_{\theta}(x, a) \right)^2$$

69 The target network parameters are not updated by gradient descent, but rather they are synchronized  
70 with the online parameters at a lower frequency (e.g.  $\bar{\theta} \leftarrow \theta$ ). We refer to the frequency of online  
71 network updates (via gradient descent) as the *online update period*, and the frequency of the target  
72 network updates as the *target update period*.

## 73 2.2 Rainbow

74 Although DQN benchmarked on the 57 ALE games with the same set of hyper-parameters, Ansel  
75 et al. [2017] and Cini et al. [2020] demonstrated that in some environments it can prove to be rather  
76 unstable resulting in degraded performance. There were a number of papers that improved on it to  
77 improve its stability and performance. Hessel et al. [2018] combined many of these into a single  
78 agent they called "Rainbow". Specifically, they combined DQN with double Q-learning [van Hasselt  
79 et al., 2016b], prioritized experience replay [Schaul et al., 2016], dueling networks [Wang et al.,  
80 2016], multi-step learning [Sutton, 1988], noisy nets [Fortunato et al., 2018], and distributional  
81 reinforcement learning [Bellemare et al., 2017].

## 82 2.3 Experimental details

83 As suggested by Obando-Ceron and Castro [2021], we evaluate on four classic control environments  
84 (CartPole, Acrobot, LunarLander, and MountainCar)<sup>1</sup>, which can be useful for conducting thorough  
85 investigations with numerous independent runs. Our implementation is based on the Dopamine frame-  
86 work [Castro et al., 2018], but the default hyper-parameter settings used for the online experiments  
87 are those specified by Obando-Ceron and Castro [2021]. All experiments were run on a CPU, and we  
88 report the mean and 95% confidence intervals, averaged over 30 independent seeds.

89 We also evaluated on the MinAtar environment [Young and Tian, 2019], as they can help shed  
90 some light into the effect of convolutional layers and more complex environments. For the MinAtar  
91 experiments we use the default settings suggested by Obando-Ceron and Castro [2021], except  
92 where noted. Given the increased computational complexity of this suite, we ran each setting with 5  
93 independent seeds (each on a separate GPU), and we report the mean 75% confidence intervals.

## 94 3 Lifting the veil

95 We organize our experiments into three groups of hyper-parameters: *network components* (sub-  
96 section 3.1), *optimization hyper-parameters* (subsection 3.2), and *algorithmic parameters* (subsec-  
97 tion 3.3). Figure 1 presents an overall summary of these experiments, and we will present and discuss  
98 each individual group below. Due to space constraints we include all the figures in Appendix A and  
99 include only aggregate plots in the main paper.

### 100 3.1 Network components

101 The aggregate results for these experiments are summarized in Figure 2.

<sup>1</sup>Available in the OpenAI Gym library [Brockman et al., 2016]

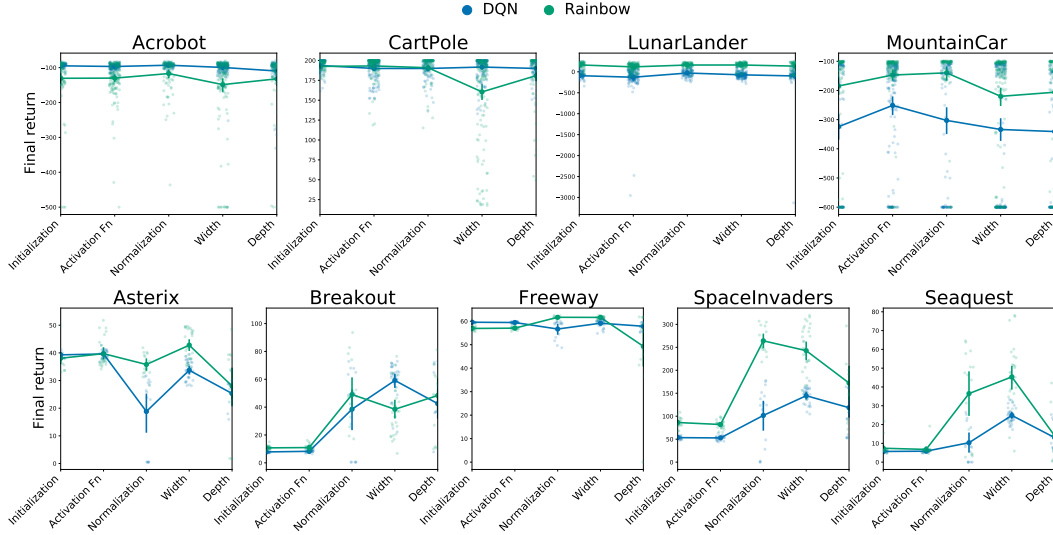

Figure 2: Comparison of hyper-parameter sensitivity for DQN and Rainbow, for the network component hyper-parameters (subsection 3.1).

102 **Initializations** Initialization is the term used to define the initial values for the parameters of a  
 103 neural network. While there exists a broad literature studying initialization strategies for neural  
 104 networks [Glorot and Bengio, 2010, He et al., 2015, Saxe et al., 2014]. With a few exceptions, these  
 105 strategies have not been studied in detail in deep reinforcement learning [Andrychowicz et al., 2020,  
 106 Hussenot et al., 2021, Paine et al., 2020].

107 In Figure 5 and Figure 6 we can observe that, for the most part, there is little difference when varying  
 108 the initialization scheme. This is somewhat expected due to RL’s “self-correcting nature”; that is, it is  
 109 not optimizing towards a fixed target, but rather a shifting one (as a consequence of bootstrapping).  
 110 There are two notable exceptions worth mentioning:

111 (1) All-zeros and all-ones initialization almost always fails to learn with DQN. This is most likely due  
 112 to zero gradients occurring as a consequence of the combination of constant predictions with little  
 113 reward variability. In Rainbow this issue is not present, perhaps due to the presence of noisy networks  
 114 (which break the constancy of predictions). (2) DQN on MountainCar seems to be rather sensitive to  
 115 the choice of initialization. This is likely due to the properties of this particular environment, which  
 116 we discuss below.

117 In Figure 7 we can see that we have the same level of stability in the MinAtar environments.

118 **Activation functions** Non-linear activation functions are a fundamental part of Deep Neural Net-  
 119 works, as their removal effectively turns the network into a linear function approximator. Many  
 120 different activation functions have been proposed for different settings ([Devlin et al., 2019, Elfving  
 121 et al., 2018, Dauphin et al., 2017]), yet it’s rare to see comparisons between the many possible options  
 122 [Shamir et al., 2020] and, to the best of our knowledge, there are no previous examples of doing such  
 123 comparison in the Reinforcement Learning setting.

124 In Figure 8 (and in Figure 10 for MinAtar environments) we can see that there is little difference  
 125 across the top activation functions, with DQN on MountainCar once again being a notable exception.  
 126 However, in Figure 9 we can see that there is a fair bit of variability across the 16 possible activation  
 127 functions. Of note is how sensitive Rainbow seems to be to these on CartPole, which is arguably the  
 128 simplest of all the environments. A more detailed investigation of the effect (and interaction with  
 129 other components) of activation functions is an interesting avenue for future work.

130 **Normalization** Normalization plays an important role in various deep learning applications, and  
 131 it is well established in supervised learning [Tan and Le, 2020, Xie et al., 2017]. Surprisingly, the  
 132 use of normalization is fairly rare in deep reinforcement learning, with a few exceptions [Bhatt  
 133 et al., 2019, Arpit et al., 2019, Lillicrap et al., 2019, Silver et al., 2017]. We explore two types of

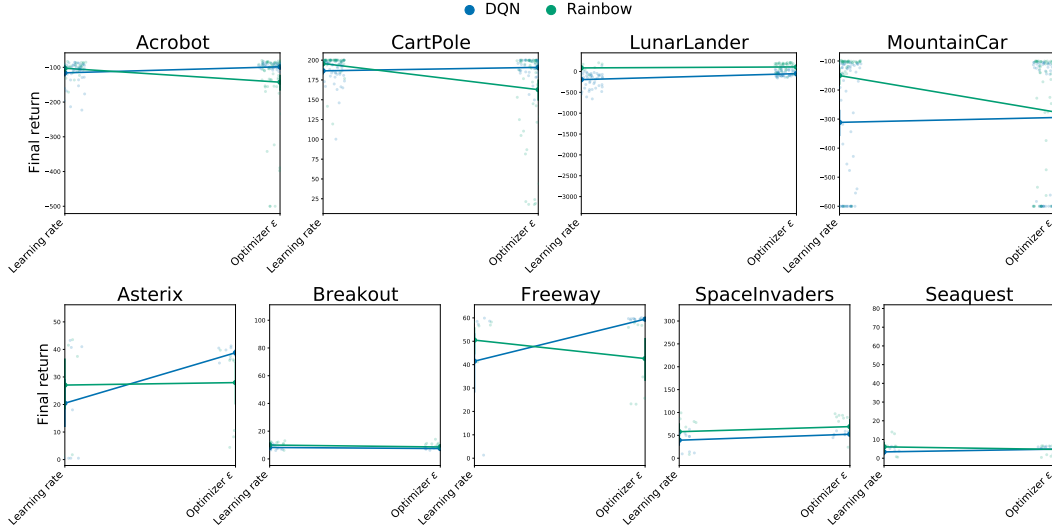

Figure 3: Comparison of hyper-parameter sensitivity for DQN and Rainbow, for the optimizer hyper-parameters (subsection 3.2).

134 normalization: **batch normalization** [Ioffe and Szegedy, 2015] and **layer normalization** [Ba et al.,  
 135 2016]. In Figure 11 we can see that although there are some minor differences, there appears to  
 136 be little gain to using normalization. This may very well be a consequence of the simplicity of the  
 137 environments (indeed, the biggest differences are observed in MountainCar) and the shallowness of  
 138 the networks we’re using. Although batch normalization does not seem to provide clear benefits, it  
 139 also does not seem to hurt (with the exception of MountainCar), a finding that is somewhat at odds  
 140 with that of Salimans and Kingma [2016], who affirm that batch normalization is not well suited for  
 141 Deep Reinforcement Learning.

142 We investigated this further on the MinAtar suite in Figure 12. It is worth noting that since the default  
 143 setting for MinAtar is to use a single convolutional layer with no dense layers, we added one dense  
 144 layer (based on the depth results from Figure 14) and applied the normalization on this extra dense  
 145 layer. The results provide even more evidence that there is little gain to using normalization, and  
 146 this can in fact hurt performance. It is worth investigating whether applying normalization to the  
 147 convolutional layer can help address this.

148 **Network capacity** Improvements in deep learning architectures have played a vital role in moving  
 149 forward the state of supervised and unsupervised learning in computer vision, but neural network  
 150 architecture design for deep reinforcement learning is relatively unexplored, with a few exceptions  
 151 [Sinha et al., 2020, Andrychowicz et al., 2020].

152 We vary network capacity via the **depth** (e.g. the number of hidden layers) and the **width** (e.g. the  
 153 number of neurons) of each hidden layer. In Figure 13 we observe an interesting phenomenon where  
 154 fewer layers seems to help DQN (e.g. MountainCar) whereas in Rainbow performance is correlated  
 155 with the number of layers. We hypothesize that this form of network capacity has a non-trivial  
 156 interaction with the type of loss (e.g. expectational versus distributional), and may help further  
 157 understand the difference between the two forms of TD-learning [Lyle et al., 2019]. Huh et al. [2021]  
 158 and Kumar et al. [2020] demonstrated that deeper networks tend to be biased towards lower rank  
 159 (e.g. simpler) solutions. This may help explain why in DQN, shallower networks work best with  
 160 Mountaincar (the most complex off the four classic control environments).

161 In Figure 14 we investigate the effect of depth on the MinAtar suite. The default setting for MinAtar  
 162 is to use a single convolutional layer (depth = 0), so we investigated the effect of adding dense layers  
 163 after the convolutional layer. In DQN there is a clear benefit to adding more layers, but the best  
 164 results are obtained when adding only a single layer. It is interesting to note that in Freeway, the  
 165 simplest of the five games, the best performance is obtained without any extra layers. This strongly  
 166 suggests that there is a close relationship between network depth and environment complexity, where

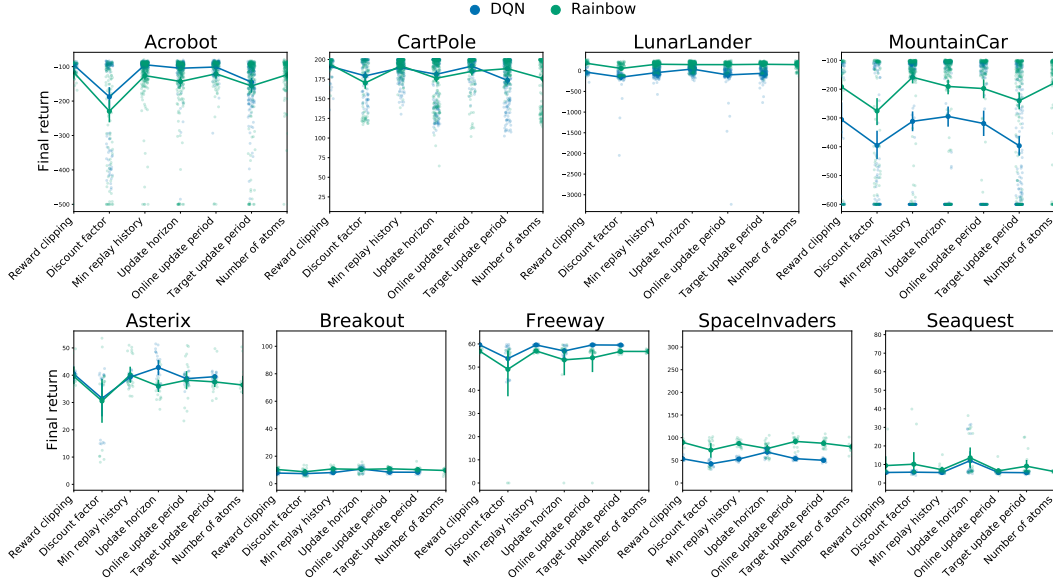

Figure 4: Comparison of hyper-parameter sensitivity for DQN and Rainbow, for the algorithmic hyper-parameters (subsection 3.1).

the best performance is obtained in a “goldilocks region”, and this region varies across environments. In Rainbow, we can further observe how much this “goldilocks region” varies from game to game: from a wide region (Asterix) to a very narrow one (Seaquest).

In Figure 15 we can see that, in general, increasing width improves performance. It is somewhat surprising the significant differences observed with Rainbow in CartPole (arguably the easiest of the environments), yet there is no noticeable difference in DQN.

Given the results of the depth experiments, we explored varying width in the MinAtar environments by adding one dense layer after the convolutional layer. In Figure 16 we see surprising variation across environments where performance is sometimes proportional to width (SpaceInvaders), and sometimes inversely proportional (Asterix and Freeway).

### 3.2 Optimizer hyper-parameters

Although the choice of optimizer is a design choice in itself, Obando-Ceron and Castro [2021] demonstrated the superior performance of the Adam optimizer [Kingma and Ba, 2015] relative to candidates such as RMSProp. We explore two hyper-parameters of this optimizer: **learning rate** and **epsilon** values. The aggregate results for these hyper-parameters are summarized in Figure 3.

In Figure 17 we can see that both algorithms are relatively robust to varying learning rates between  $10^{-4}$  and 0.01; however in Figure 18 we explore a wider range and observe a deterioration in performance in both algorithms. In Figure 19 we can see a fair bit of variation across the MinAtar environments for the learning rates considered, with the ordering based on performance varying between environments (e.g. Asterix versus Breakout on DQN).

We also observe that DQN seems to exhibit greater stability with larger  $\epsilon$  values than Rainbow (see Figure 20 and Figure 21). To further investigate this observation, we ran the  $\epsilon$  experiment on the MinAtar suite (Figure 22). We observe that the qualitative differences between DQN and Rainbow are mostly gone, suggesting that the observations in the classic control environment are perhaps due more to Rainbow’s stability on simpler environments.

### 3.3 Algorithmic parameters

There are a number of algorithmic design choices for RL agents that are often overlooked, but can play a significant role in performance. Hessel et al. [2019] explored this to some extent, focusing

on variants of the A2C algorithm [Mnih et al., 2016]. The aggregate results for this group of hyper-parameters is presented in Figure 4.

**Reward clipping** Reward clipping was an important design decision for the original DQN algorithm, as it enabled normalizing scores across games [Mnih et al., 2015]. Clipping rewards changes the objective, which can result in qualitatively different learned behaviours. This design decision has often been adopted by derivative algorithms for other domains without properly evaluating its efficacy. Indeed, Figure 23 suggests that the agents can actually perform better without reward clipping. This is somewhat at odds with the findings of van Hasselt et al. [2016a], where they found reward-clipping to be useful for learning. In the MinAtar environments we do not see much difference between the two (Figure 24).

**Discount factor** The importance of  $\gamma$  has been observed in a number of recent works [Amit et al., 2020, Hessel et al., 2019, Gelada and Bellemare, 2019, van Seijen et al., 2019, François-Lavet et al., 2016], and in particular the discrepancy between the  $\gamma$  value used for *training* and the one used for *evaluation*. As Figures 25 and 26 demonstrate, algorithmic performance is rather sensitive to the choice of  $\gamma$ ; a result consistent with the findings of Hessel et al. [2019].

In Figure 27 we evaluate three values of  $\gamma$  on the MinAtar environments and see a fair bit of variability across environments (compare DQN on SpaceInvaders versus Seaquest, for instance).

**Minimum replay history** As mentioned above, the agent stores its experience in a replay memory, from which it then samples mini-batches for learning. It is common practice to only begin sampling from the replay buffer when a minimum number of transitions have been recorded: the minimum replay history. The purpose of this parameter is to avoid overfitting to a sample set of samples at the early stages of training. Perhaps, surprisingly, Figure 28 and Figure 29 suggest that the choice of this parameter has very little effect on the performance of either algorithm.

**Update horizon** Multi-step learning [Sutton, 1988] computes the temporal difference error using multi-step transition, instead of a single step. DQN uses a single-step update by default, whereas Rainbow chose a 3-step update. In Figure 30 we compare various update horizons. It is interesting to note that DQN is mostly unaffected by the update horizon, whereas Rainbow seems to have degraded performance with a single-step update horizon. It thus seems that one of the Rainbow components benefits from the multi-step update, an interesting question left for future work.

The update horizon has been argued to trade-off between the bias and the variance of the return estimate [Kearns and Singh, 2000]. This effect has been observed in the linear function approximation case, but it has not been very well studied with deep networks. Hernandez-Garcia and Sutton [2019] perform a statistical analysis on the effect the update horizon has on the performance of six reinforcement algorithms in MountainCar and find that the performance of each algorithm at the beginning of training was better with larger update horizons. These findings are confirmed by our results on MountainCar (Figure 30), but they are less evident on the other environments. Indeed, DQN seems to perform *worse* with a larger update horizon on Acrobot. These findings further highlight the sensitivity of the different DRL components relative to the environment on which they are run.

In Figure 31 we see this effect in high relief, where the benefit of the update horizon seems to be closely tied with environmental complexity. Compare, for instance, both algorithms on Freeway and Seaquest: in the former, an update horizon of 1 performs best, while in the latter an update horizon of 10 yields a *dramatic* improvement for both algorithms.

**Update periods** For synchronous agents (like DQN and Rainbow), the update of the online network parameters is not done after every step taken in the environment; instead, it is performed at a frequency specified by the *update period*. The default value used is 4, which means that the online network parameters are only updated after every 4 steps taken in the environment.

The effect of varying the update period for the online network can be seen in Figure 32. The results vary from environment to environment (compare the performance of an update period equal to 8 in Acrobot and MountainCar with DQN); this variability is likely due to the complex learning dynamics of RL and merits further study. Interestingly, this parameter does not seem to have much of an effect on the MinAtar environments (Figure 31).

As mentioned previously, the target network parameters are updated less frequently than the online parameters. It has been observed that less frequent updates can result in improvements [Hernandez-Garcia and Sutton, 2019]. However, our findings in Figure 34 suggest that the best performance is obtained between values of 50-200, but any higher or lower results in decreased performance. We also find that DQN seems to be more sensitive to this choice than Rainbow in the classic control environments, but there is little variation for both DQN and Rainbow in the MinAtar environments (Figure 35).

**Number of atoms** One of the key components of the Rainbow algorithm is distributional reinforcement learning. With this approach, the output layer predicts the distribution of the returns for each action  $a$  in a state  $s$ , instead of the mean  $Q^\pi(s, a)$ . Rainbow uses the distribution parameterization originally proposed by Bellemare et al. [2017]; namely, representing the return distribution as a categorical distribution parameterized by  $N$  "atoms". Bellemare et al. [2017] found that empirically setting  $N = 51$  proved best for the ALE; in Figure 36 we revisit this design choice.

Somewhat surprisingly, we observe little sensitivity to this choice in the four environments considered. Obando-Ceron and Castro [2021] hypothesized that the role of the number of atoms may be larger when the deep networks include convolutional layers. To investigate this, we repeated this experiment on the MinAtar suite (see Figure 37) and observe that, rather than being dependent on the use of convolutional layers, the role of this parameter is affected by the *environment*. In particular, we observe very little difference between the number of atoms in Asterix, but see a clear difference in SpaceInvaders, where more atoms results in better performance.

## 4 Discussion

There is a growing interest and concern in the effect of hyperparameter choice, and the ensuing reproducibility, for deep reinforcement learning. Henderson et al. [2019] and Islam et al. [2017] highlight issues with reproducibility in RL, including performance differences between different code implementations, hyperparameters, and the high level of non-determinism due to random seeds. Fu et al. [2019] experimentally investigate potential issues of deep Q-learning algorithms. Other large-scale studies similar to ours have been carried out by Andrychowicz et al. [2020], Hussenot et al. [2021], and Paine et al. [2020], but not for online value-based methods.

Figure 1 summarizes our experiments for both agents. We hearken back to the questions raised in the introduction and discuss them with respect to our findings.

**How sensitive are DQN and Rainbow to variations in hyper-parameter selection?** While in aggregate the two agents have comparable sensitivity, there are some notable exceptions. Network capacity seems to be strongly affected by *environment complexity*; indeed, in the simpler classic control environments Rainbow has a higher sensitivity to over-parameterization, while in the more difficult MinAtar suite both algorithms have noticeable sensitivity. Rainbow seems to be more affected by the choice of  $\epsilon$  for the Adam optimizer. High values of  $\epsilon$  make Adam behave more like SGD with Momentum than as diagonal natural gradient descent [Choi et al., 2020]; this leads us to wonder about the relationship between the distributional loss and these different forms of optimization. In the classic control environments, Rainbow seems to be unaffected by different choices of the number of atoms (in contrast with the original findings of Bellemare et al. [2017]); this result may very well be a consequence of the relative simplicity of these environments, as further evidenced by the findings in MinAtar (Figure 37).

**Does the choice of environment vary the sensitivity to hyper-parameter selection?** This is most certainly the case, as we observed stark qualitative differences between MountainCar and the other classic control environments. Indeed, any differences between hyper-parameter values seem to be brought into high-relief when evaluated in MountainCar. Additionally, a somewhat surprising finding is that CartPole (often considered the simplest of all four) proved quite effective at highlighting important qualitative differences between DQN and Rainbow (e.g. network width/depth, optimizer  $\epsilon$ ). We observed similar qualitative differences between the different MinAtar games (e.g. Figure 37 demonstrated the effect of number of atoms is best observed in SpaceInvaders, relative to the other games).



297 Some of our experiments are interesting in that their behavior is different from all other combinations  
298 of actor-environment:

- 299 • While for most environments initializations seemed to have little effect on the performance  
300 of our agents, we see a much higher effect when varying initializations on DQN on Moun-  
301 taincar.
- 302 • Although in general changing activation functions did not impact performance significantly,  
303 we can see that in both DQN on MountainCar, and Rainbow on Breakout there are clearly  
304 activation functions that are better than the rest, most interestingly is how relu6 shows a  
305 clear improvement over all other activations in Rainbow on Breakout.
- 306 • The next striking behavior comes from the depth experiments in DQN on MountainCar, where  
307 we see shallower networks being significantly better than deeper networks, a result opposite  
308 to what we see in the other combinations of agents and classic control environments.
- 309 • The experimental results on MinAtar show that the optimal choice for a number of hyper-  
310 parameters are quite sensitive to the environment itself. Specifically, see the results and  
311 discussion on varying learning rates, layer width,  $\gamma$ , and the update horizon.

312 **Are existing methods under-performing due to a poor hyper-parameter choice?** There are no  
313 canonical hyper-parameter values for the environments considered in this paper; the ones we have  
314 labeled as "default" are using the values provided by Obando-Ceron and Castro [2021]. However,  
315 some interesting findings that merit further investigation are:

- 316 • As mentioned previously, there seems to be a “goldilocks region” for network capacity that  
317 is conditional on the environment. As we observed in Figure 13, a network with a single  
318 hidden layer seems to be sufficient for DQN, and in fact yields improved performance on  
319 MountainCar. On the other hand, in Figure 14 we see that deeper networks can help, but  
320 *only up to a point*.
- 321 • As discussed above, while reward clipping may be useful for the ALE, it is worth revisiting  
322 for any new environment as it can sometimes prove detrimental to performance.
- 323 • Our results suggest both algorithms are quite sensitive to the choice of  $\gamma$ , and this sensitivity  
324 varies across environments. As such, this parameter must be selected with care for new  
325 environments.
- 326 • While 51 atoms may have proved best for the ALE experiments conducted by Bellemare et al.  
327 [2017], our results suggest smaller values can suffice for simpler environments. However,  
328 this question can be somewhat sidestepped by using different parameterizations of the return  
329 distribution [Dabney et al., 2018a,b].
- 330 • Although we provided some insights into some aspects of the replay buffer and network  
331 updates, a more thorough investigation into the relationship between the size and frequency  
332 of updates, dubbed the *replay ratio* by Fedus et al. [2020] is warranted.

333 The present work aims at investigating the importance of a broad set of hyper-parameters that need  
334 to be chosen when designing and implementing off-policy learning algorithms. Although we found  
335 surprising insights on the classic control environments, we would like to run further experiments on  
336 the ALE [Bellemare et al., 2012].

## 337 References

- 338 Ron Amit, Ron Meir, and Kamil Ciosek. Discount factor as a regularizer in reinforcement learning,  
339 2020.
- 340 Marcin Andrychowicz, Anton Raichuk, Piotr Stańczyk, Manu Orsini, Sertan Girgin, Raphael Marinier,  
341 Léonard Hussenot, Matthieu Geist, Olivier Pietquin, Marcin Michalski, Sylvain Gelly, and Olivier  
342 Bachem. What matters in on-policy reinforcement learning? a large-scale empirical study, 2020.
- 343 Oron Anschel, Nir Baram, and Nahum Shimkin. Averaged-dqn: Variance reduction and stabilization  
344 for deep reinforcement learning, 2017.

345 Devansh Arpit, Victor Campos, and Yoshua Bengio. How to initialize your network? robust  
346 initialization for weightnorm & resnets, 2019.

347 Jimmy Lei Ba, Jamie Ryan Kiros, and Geoffrey E. Hinton. Layer normalization, 2016.

348 Marc G. Bellemare, Yavar Naddaf, Joel Veness, and Michael Bowling. The arcade learning environ-  
349 ment: An evaluation platform for general agents. *Journal of Artificial Intelligence Research*, Vol.  
350 47:253–279, 2012. cite arxiv:1207.4708.

351 Marc G. Bellemare, Will Dabney, and R. Munos. A distributional perspective on reinforcement  
352 learning. In *ICML*, 2017.

353 Marc G. Bellemare, Salvatore Candido, Pablo Samuel Castro, Jun Gong, Marlos C. Machado,  
354 Subhodeep Moitra, Sameera S. Ponda, and Ziyu Wang. Autonomous navigation of strato-  
355 spheric balloons using reinforcement learning. *Nature*, 588(7836):77–82, 2020. doi: 10.1038/  
356 s41586-020-2939-8. URL <https://doi.org/10.1038/s41586-020-2939-8>.

357 Aditya Bhatt, Max Argus, Artemij Amiranashvili, and Thomas Brox. Crossnorm: Normalization for  
358 off-policy td reinforcement learning, 2019.

359 Greg Brockman, Vicki Cheung, Ludwig Pettersson, Jonas Schneider, John Schulman, Jie Tang, and  
360 Wojciech Zaremba. Openai gym, 2016.

361 Pablo Samuel Castro, Subhodeep Moitra, Carles Gelada, Saurabh Kumar, and Marc G. Bellemare.  
362 Dopamine: A research framework for deep reinforcement learning, 2018.

363 Dami Choi, Christopher J. Shallue, Zachary Nado, Jaehoon Lee, Chris J. Maddison, and George E.  
364 Dahl. On empirical comparisons of optimizers for deep learning, 2020.

365 Andrea Cini, Carlo D’Eramo, Jan Peters, and Cesare Alippi. Deep reinforcement learning with  
366 weighted q-learning, 2020.

367 W. Dabney, M. Rowland, Marc G. Bellemare, and R. Munos. Distributional reinforcement learning  
368 with quantile regression. In *AAAI*, 2018a.

369 Will Dabney, Georg Ostrovski, David Silver, and Remi Munos. Implicit quantile networks for  
370 distributional reinforcement learning. In *Proceedings of the 35th International Conference on*  
371 *Machine Learning*, volume 80 of *Proceedings of Machine Learning Research*, pages 1096–1105.  
372 PMLR, 2018b.

373 Yann N. Dauphin, Angela Fan, Michael Auli, and David Grangier. Language modeling with gated  
374 convolutional networks. In *Proceedings of the 34th International Conference on Machine Learning*  
375 *- Volume 70*, ICML’17, page 933–941. JMLR.org, 2017.

376 Jacob Devlin, Ming-Wei Chang, Kenton Lee, and Kristina Toutanova. Bert: Pre-training of deep  
377 bidirectional transformers for language understanding, 2019.

378 Stefan Elfving, E. Uchibe, and K. Doya. Sigmoid-weighted linear units for neural network function  
379 approximation in reinforcement learning. *Neural networks : the official journal of the International*  
380 *Neural Network Society*, 107:3–11, 2018.

381 W. Fedus, Prajit Ramachandran, Rishabh Agarwal, Yoshua Bengio, H. Larochelle, Mark Rowland,  
382 and Will Dabney. Revisiting fundamentals of experience replay. In *ICML*, 2020.

383 Meire Fortunato, Mohammad Gheshlaghi Azar, Bilal Piot, Jacob Menick, Ian Osband, Alexander  
384 Graves, Vlad Mnih, Remi Munos, Demis Hassabis, Olivier Pietquin, Charles Blundell, and Shane  
385 Legg. Noisy networks for exploration. 2018.

386 Vincent François-Lavet, Raphael Fonteneau, and Damien Ernst. How to discount deep reinforcement  
387 learning: Towards new dynamic strategies, 2016.

388 Justin Fu, Aviral Kumar, Matthew Soh, and Sergey Levine. Diagnosing bottlenecks in deep q-learning  
389 algorithms, 2019.

390 Carles Gelada and Marc G. Bellemare. Off-policy deep reinforcement learning by bootstrapping the  
391 covariate shift, 2019.

392 Xavier Glorot and Yoshua Bengio. Understanding the difficulty of training deep feedforward  
393 neural networks. In Yee Whye Teh and Mike Titterton, editors, *Proceedings of the Thirteenth  
394 International Conference on Artificial Intelligence and Statistics*, volume 9 of *Proceedings of  
395 Machine Learning Research*, pages 249–256, Chia Laguna Resort, Sardinia, Italy, 13–15 May  
396 2010. PMLR. URL <https://proceedings.mlr.press/v9/glorot10a.html>.

397 Kaiming He, Xiangyu Zhang, Shaoqing Ren, and Jian Sun. Delving deep into rectifiers: Surpassing  
398 human-level performance on imagenet classification, 2015.

399 Peter Henderson, Riashat Islam, Philip Bachman, Joelle Pineau, Doina Precup, and David Meger.  
400 Deep reinforcement learning that matters, 2019.

401 J. Fernando Hernandez-Garcia and Richard S. Sutton. Understanding multi-step deep reinforcement  
402 learning: A systematic study of the dqn target, 2019.

403 Matteo Hessel, Joseph Modayil, H. V. Hasselt, T. Schaul, Georg Ostrovski, Will Dabney, Dan Horgan,  
404 Bilal Piot, M. G. Azar, and D. Silver. Rainbow: Combining improvements in deep reinforcement  
405 learning. In *AAAI*, 2018.

406 Matteo Hessel, Hado van Hasselt, Joseph Modayil, and David Silver. On inductive biases in deep  
407 reinforcement learning. *CoRR*, abs/1907.02908, 2019. URL <http://arxiv.org/abs/1907.02908>.

409 Minyoung Huh, Hossein Mobahi, Richard Zhang, Brian Cheung, Pulkit Agrawal, and Phillip Isola.  
410 The low-rank simplicity bias in deep networks. *arXiv preprint arXiv:2103.10427*, 2021.

411 Leonard Hussenot, Marcin Andrychowicz, Damien Vincent, Robert Dadashi, Anton Raichuk, Lukasz  
412 Stafiniak, Sertan Girgin, Raphael Marinier, Nikola Momchev, Sabela Ramos, Manu Orsini, Olivier  
413 Bachem, Matthieu Geist, and Olivier Pietquin. Hyperparameter selection for imitation learning,  
414 2021.

415 Sergey Ioffe and Christian Szegedy. Batch normalization: Accelerating deep network training by  
416 reducing internal covariate shift, 2015.

417 Riashat Islam, Peter Henderson, Maziar Gomrokchi, and Doina Precup. Reproducibility of bench-  
418 marked deep reinforcement learning tasks for continuous control, 2017.

419 Michael J. Kearns and Satinder P. Singh. Bias-variance error bounds for temporal difference updates.  
420 In *Proceedings of the Thirteenth Annual Conference on Computational Learning Theory, COLT  
421 '00*, page 142–147, San Francisco, CA, USA, 2000. Morgan Kaufmann Publishers Inc. ISBN  
422 155860703X.

423 Diederik P. Kingma and Jimmy Ba. Adam: A method for stochastic optimization. In Yoshua  
424 Bengio and Yann LeCun, editors, *3rd International Conference on Learning Representations,  
425 ICLR 2015, San Diego, CA, USA, May 7-9, 2015, Conference Track Proceedings*, 2015. URL  
426 <http://arxiv.org/abs/1412.6980>.

427 Aviral Kumar, Rishabh Agarwal, Dibya Ghosh, and Sergey Levine. Implicit under-parameterization  
428 inhibits data-efficient deep reinforcement learning, 2020.

429 Timothy P. Lillicrap, Jonathan J. Hunt, Alexander Pritzel, Nicolas Heess, Tom Erez, Yuval Tassa,  
430 David Silver, and Daan Wierstra. Continuous control with deep reinforcement learning, 2019.

431 Clare Lyle, Pablo Samuel Castro, and Marc G. Bellemare. A comparative analysis of expected and  
432 distributional reinforcement learning. In *Proceedings of the Thirty-Third AAAI Conference on  
433 Artificial Intelligence (AAAI'19)*, 2019.

434 Azalia Mirhoseini, Anna Goldie, Mustafa Yazgan, Joe Wenjie Jiang, Ebrahim Songhori, Shen  
435 Wang, Young-Joon Lee, Eric Johnson, Omkar Pathak, Azade Nazi, Jiwoo Pak, Andy Tong,  
436 Kavya Srinivasa, William Hang, Emre Tuncer, Quoc V. Le, James Laudon, Richard Ho, Roger  
437 Carpenter, and Jeff Dean. A graph placement methodology for fast chip design. *Nature*, 594  
438 (7862):207–212, 2021. doi: 10.1038/s41586-021-03544-w. URL <https://doi.org/10.1038/s41586-021-03544-w>.

Volodymyr Mnih, Koray Kavukcuoglu, David Silver, Andrei A. Rusu, Joel Veness, Marc G. Belle-  
mare, Alex Graves, Martin Riedmiller, Andreas K. Fidjeland, Georg Ostrovski, Stig Petersen,  
Charles Beattie, Amir Sadik, Ioannis Antonoglou, Helen King, Dharshan Kumaran, Daan Wierstra,  
Shane Legg, and Demis Hassabis. Human-level control through deep reinforcement learning.  
*Nature*, 518(7540):529–533, February 2015.

Volodymyr Mnih, Adrià Puigdomènech Badia, Mehdi Mirza, Alex Graves, Timothy P. Lillicrap, Tim  
Harley, David Silver, and Koray Kavukcuoglu. Asynchronous methods for deep reinforcement  
learning, 2016.

Johan S Obando-Ceron and Pablo Samuel Castro. Revisiting rainbow: Promoting more insightful and  
inclusive deep reinforcement learning research. In *International Conference on Machine Learning  
(ICML)*, 2021.

Tom Le Paine, Cosmin Paduraru, Andrea Michi, Caglar Gulcehre, Konrad Zolna, Alexander Novikov,  
Ziyu Wang, and Nando de Freitas. Hyperparameter selection for offline reinforcement learning,  
2020.

Tim Salimans and Diederik P. Kingma. Weight normalization: A simple reparameterization to  
accelerate training of deep neural networks, 2016.

Andrew M. Saxe, James L. McClelland, and Surya Ganguli. Exact solutions to the nonlinear dynamics  
of learning in deep linear neural networks, 2014.

T. Schaul, John Quan, Ioannis Antonoglou, and D. Silver. Prioritized experience replay. *CoRR*,  
abs/1511.05952, 2016.

G. Shamir, Dong Lin, and Lorenzo Coviello. Smooth activations and reproducibility in deep networks.  
*ArXiv*, abs/2010.09931, 2020.

David Silver, Aja Huang, Chris J. Maddison, Arthur Guez, Laurent Sifre, George van den Driessche,  
Julian Schrittwieser, Ioannis Antonoglou, Veda Panneershelvam, Marc Lanctot, Sander Dieleman,  
Dominik Grewe, John Nham, Nal Kalchbrenner, Ilya Sutskever, Timothy Lillicrap, Madeleine  
Leach, Koray Kavukcuoglu, Thore Graepel, and Demis Hassabis. Mastering the game of Go with  
deep neural networks and tree search. *Nature*, 529(7587):484–489, jan 2016. ISSN 0028-0836.  
doi: 10.1038/nature16961.

David Silver, Julian Schrittwieser, Karen Simonyan, Ioannis Antonoglou, Aja Huang, Arthur Guez,  
Thomas Hubert, Lucas Baker, Matthew Lai, Adrian Bolton, Yutian Chen, Timothy Lillicrap, Fan  
Hui, Laurent Sifre, George Driessche, Thore Graepel, and Demis Hassabis. Mastering the game of  
go without human knowledge. *Nature*, 550:354–359, 10 2017. doi: 10.1038/nature24270.

Samarth Sinha, Homanga Bharadhwaj, Aravind Srinivas, and Animesh Garg. D2rl: Deep dense  
architectures in reinforcement learning, 2020.

Richard S. Sutton. Learning to predict by the methods of temporal differences. *Machine Learning*, 3  
(1):9–44, August 1988.

Richard S. Sutton and Andrew G. Barto. *Introduction to Reinforcement Learning*. MIT Press,  
Cambridge, MA, USA, 1st edition, 1998. ISBN 0262193981.

Mingxing Tan and Quoc V. Le. Efficientnet: Rethinking model scaling for convolutional neural  
networks, 2020.

Hado van Hasselt, Arthur Guez, Matteo Hessel, Volodymyr Mnih, and David Silver. Learning values  
across many orders of magnitude, 2016a.

Hado van Hasselt, Arthur Guez, and David Silver. Deep reinforcement learning with double q-  
learning. In *Proceedings of the Thirtieth AAAI Conference On Artificial Intelligence (AAAI)*,  
2016, 2016b. cite arxiv:1509.06461Comment: AAAI 2016.

Harm van Seijen, Mehdi Fatemi, and Arash Tavakoli. Using a logarithmic mapping to enable lower  
discount factors in reinforcement learning, 2019.

- 487 Ziyu Wang, Tom Schaul, Matteo Hessel, Hado Hasselt, Marc Lanctot, and Nando Freitas. Dueling  
488 network architectures for deep reinforcement learning. In *Proceedings of the 33rd International*  
489 *Conference on Machine Learning*, volume 48, pages 1995–2003, 2016.
- 490 Saining Xie, Ross Girshick, Piotr Dollár, Zhuowen Tu, and Kaiming He. Aggregated residual  
491 transformations for deep neural networks, 2017.
- 492 Kenny Young and Tian Tian. Minatar: An atari-inspired testbed for thorough and reproducible  
493 reinforcement learning experiments, 2019.

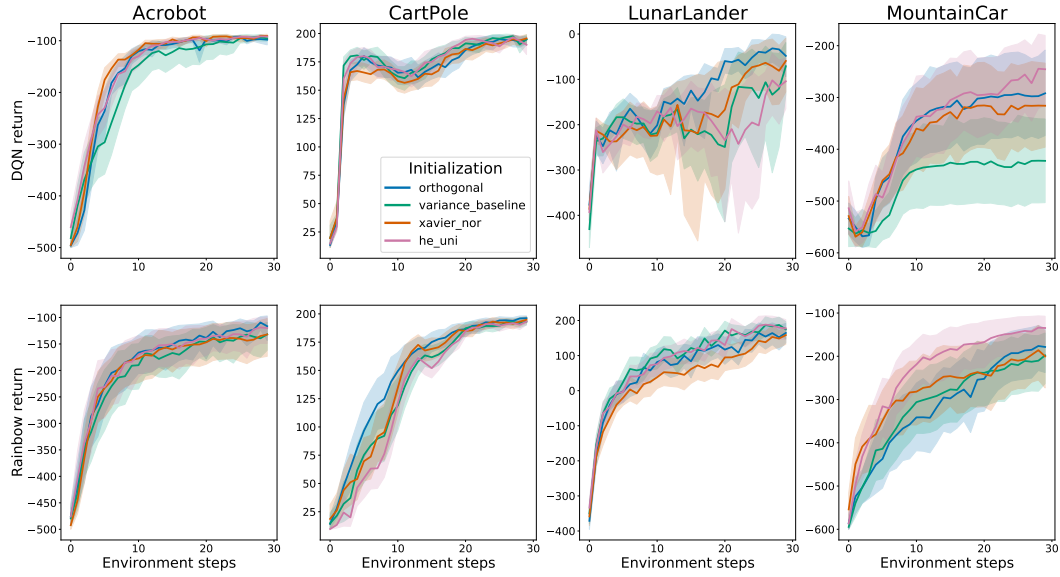

Figure 5: Comparison of initializations on DQN (top) and Rainbow (bottom). The default initialization is Xavier Normal.

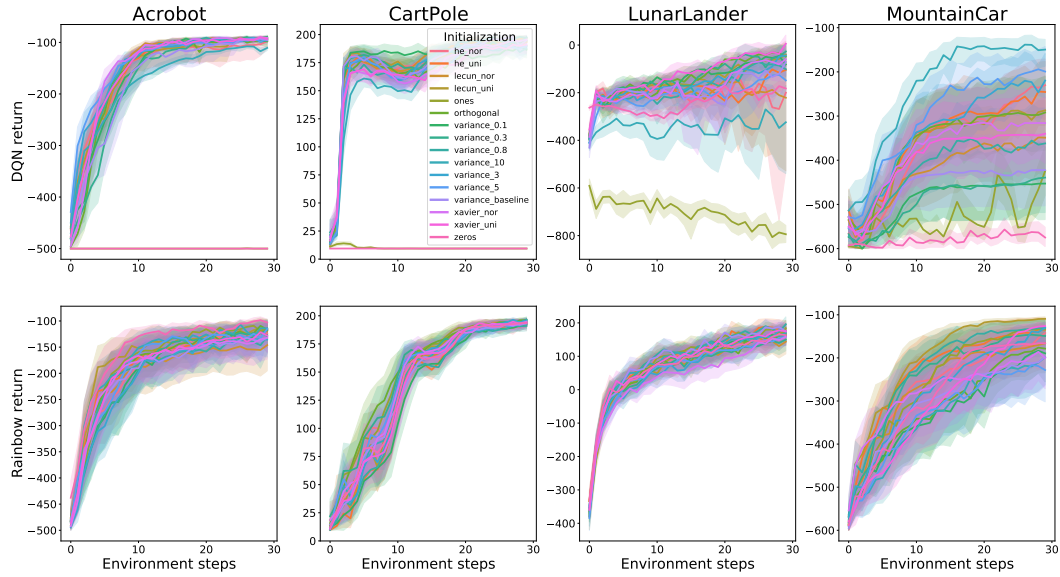

Figure 6: Comparison of all initializations on DQN (top) and Rainbow (bottom). The default initialization is Xavier Normal.

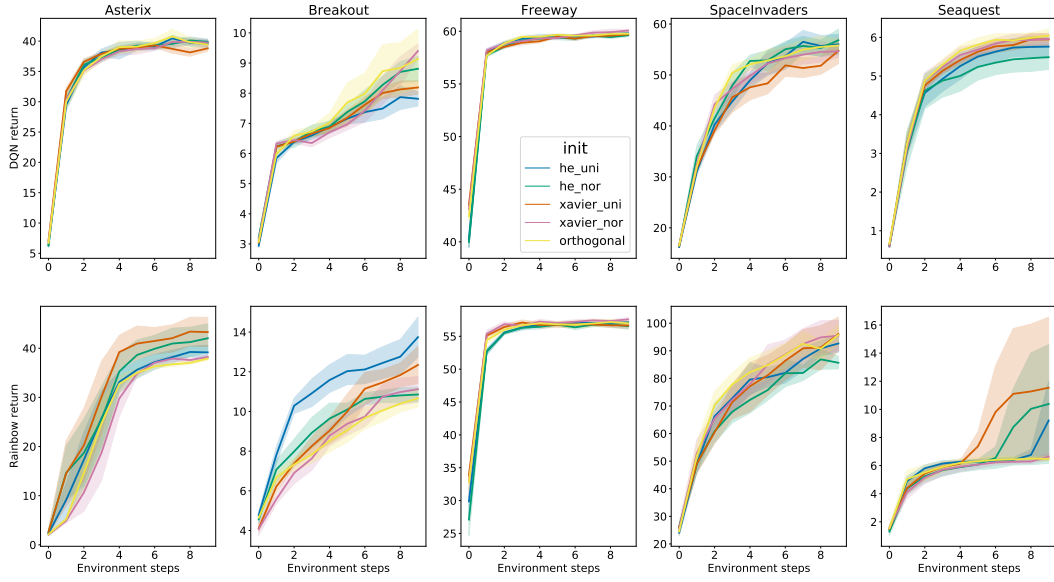

Figure 7: MinAtar comparison of initializations on DQN (top) and Rainbow (bottom). The default initialization is Xavier Normal.

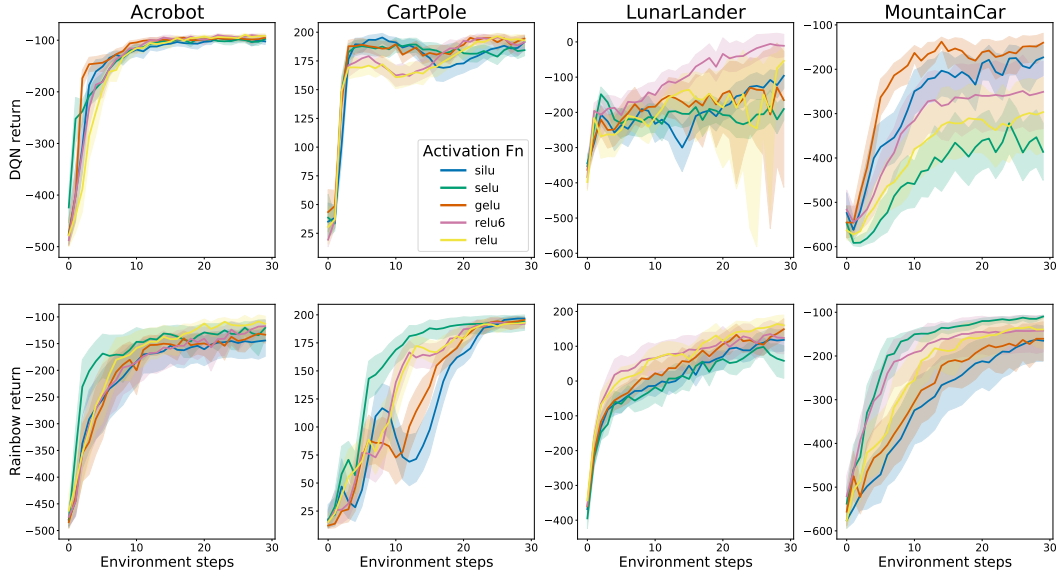

Figure 8: Comparison of activations on DQN (top) and Rainbow (bottom). The Default Activation is ReLU.

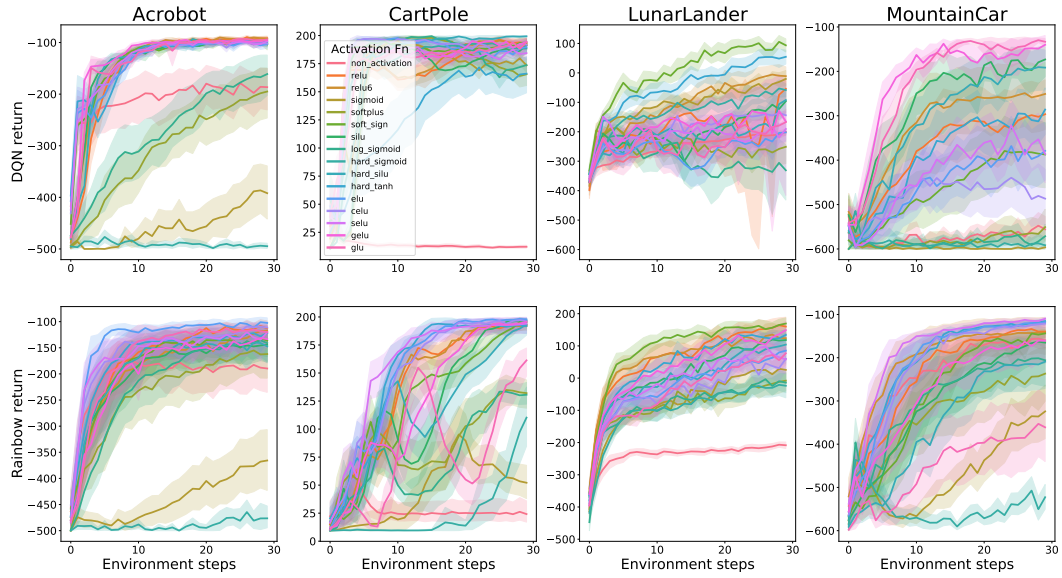

Figure 9: Comparison of all activations on DQN (top) and Rainbow (bottom). The default activation is ReLU.

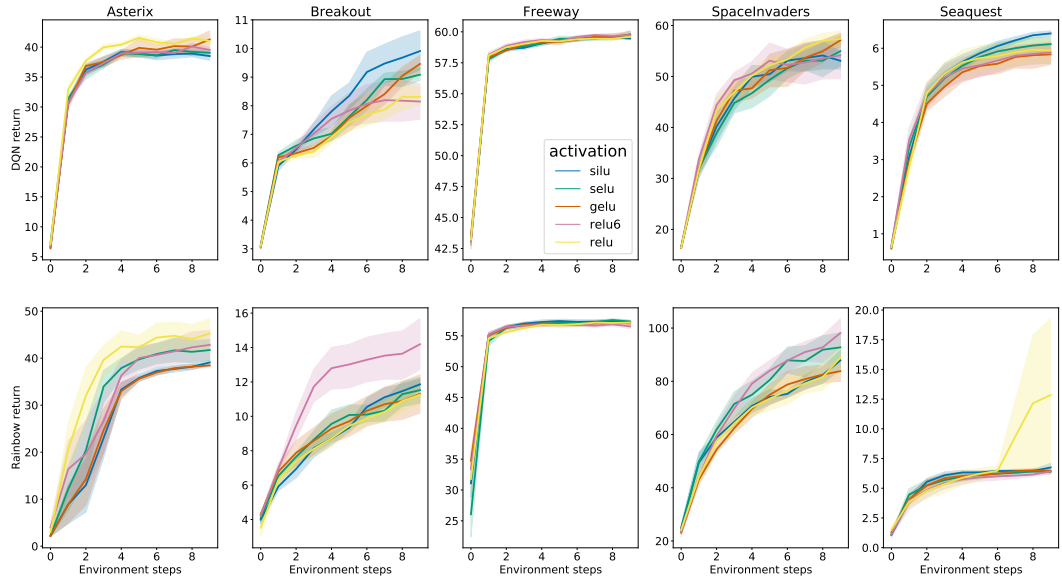

Figure 10: MinAtar comparison of activations on DQN (top) and Rainbow (bottom). The default initialization is Xavier Normal.



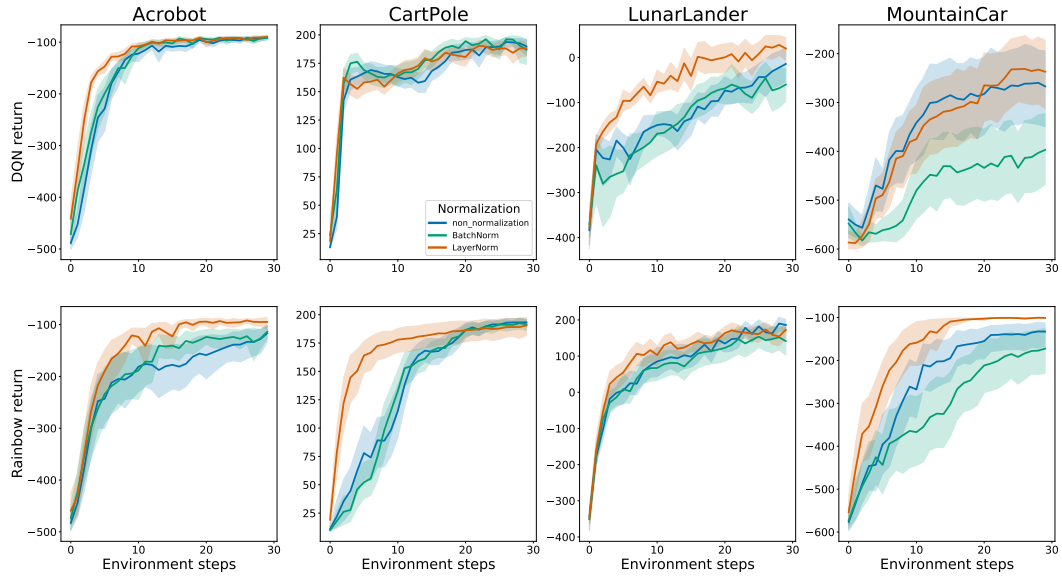

Figure 11: Comparison of normalization on DQN (top) and Rainbow (bottom). The default normalization is None.

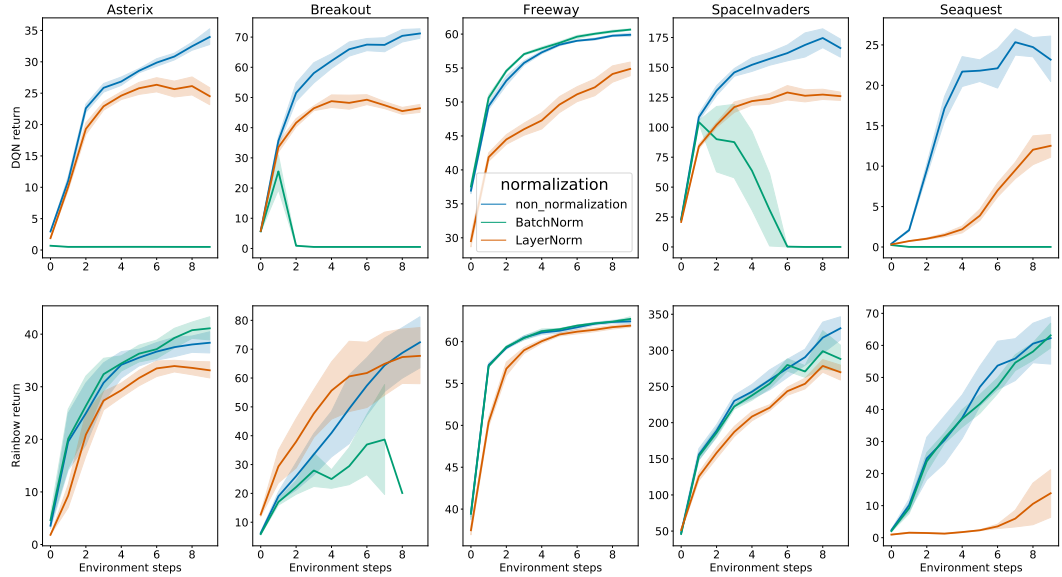

Figure 12: MinAtar comparison of normalization on DQN (top) and Rainbow (bottom). The default normalization is None.

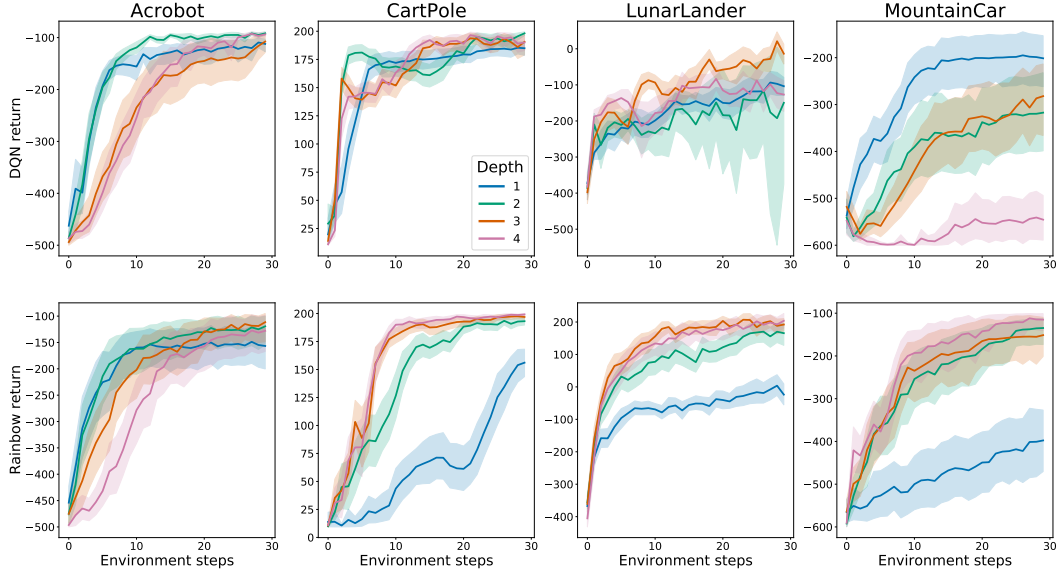

Figure 13: Comparison of depth on DQN (top) and Rainbow (bottom). The default depth is 2.

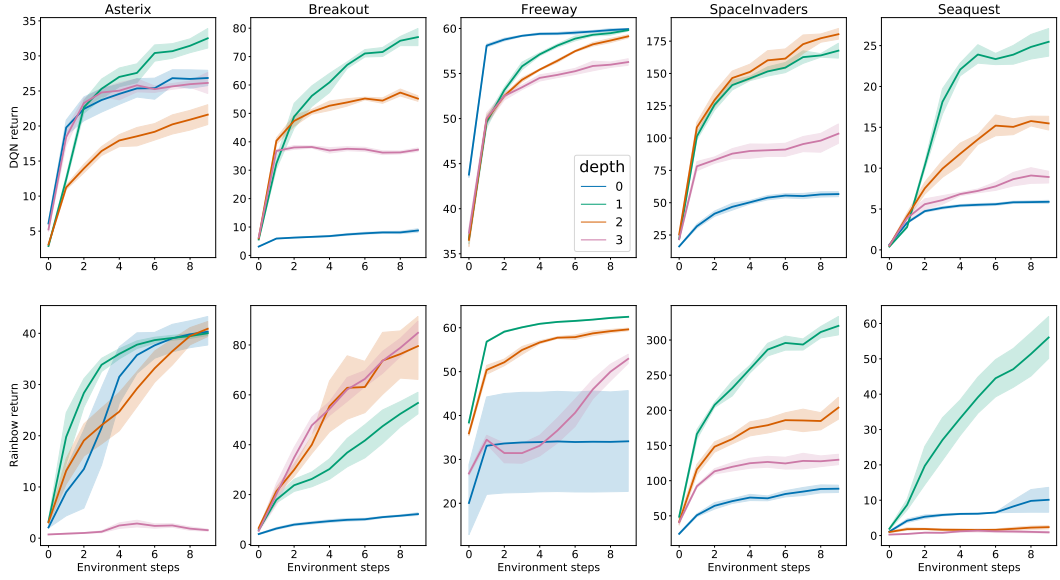

Figure 14: MinAtar comparison of the number of dense layers (on top of the single convolutional layer) on DQN (top) and Rainbow (bottom). The default is a depth of 0.

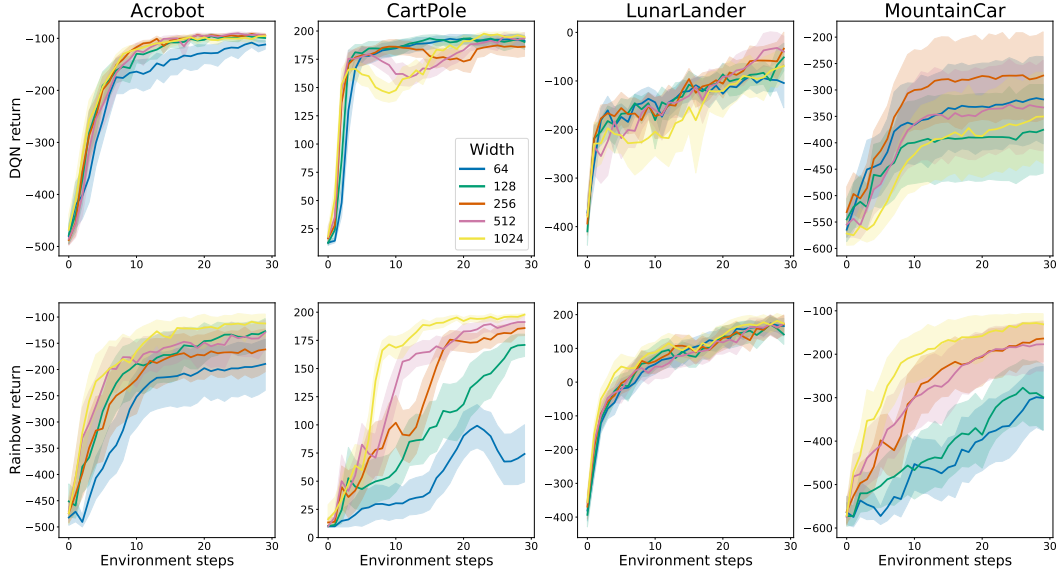

Figure 15: Comparison of width on DQN (top) and Rainbow (bottom). The default width is 512.

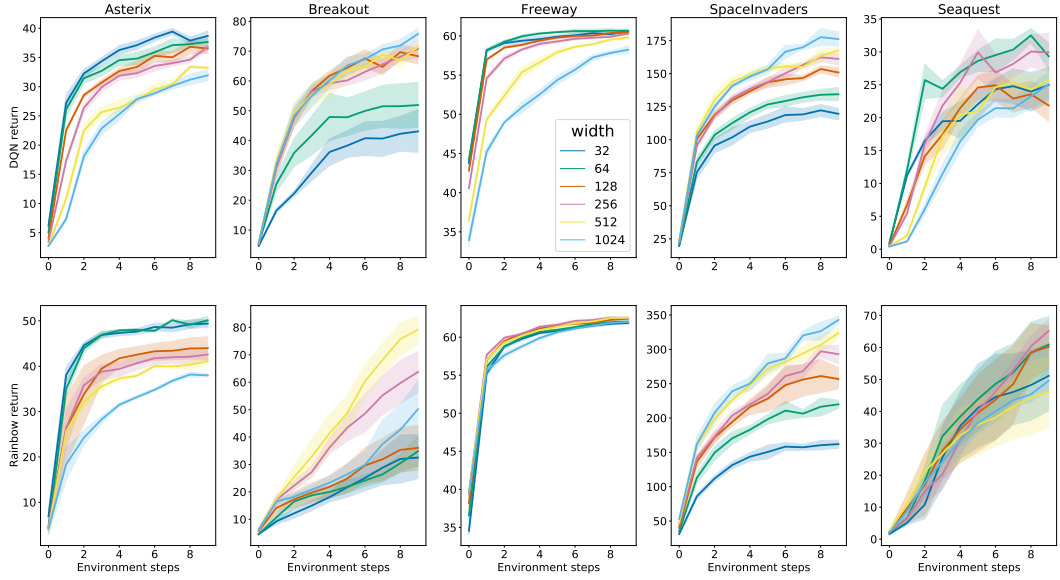

Figure 16: MinAtar comparison of width of one dense layer (on top of the single convolutional layer) on DQN (top) and Rainbow (bottom). The default is a depth of 0.

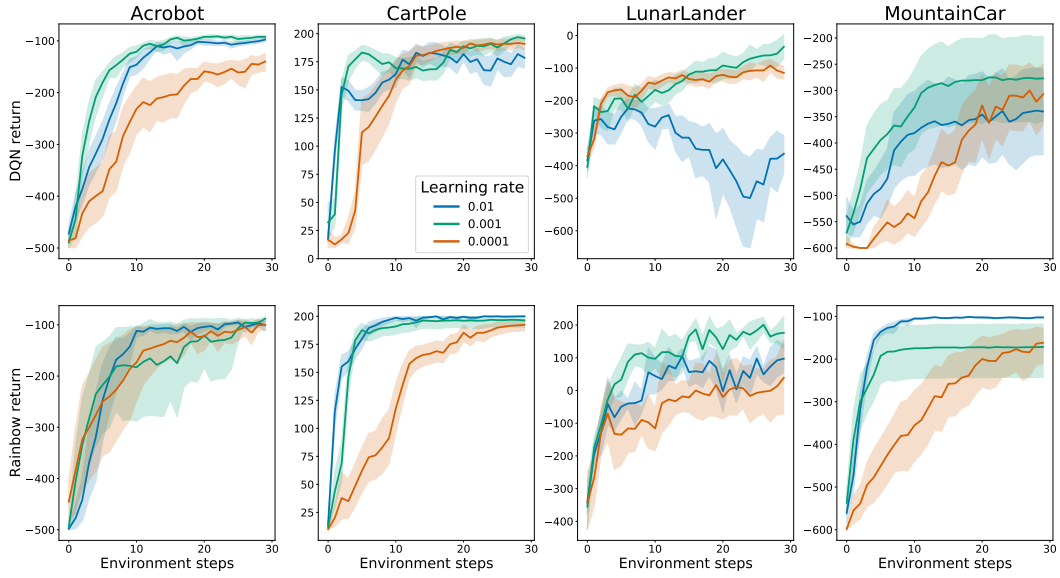

Figure 17: Comparison of learning rates on DQN (top) and Rainbow (bottom). The default learning rate is 0.001, except for MountainCar where it is 0.01.

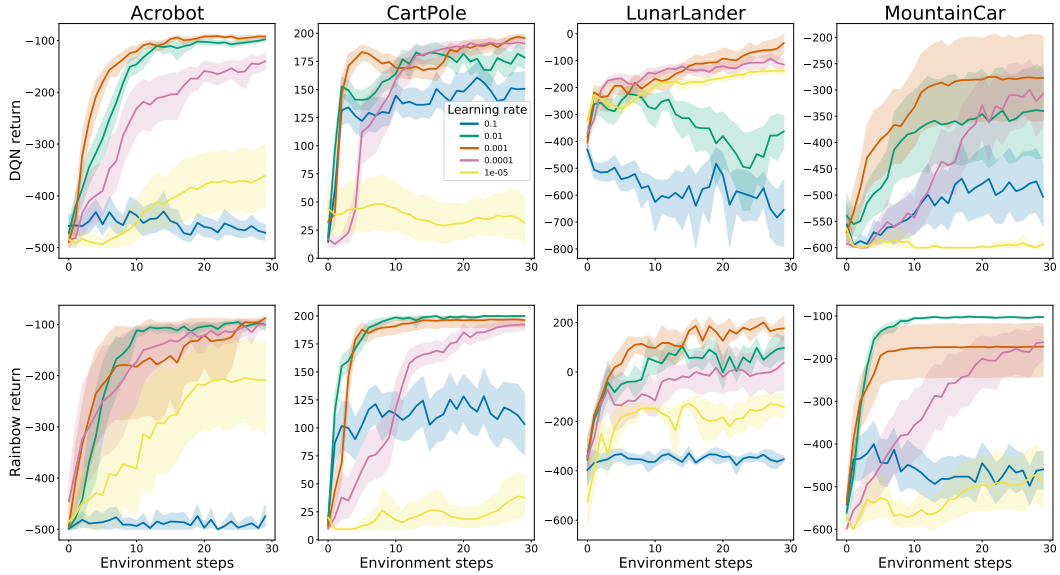

Figure 18: Comparison of all learning rates on DQN (top) and Rainbow (bottom). The default learning rate is 0.001, except for MountainCar where it is 0.01.

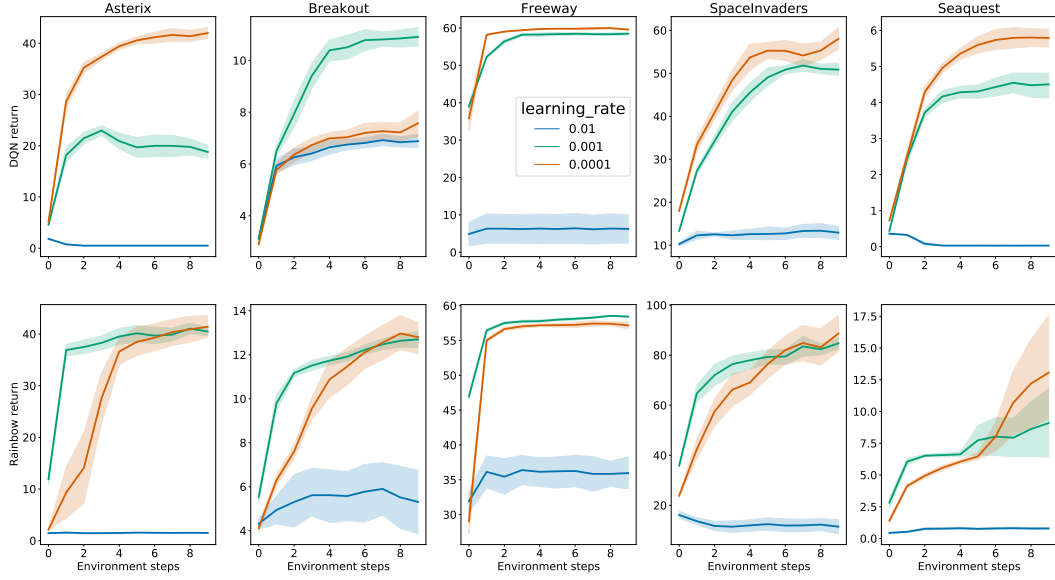

Figure 19: MinAtar comparison of learning rates on DQN (top) and Rainbow (bottom).

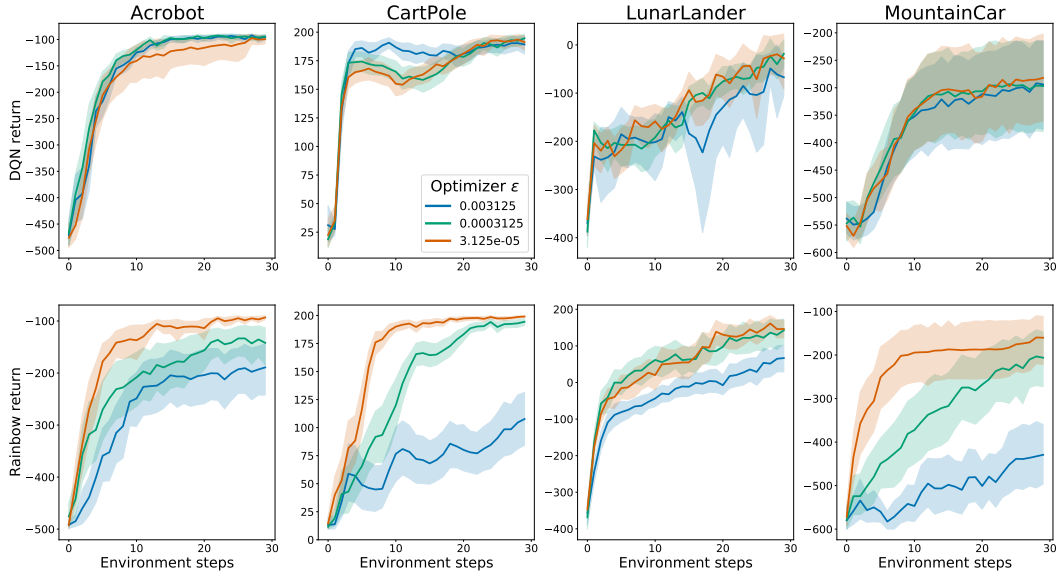

Figure 20: Comparison of optimizer  $\epsilon$  on DQN (top) and Rainbow (bottom). The default  $\epsilon$  is 0.0003125.

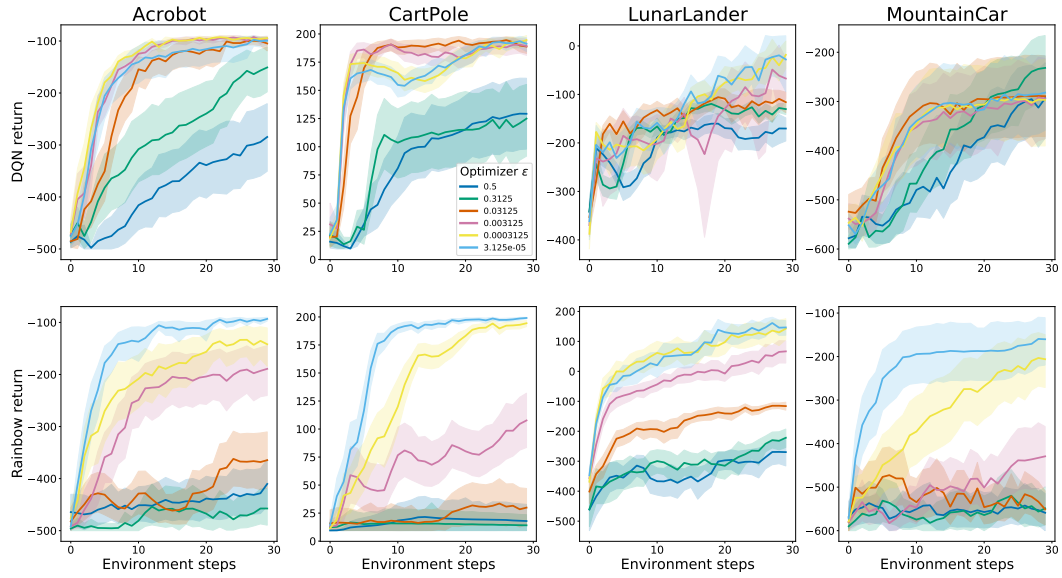

Figure 21: Comparison of all optimizer  $\epsilon$  values on DQN (top) and Rainbow (bottom). The default  $\epsilon$  is 0.0003125.

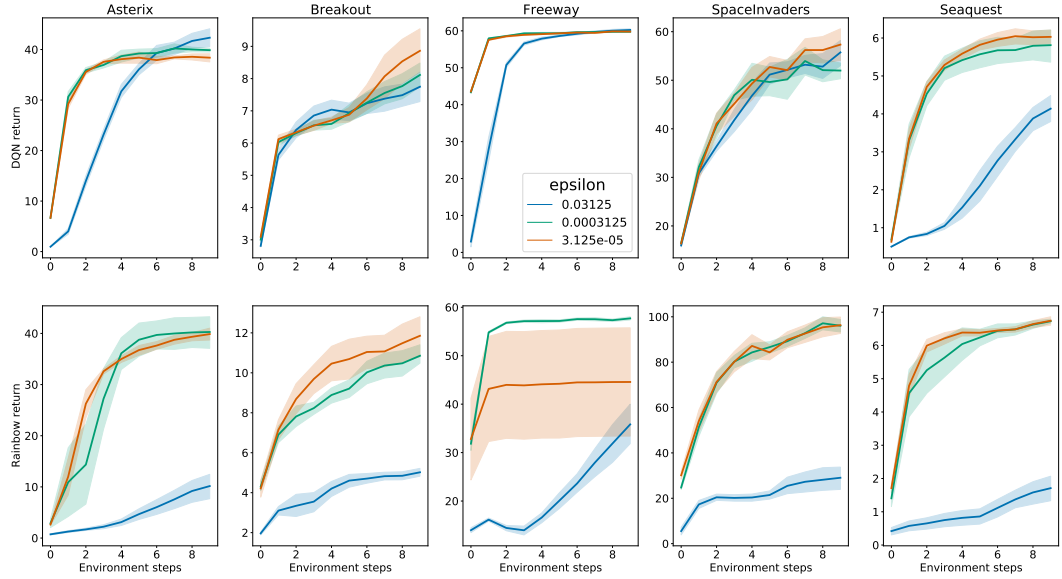

Figure 22: Minatar comparison of optimizer  $\epsilon$  on DQN (top) and Rainbow (bottom). The default  $\epsilon$  is 0.0003125.

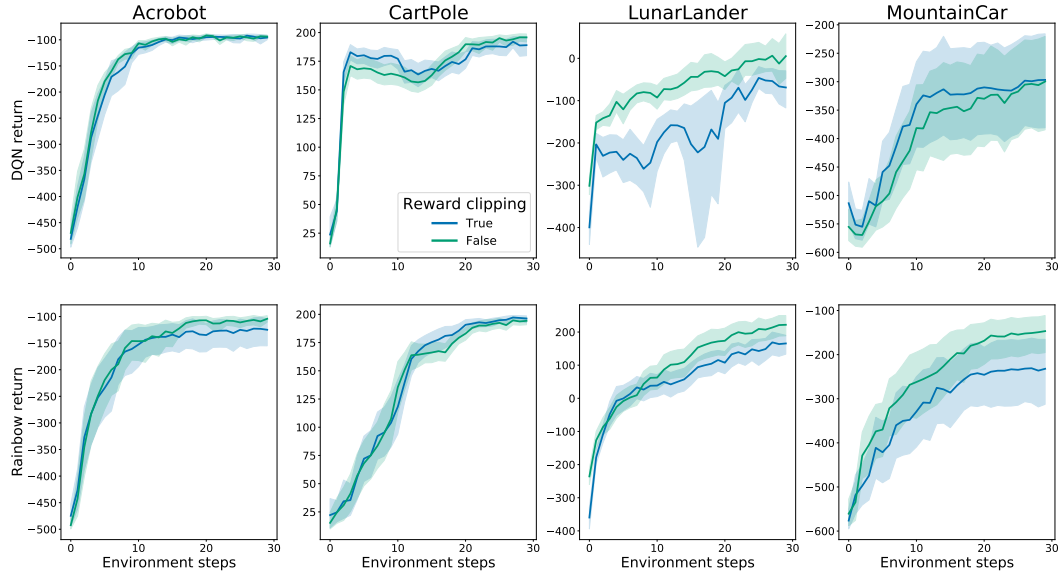

Figure 23: Comparison of reward clipping on DQN (top) and Rainbow (bottom). The default is True.

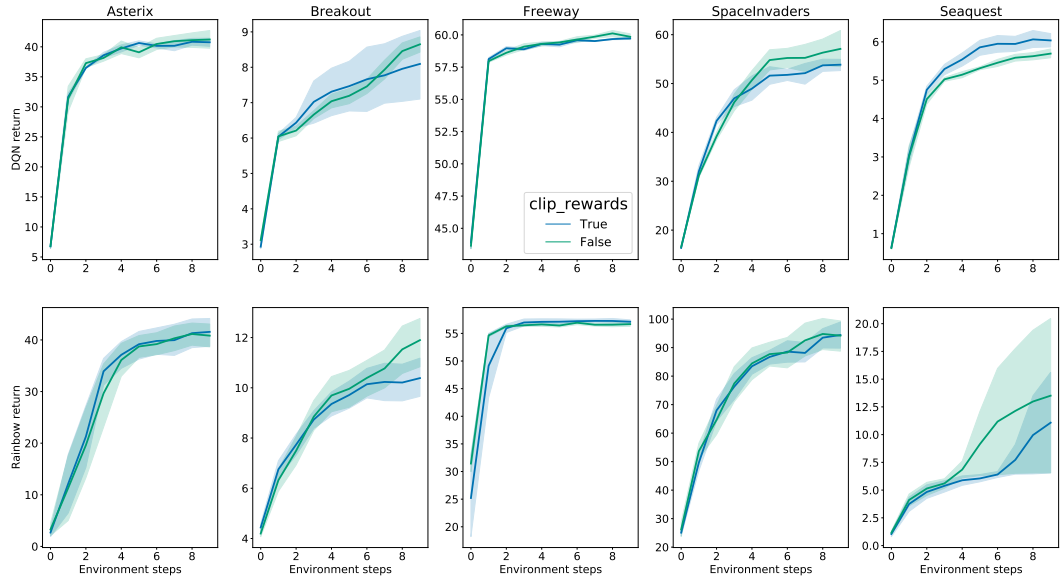

Figure 24: MinAtar comparison of reward clipping on DQN (top) and Rainbow (bottom). The default is True.

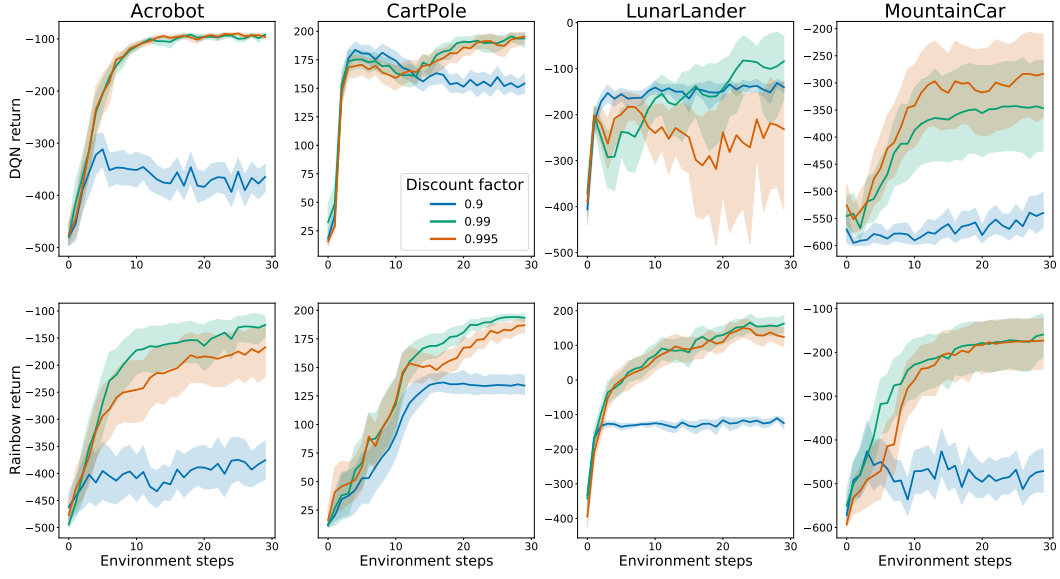

Figure 25: Comparison of  $\gamma$  on DQN (top) and Rainbow (bottom). The default  $\gamma$  is 0.99.

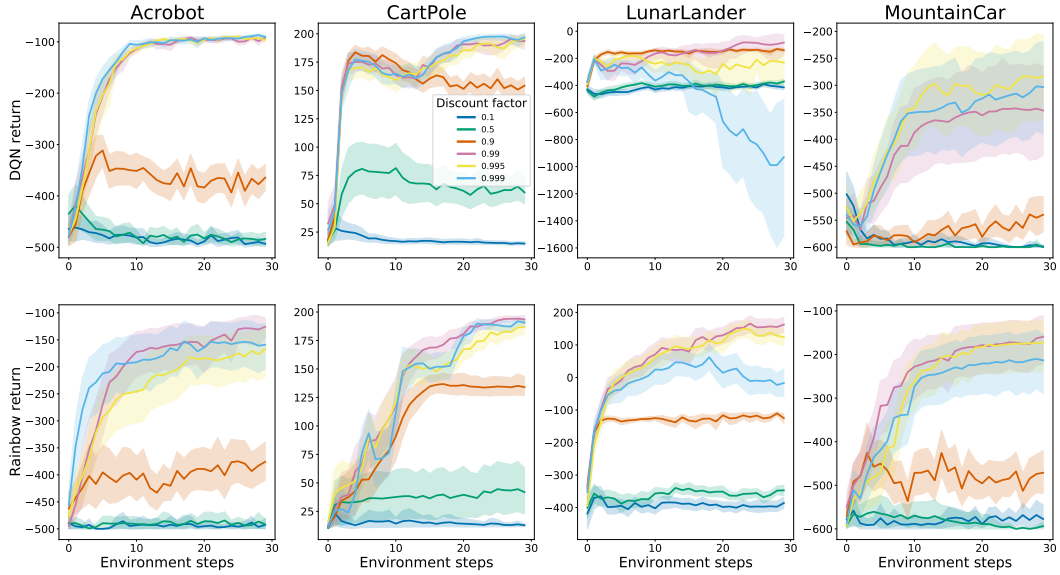

Figure 26: Comparison of all  $\gamma$  values on DQN (top) and Rainbow (bottom). The default  $\gamma$  is 0.99.



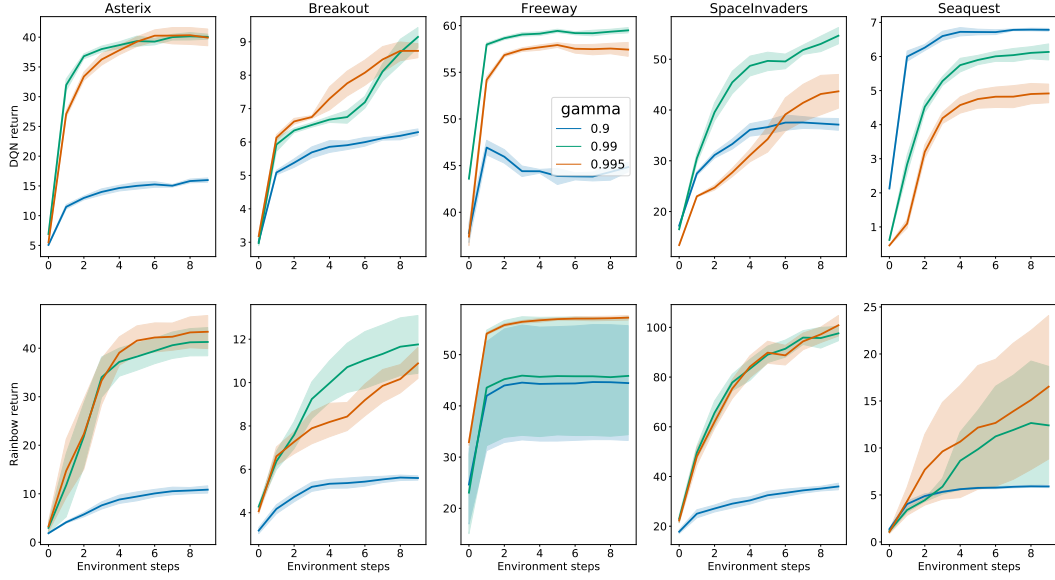

Figure 27: MinAtar comparison of  $\gamma$  on DQN (top) and Rainbow (bottom). The default  $\gamma$  is 0.99.

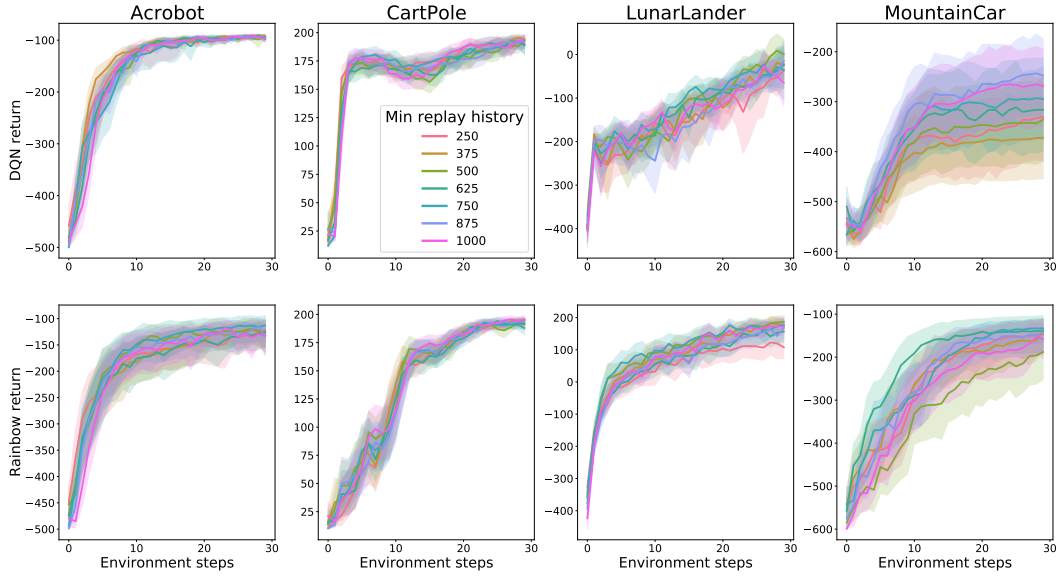

Figure 28: Comparison of minimum replay history on DQN (top) and Rainbow (bottom). The default value is 500.

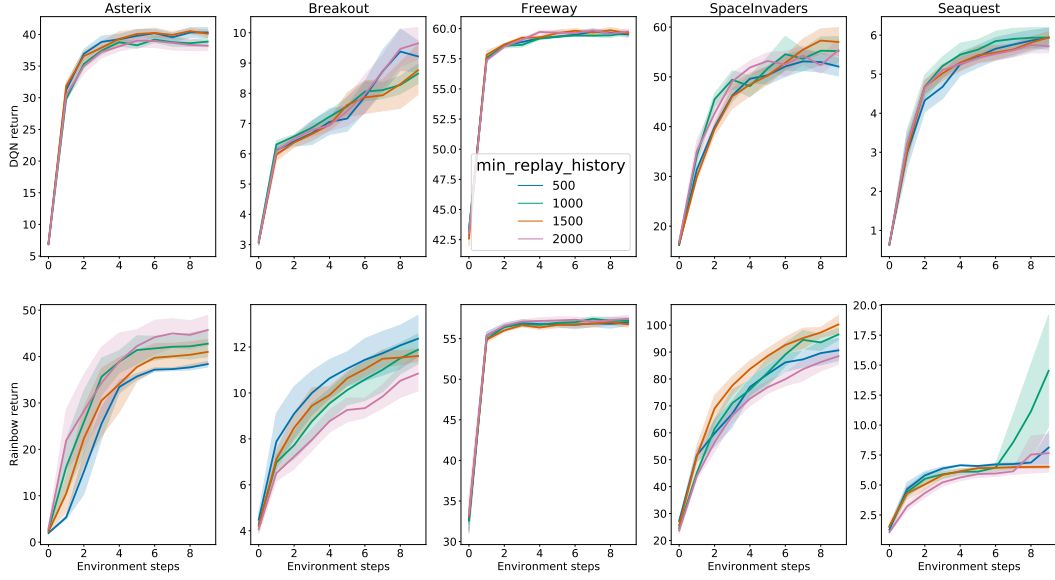

Figure 29: MinAtar comparison of minimum replay history on DQN (top) and Rainbow (bottom).

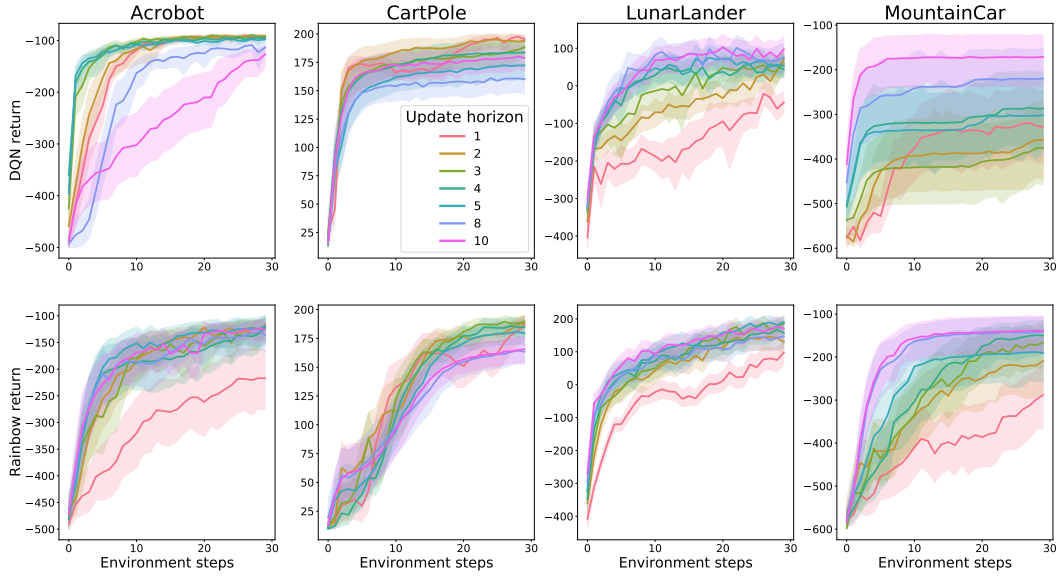

Figure 30: Comparison of update horizon on DQN (top) and Rainbow (bottom). The default value for DQN is 1, while for Rainbow it is 3.

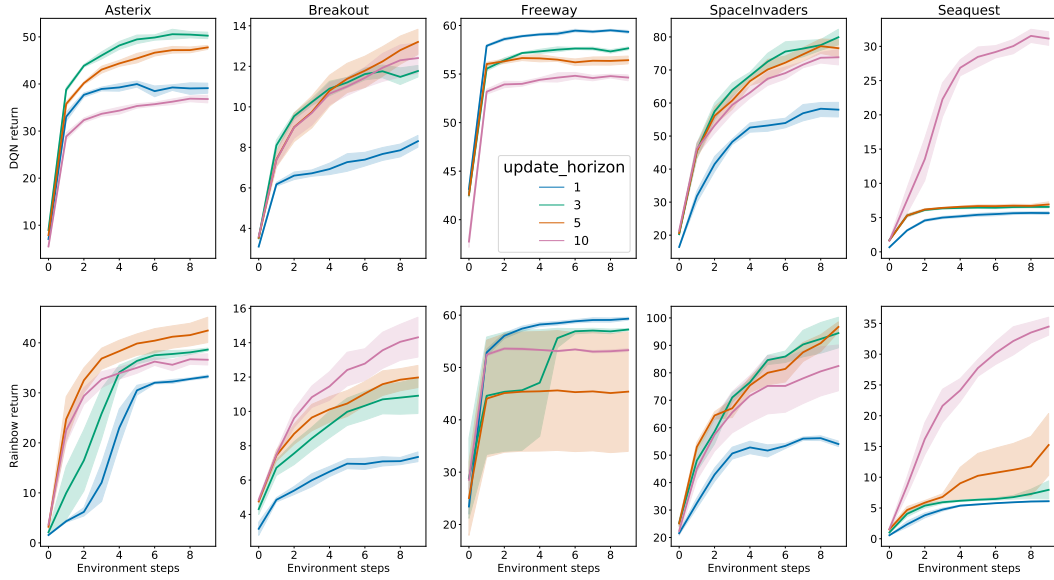

Figure 31: MinAtar comparison of update horizon on DQN (top) and Rainbow (bottom). The default value for DQN is 1, while for Rainbow it is 3.

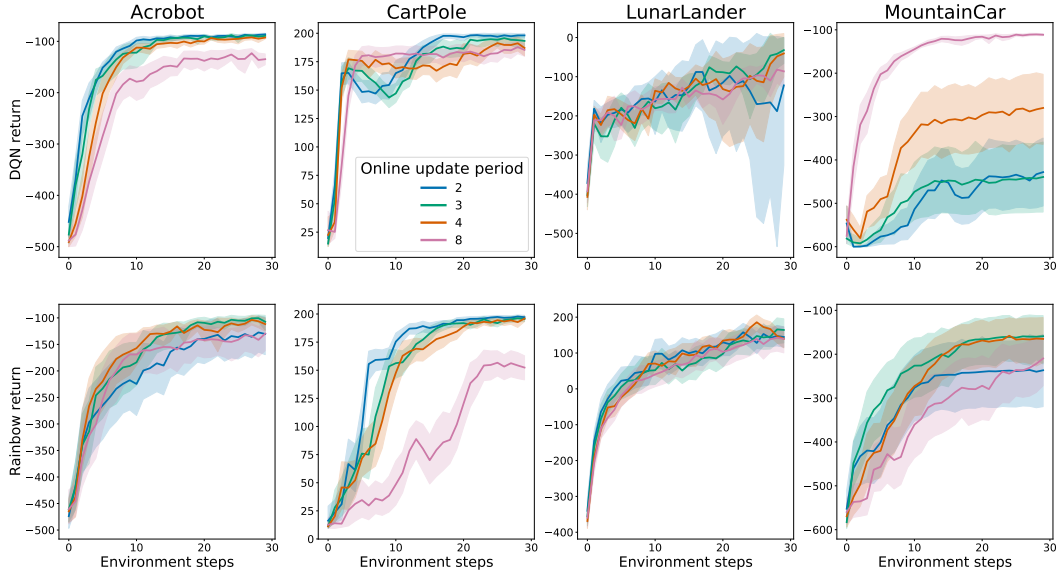

Figure 32: Comparison of online network update period on DQN (top) and Rainbow (bottom). The default value is 4.

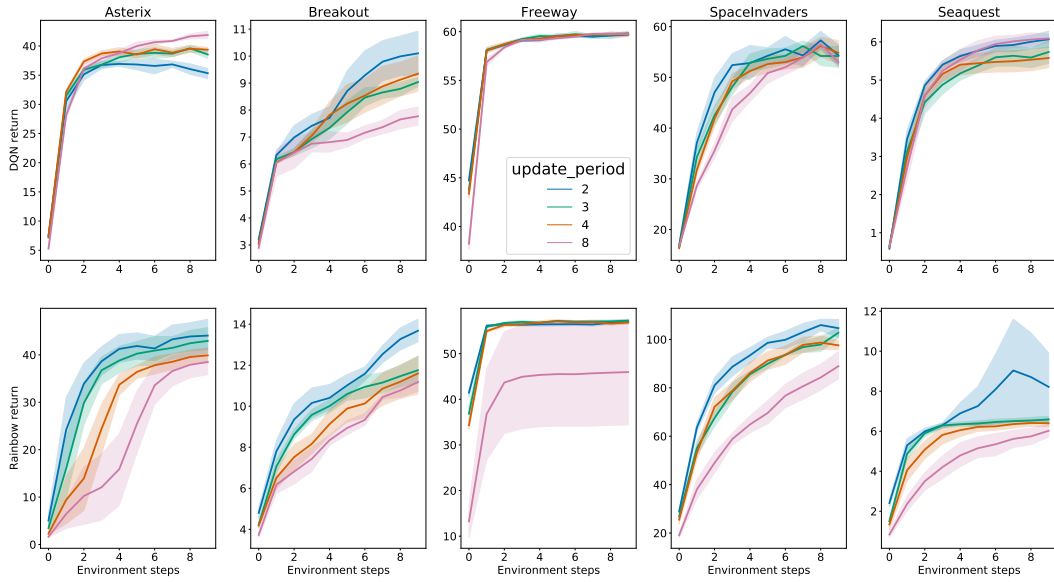

Figure 33: MinAtar comparison of online network update period on DQN (top) and Rainbow (bottom). The default value is 4.

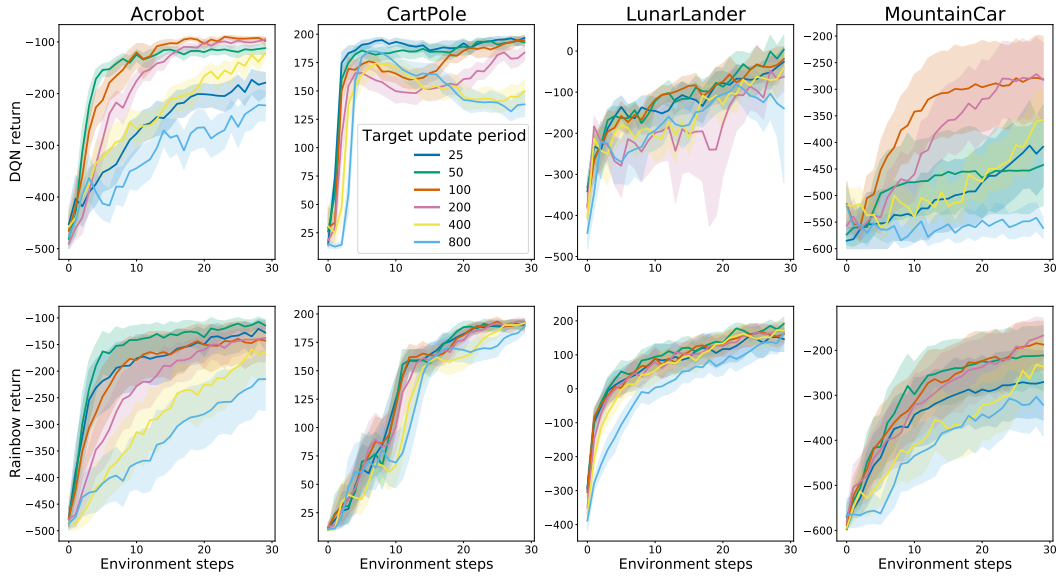

Figure 34: Comparison of target network update period on DQN (top) and Rainbow (bottom). The default value is 100.

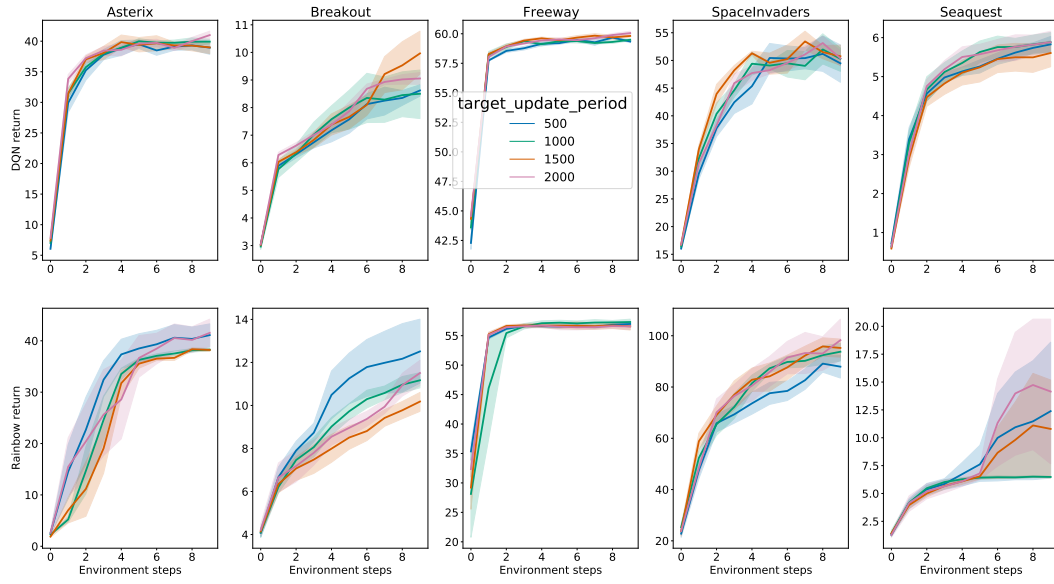

Figure 35: MinAtar comparison of target network update period on DQN (top) and Rainbow (bottom).

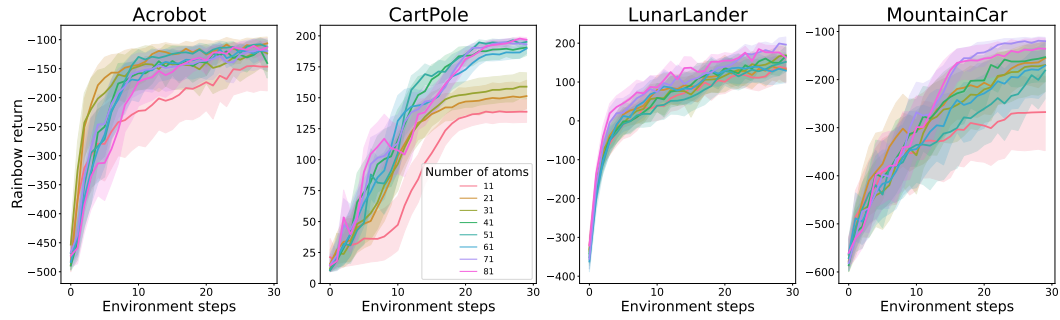

Figure 36: Comparison of number of atoms on Rainbow. The default value is 51.

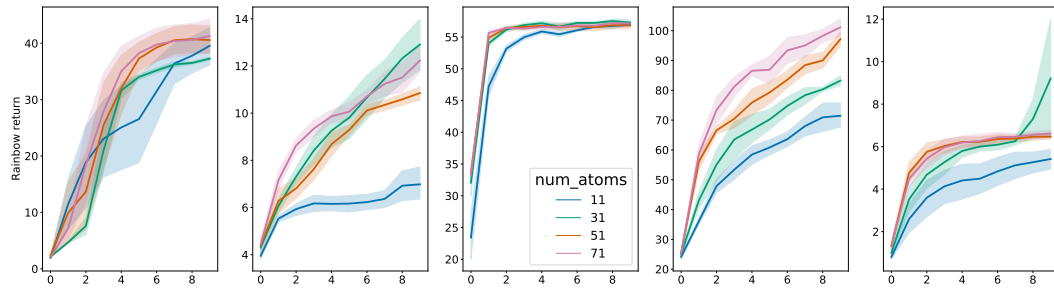

Figure 37: MinAtar comparison of number of atoms on Rainbow. The default value is 51.

495 **B Best Hyperparameters settings for DQN and Rainbow accross the**  
496 **environments**

497 Table 1 shows the best values for each hyperparameter across all the classic control environments and  
498 MinAtar games.

| Table 1: Best Hyperparameters settings for DQN and Rainbow accross the environments |                      |            |                   |                     |
|-------------------------------------------------------------------------------------|----------------------|------------|-------------------|---------------------|
| Hyperparameter                                                                      | Classic control envs |            | MinAtar           |                     |
|                                                                                     | DQN                  | Rainbow    | DQN               | Rainbow             |
| gamma                                                                               | 0.99                 | 0.99       |                   |                     |
| update horizon                                                                      | 4                    | 10         |                   |                     |
| min replay history                                                                  | 1000                 | 625        |                   |                     |
| update period                                                                       | 4                    | 2          |                   |                     |
| target update period                                                                | 100                  | 50         |                   |                     |
| hidden layer                                                                        | 1                    | 3          | 1                 | 1                   |
| neurons                                                                             | 256                  | 1024       |                   |                     |
| initialization                                                                      | Orthogonal           | He uniform | Orthogonal        | Xavier uniform      |
| activation function                                                                 | Gelu                 | Selu       |                   |                     |
| normalization                                                                       | LayerNorm            | LayerNorm  | Non-normalization | Batch-normalization |
| num atoms                                                                           |                      | 71         |                   | 71                  |
| clip                                                                                | False                | False      |                   |                     |
| learning rate                                                                       | 0.001                | 0.01       |                   |                     |
| eps                                                                                 | 0.003125             | 3.125e-5   | 3.125e-5          | 0.0003125           |

499 **C Hyperparameters settings for Classic control environments and MinAtar**  
500 **games**

501 Table 2, 3, 4 list the choice configurations we used to run several experiments on classic control  
502 environments and MinAtar games.

Table 2: Hyperparameters settings for Classic control environments and MinAtar games

| activation   | init              | learning_rate | epsilon   | normalization |
|--------------|-------------------|---------------|-----------|---------------|
| None         | orthogonal        | 10            | 1         | None          |
| relu         | zeros             | 5             | 0.5       | BatchNorm     |
| relu6        | ones              | 2             | 0.3125    | LayerNorm     |
| sigmoid      | xavier_uni        | 1             | 0.03125   |               |
| softplus     | xavier_nor        | 0.1           | 0.003125  |               |
| soft_sign    | lecun_uni         | 0.01          | 0.0003125 |               |
| silu         | lecun_nor         | 0.001         | 3.125e-05 |               |
| swish        | he_uni            | 0.0001        | 3.125e-06 |               |
| log_sigmoid  | he_nor            | 1e-05         |           |               |
| hard_sigmoid | variance_baseline |               |           |               |
| hard_silu    | variance_0.1      |               |           |               |
| hard_swish   | variance_0.3      |               |           |               |
| hard_tanh    | variance_0.8      |               |           |               |
| elu          | variance_3        |               |           |               |
| celu         | variance_5        |               |           |               |
| selu         | variance_10       |               |           |               |
| gelu         |                   |               |           |               |
| glu          |                   |               |           |               |

Table 3: Hyperparameters settings for Classic control environments and MinAtar games

| target_update_period | update_period | width | depth |
|----------------------|---------------|-------|-------|
| 10                   | 1             | 32    | 1     |
| 25                   | 2             | 64    | 2     |
| 50                   | 3             | 128   | 3     |
| 100                  | 4             | 256   | 4     |
| 200                  | 8             | 512   |       |
| 400                  | 10            | 1024  |       |
| 800                  | 12            |       |       |
| 1600                 |               |       |       |

Table 4: Hyperparameters settings for Classic control environments and MinAtar games

| min_replay_history | update_horizon | gamma | num_atoms | clip_rewards |
|--------------------|----------------|-------|-----------|--------------|
| 125                | 1              | 0.1   | 11        | True         |
| 250                | 2              | 0.5   | 21        | False        |
| 375                | 3              | 0.9   | 31        |              |
| 500                | 4              | 0.99  | 41        |              |
| 625                | 5              | 0.995 | 51        |              |
| 750                | 8              | 0.999 | 61        |              |
| 875                | 10             |       |           |              |
| 1000               |                |       |           |              |
