# Supplementary material
Source: ML conference proceedings conference paper supplement (https://openreview.net/forum?id=Ws4v7nSqqb)
Supplement: supplementary_material [file attachment]

Acrobot

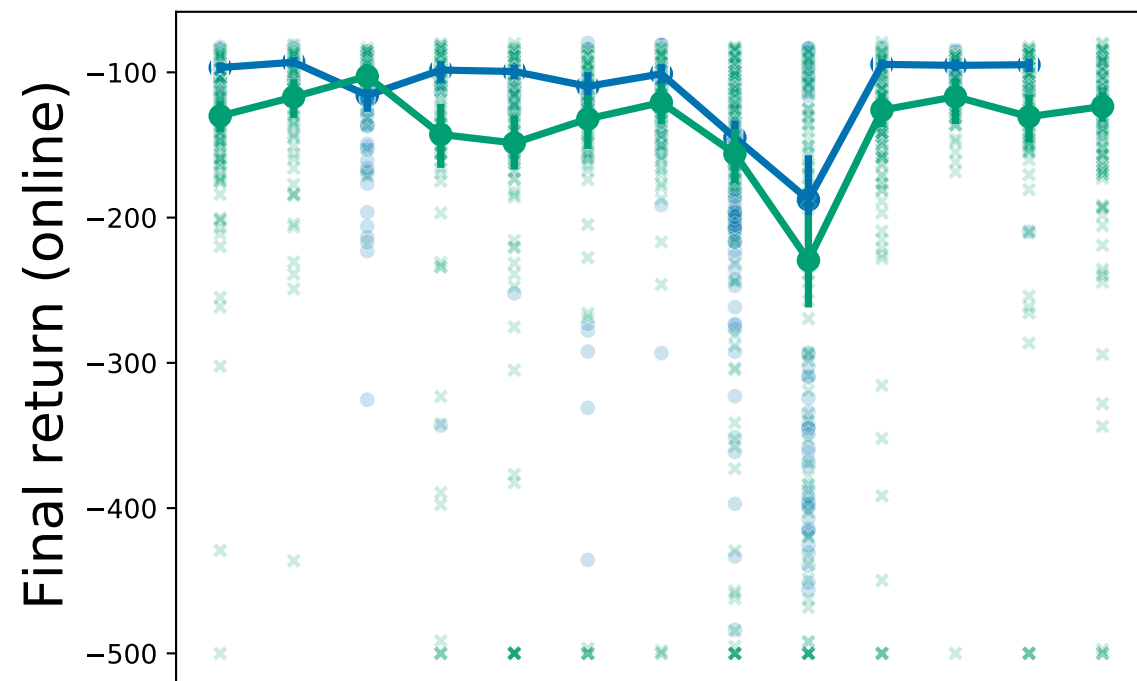

CartPole

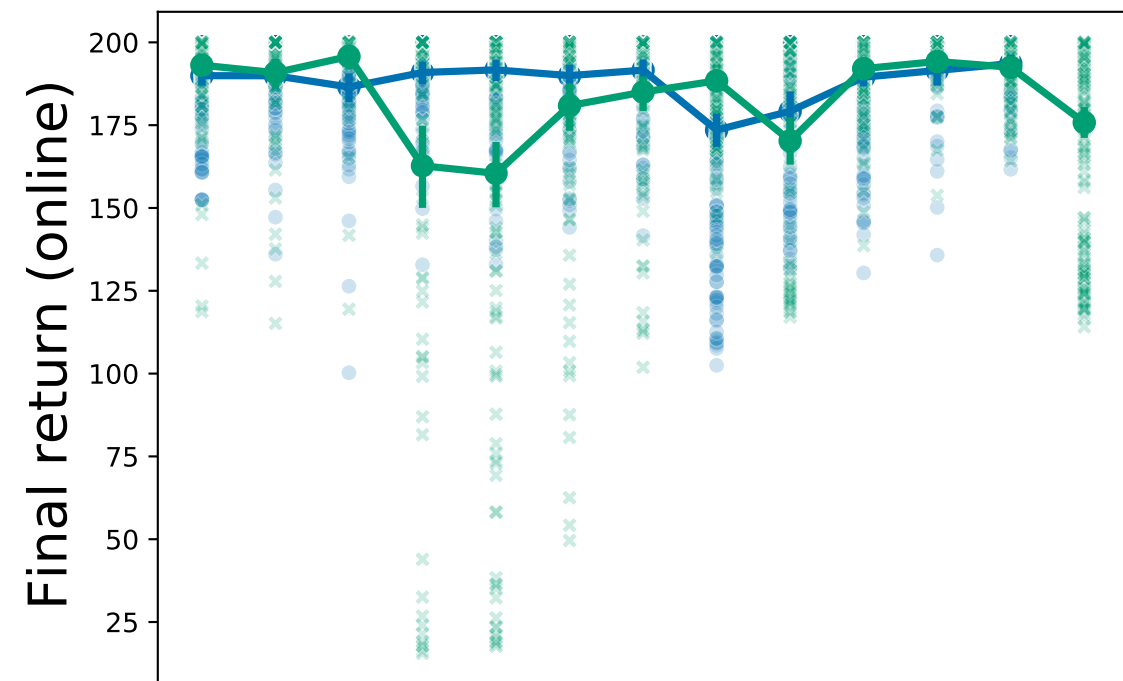

LunarLander

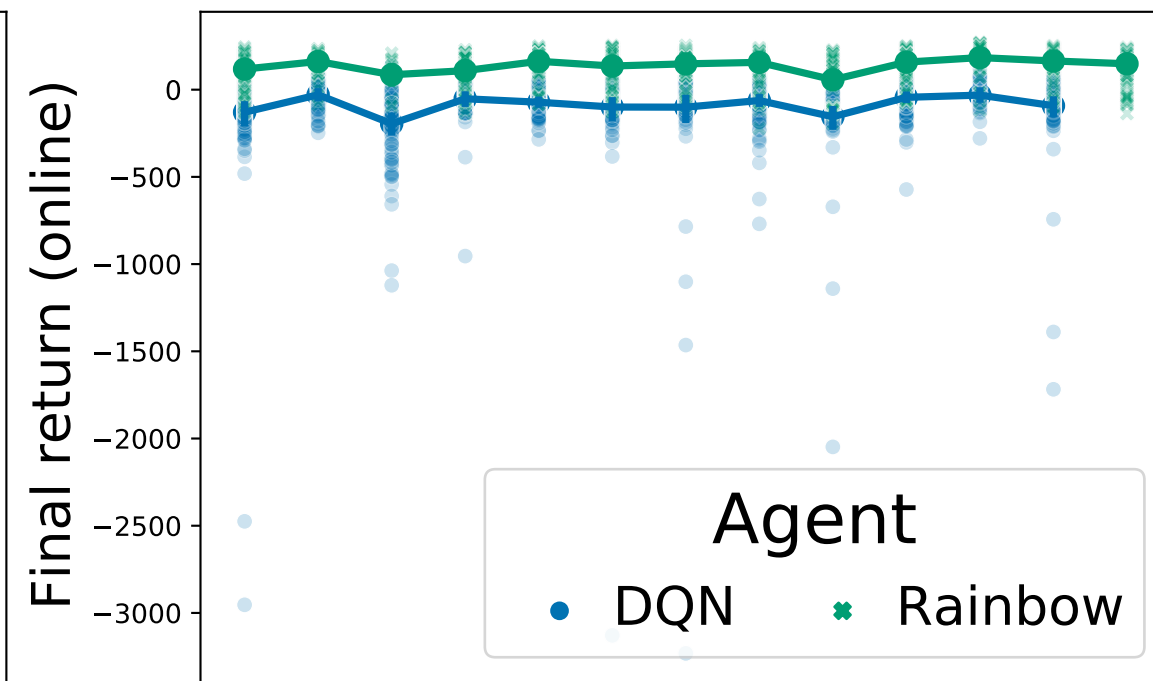

MountainCar

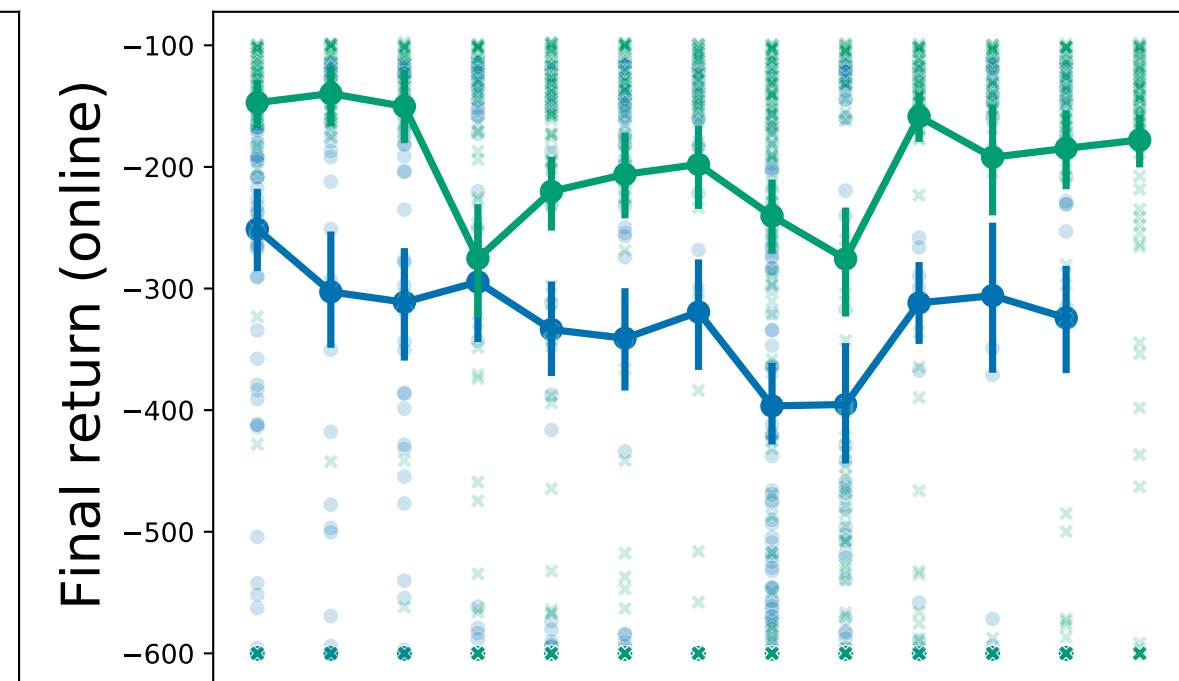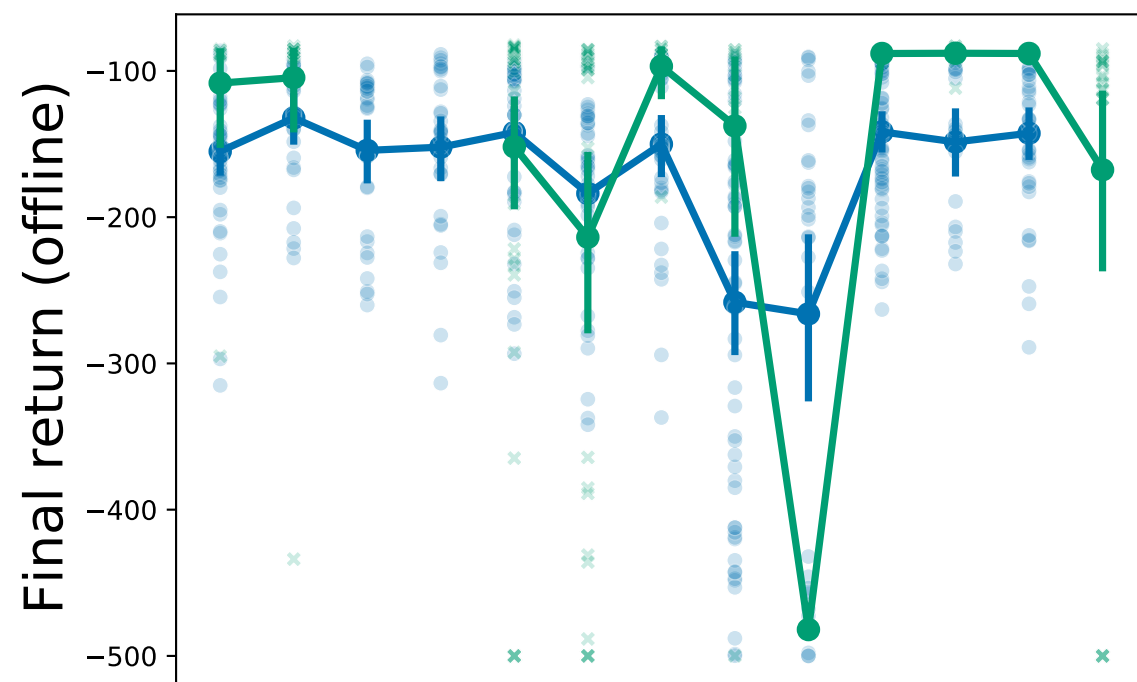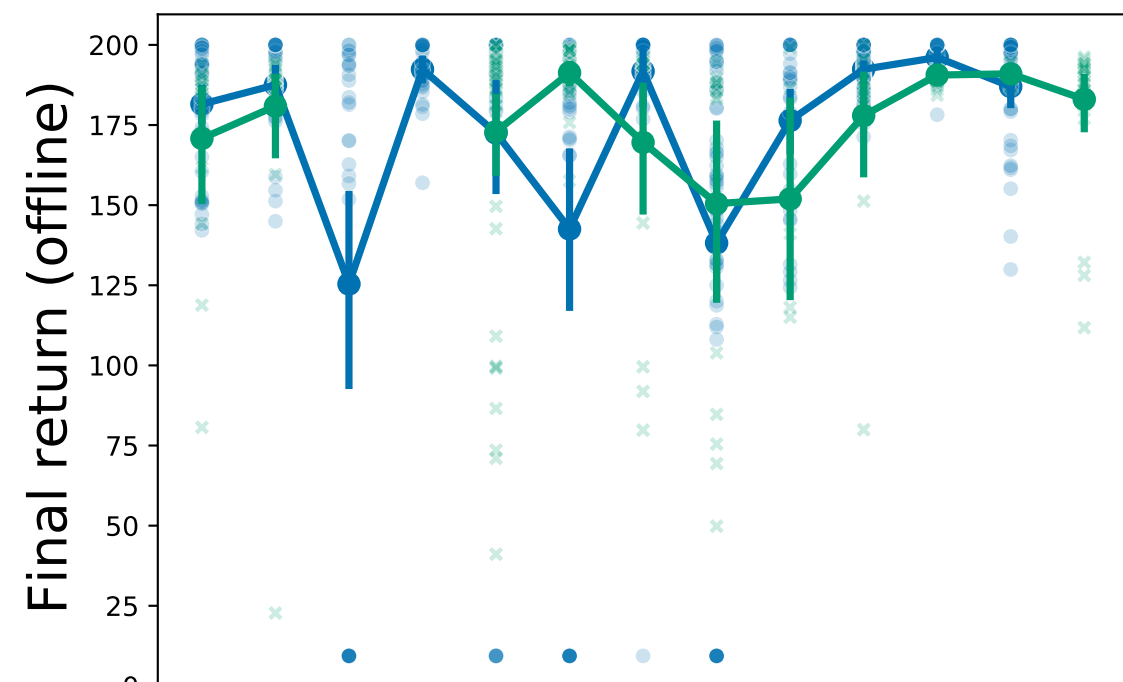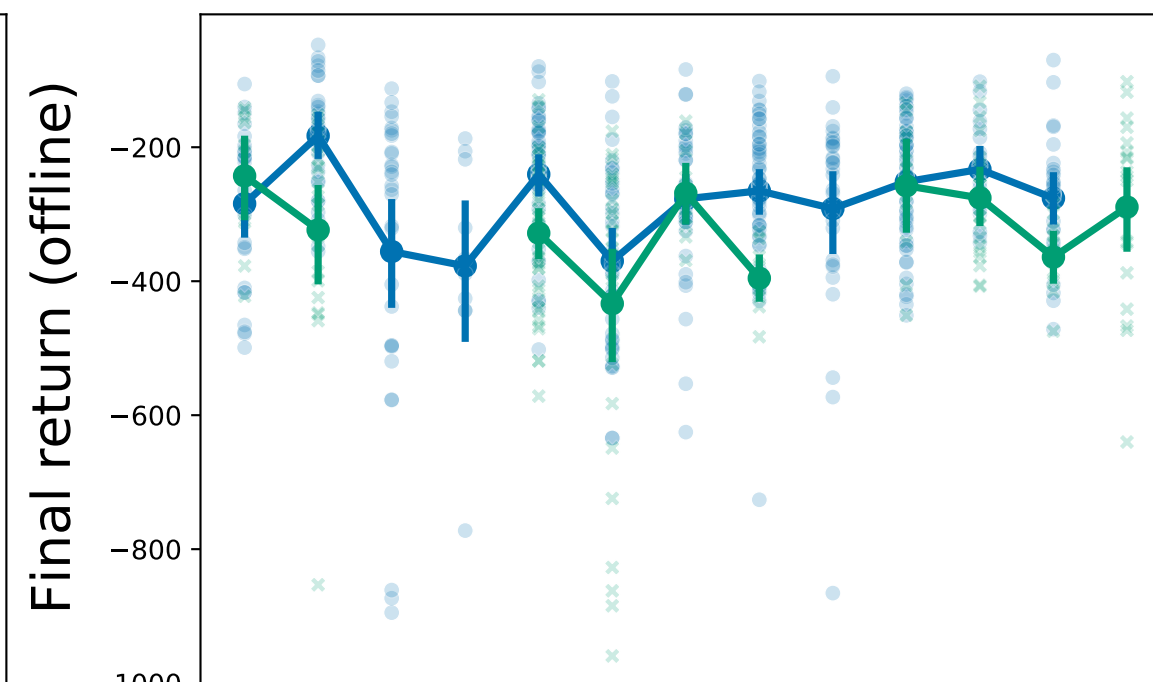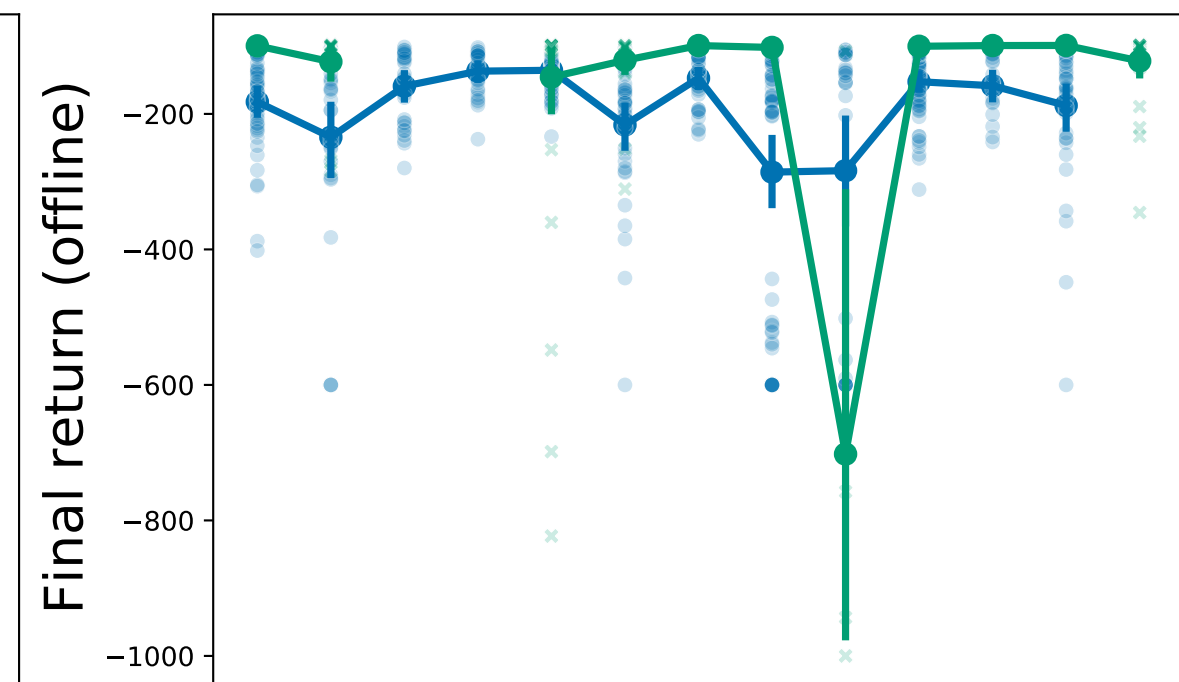

activation  
normalization  
learning\_rate  
epsilon  
width  
depth  
update\_period  
target\_update\_period  
gamma  
min\_replay\_history  
clip\_rewards  
num\_atoms

activation  
normalization  
learning\_rate  
epsilon  
width  
depth  
update\_period  
target\_update\_period  
gamma  
min\_replay\_history  
clip\_rewards  
num\_atoms

activation  
normalization  
learning\_rate  
epsilon  
width  
depth  
update\_period  
target\_update\_period  
gamma  
min\_replay\_history  
clip\_rewards  
num\_atoms

activation  
normalization  
learning\_rate  
epsilon  
width  
depth  
update\_period  
target\_update\_period  
gamma  
min\_replay\_history  
clip\_rewards  
num\_atoms
