# Supplementary material
Source: ML conference proceedings conference paper supplement (https://openreview.net/forum?id=Ws4v7nSqqb)

Acrobot (online)

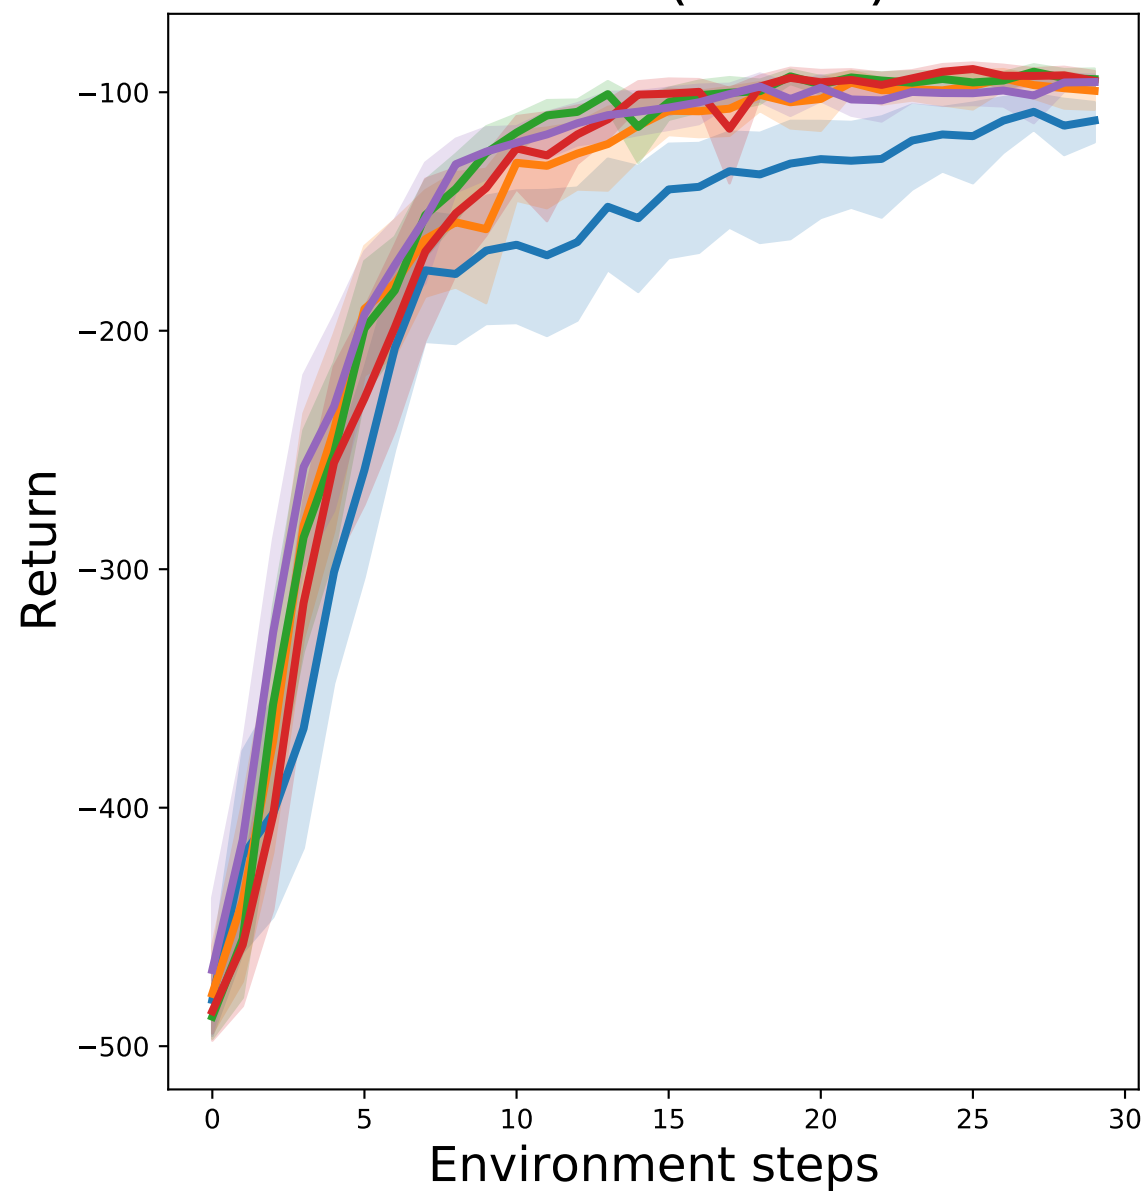

CartPole (online)

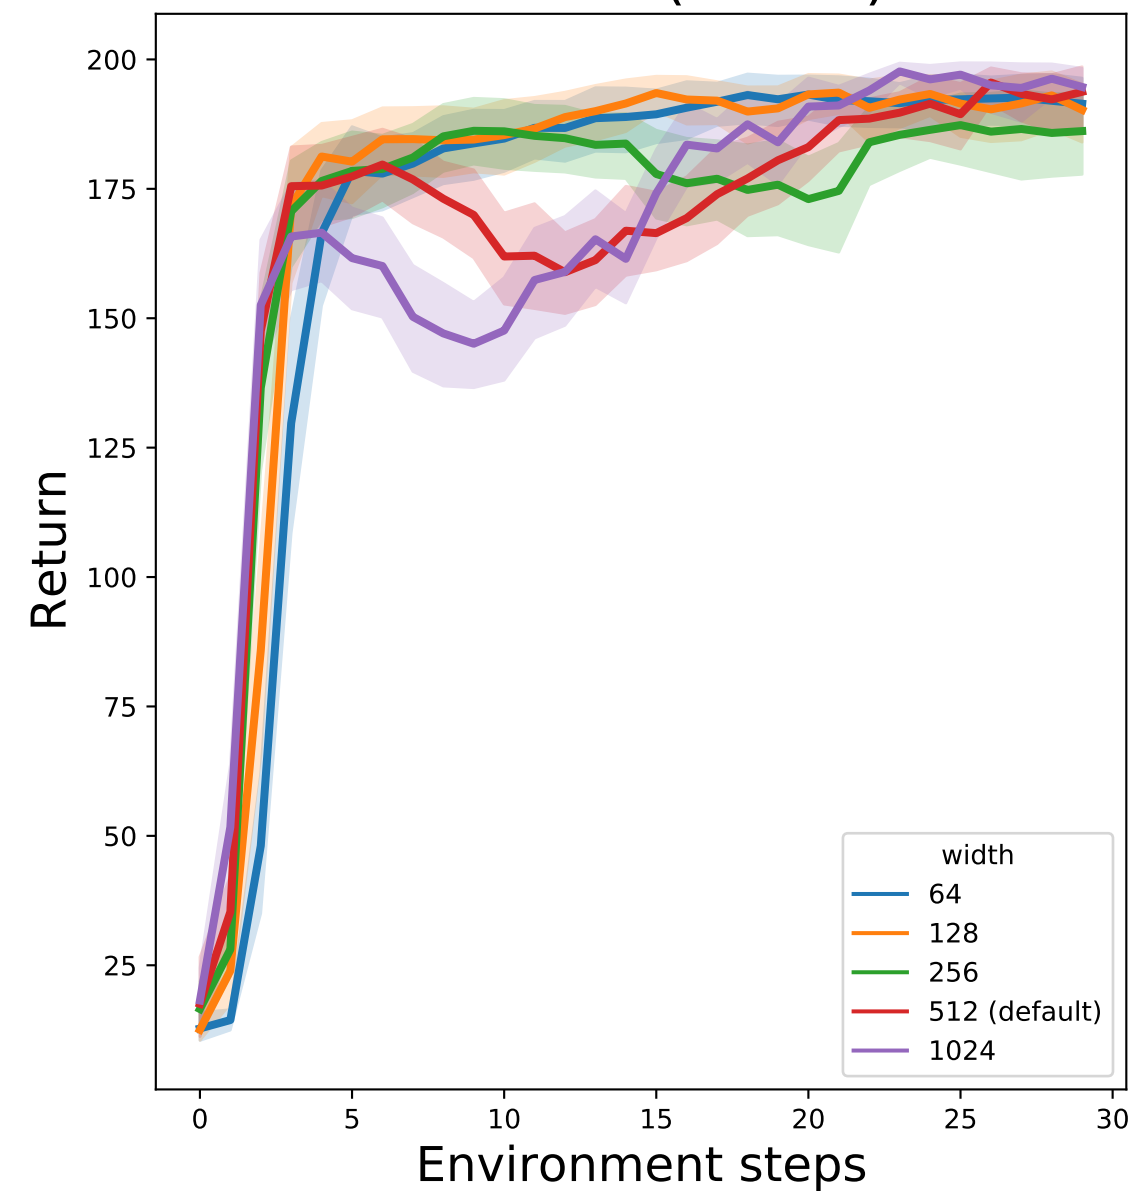

LunarLander (online)

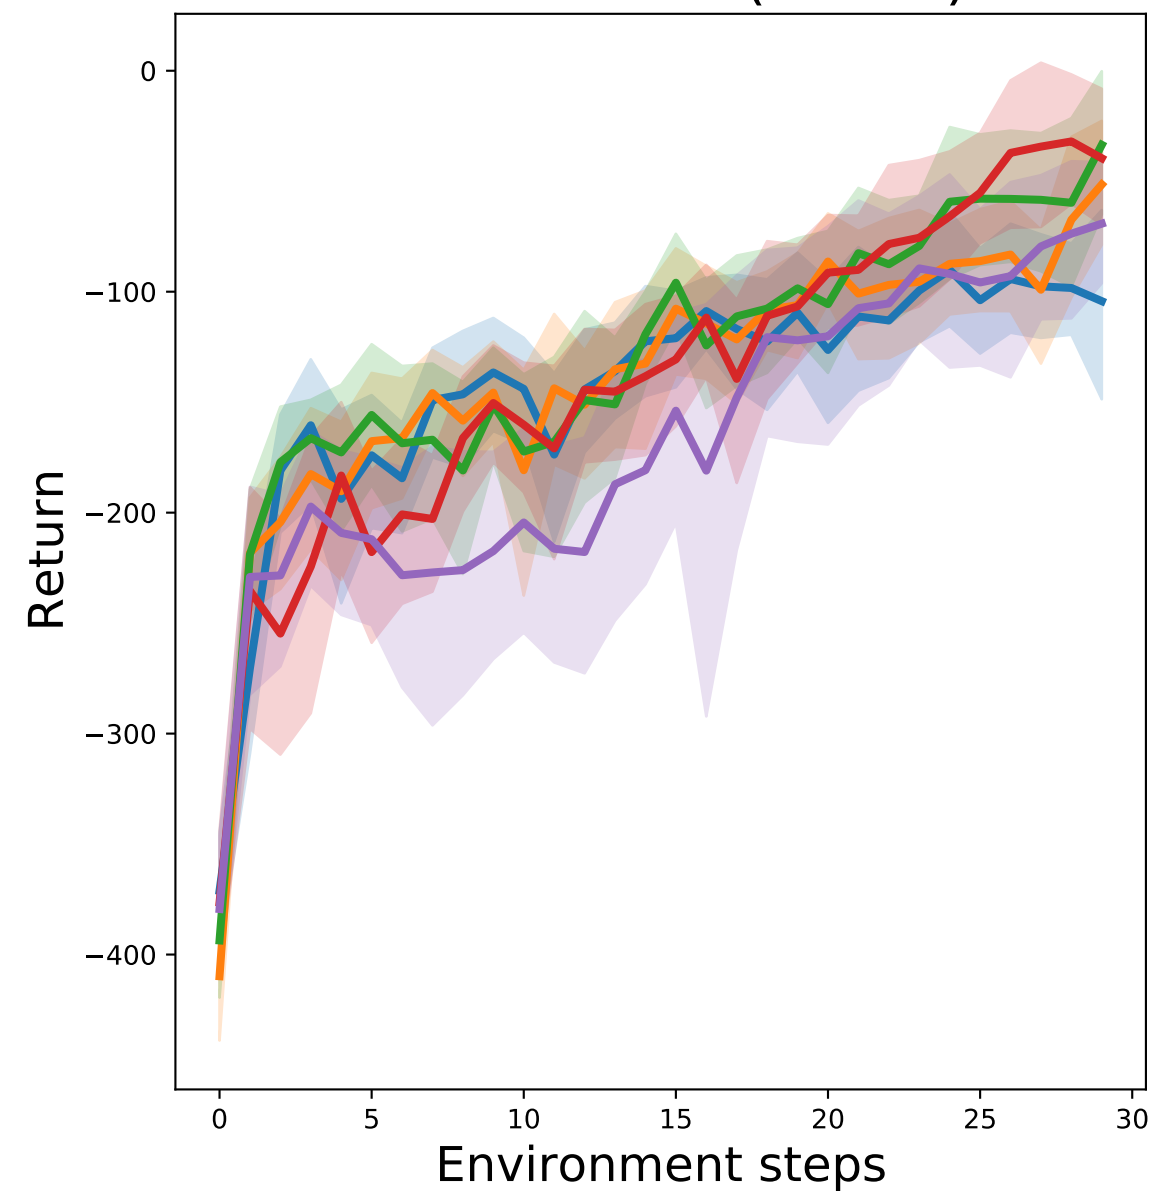

MountainCar (online)

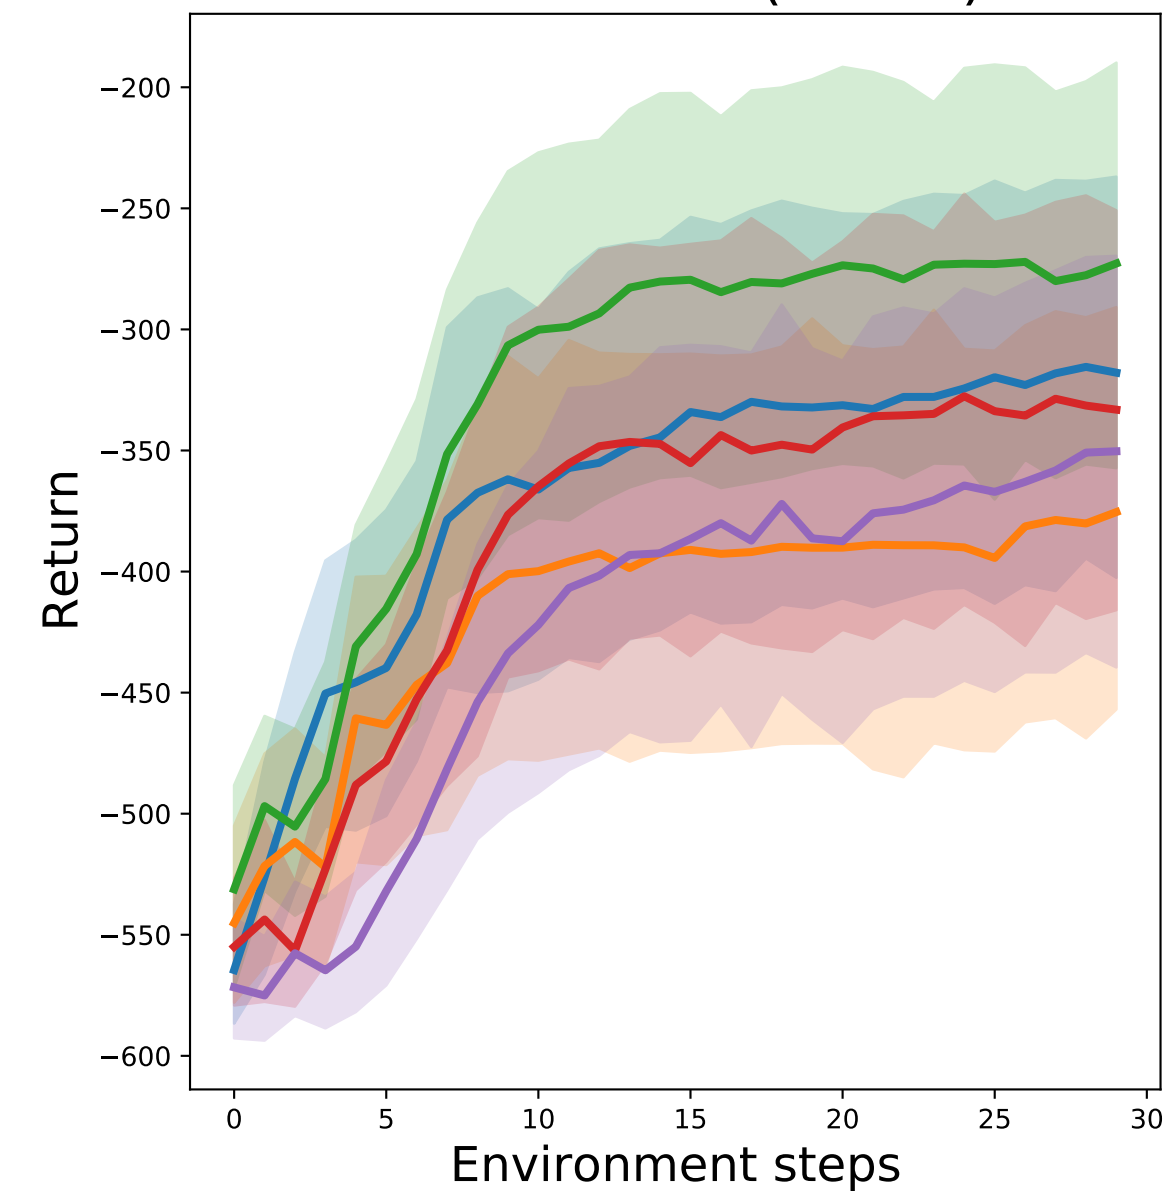

Acrobot (online)

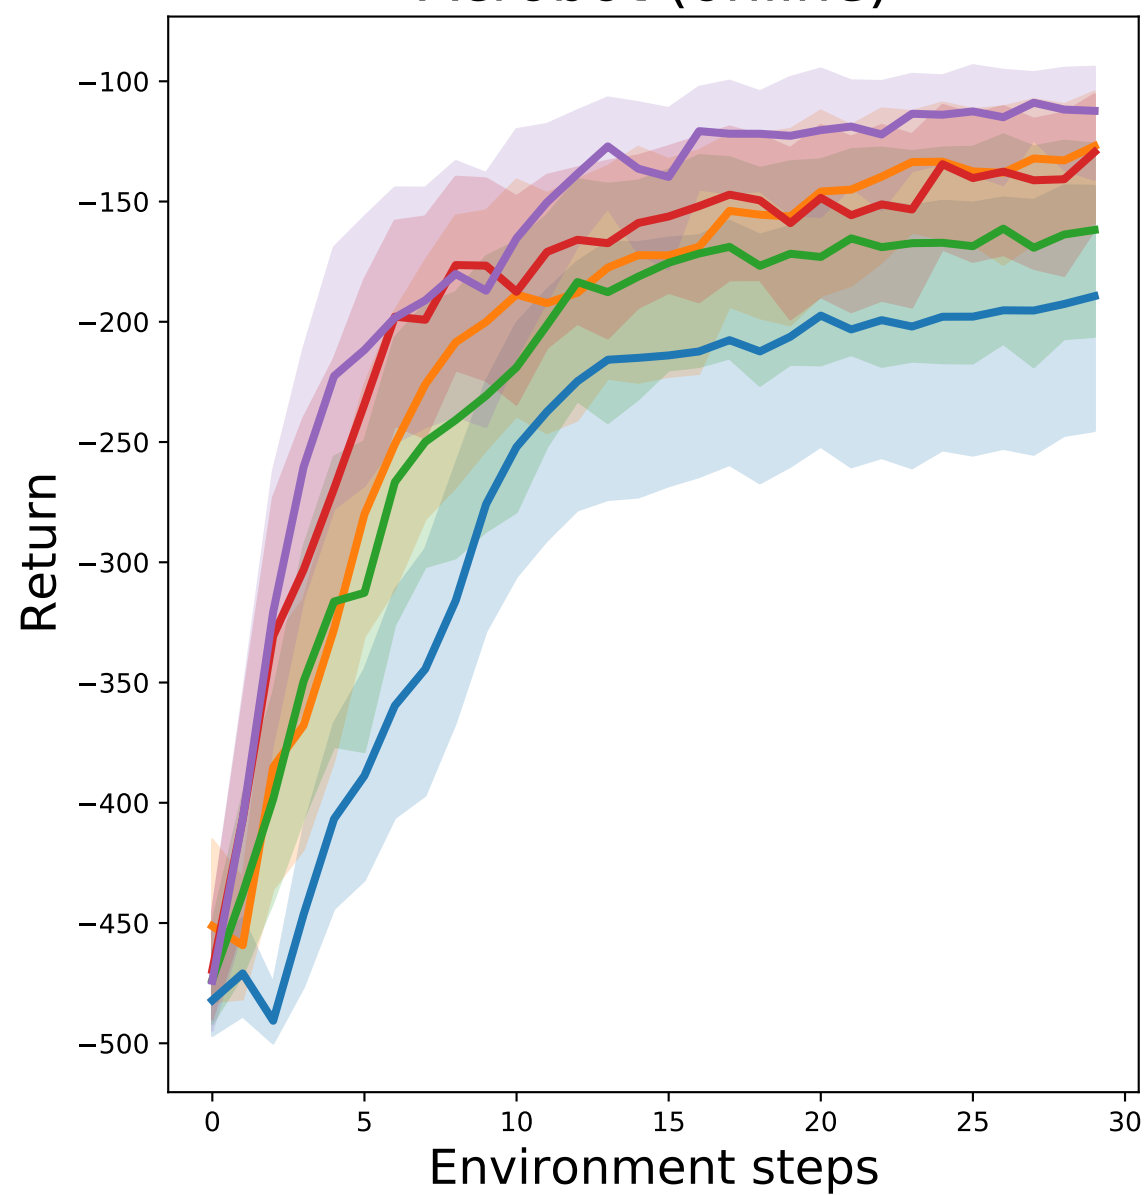

CartPole (online)

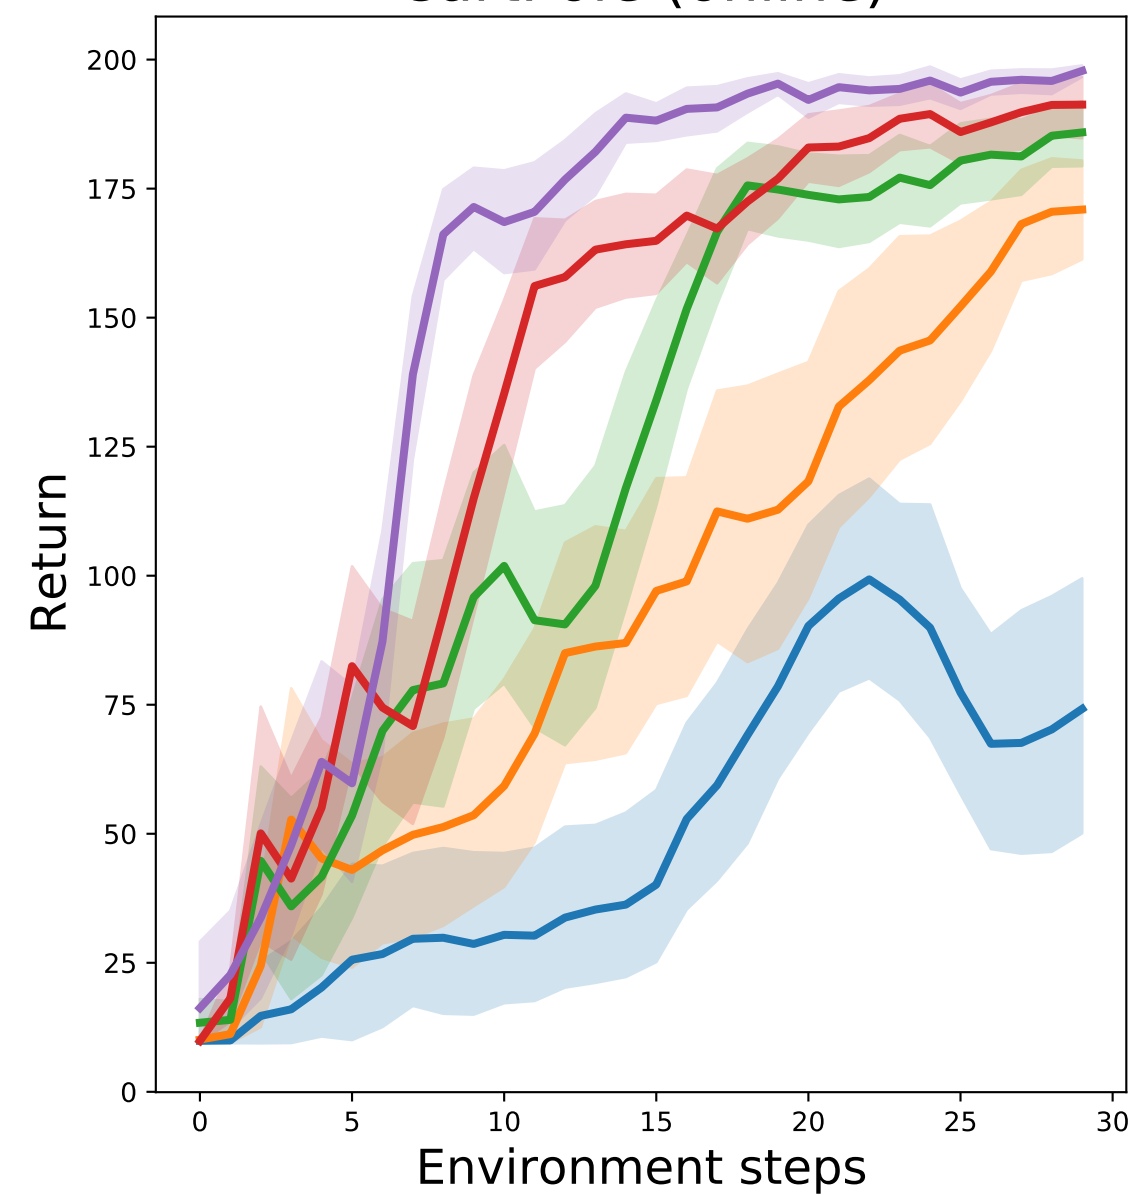

LunarLander (online)

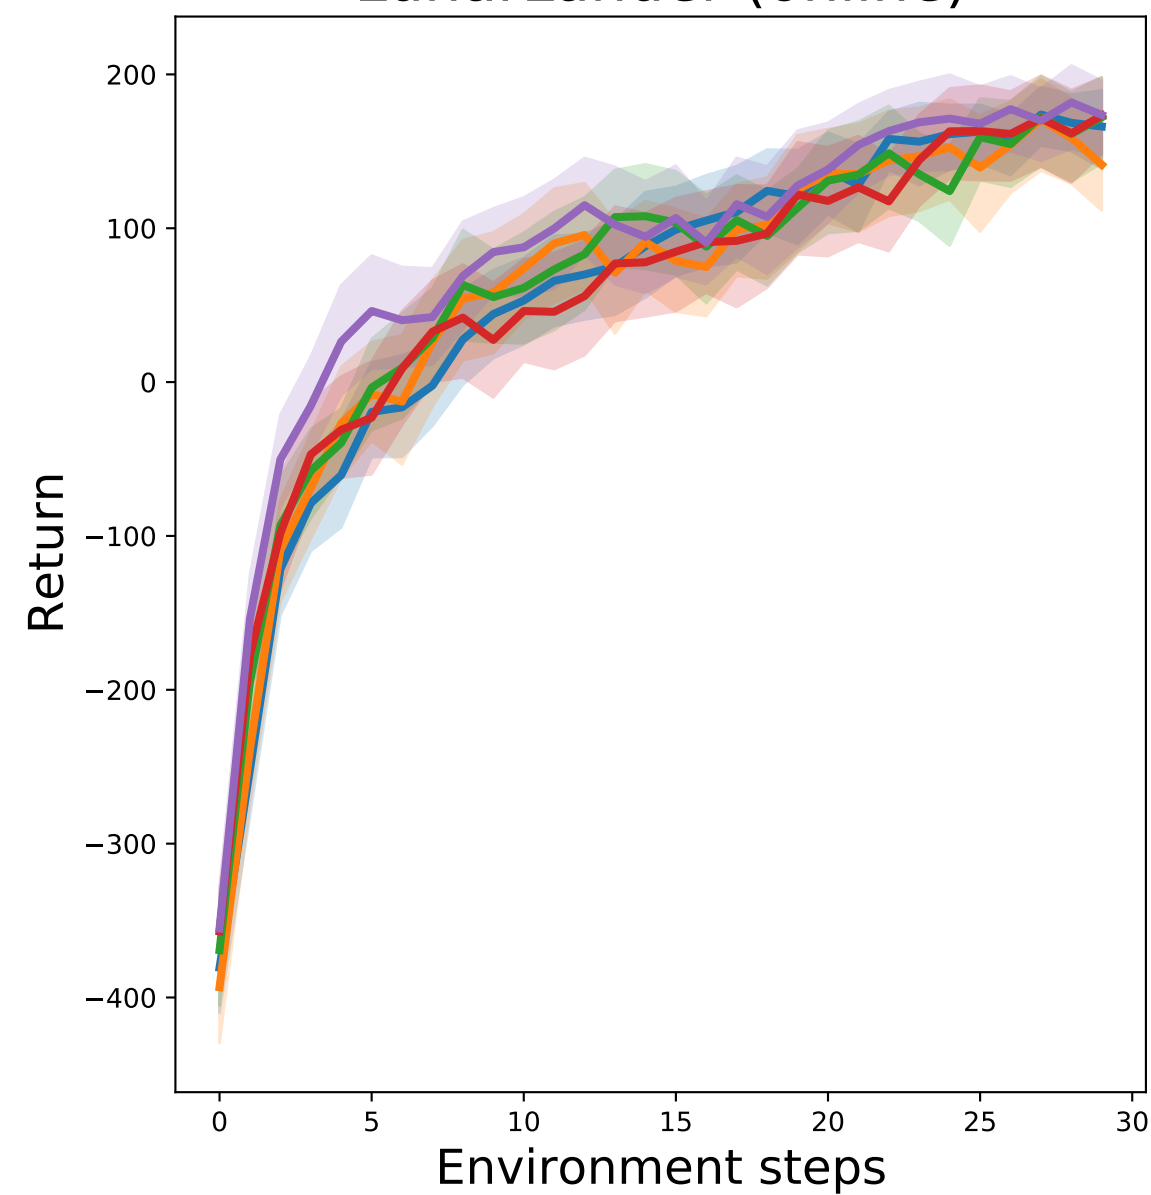

MountainCar (online)

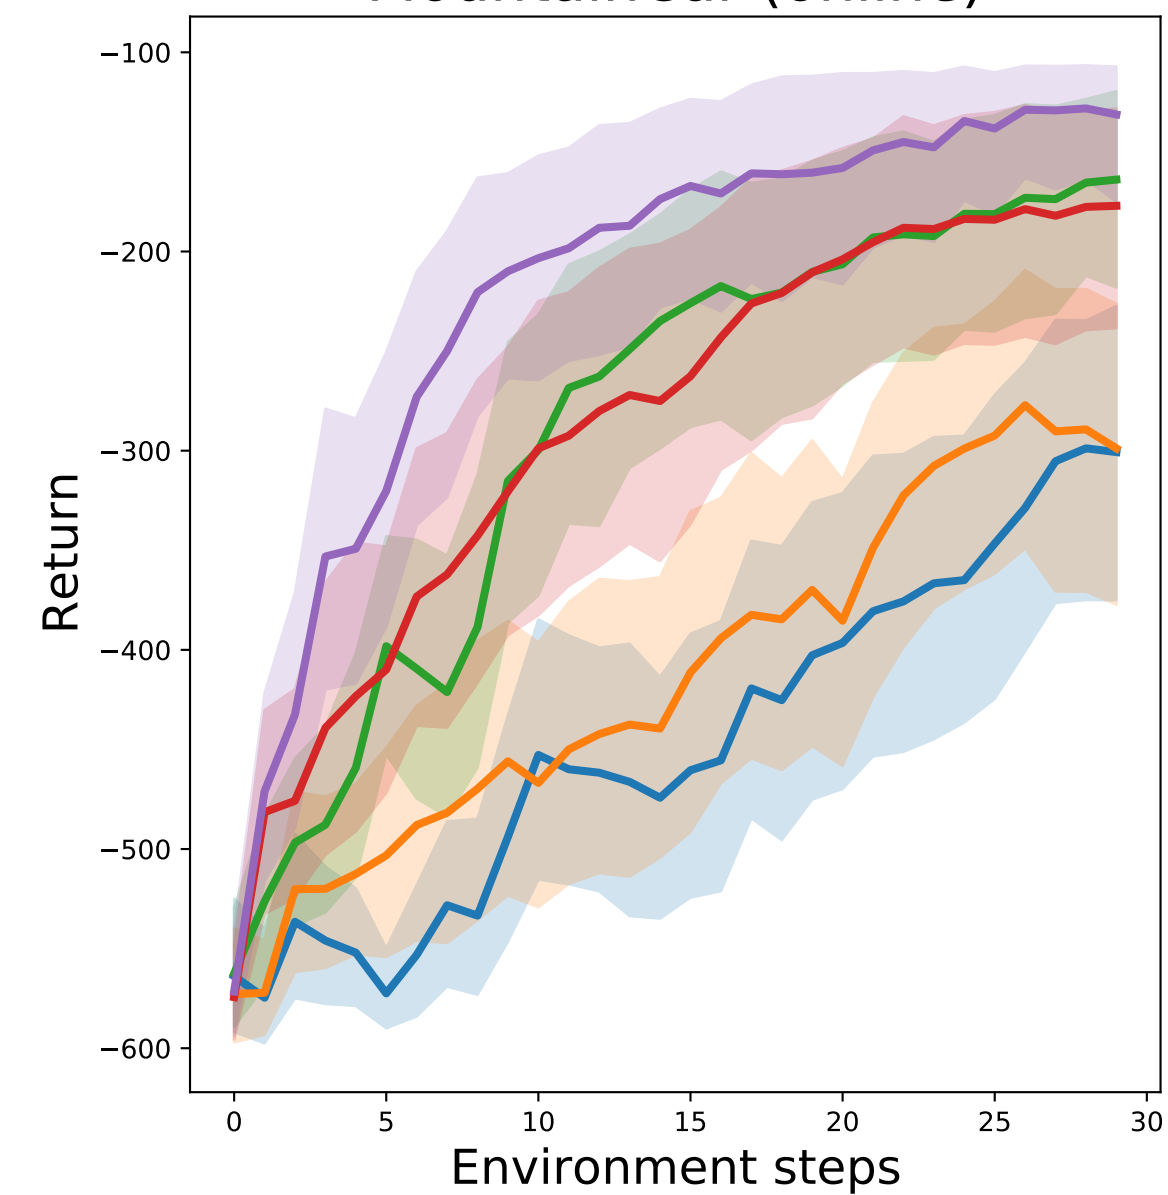

Supplement: supplementary_material [file attachment]
