# Supplementary material
Source: ML conference proceedings conference paper supplement (https://openreview.net/forum?id=Ws4v7nSqqb)
Supplement: supplementary_material [file attachment]

Acrobot

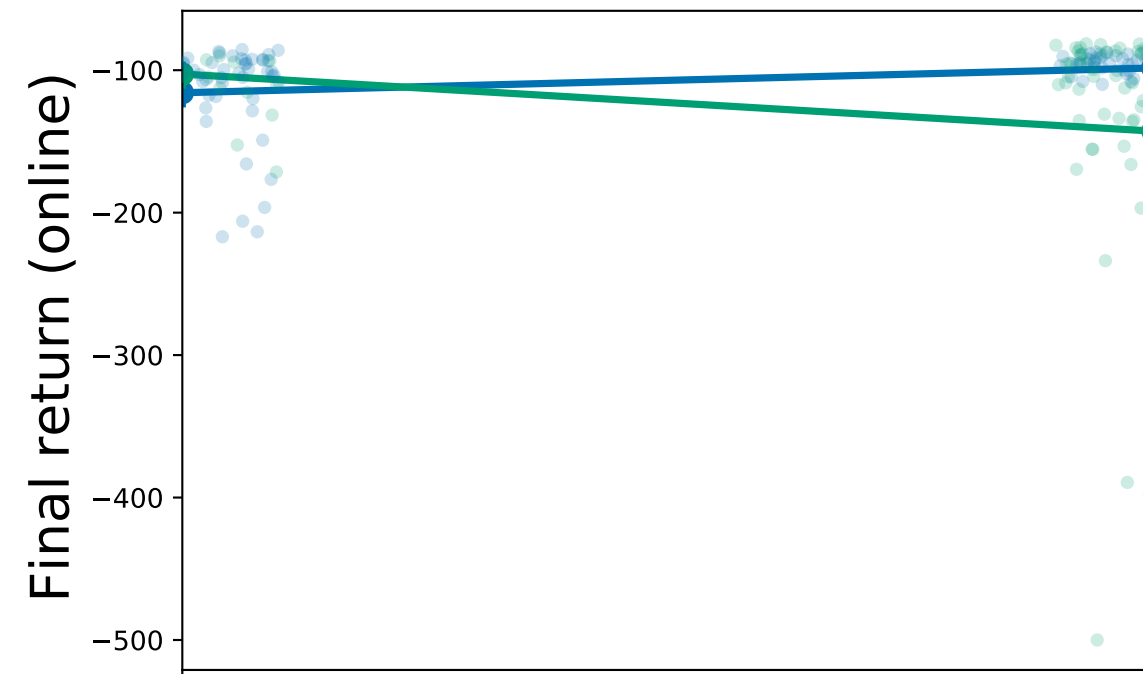

CartPole

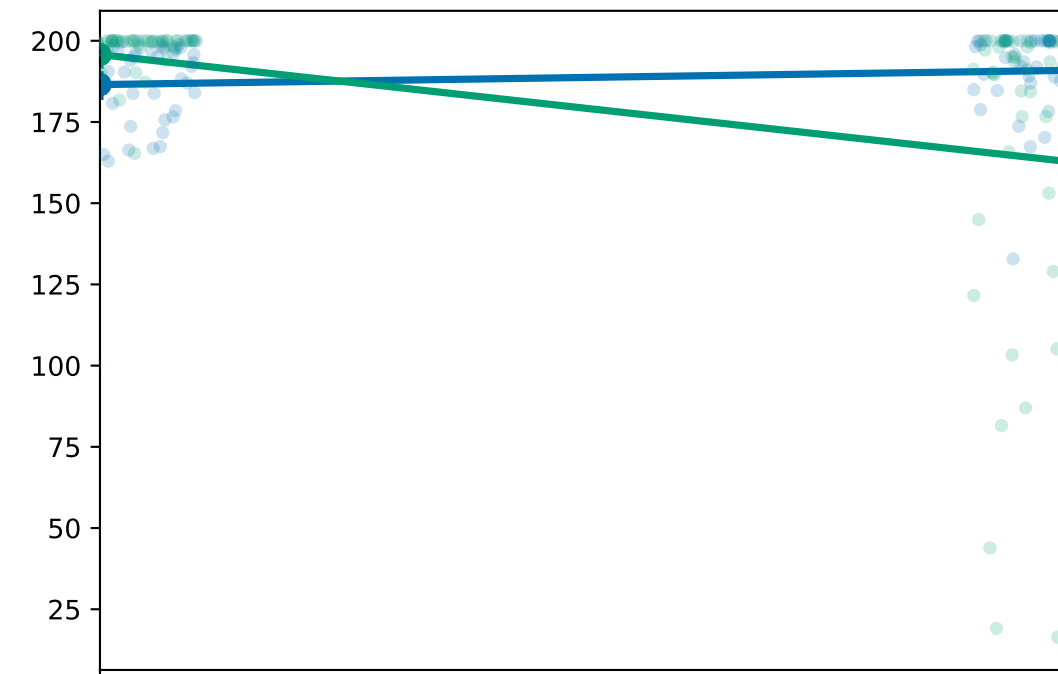

LunarLander

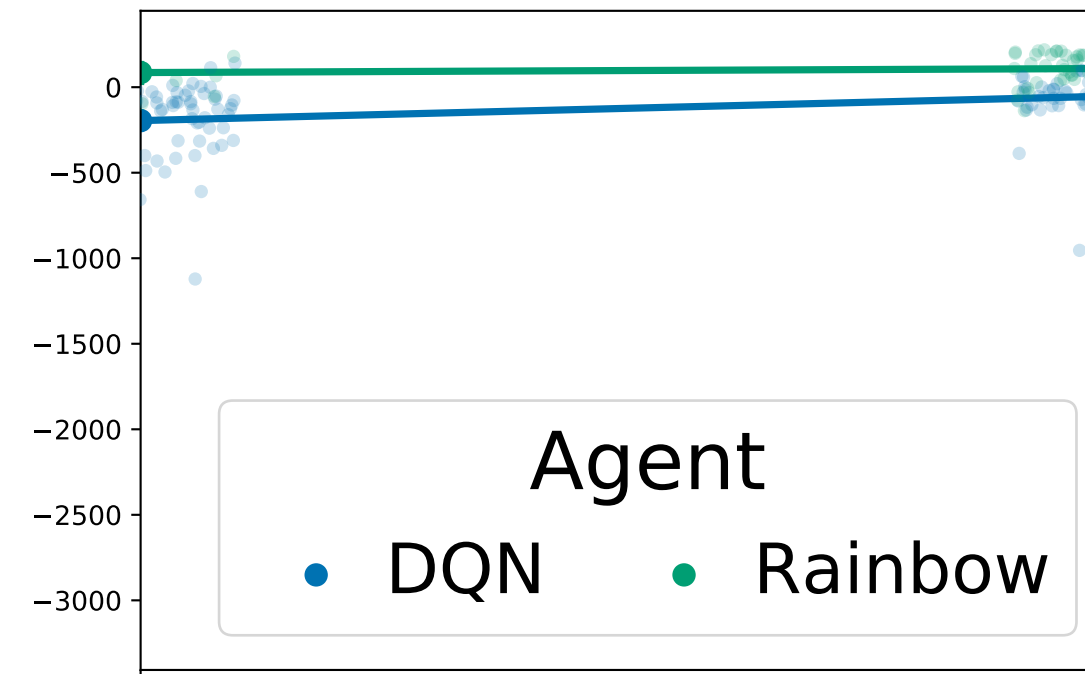

MountainCar

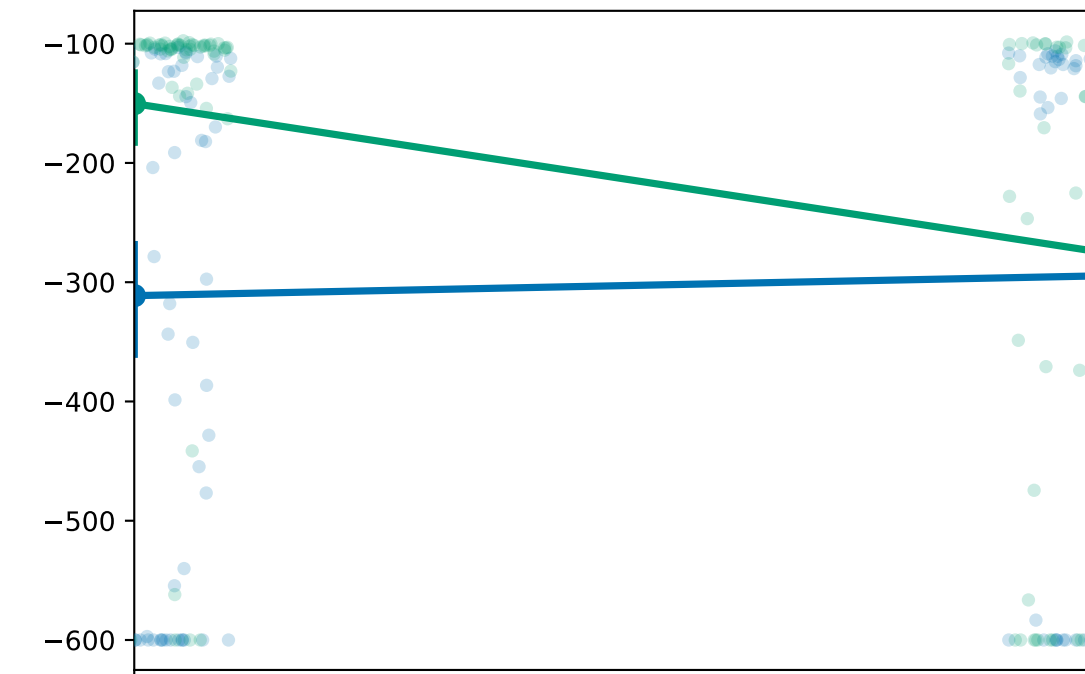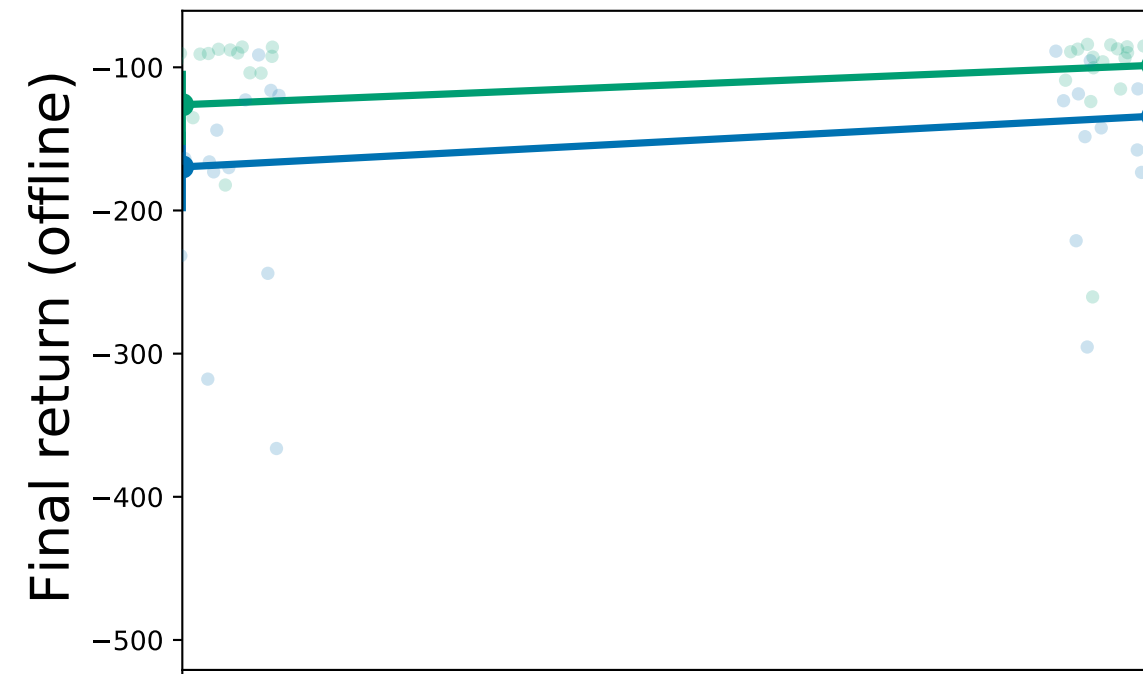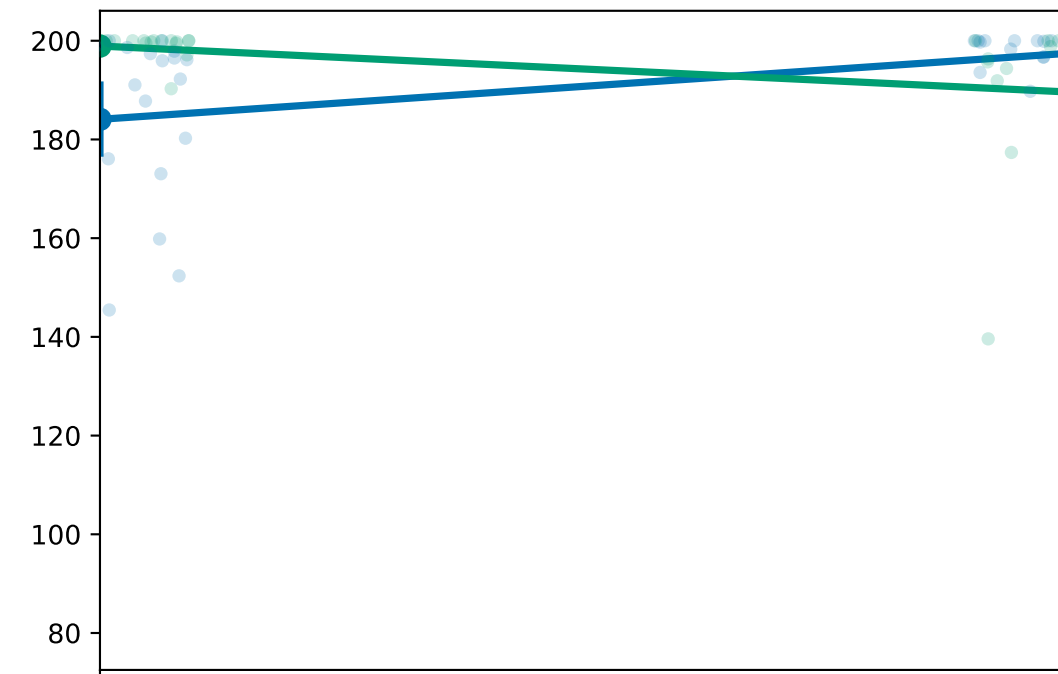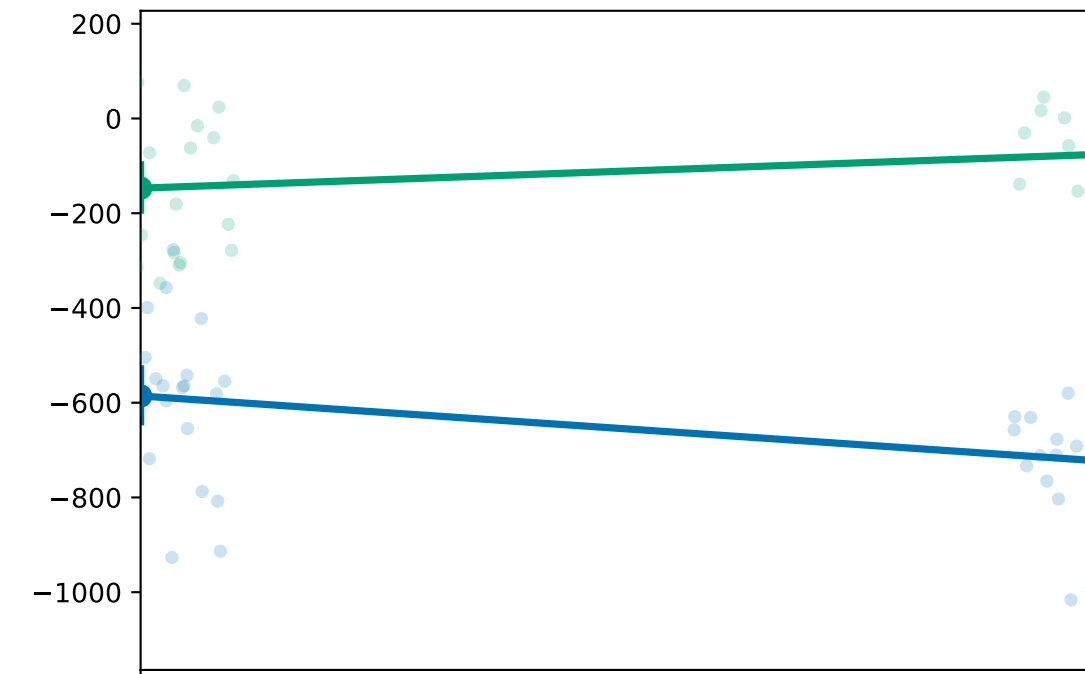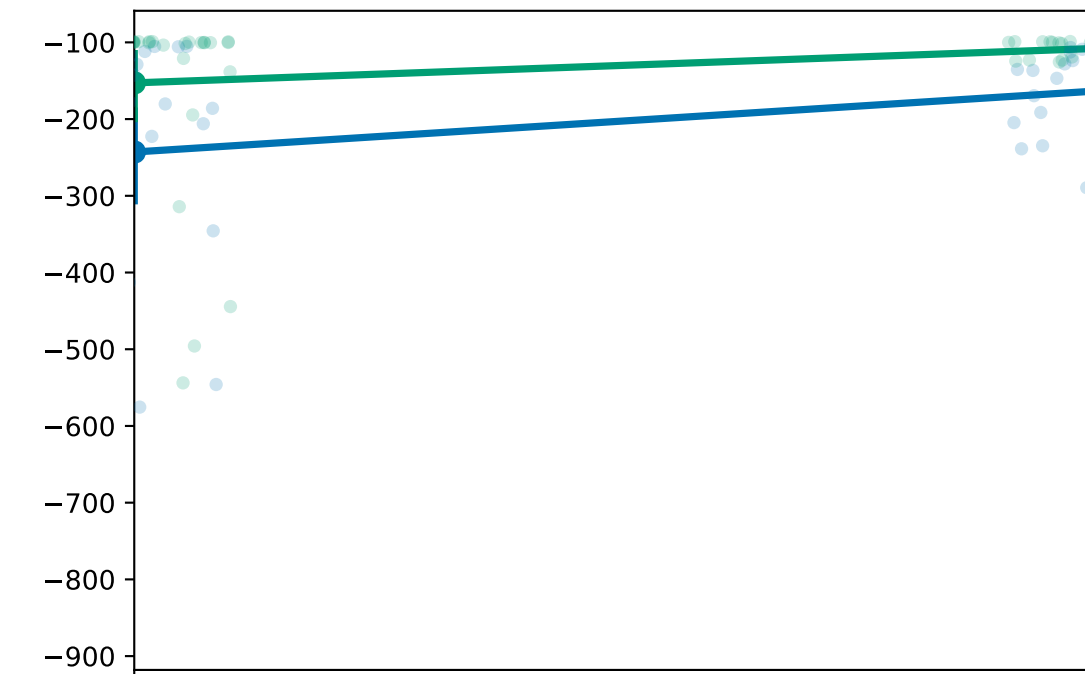

learning\_rate

epsilon

learning\_rate

epsilon

learning\_rate

epsilon

learning\_rate

epsilon
