# Supplementary material
Source: ML conference proceedings conference paper supplement (https://openreview.net/forum?id=Ws4v7nSqqb)

Acrobot

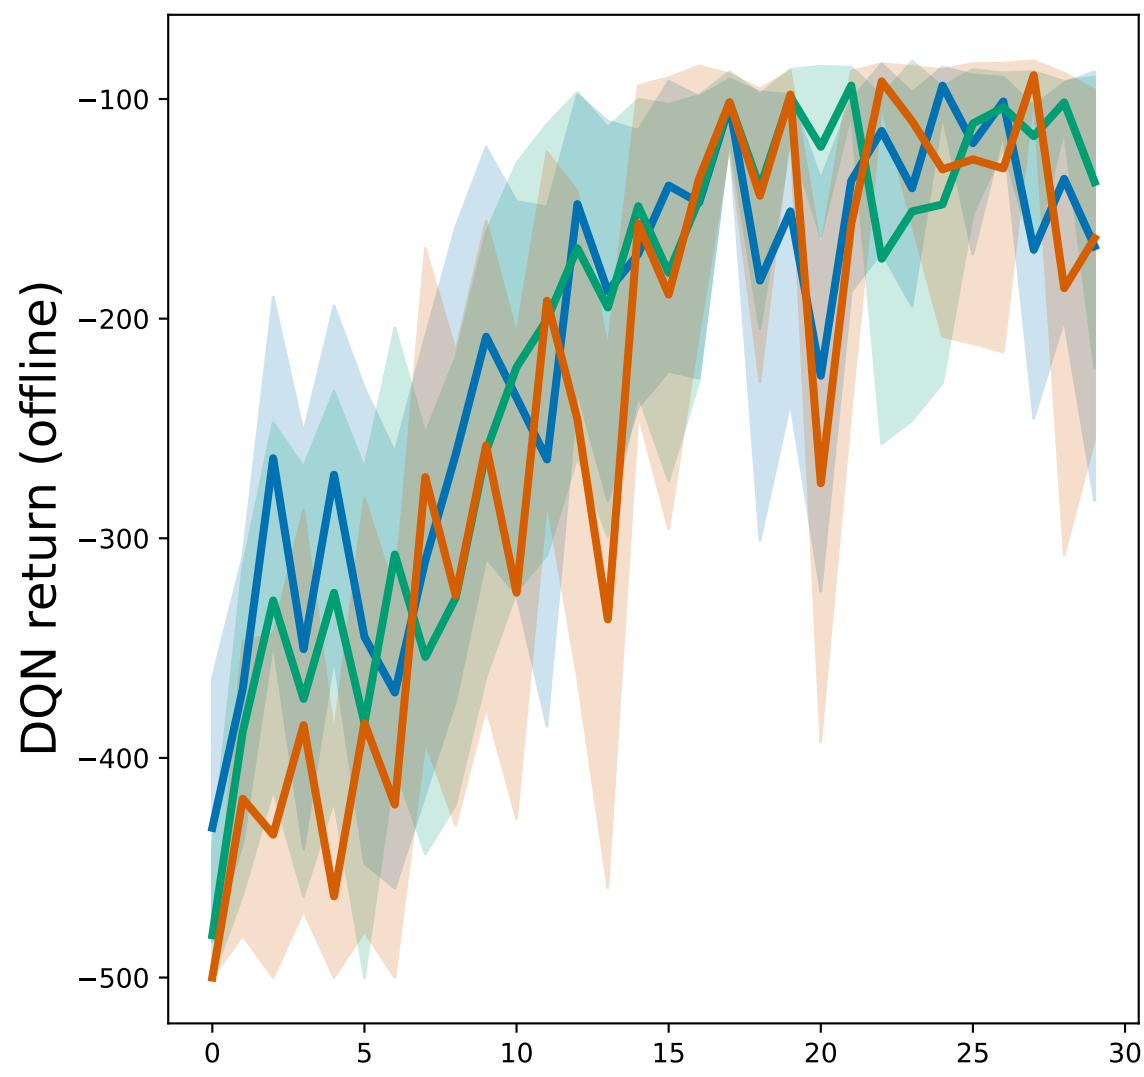

CartPole

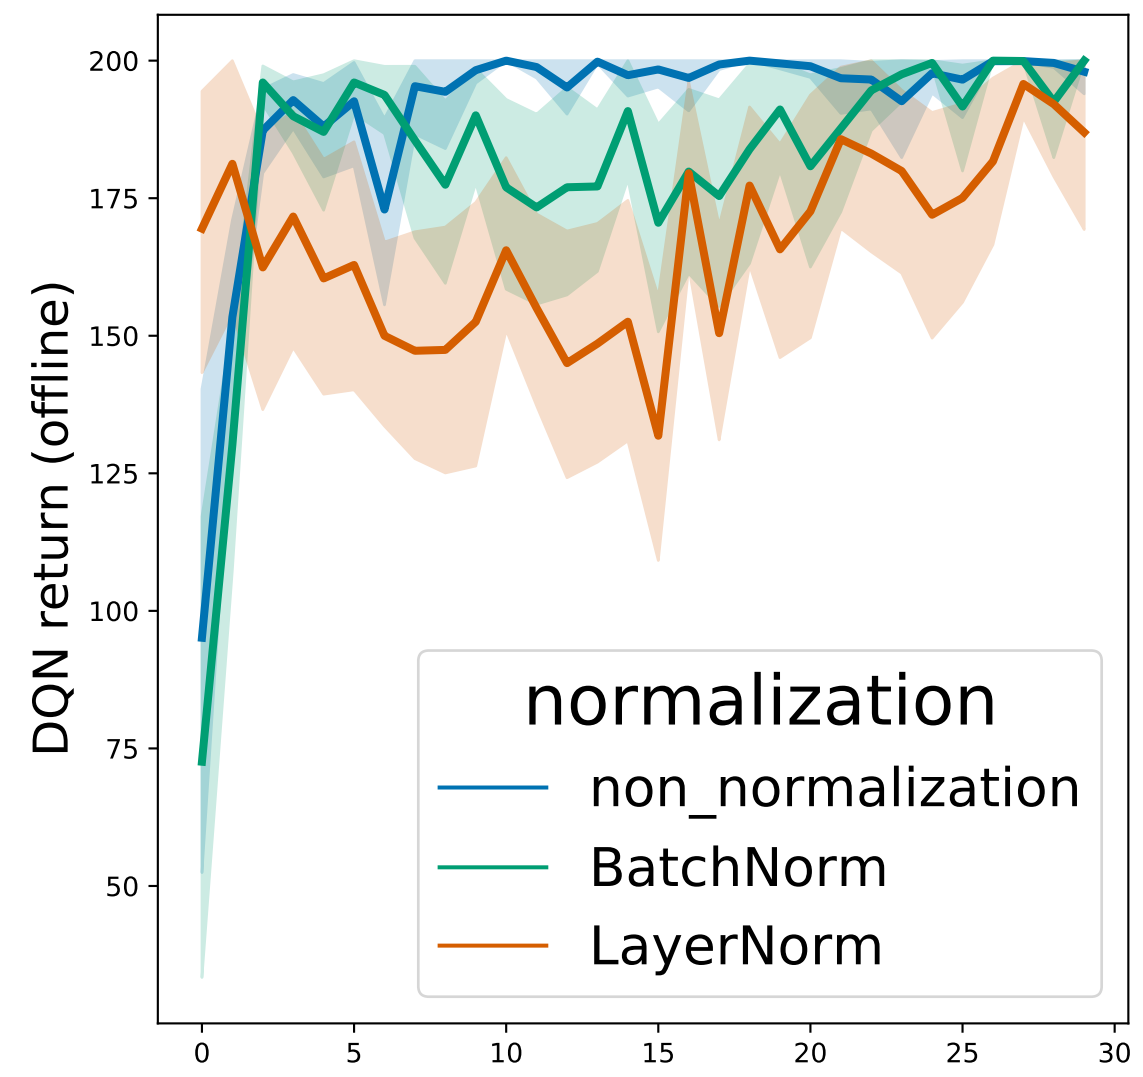

LunarLander

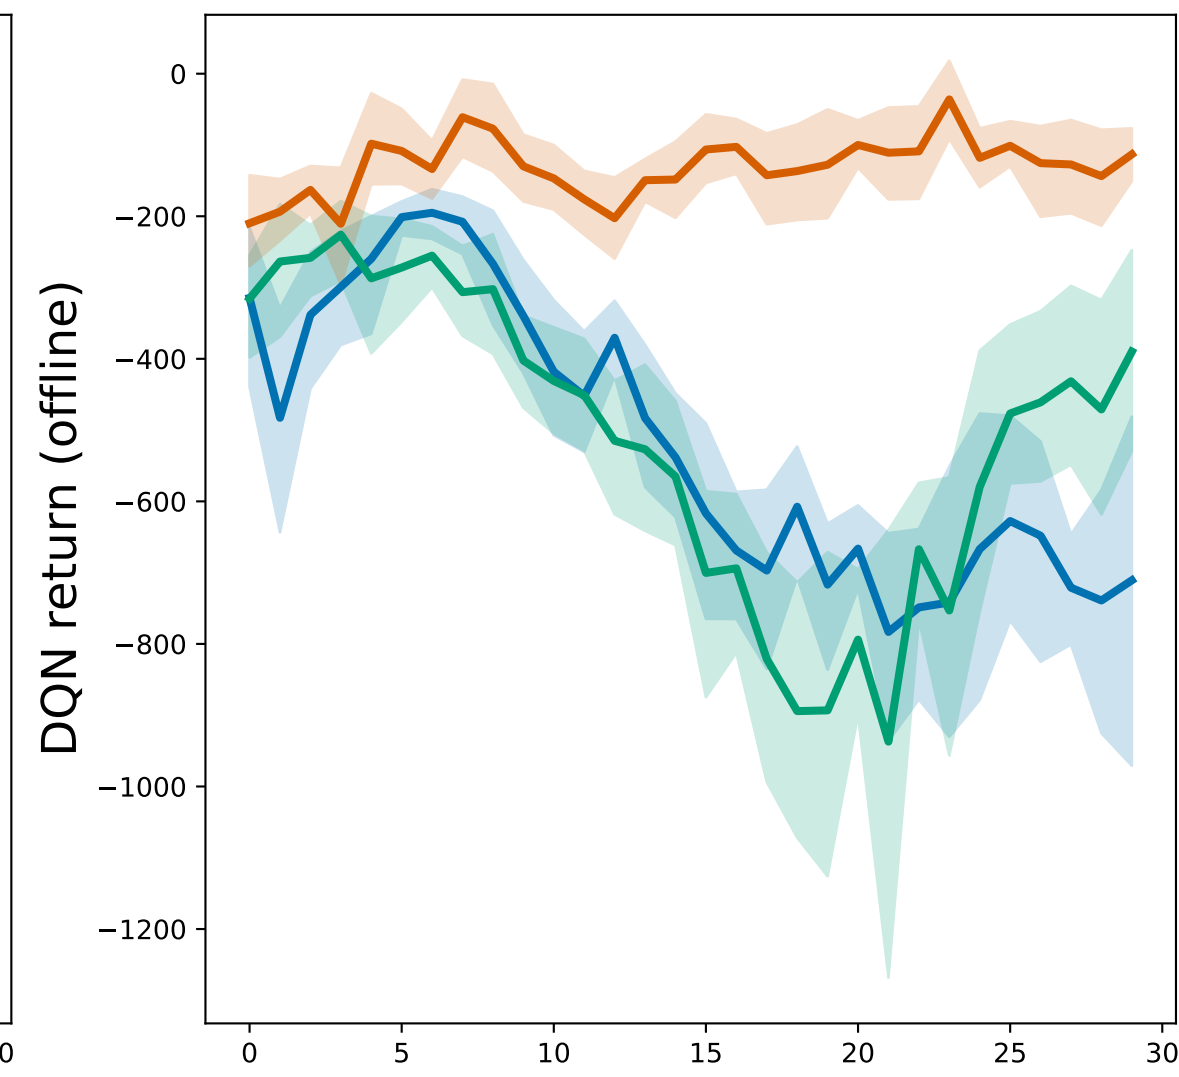

MountainCar

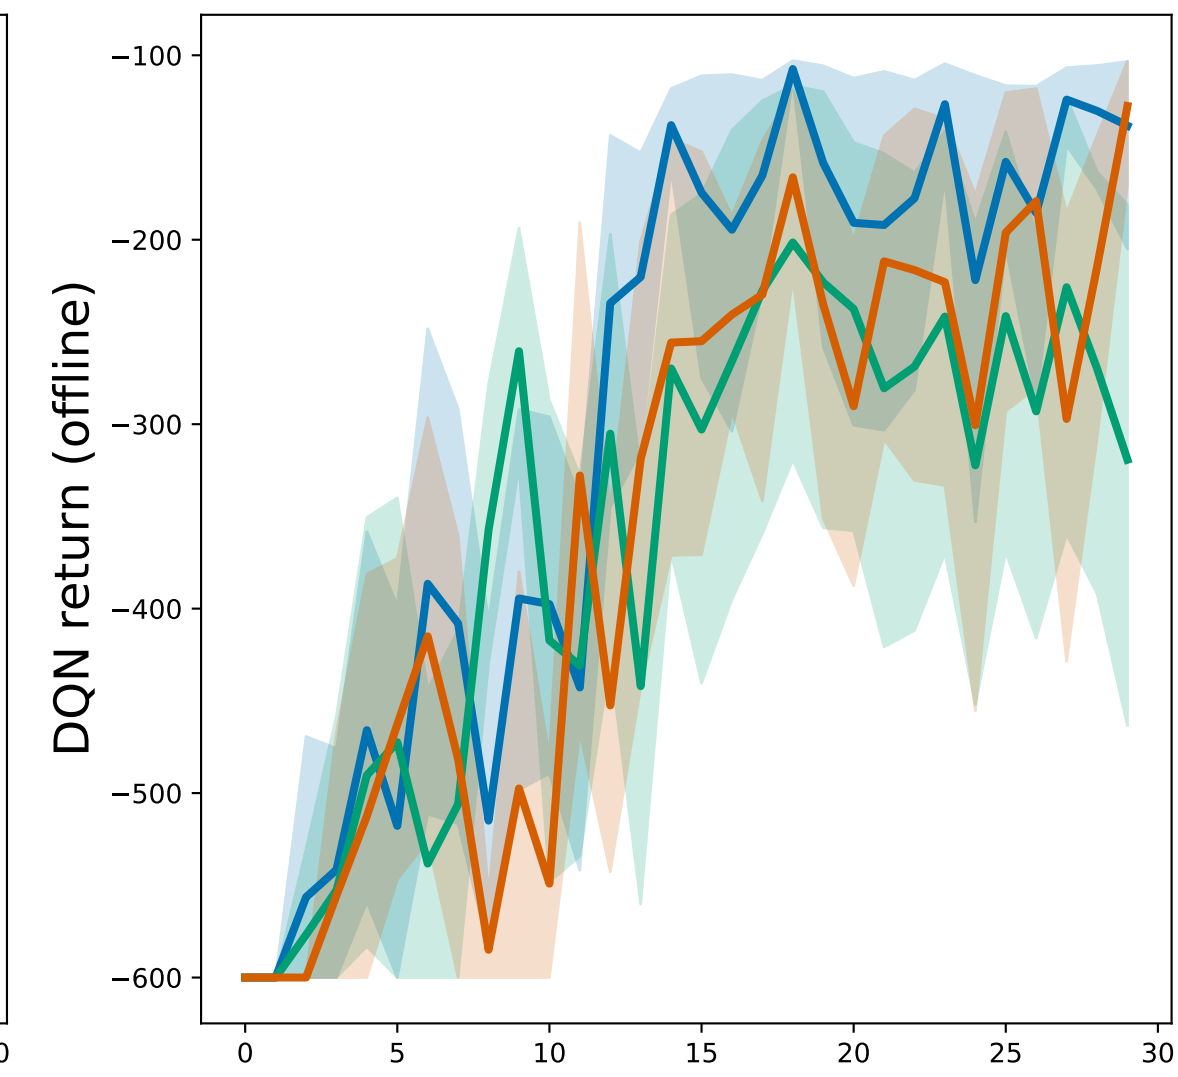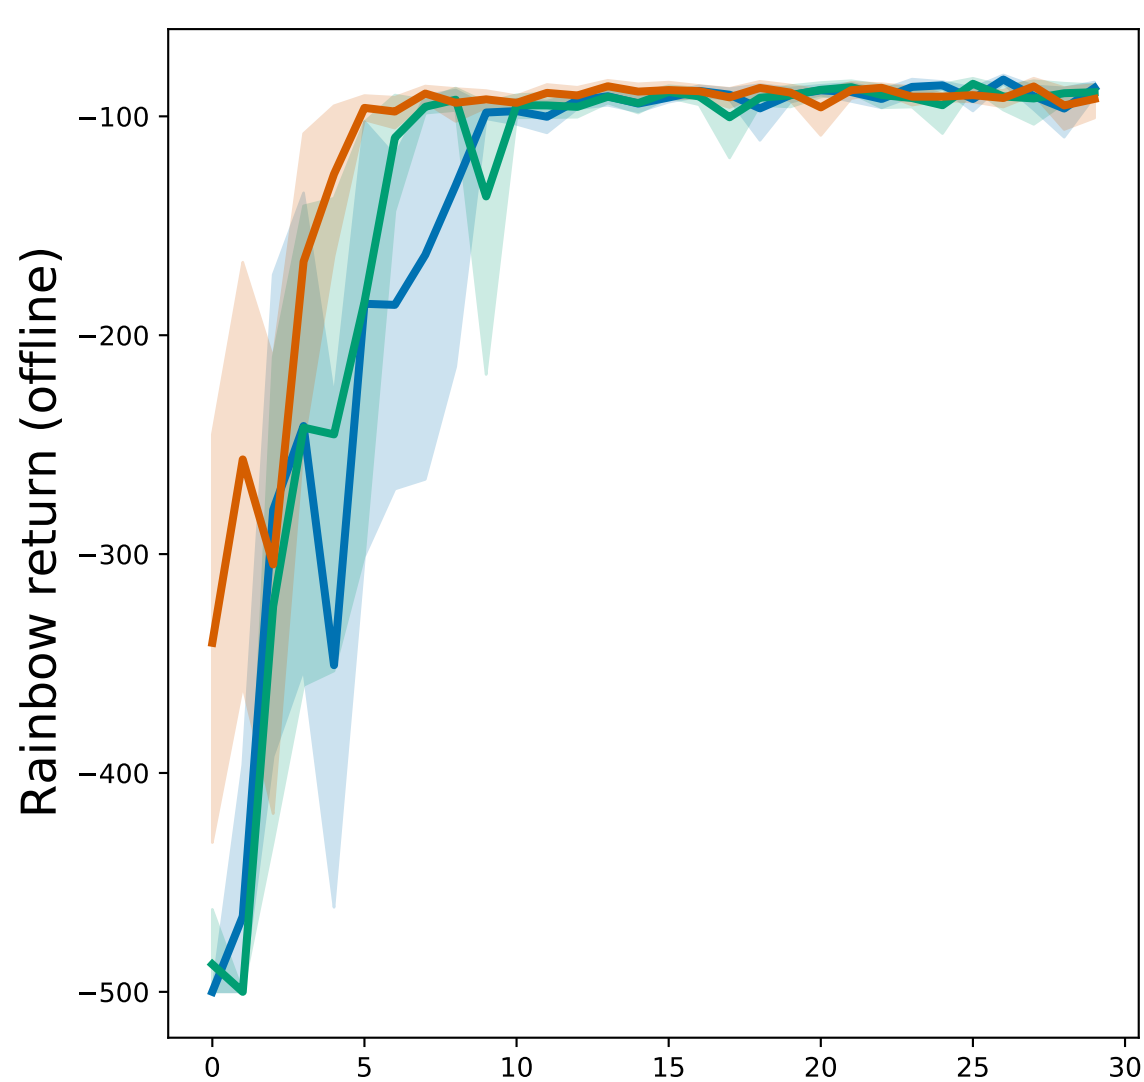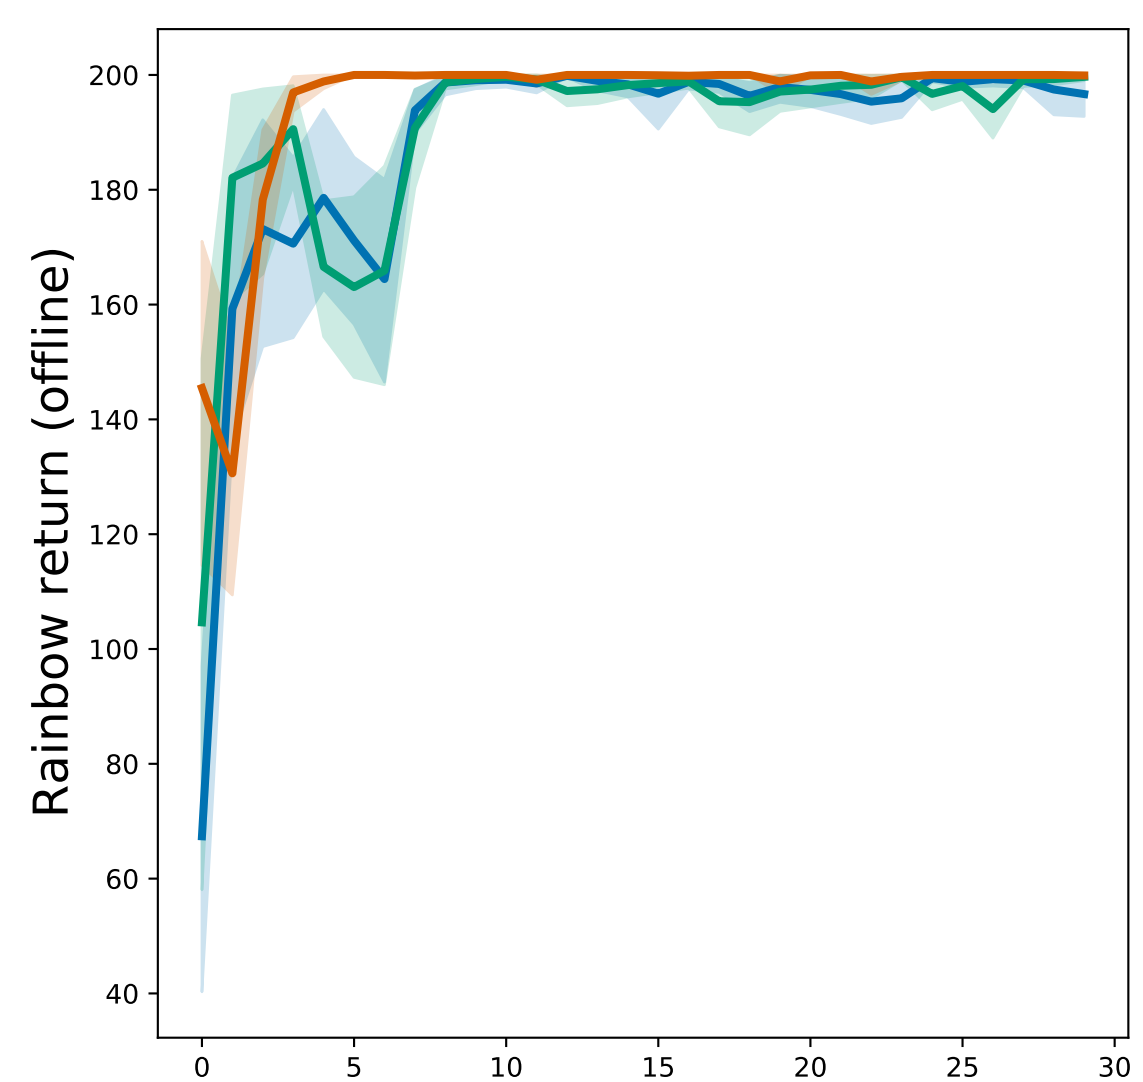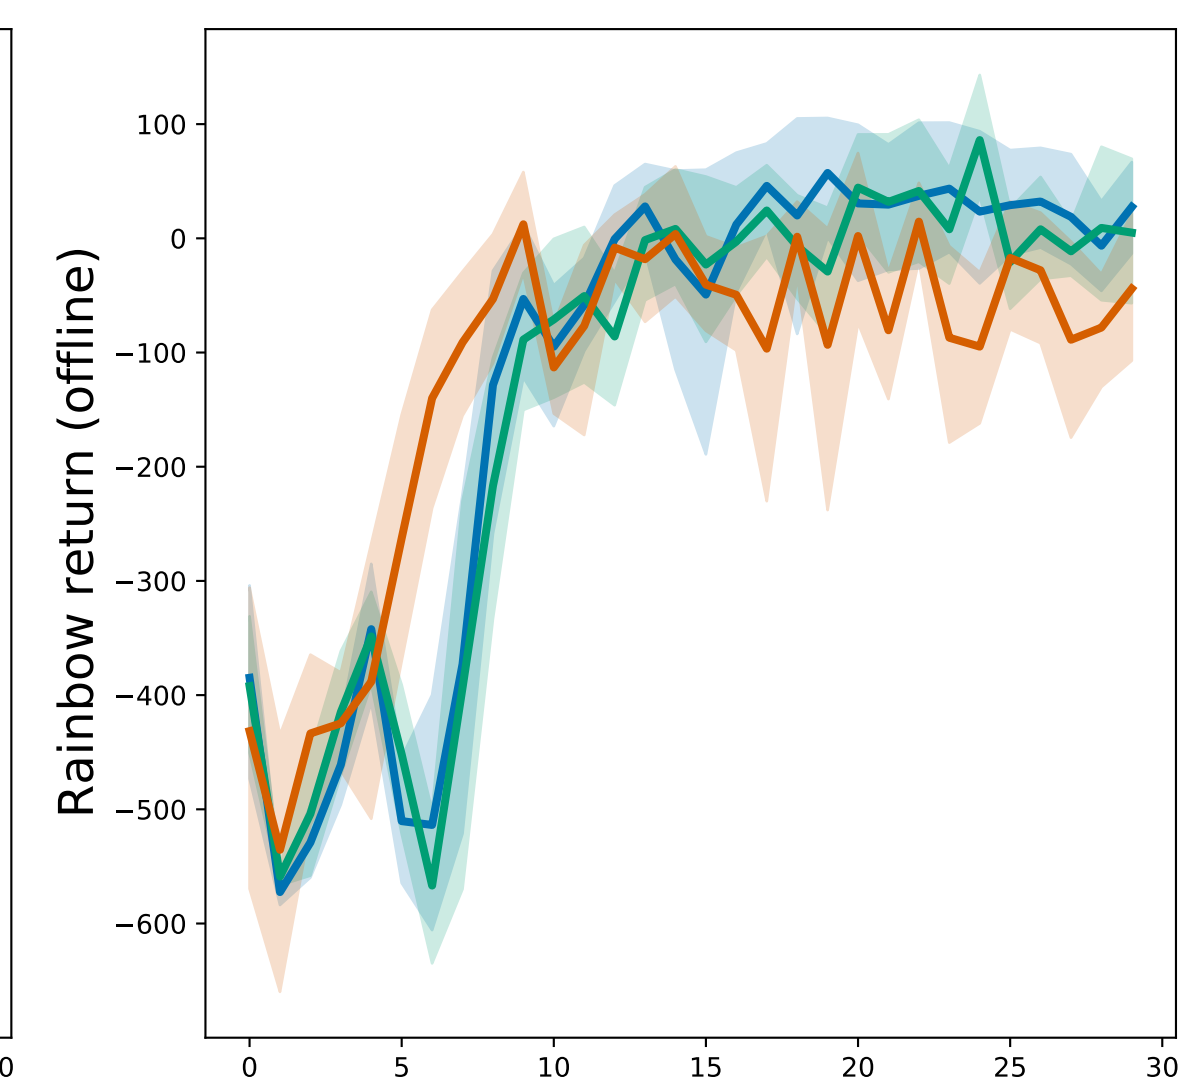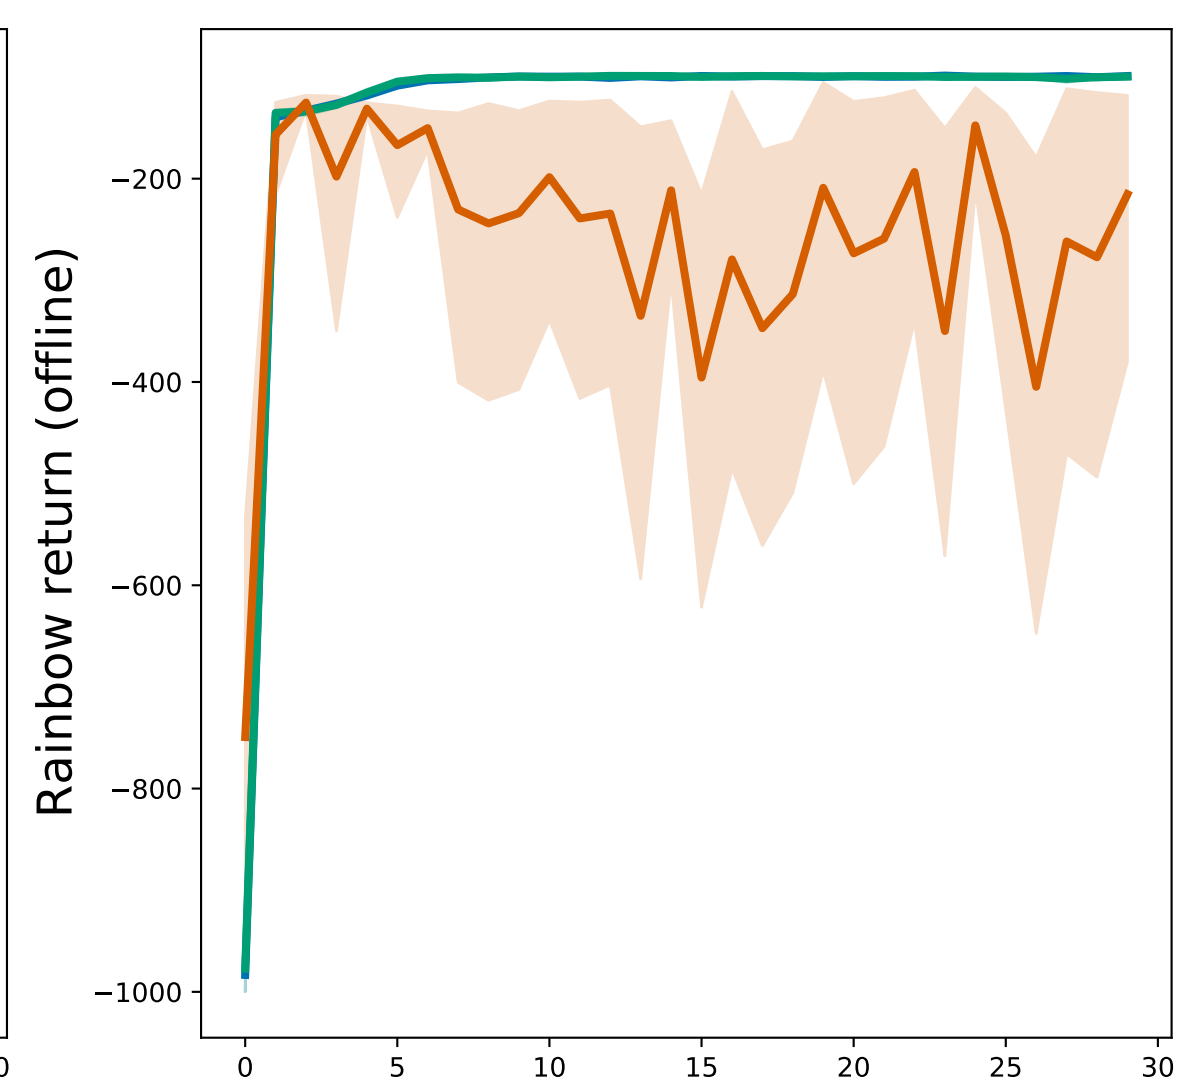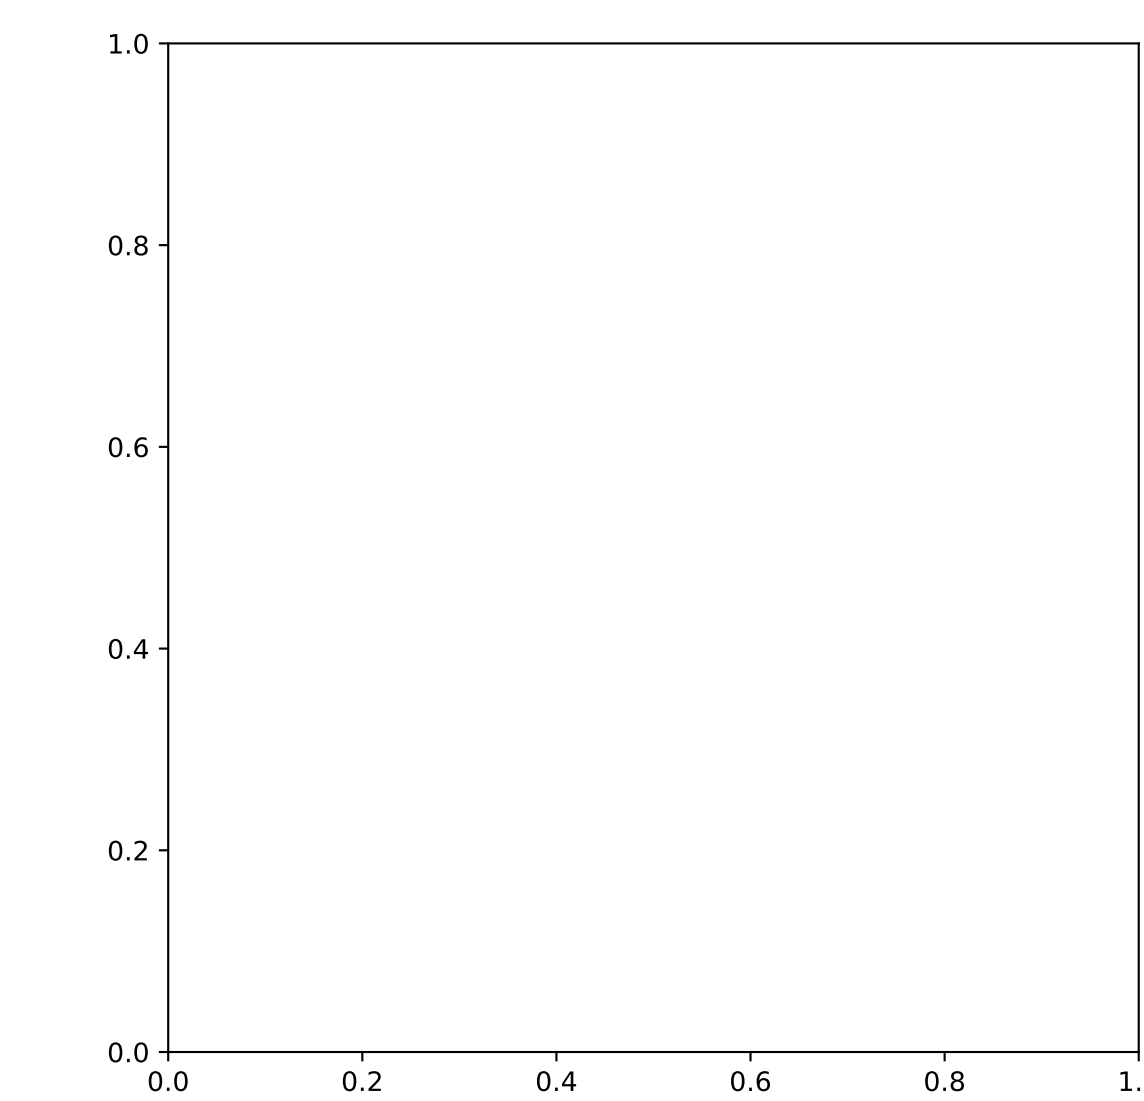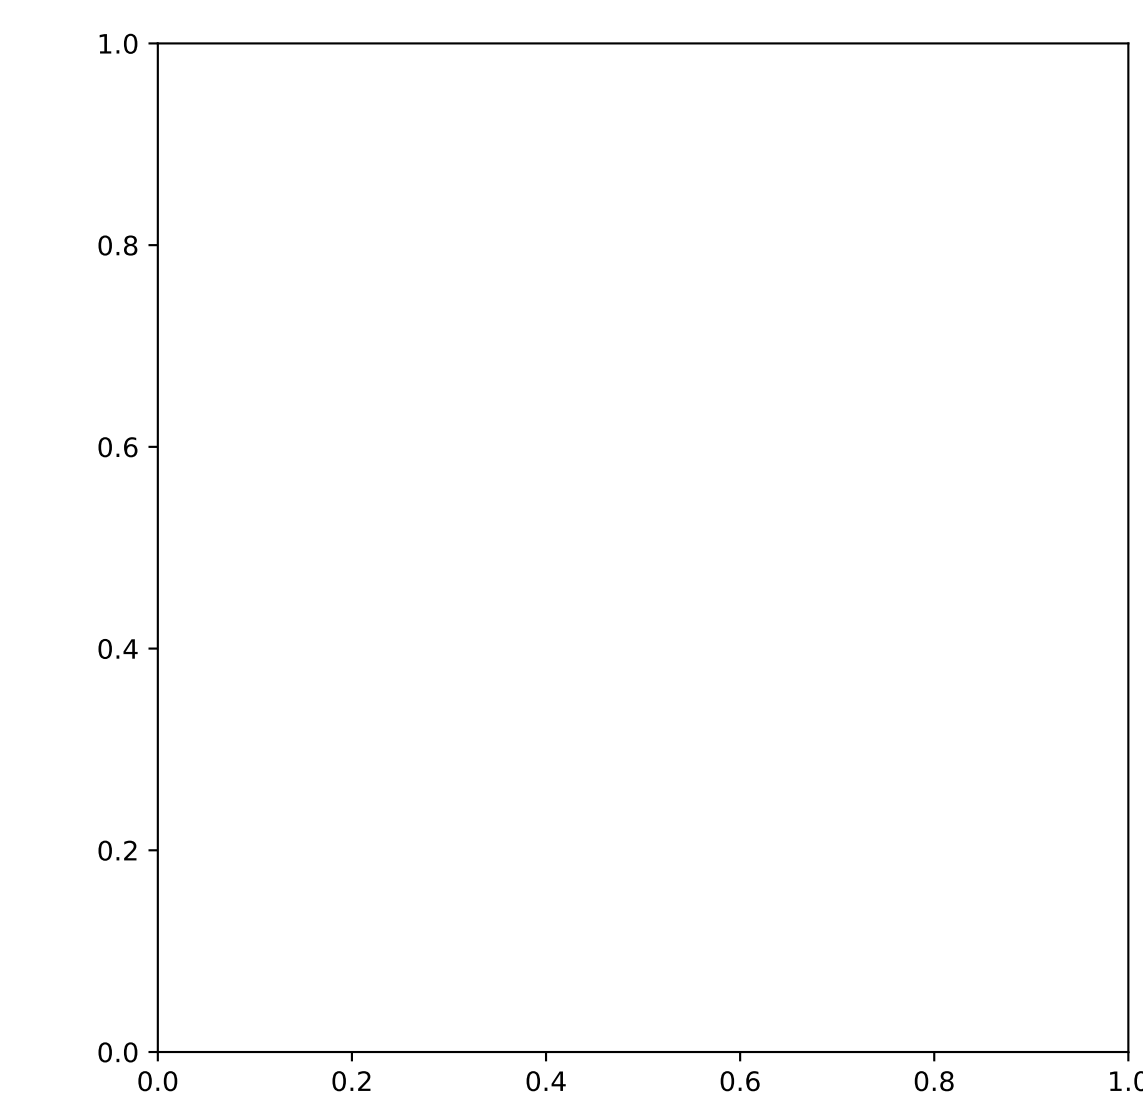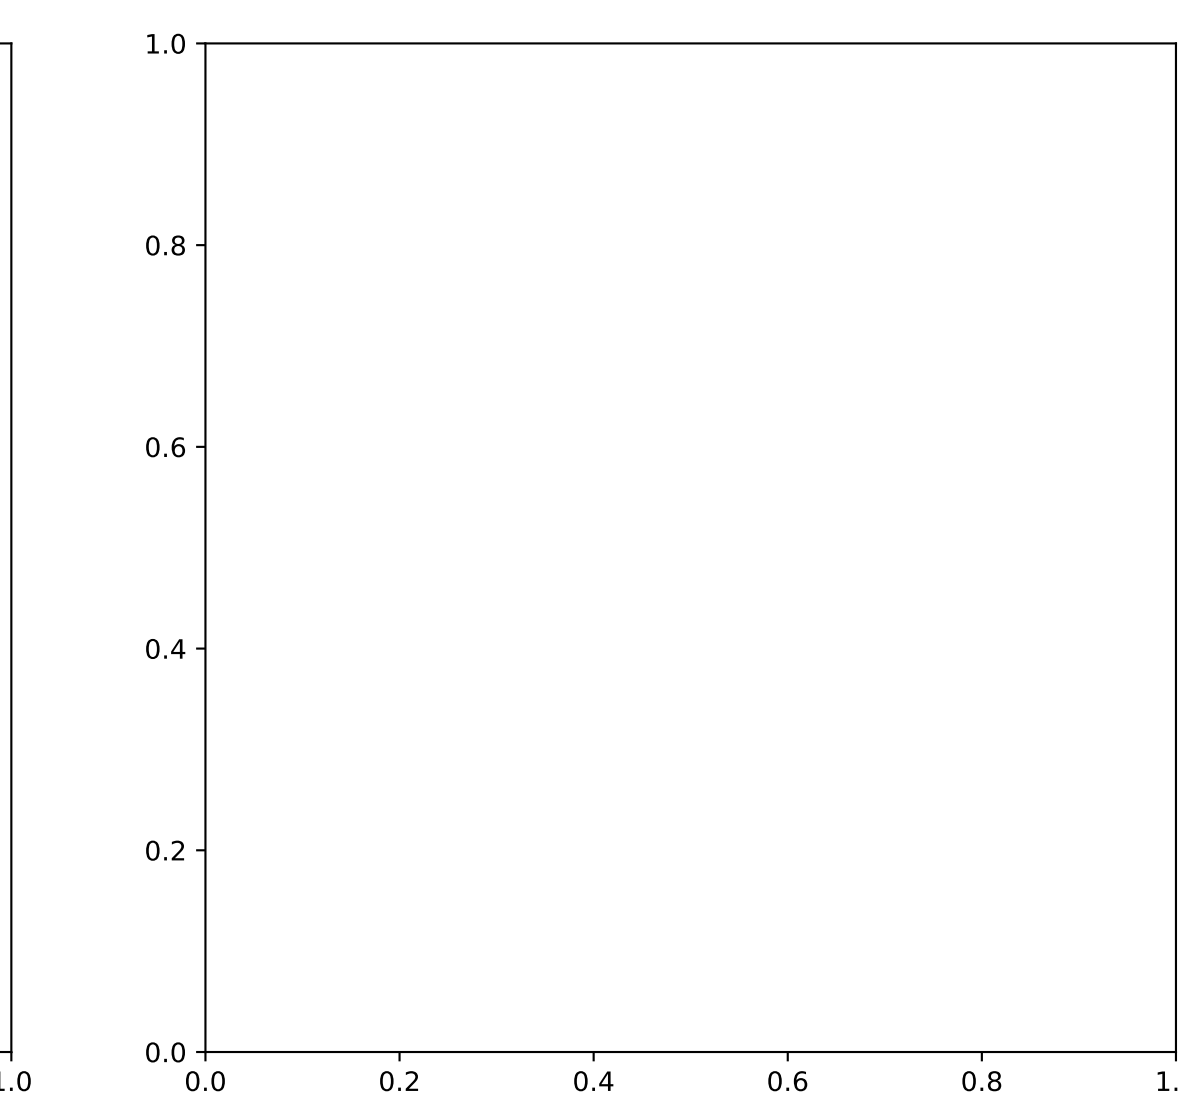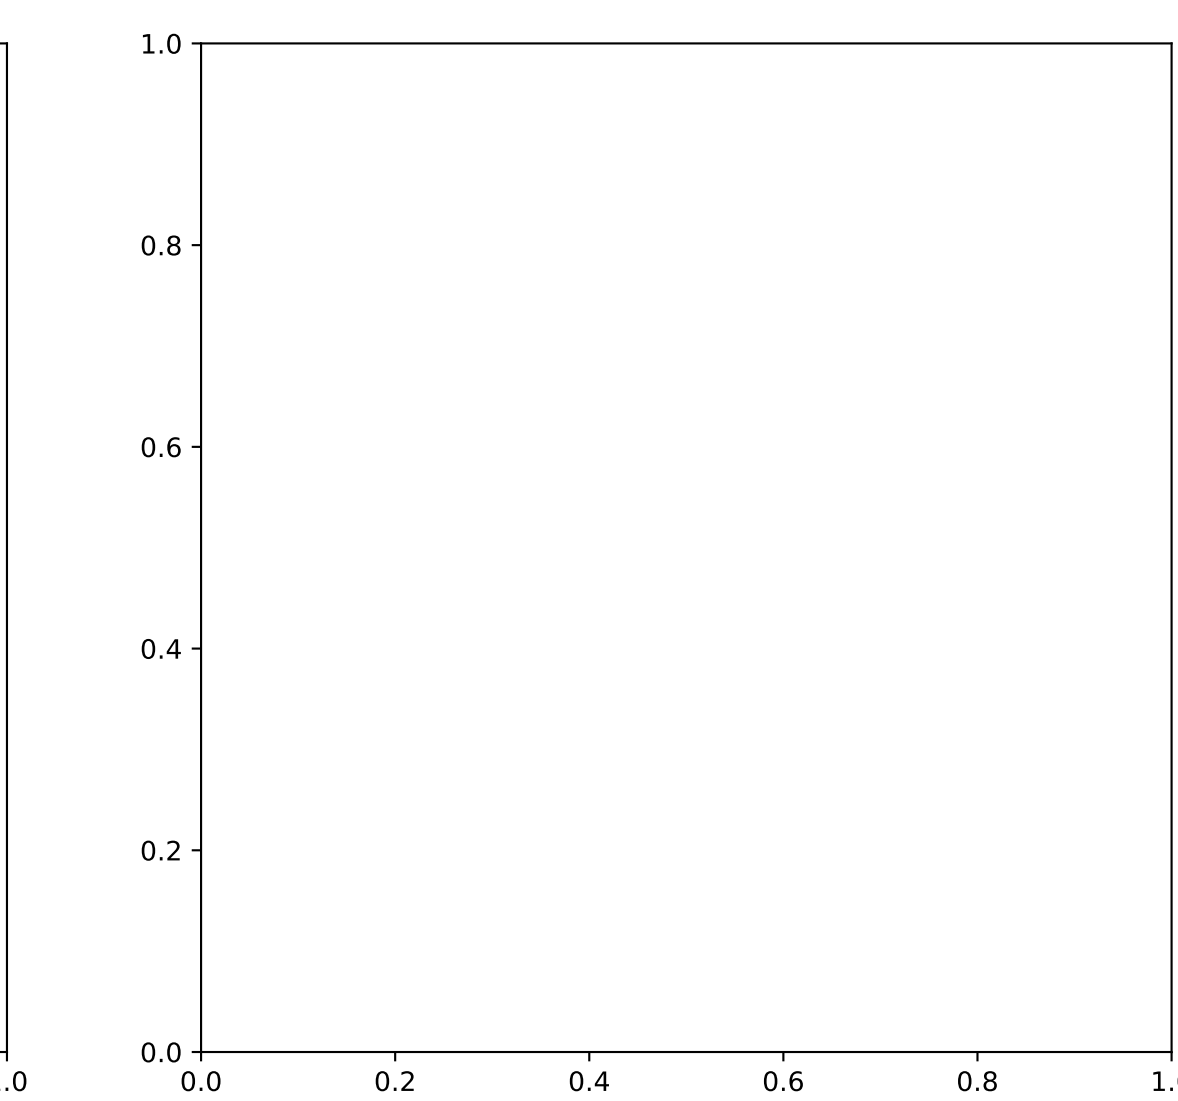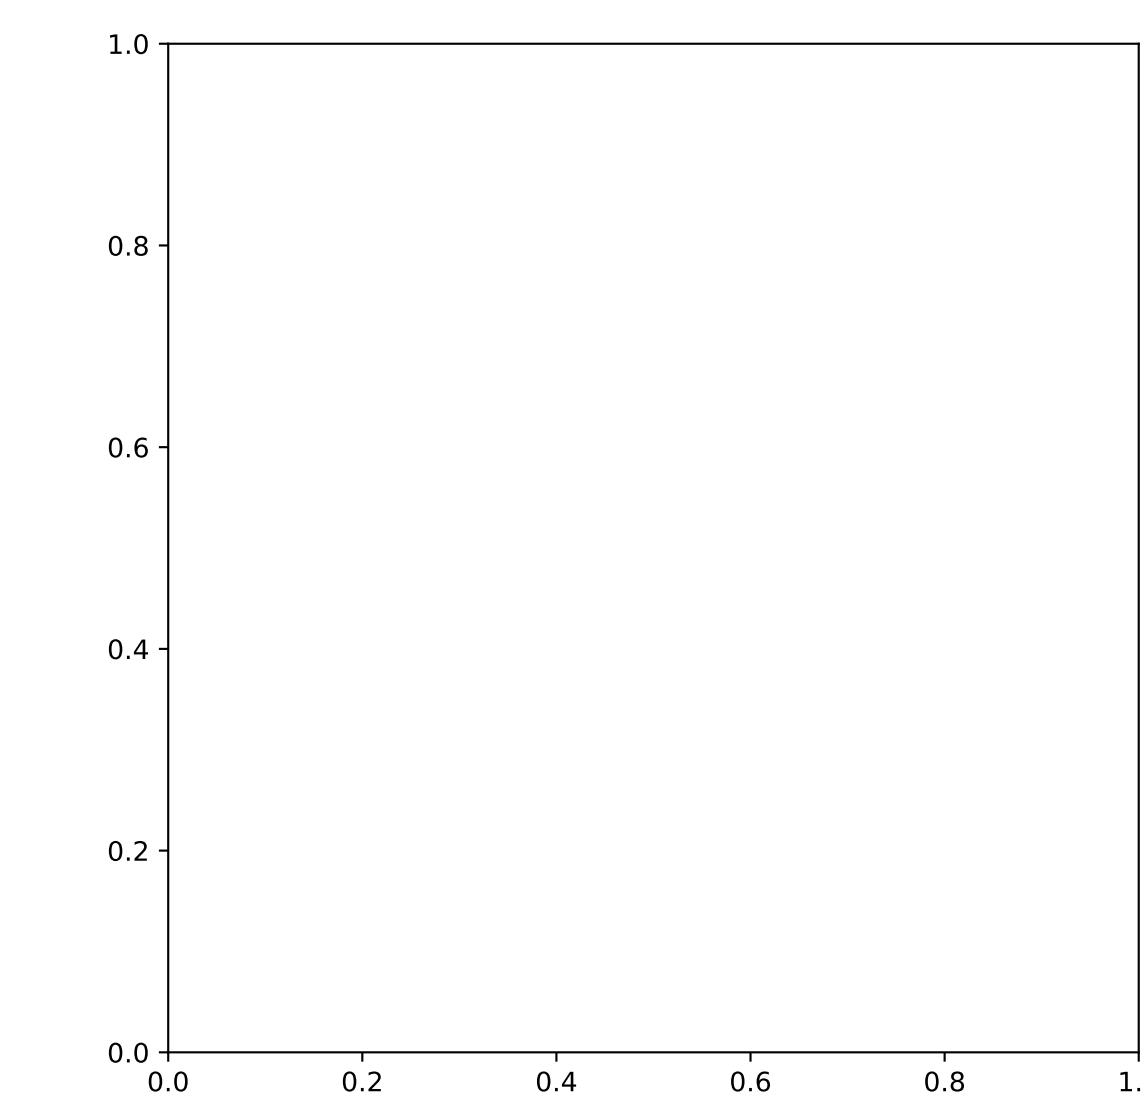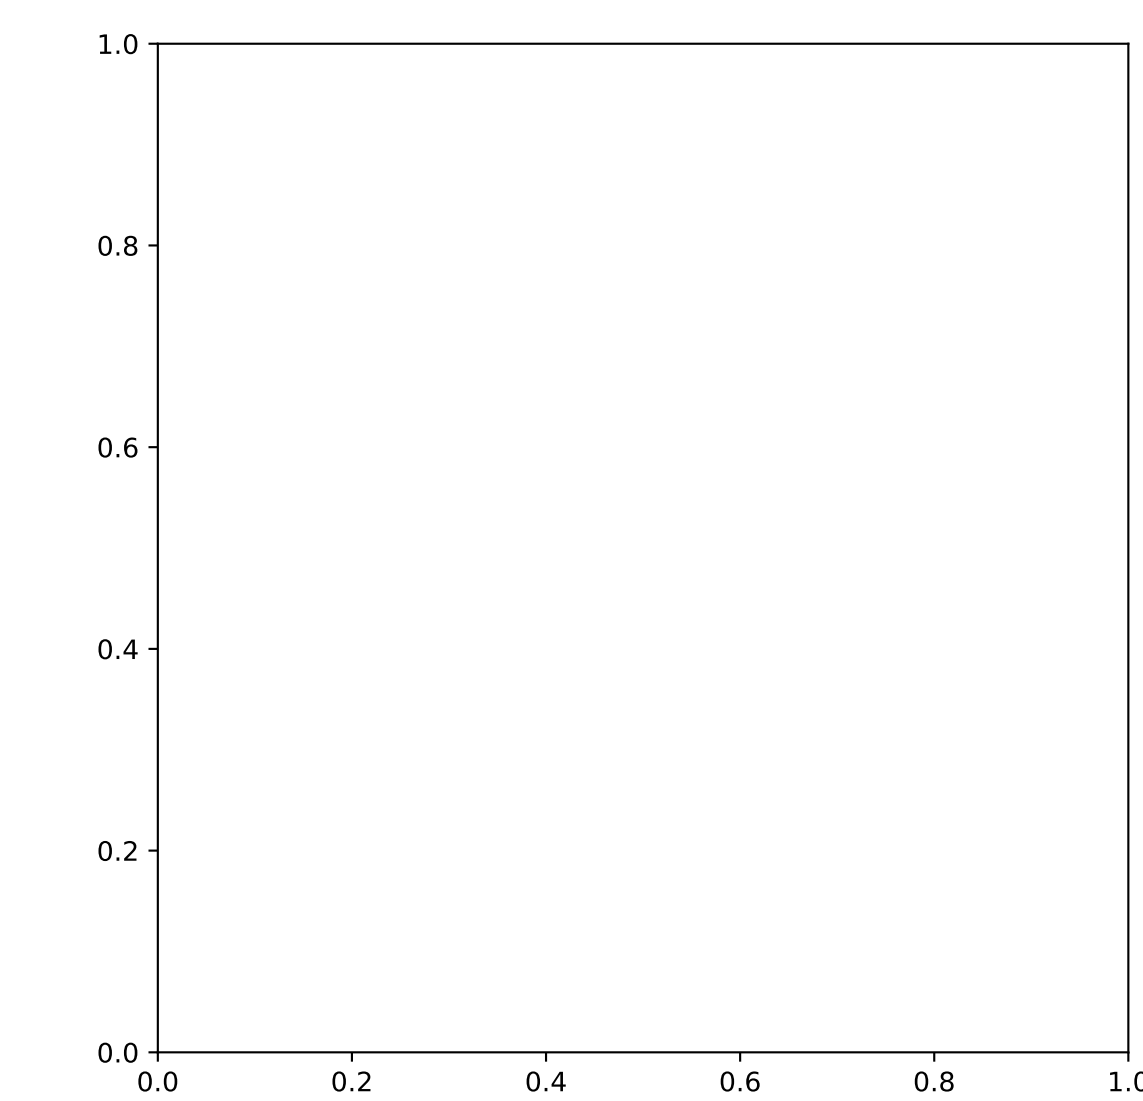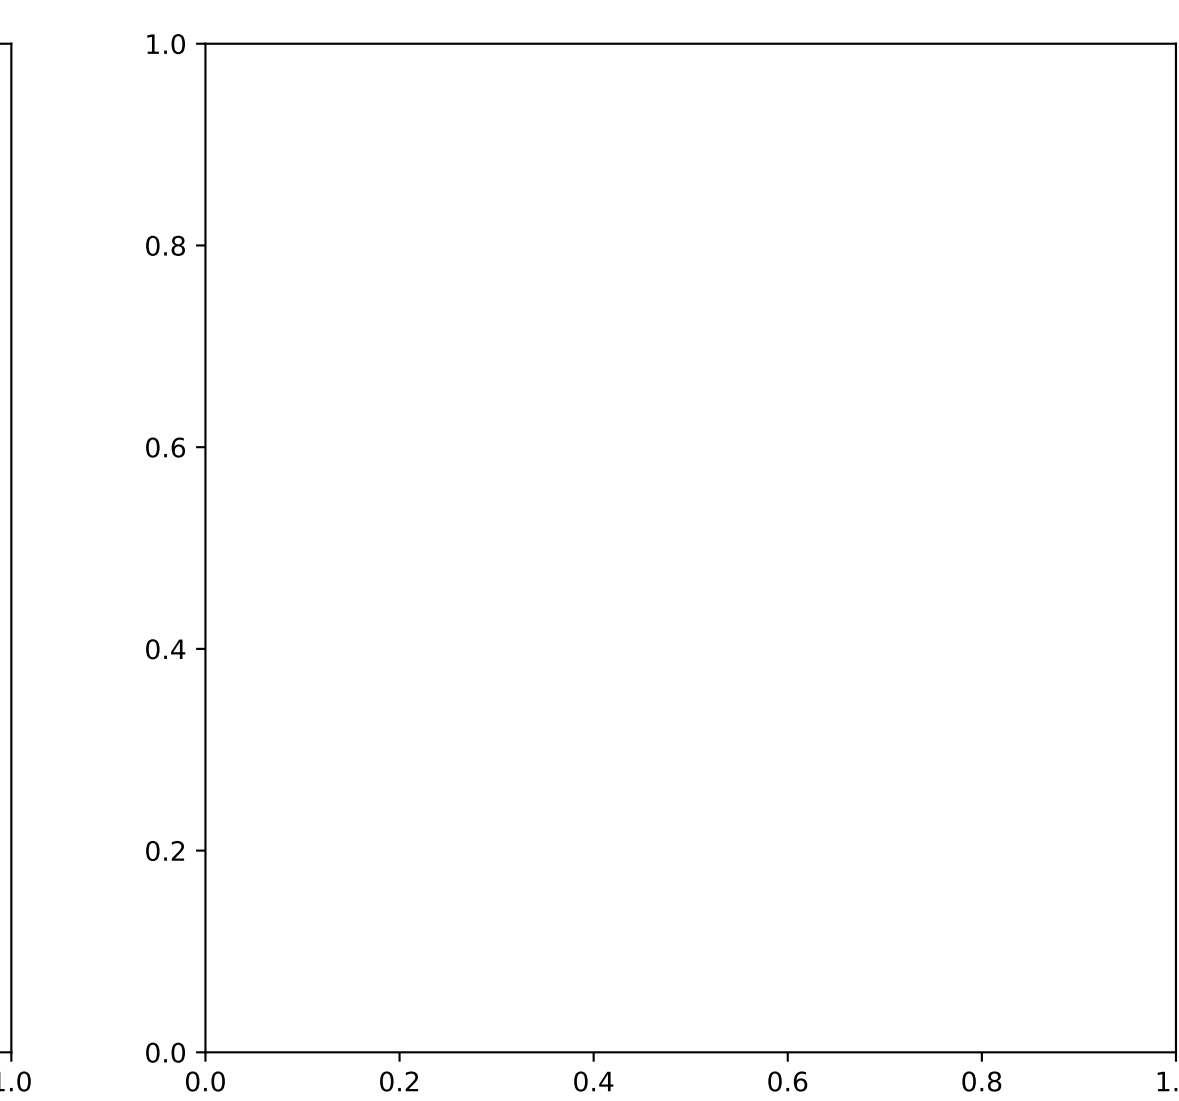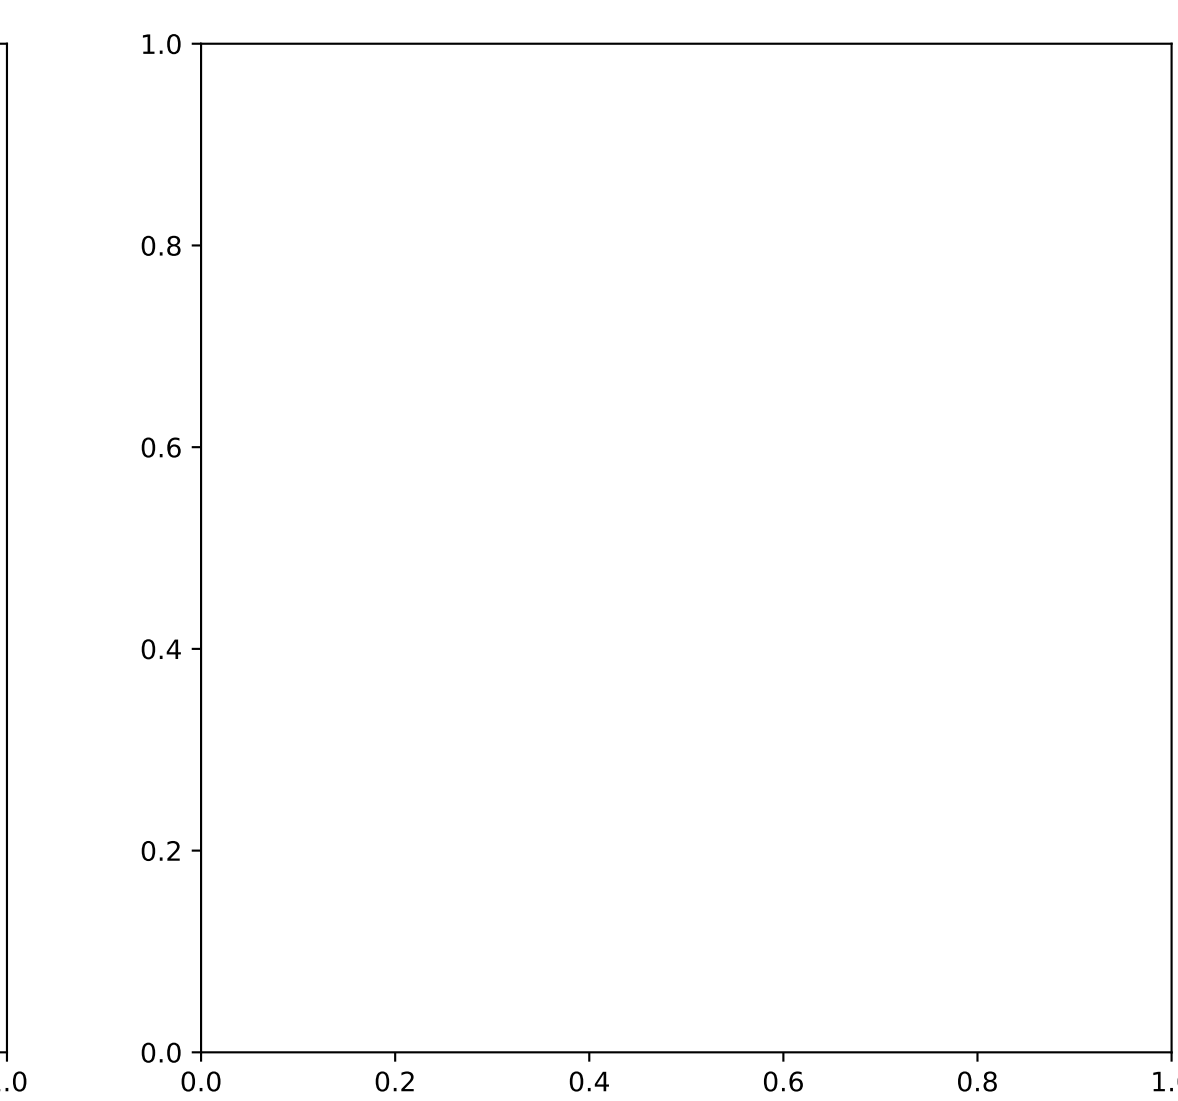

Supplement: supplementary_material [file attachment]

Acrobot

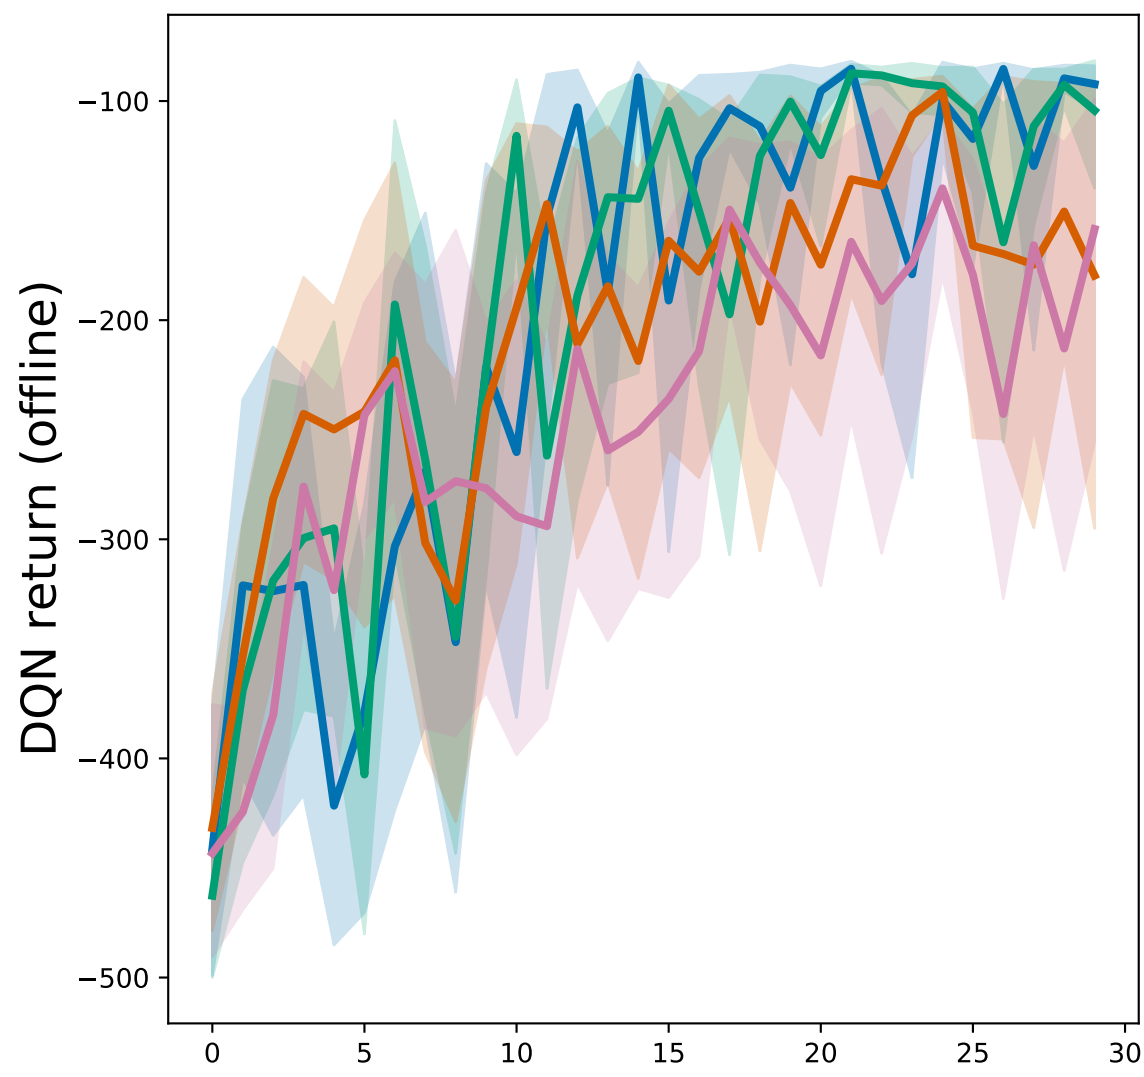

CartPole

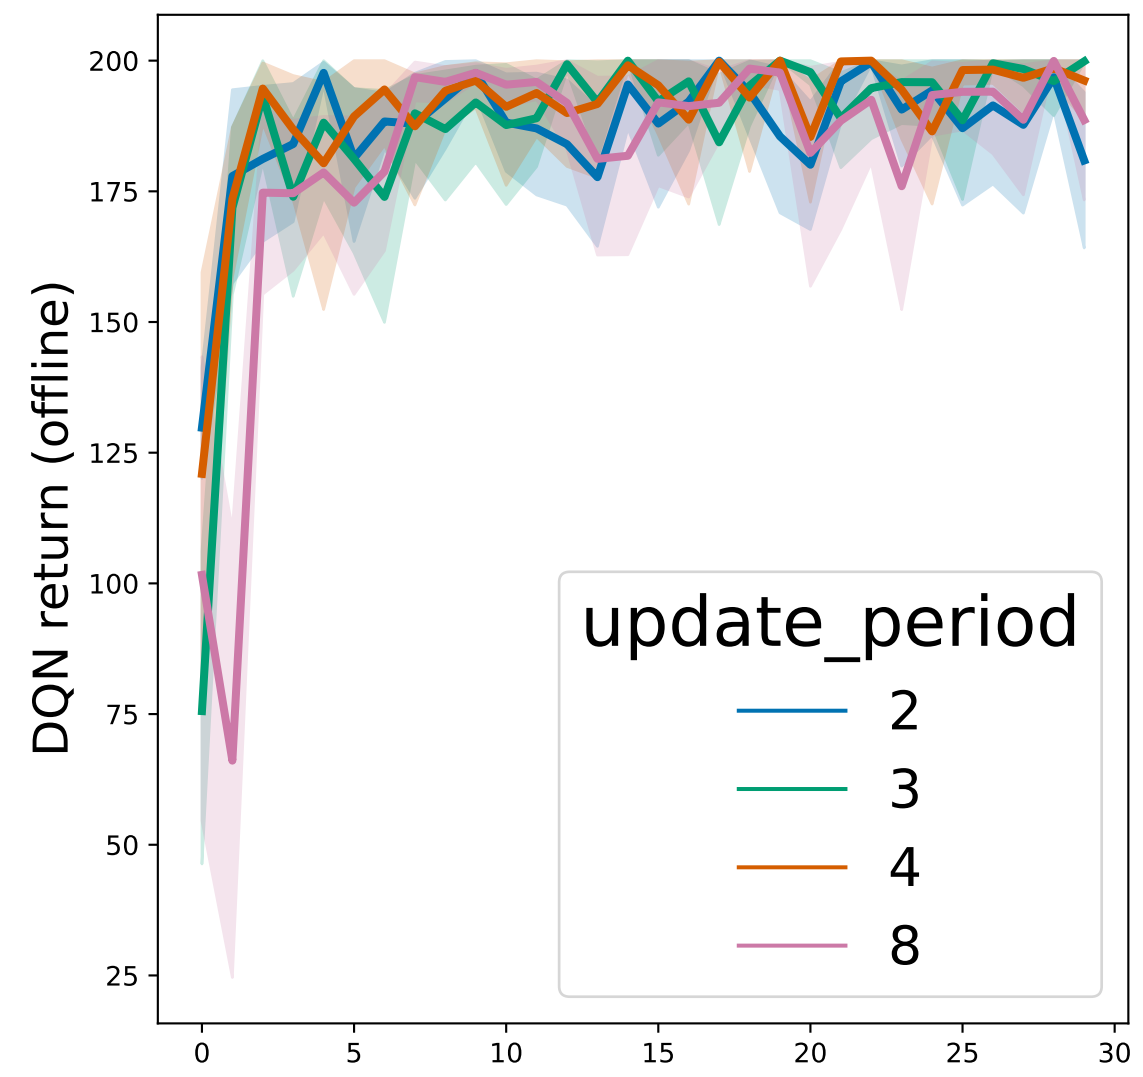

LunarLander

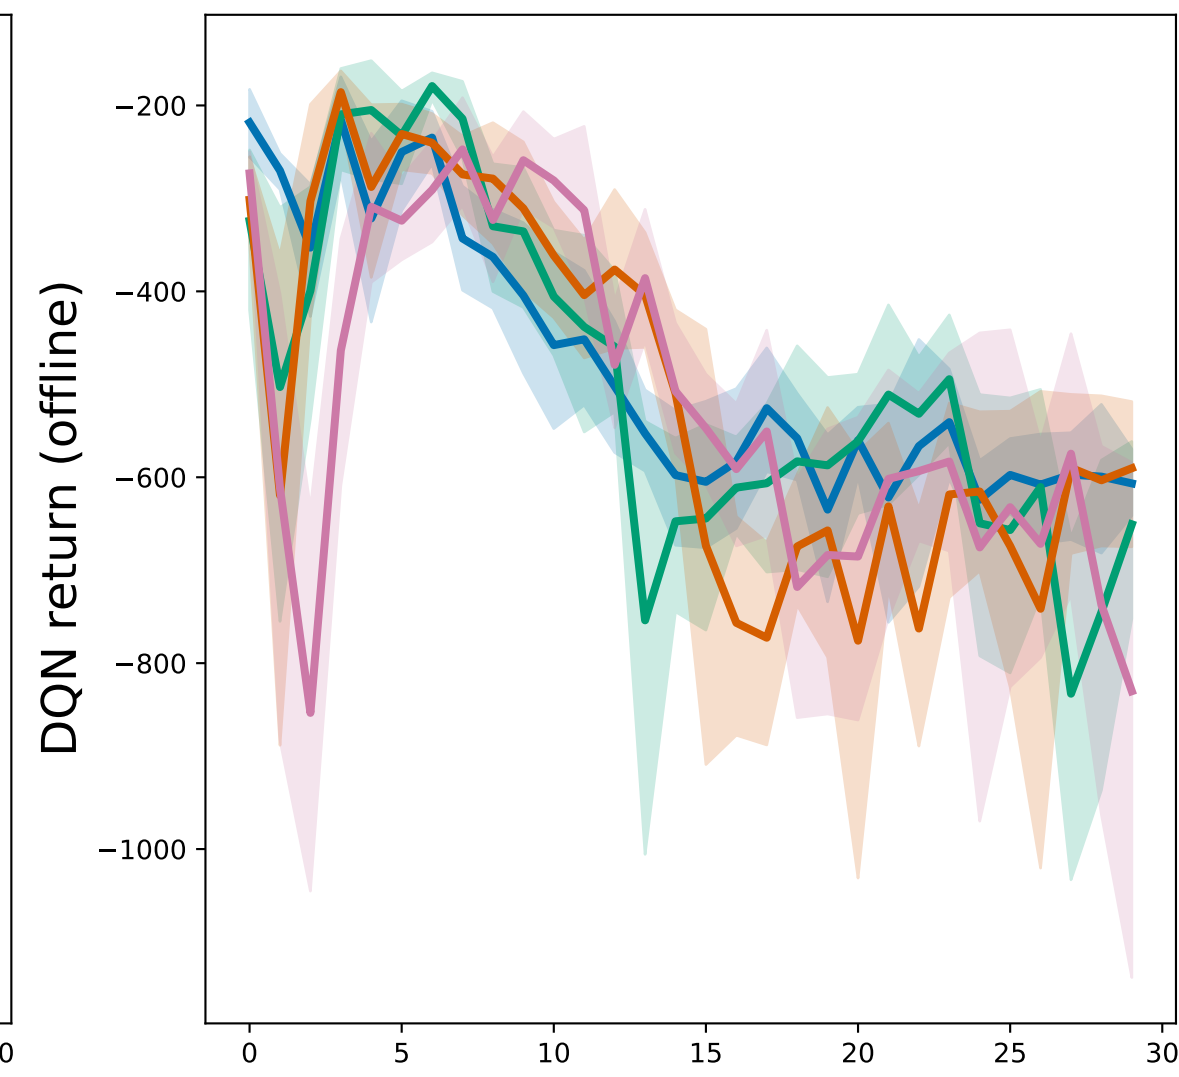

MountainCar

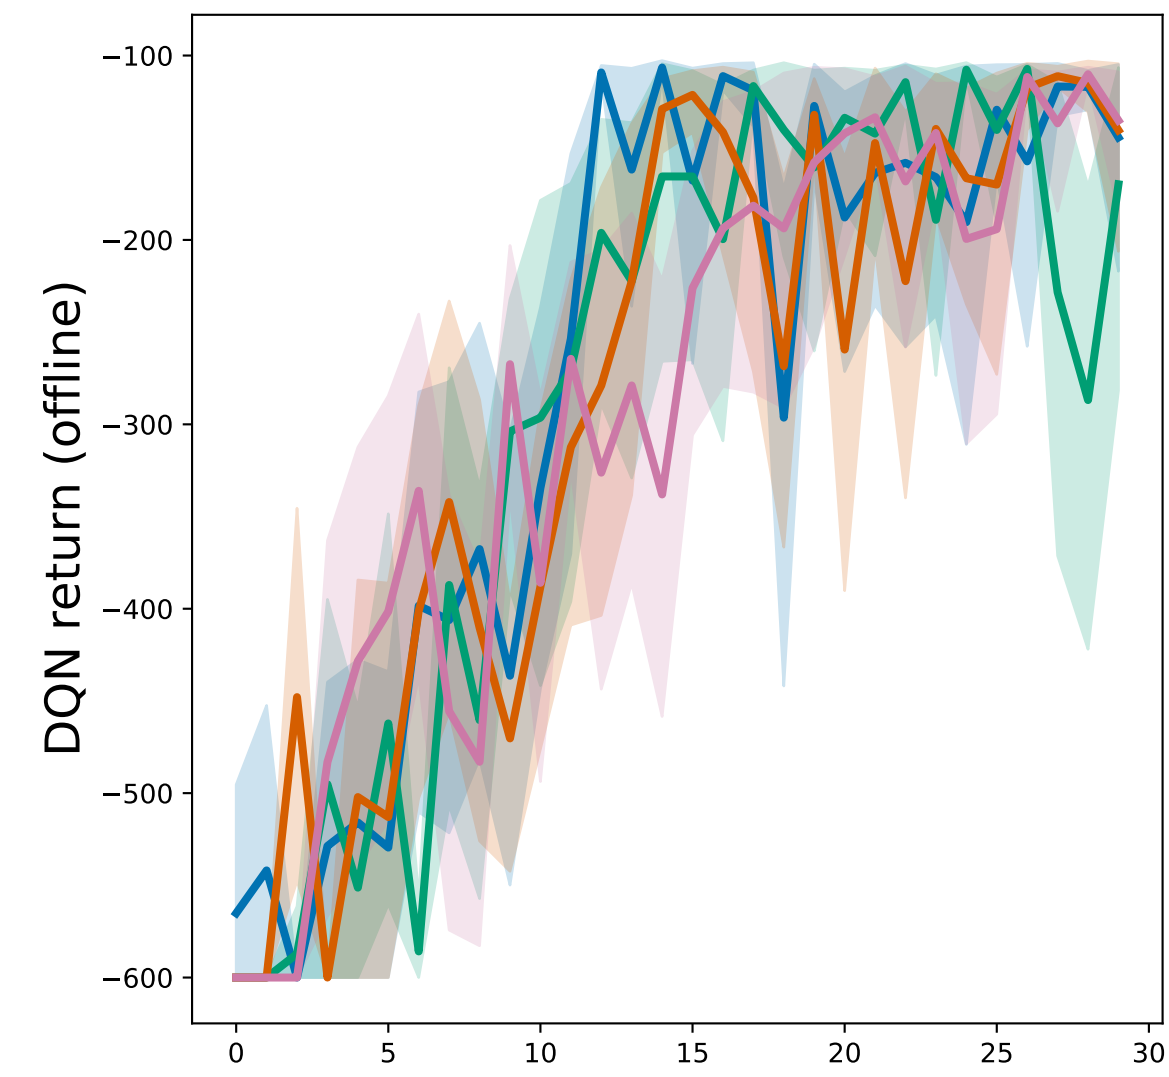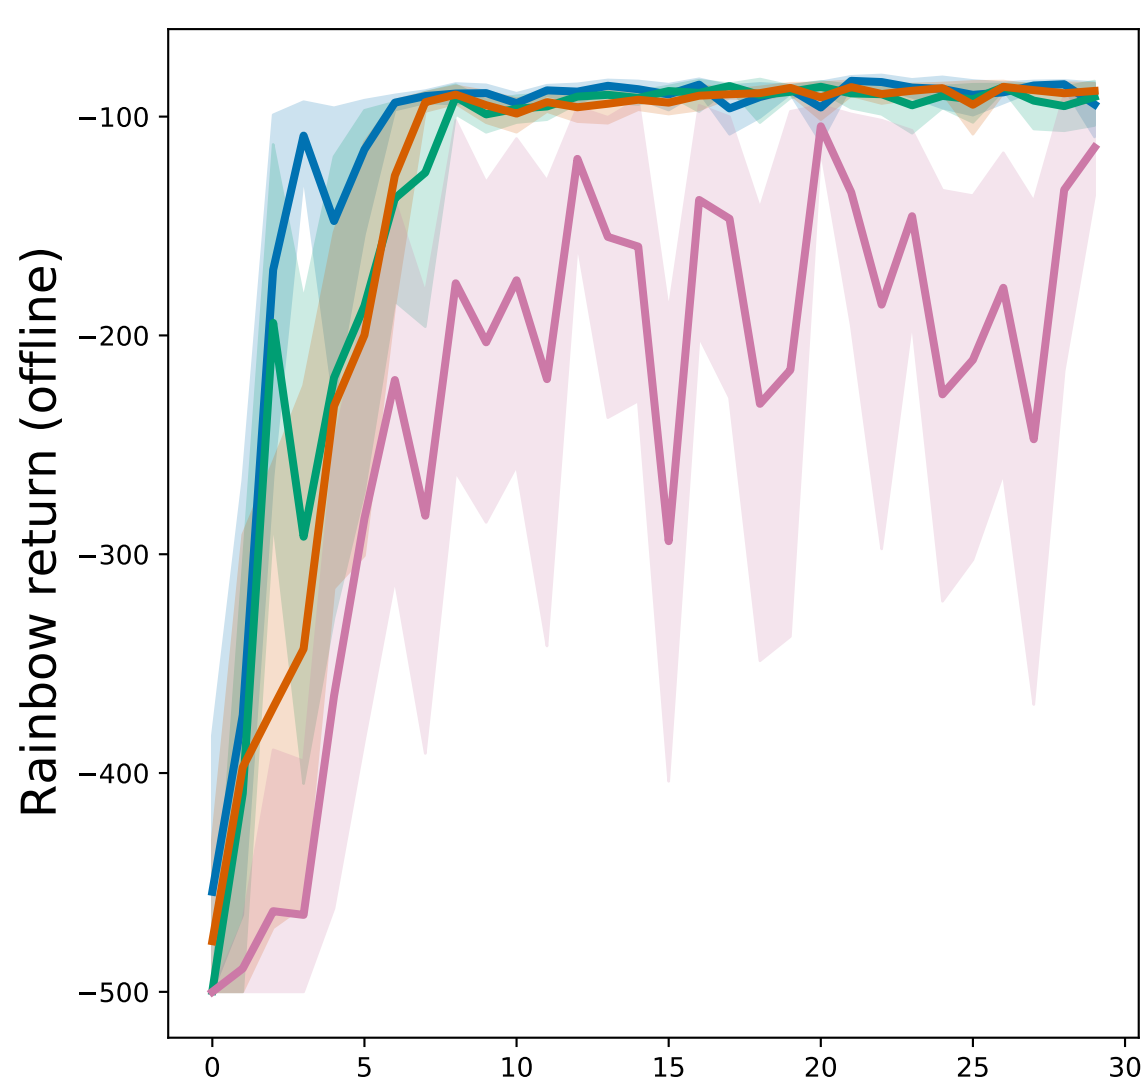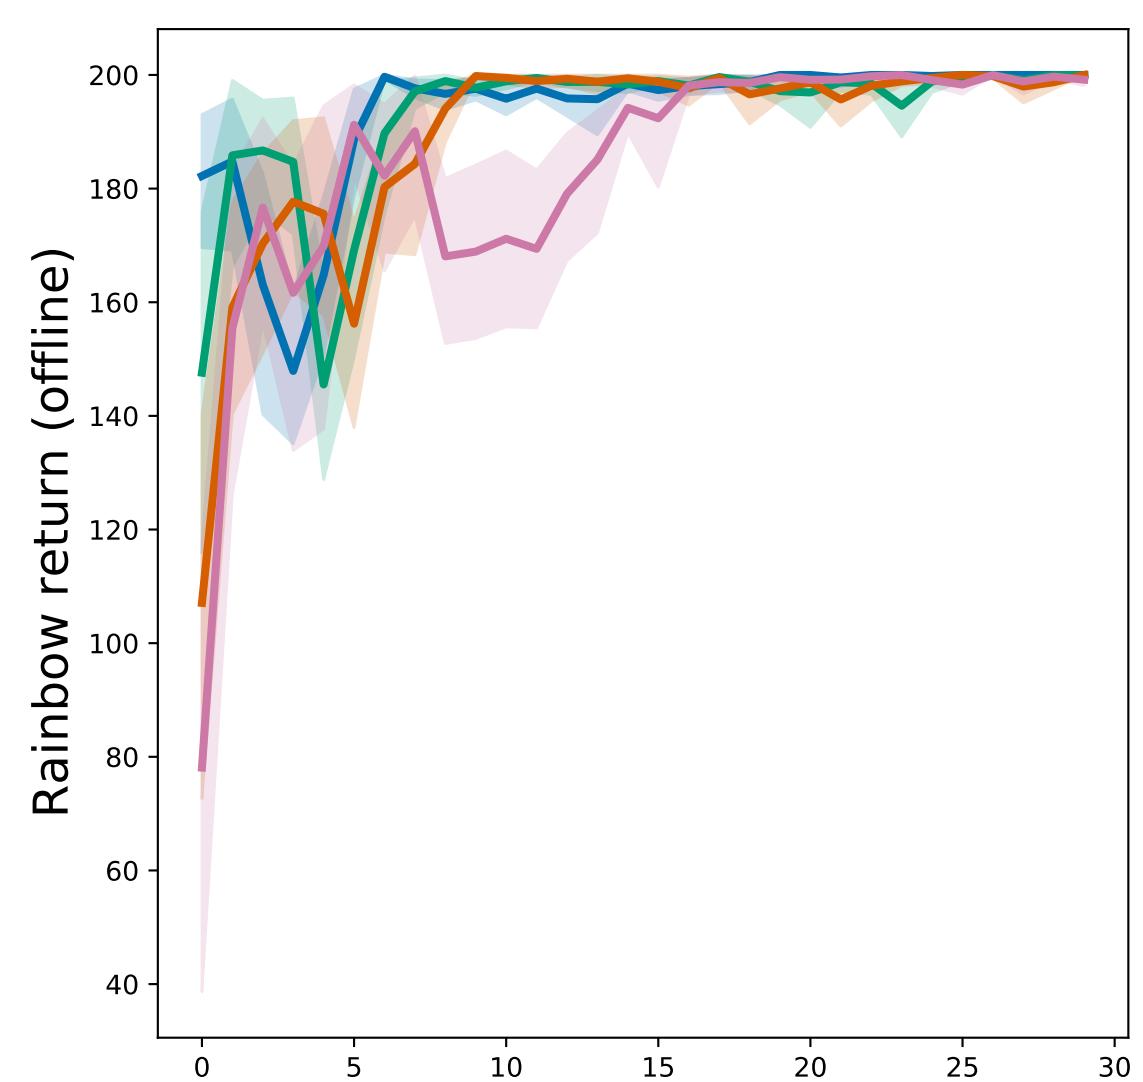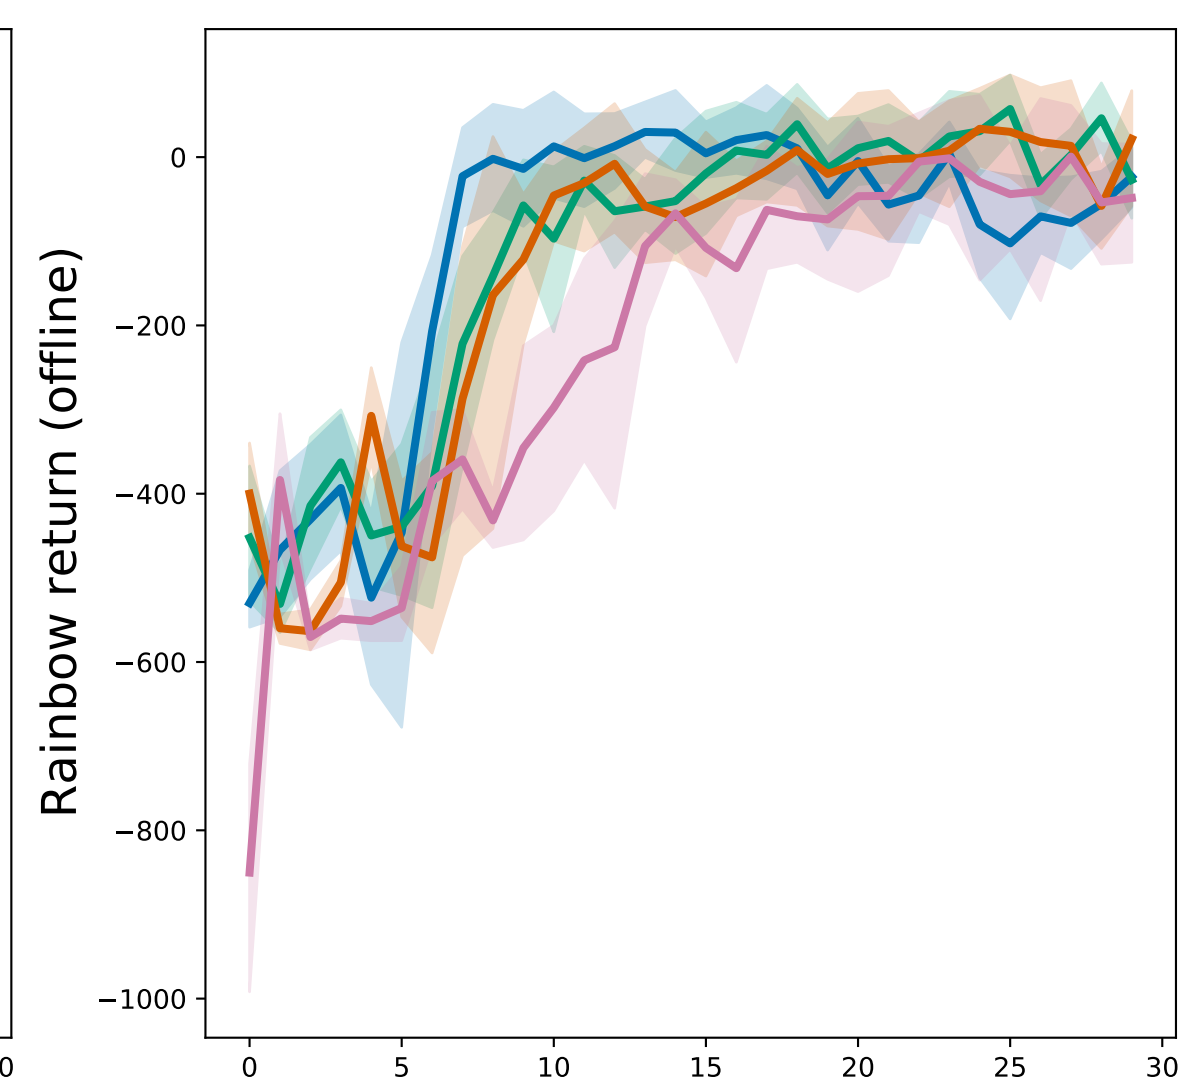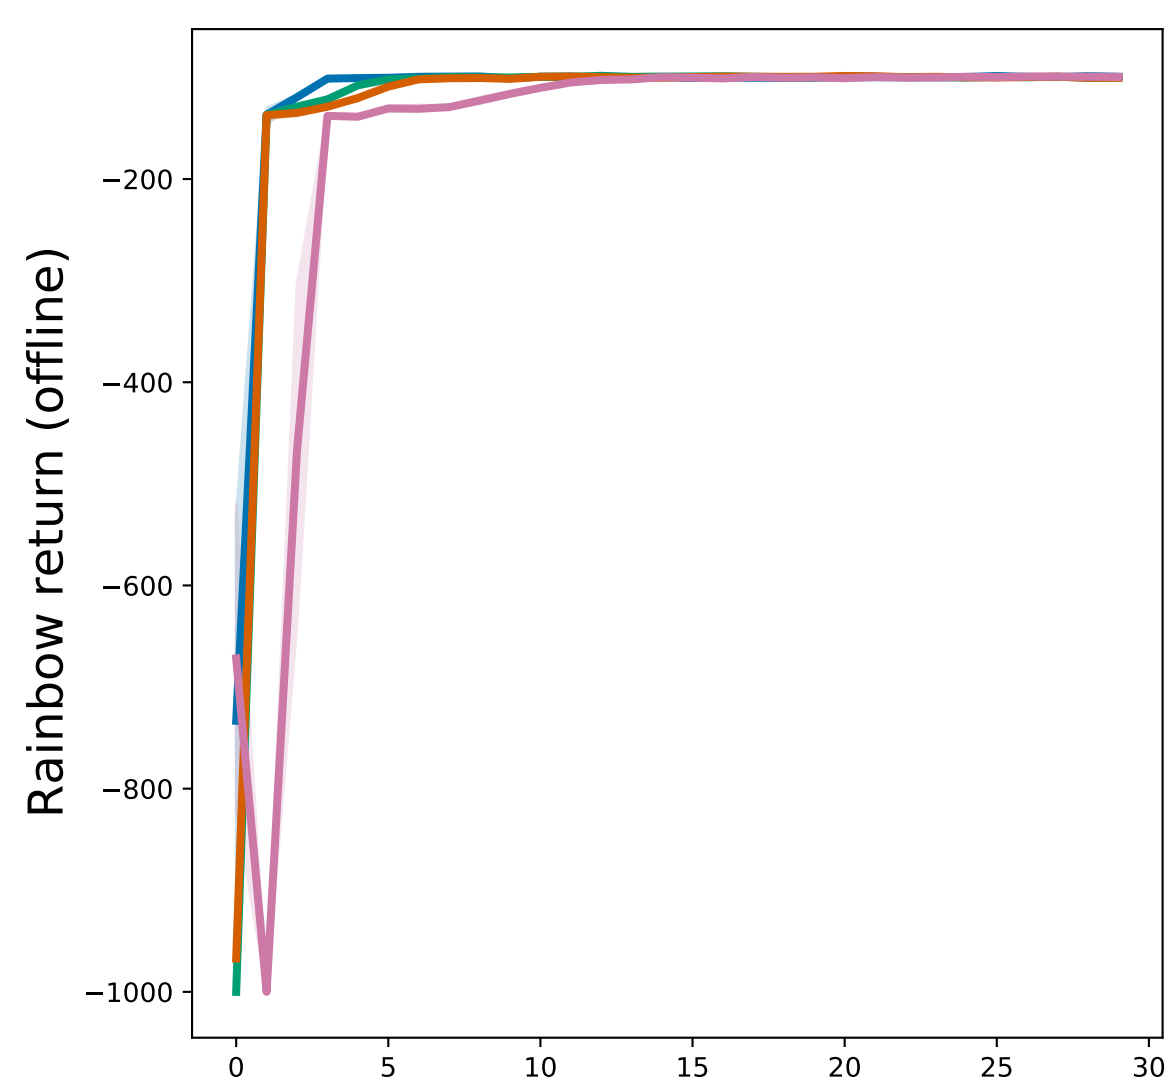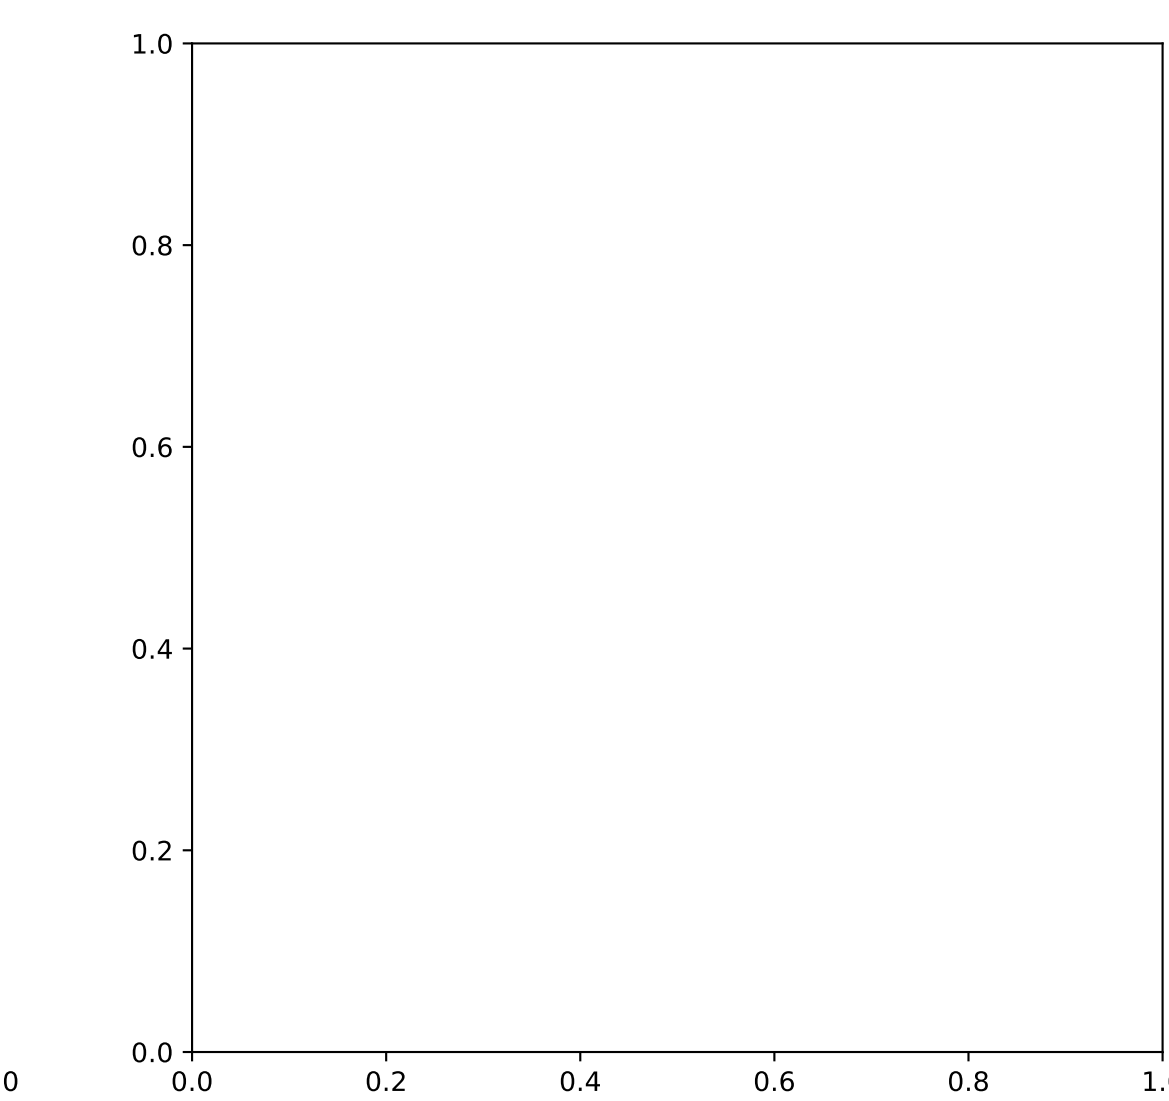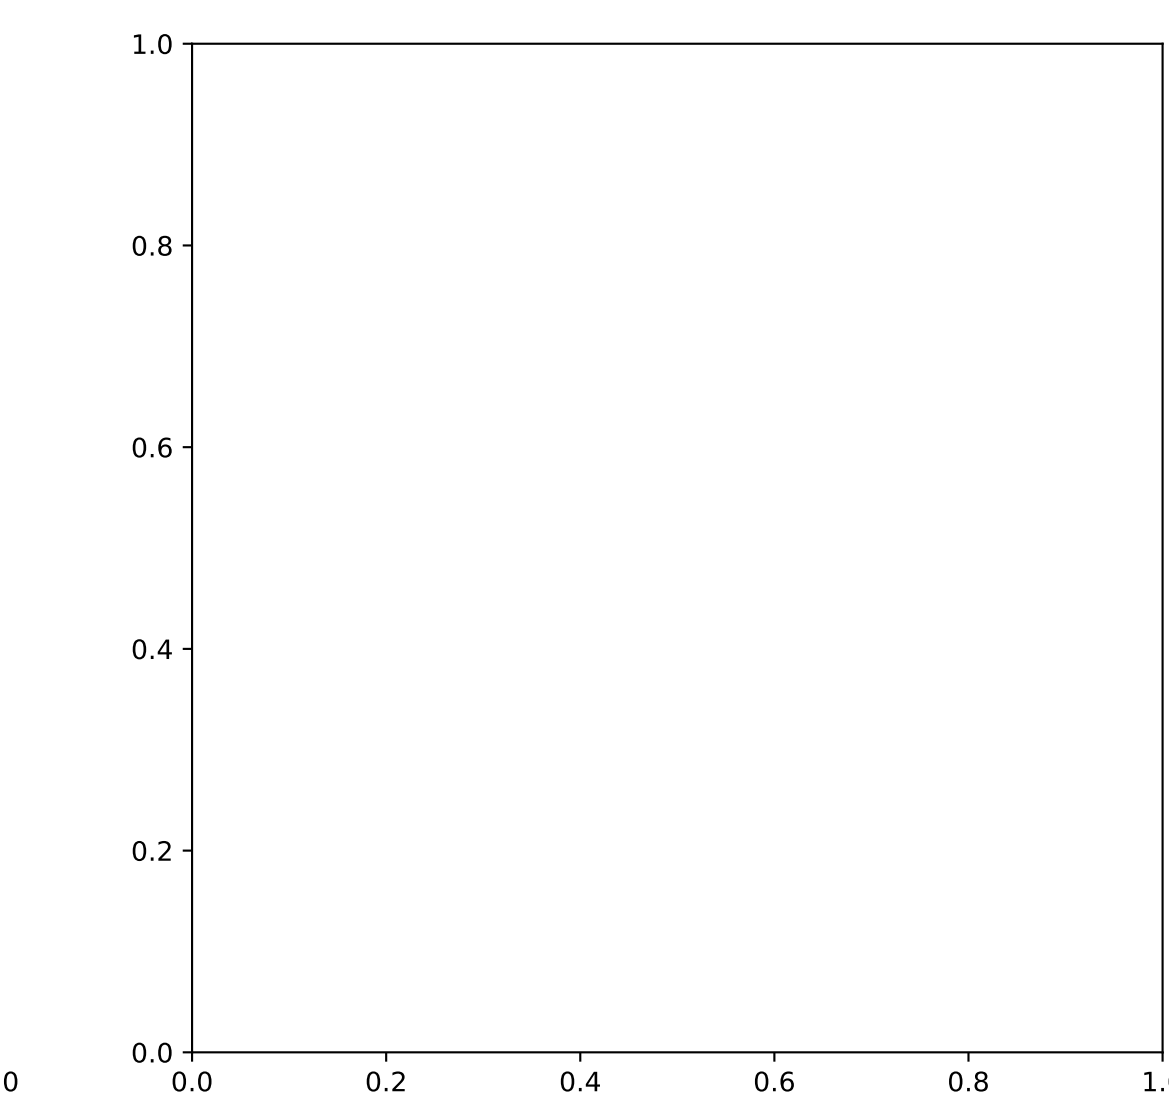

Supplement: supplementary_material [file attachment]

Acrobot

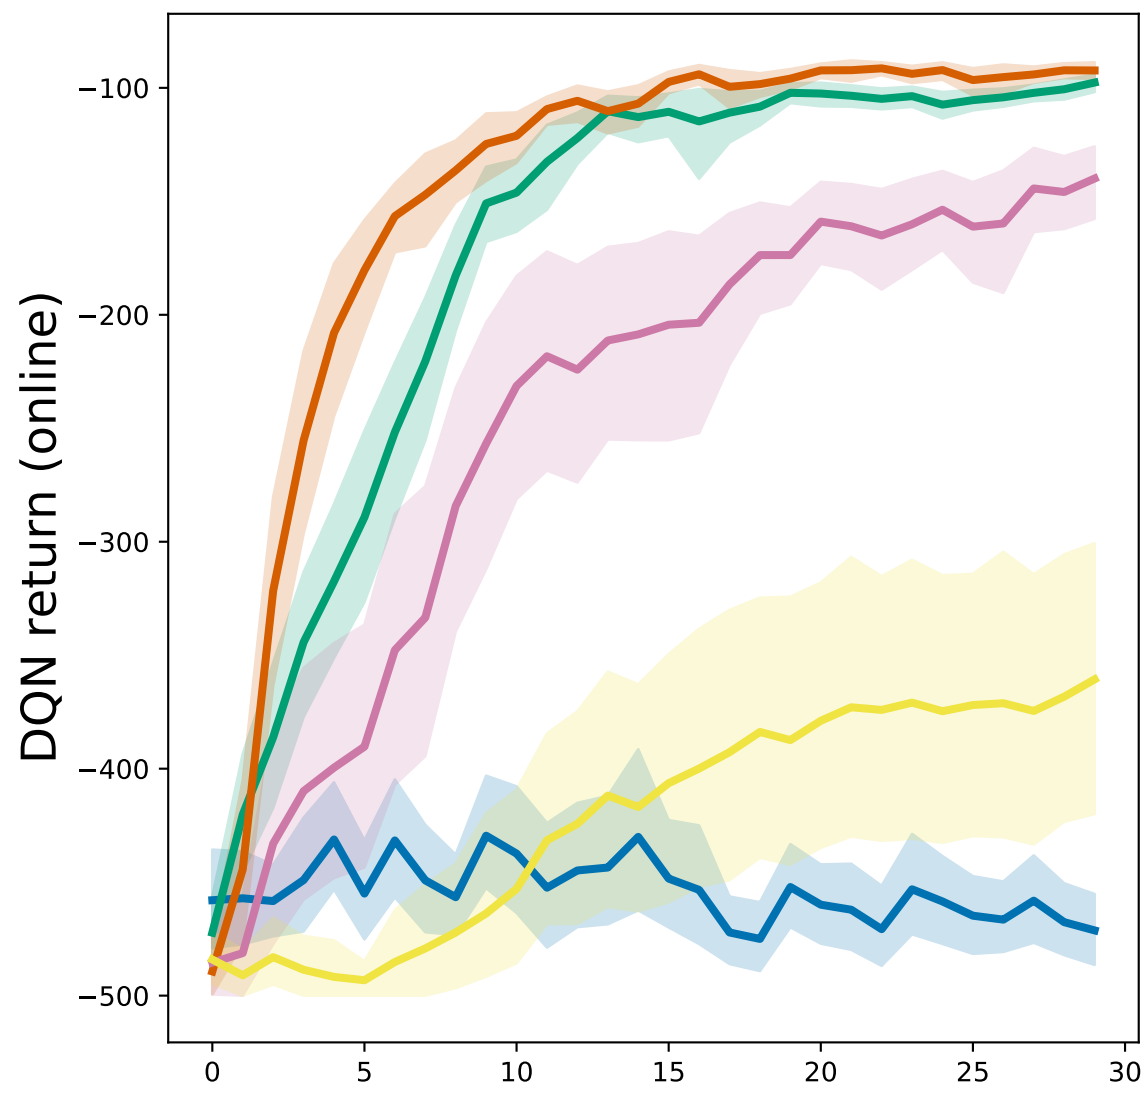

CartPole

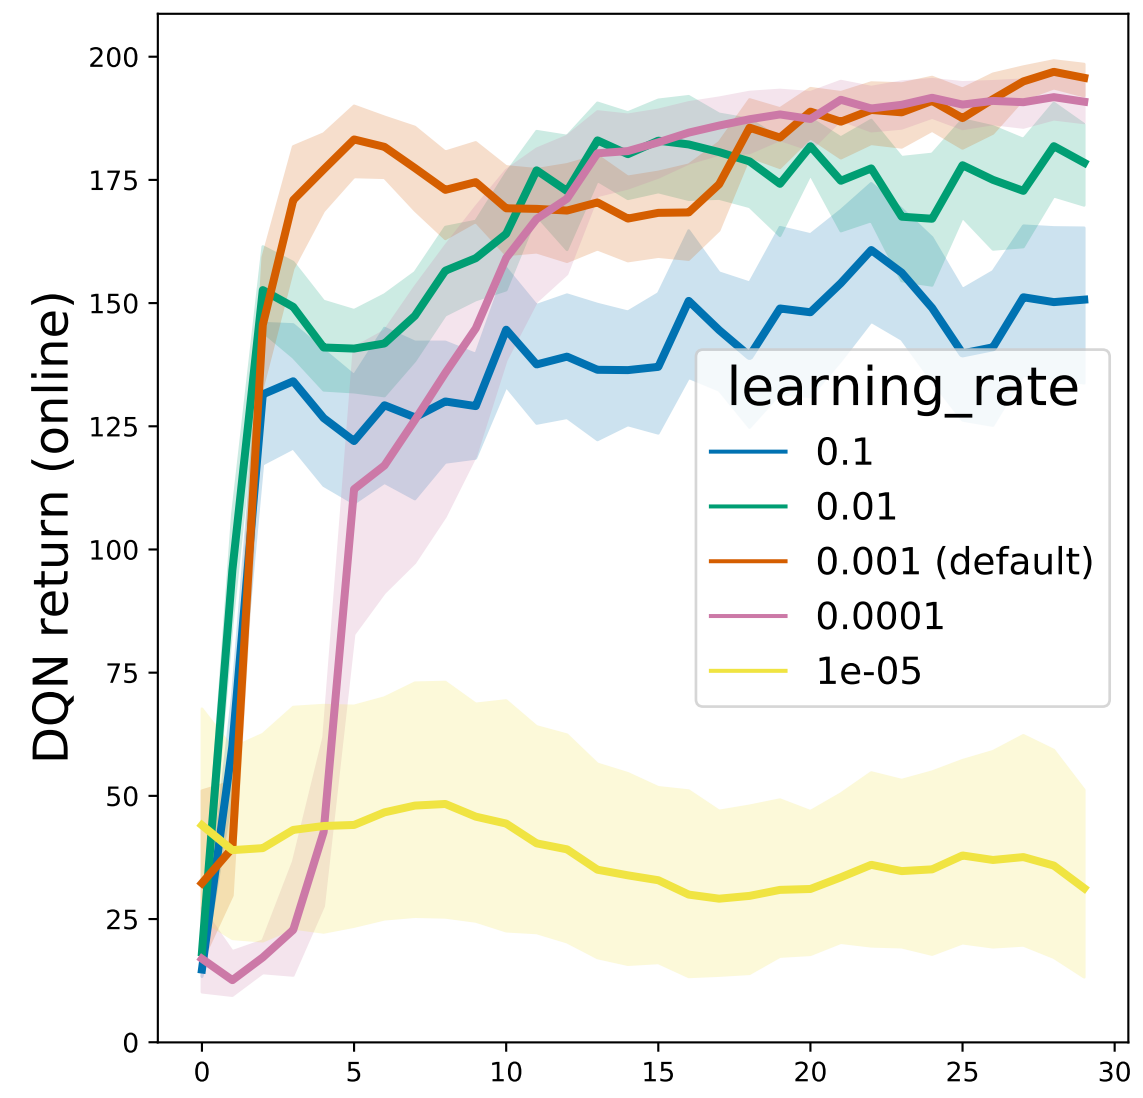

LunarLander

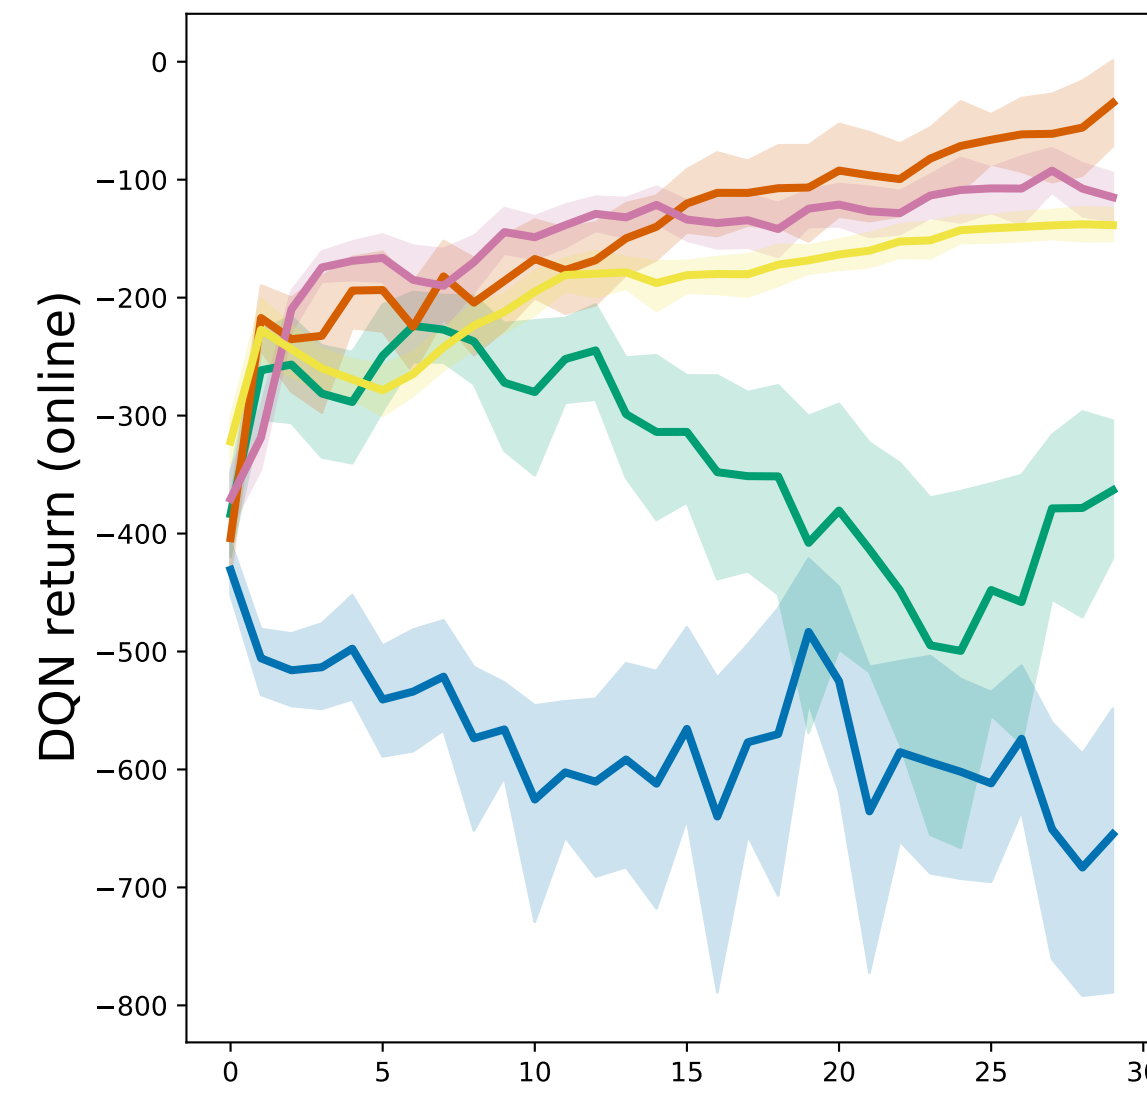

MountainCar

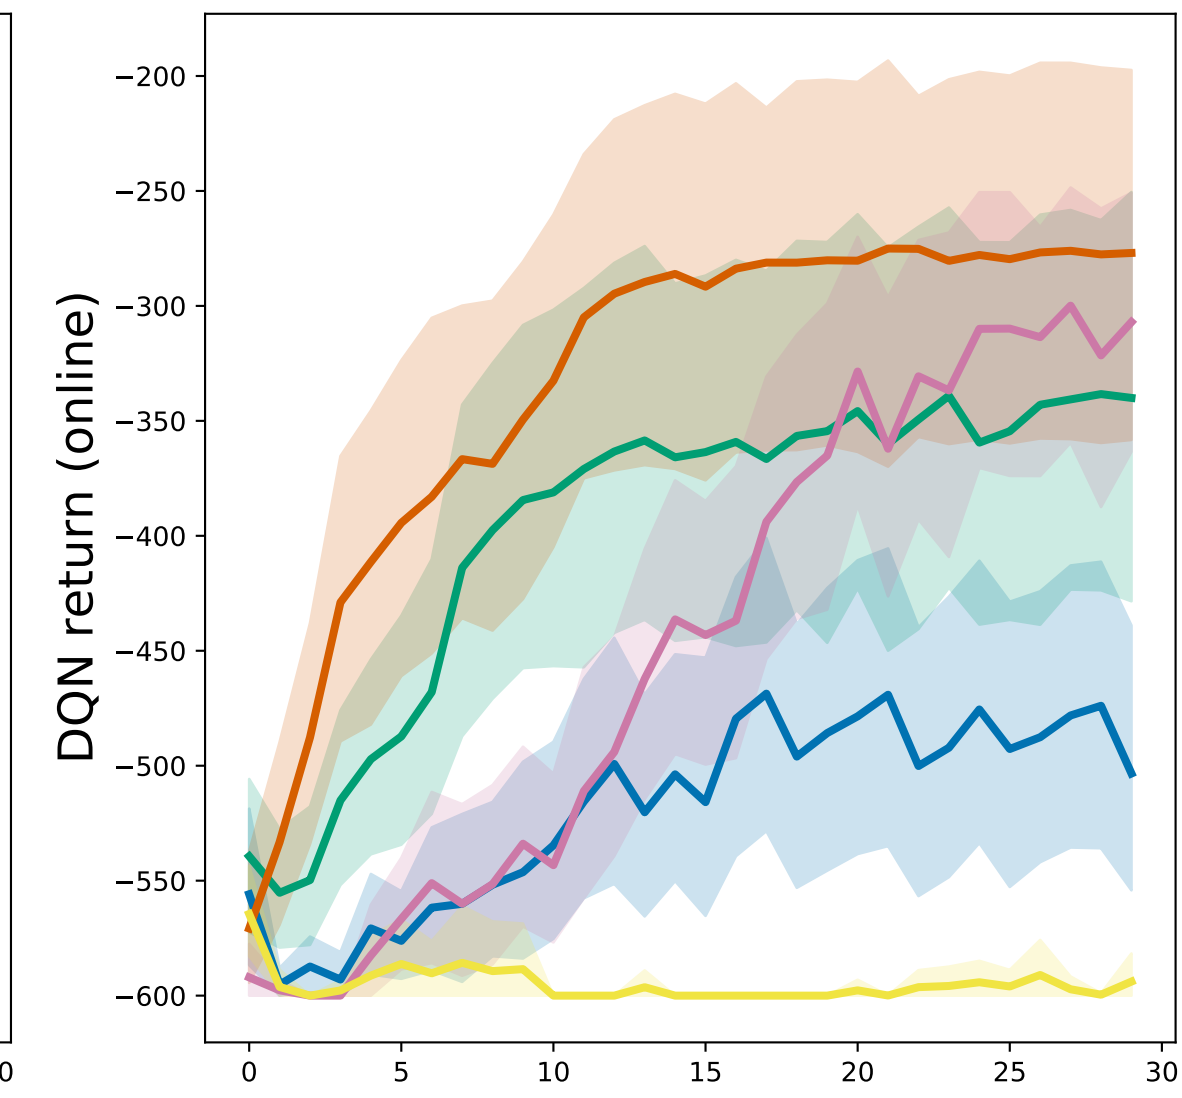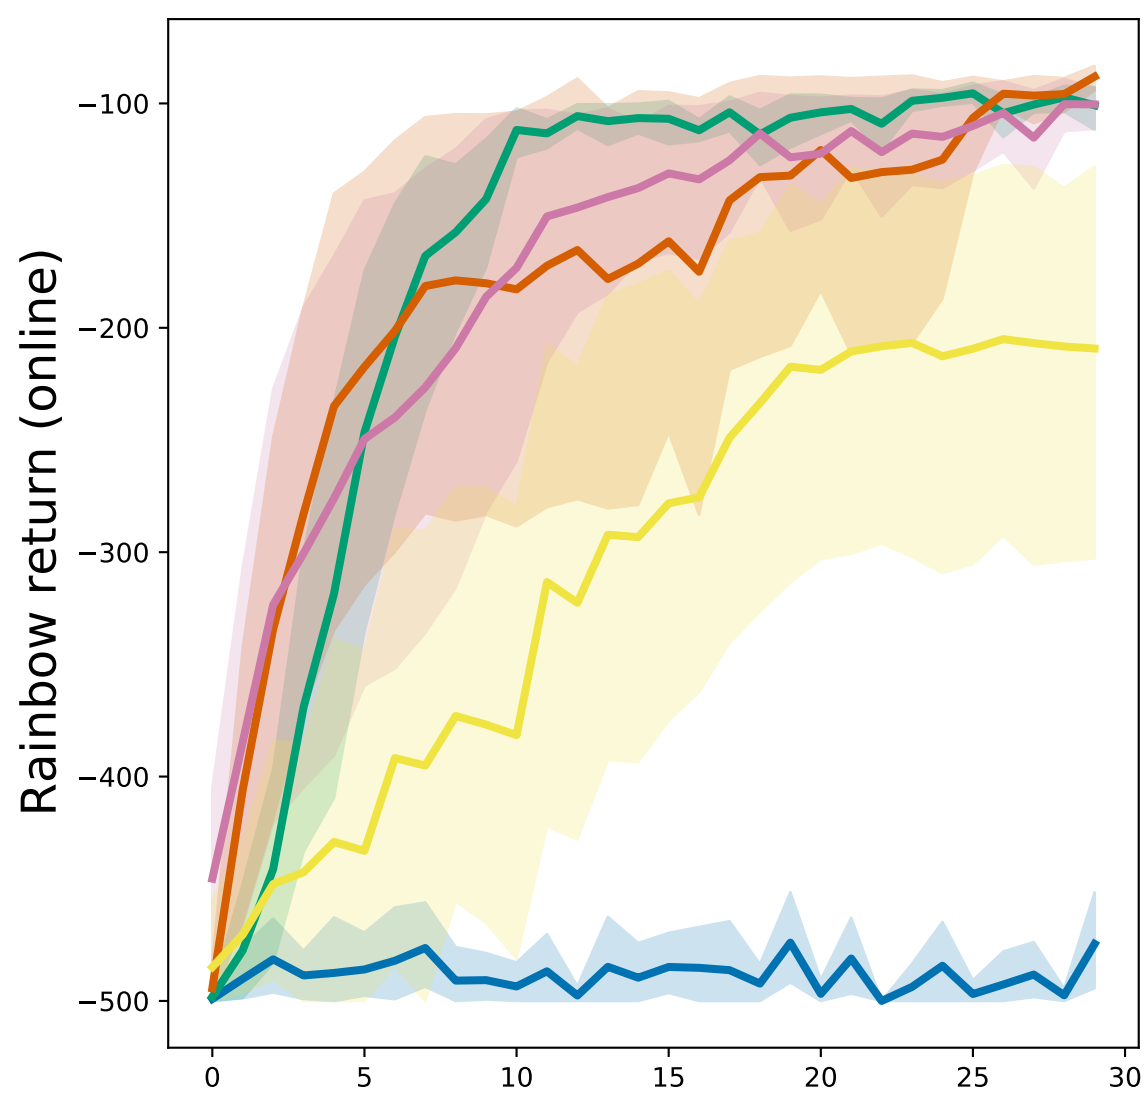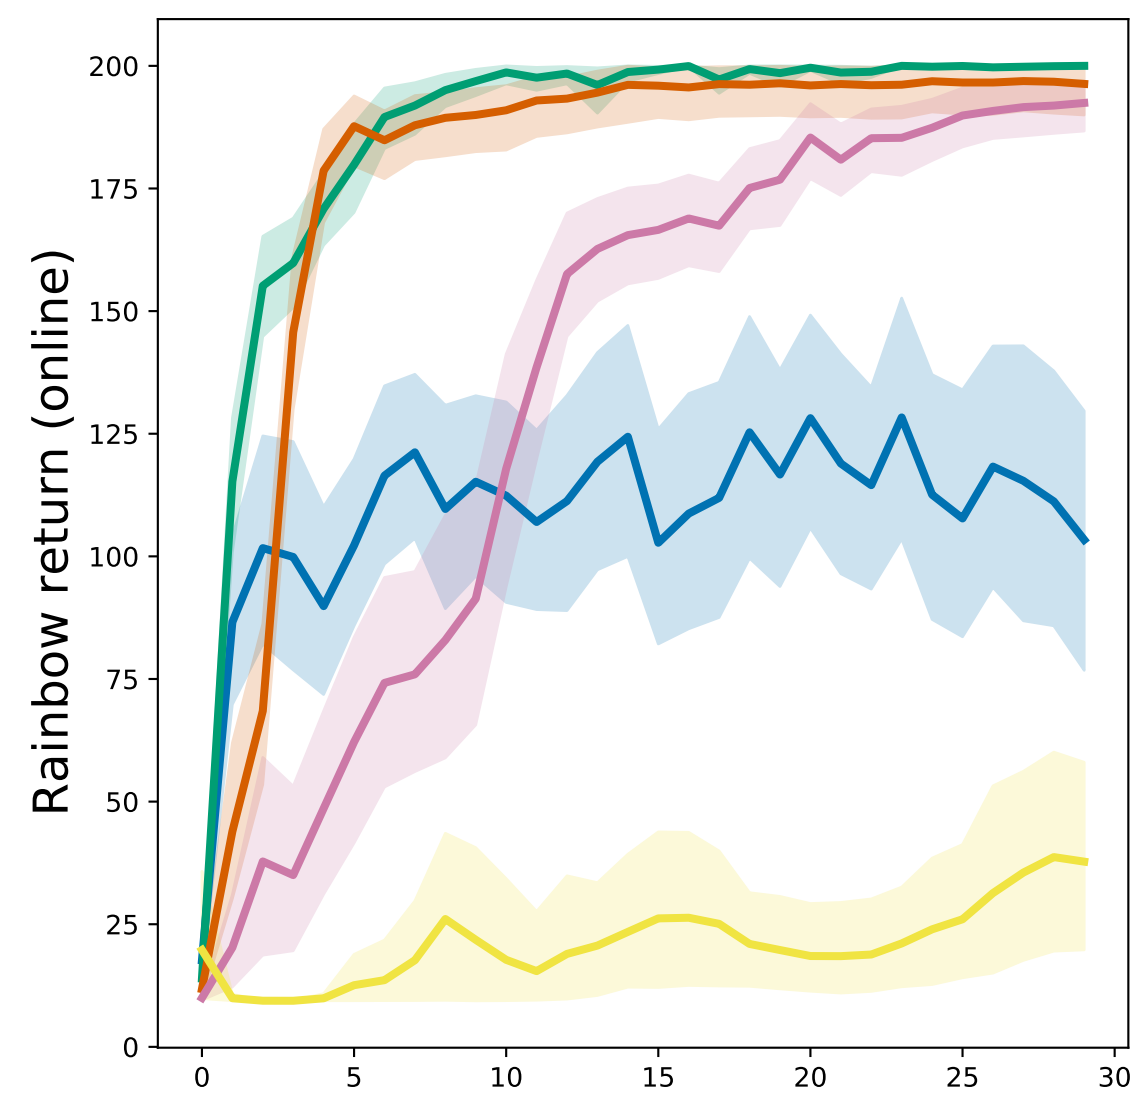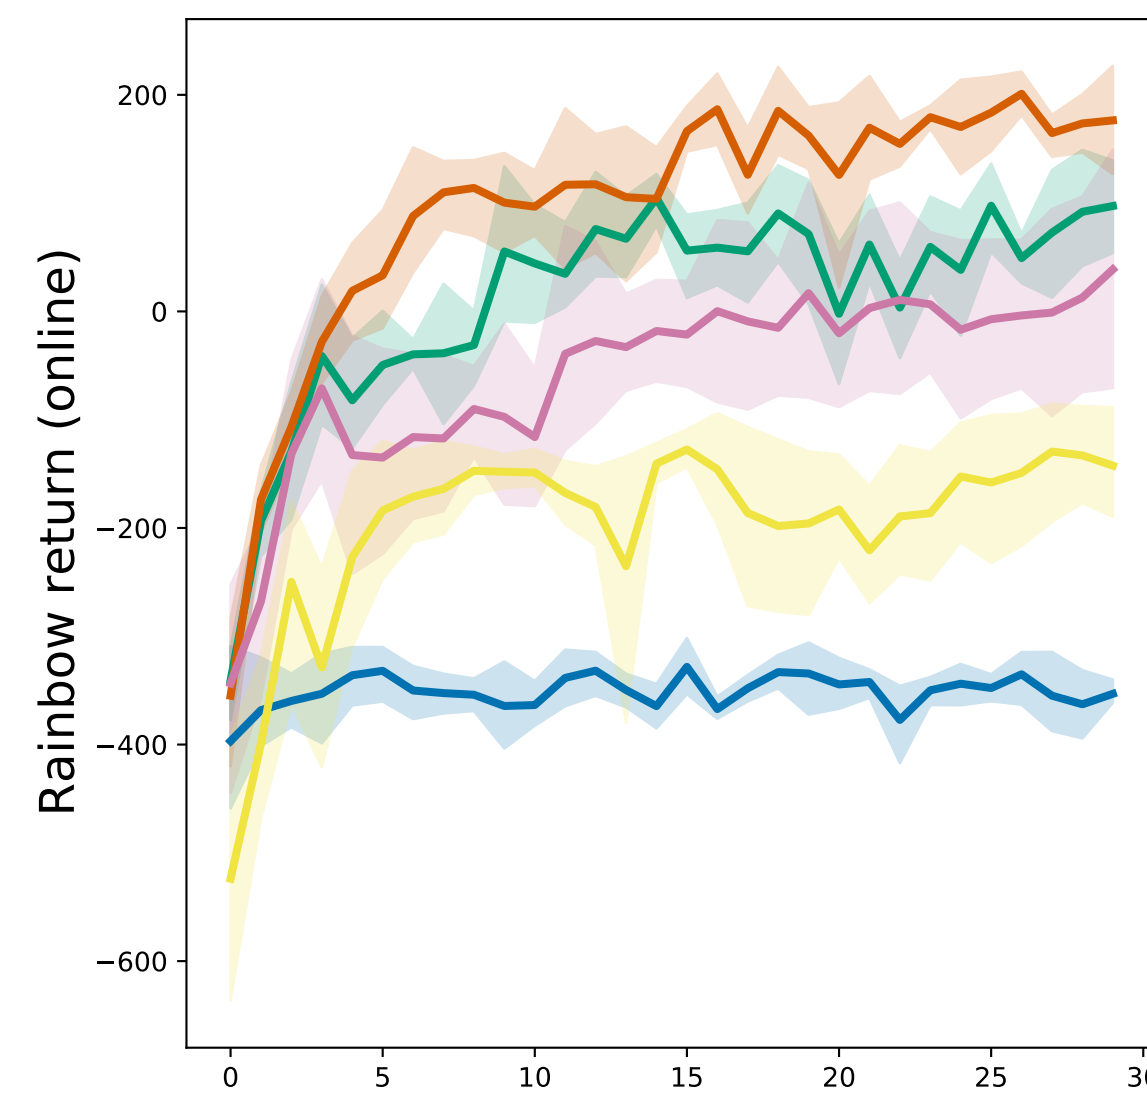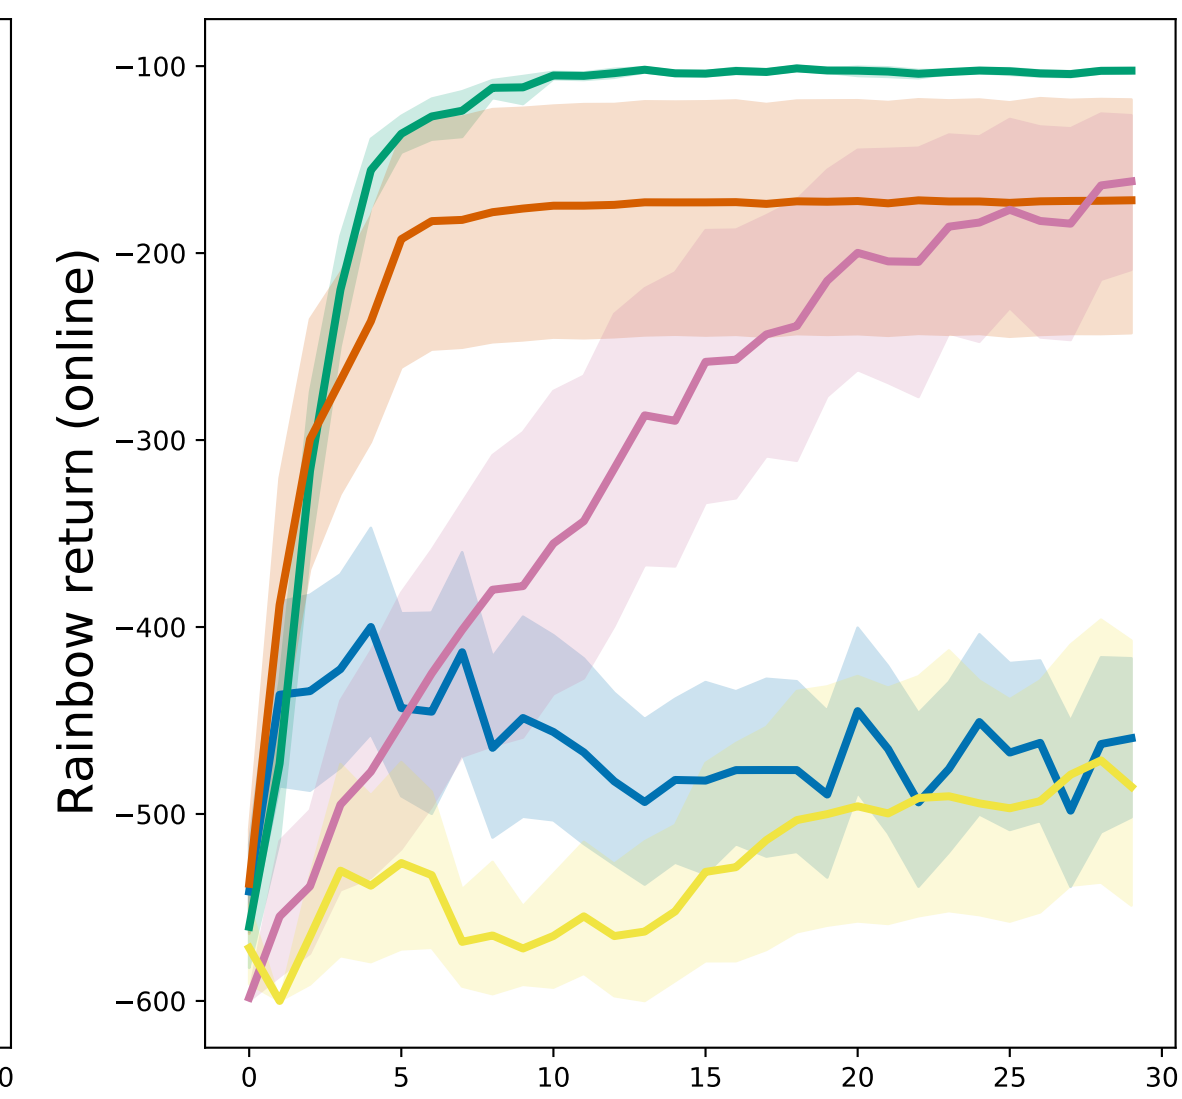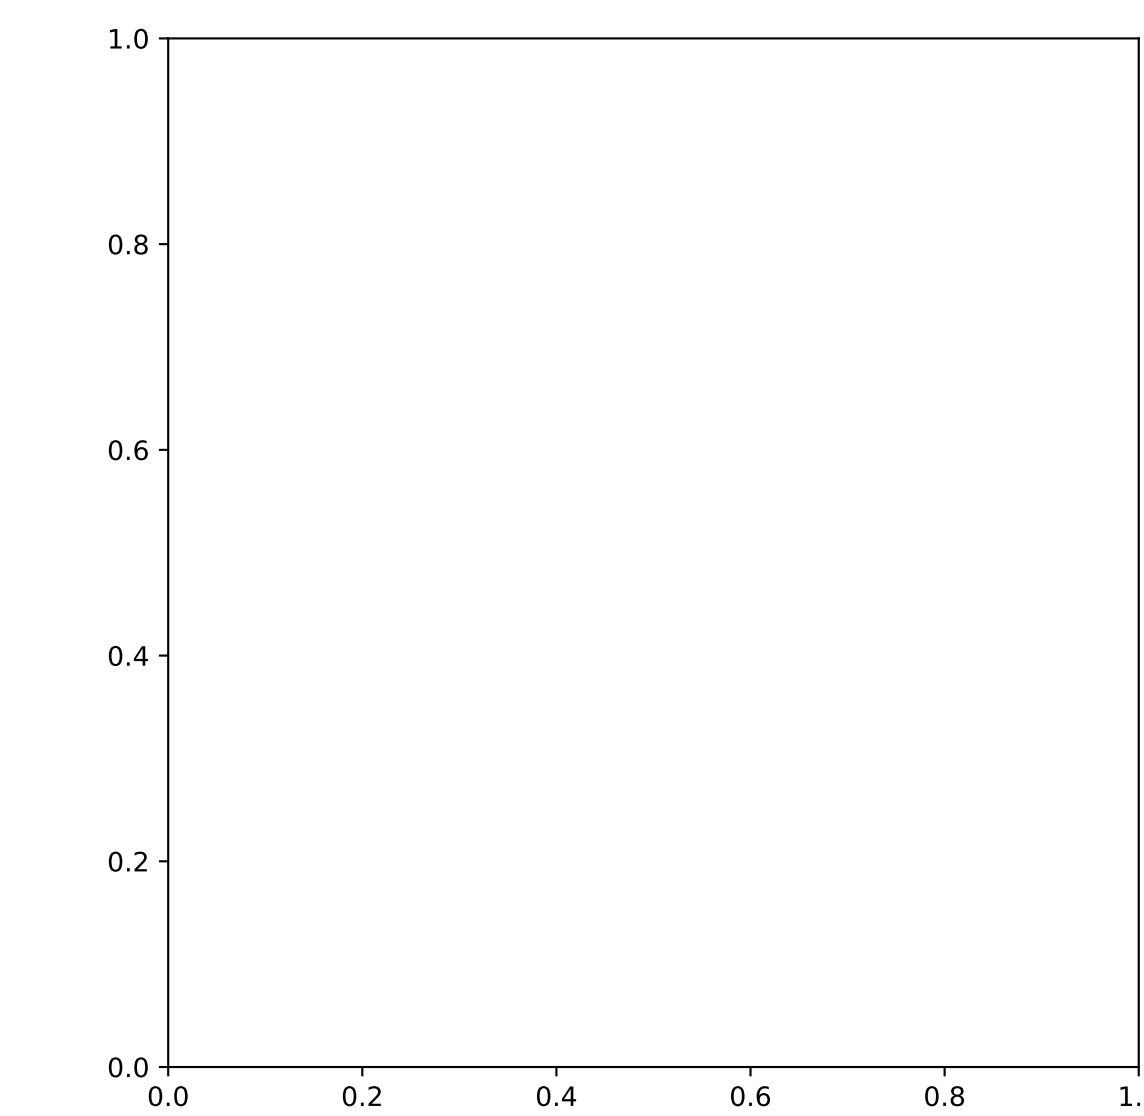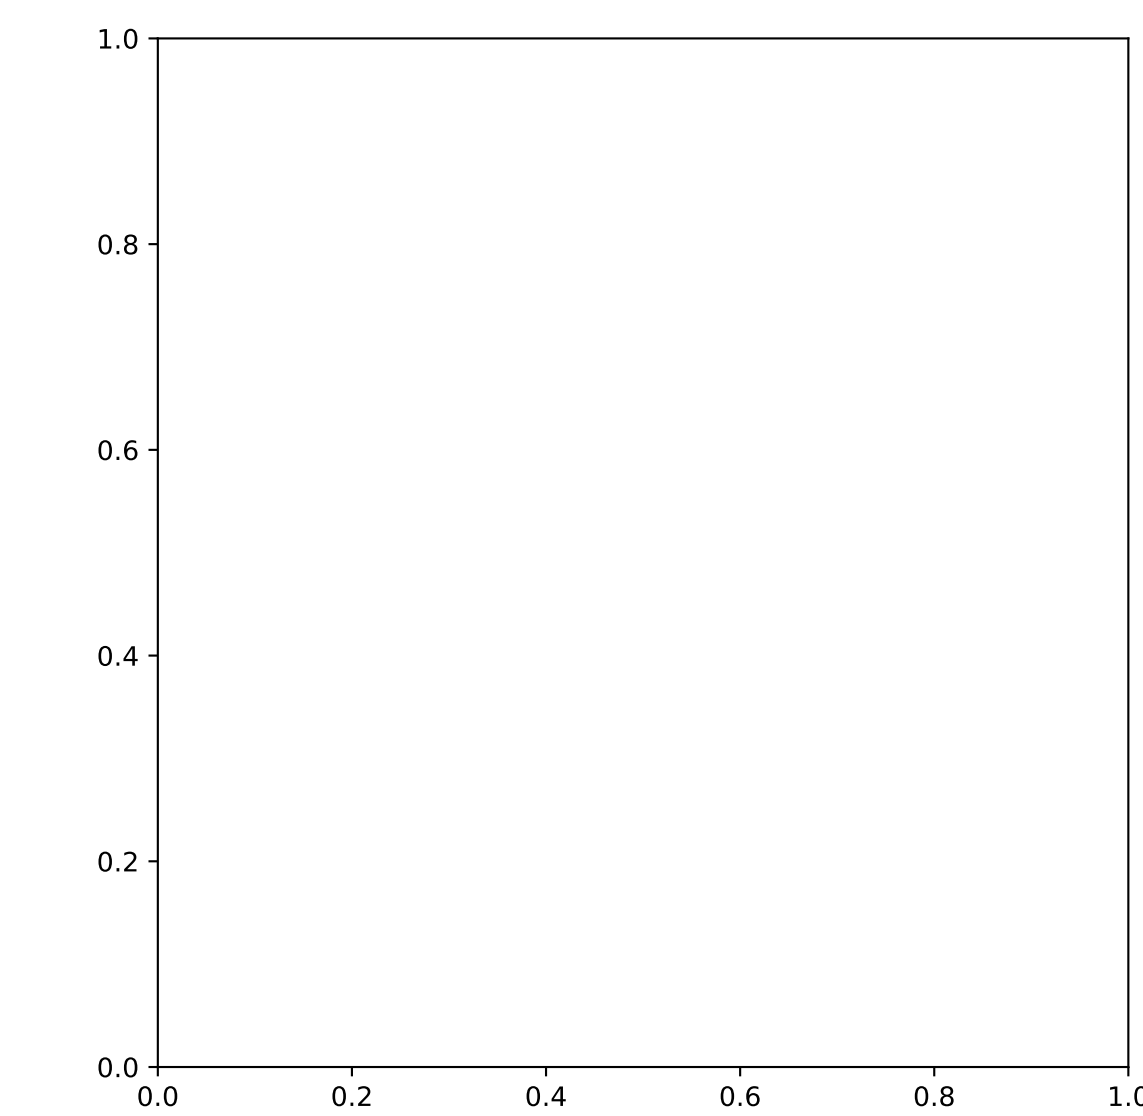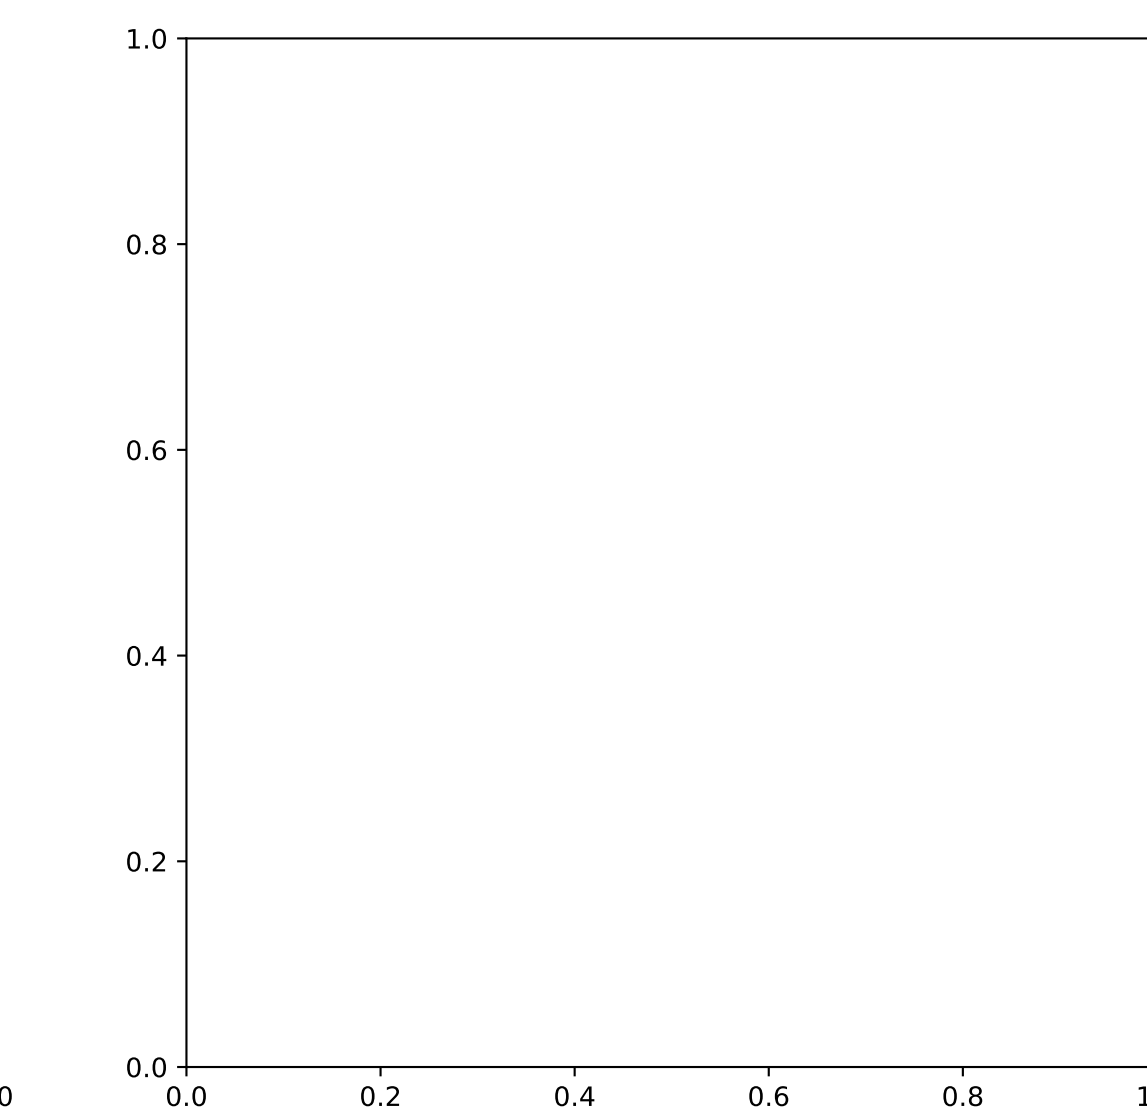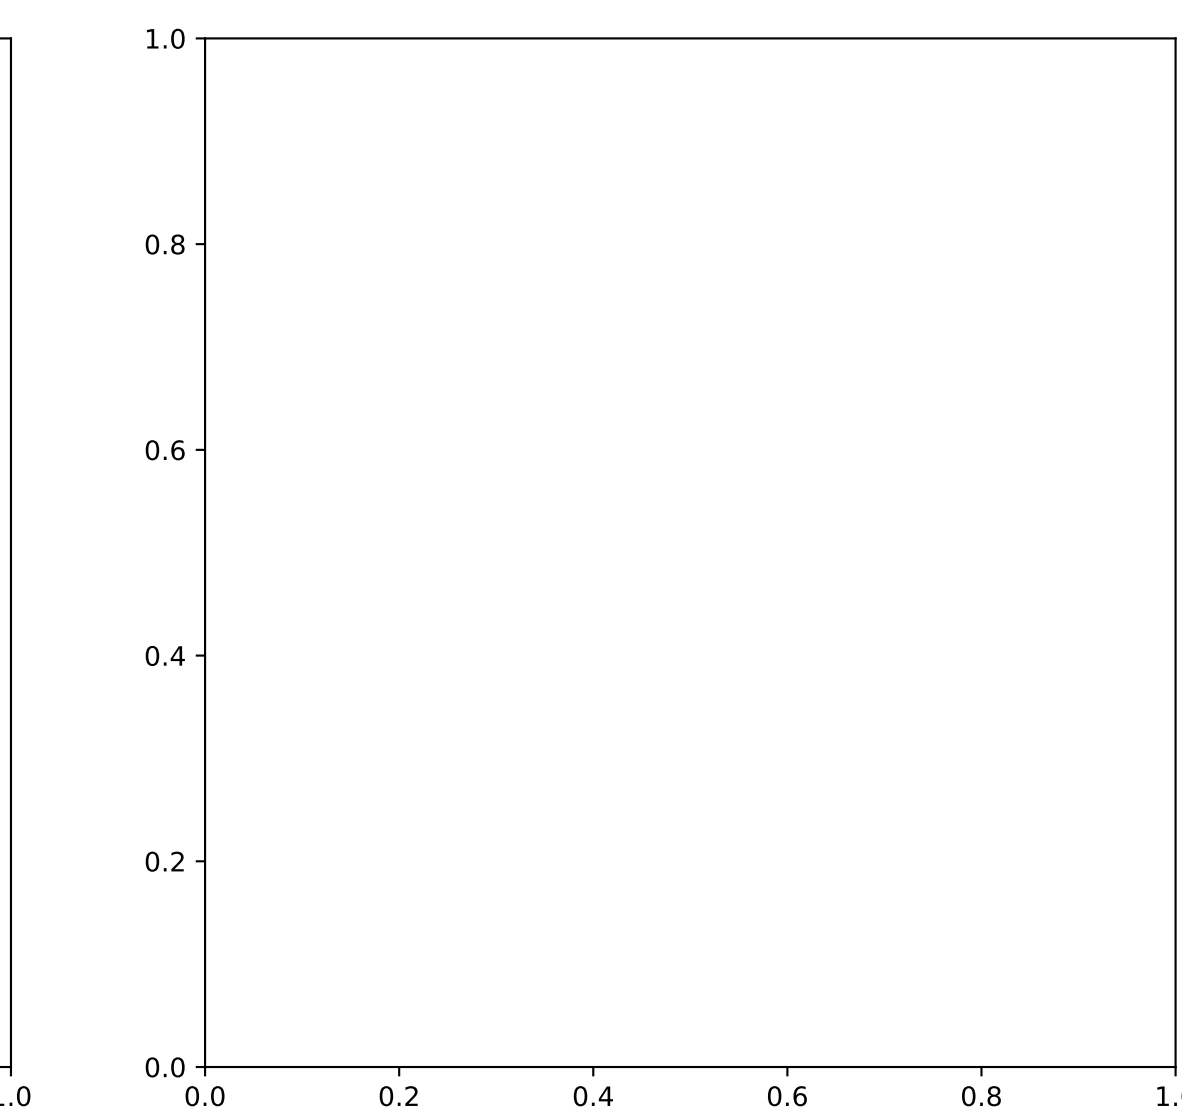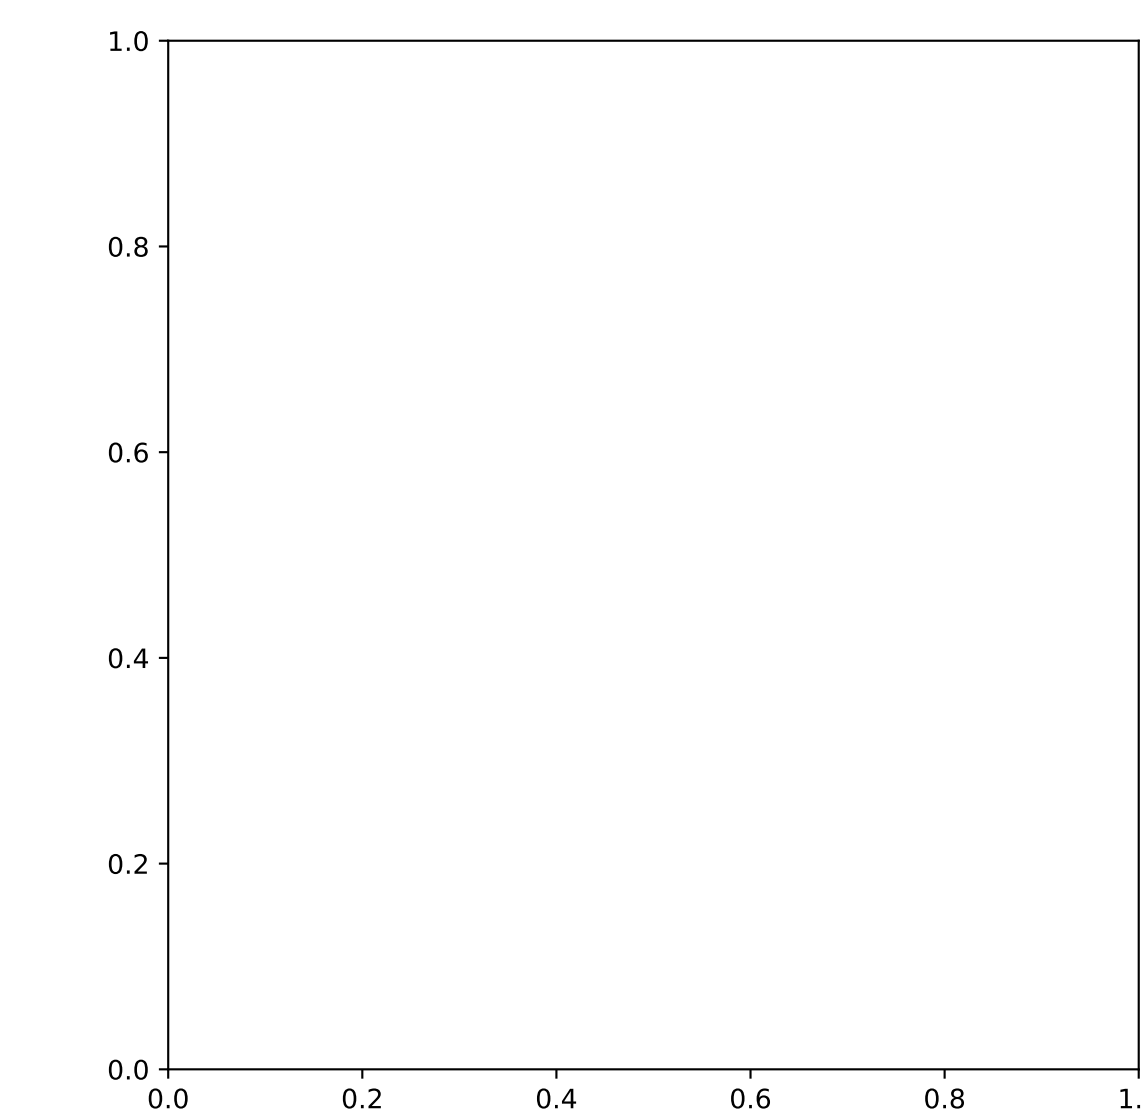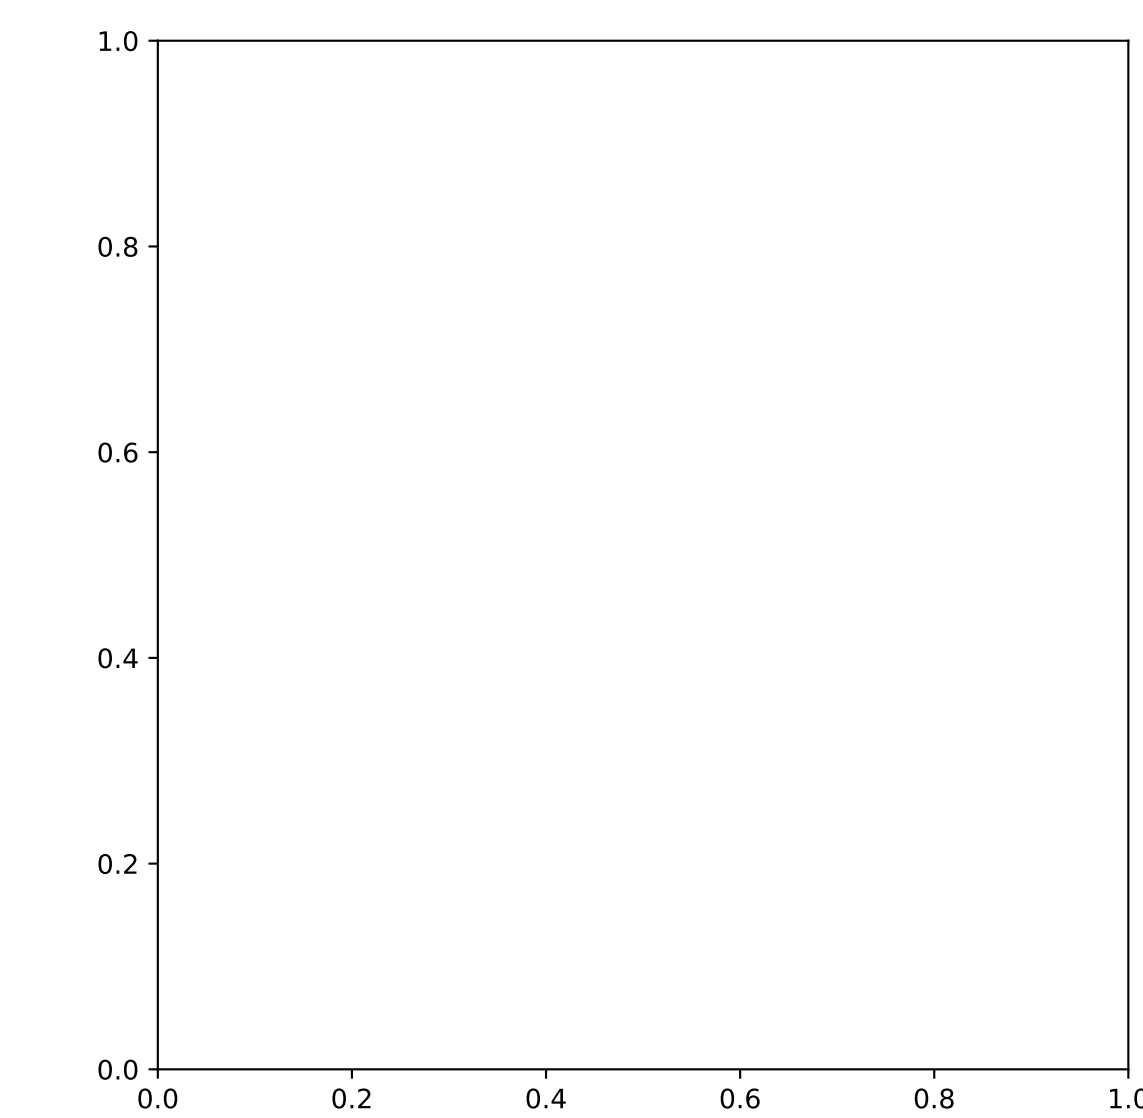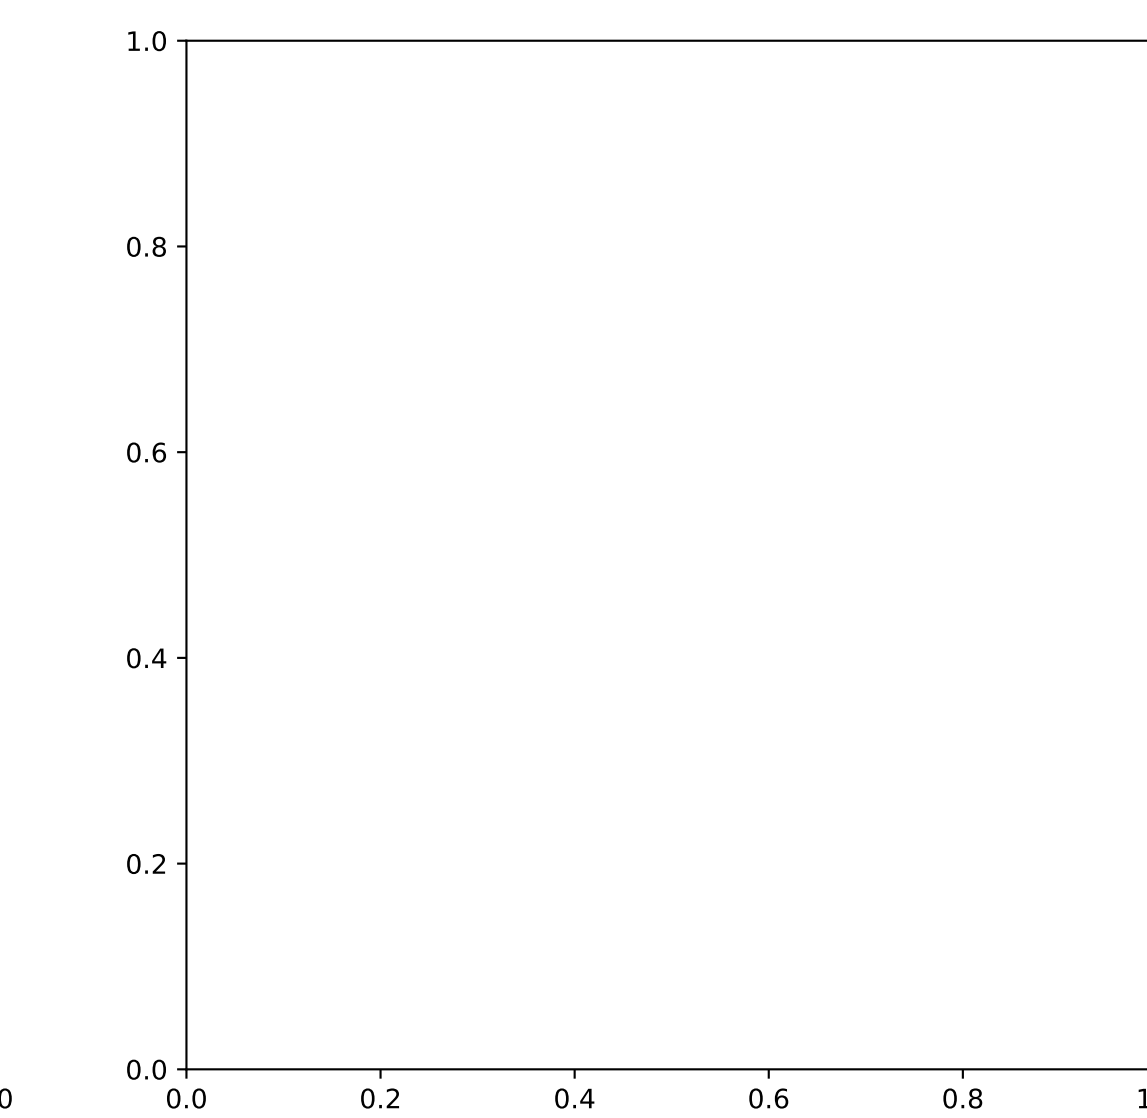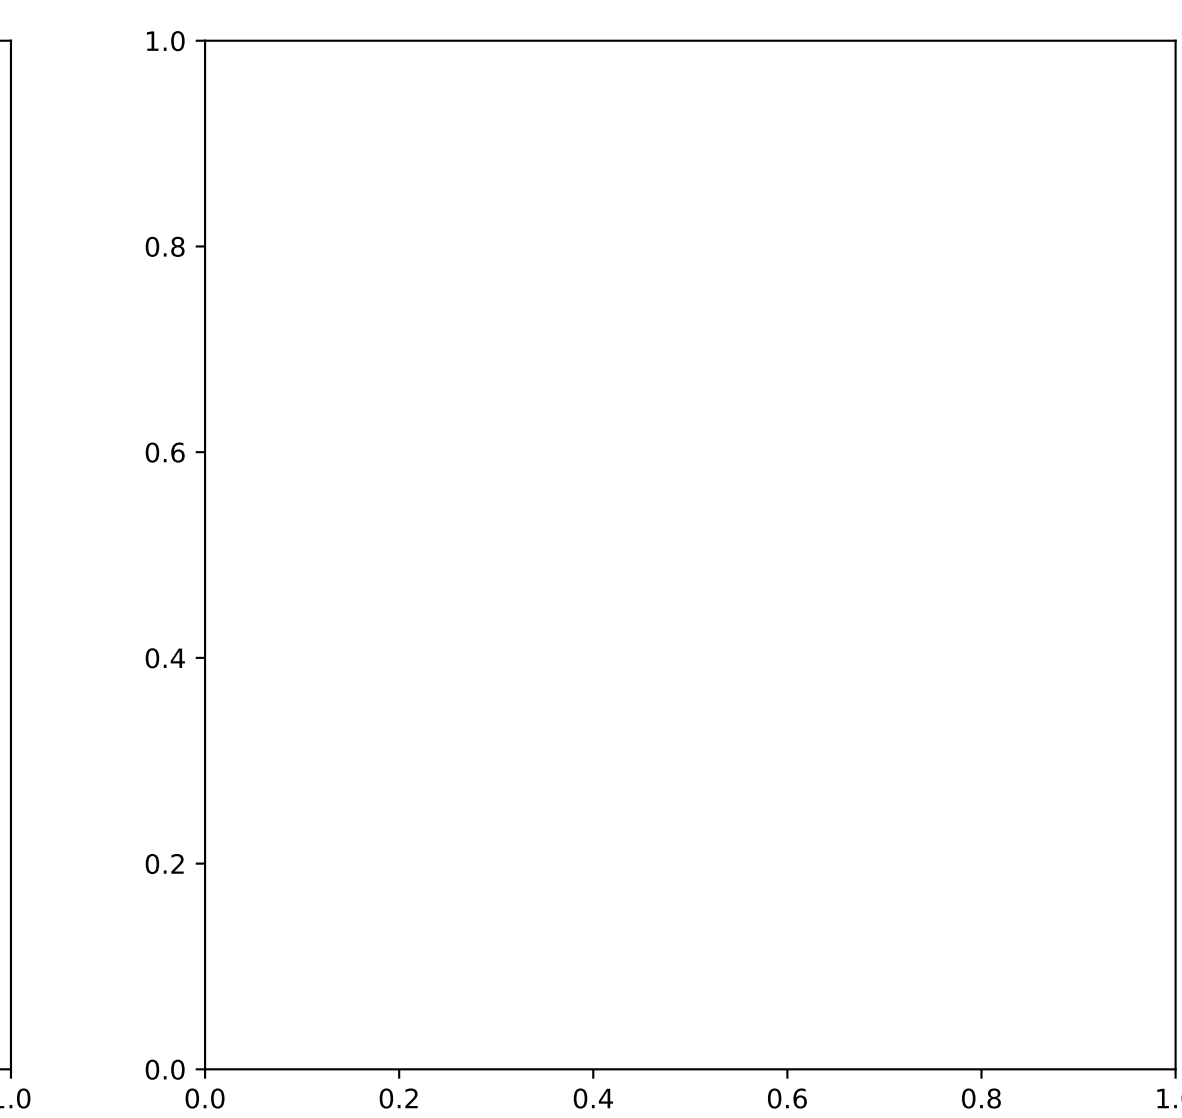

Supplement: supplementary_material [file attachment]

Acrobot

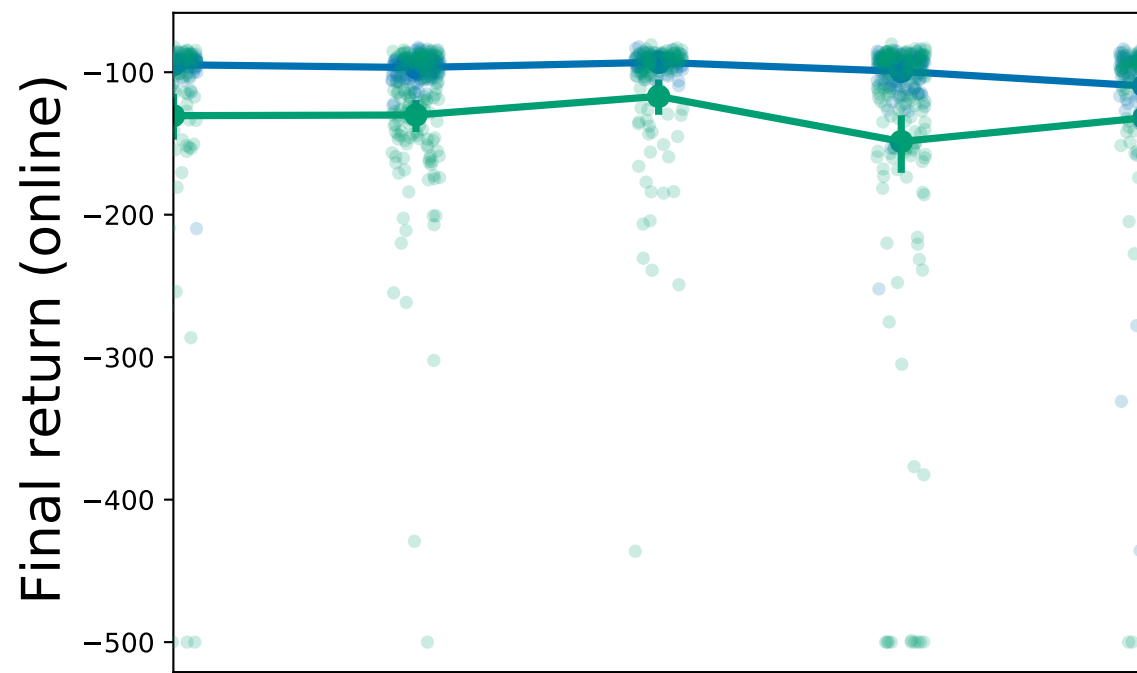

CartPole

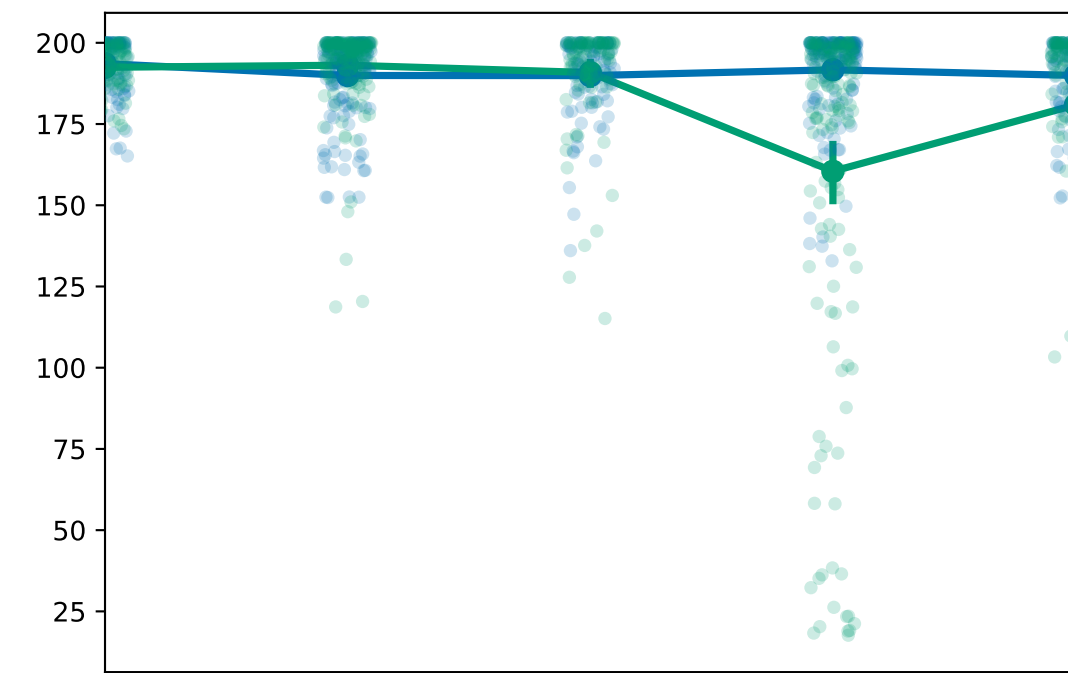

LunarLander

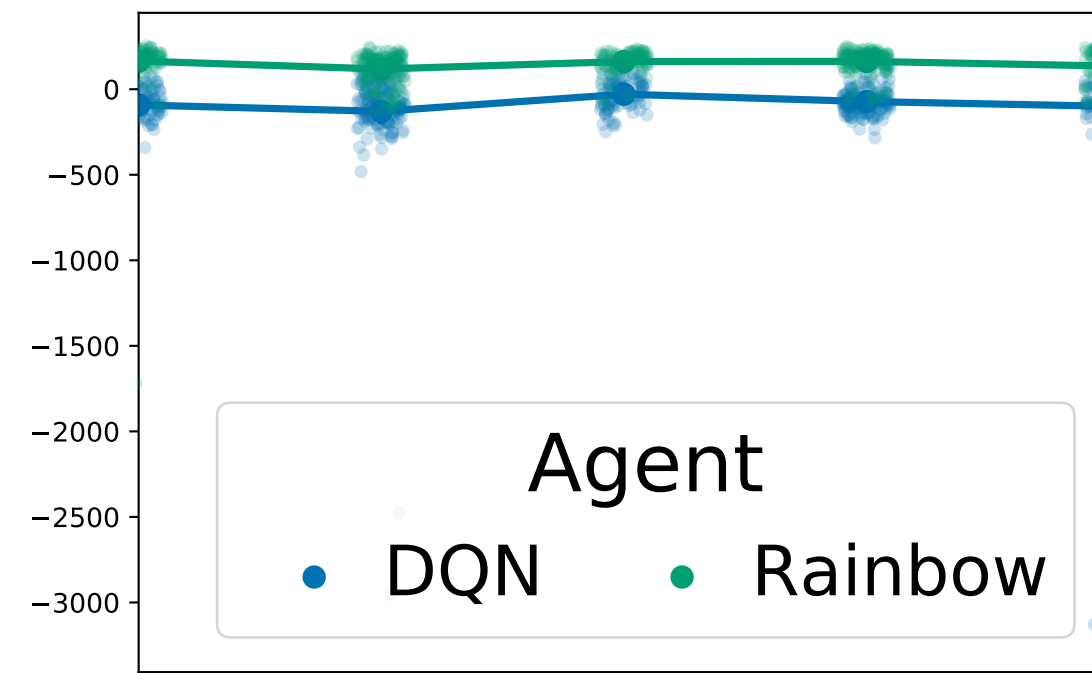

MountainCar

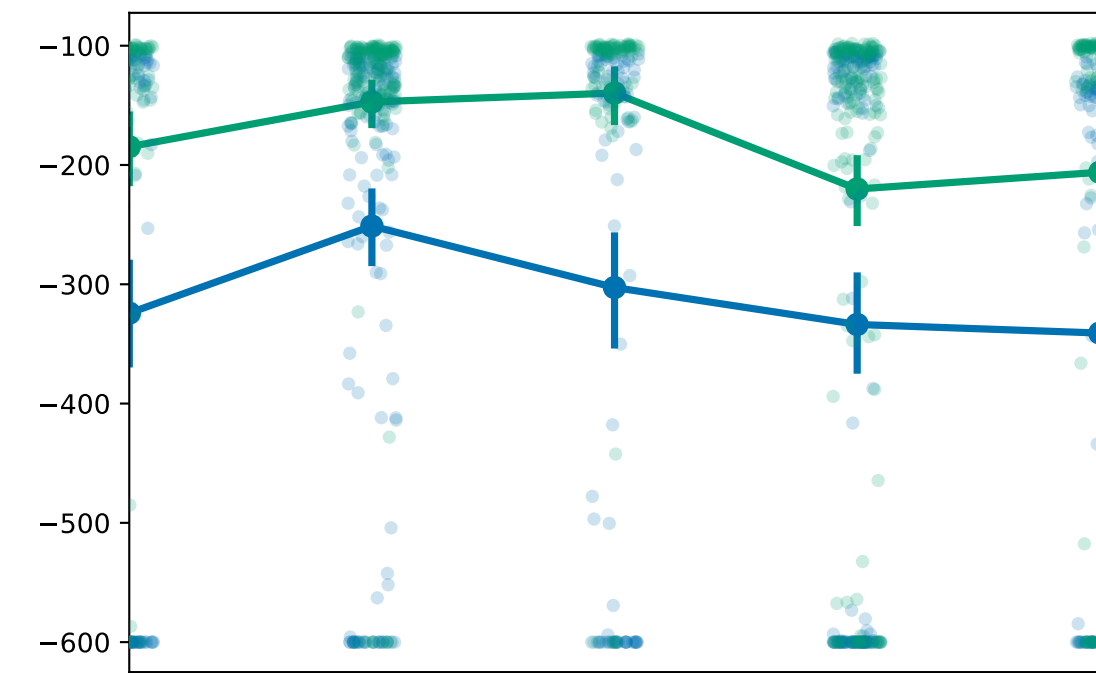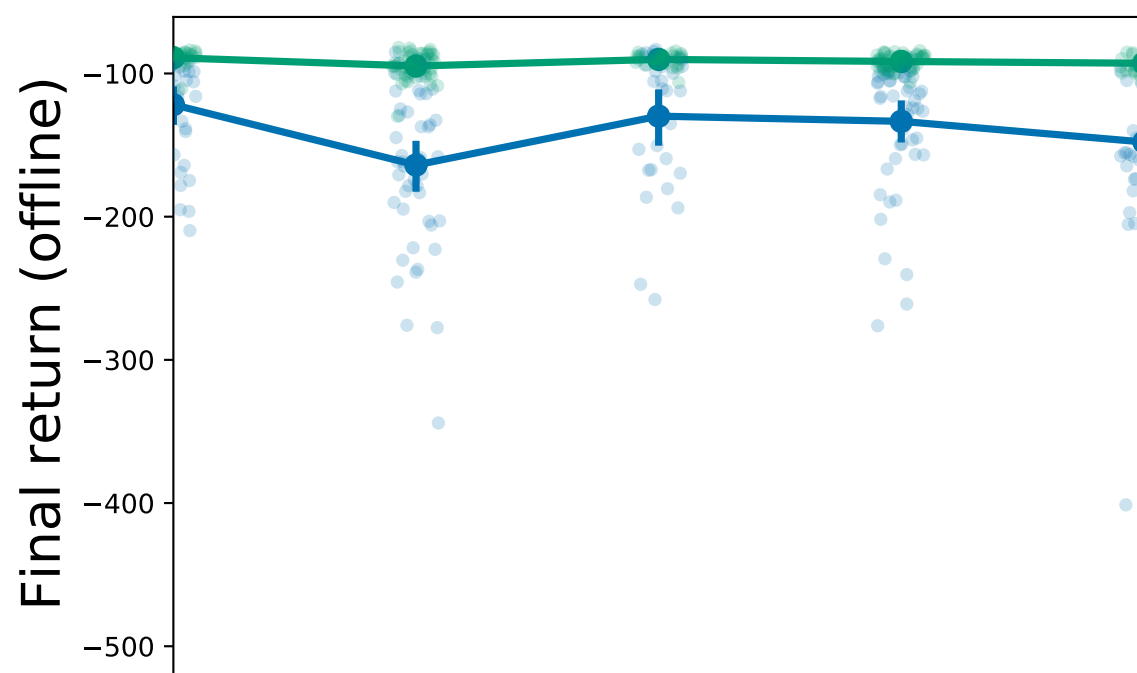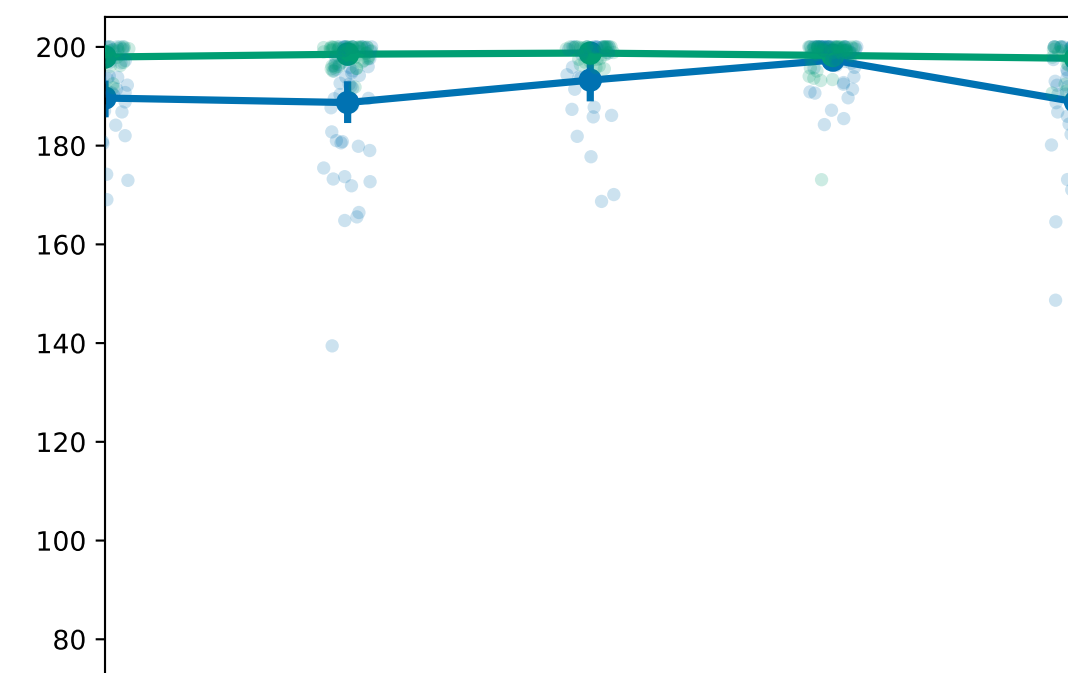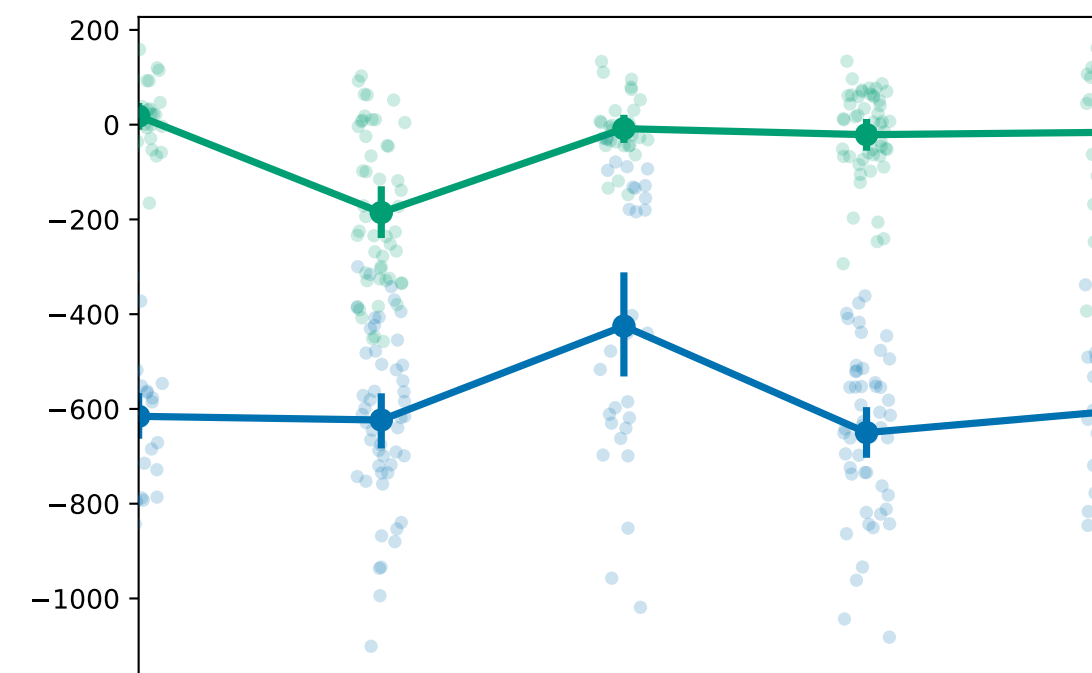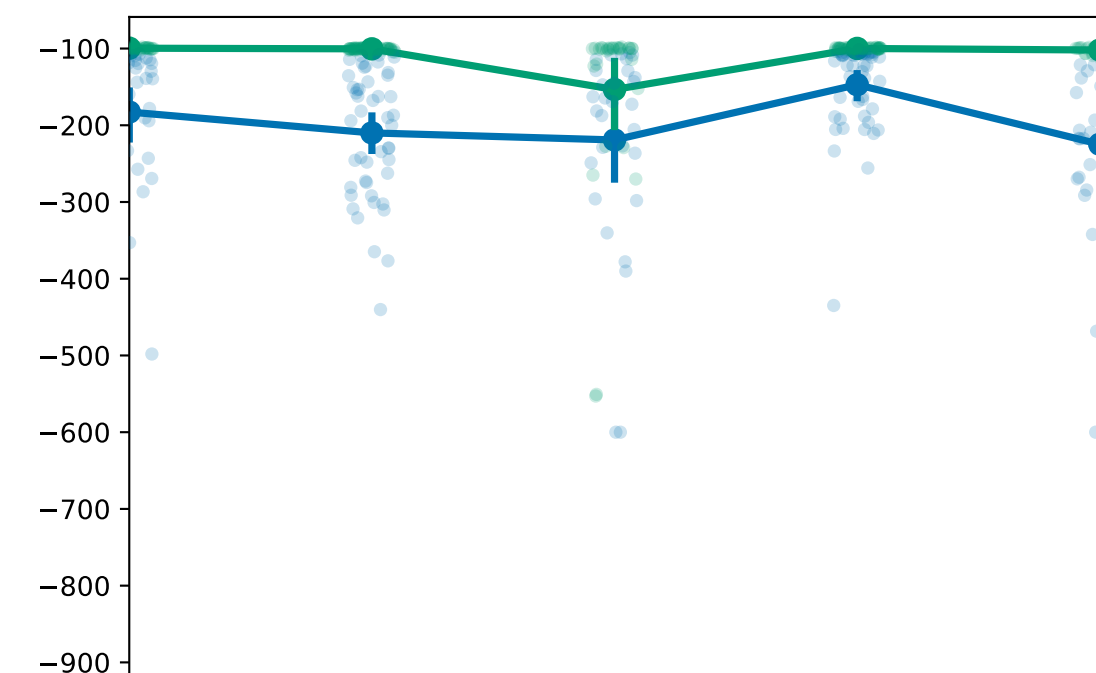

Supplement: supplementary_material [file attachment]

Acrobot

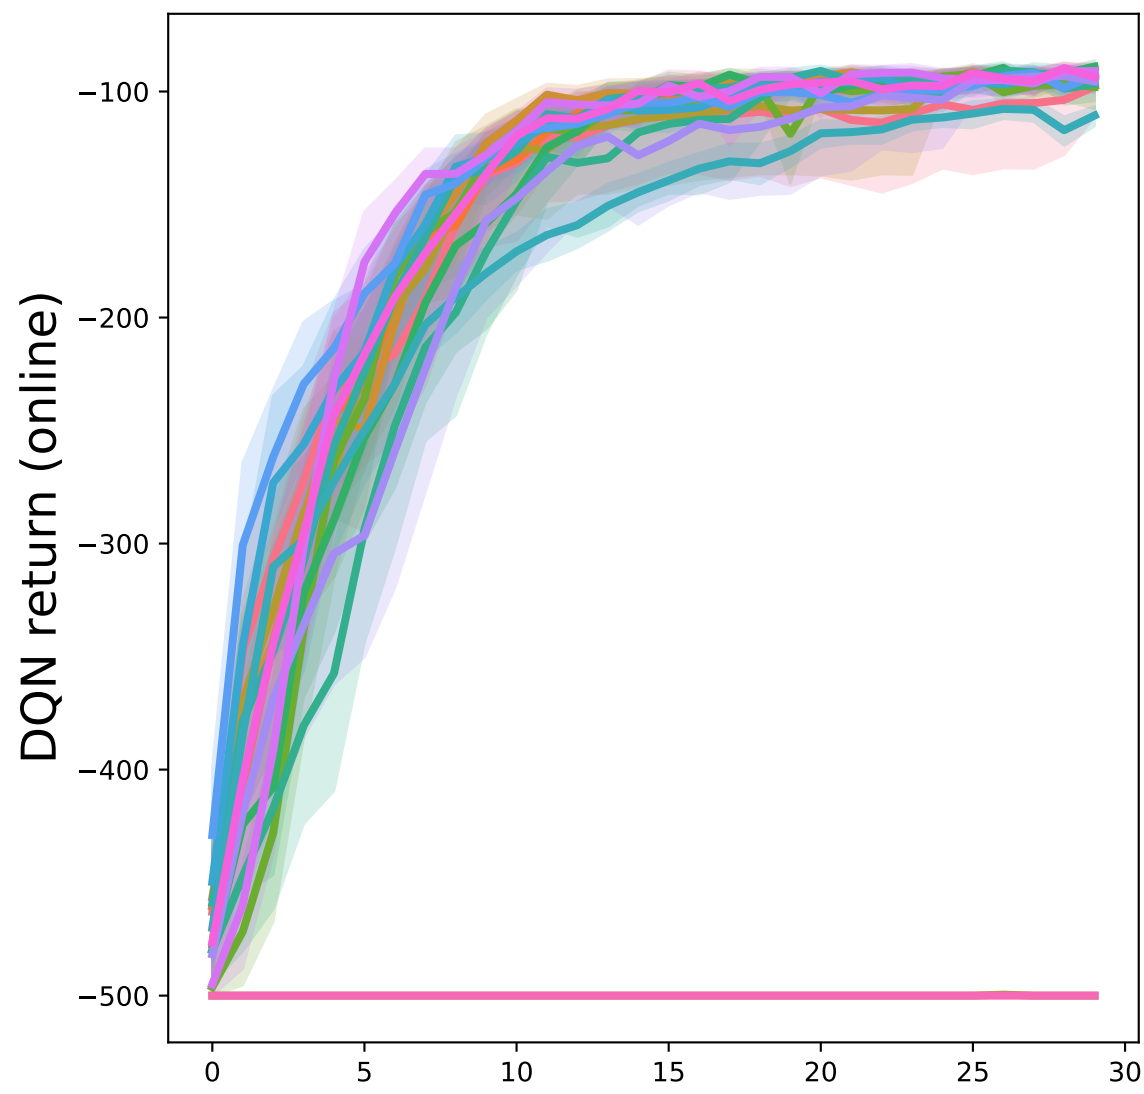

CartPole

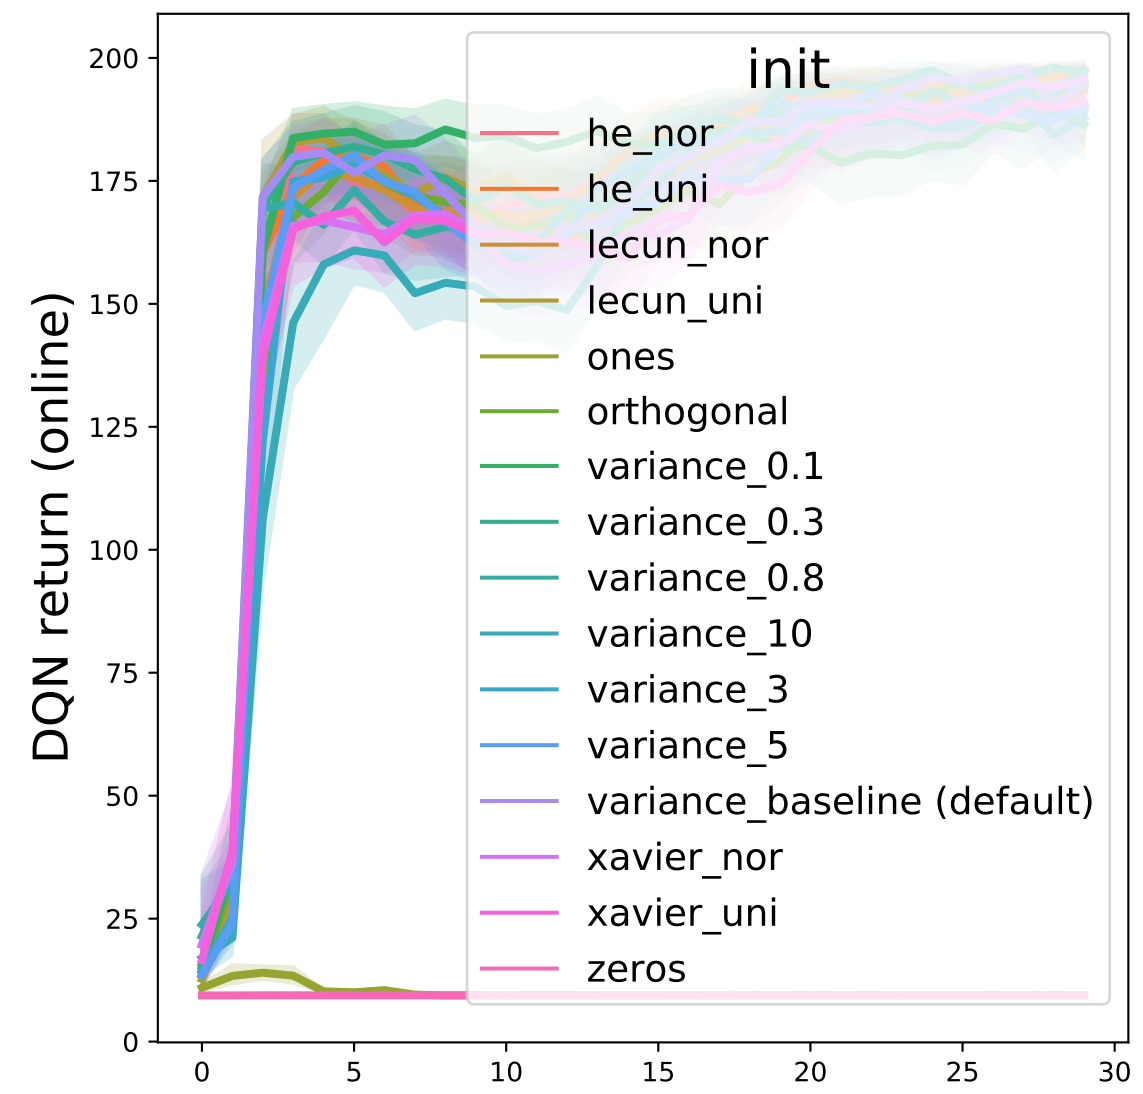

LunarLander

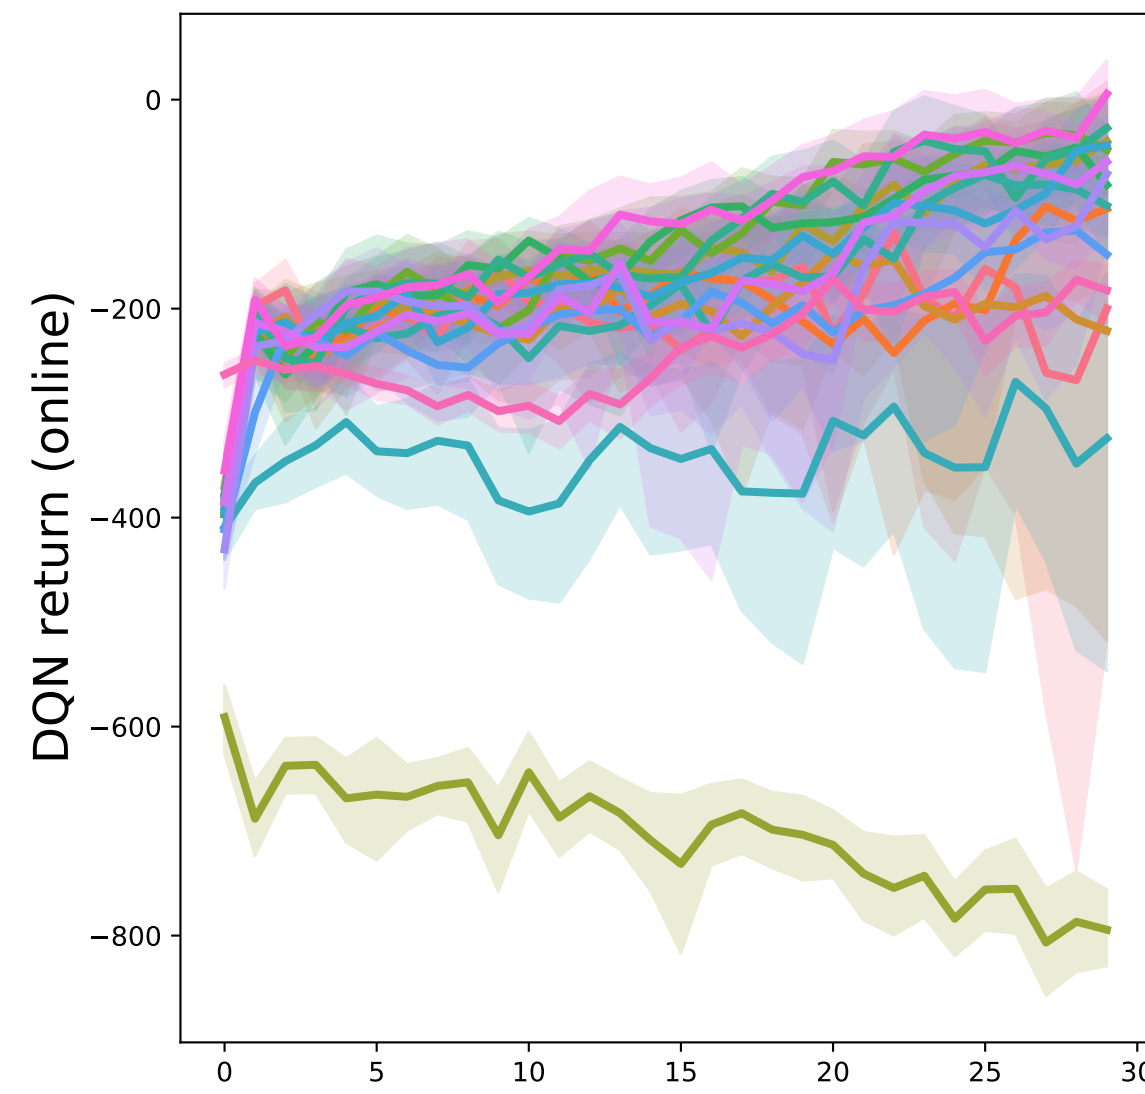

MountainCar

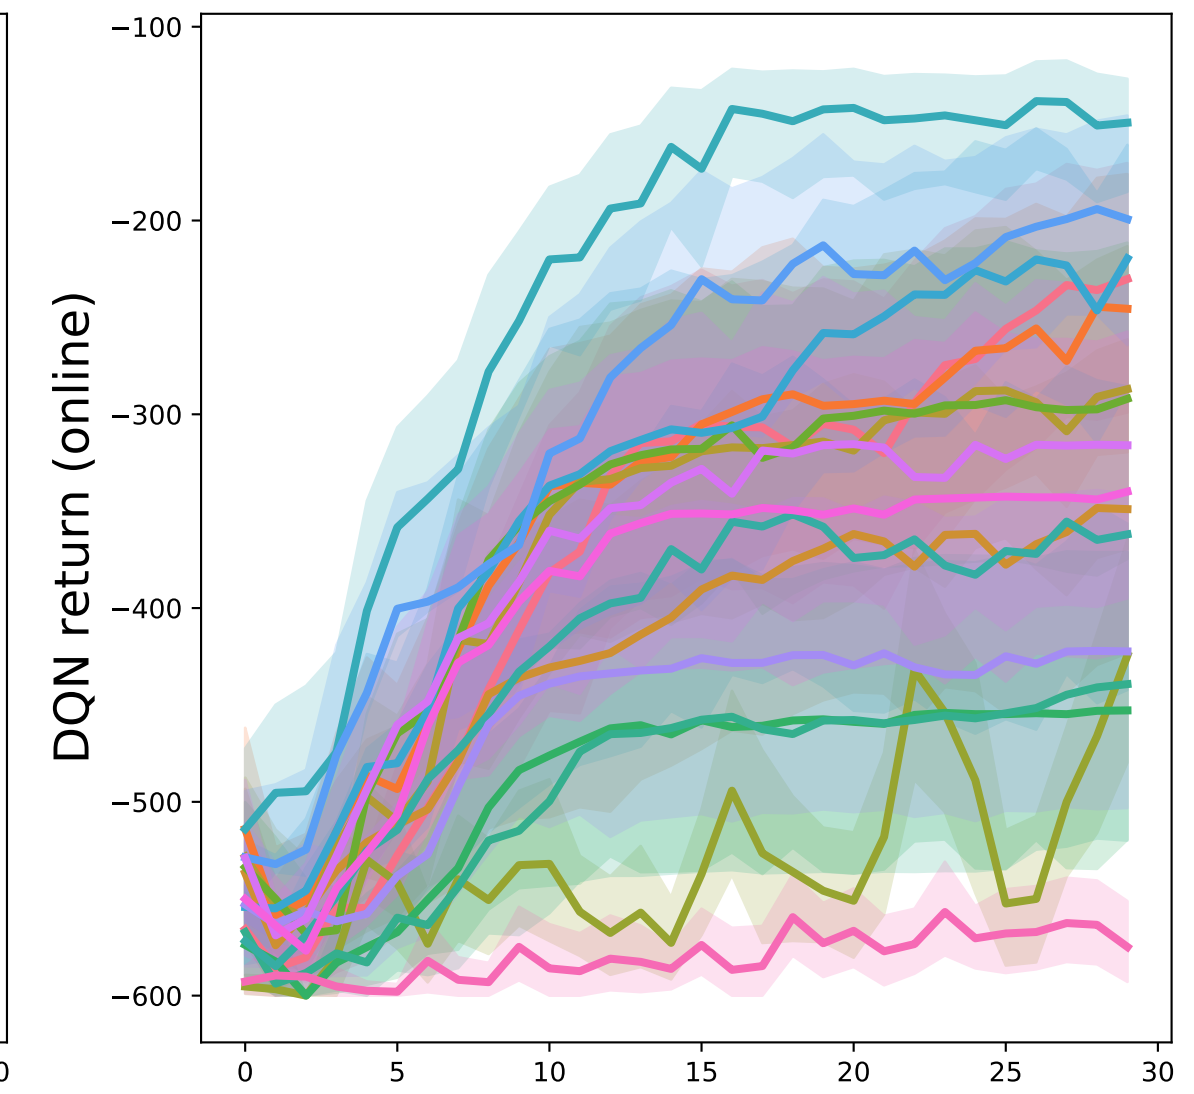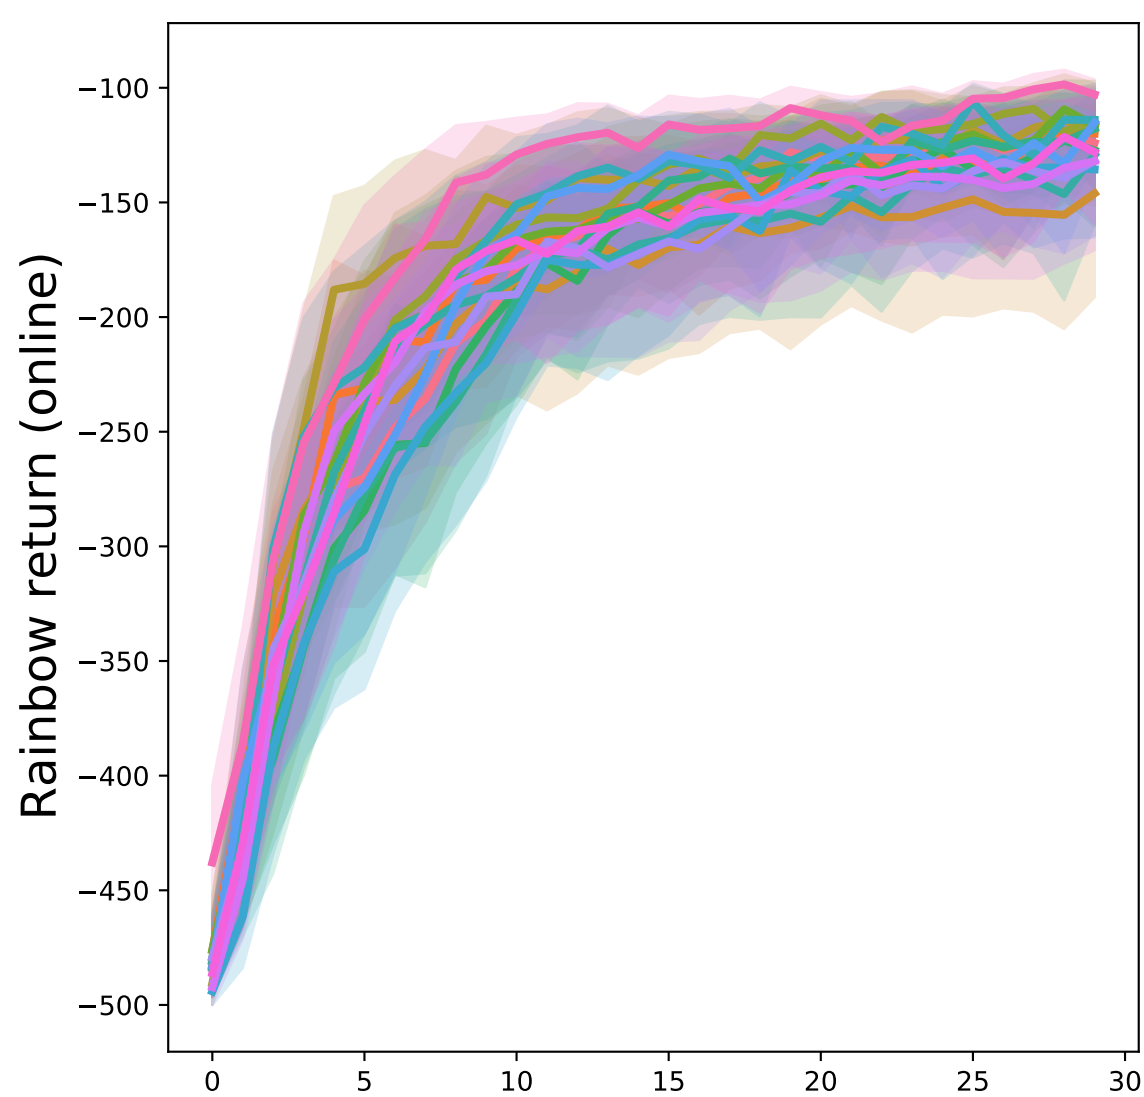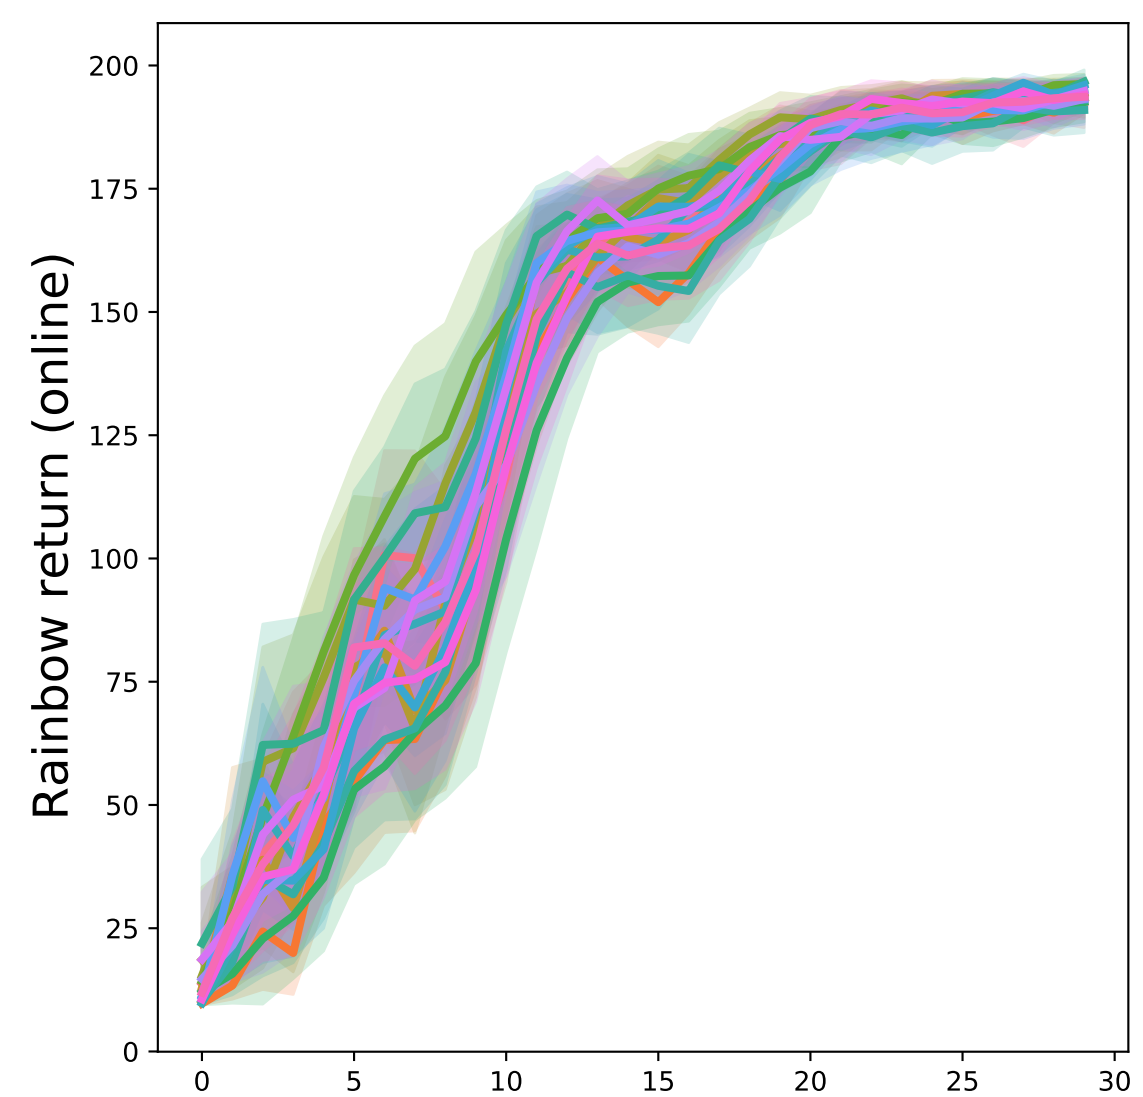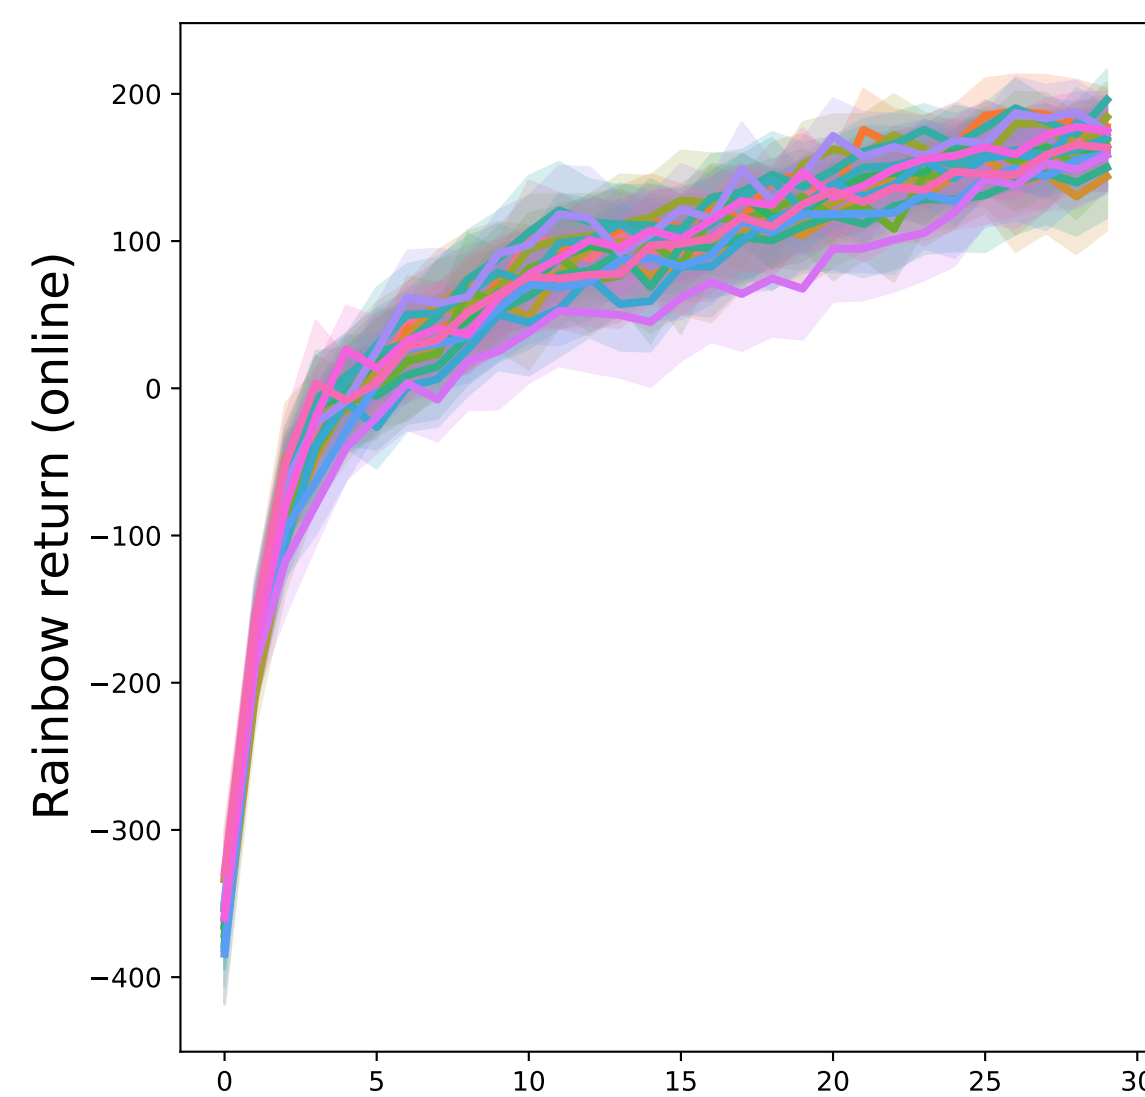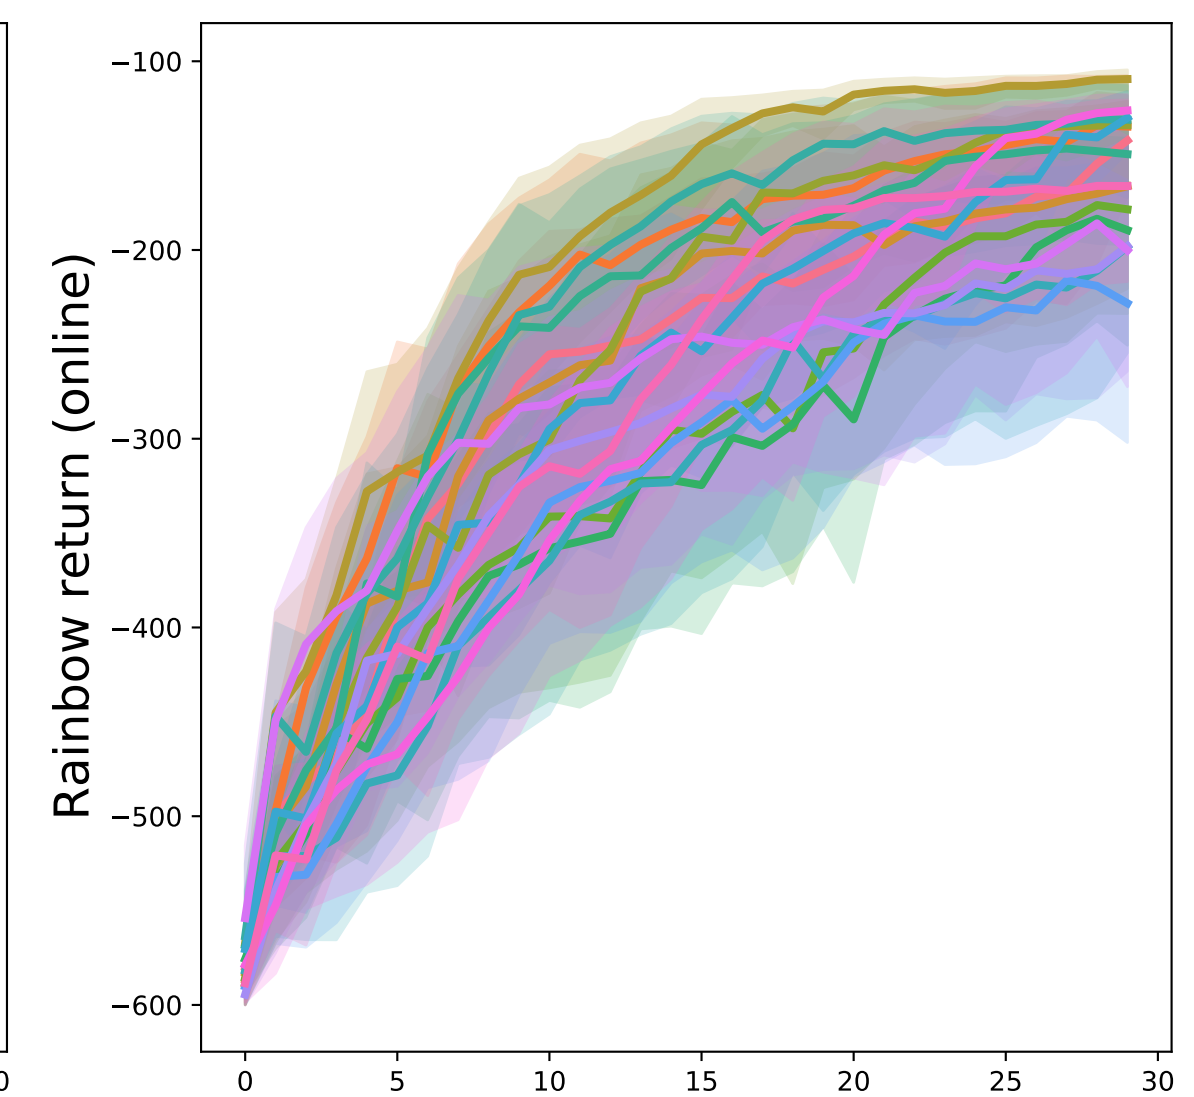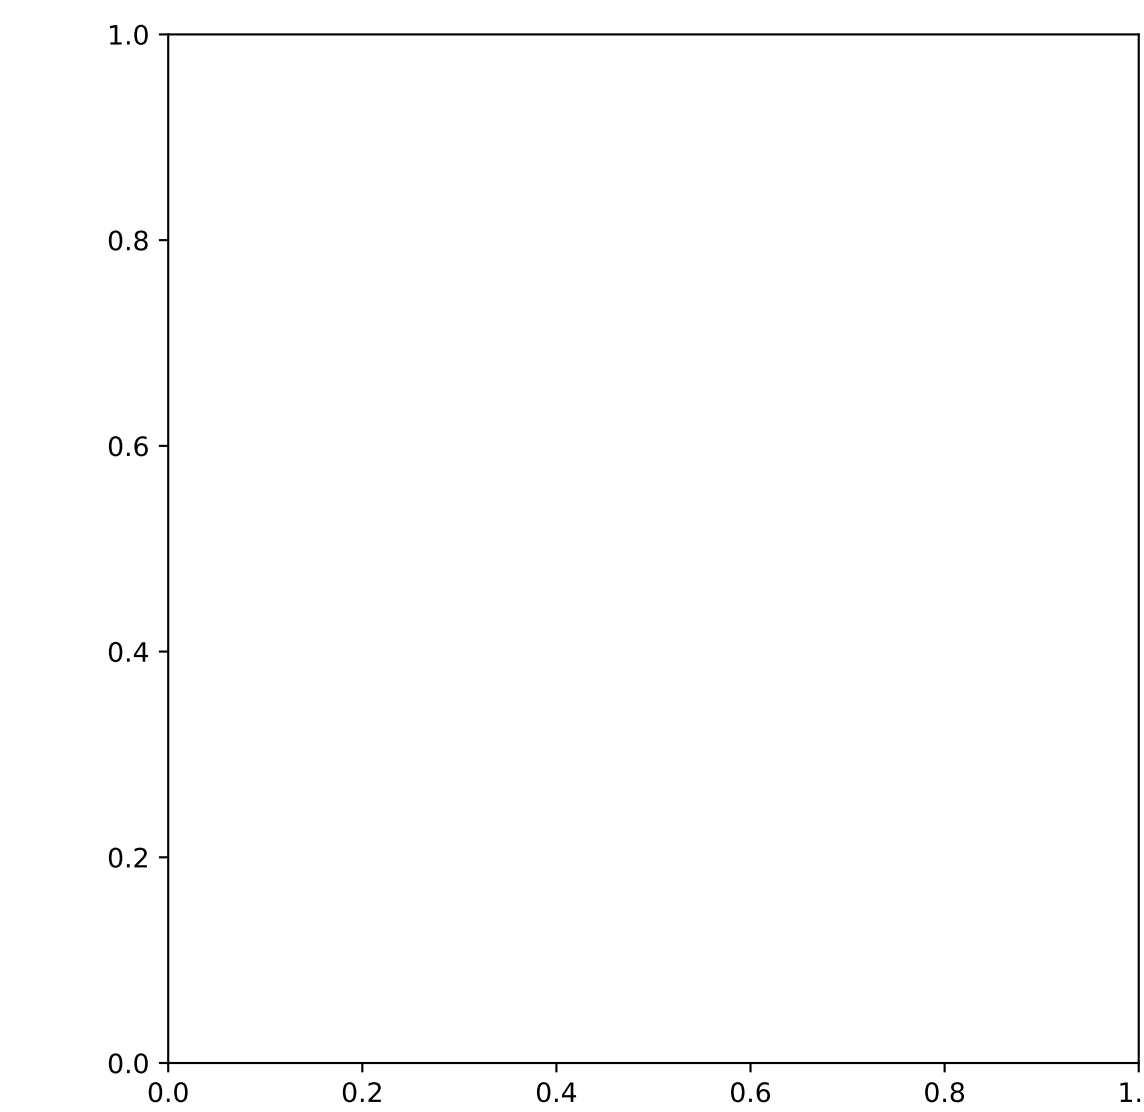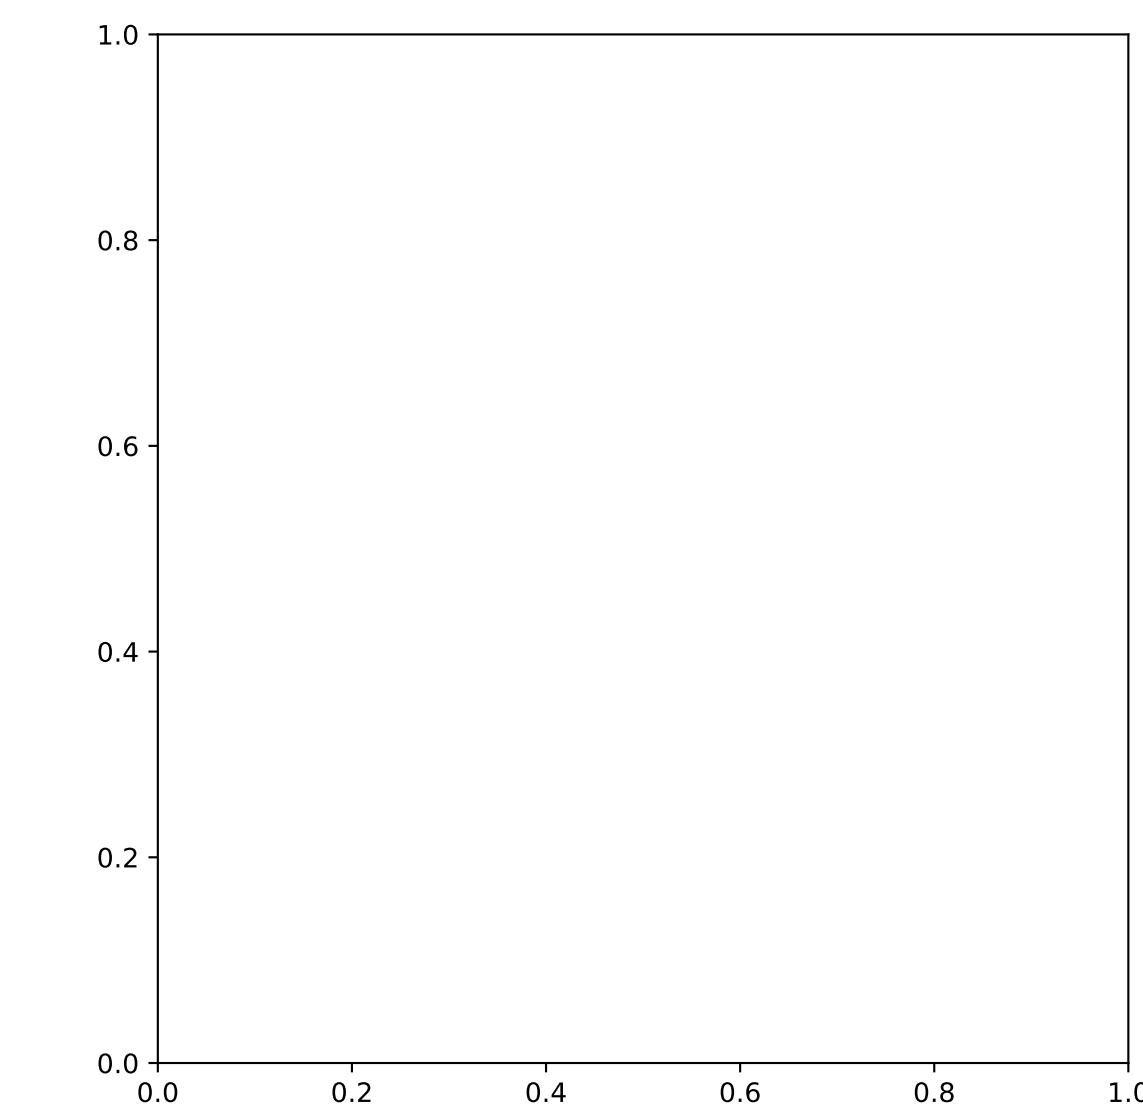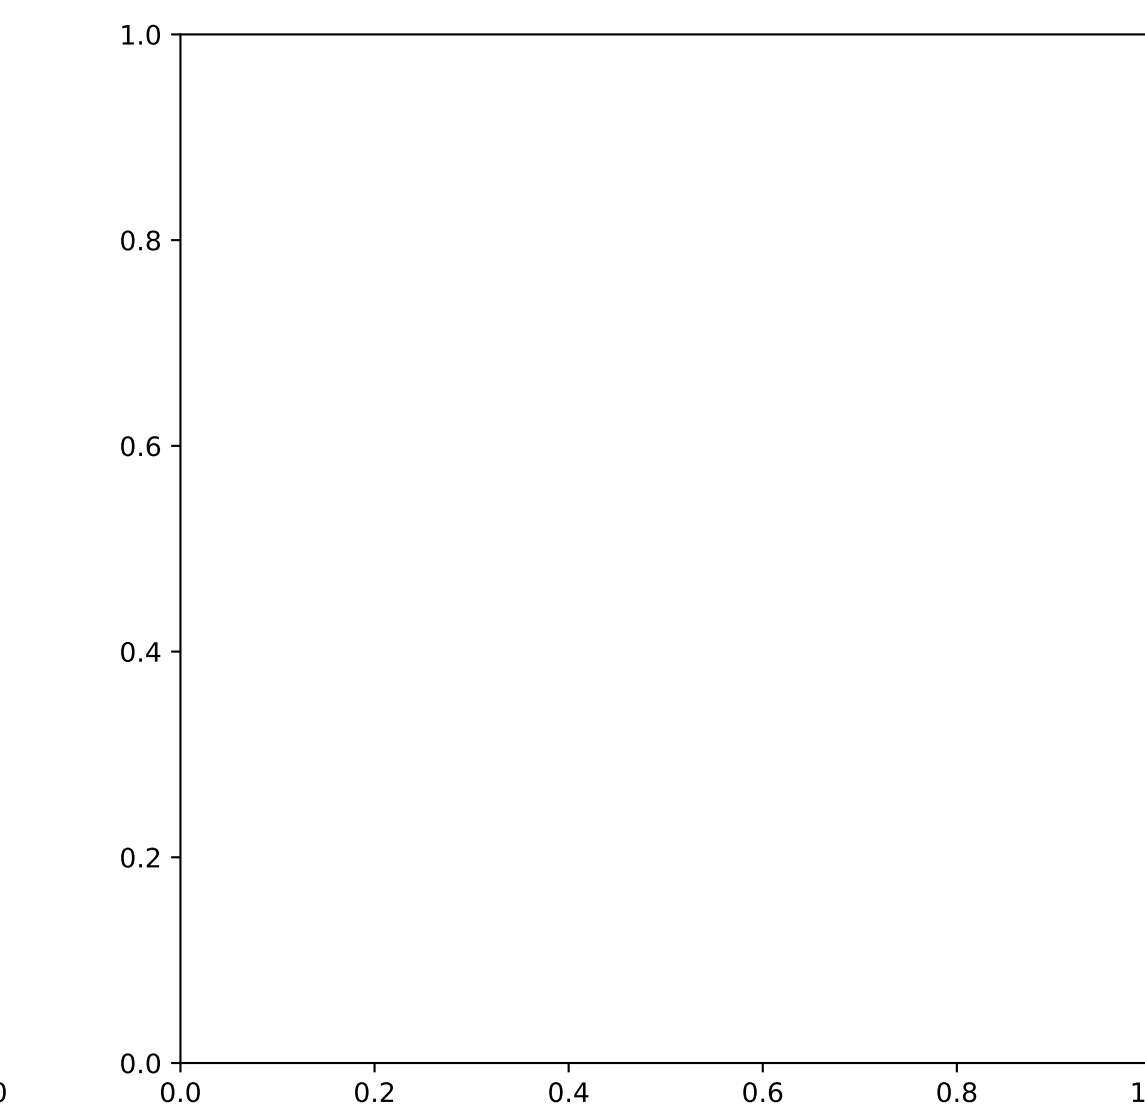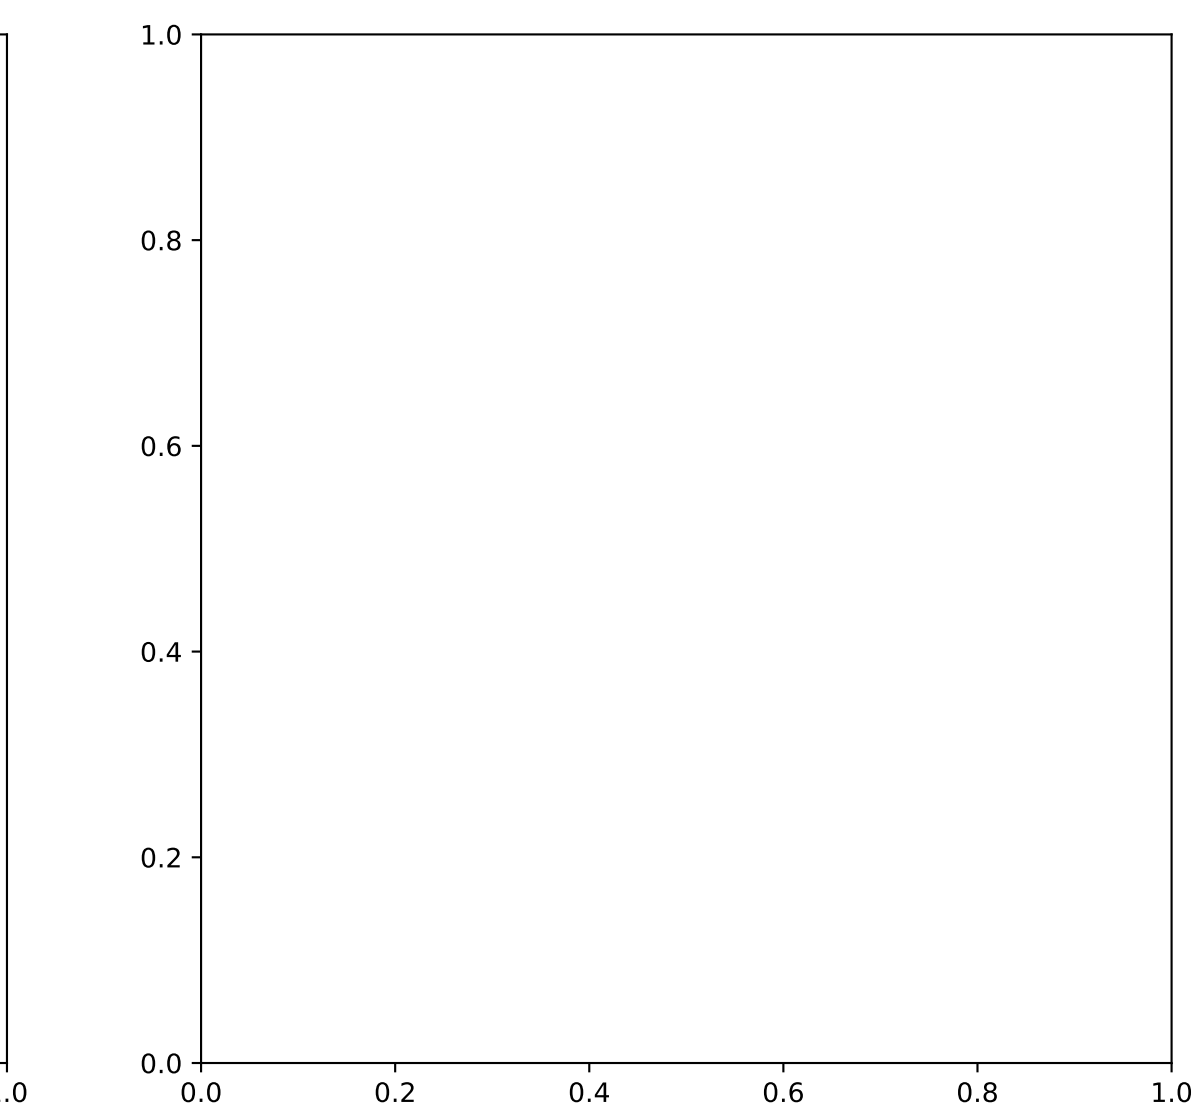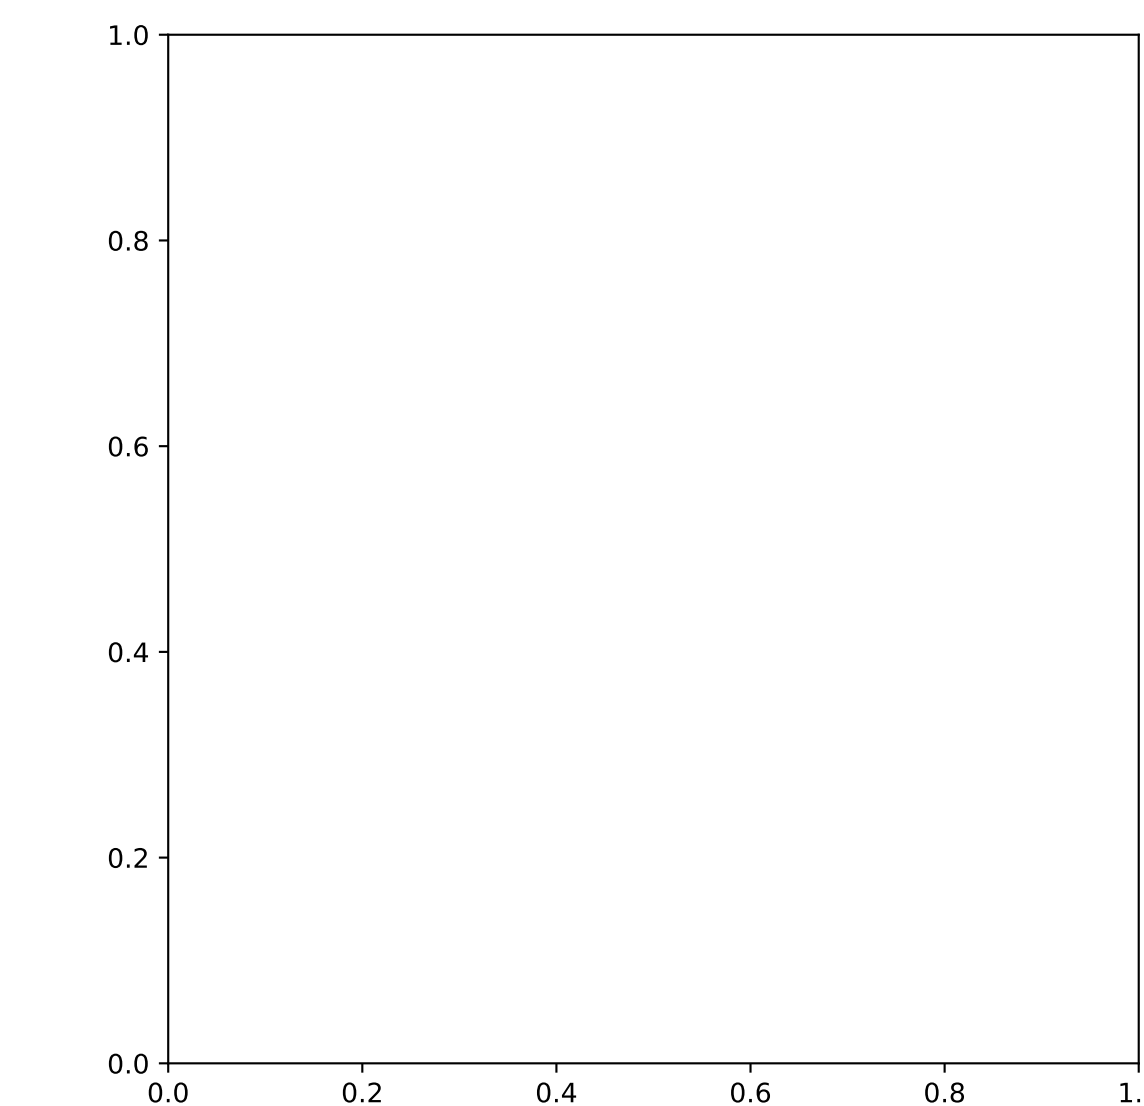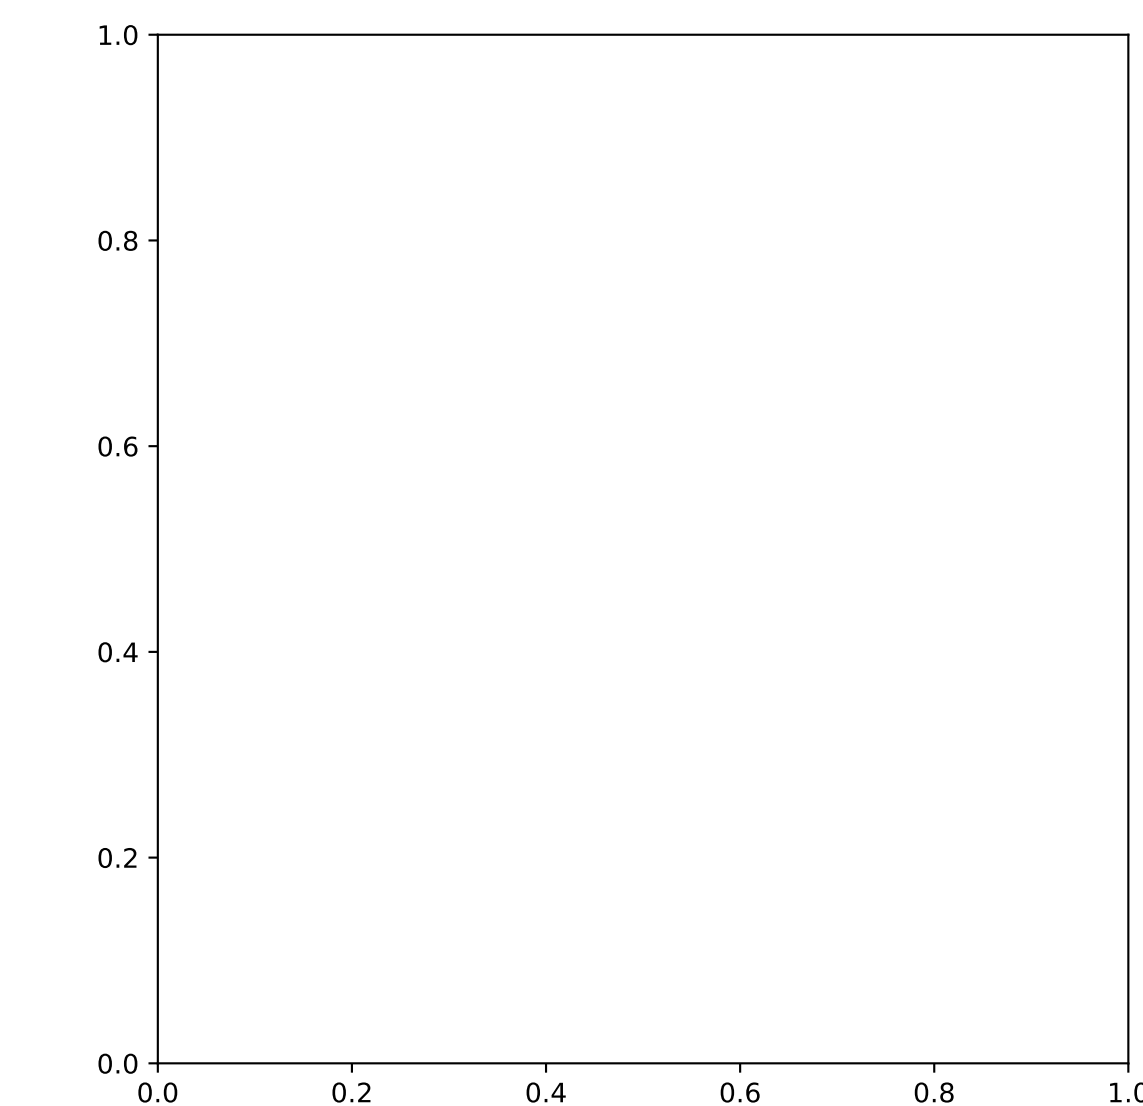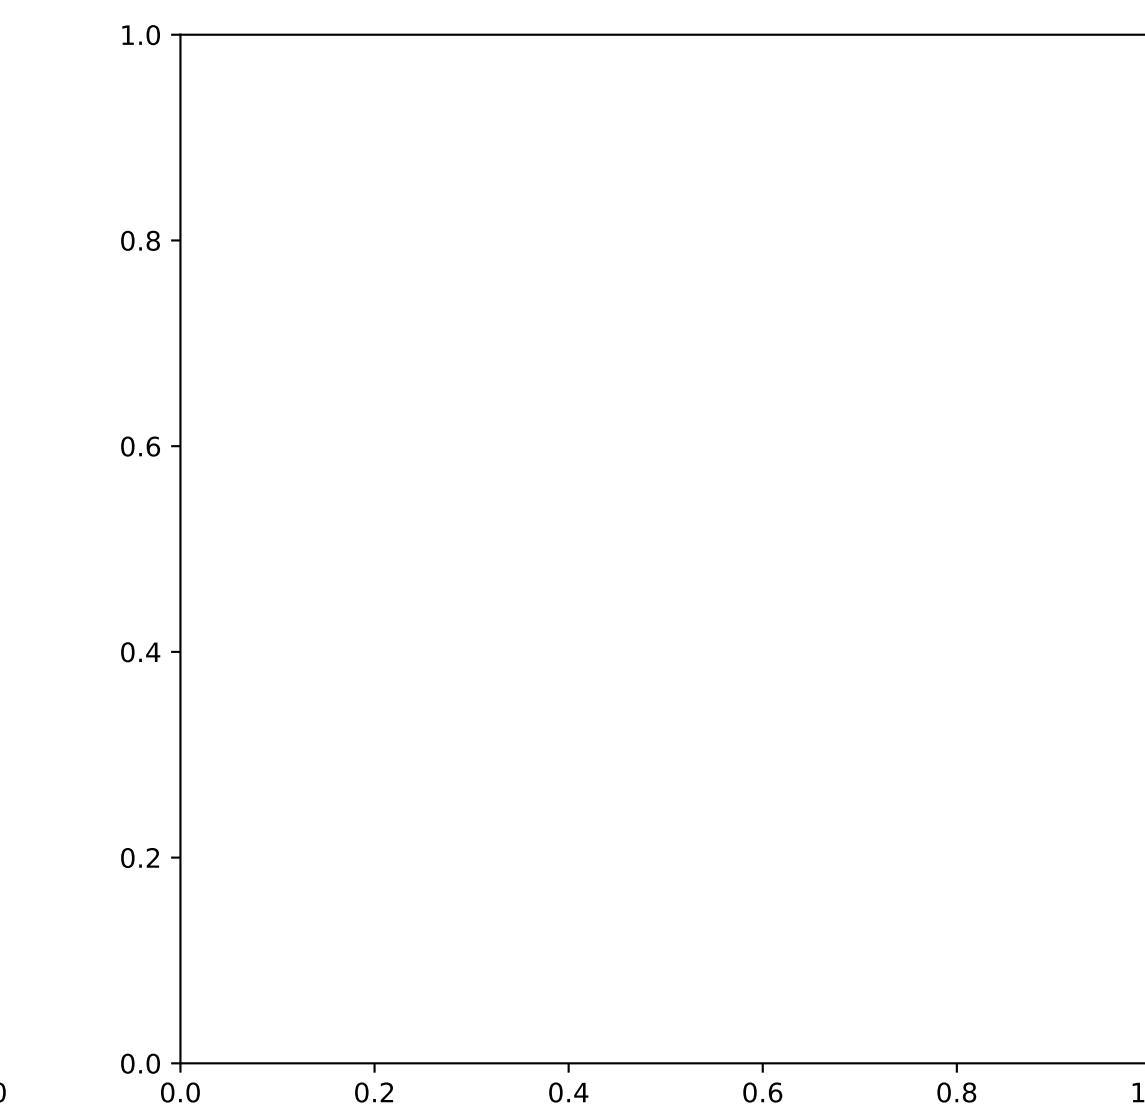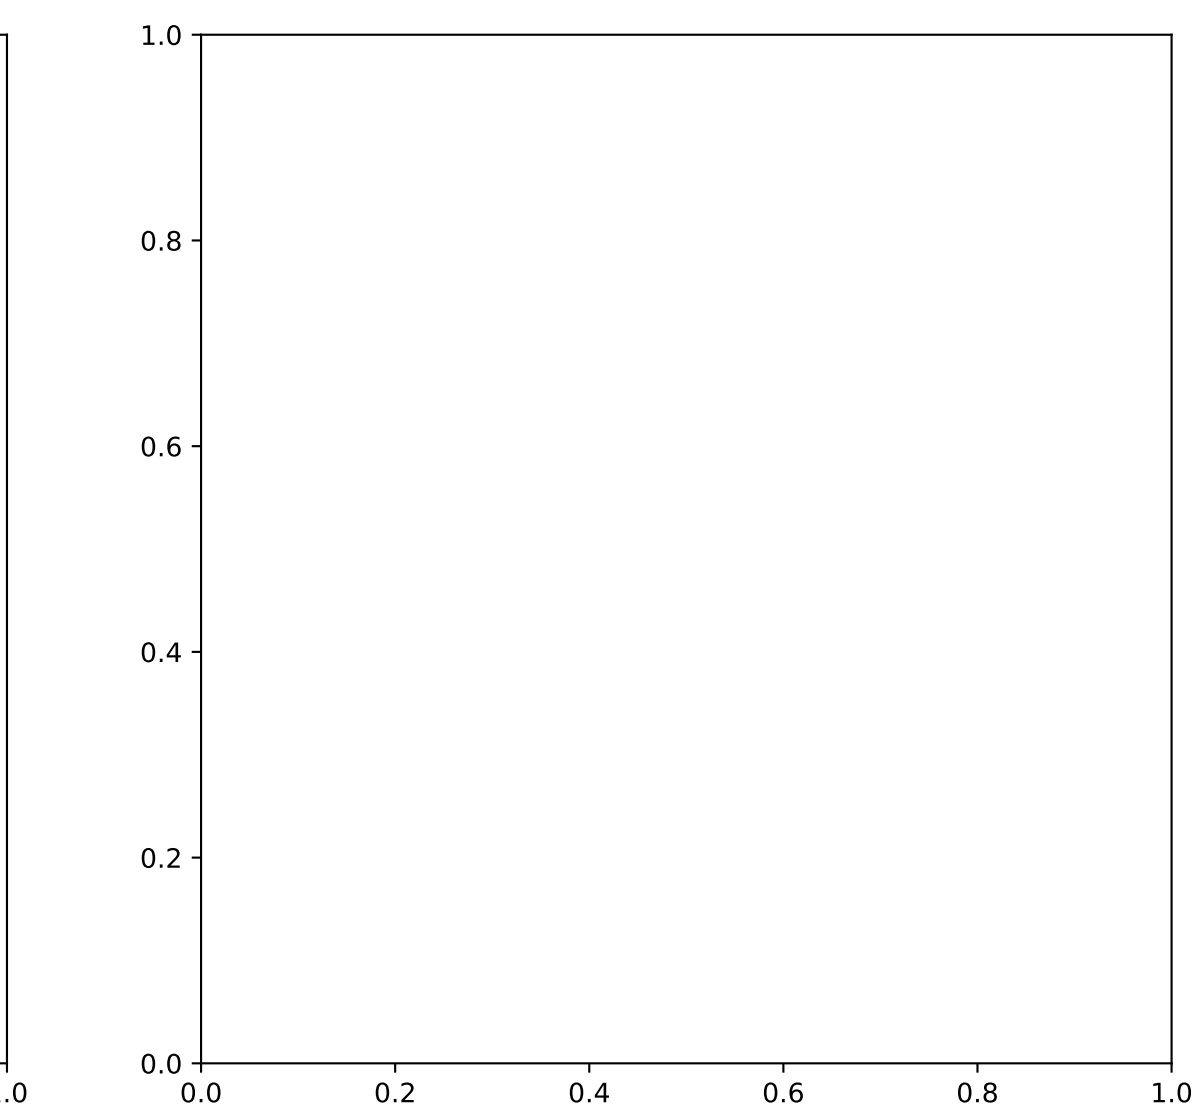

Supplement: supplementary_material [file attachment]

Acrobot

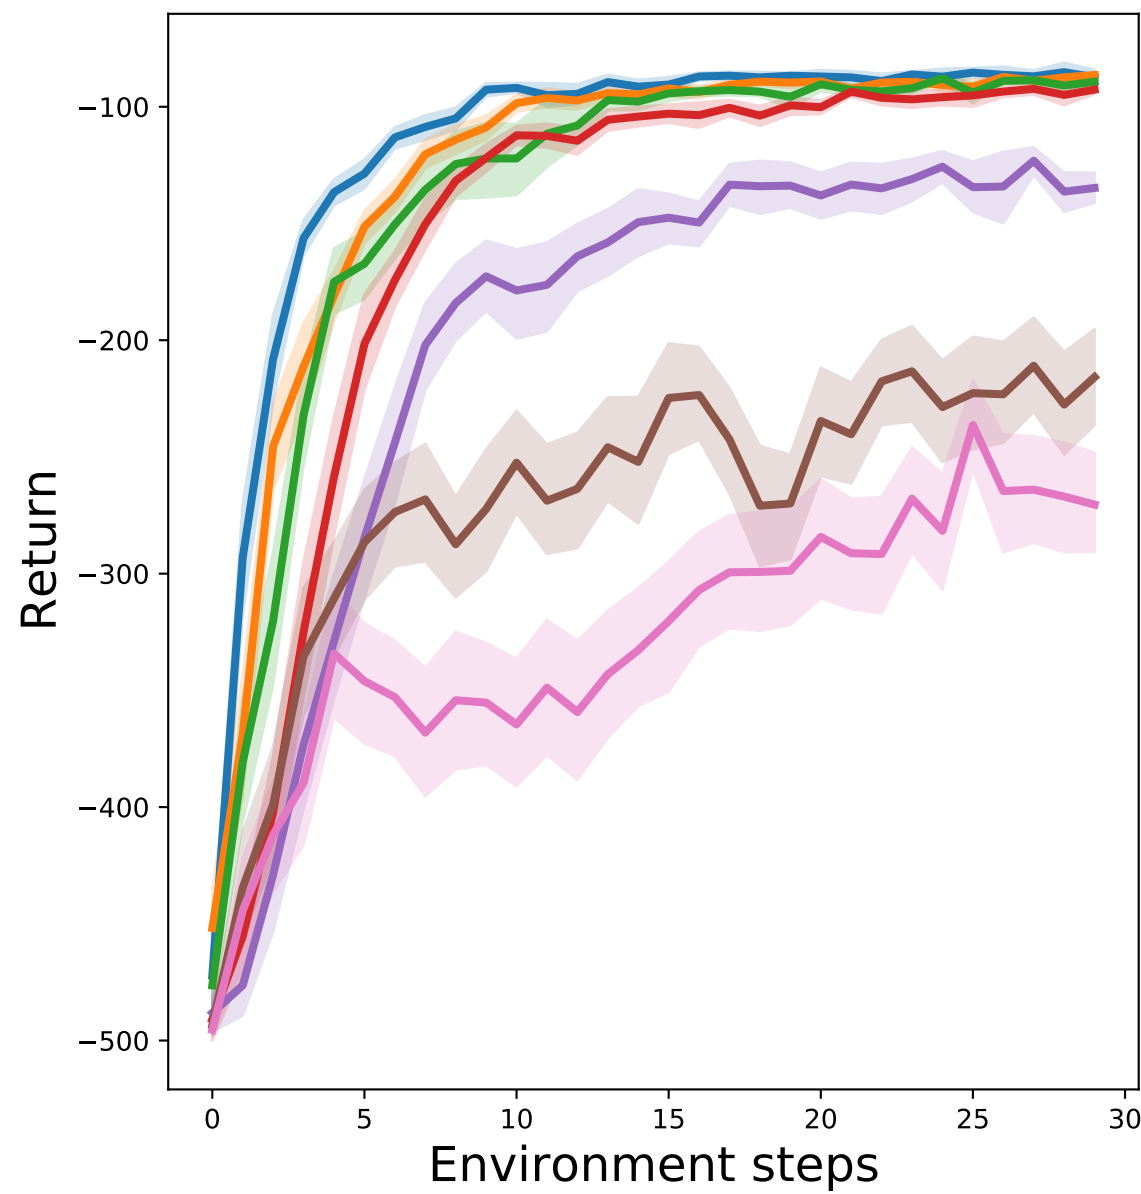

CartPole

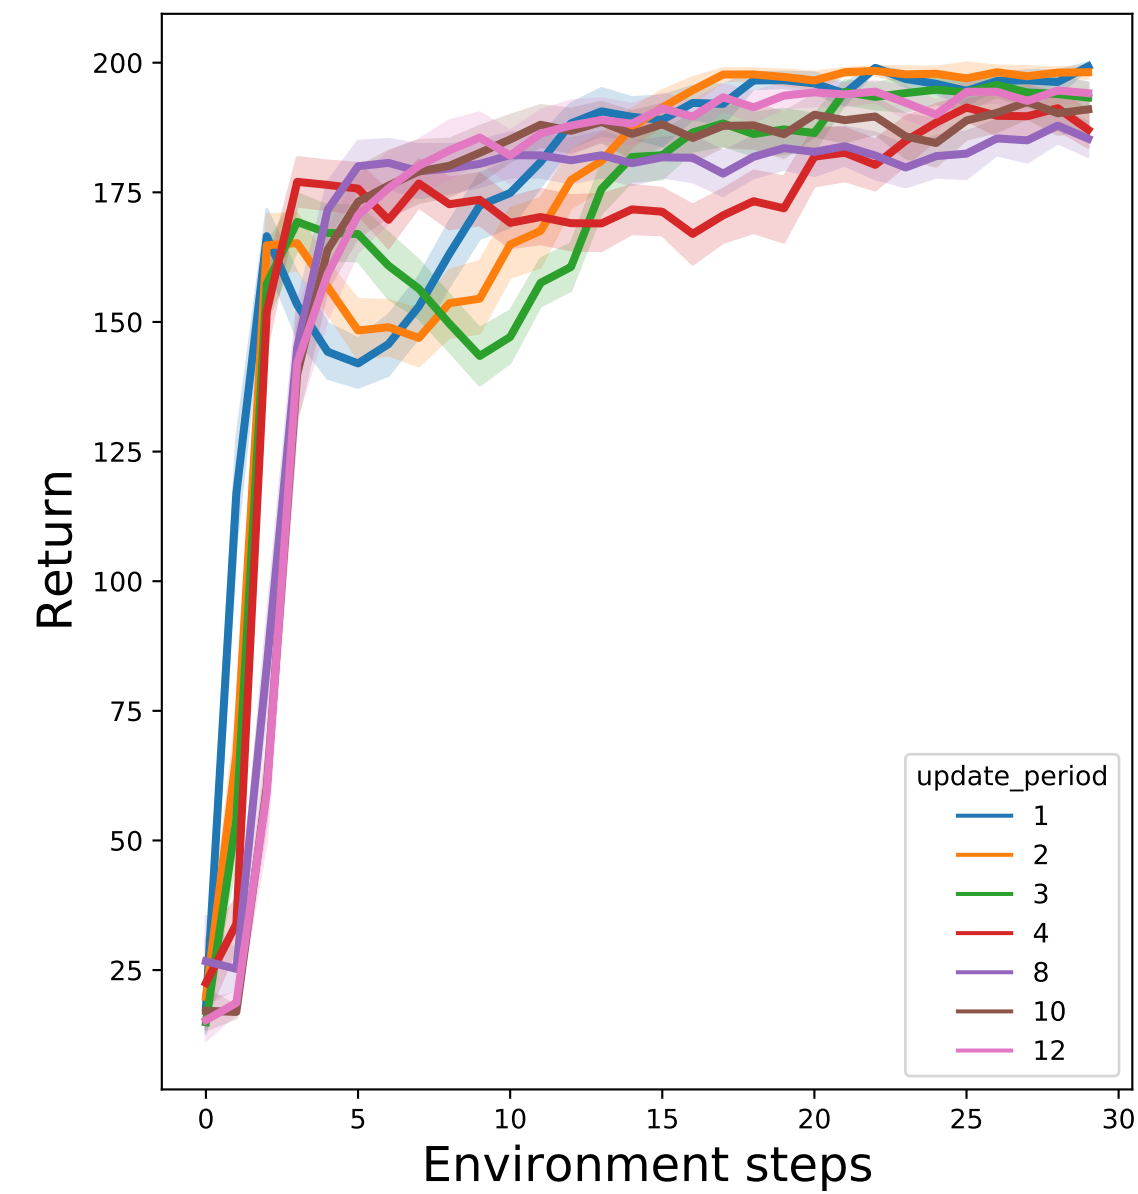

LunarLander

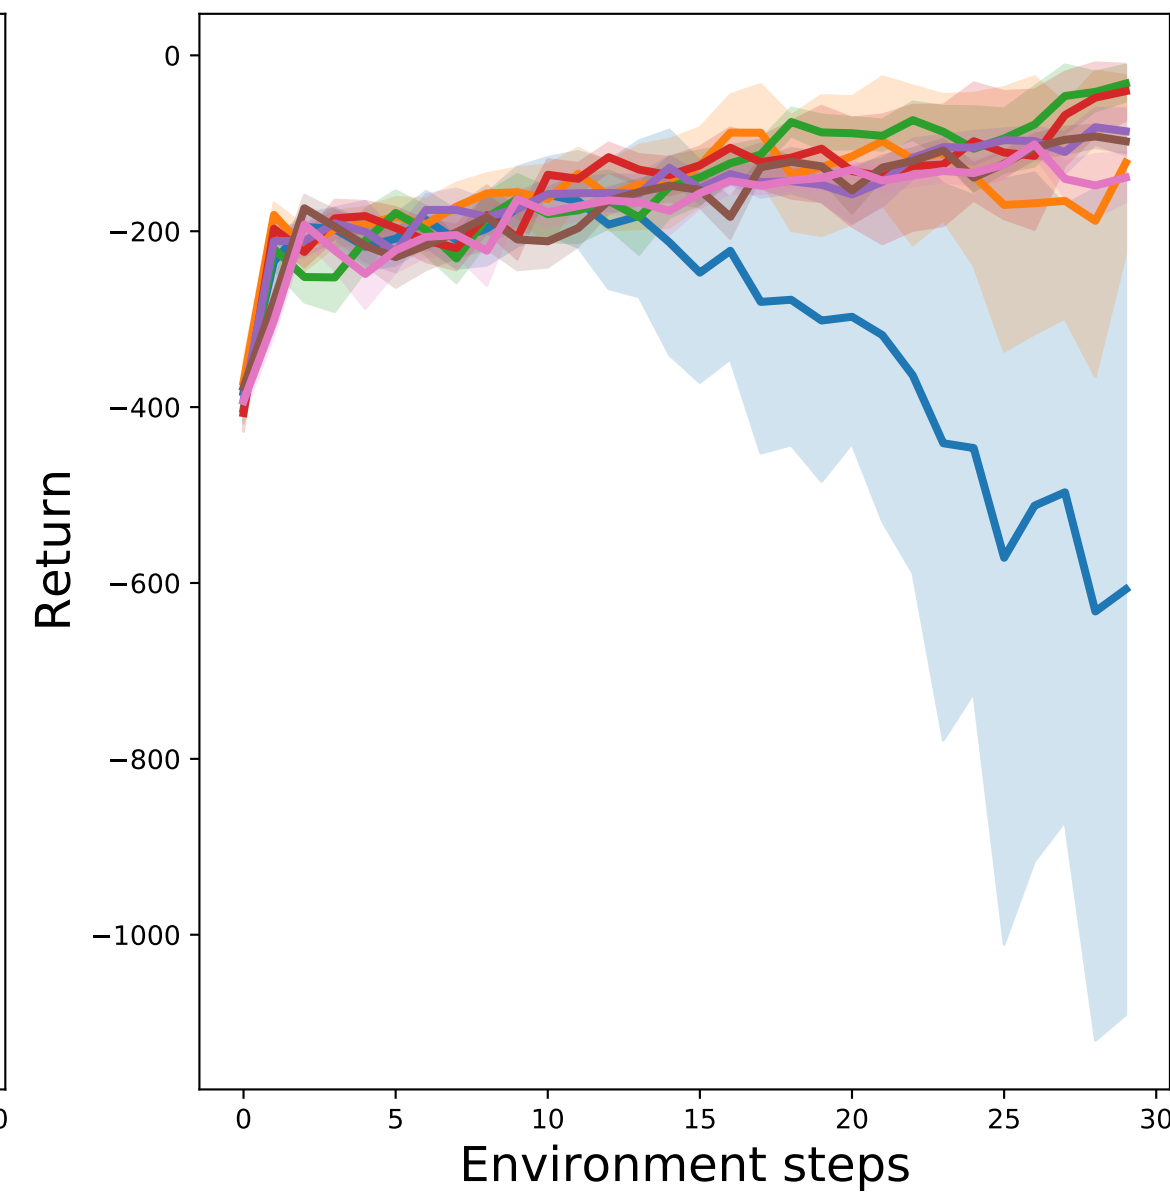

MountainCar

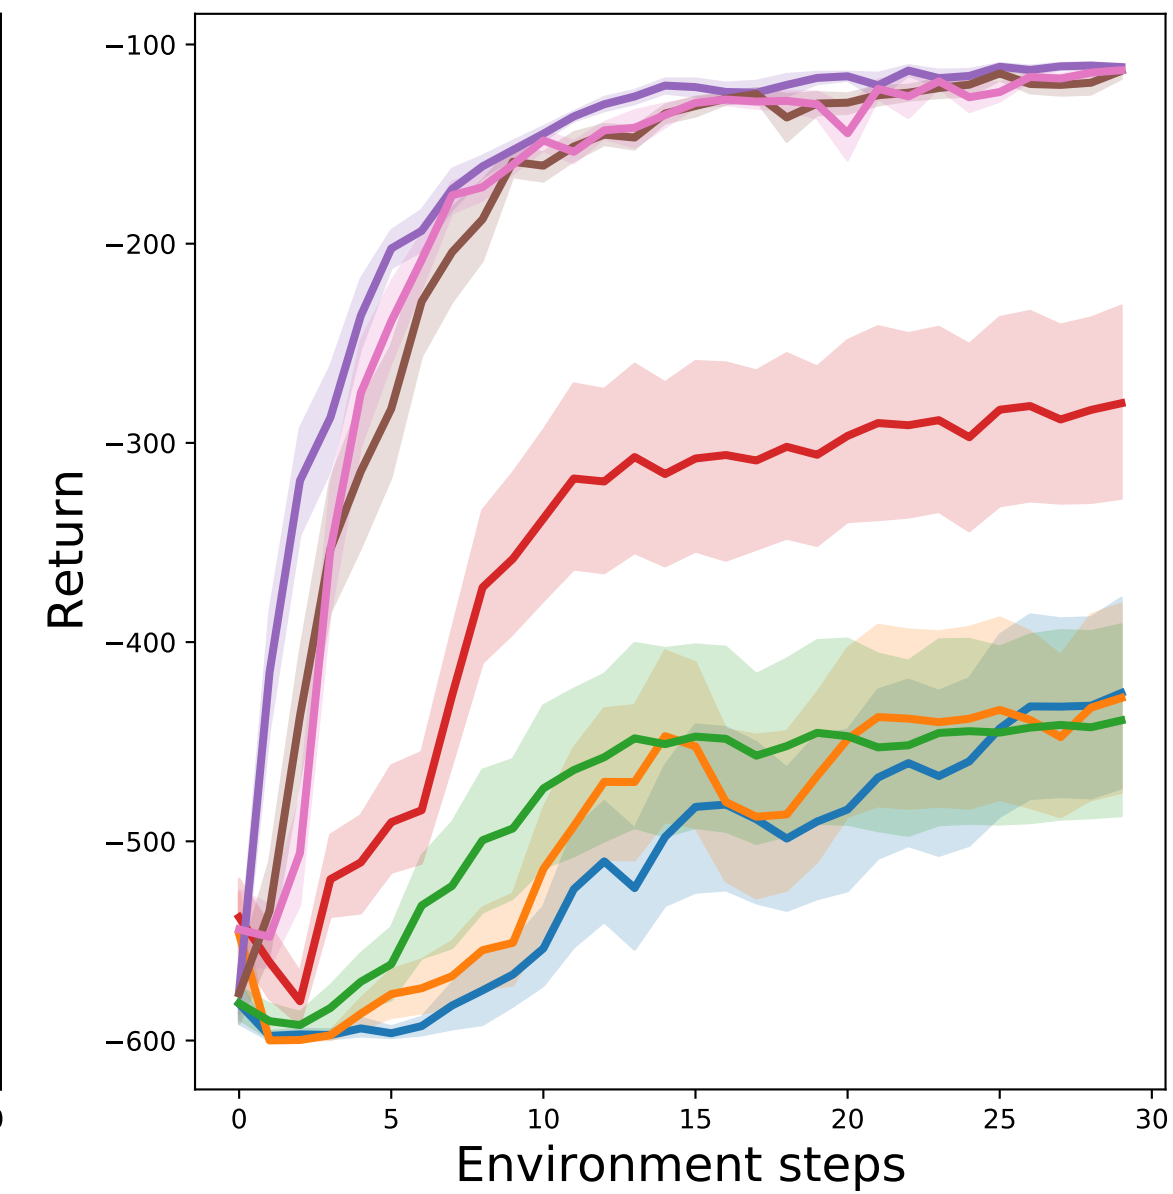

Acrobot

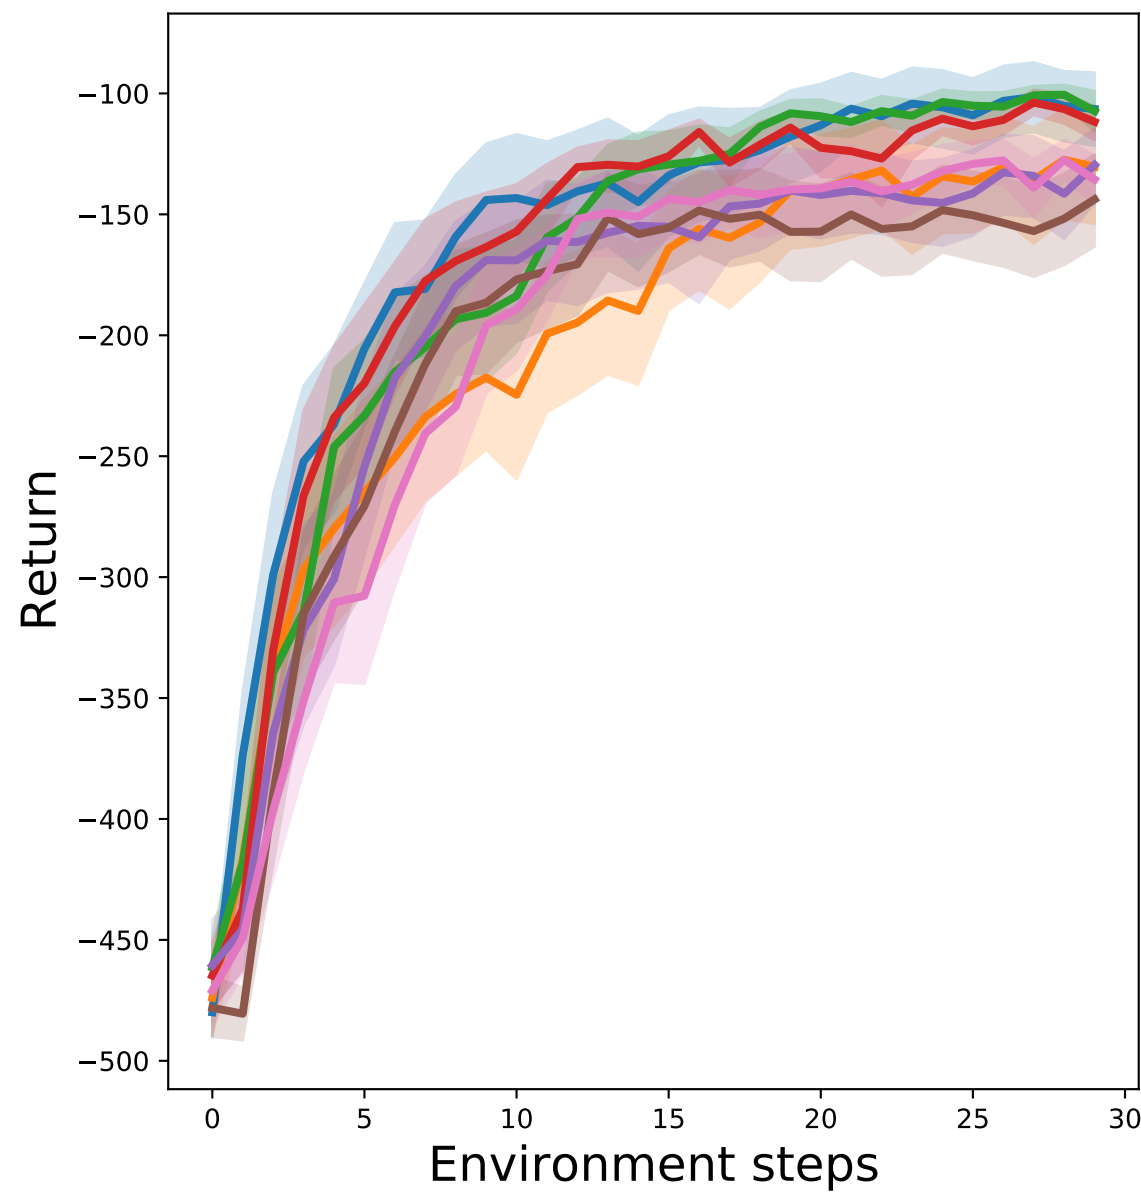

CartPole

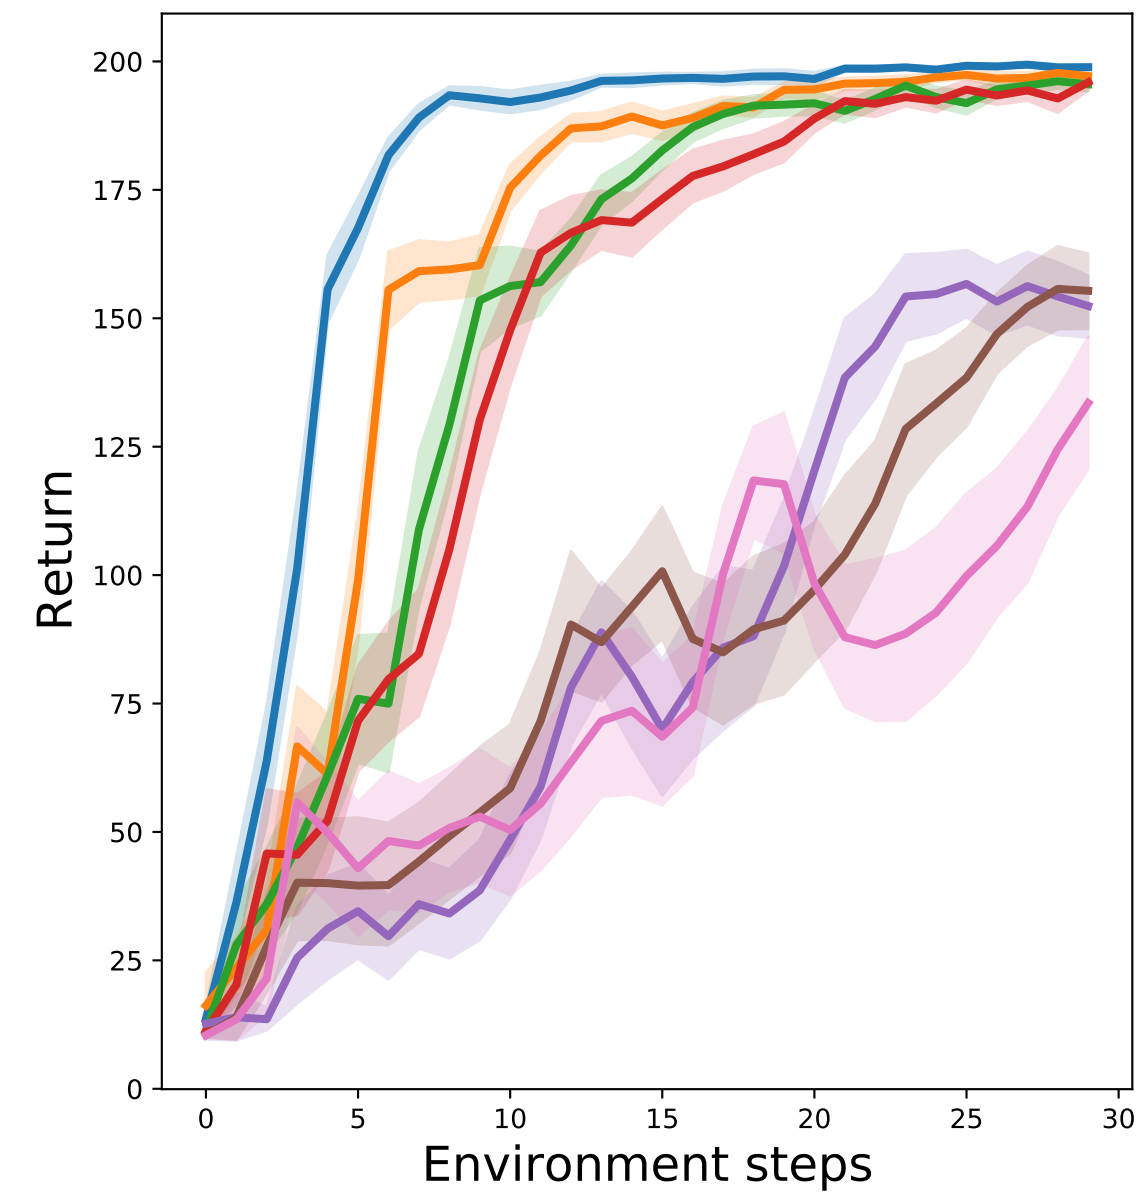

LunarLander

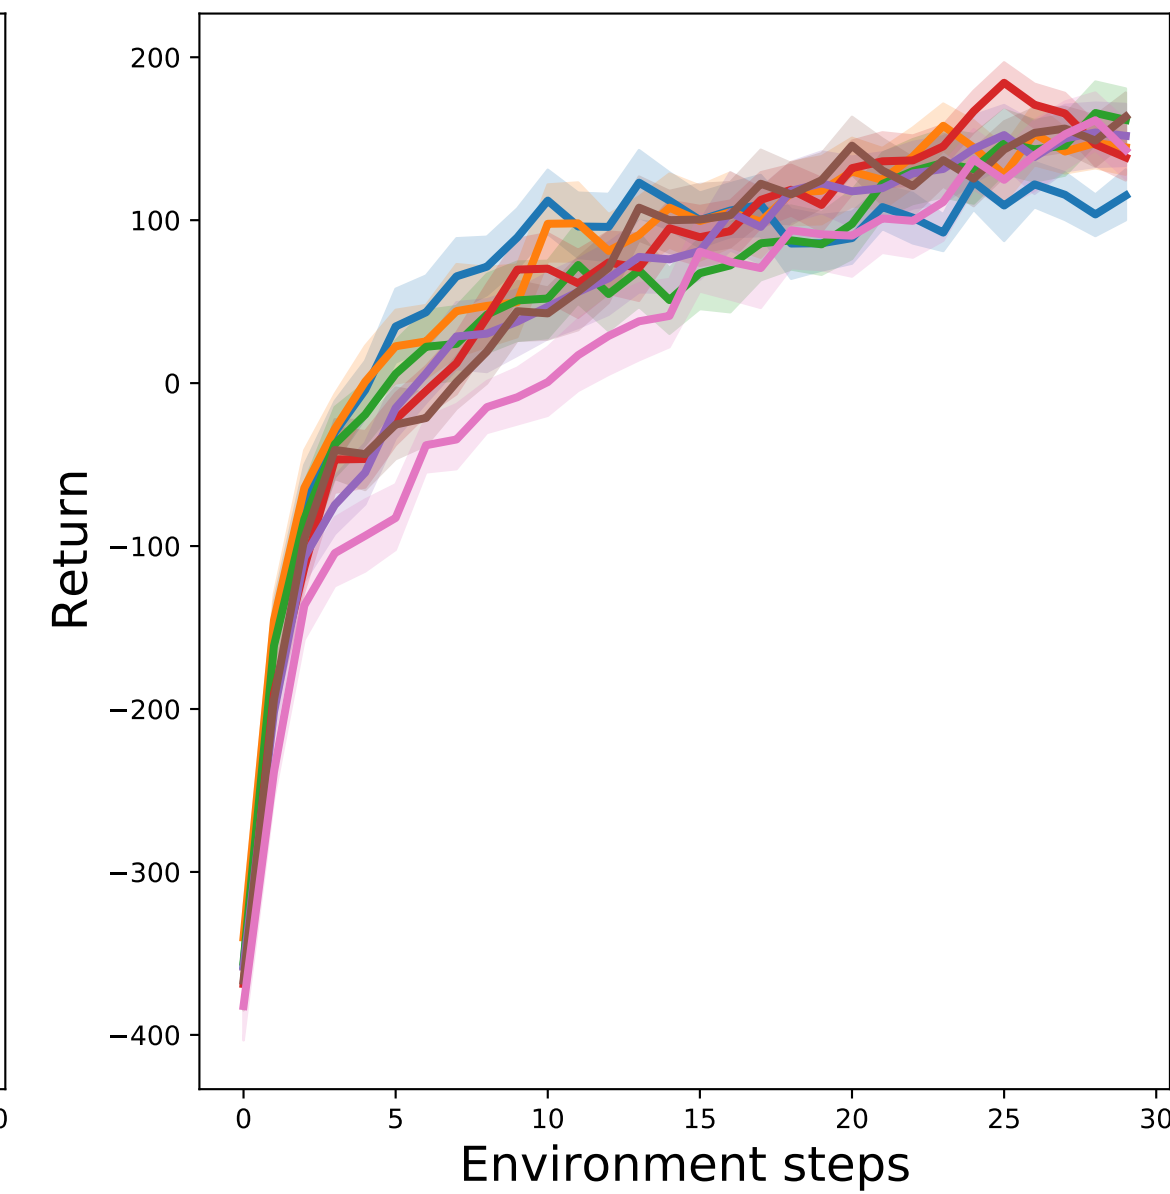

MountainCar

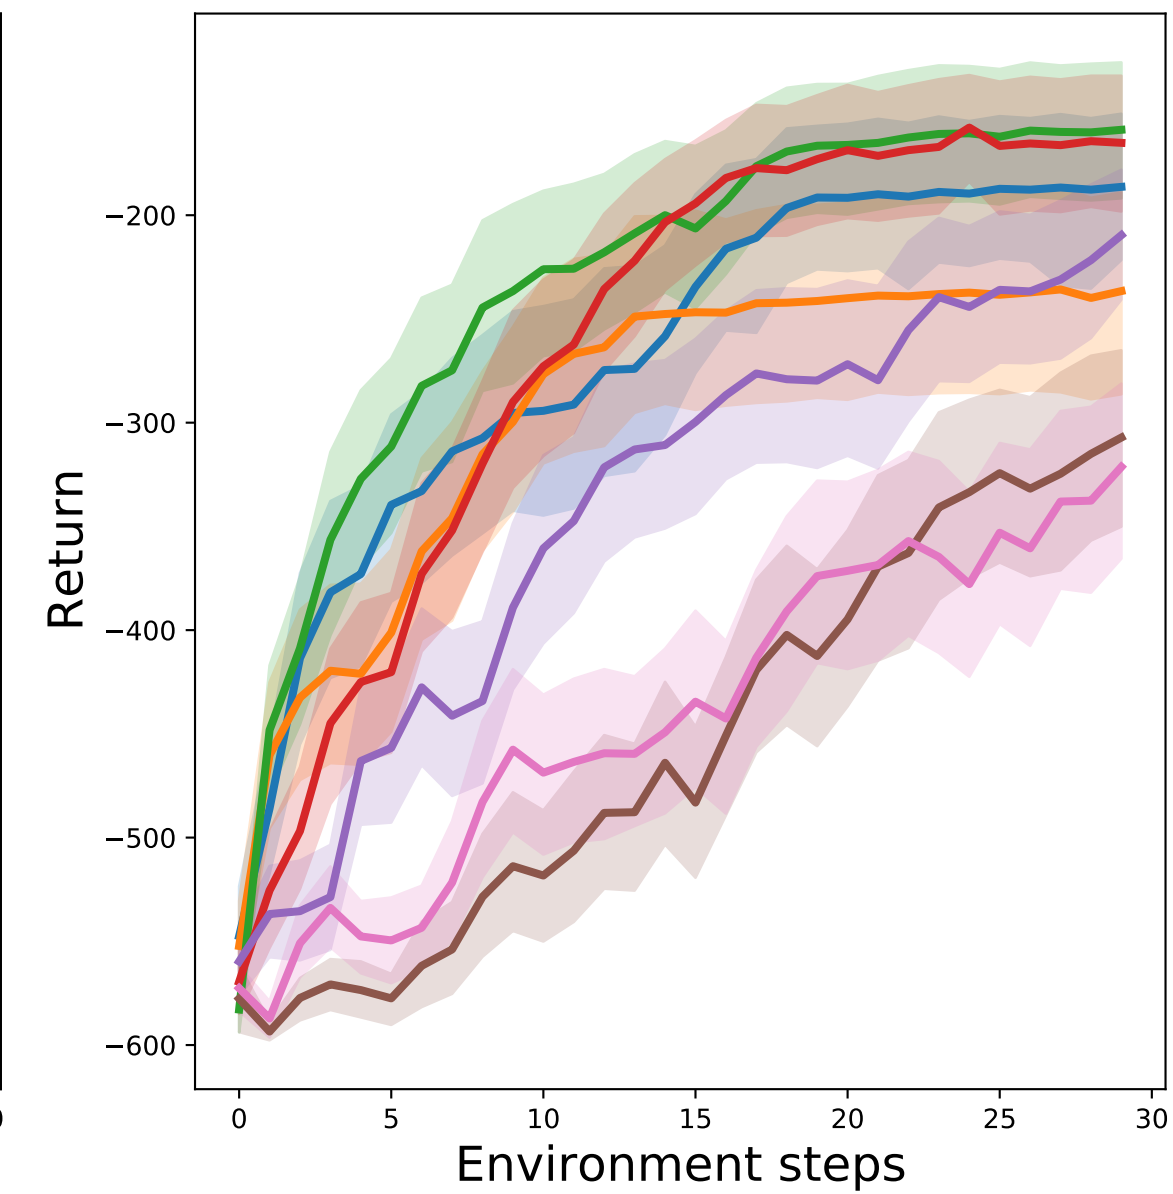

Supplement: supplementary_material [file attachment]

Acrobot

CartPole

LunarLander

MountainCar

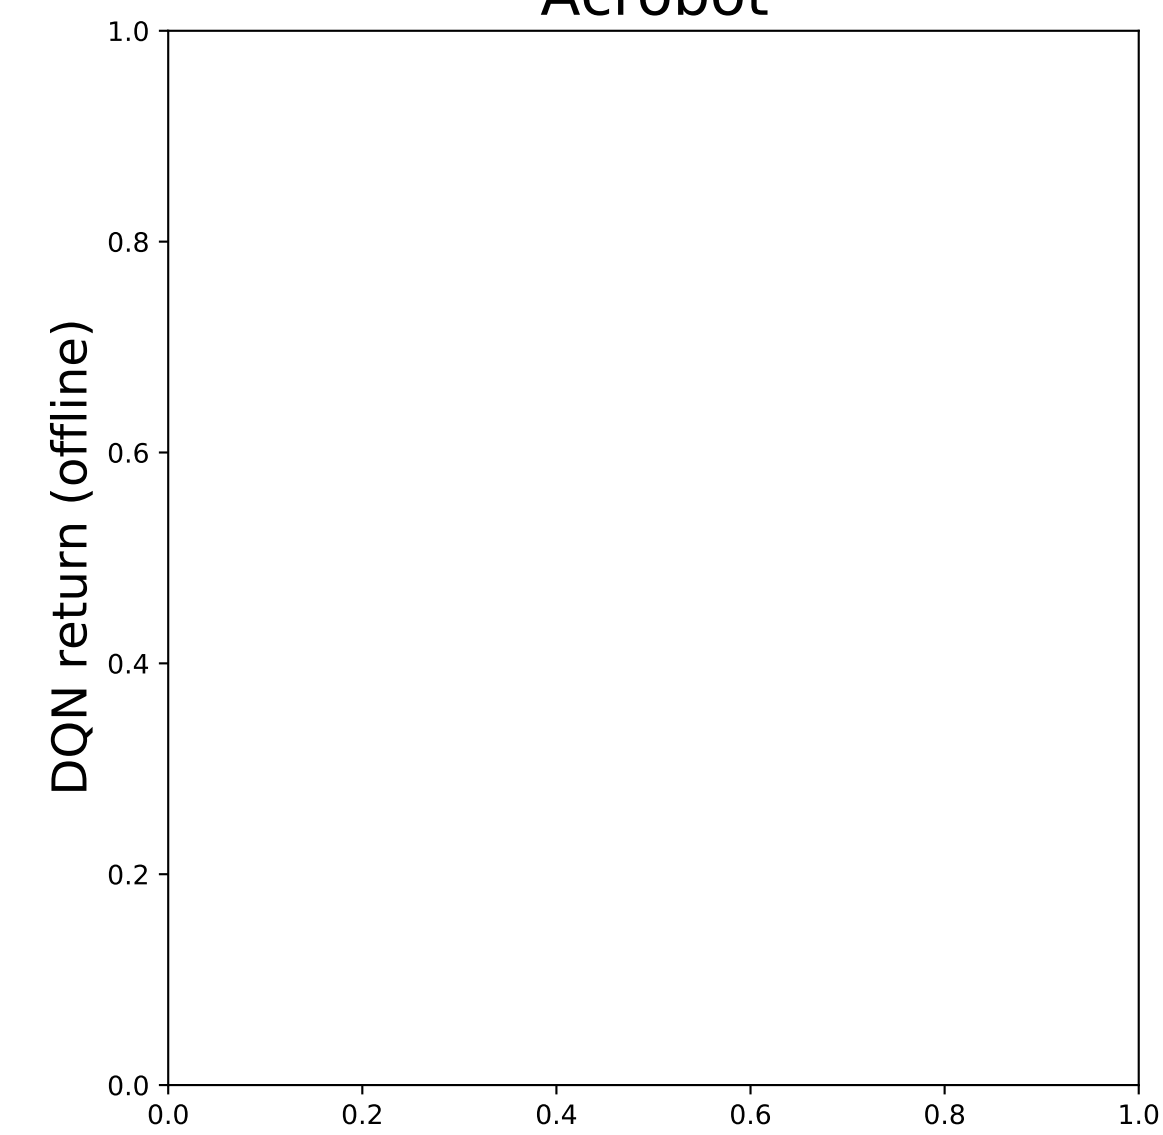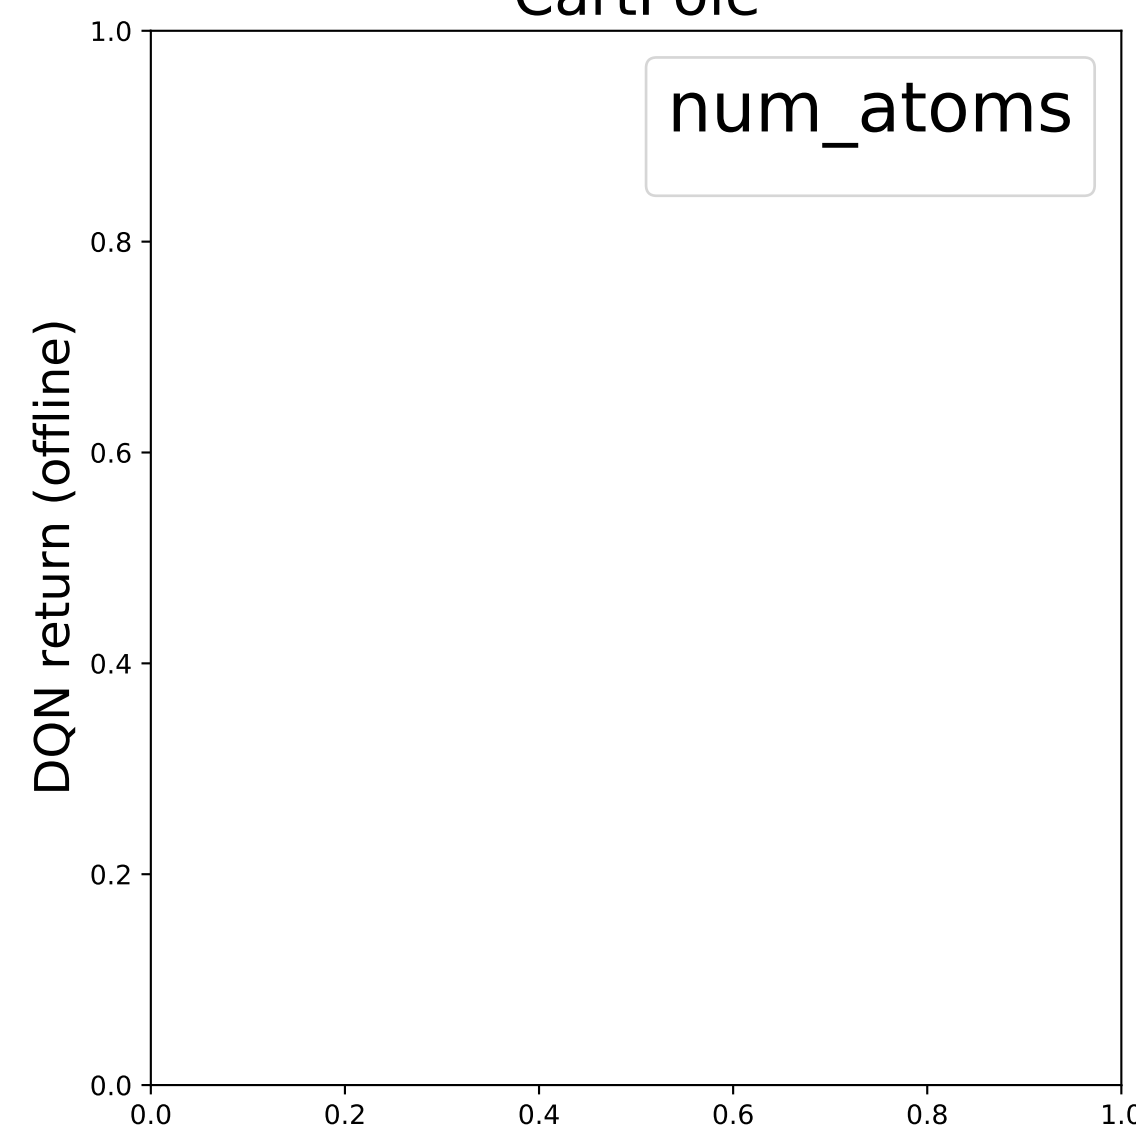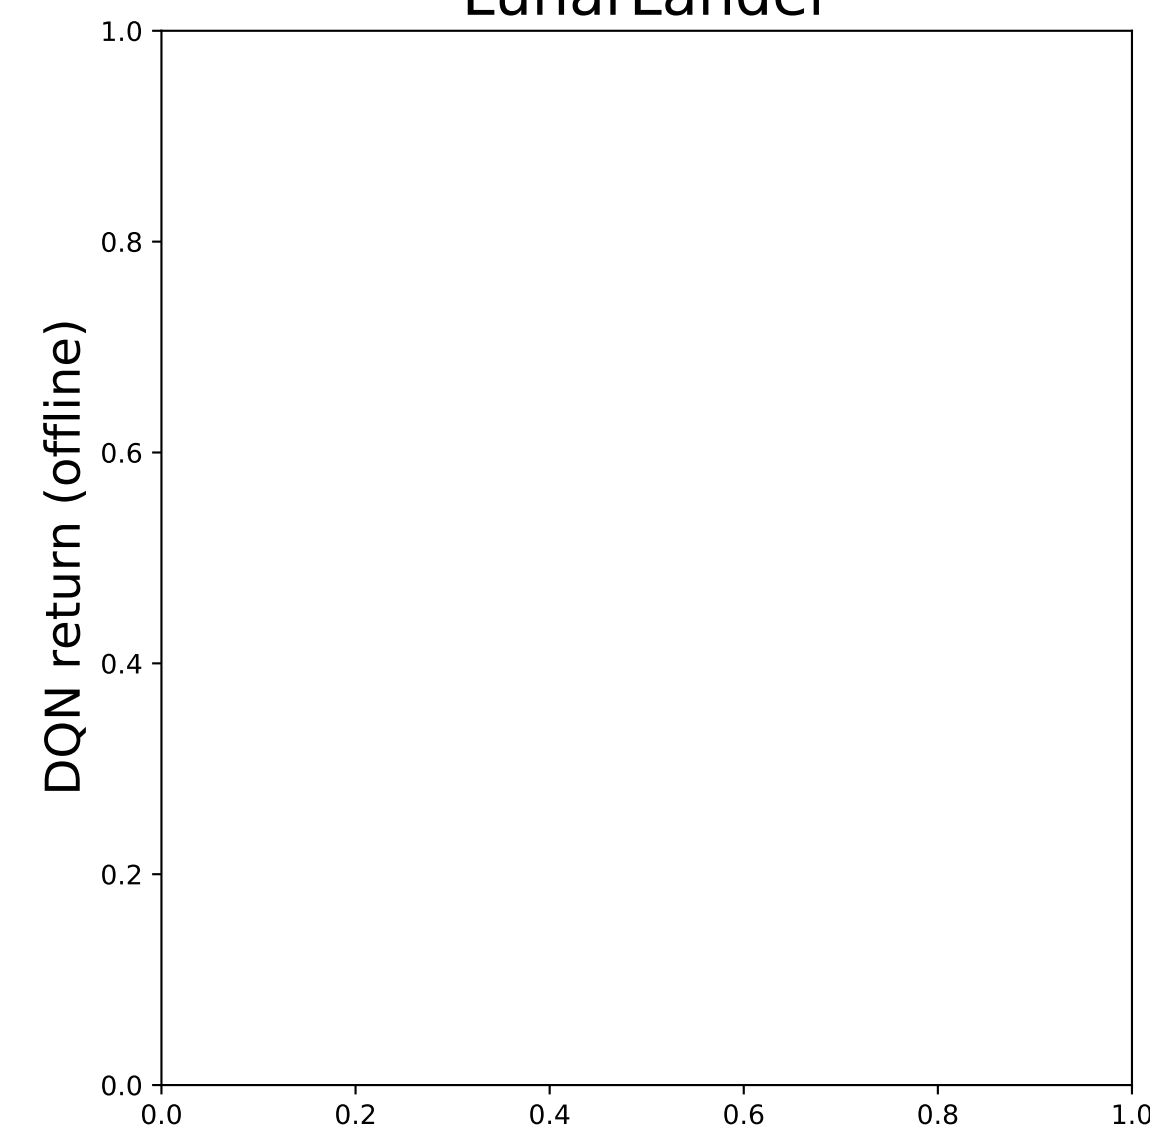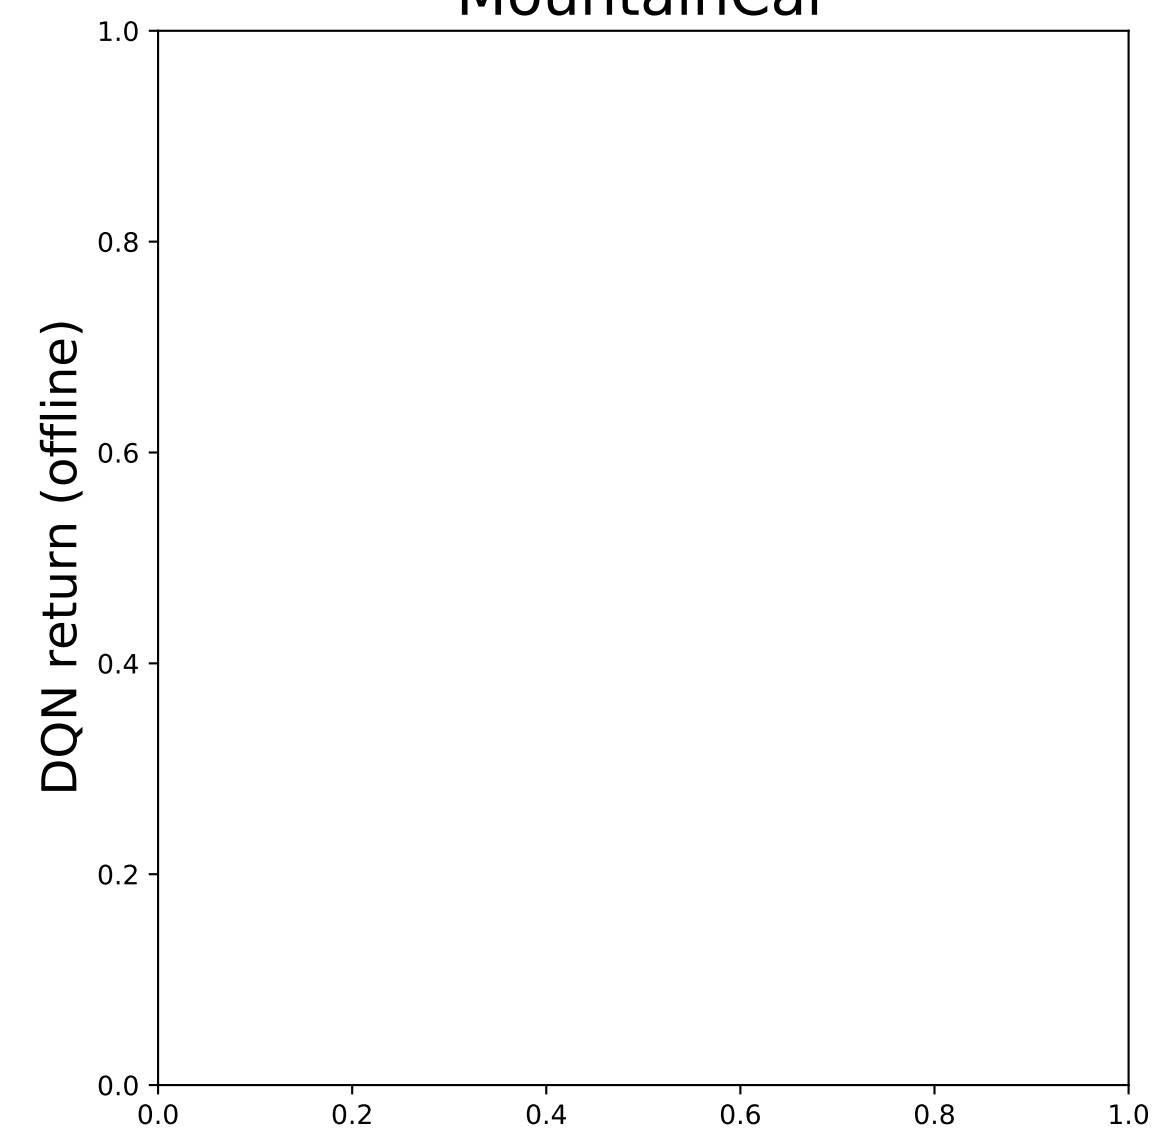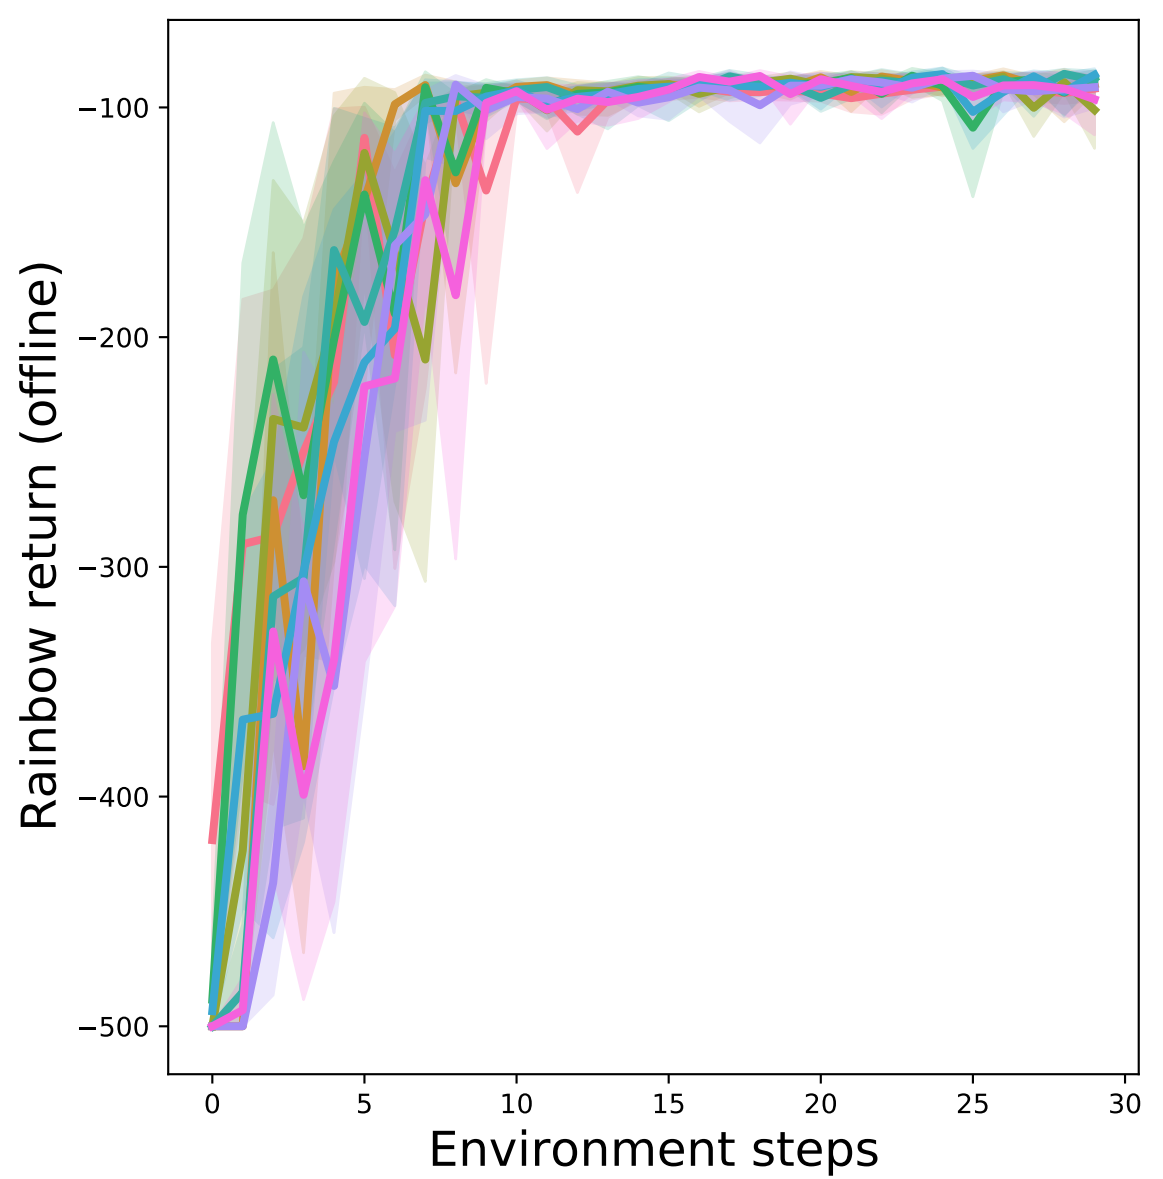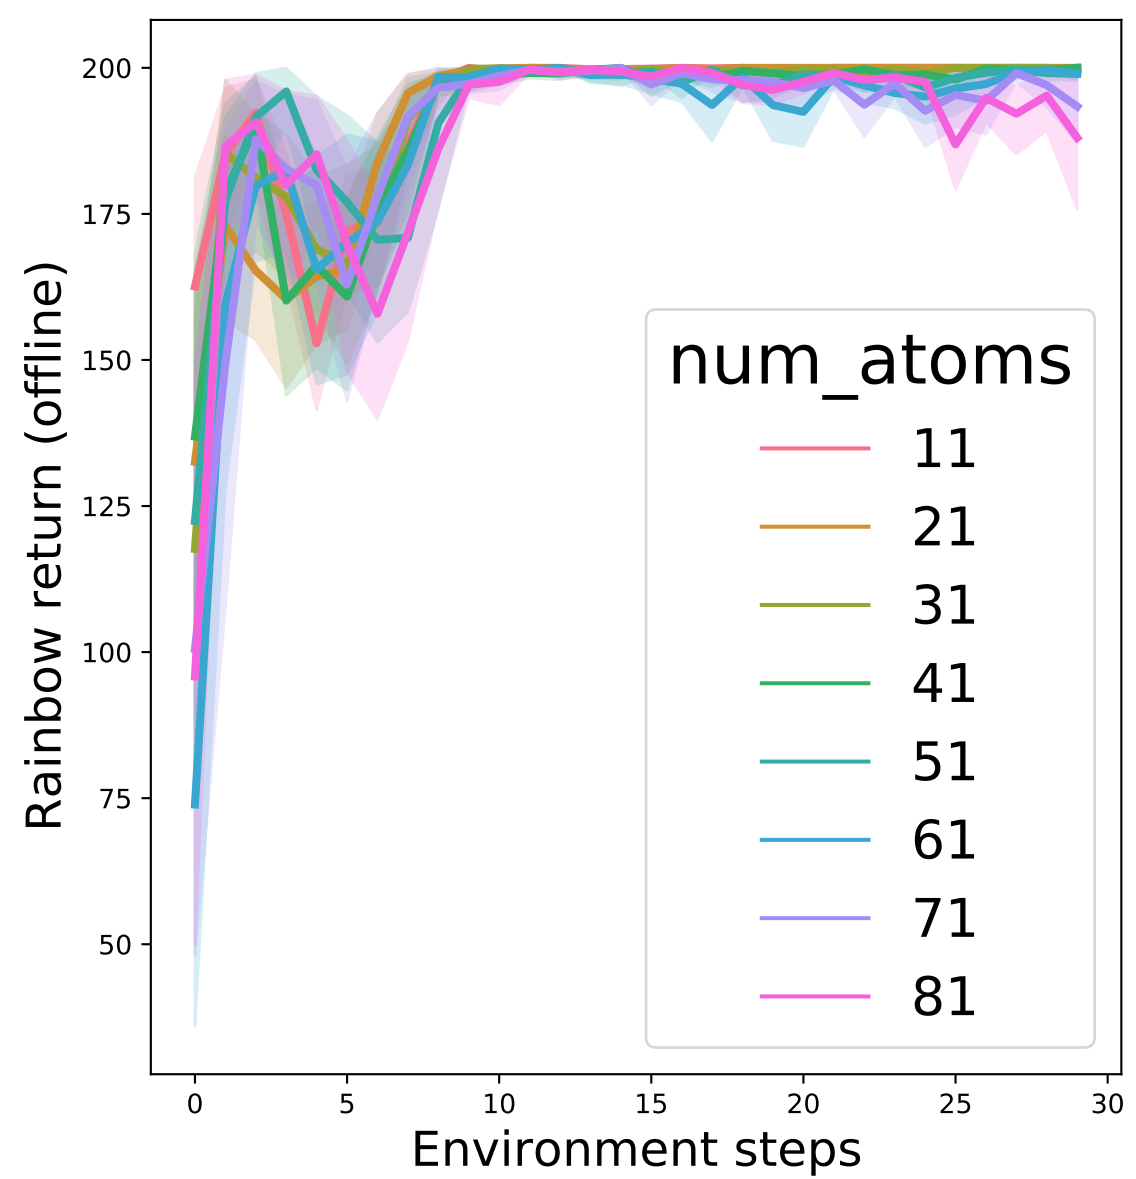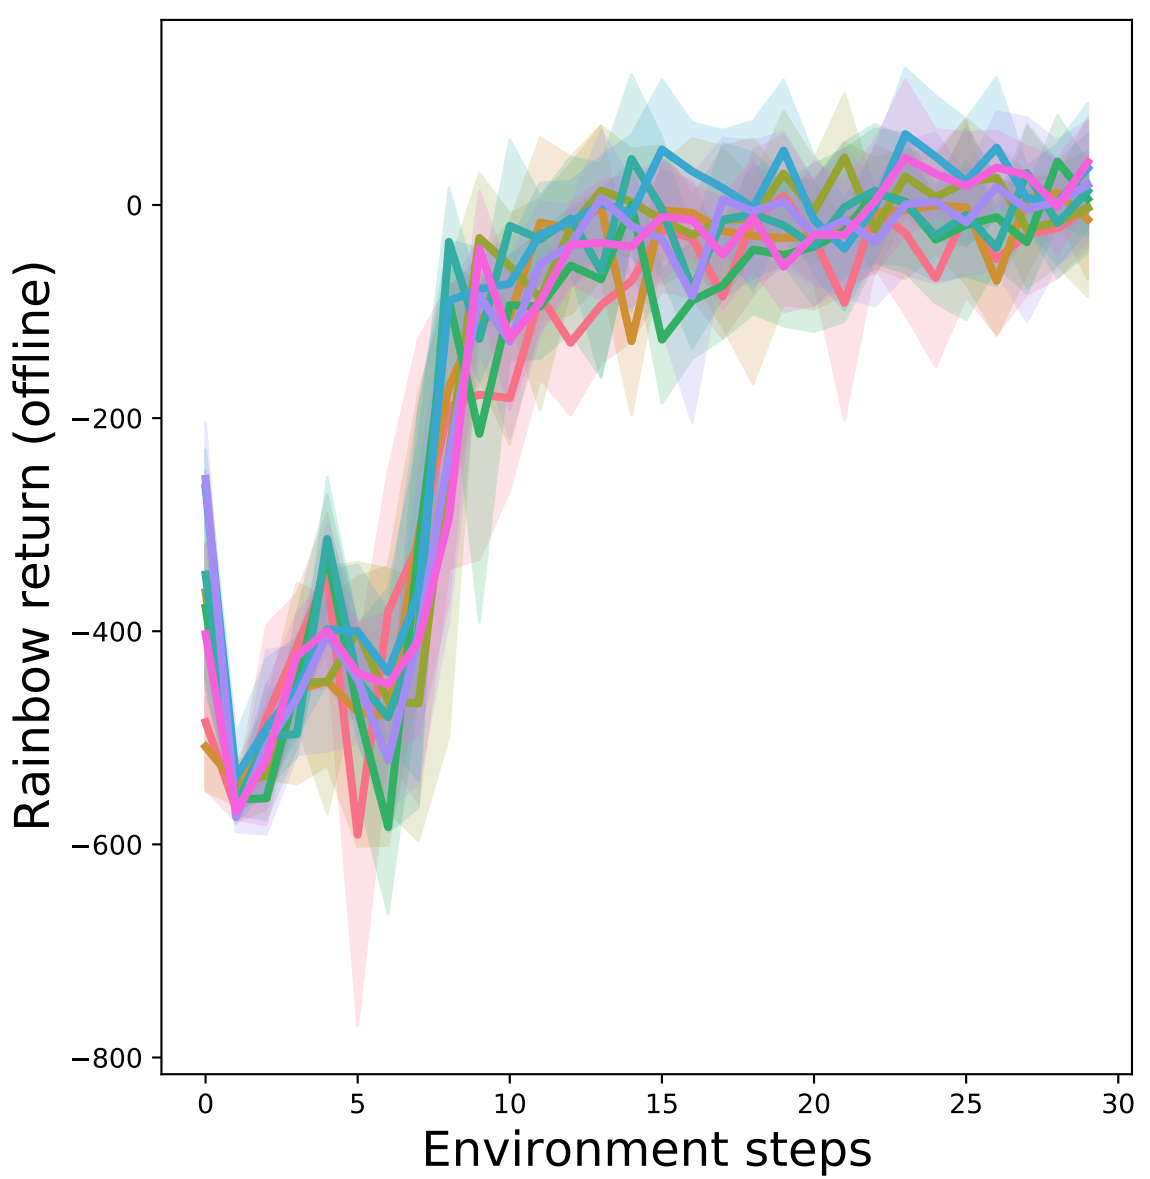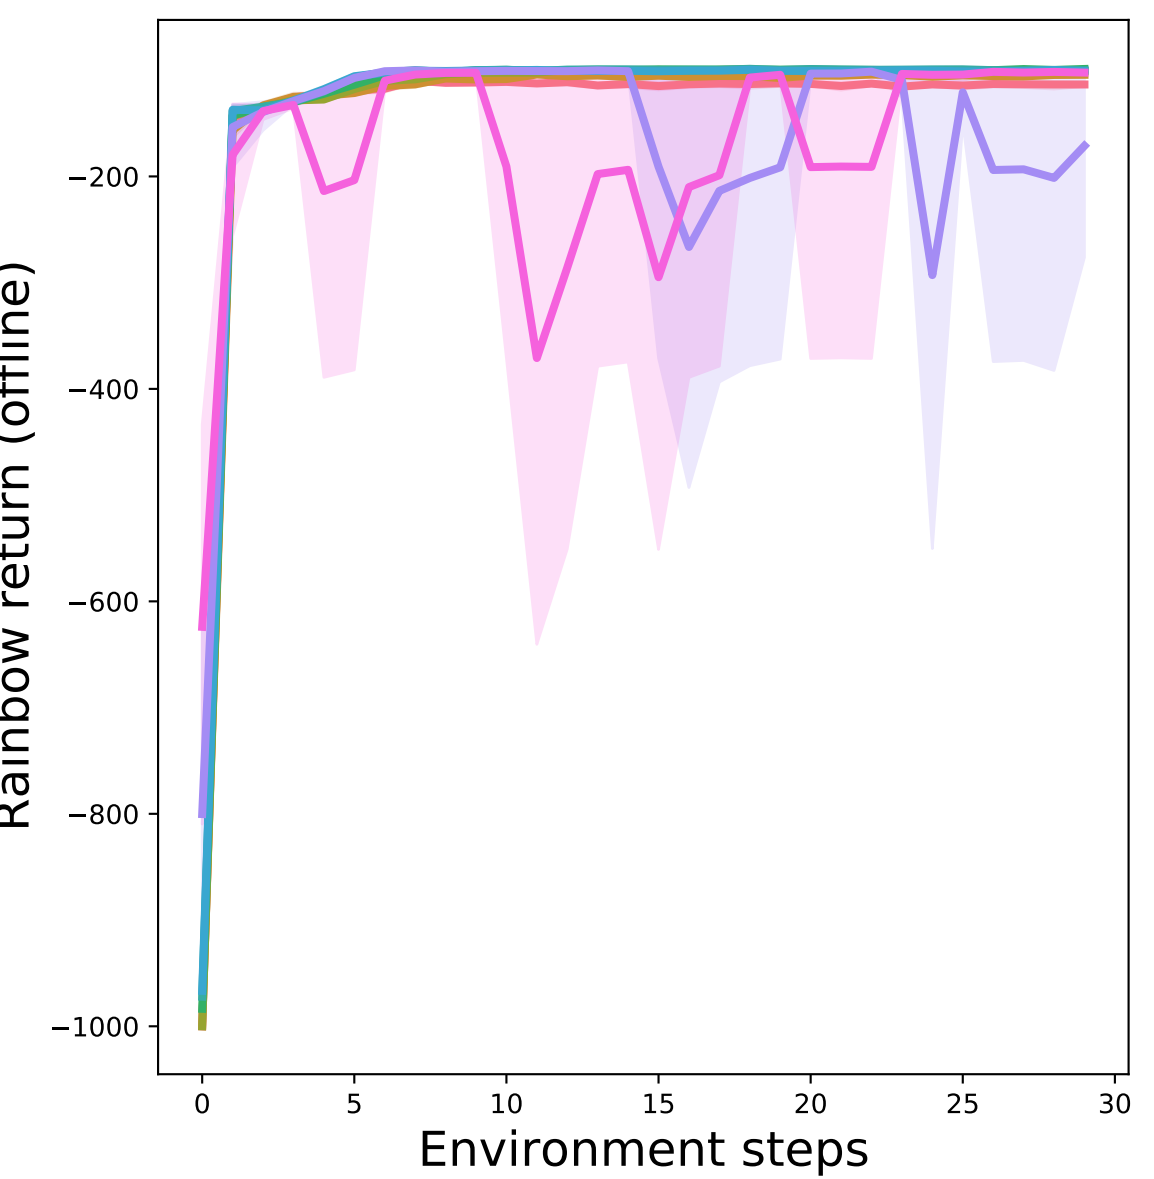

Supplement: supplementary_material [file attachment]

Acrobot

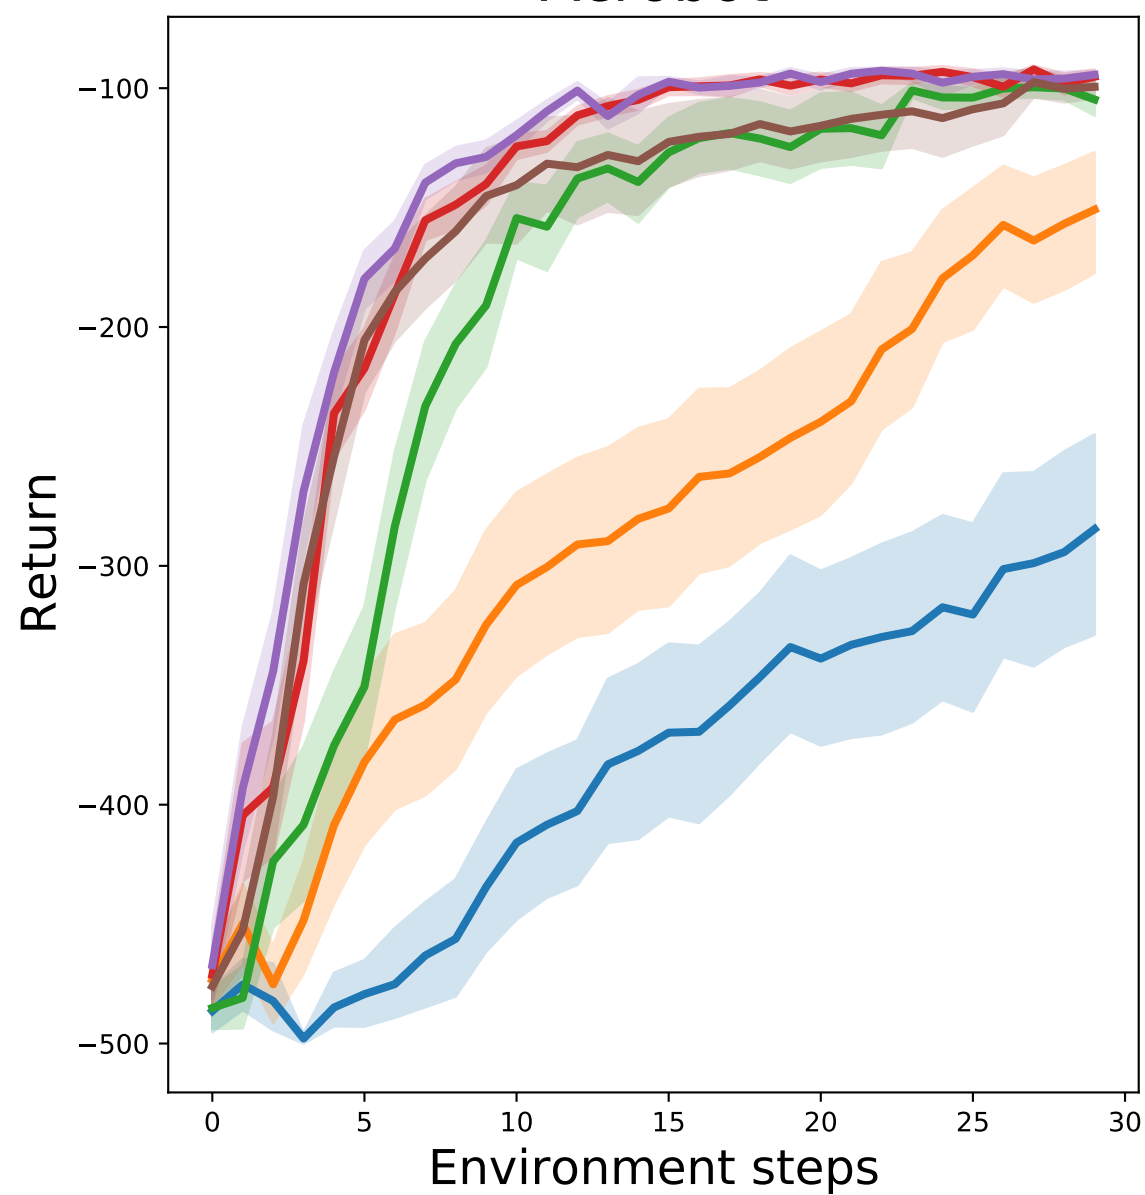

CartPole

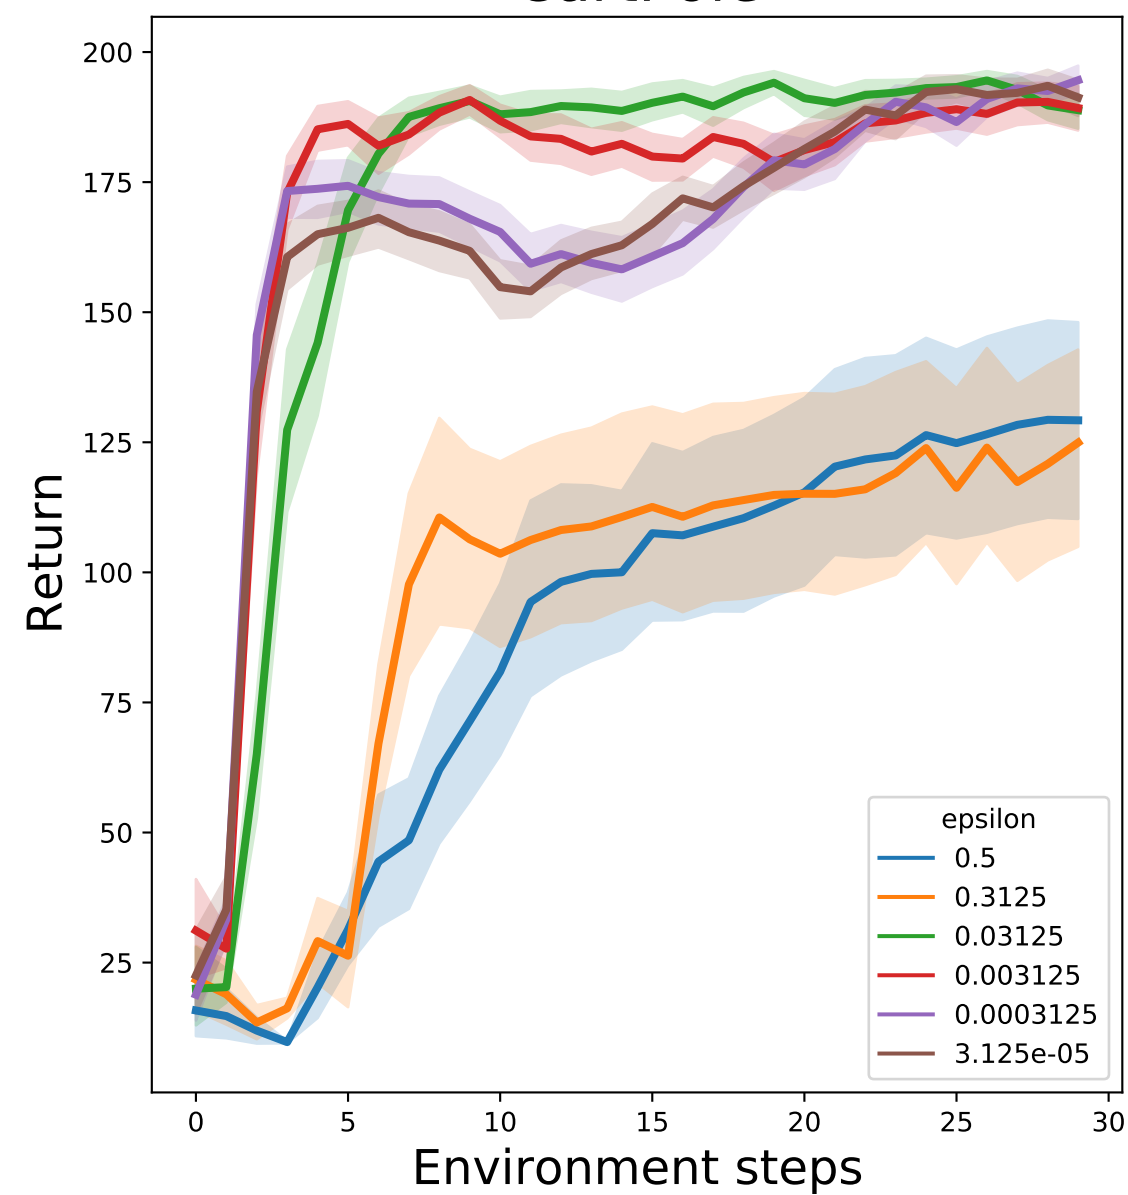

LunarLander

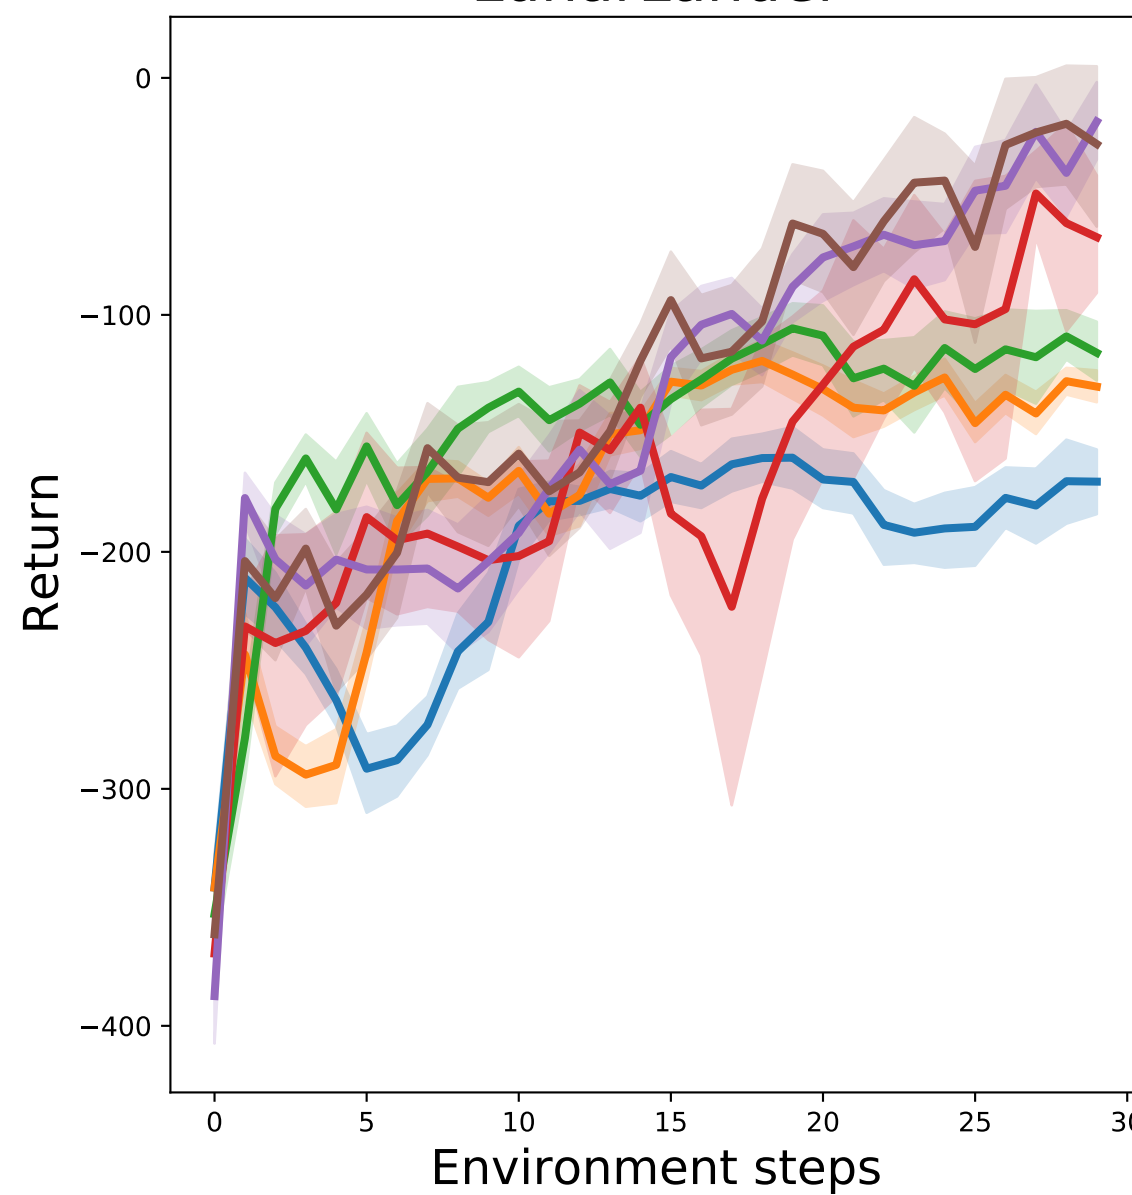

MountainCar

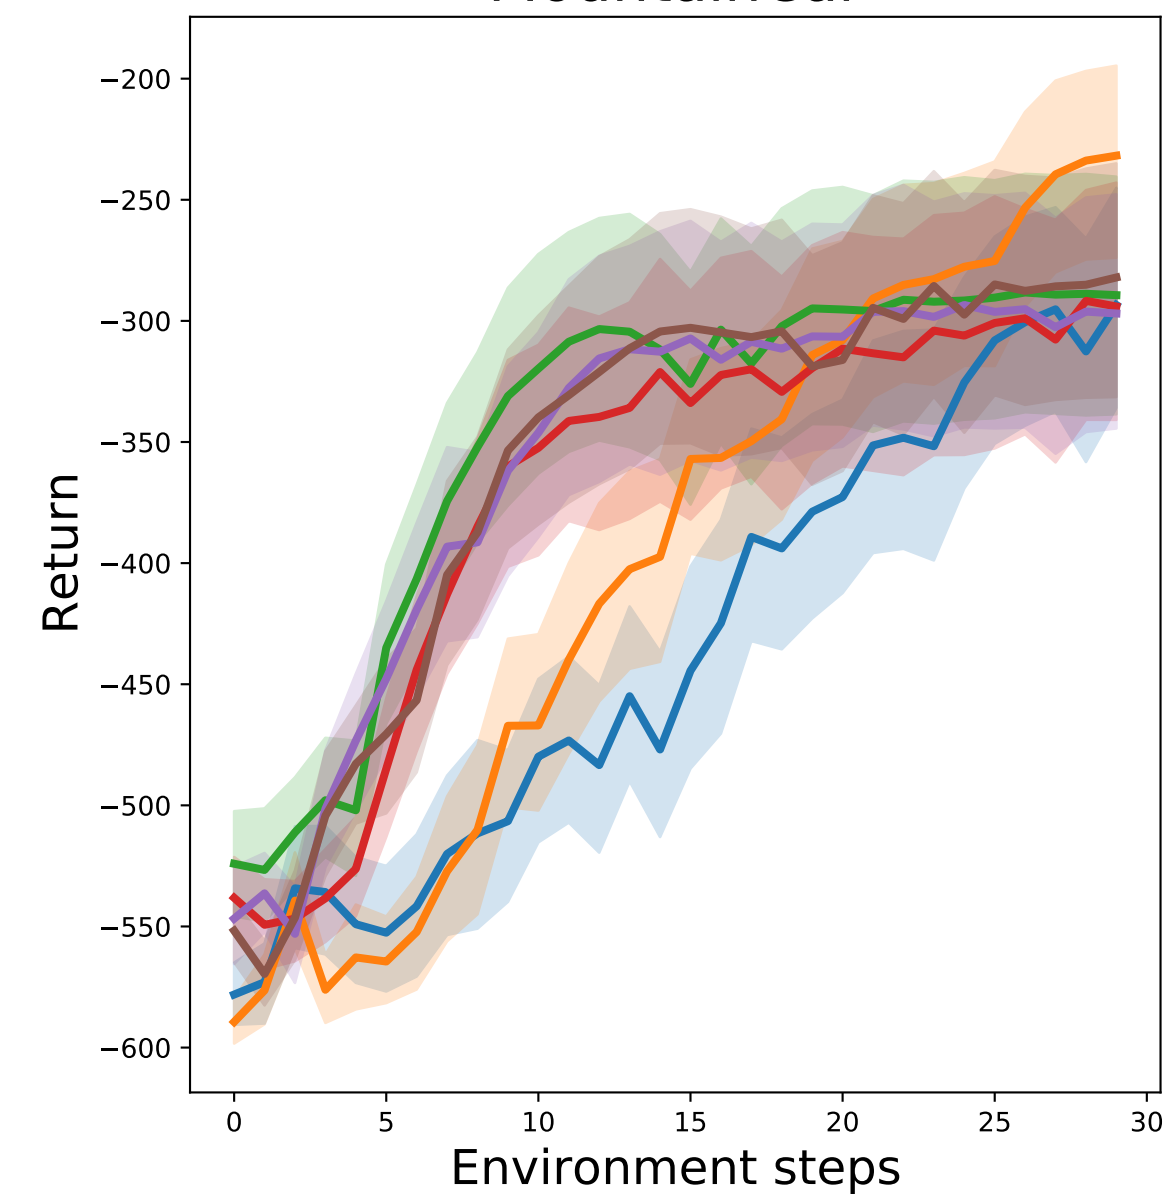

Acrobot

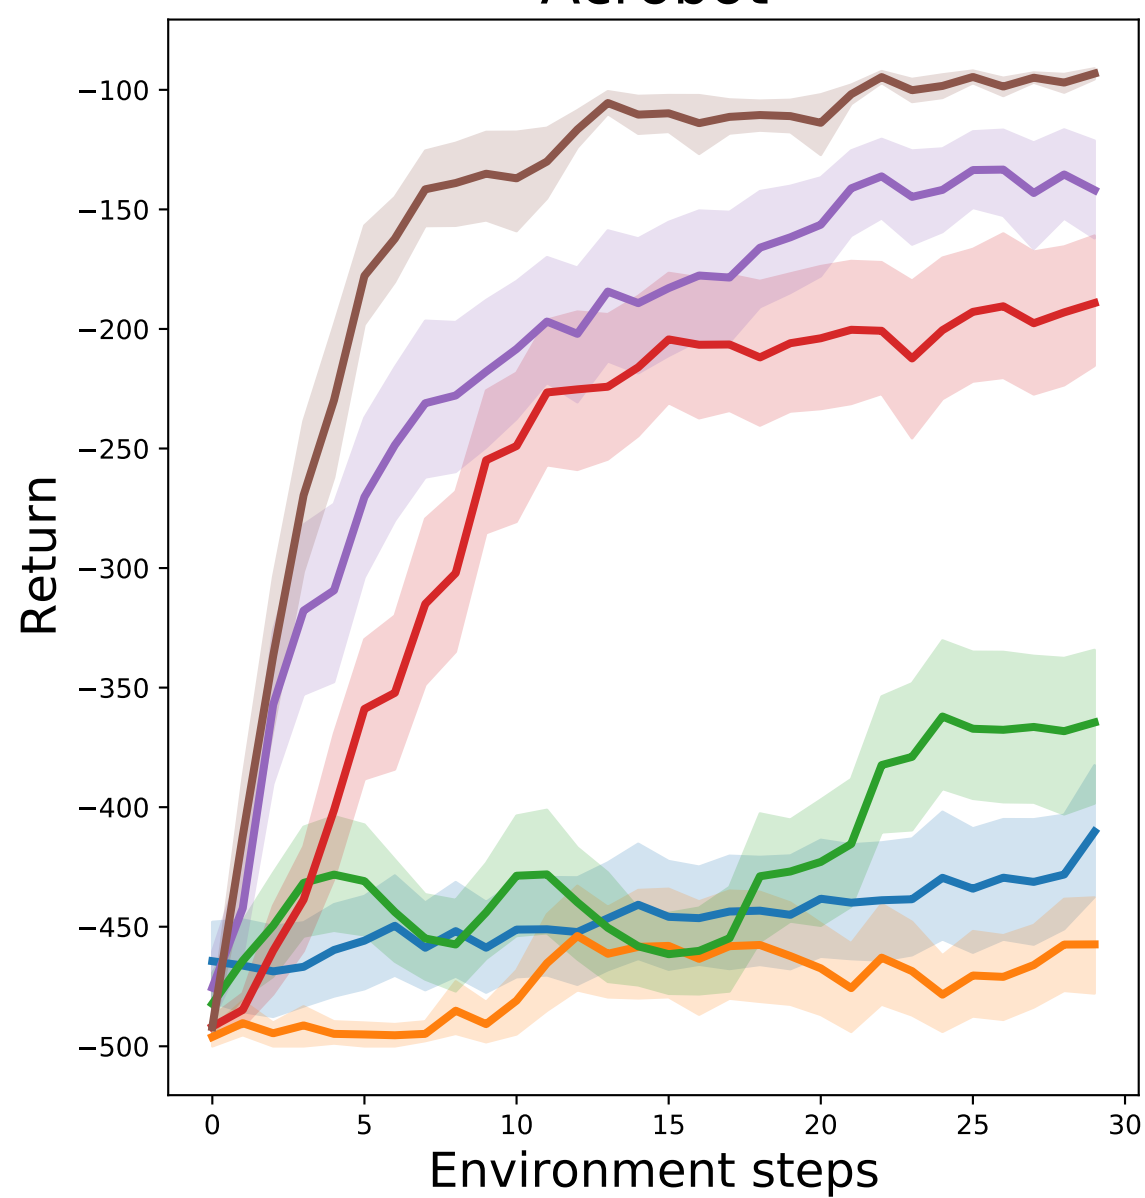

CartPole

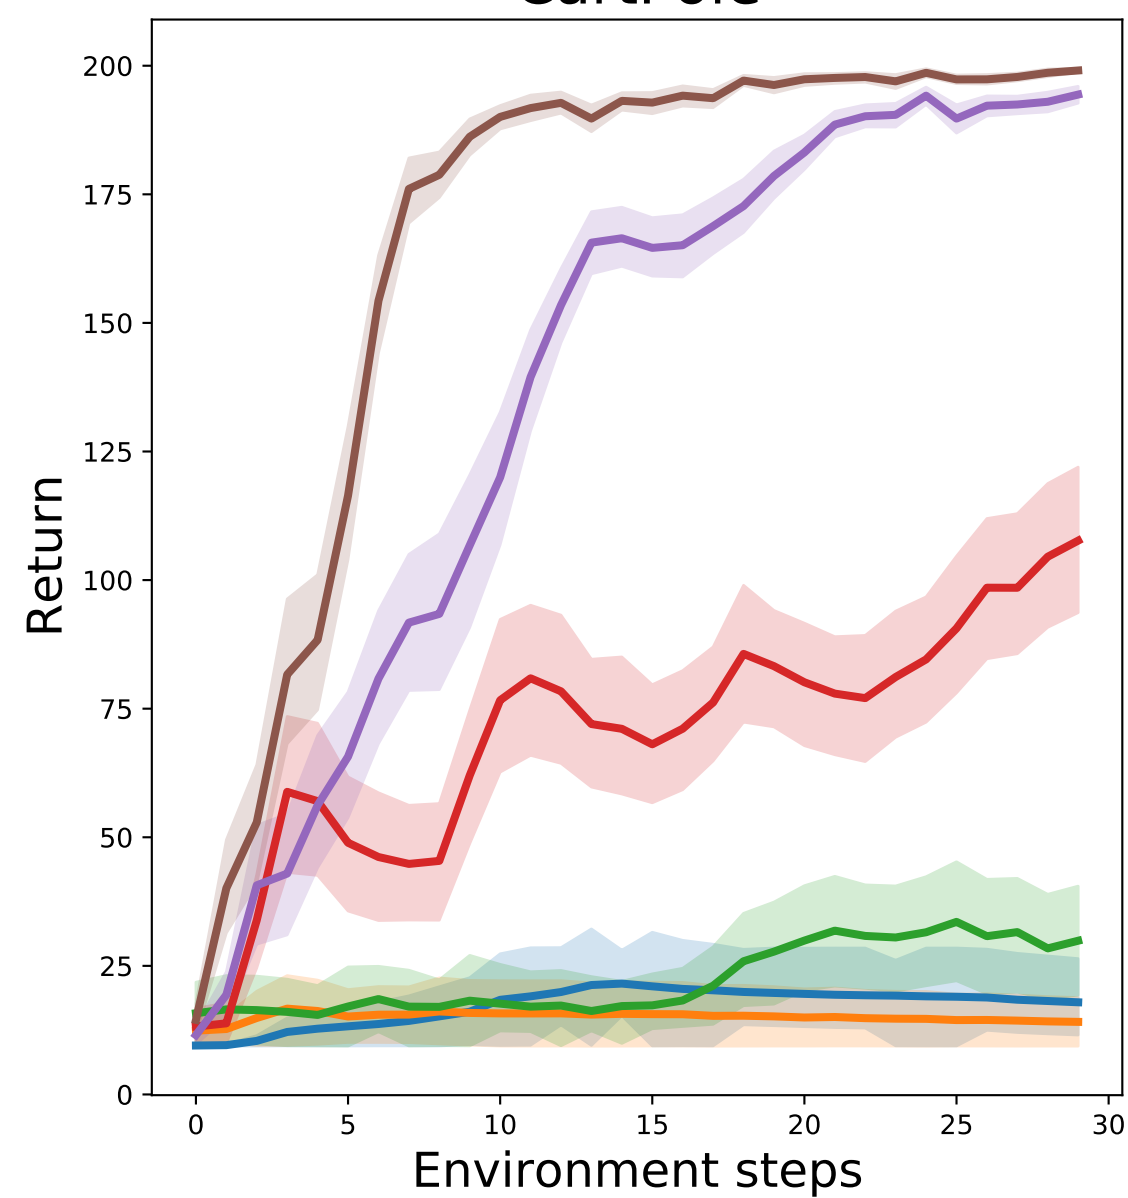

LunarLander

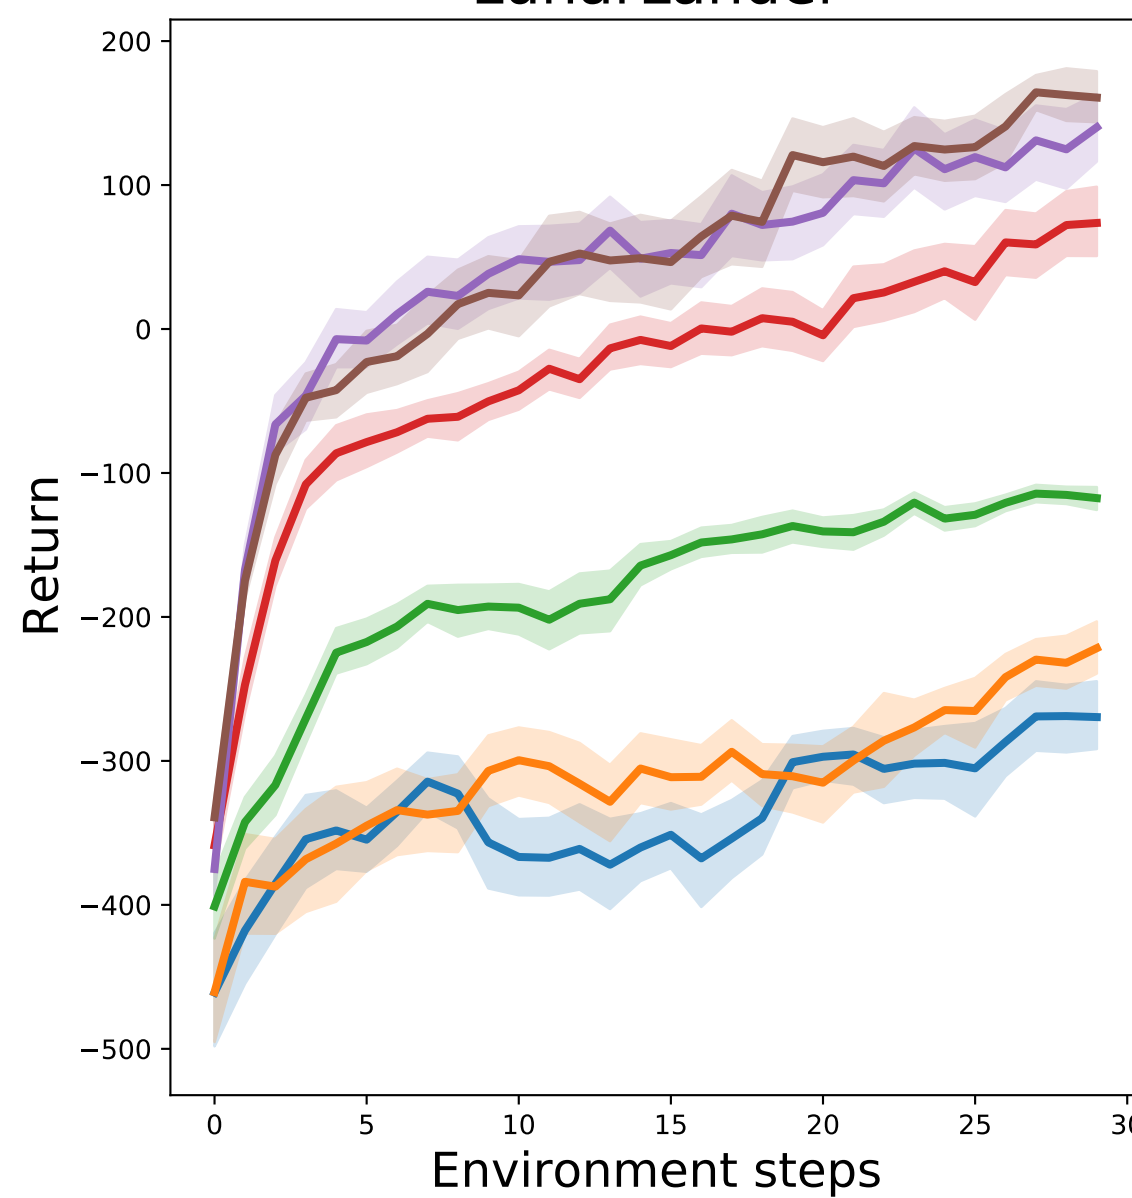

MountainCar

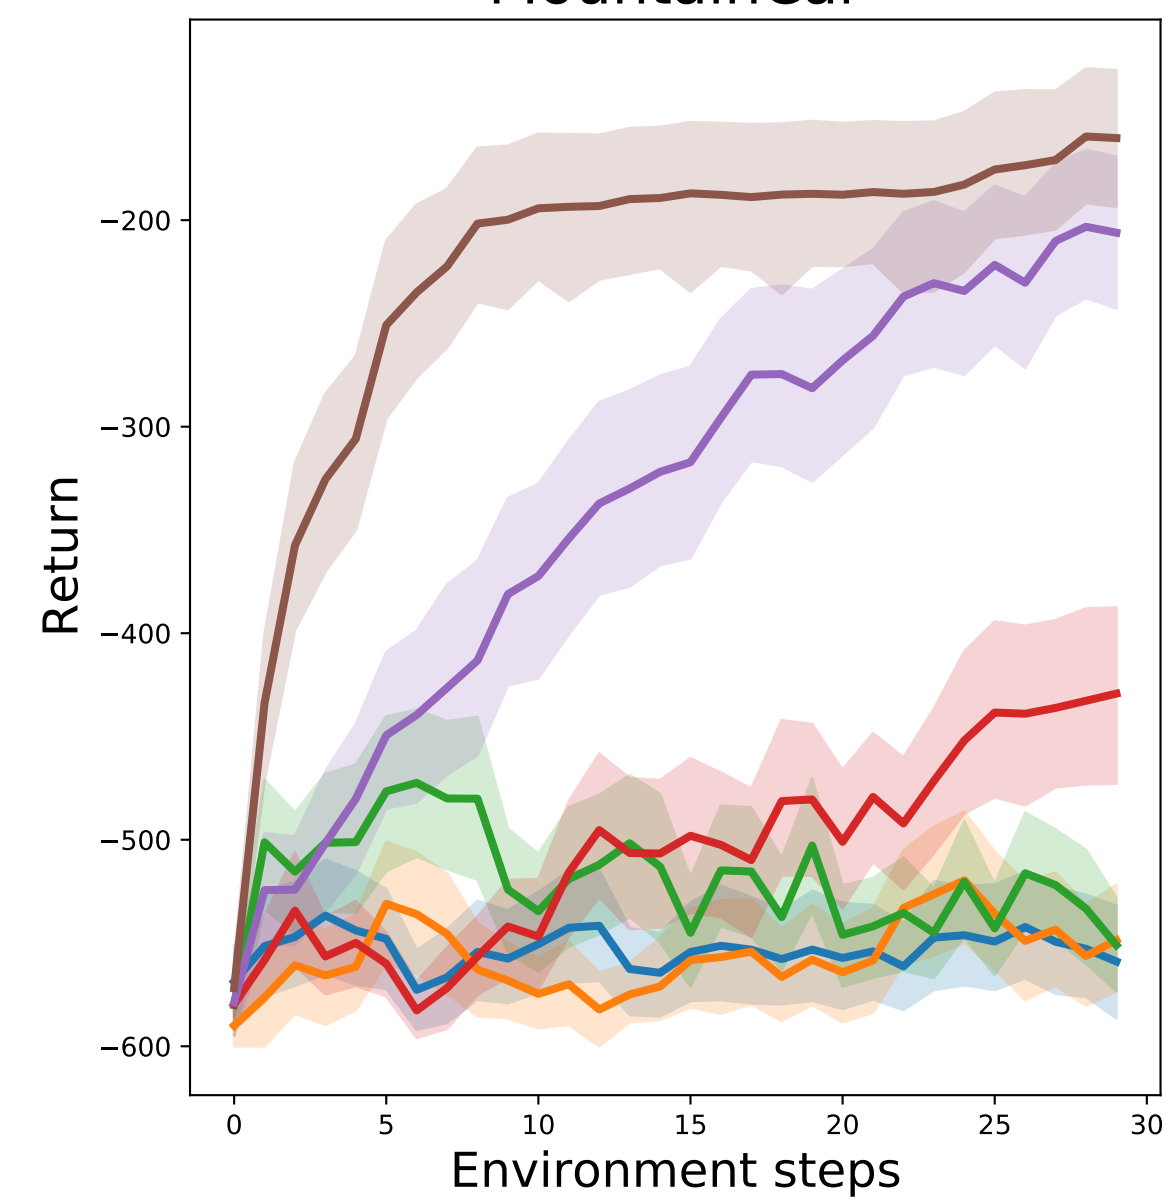

Supplement: supplementary_material [file attachment]

Acrobot

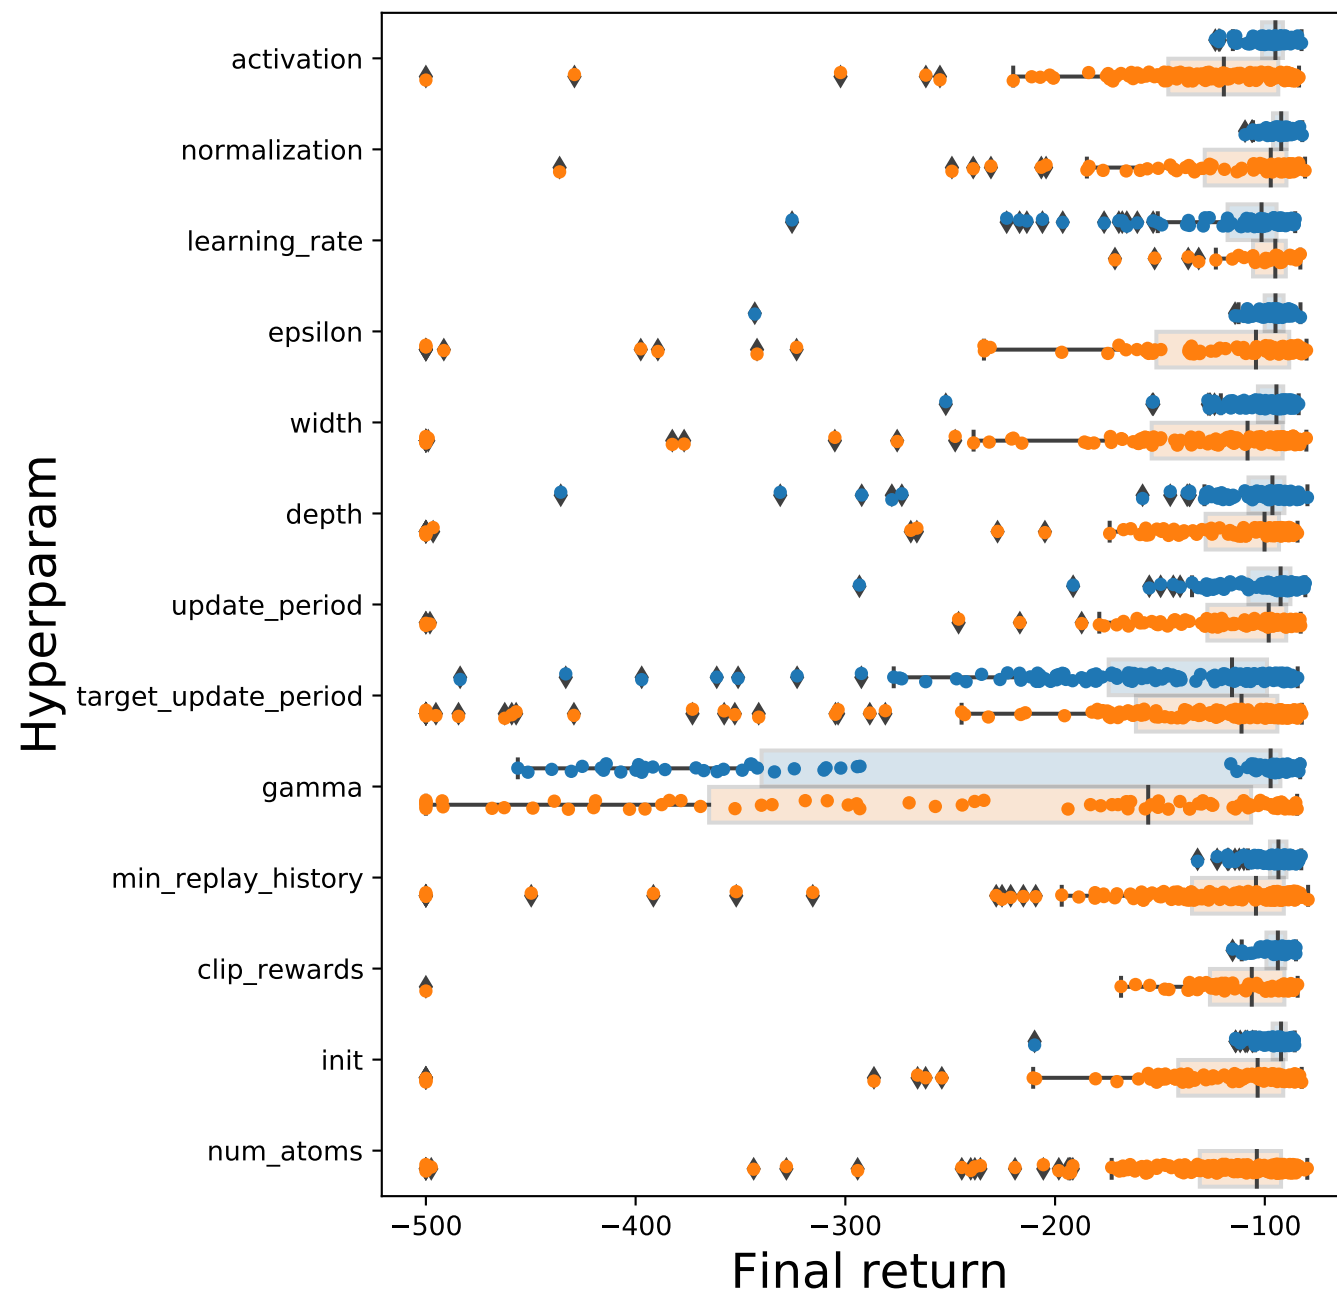

CartPole

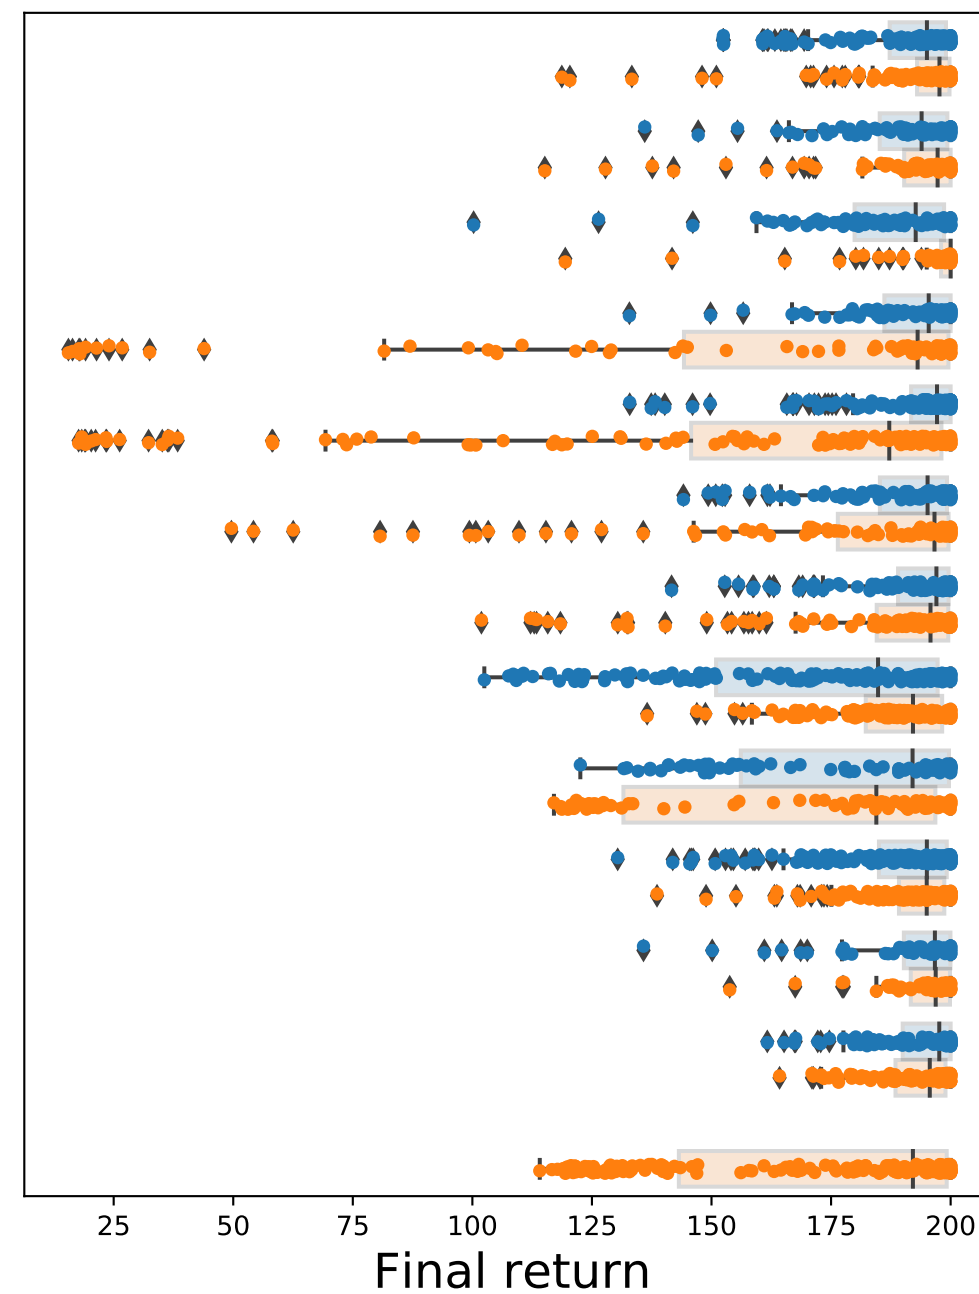

LunarLander

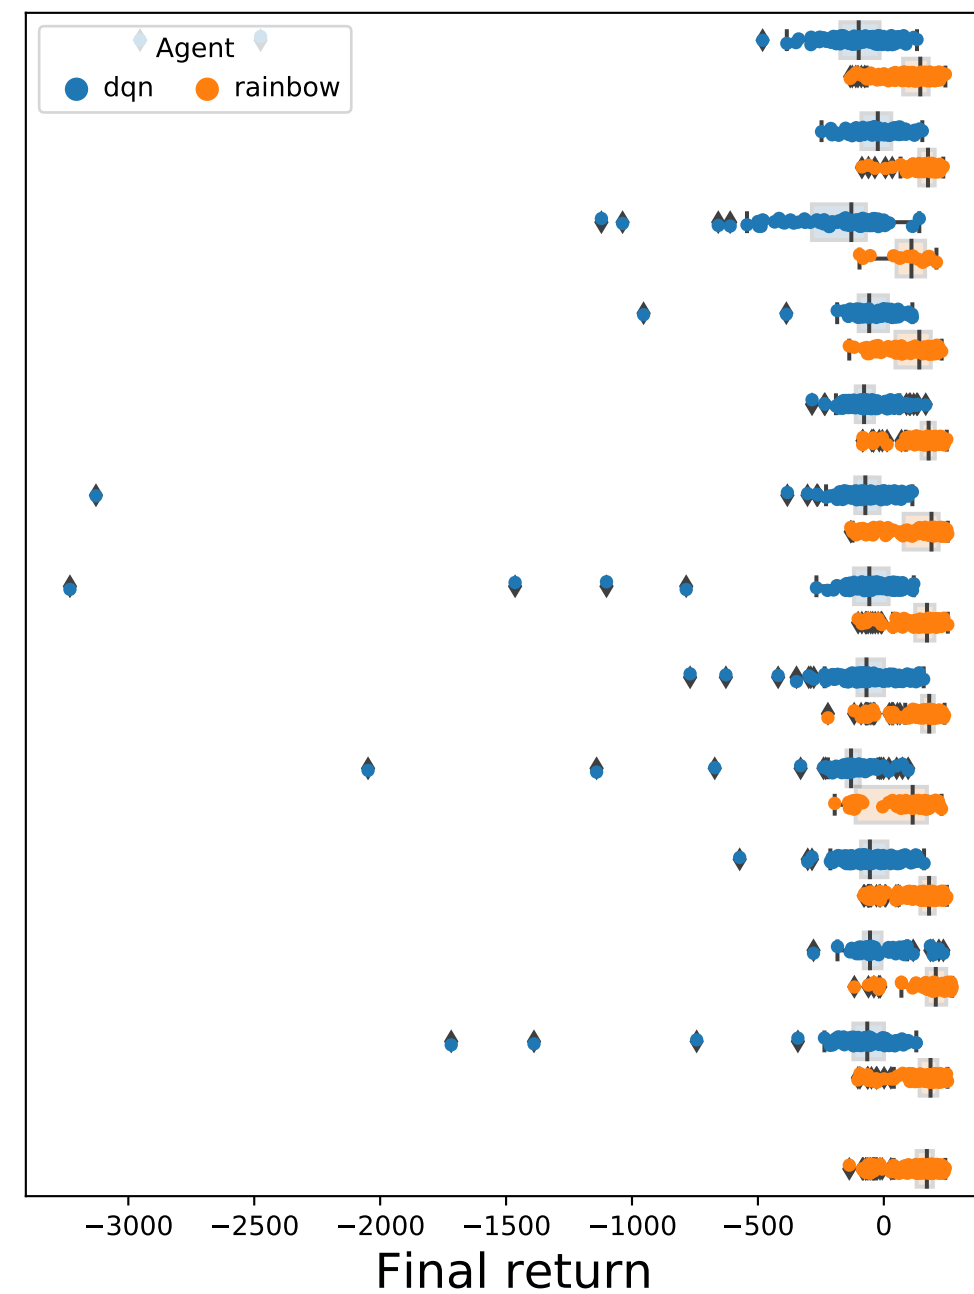

MountainCar

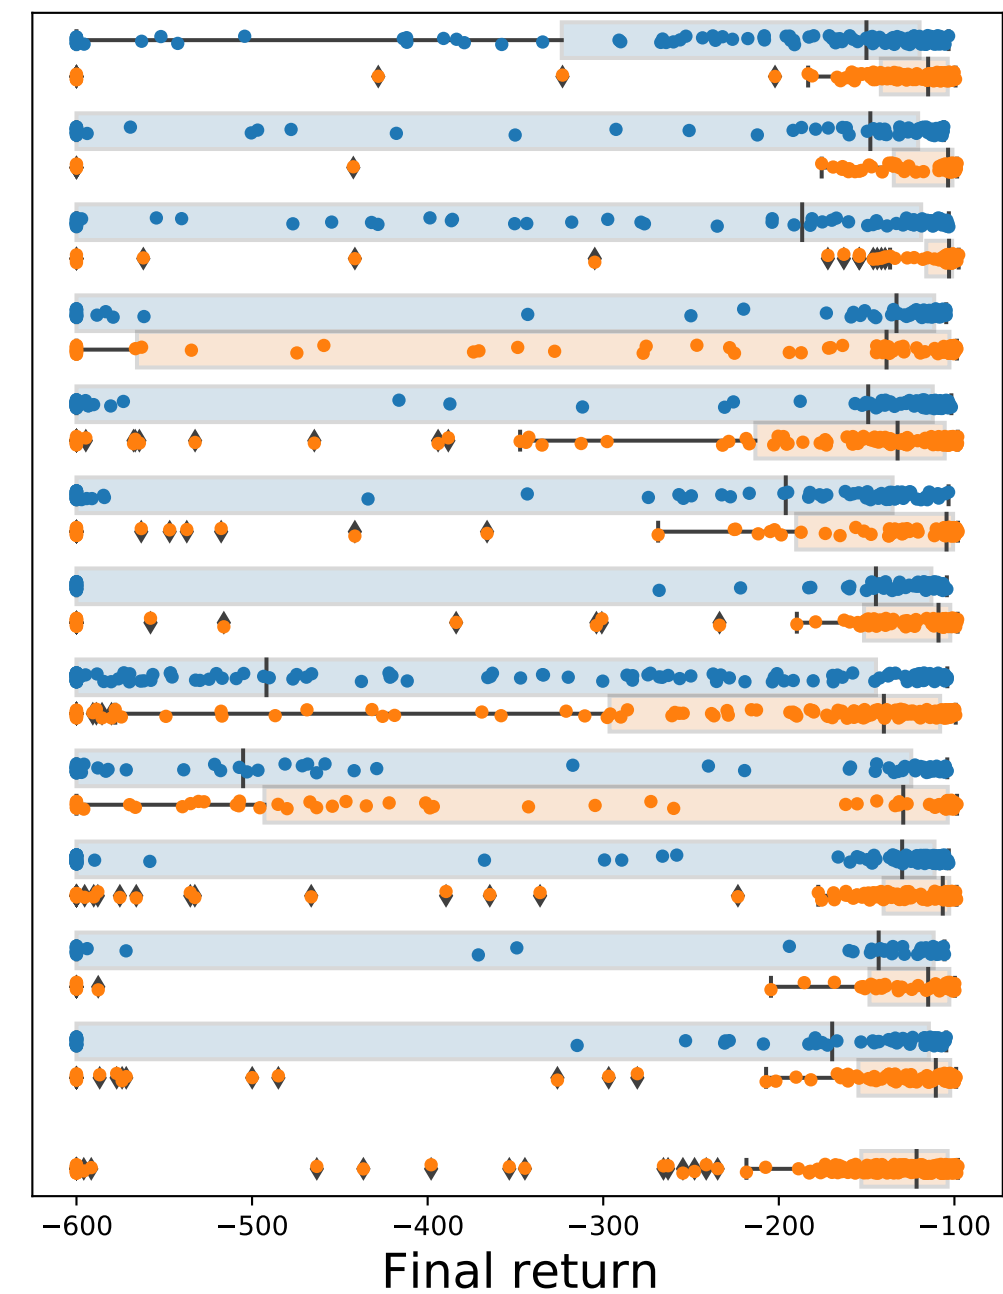

Supplement: supplementary_material [file attachment]

Acrobot

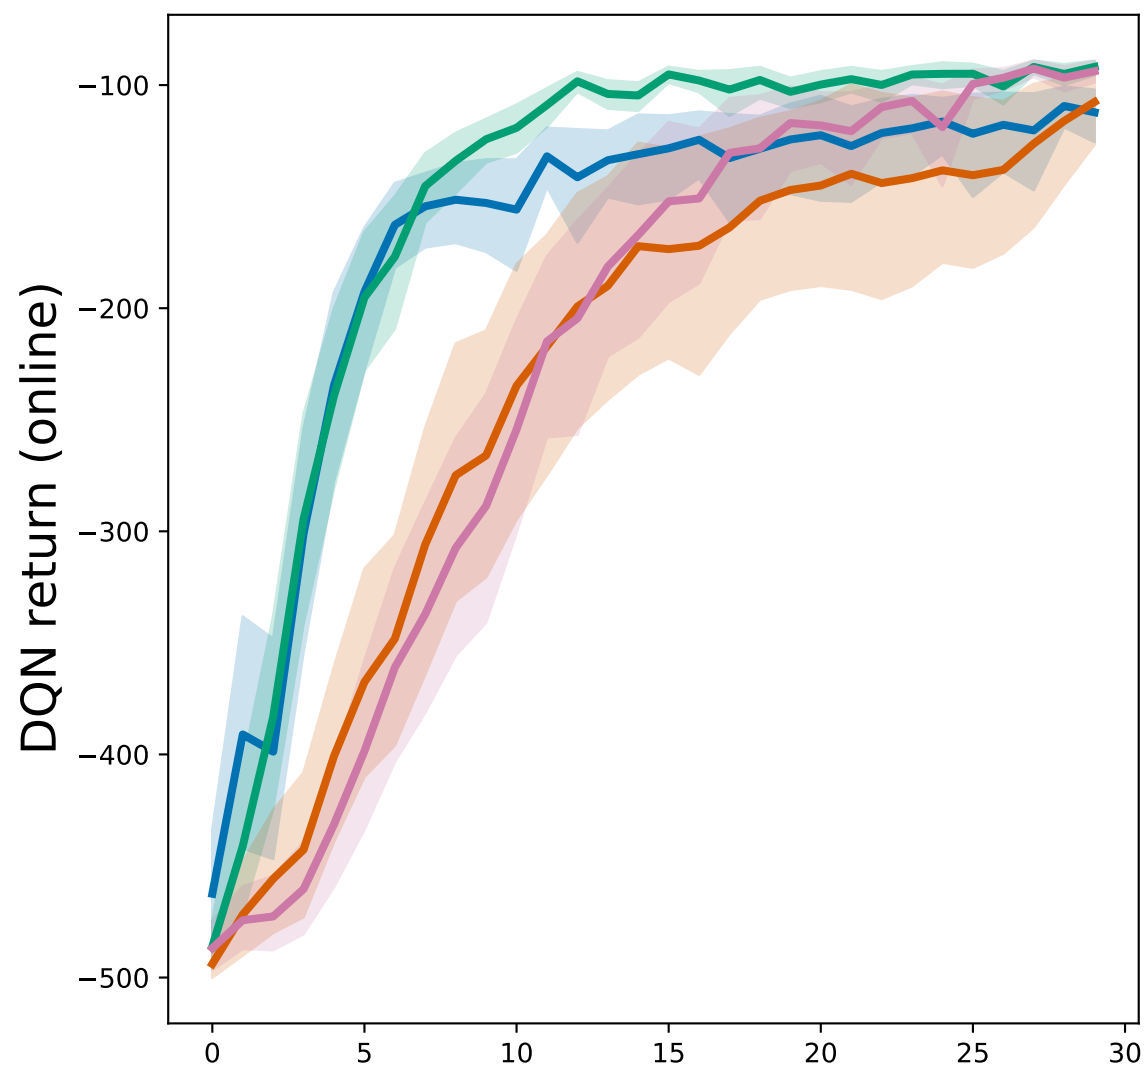

CartPole

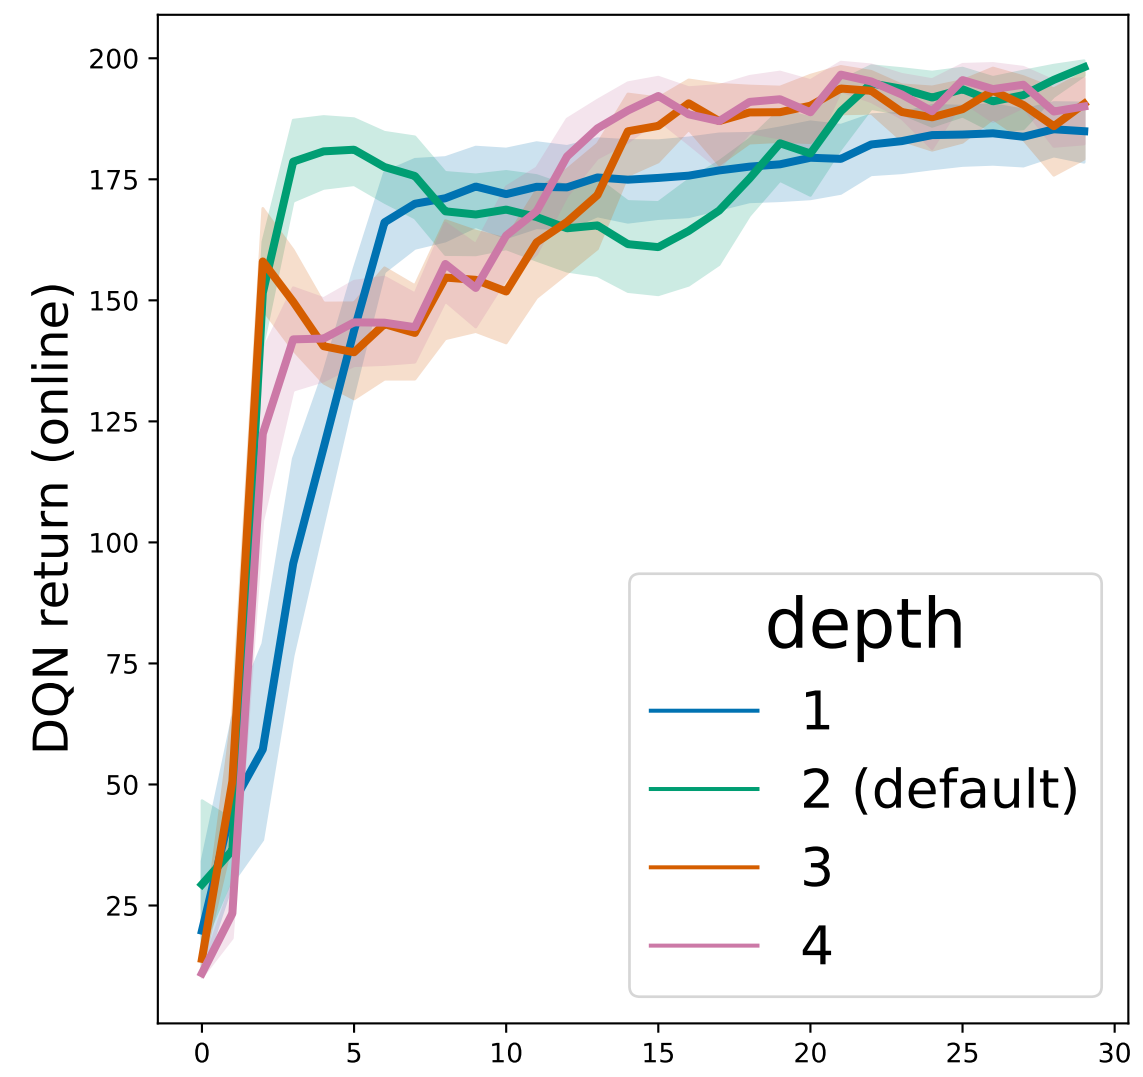

LunarLander

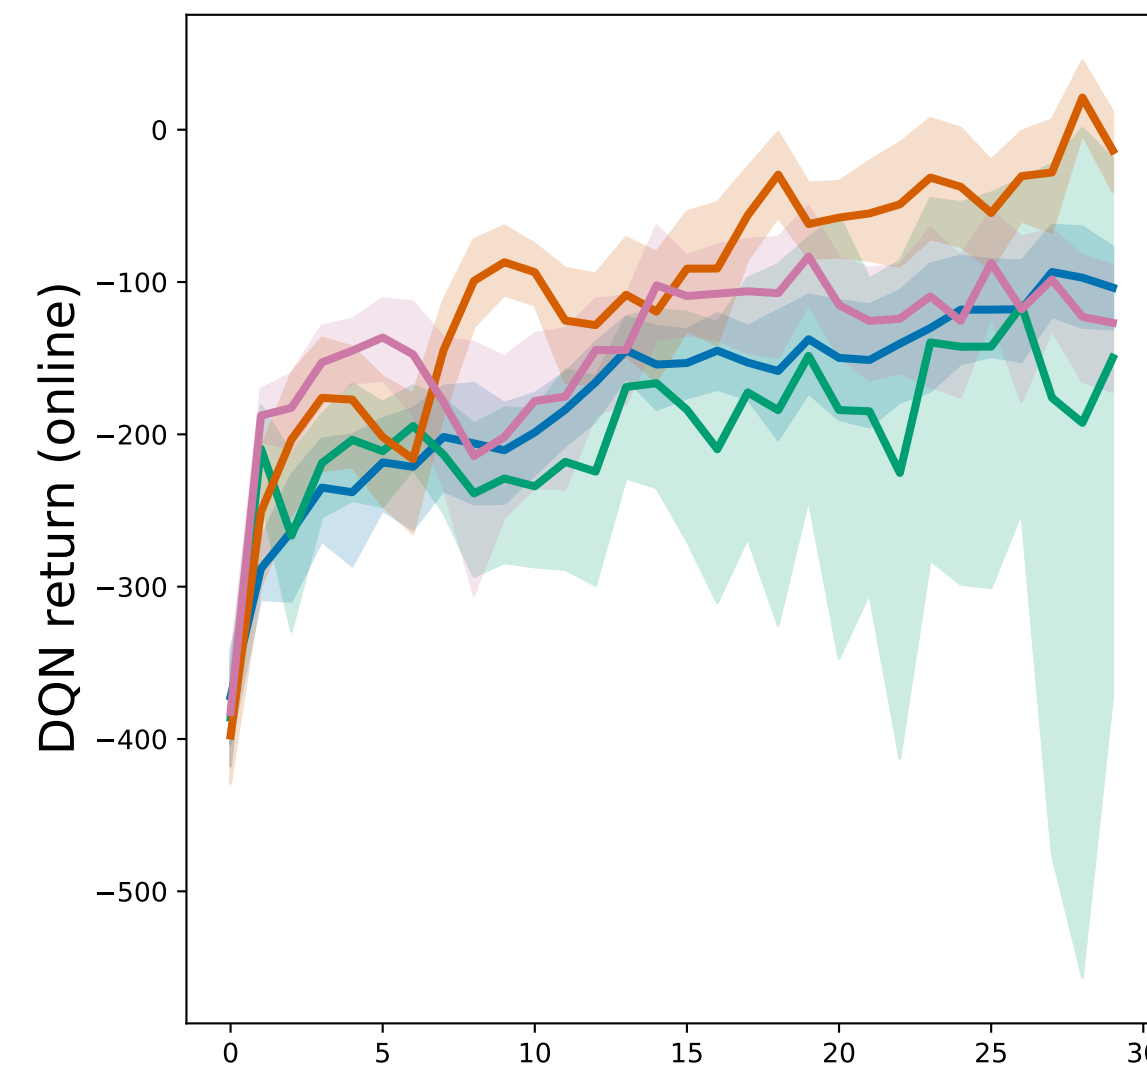

MountainCar

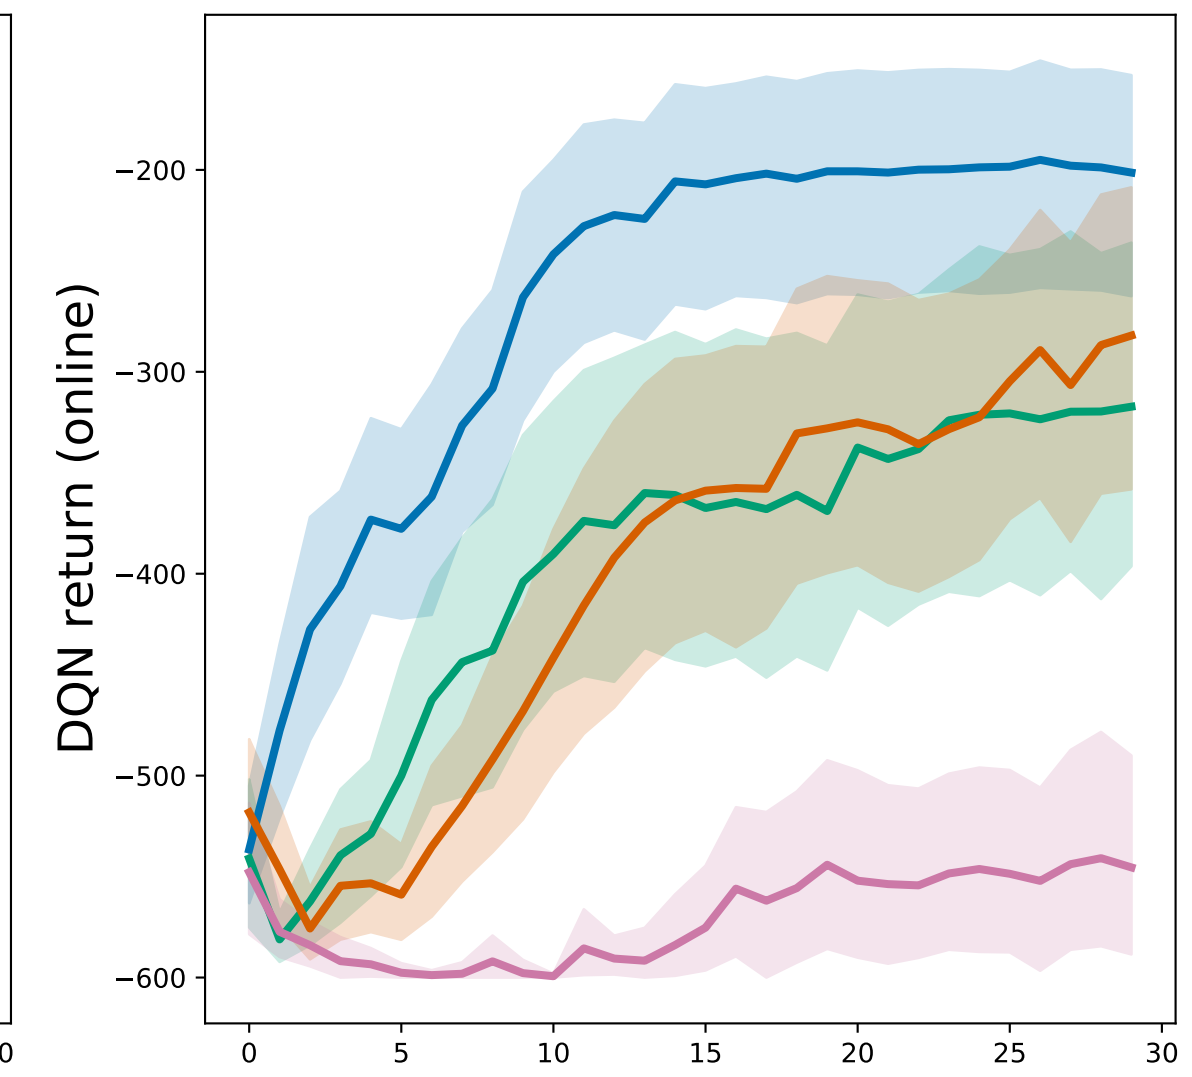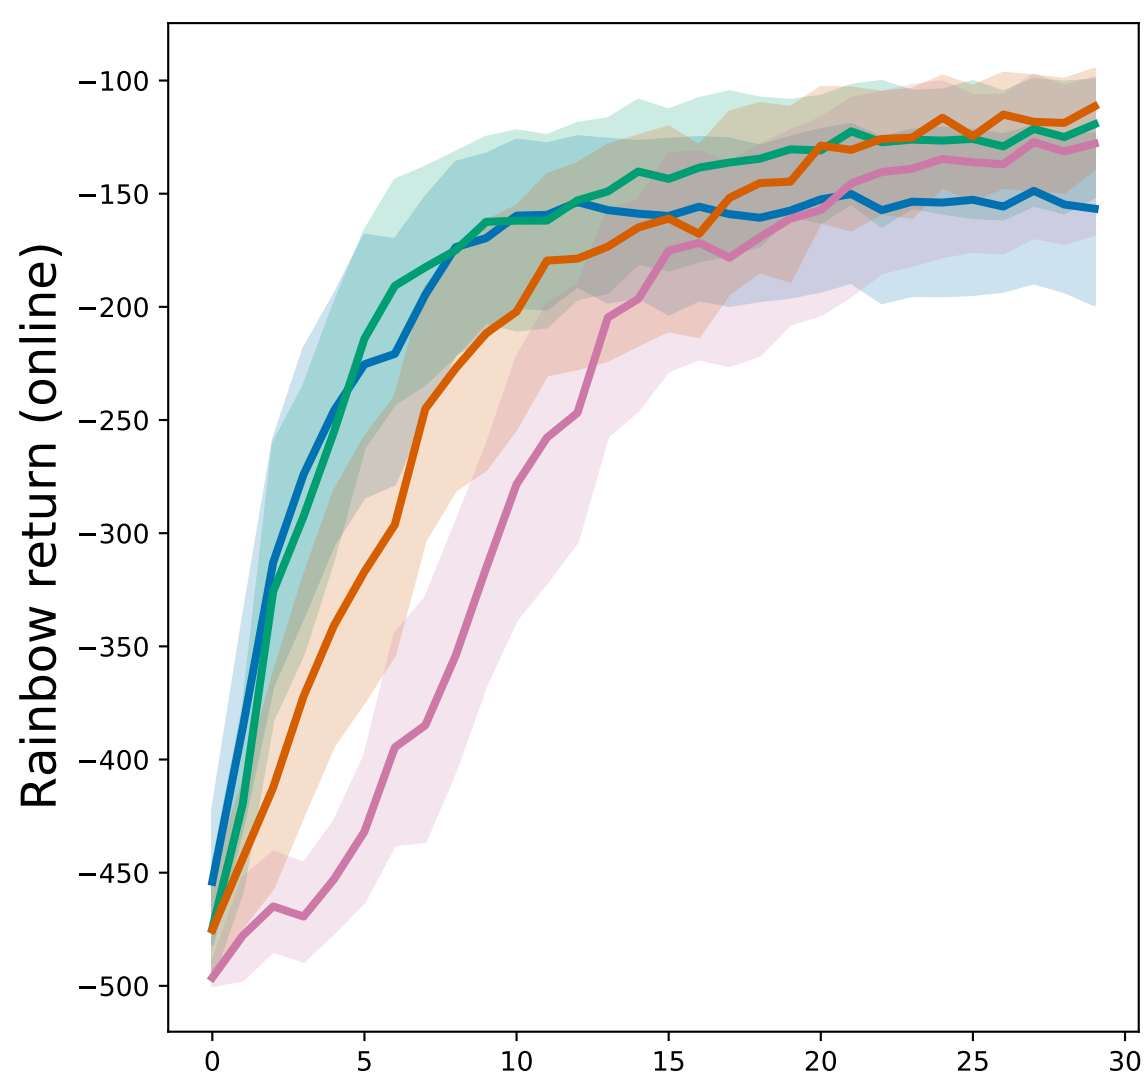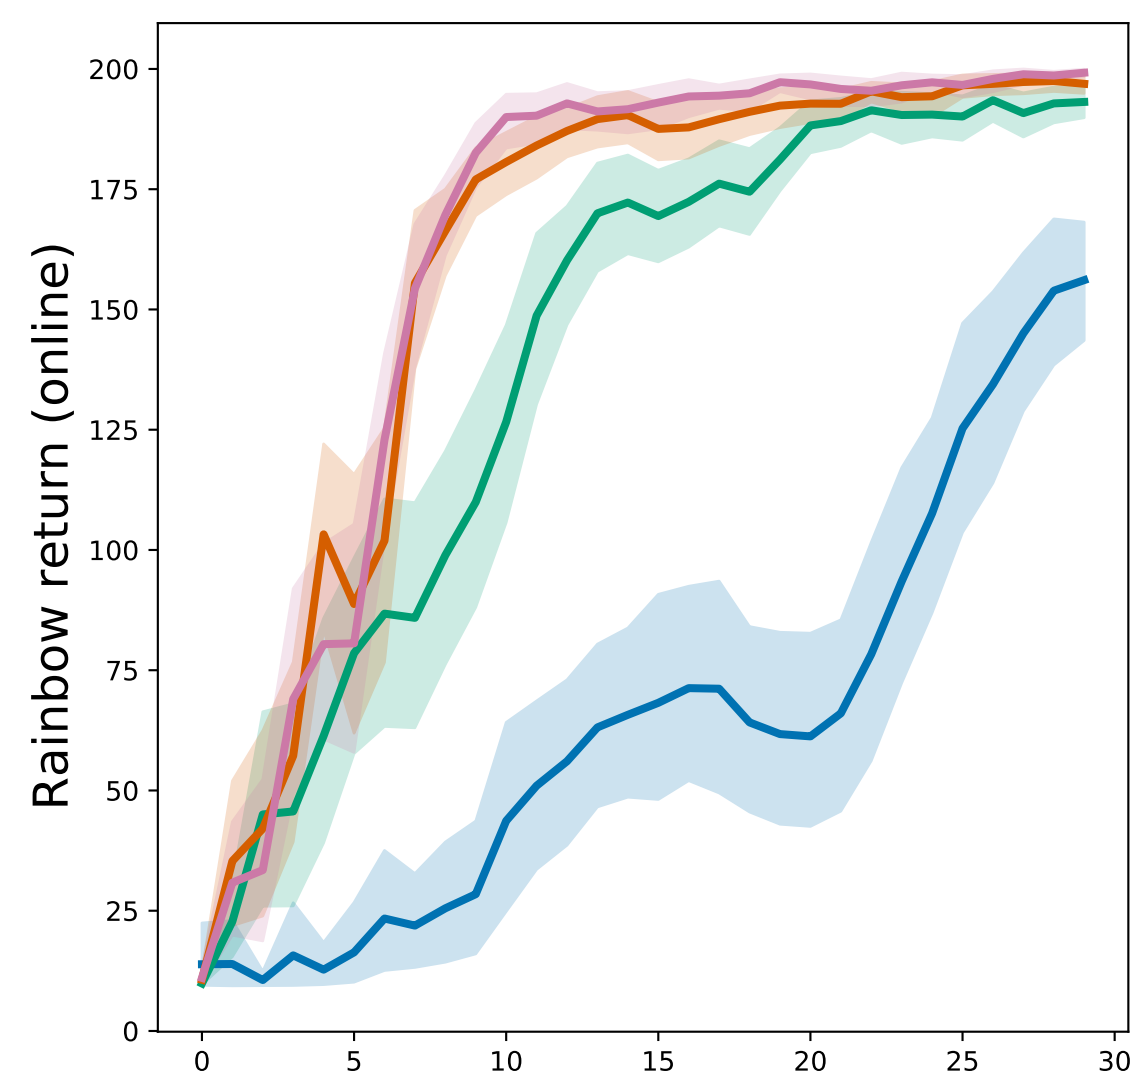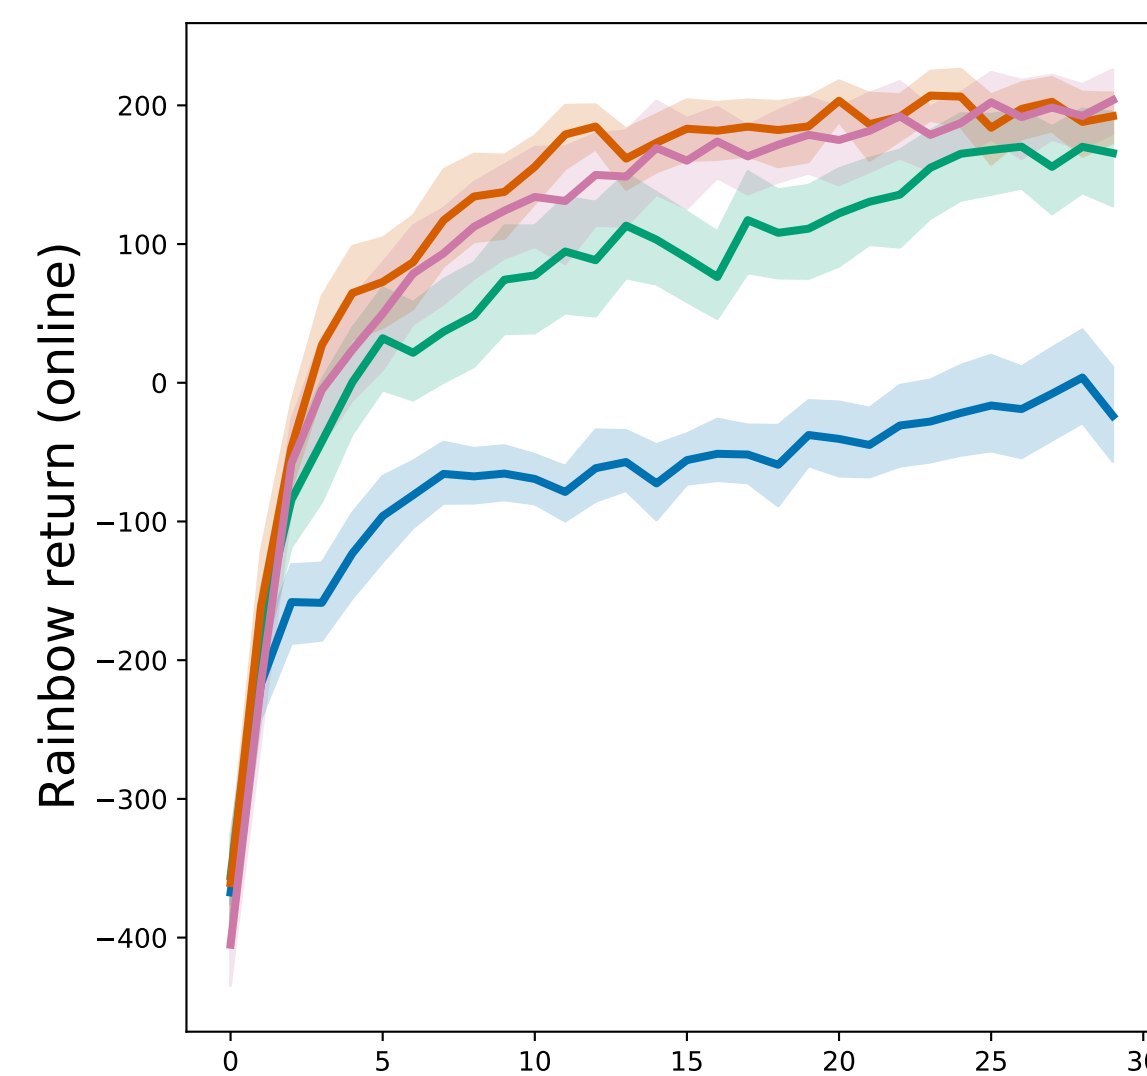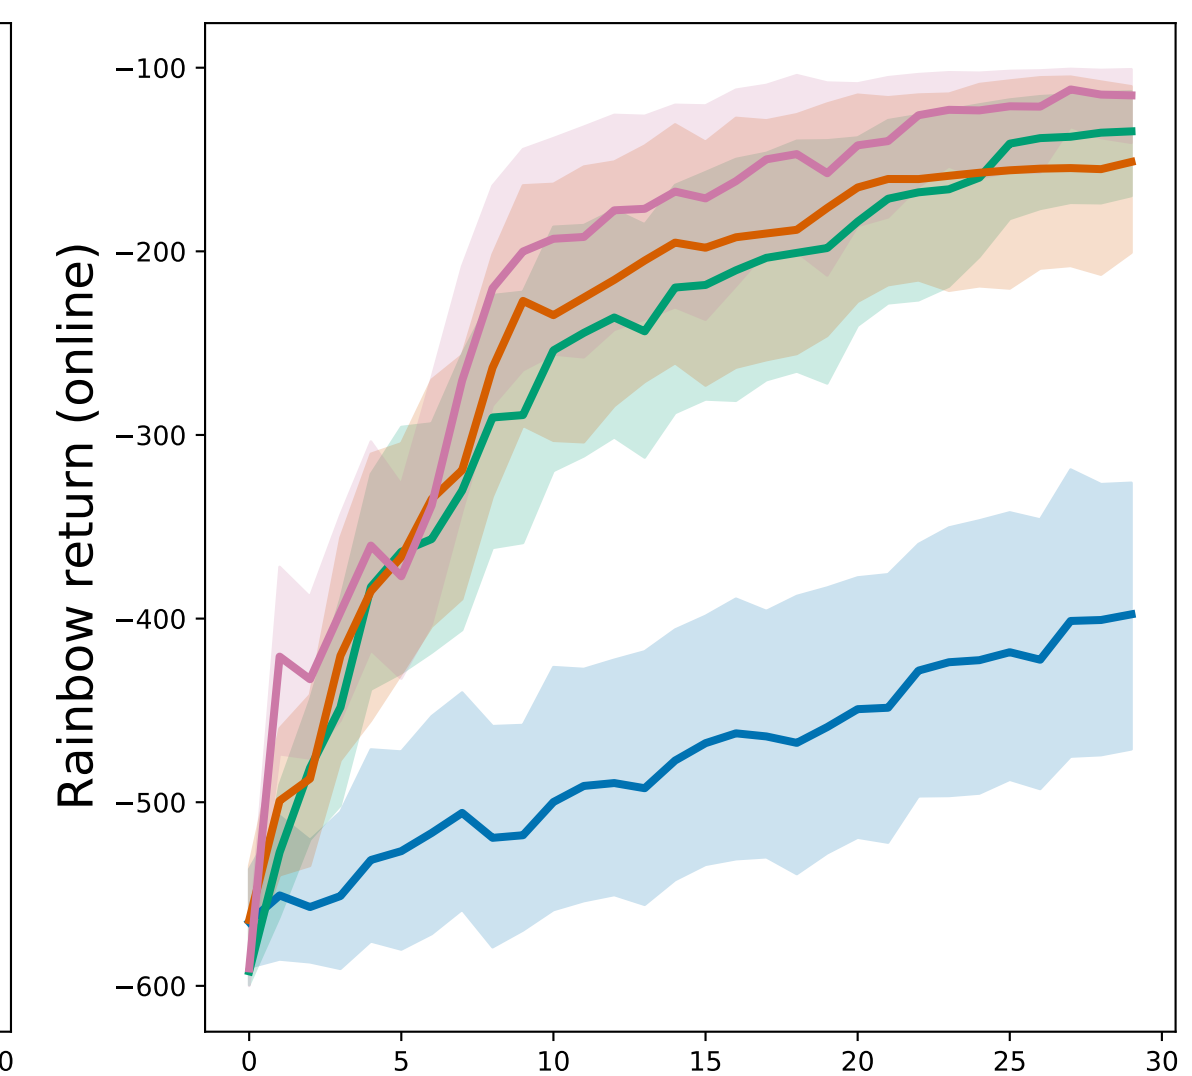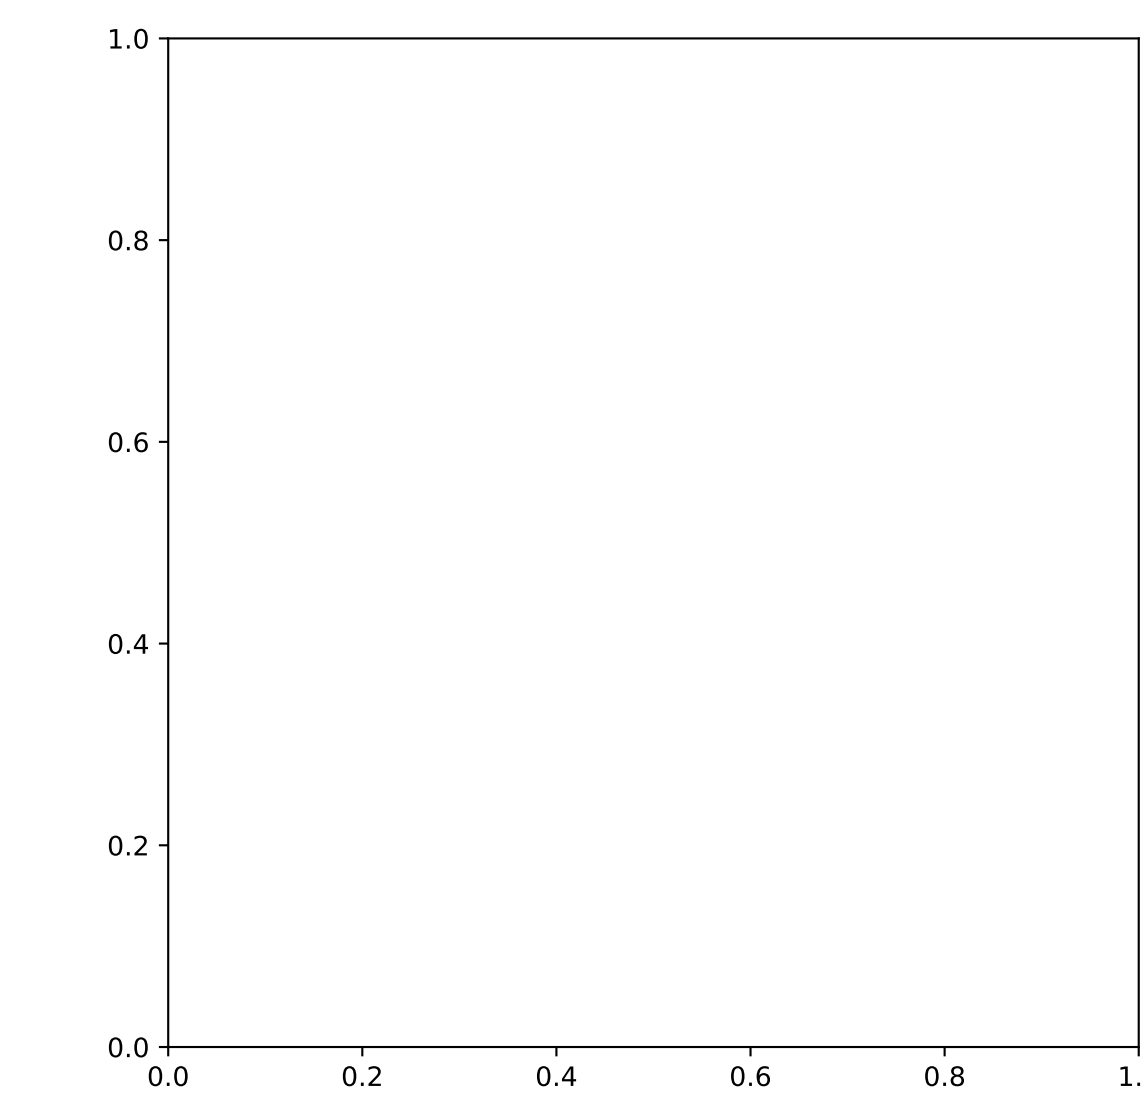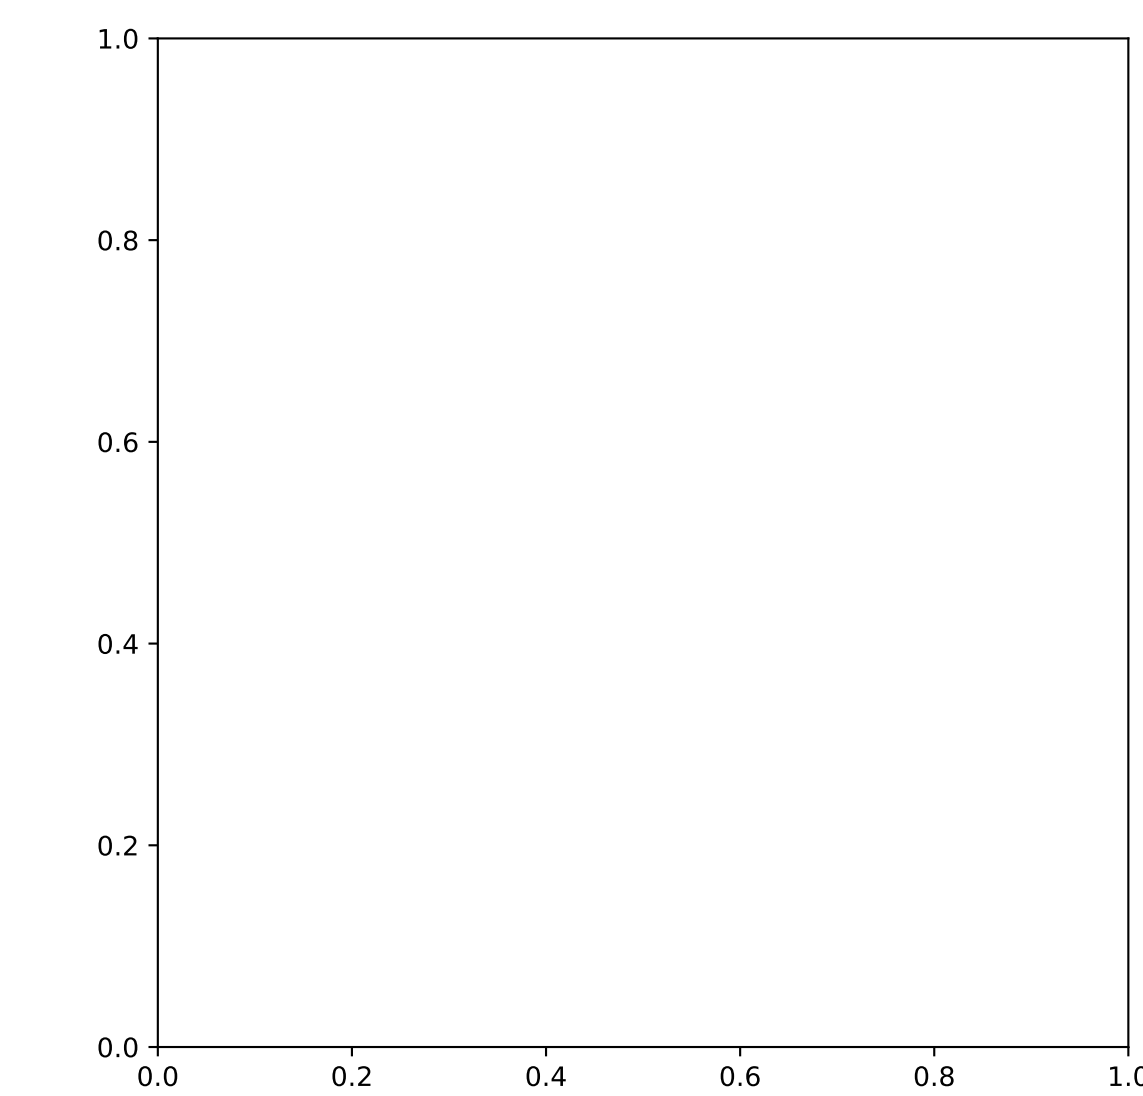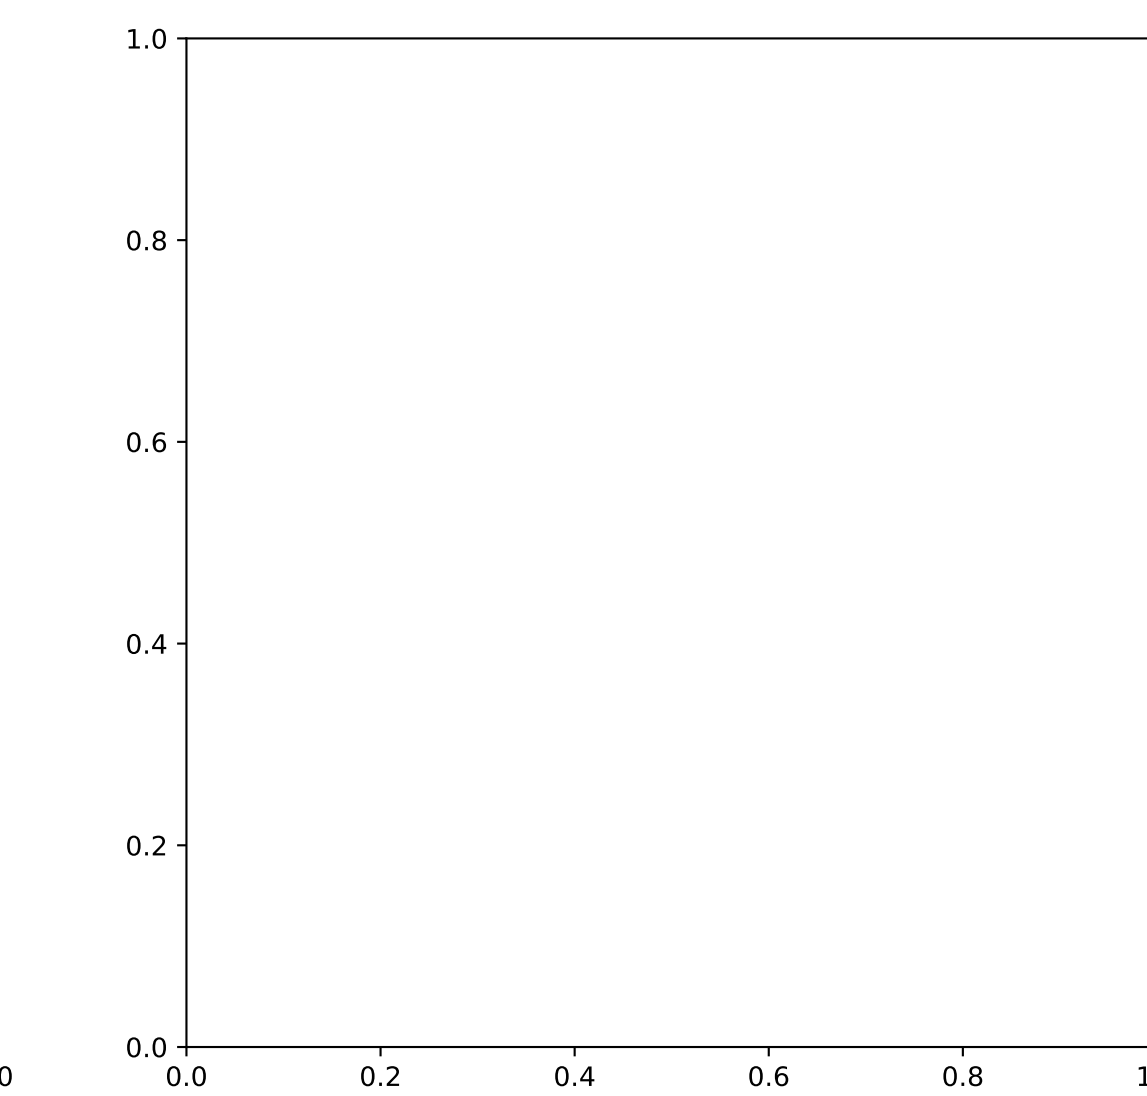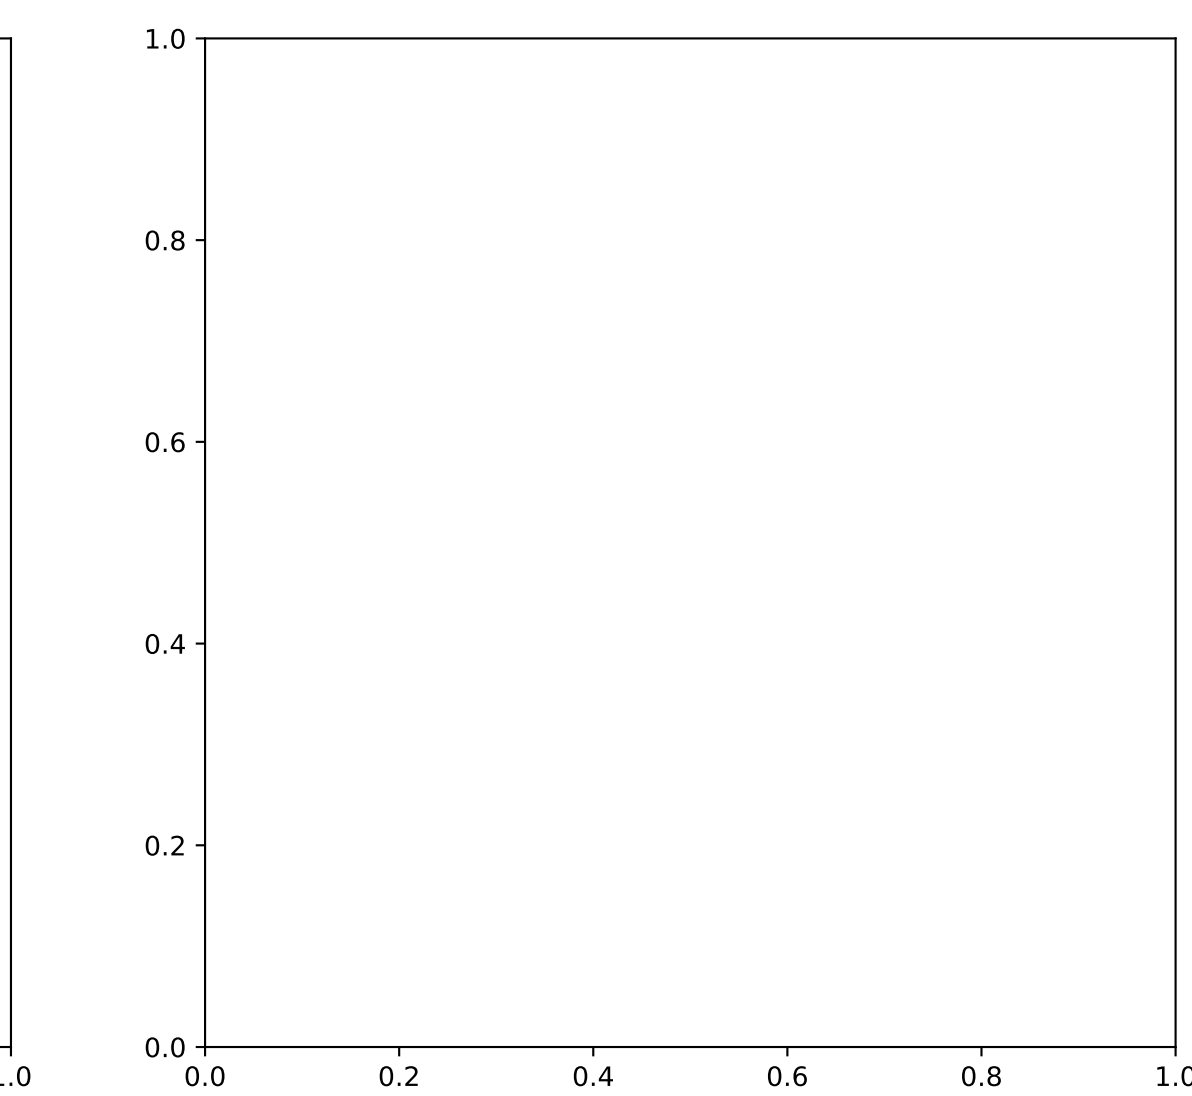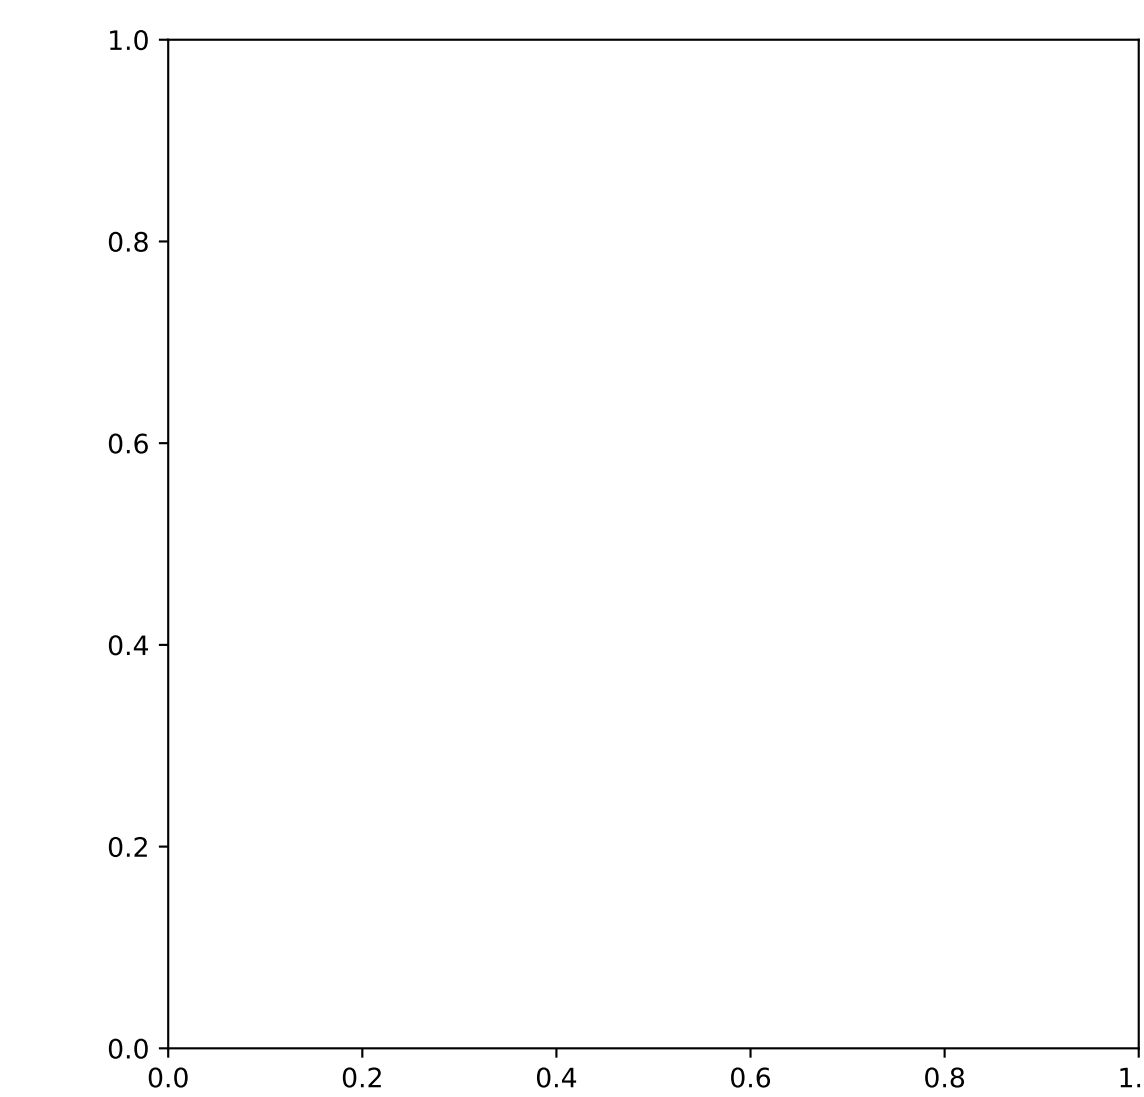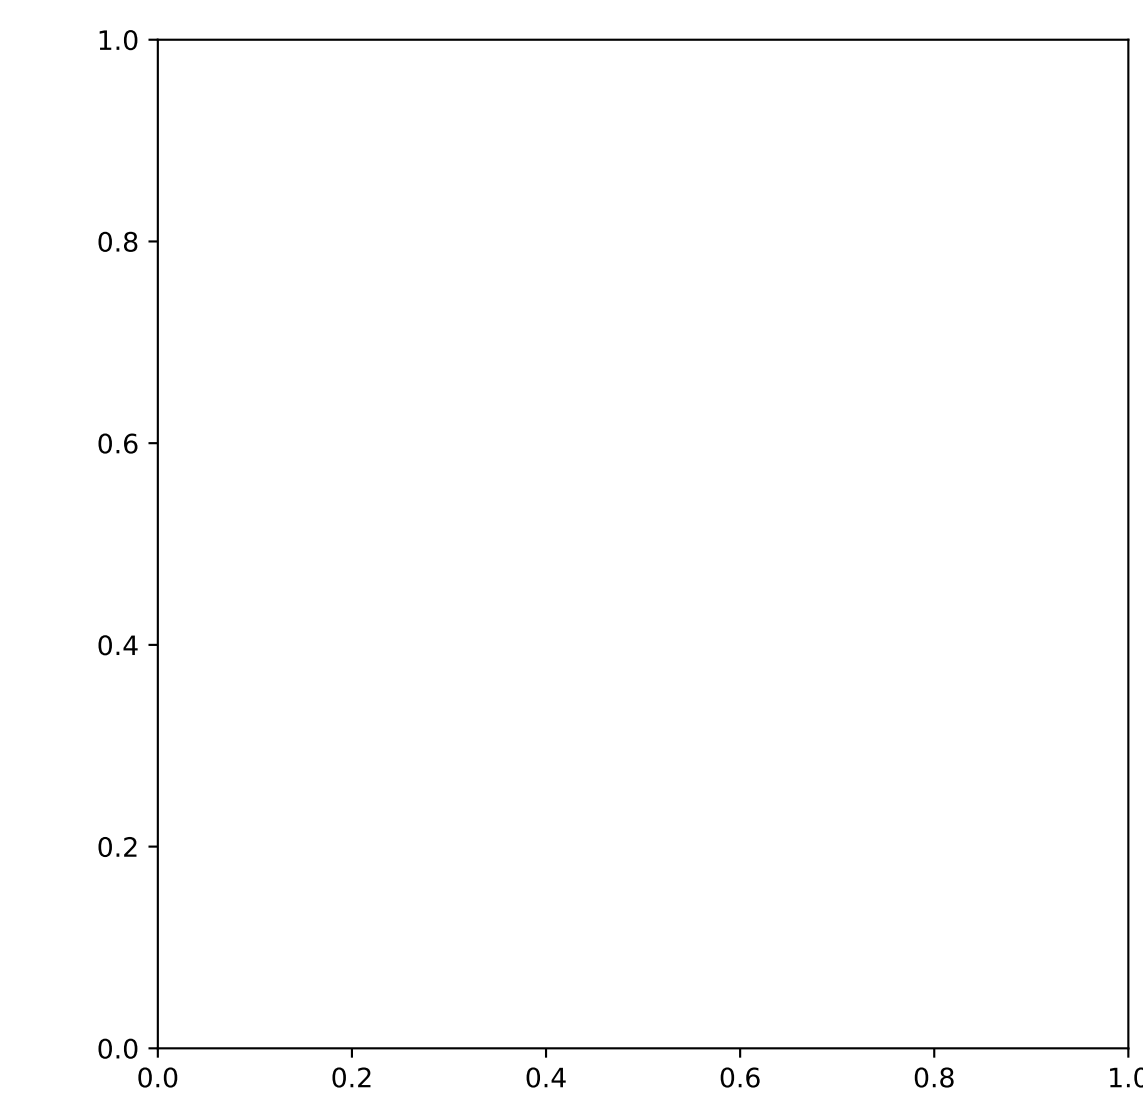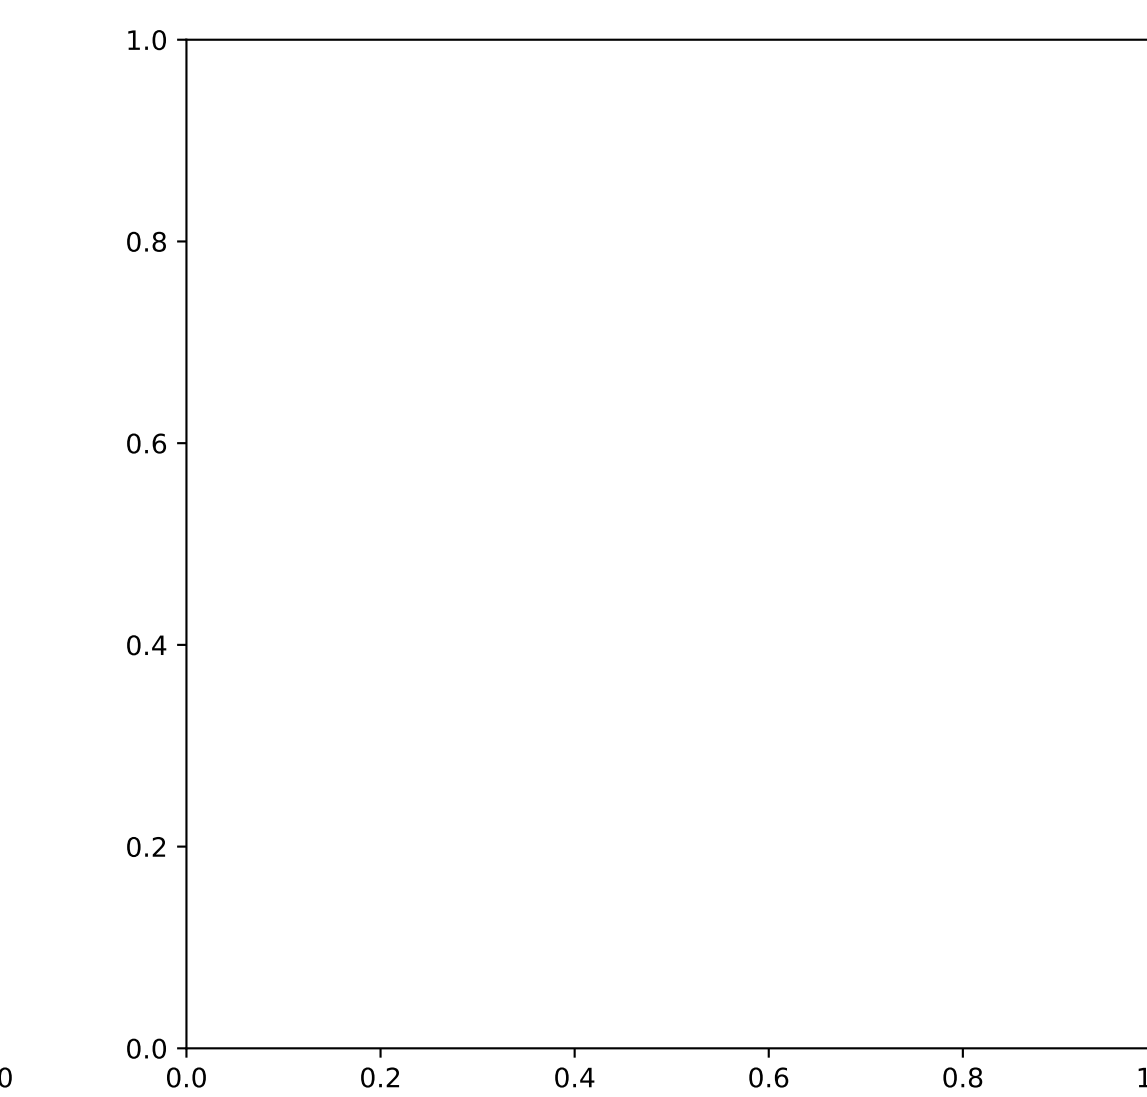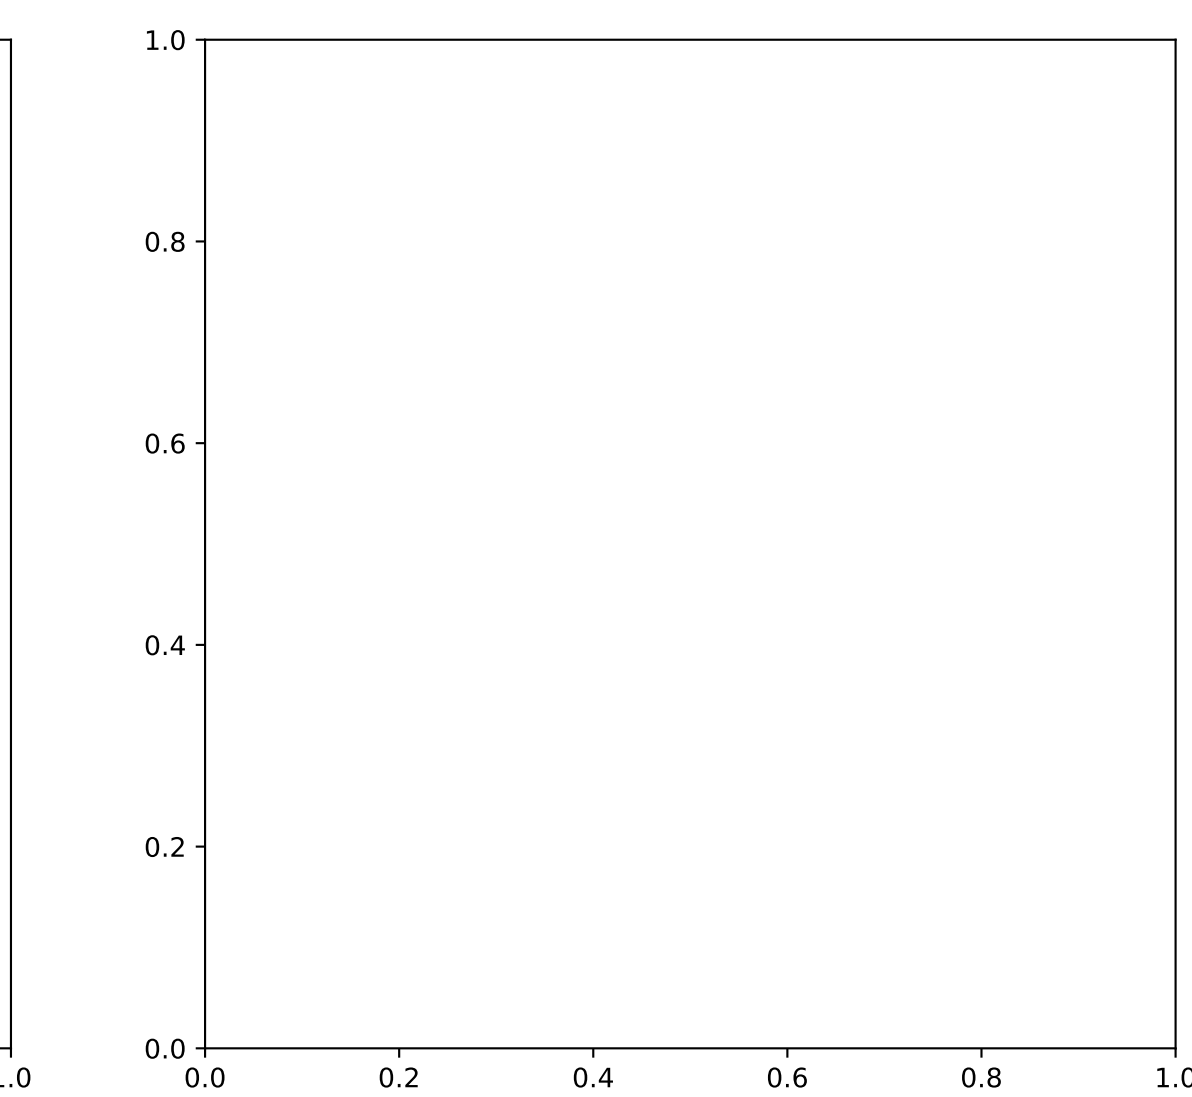

Supplement: supplementary_material [file attachment]

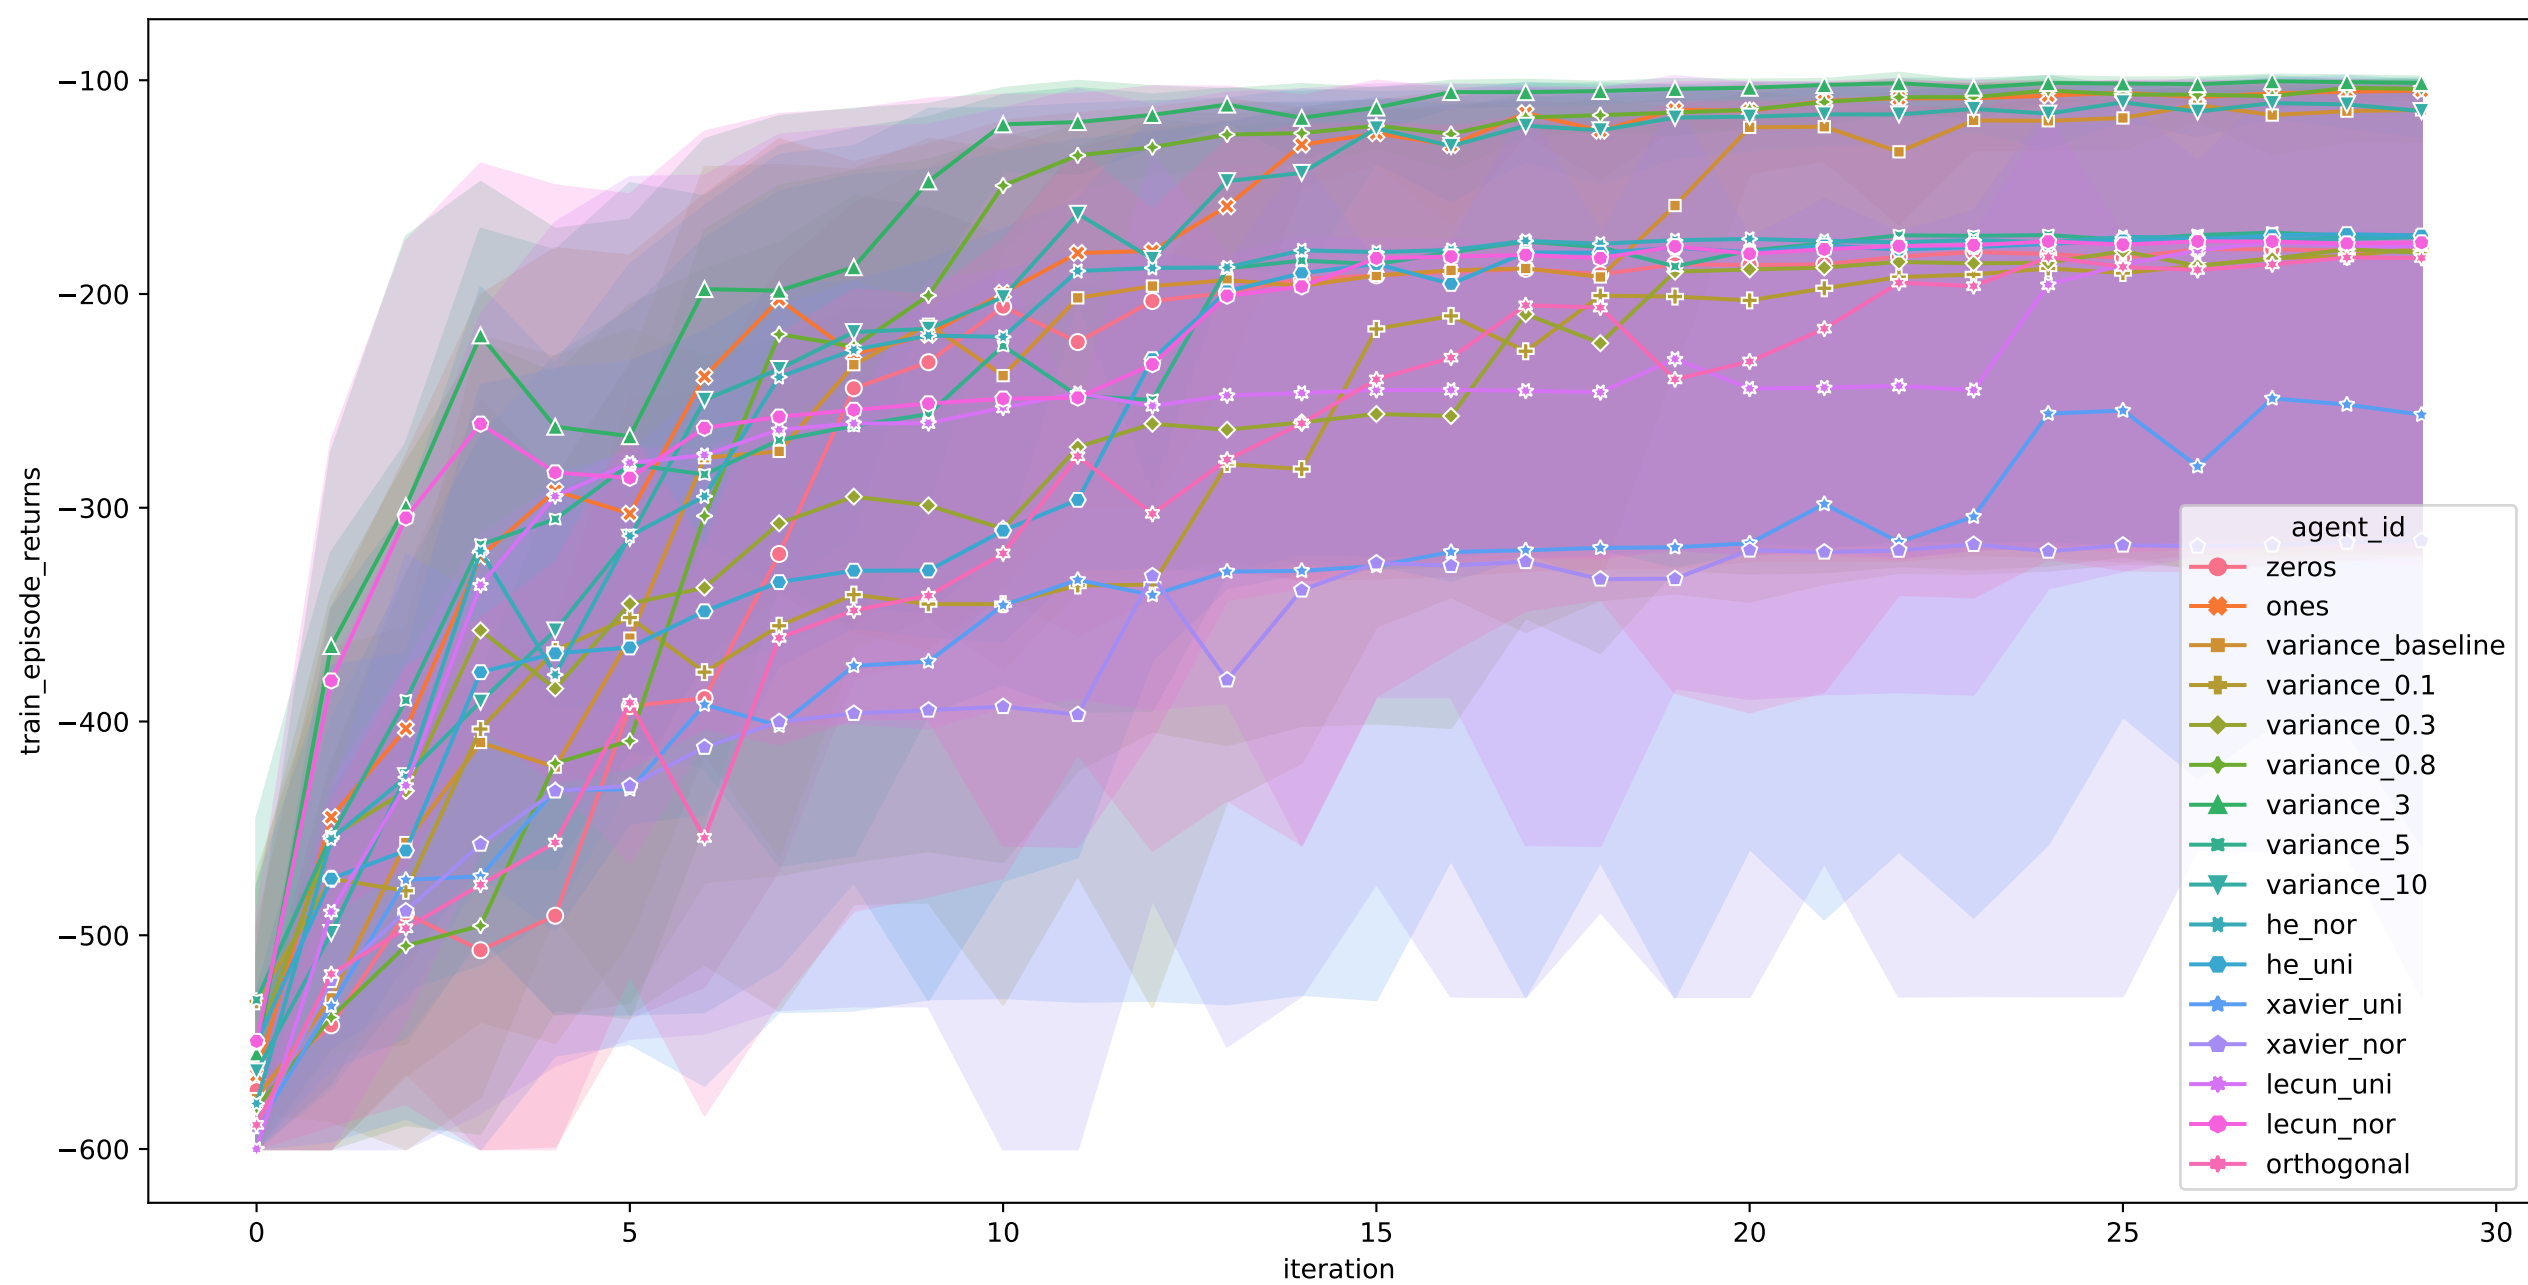

Supplement: supplementary_material [file attachment]

Acrobot

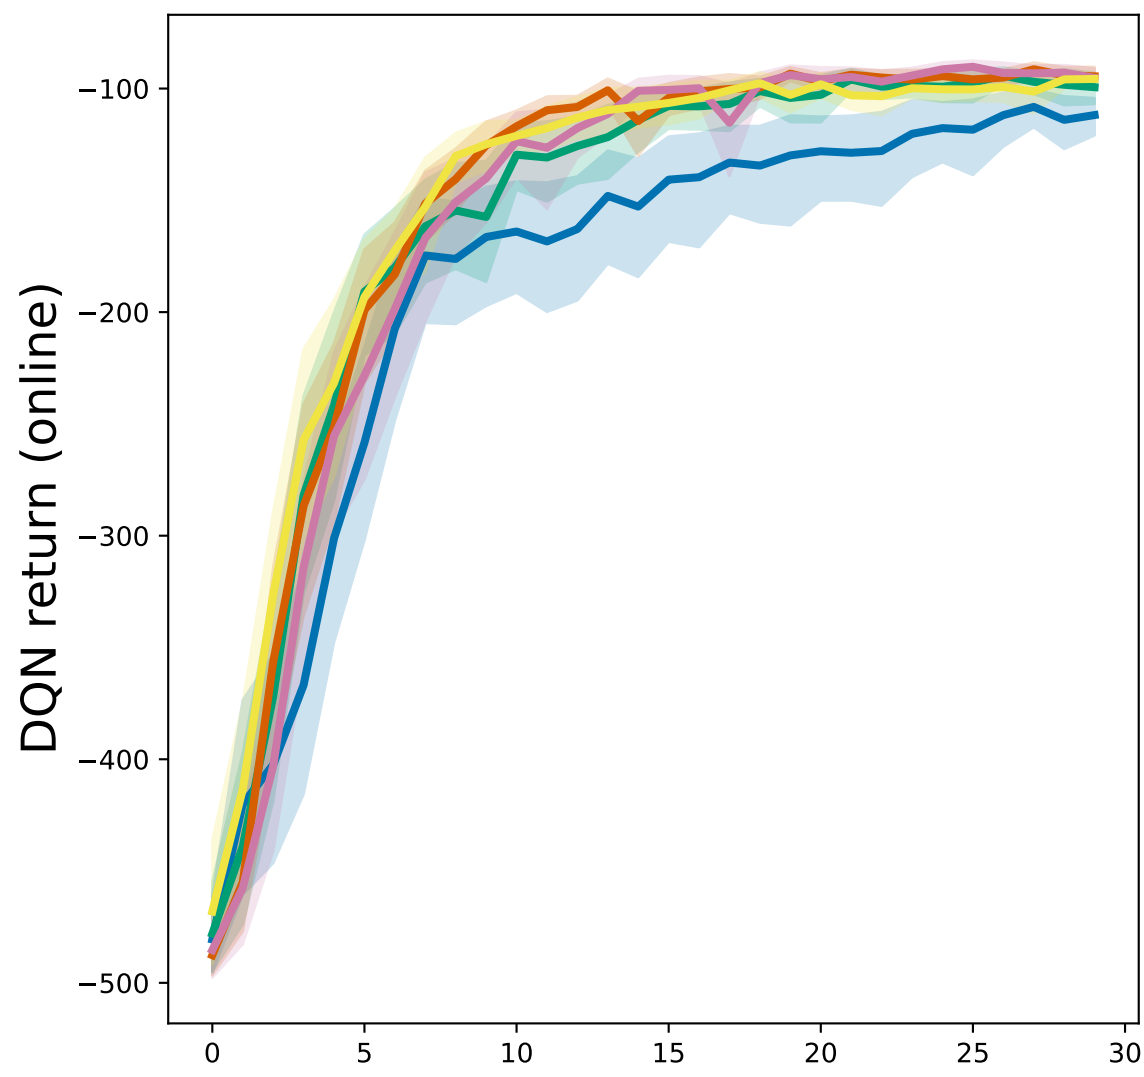

CartPole

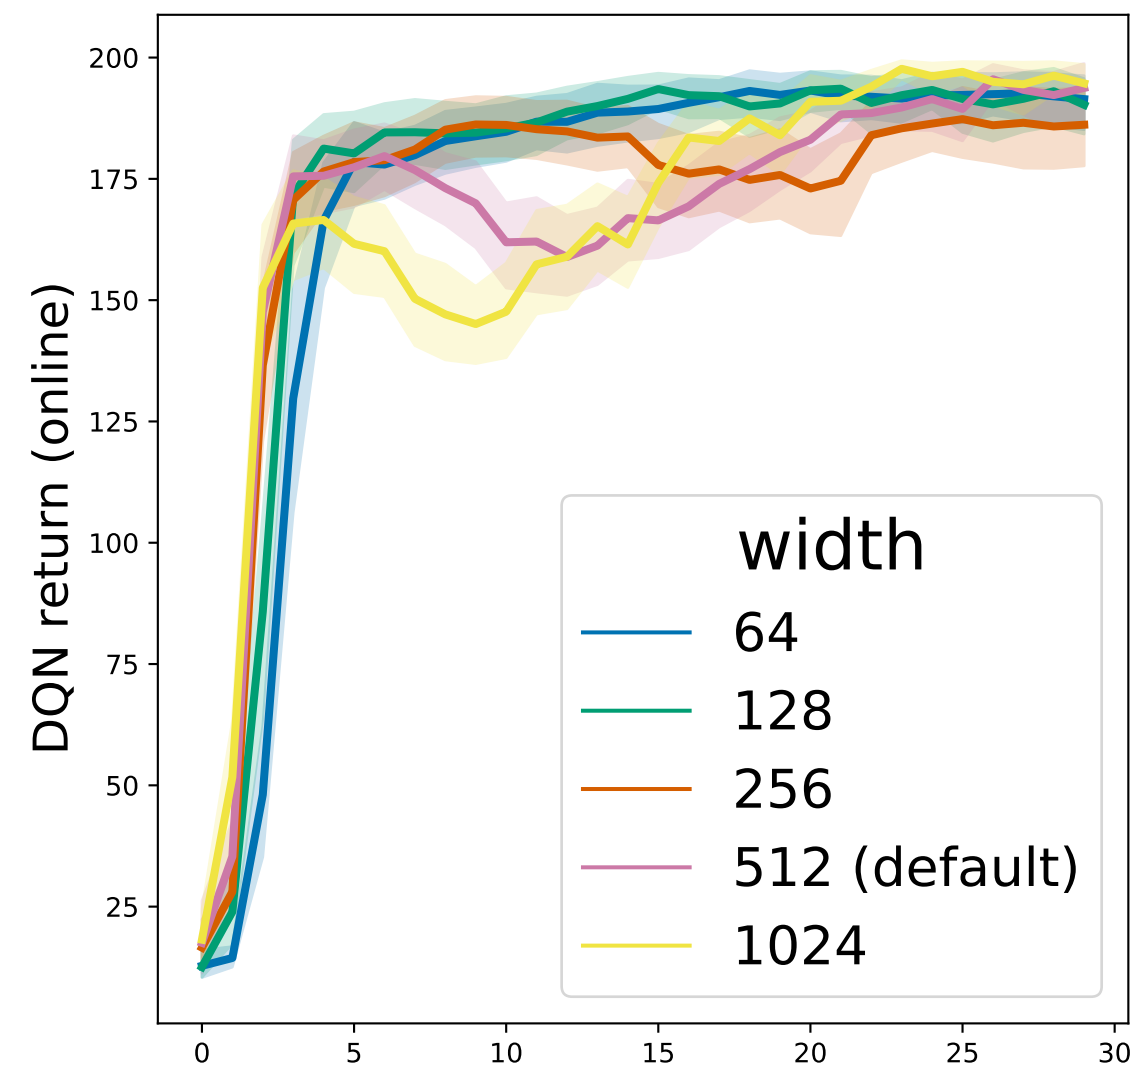

LunarLander

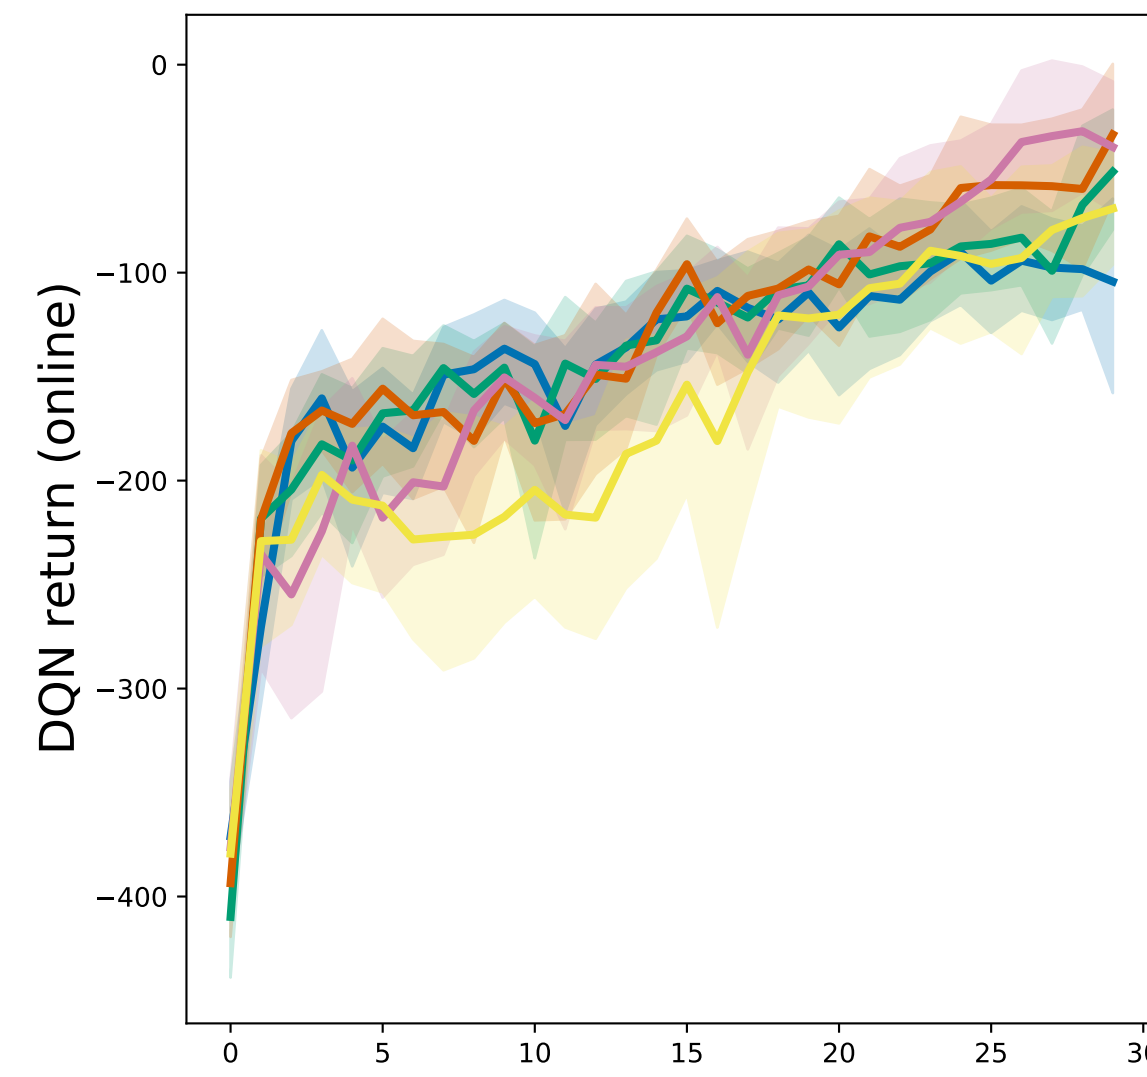

MountainCar

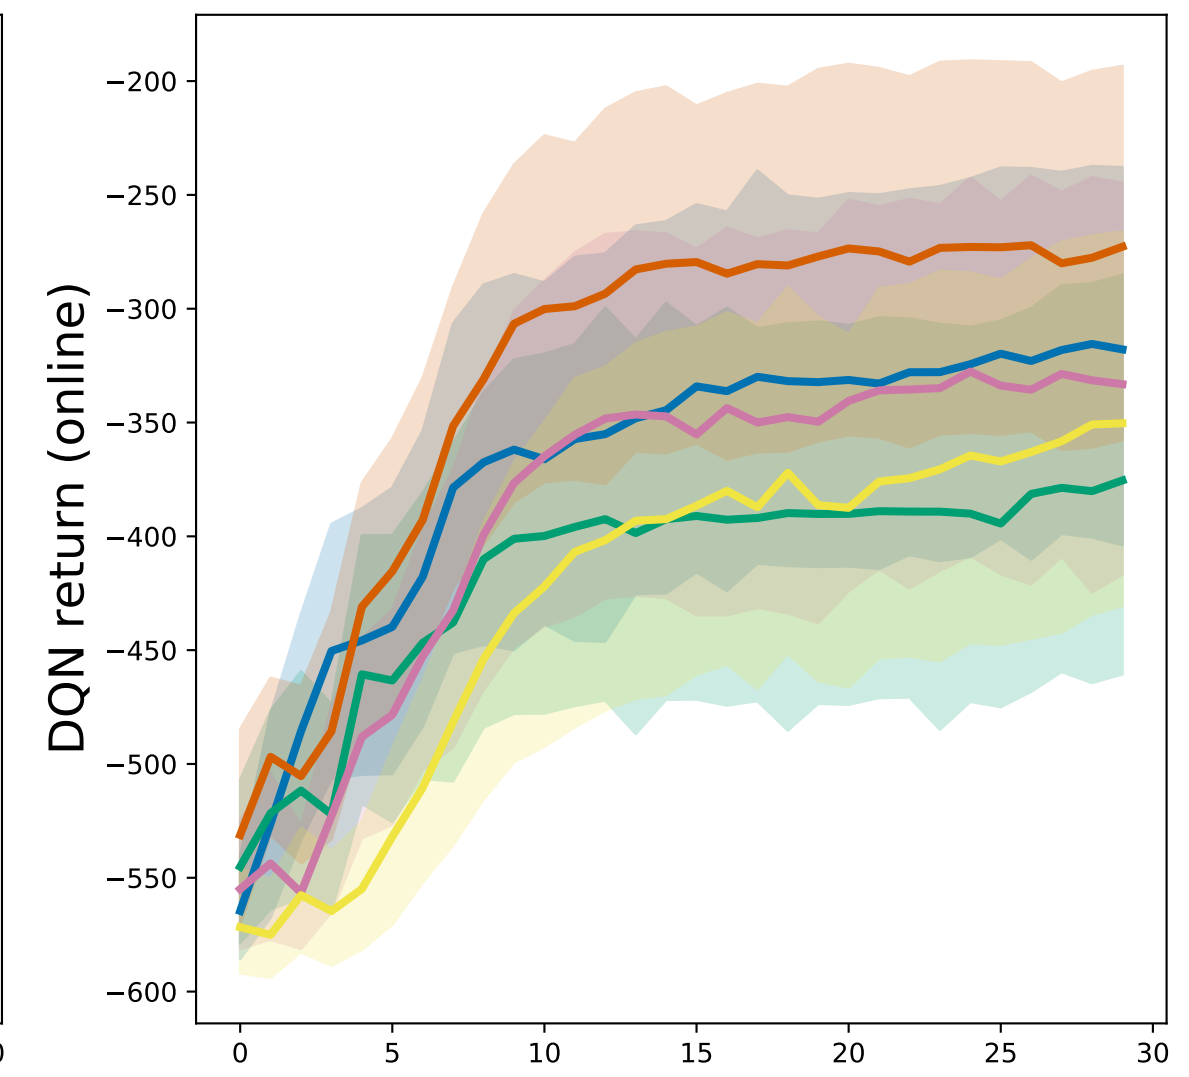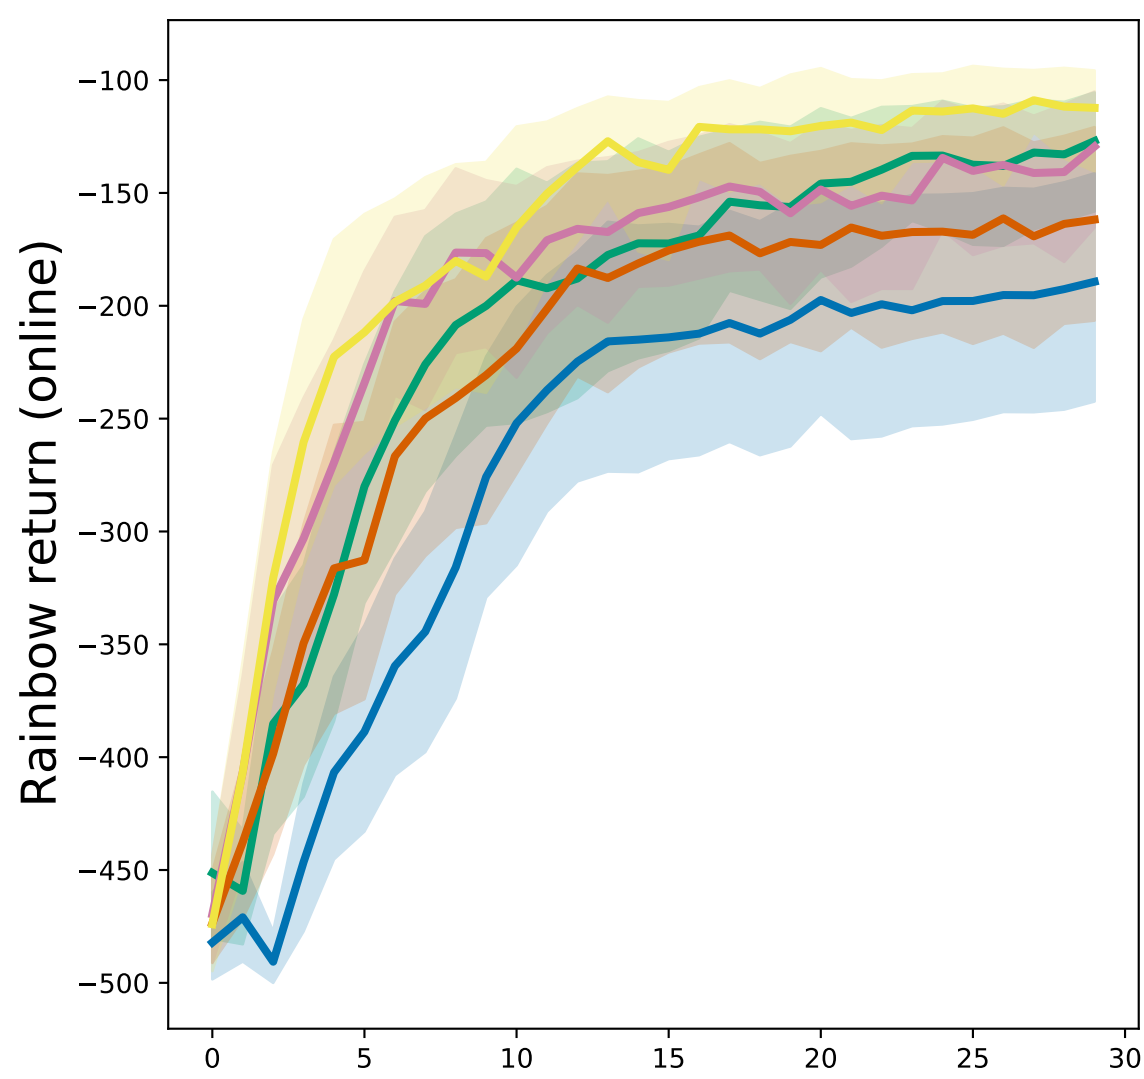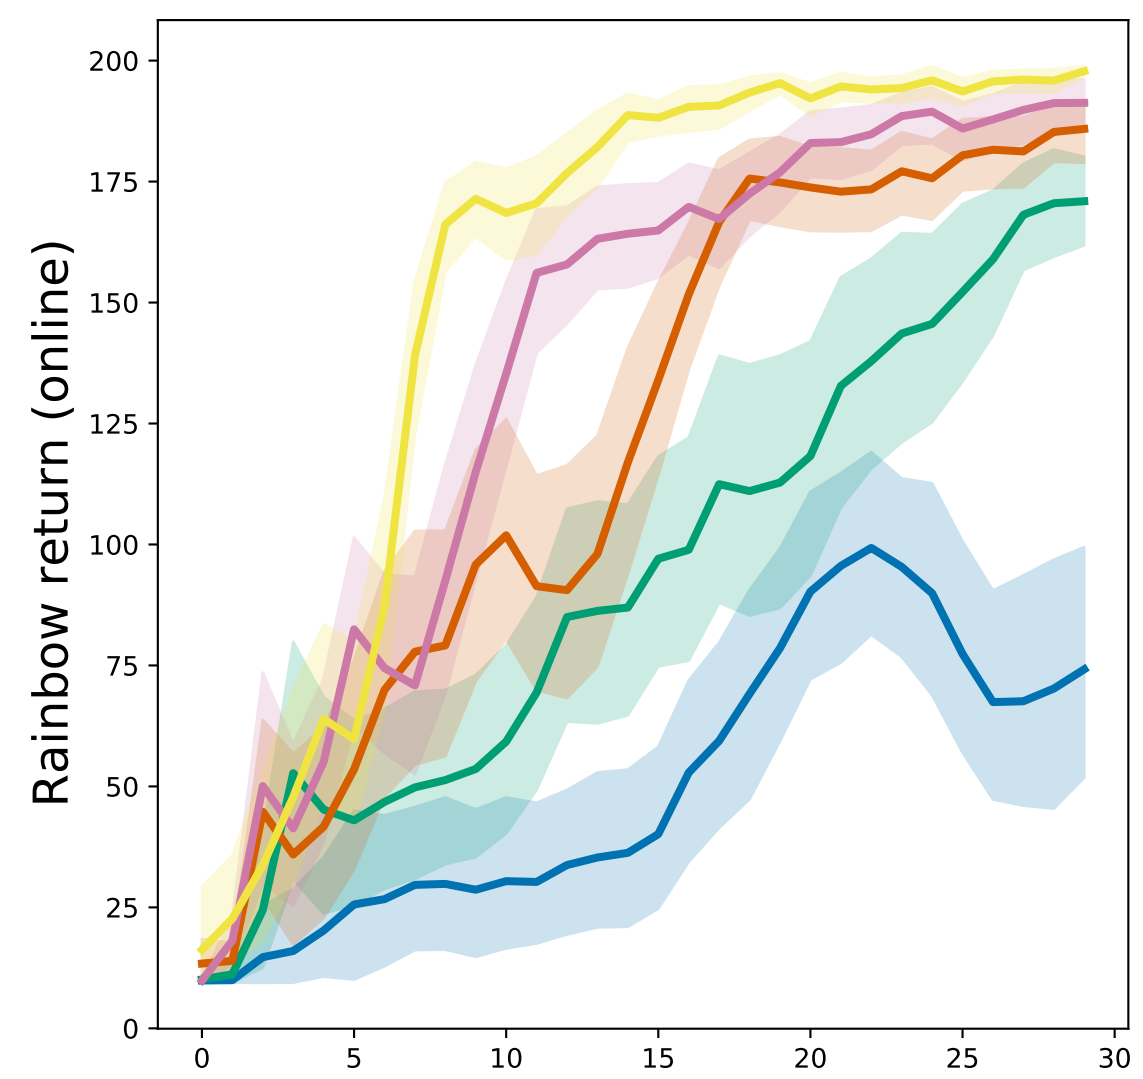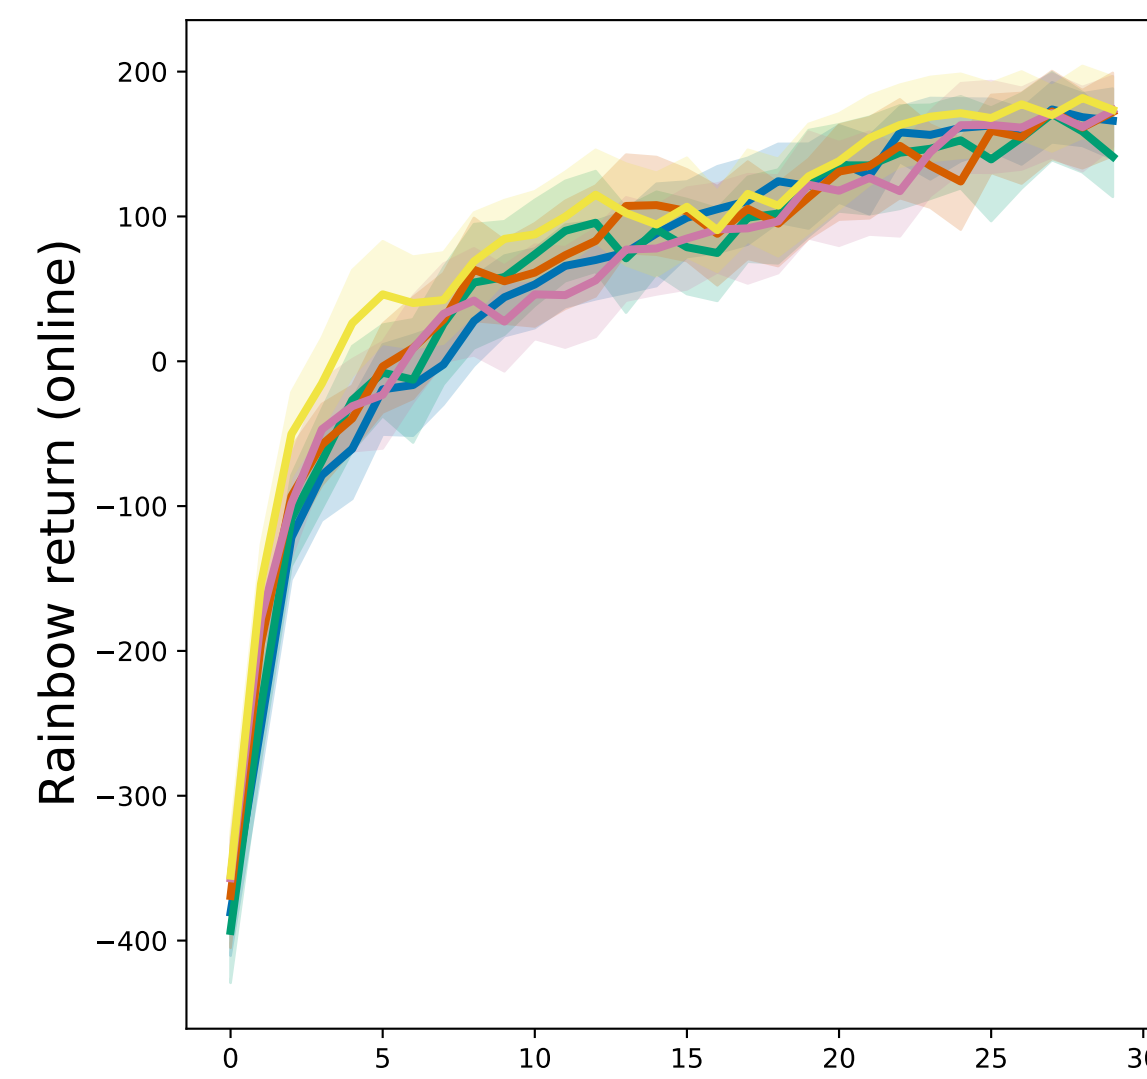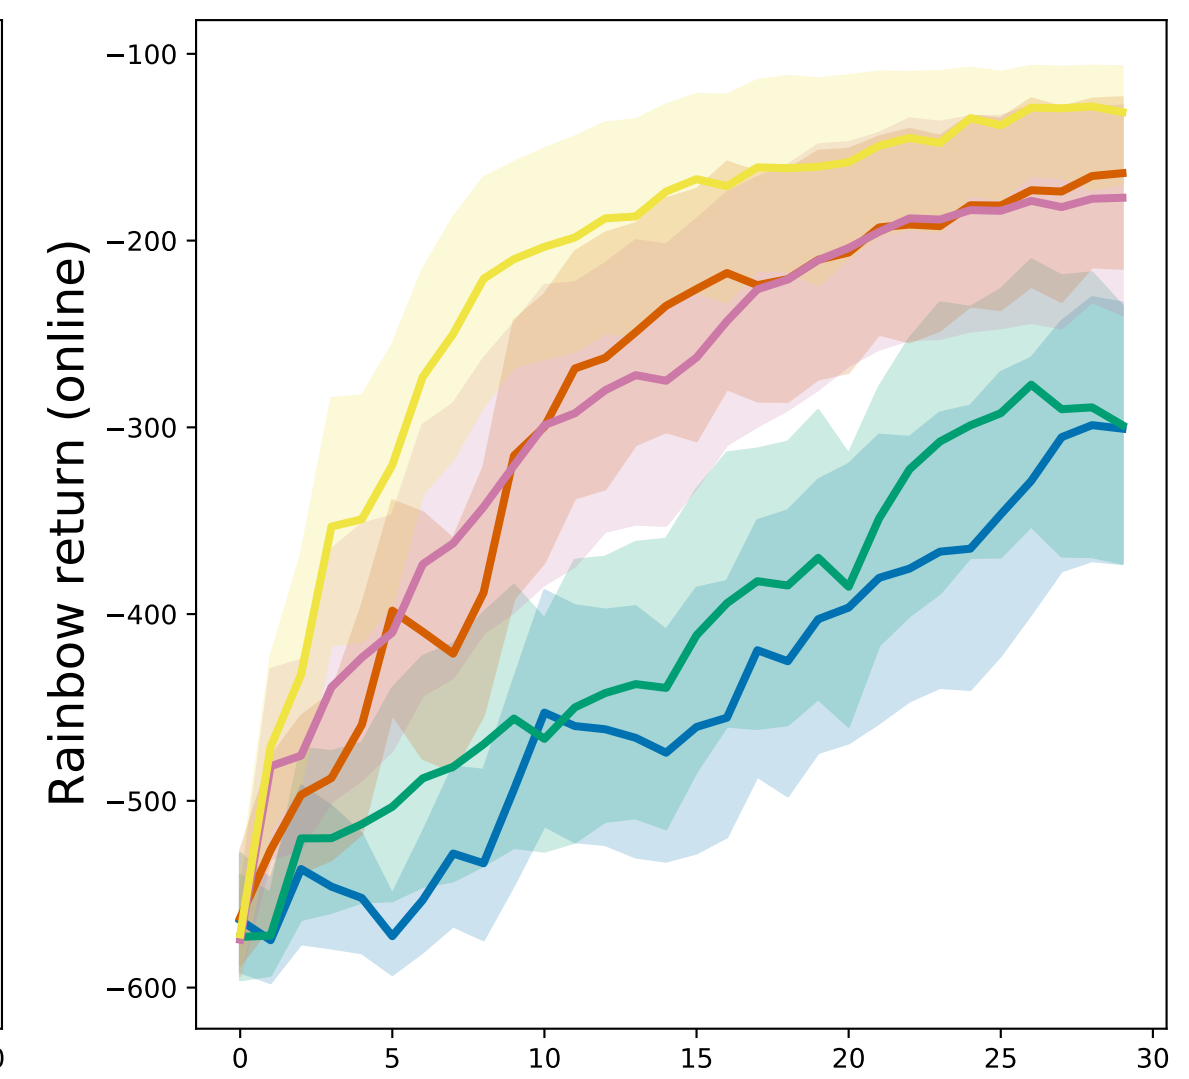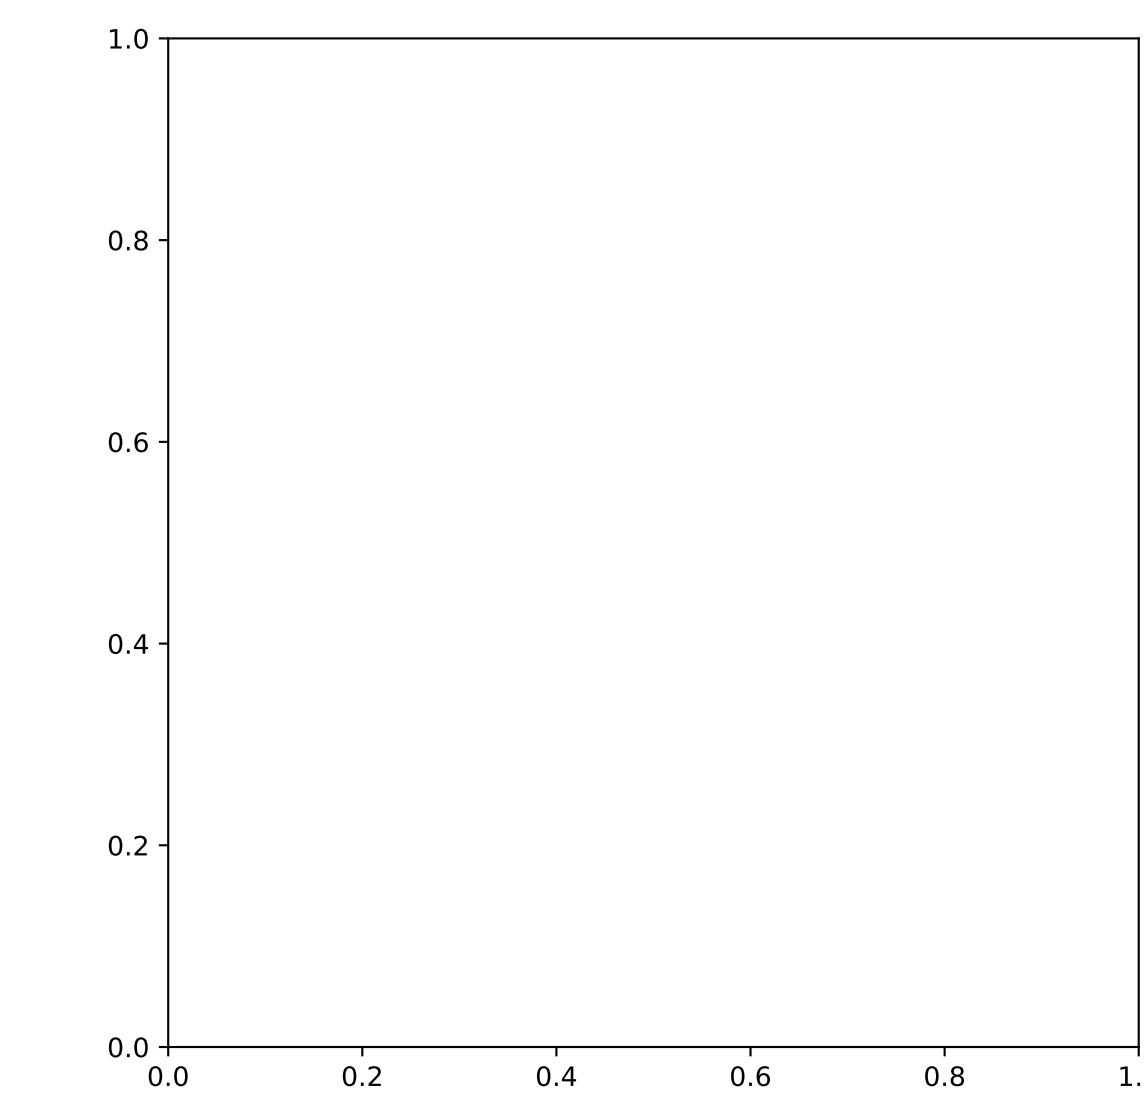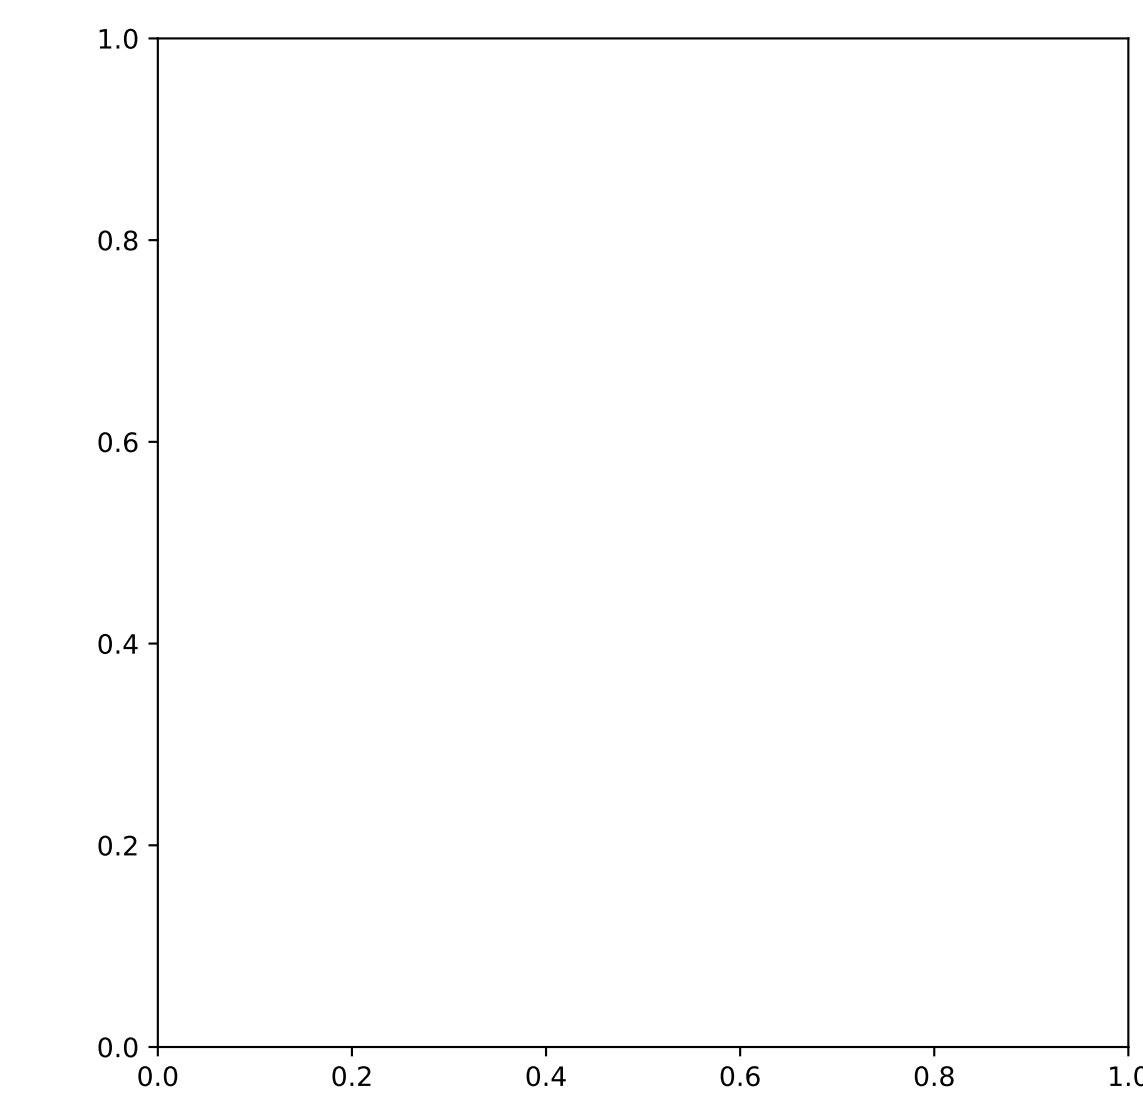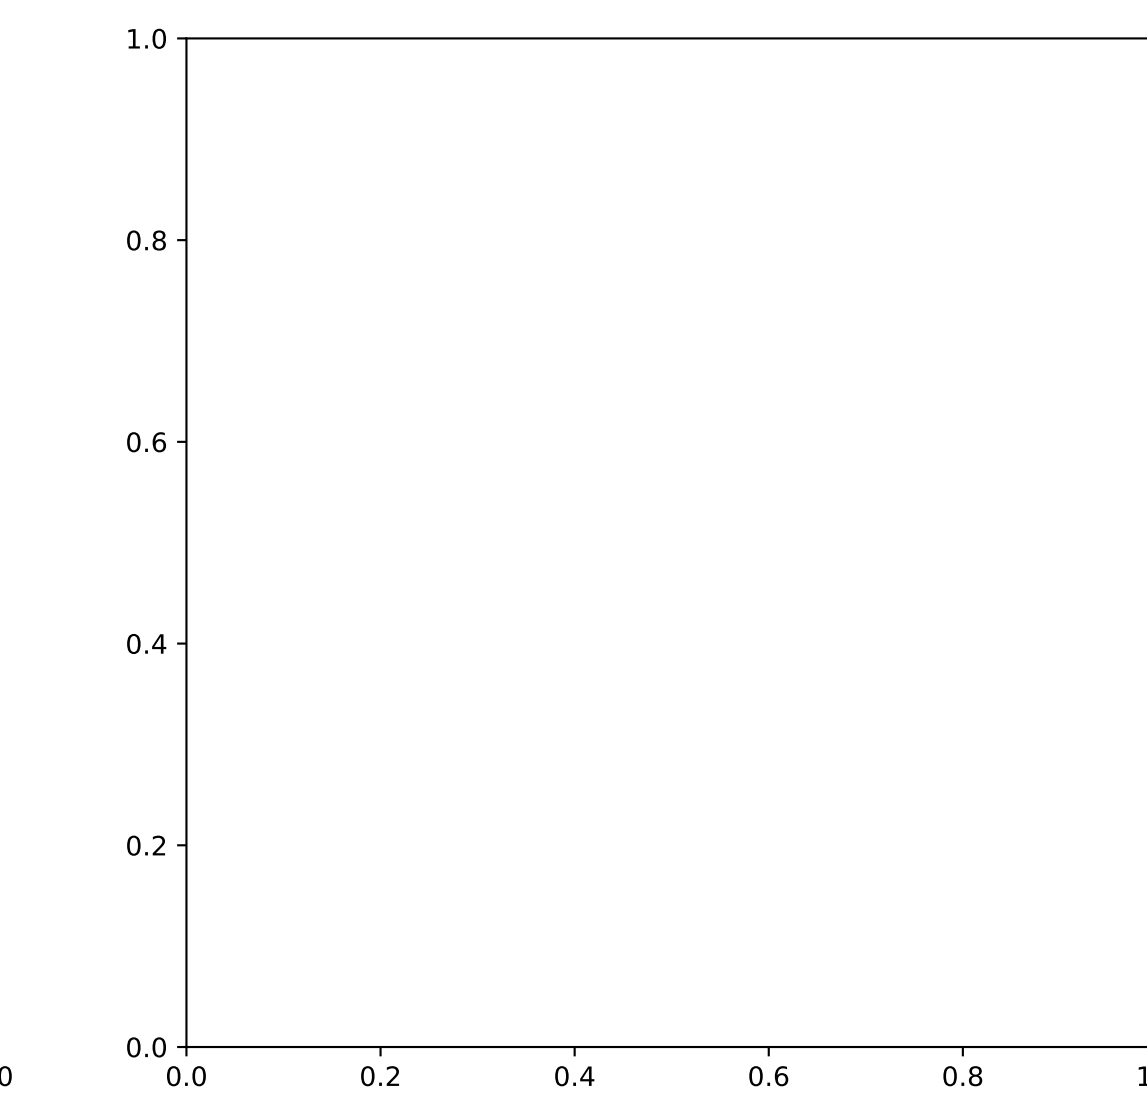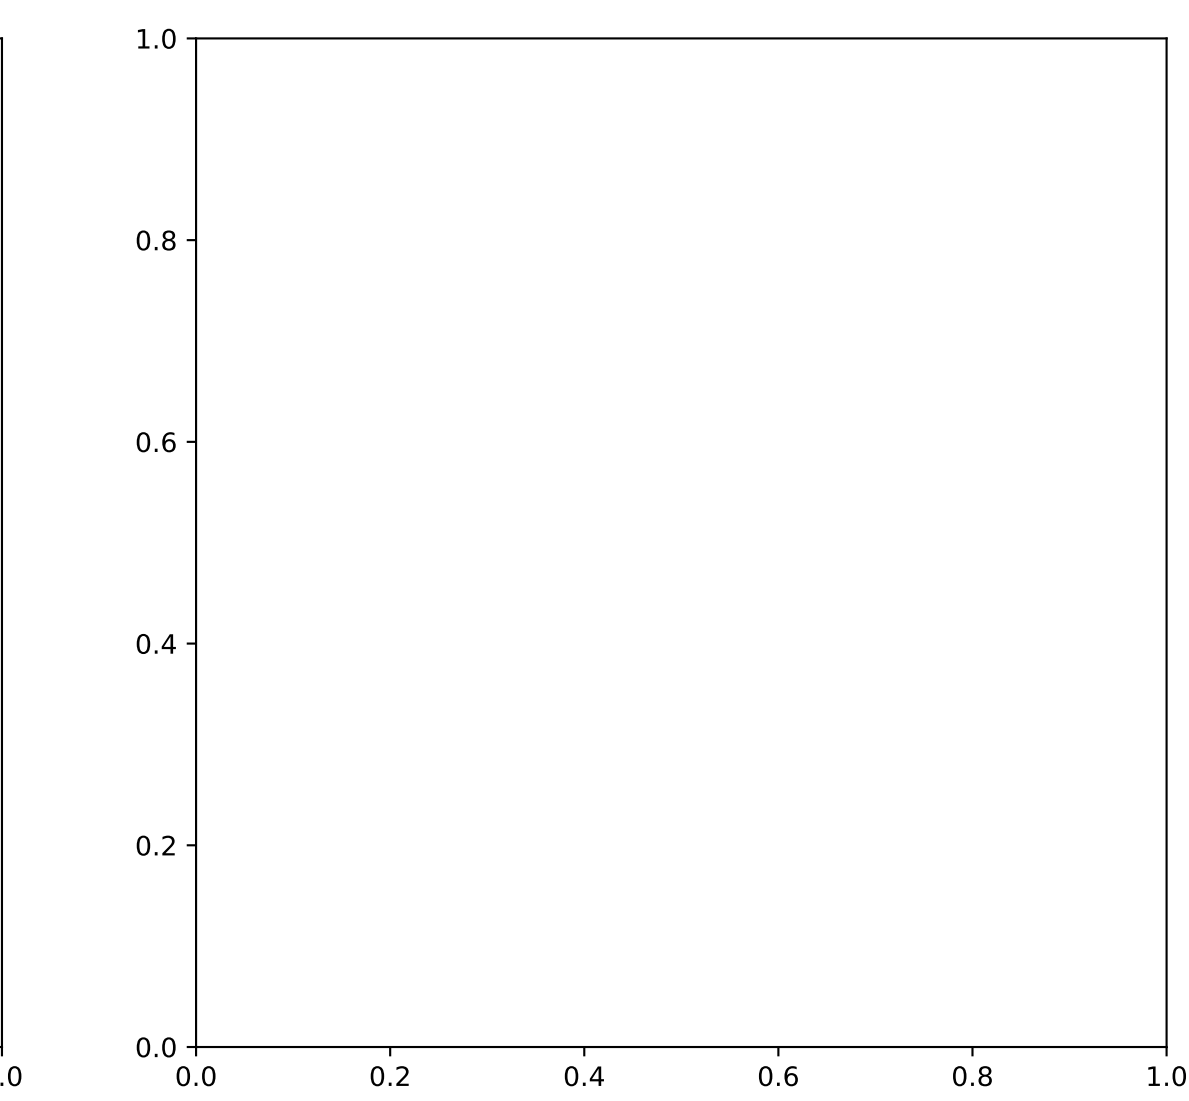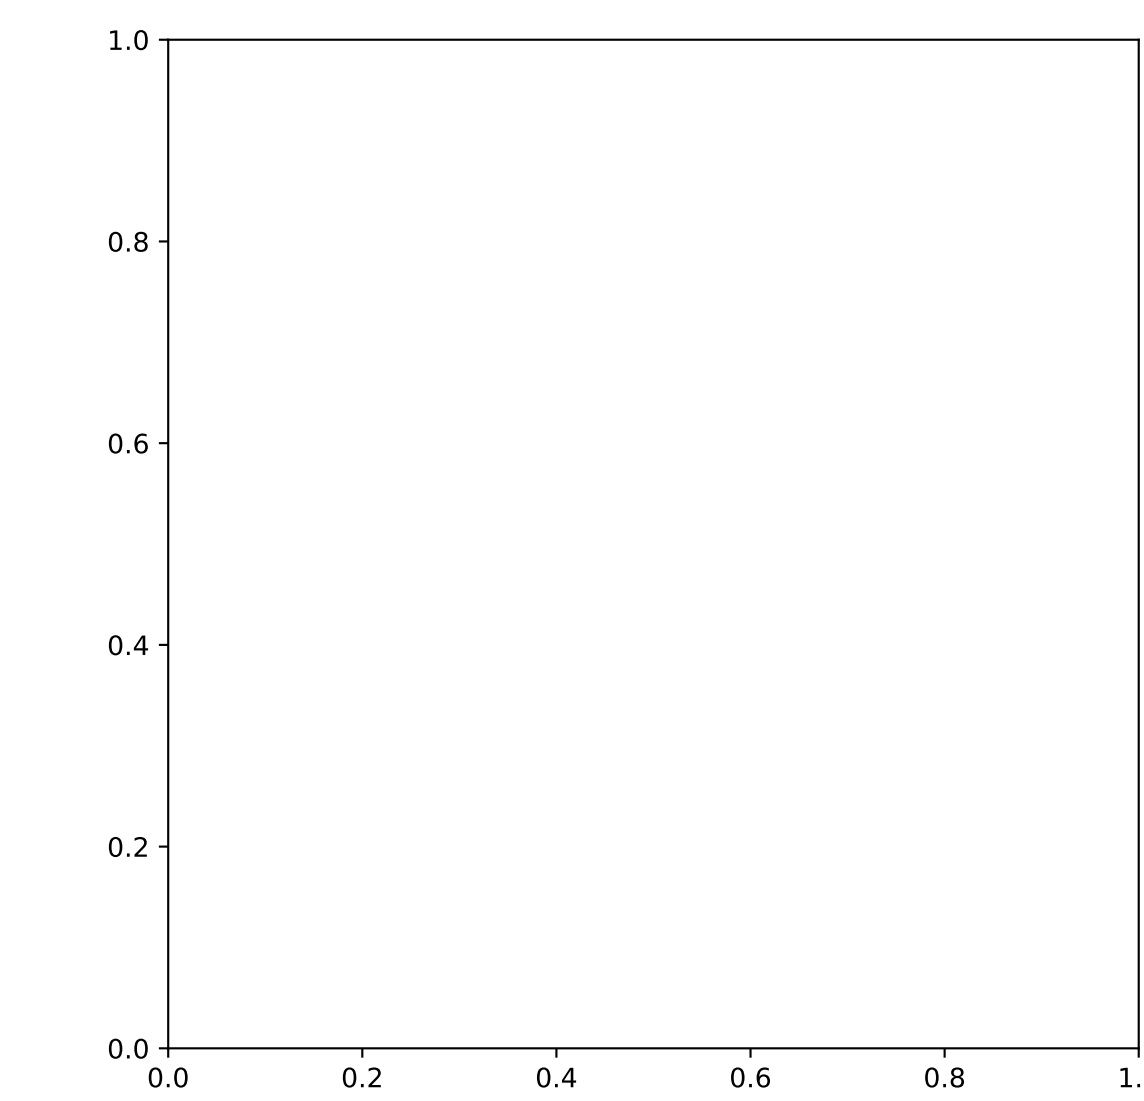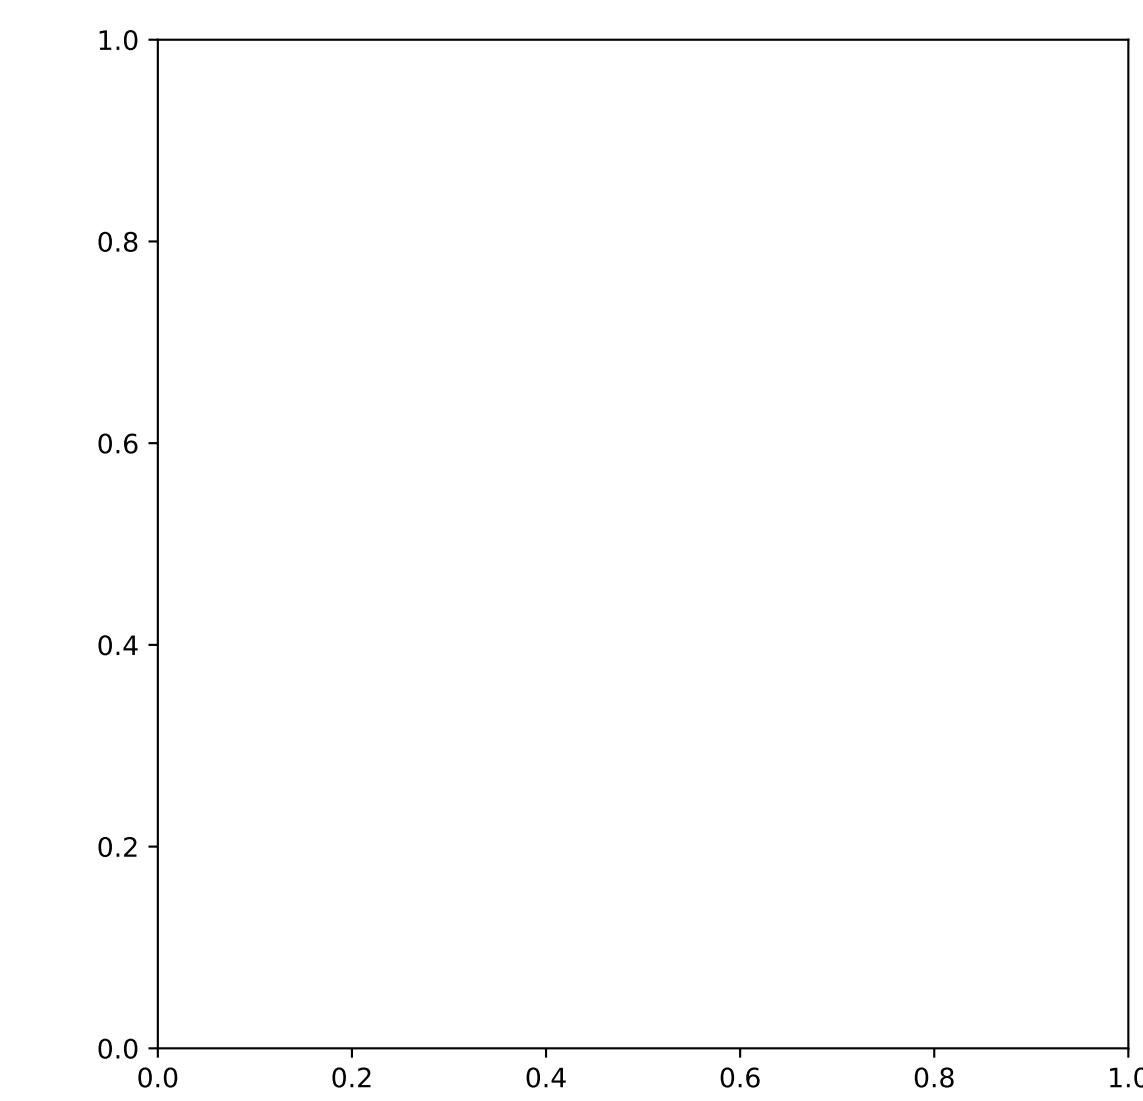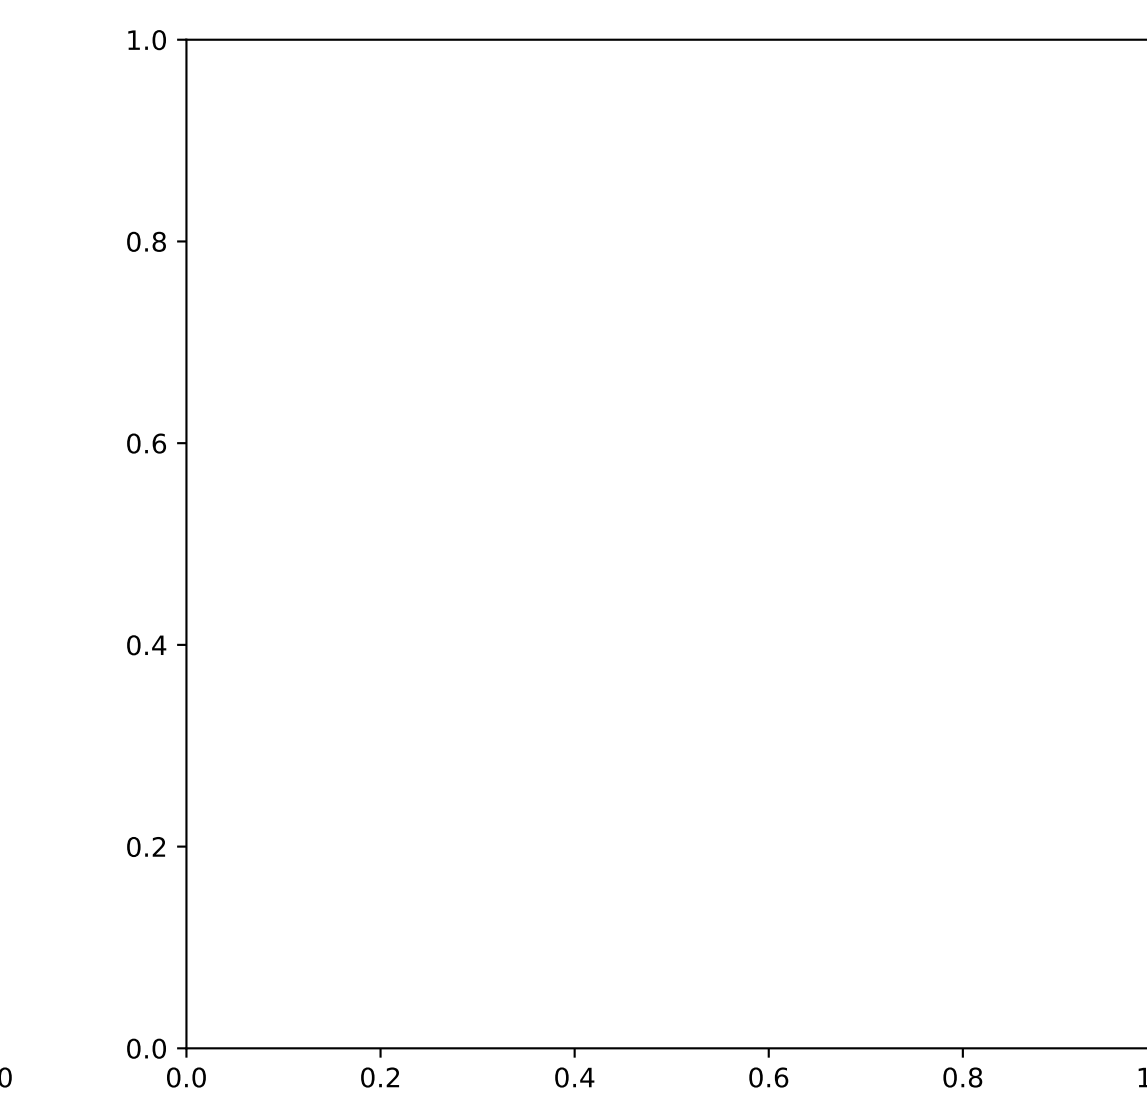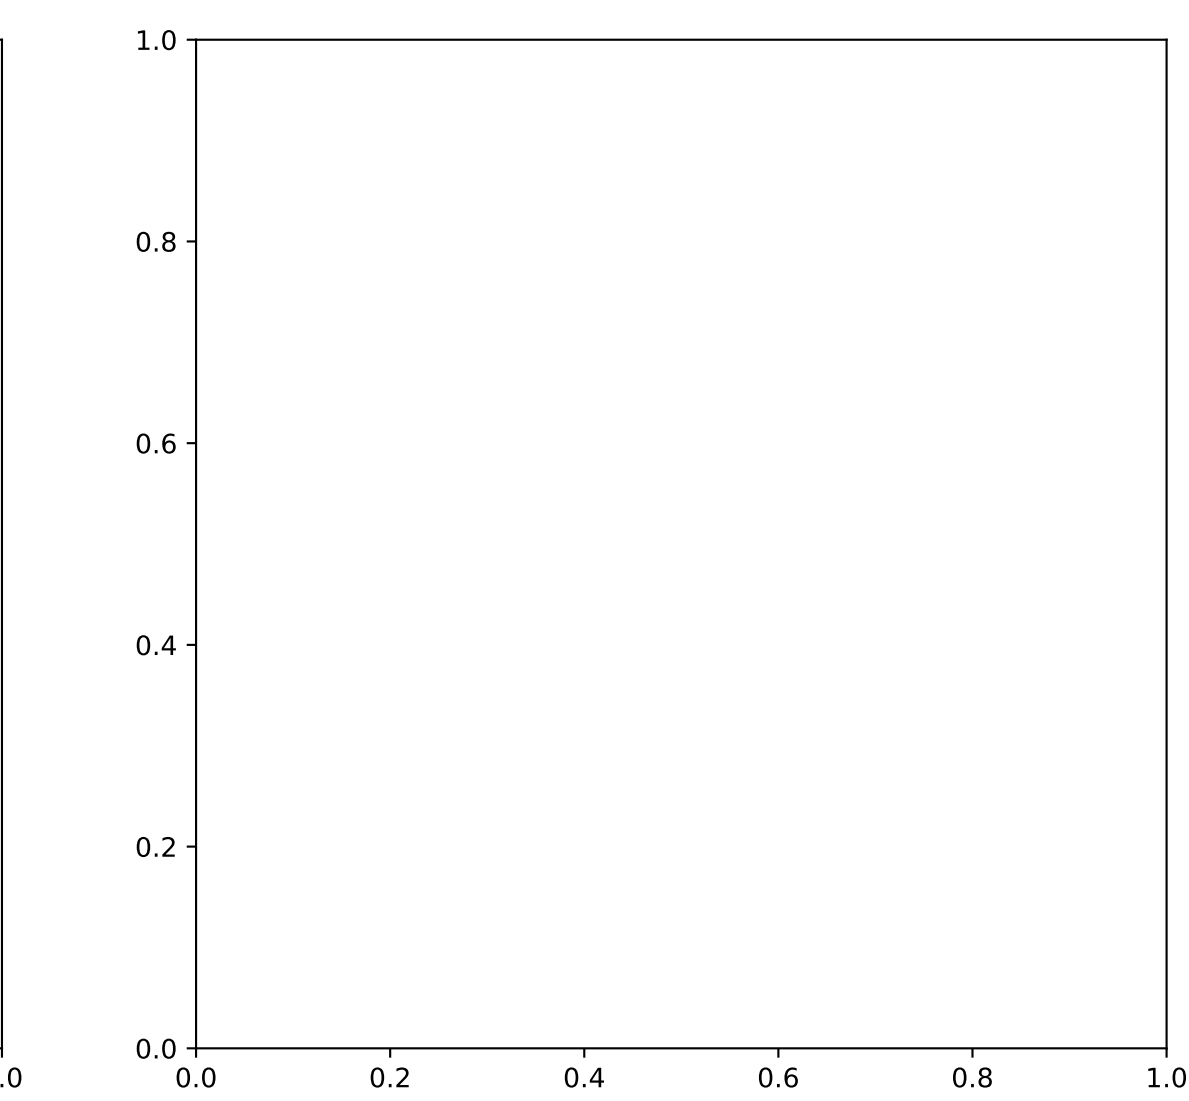

Supplement: supplementary_material [file attachment]

Acrobot

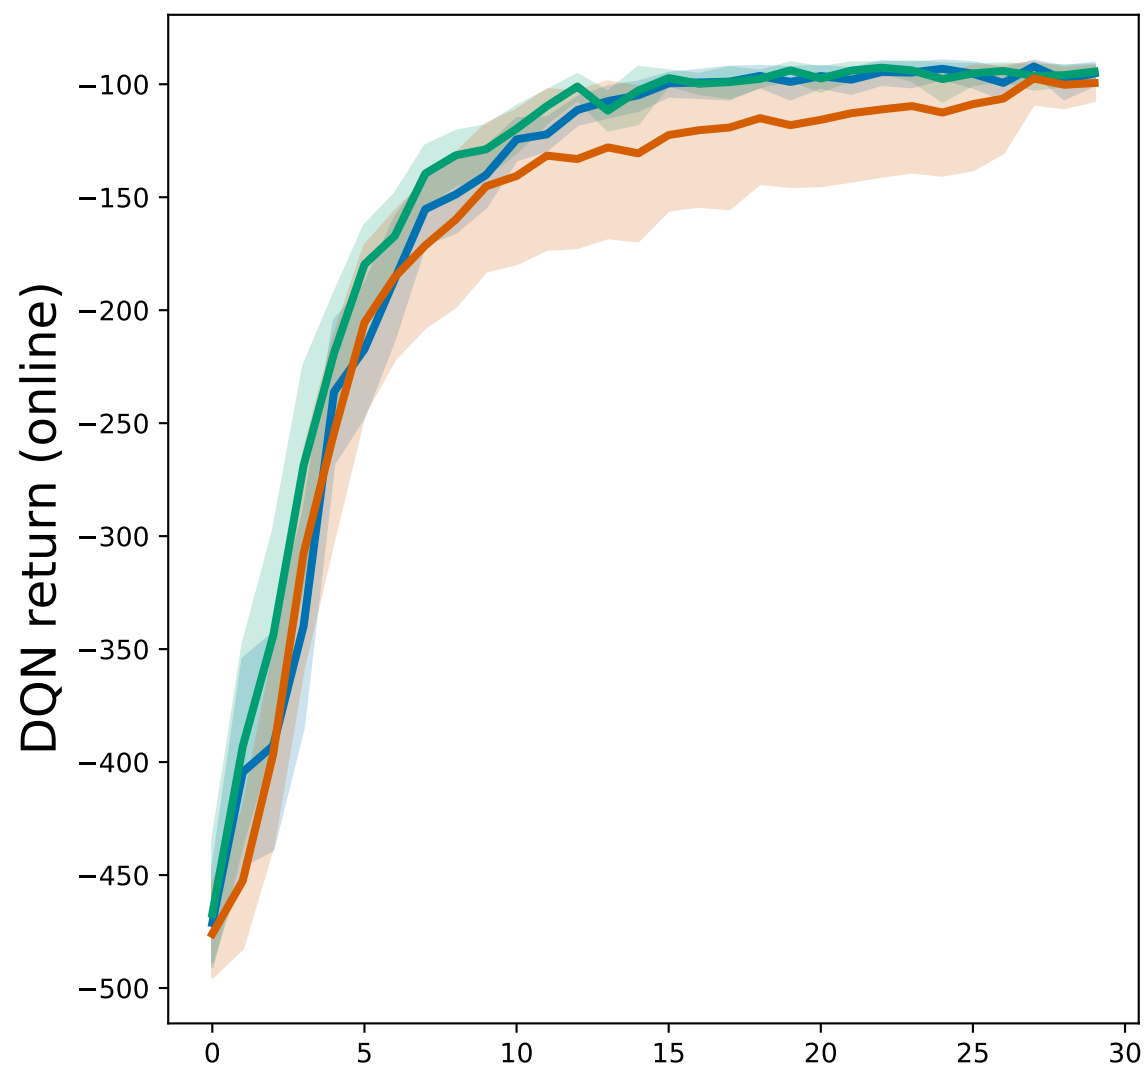

CartPole

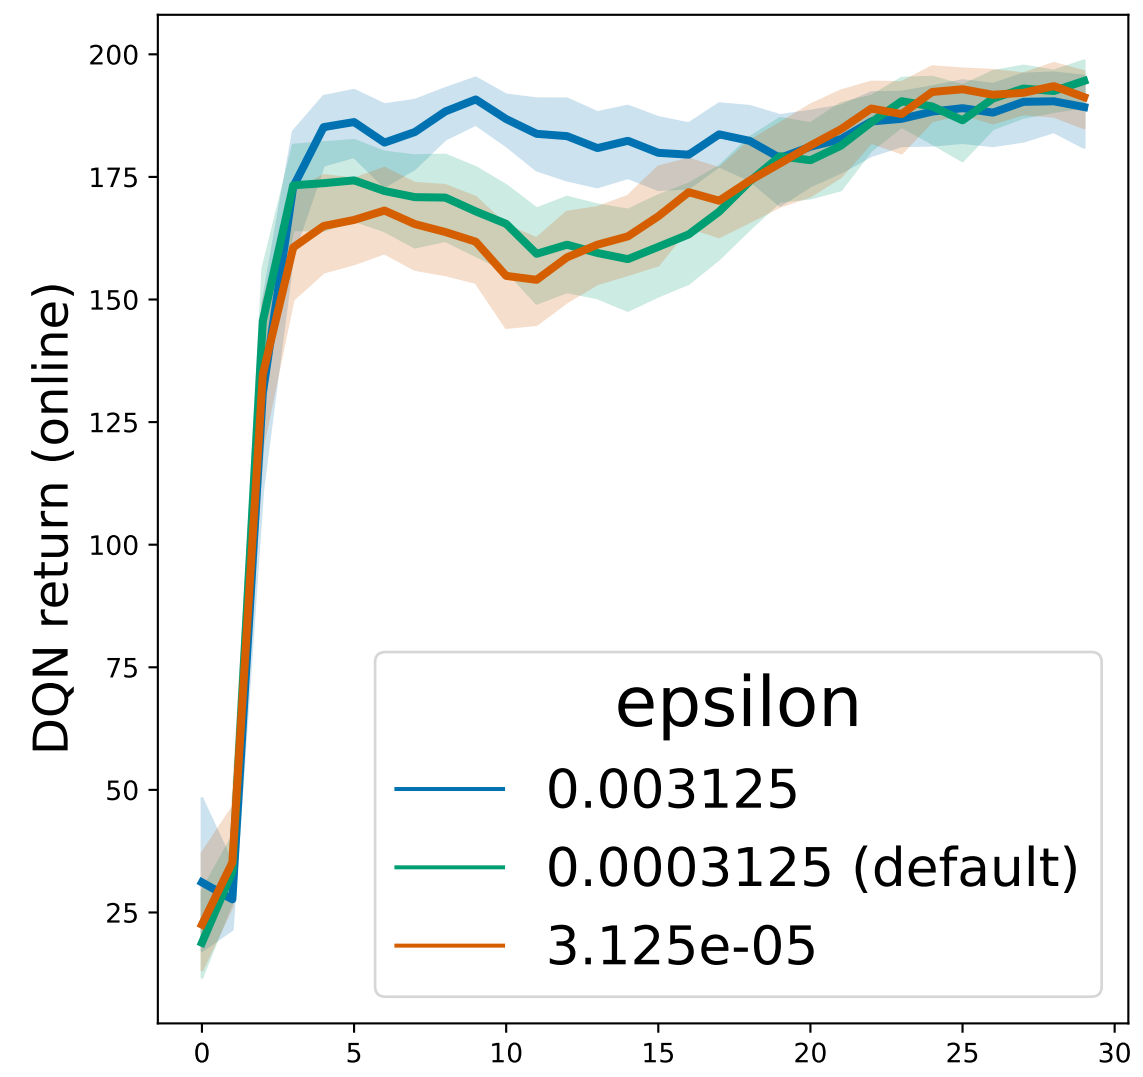

LunarLander

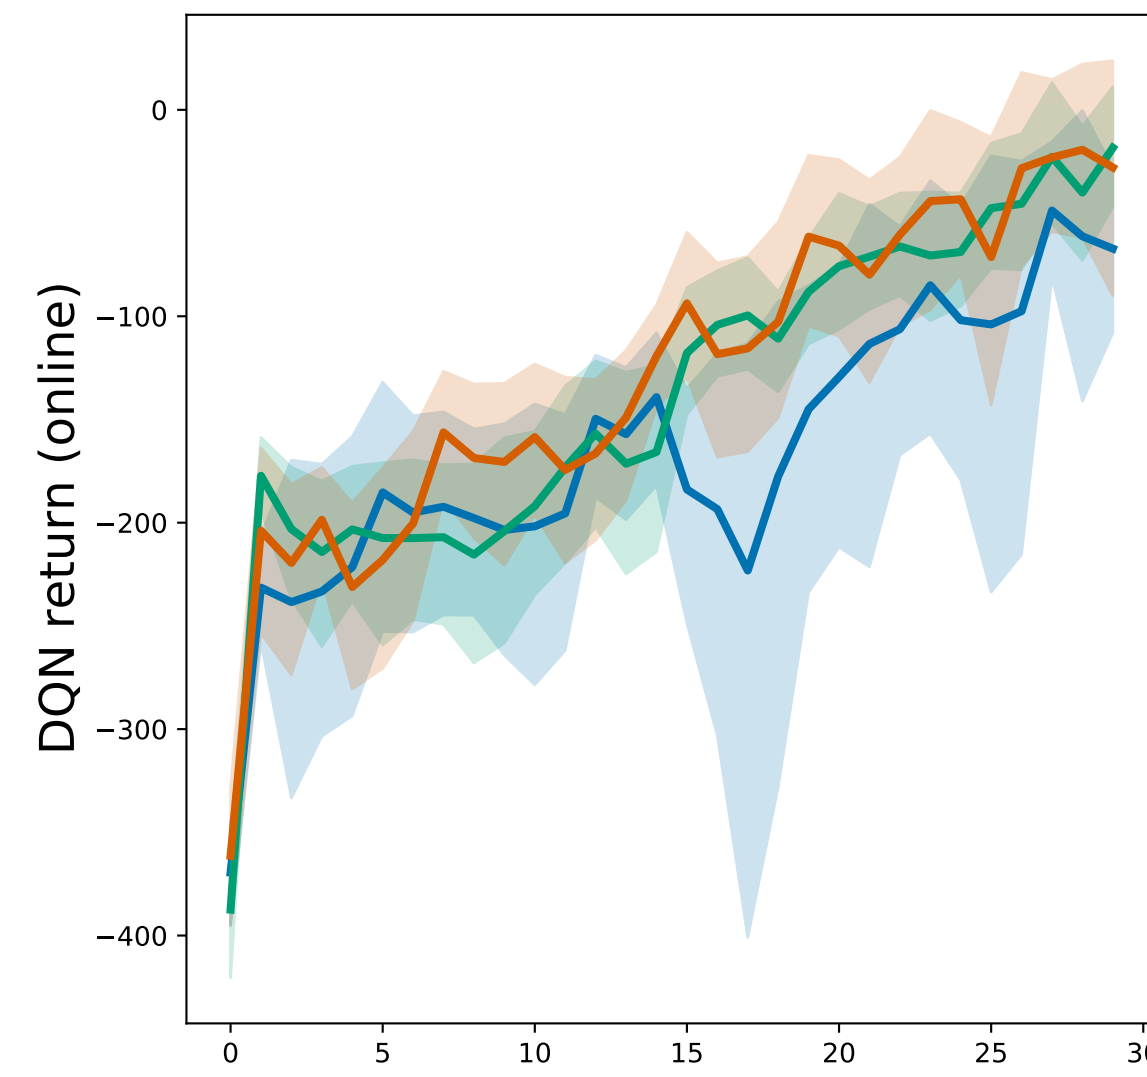

MountainCar

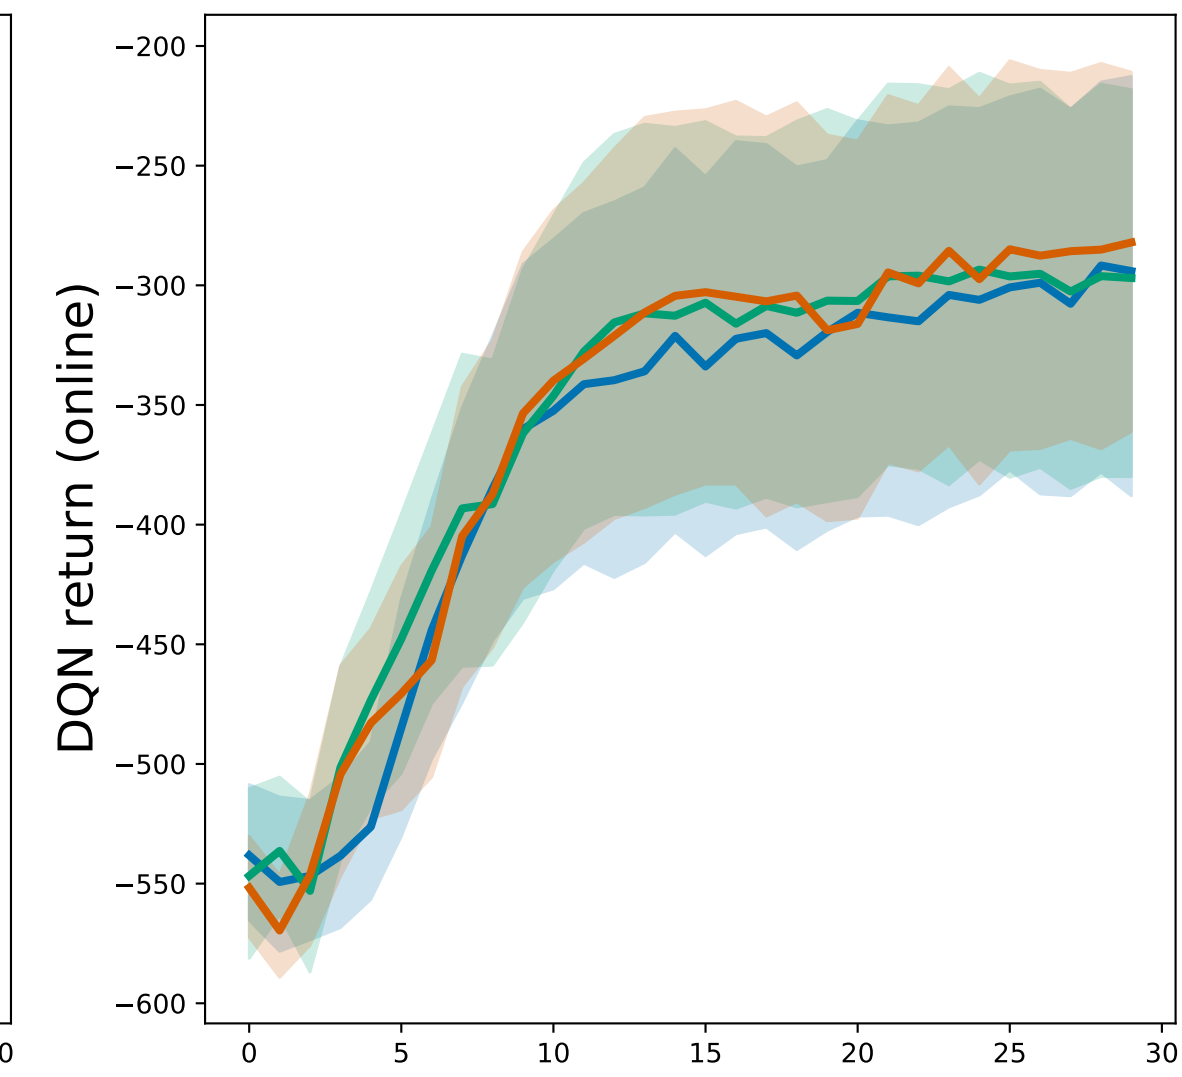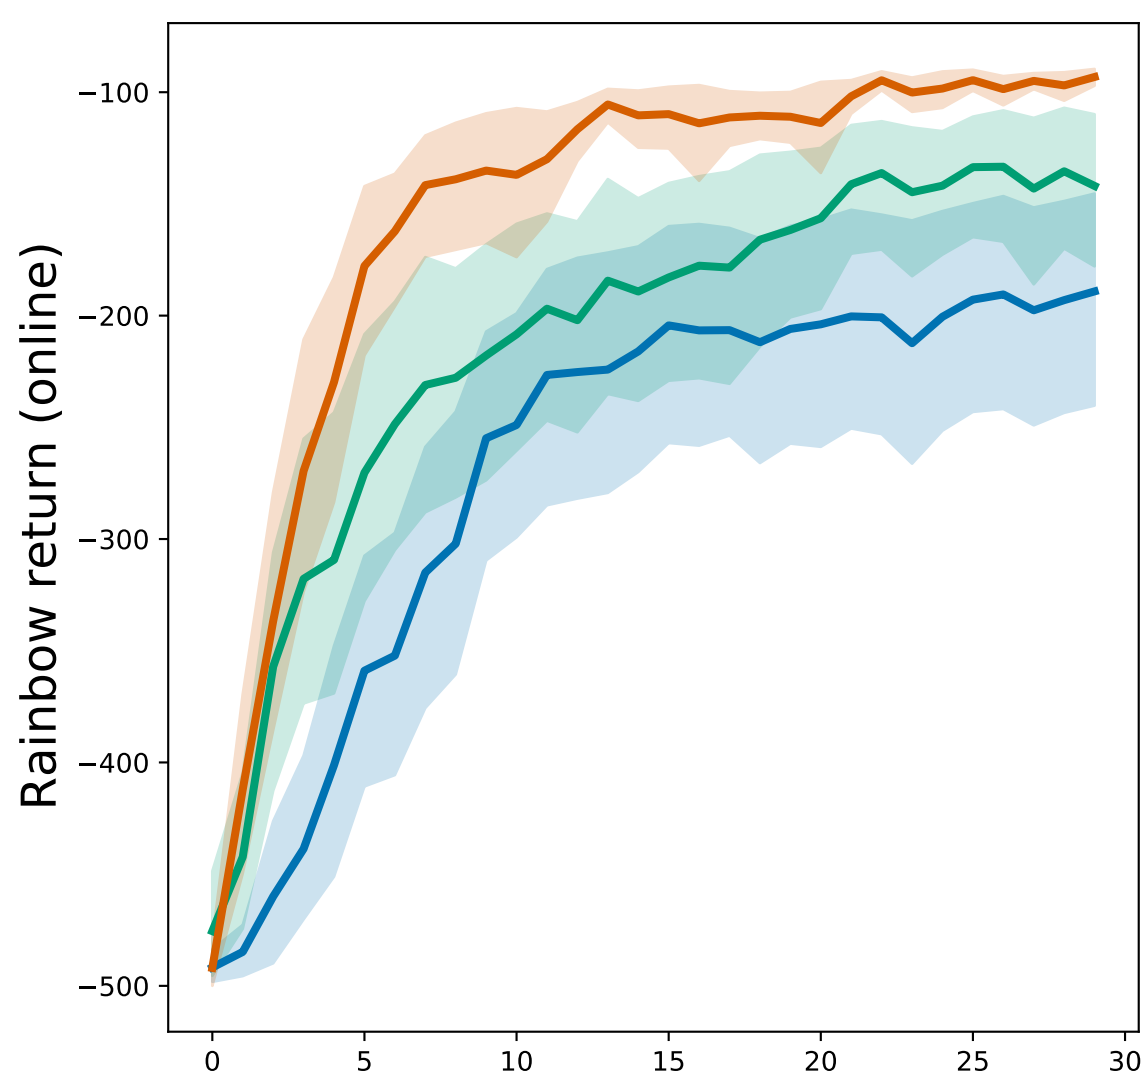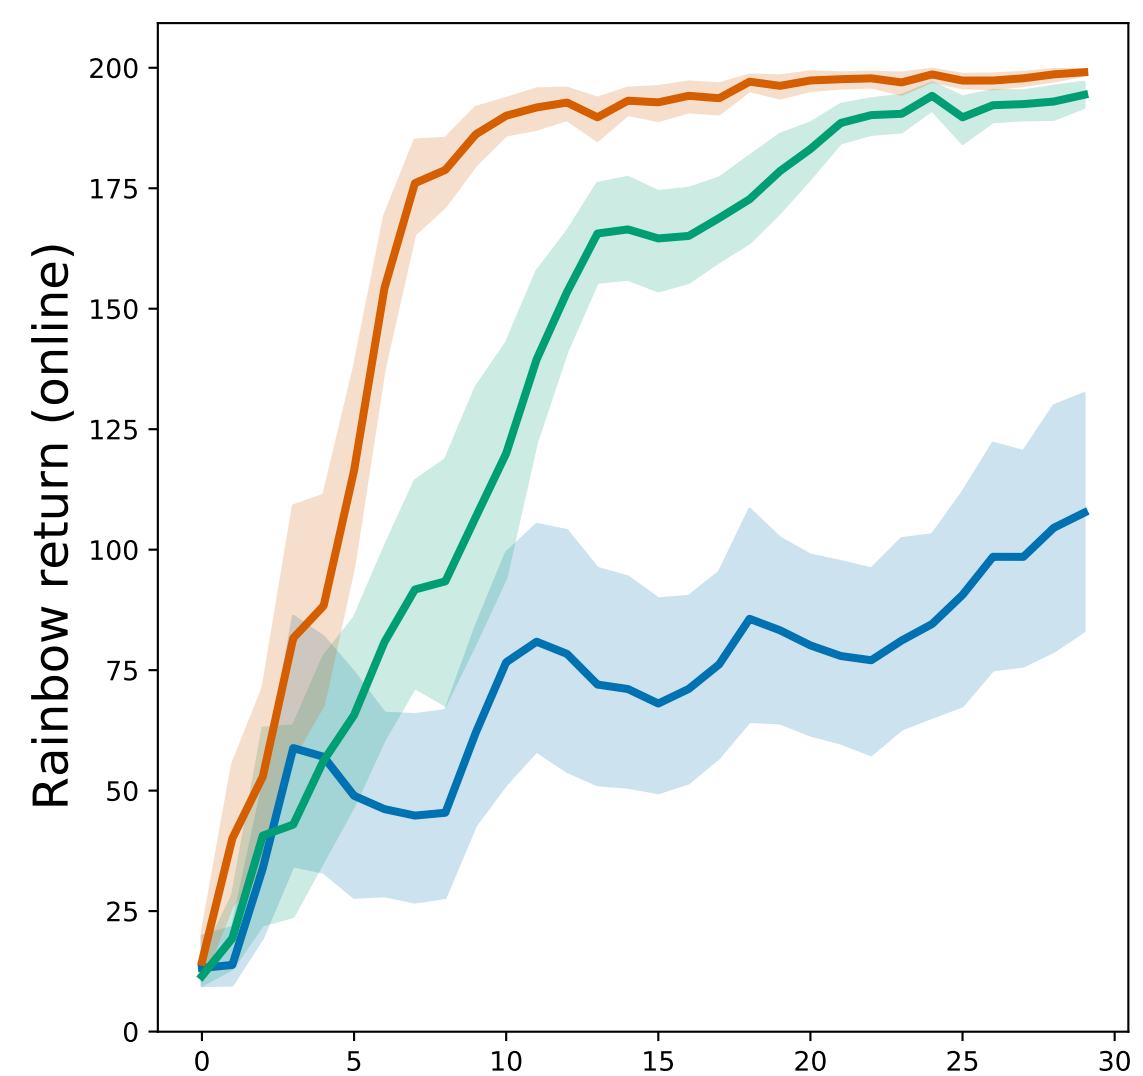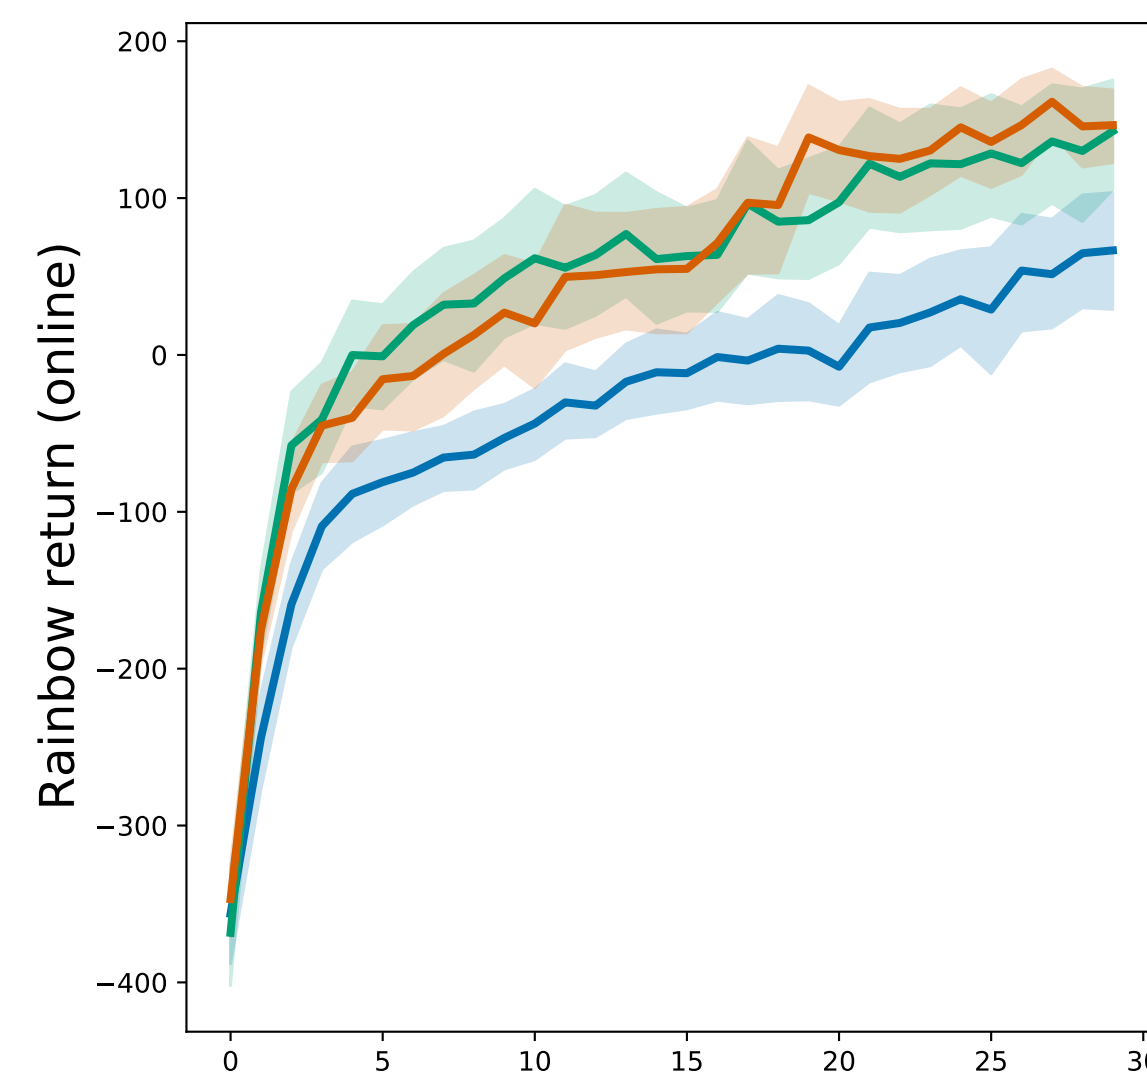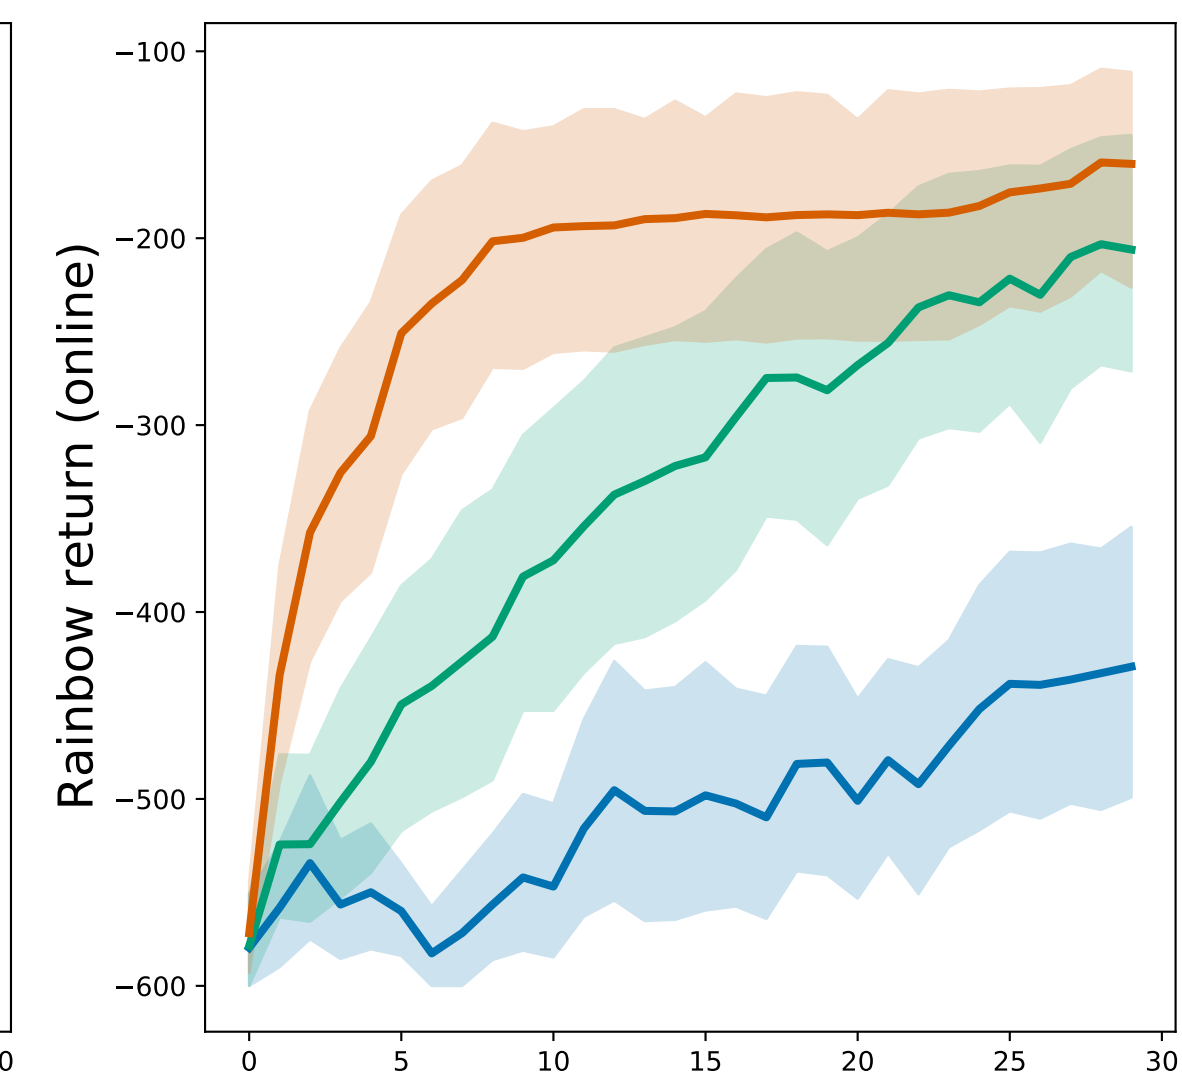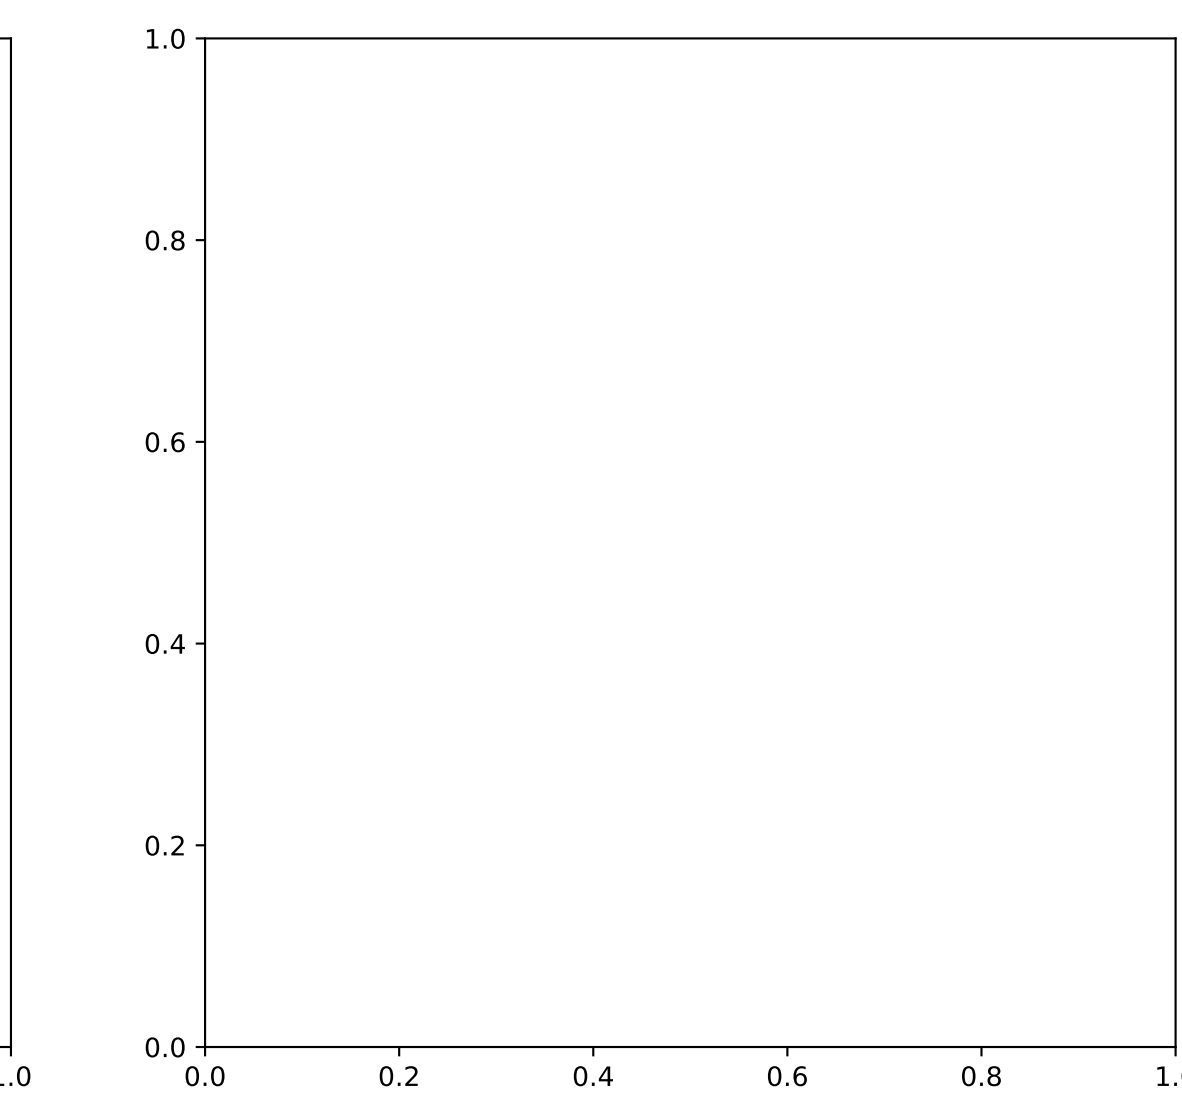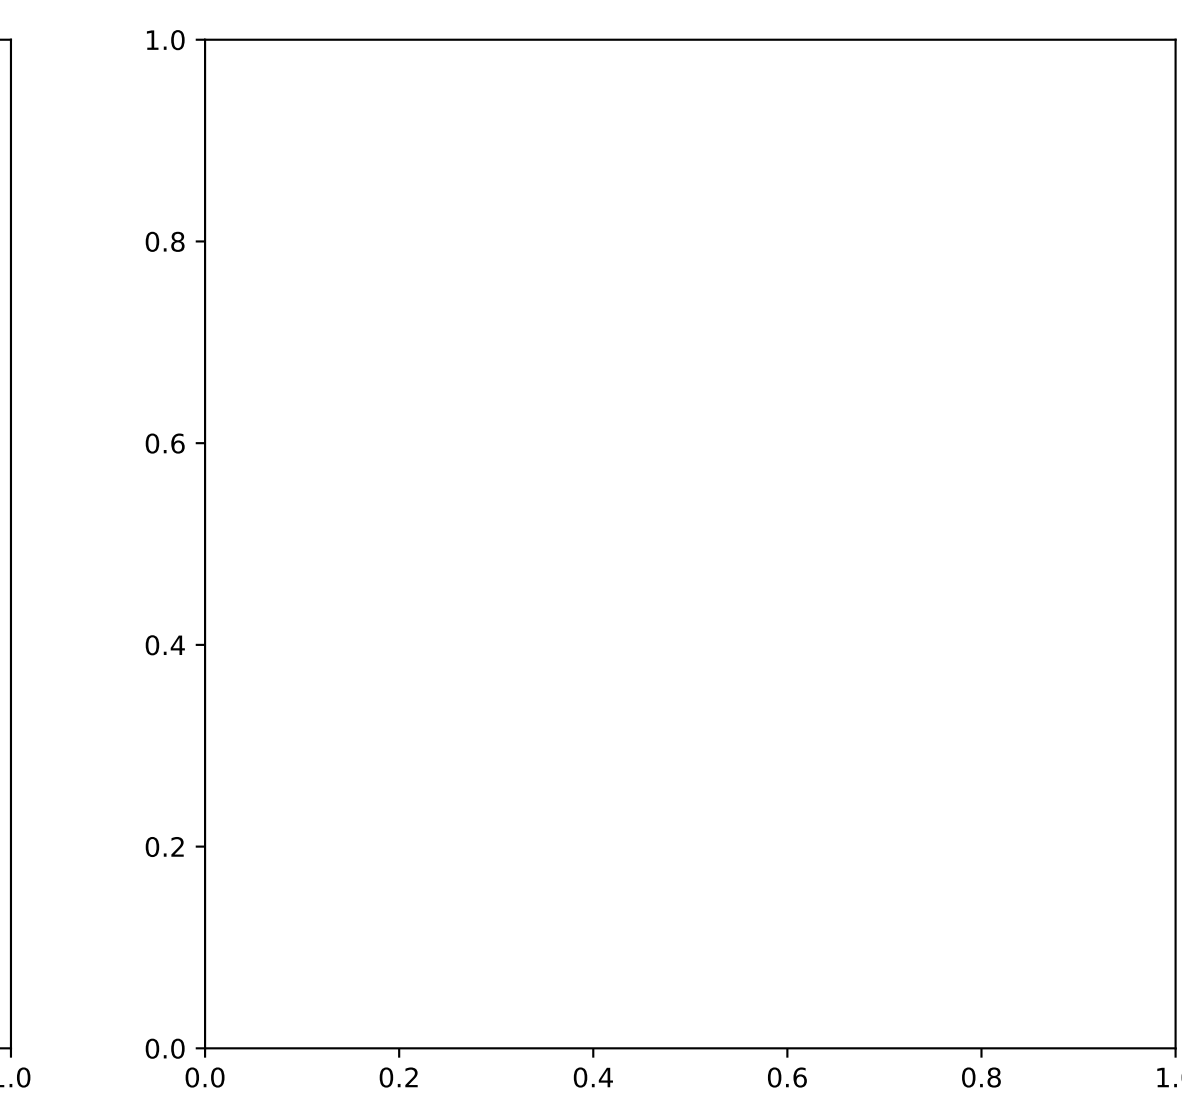

Supplement: supplementary_material [file attachment]

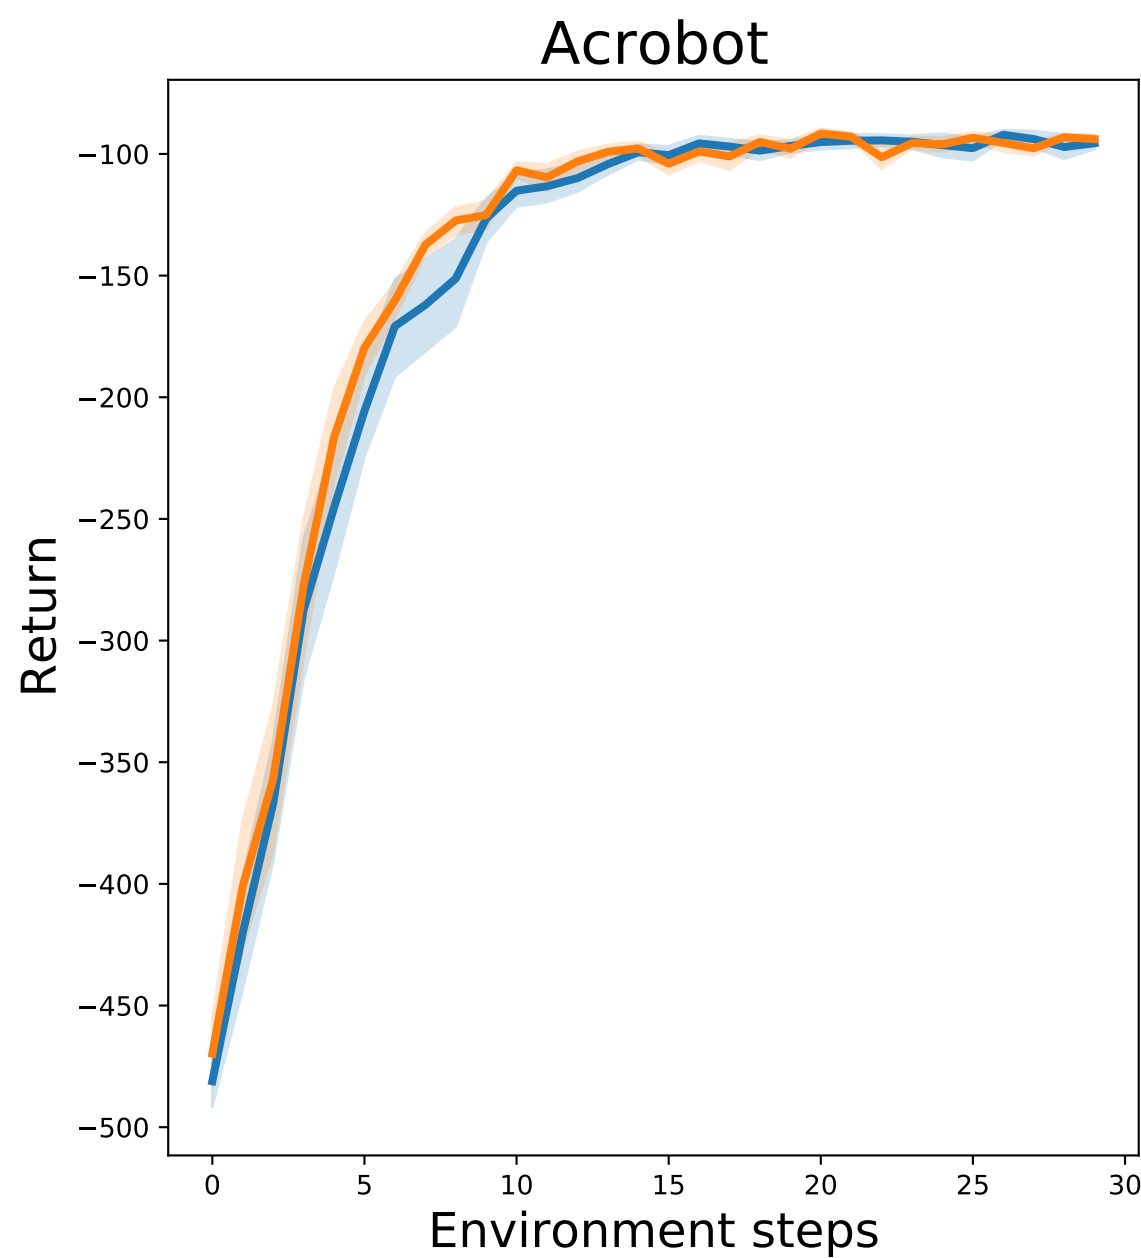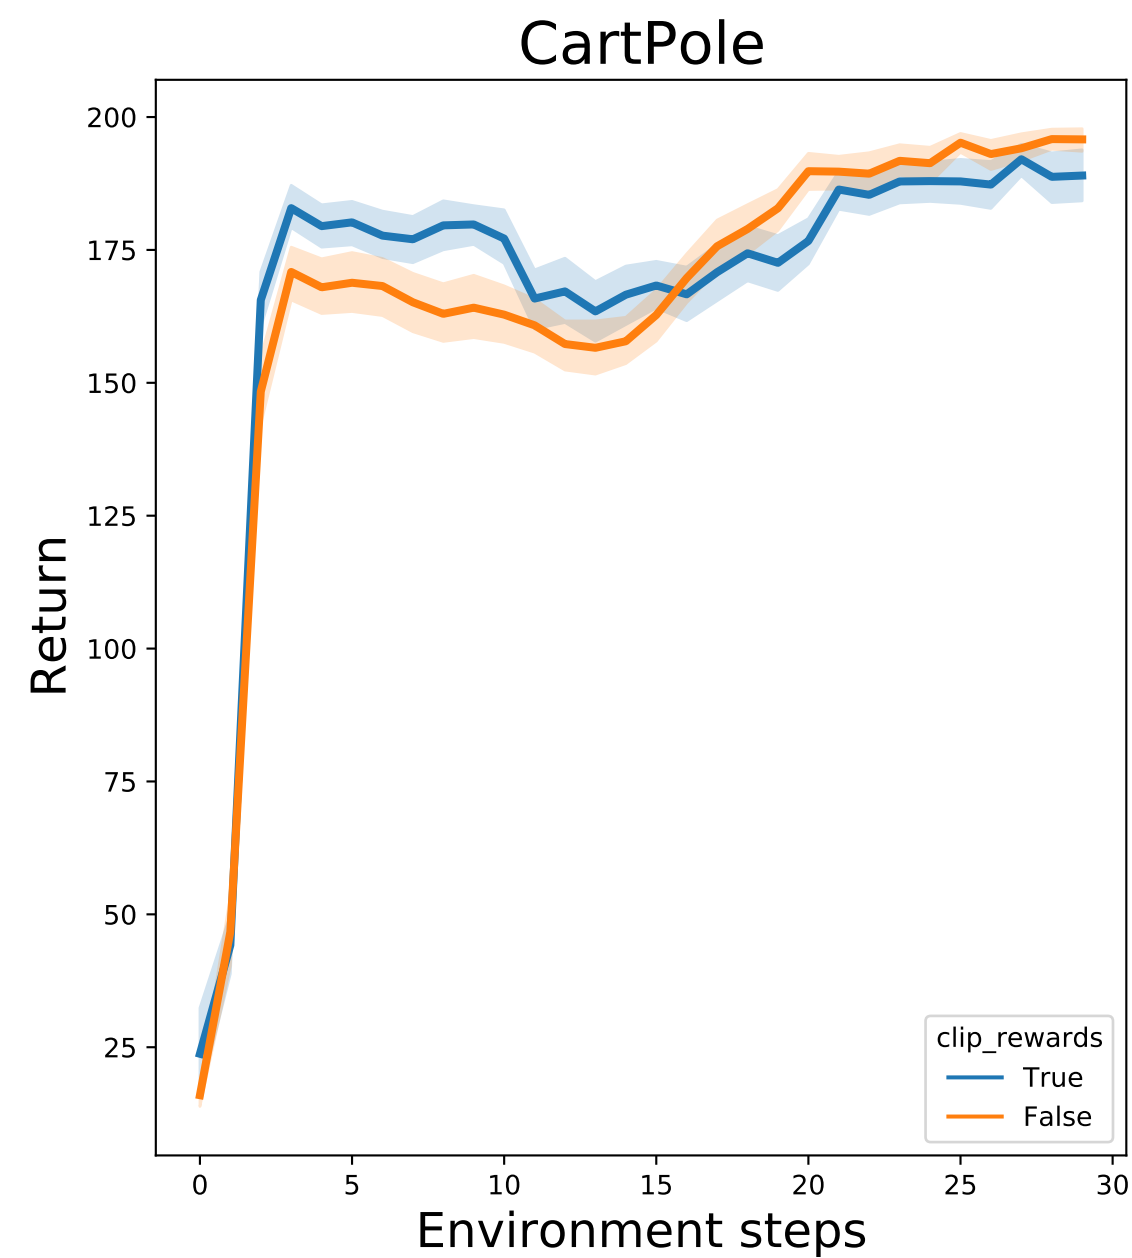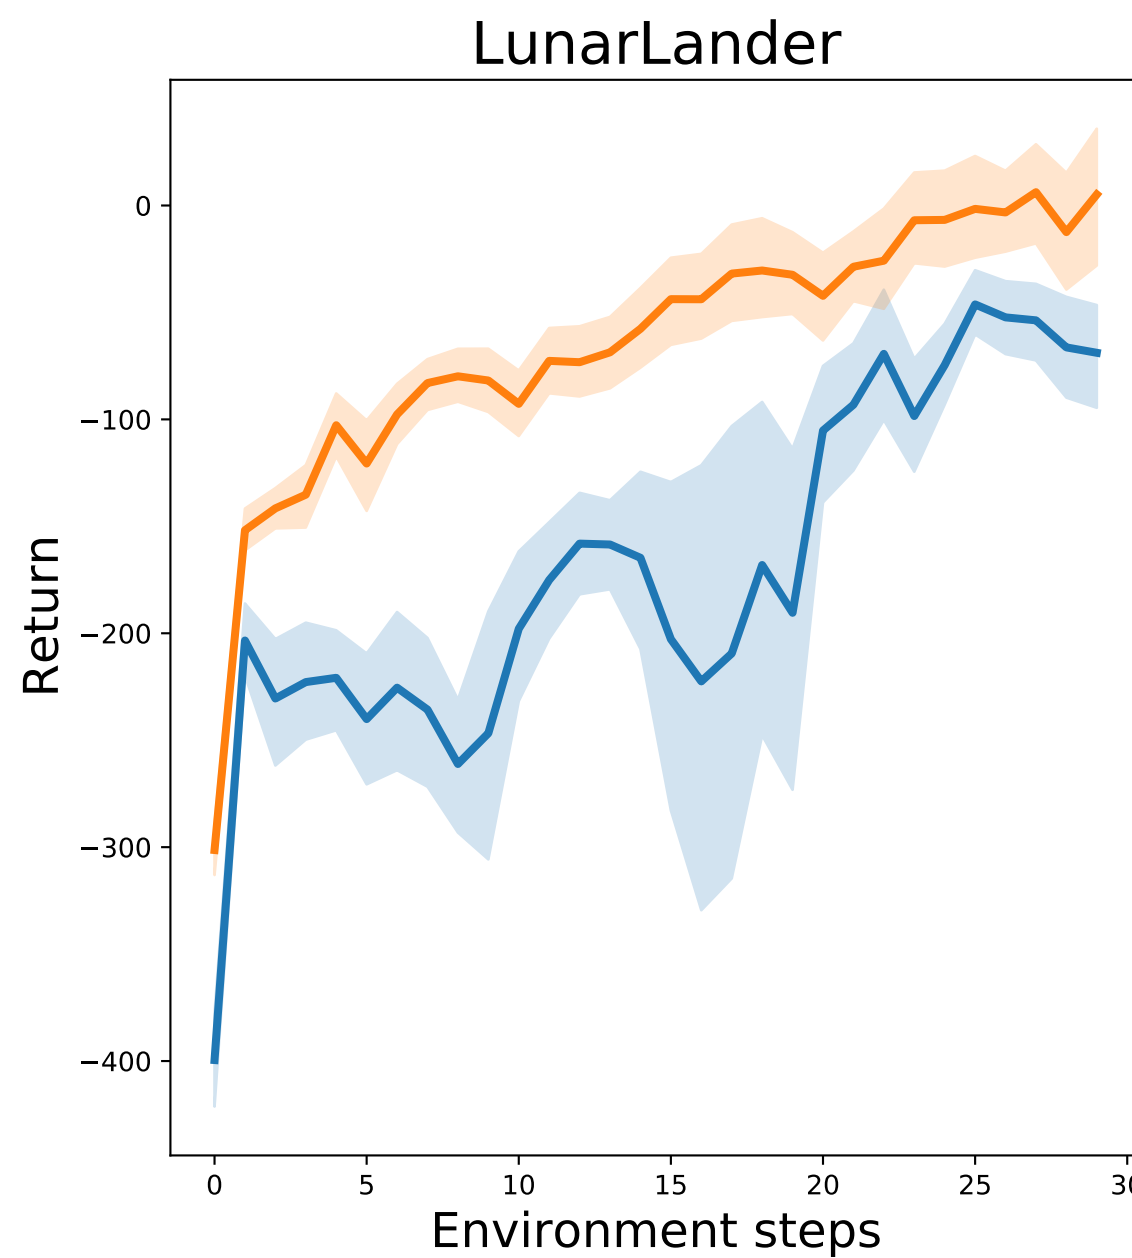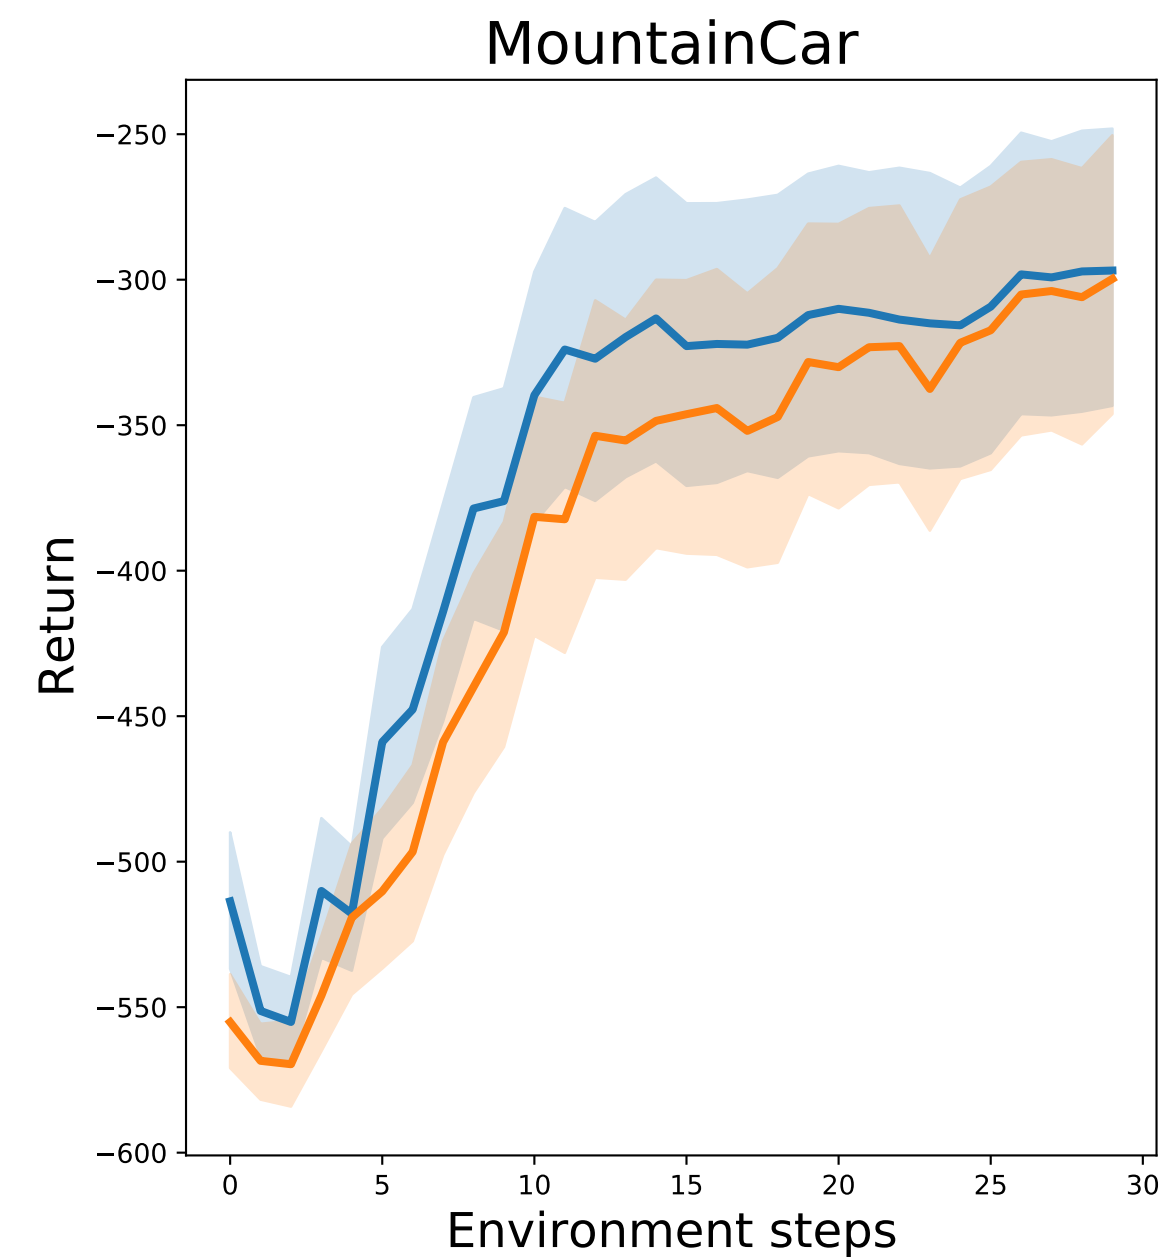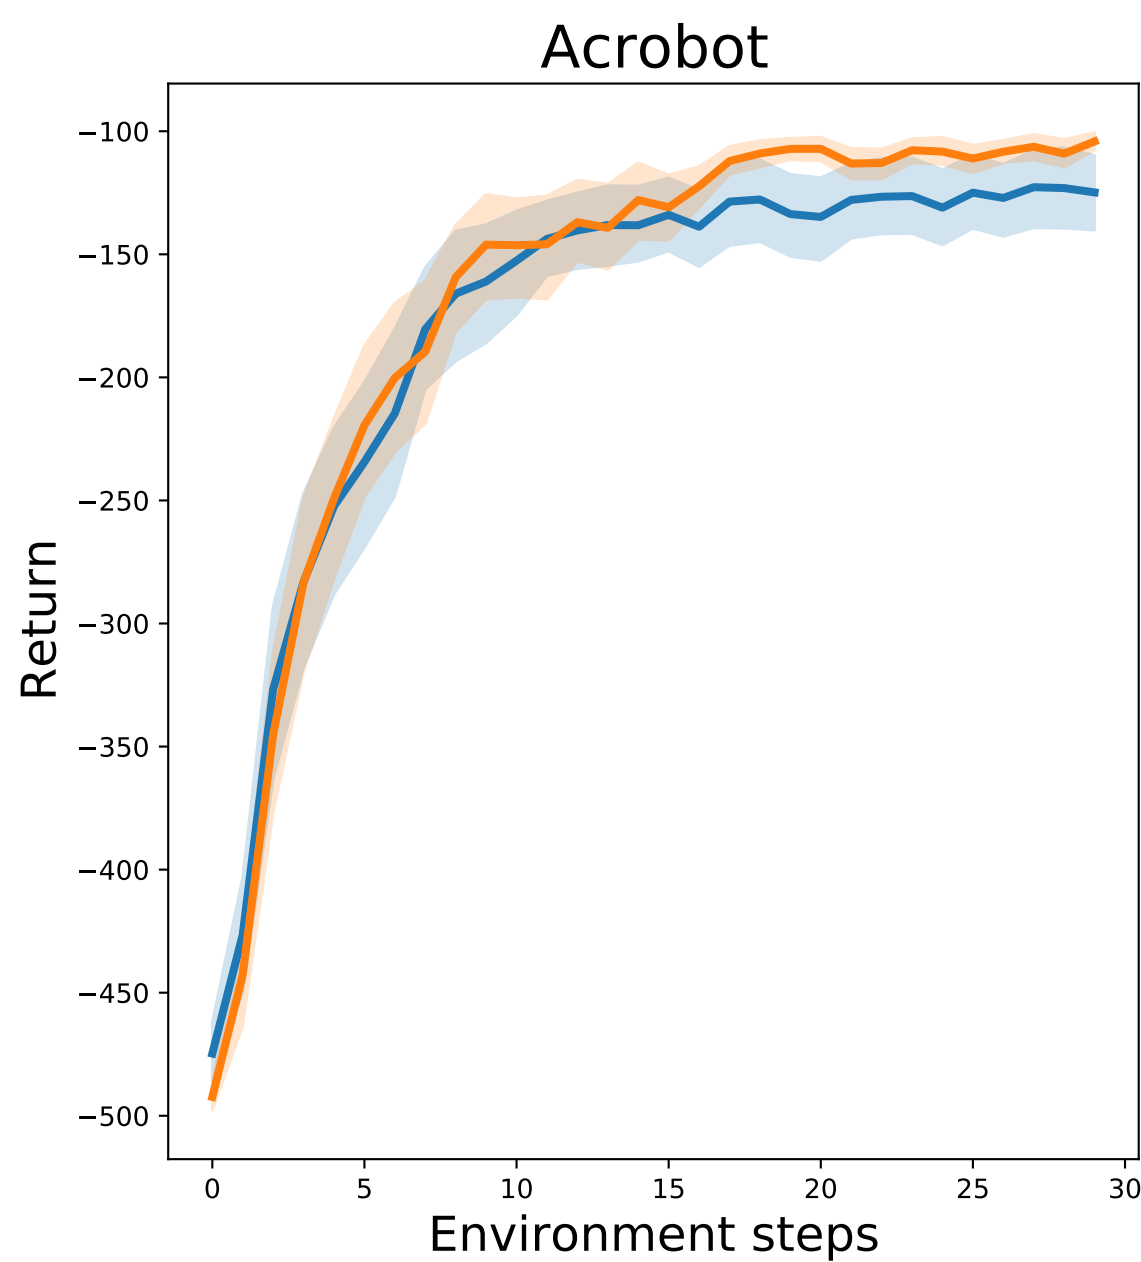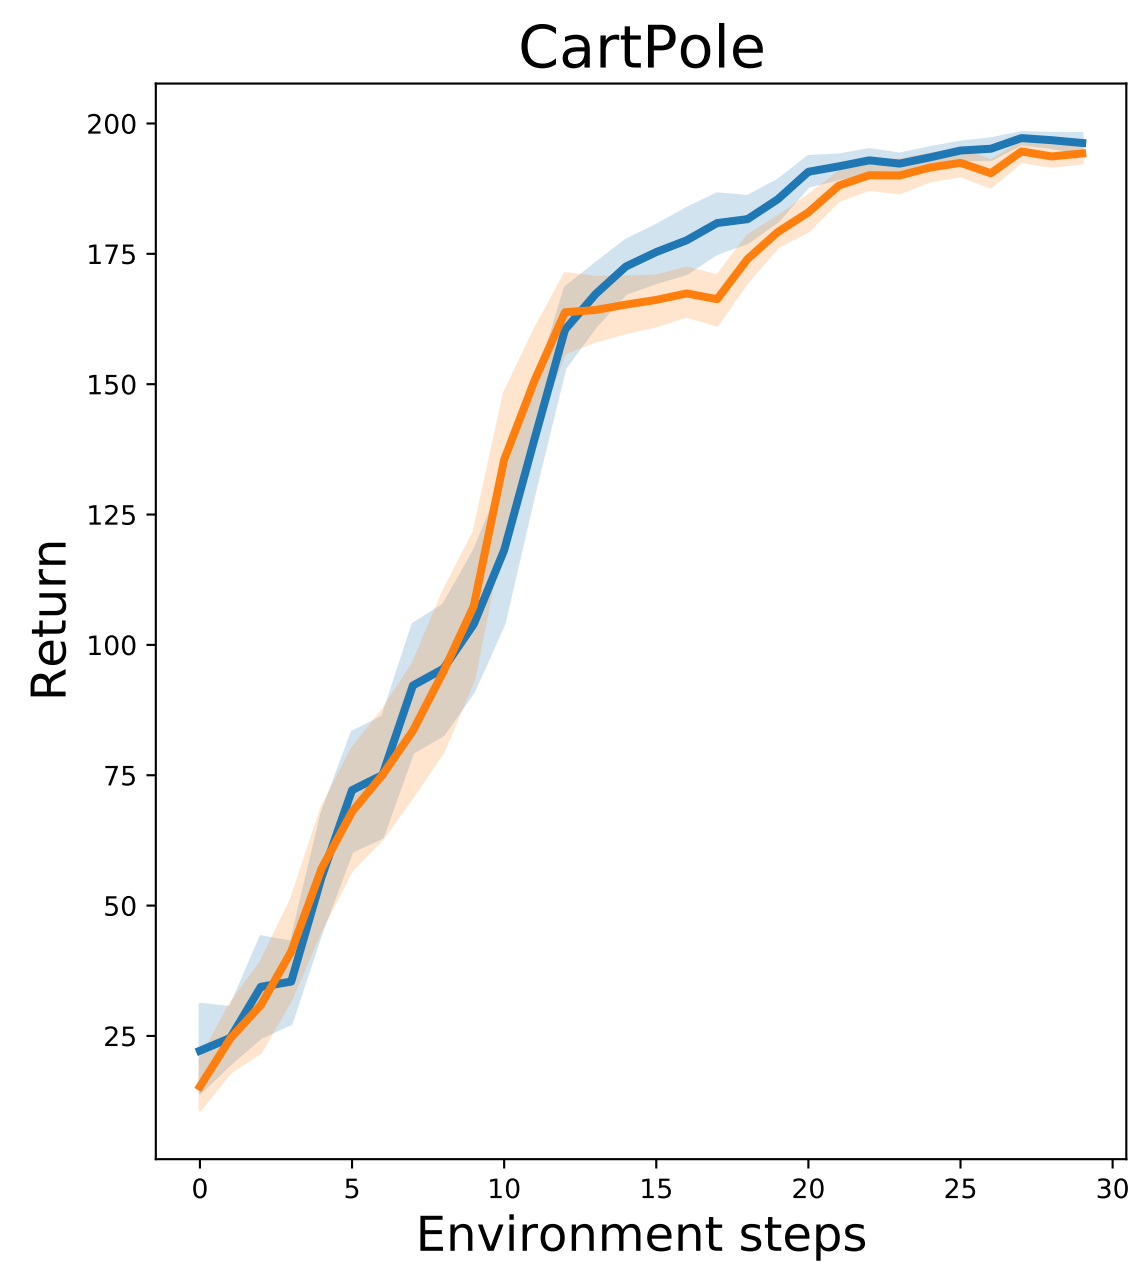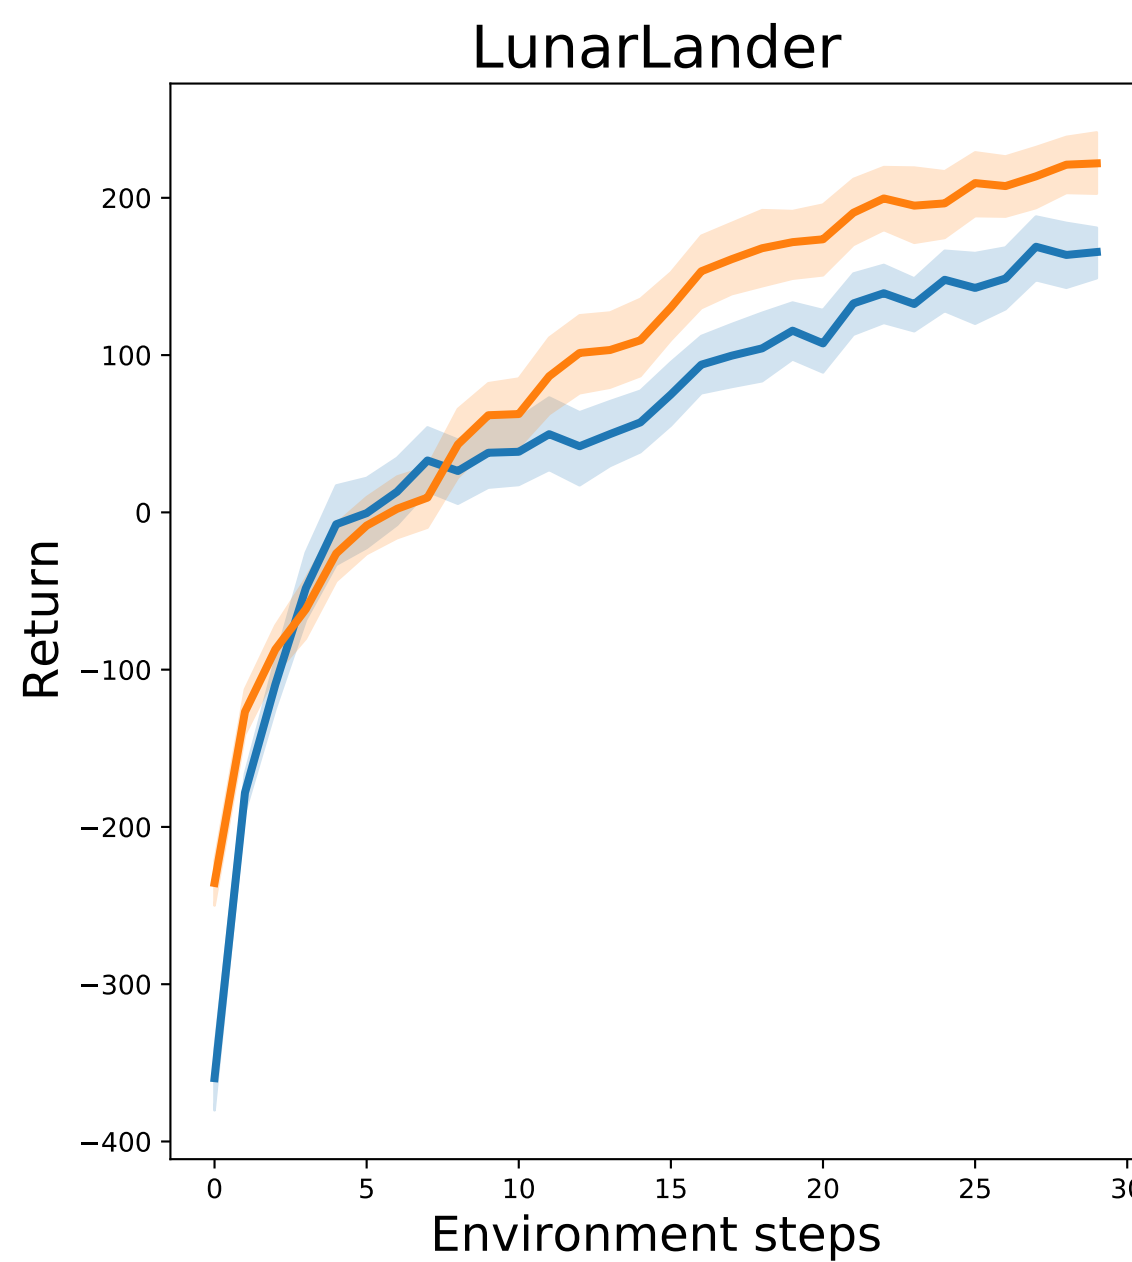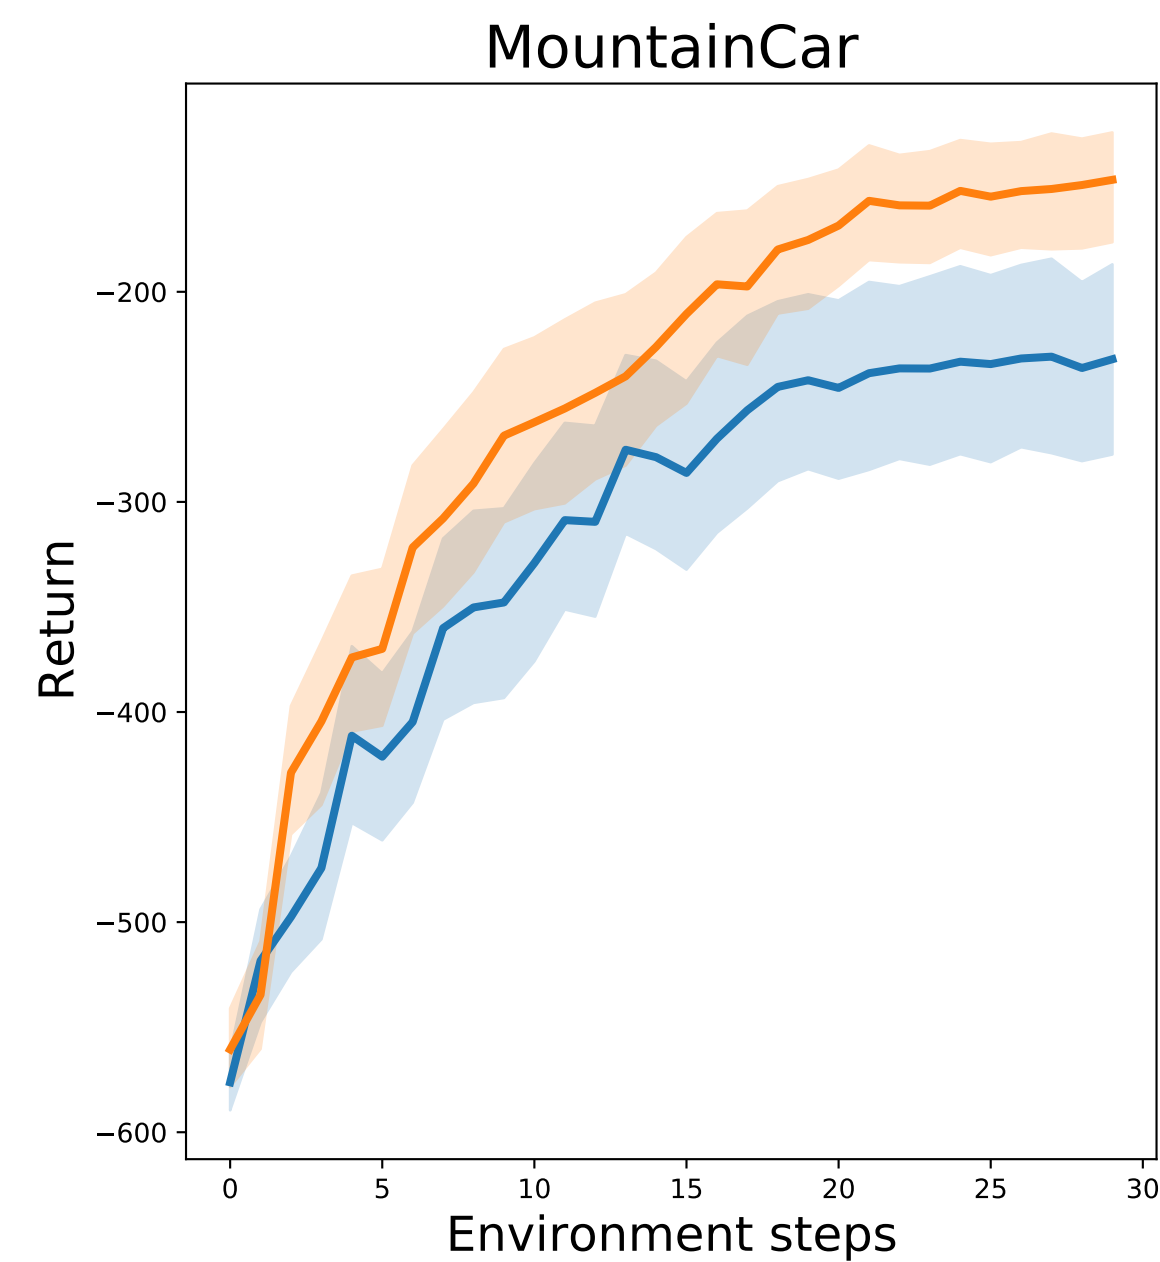

Supplement: supplementary_material [file attachment]

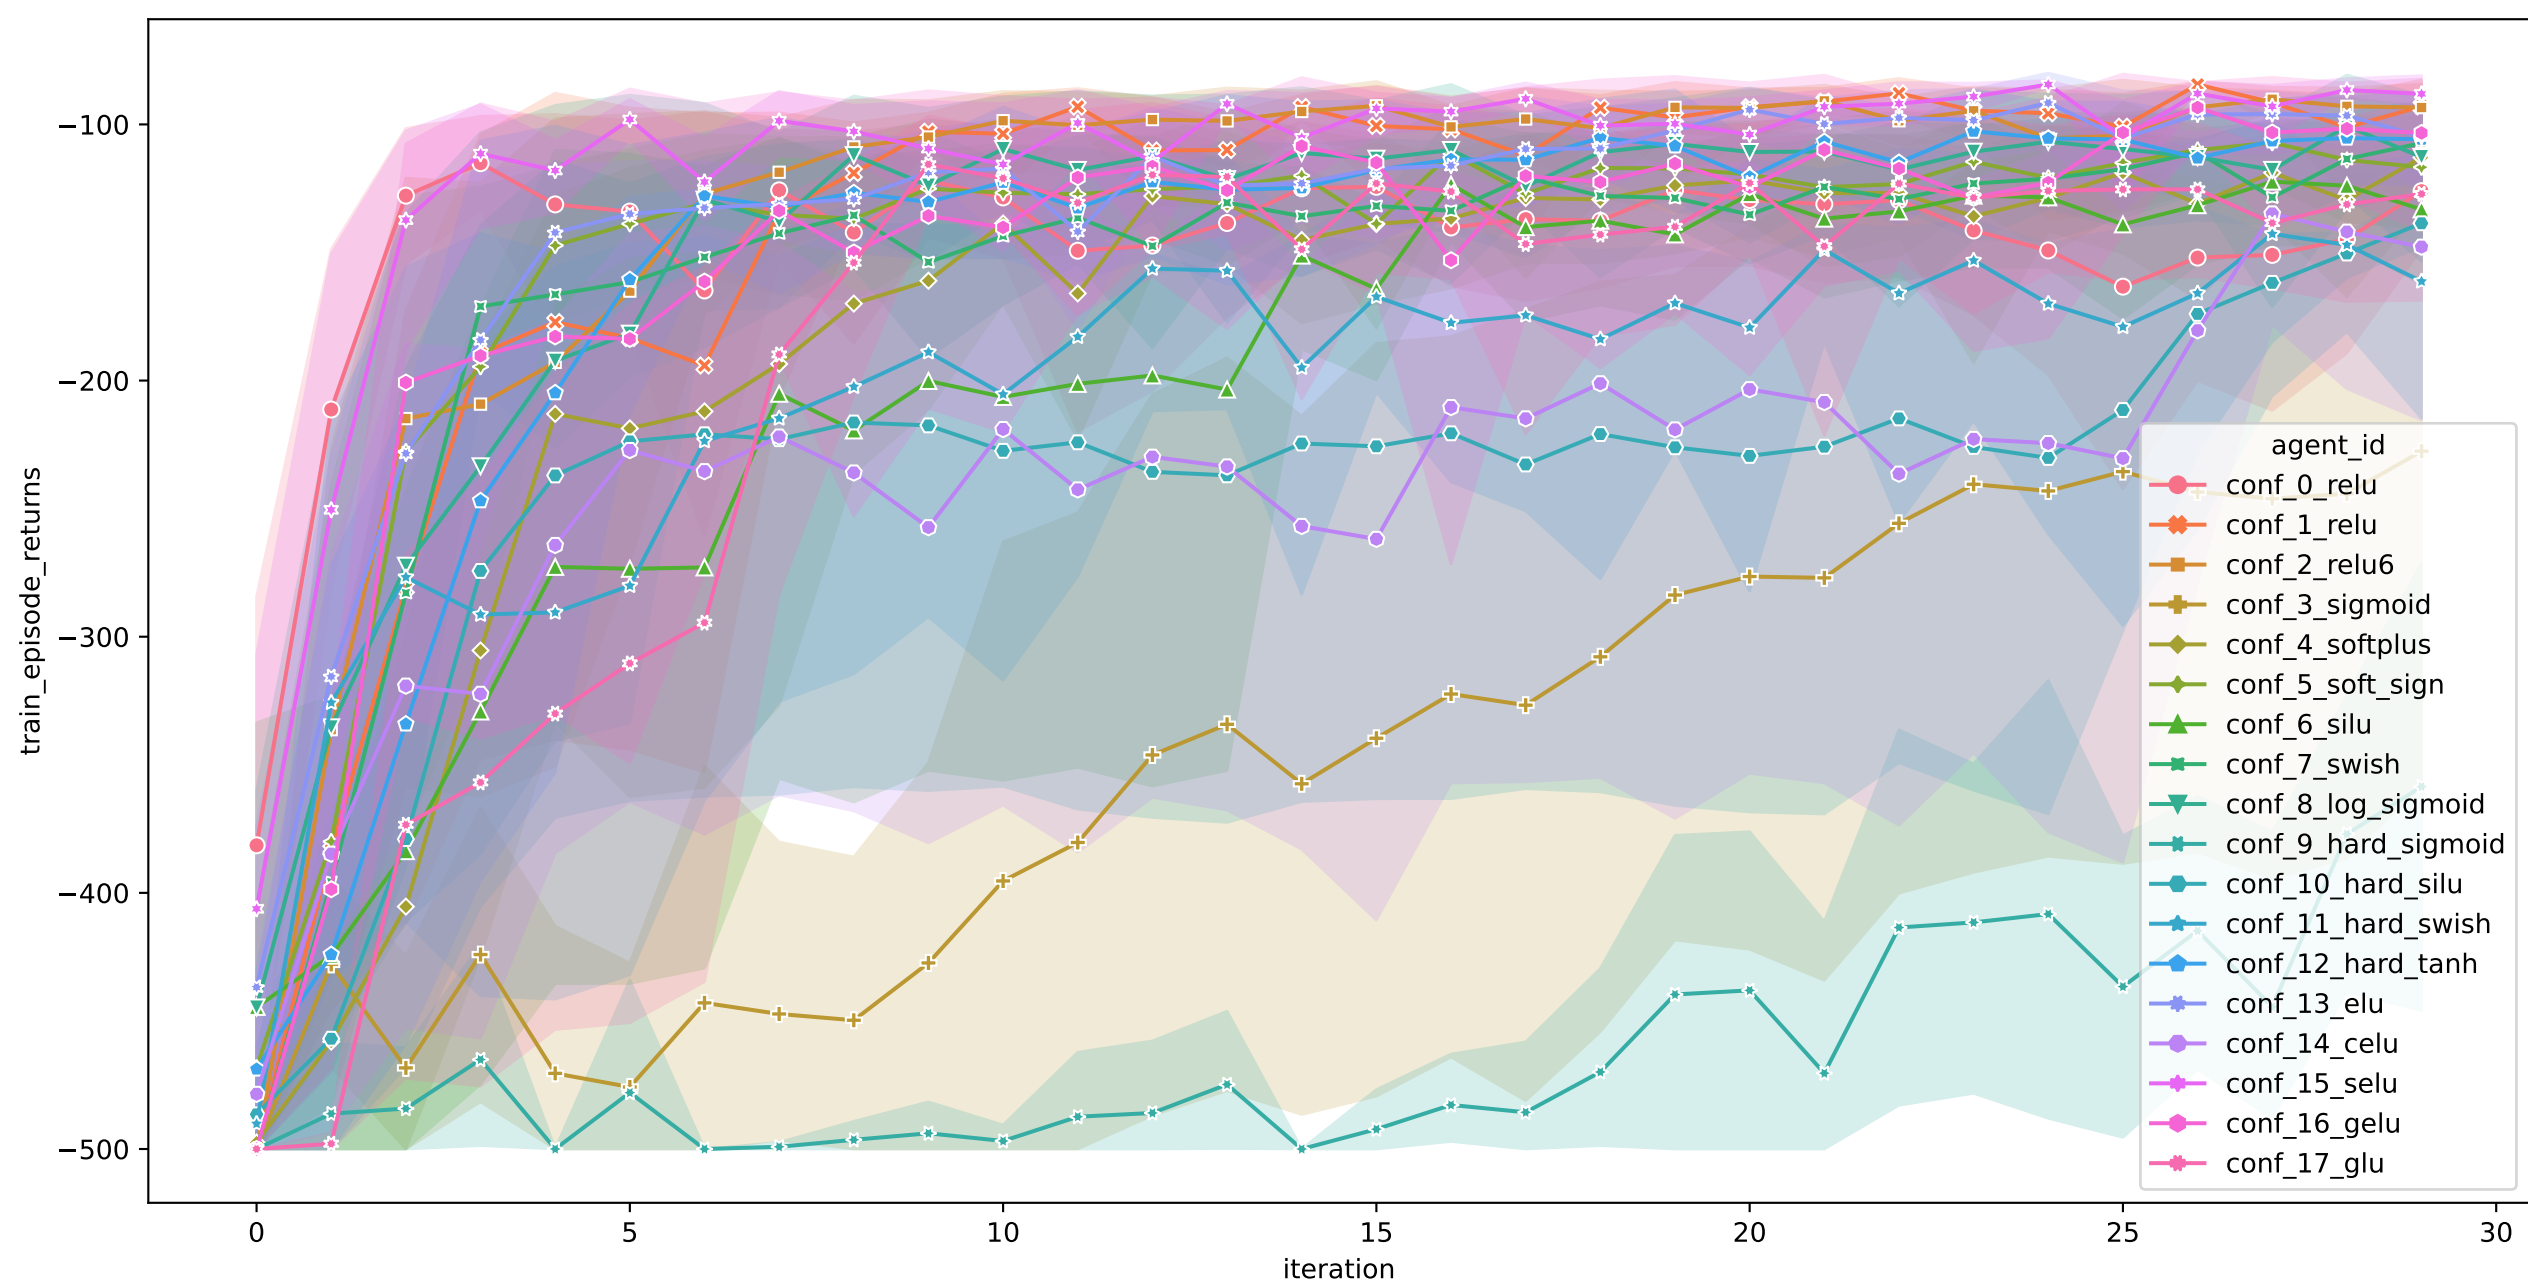

Supplement: supplementary_material [file attachment]

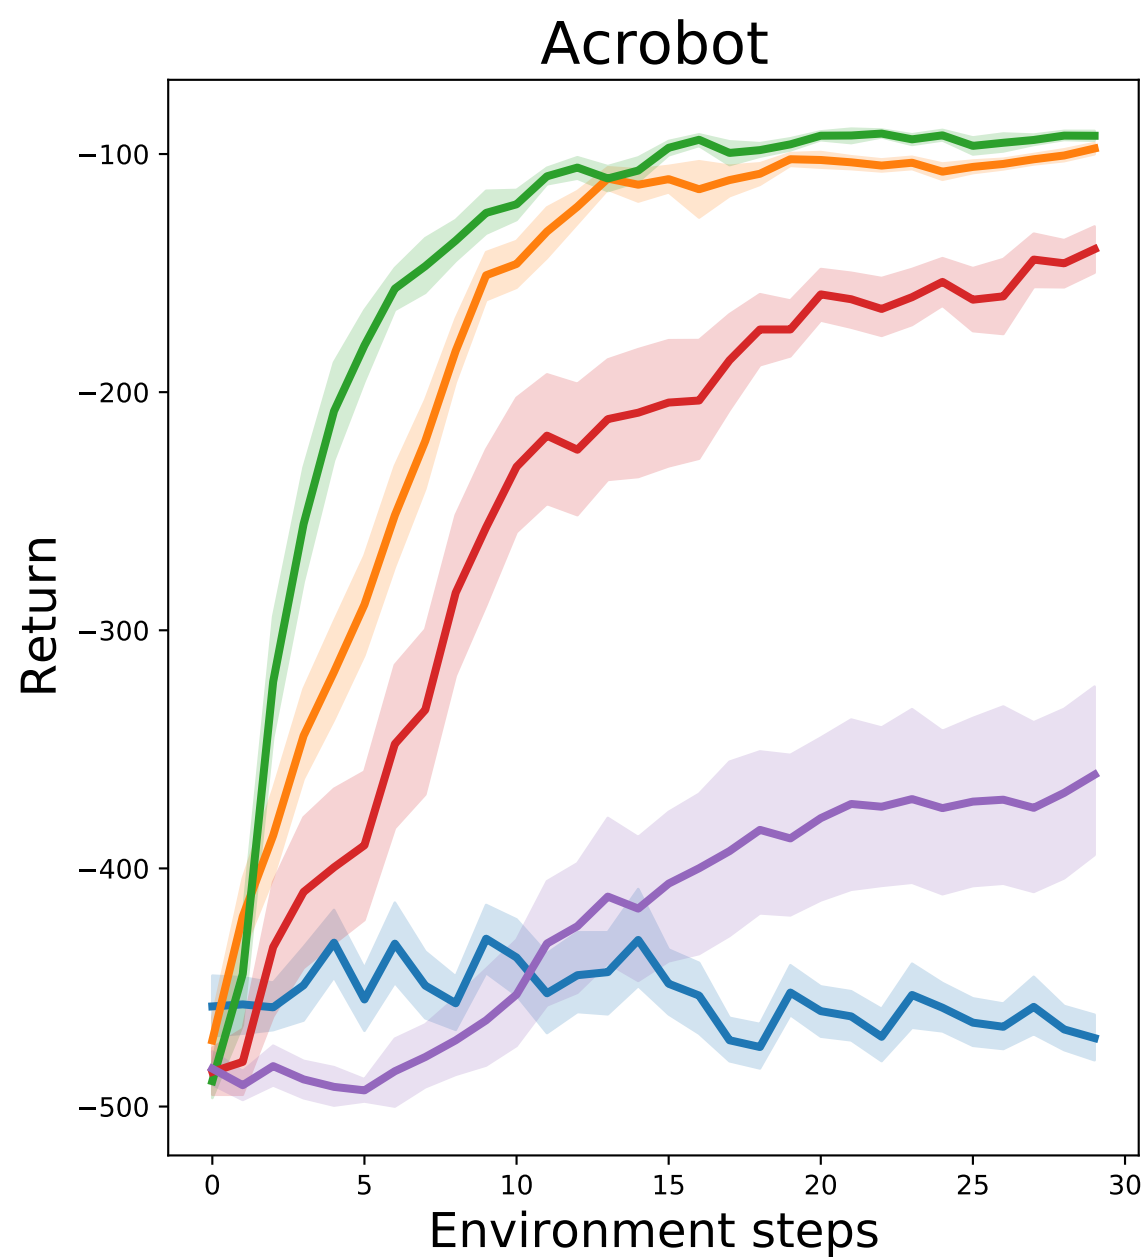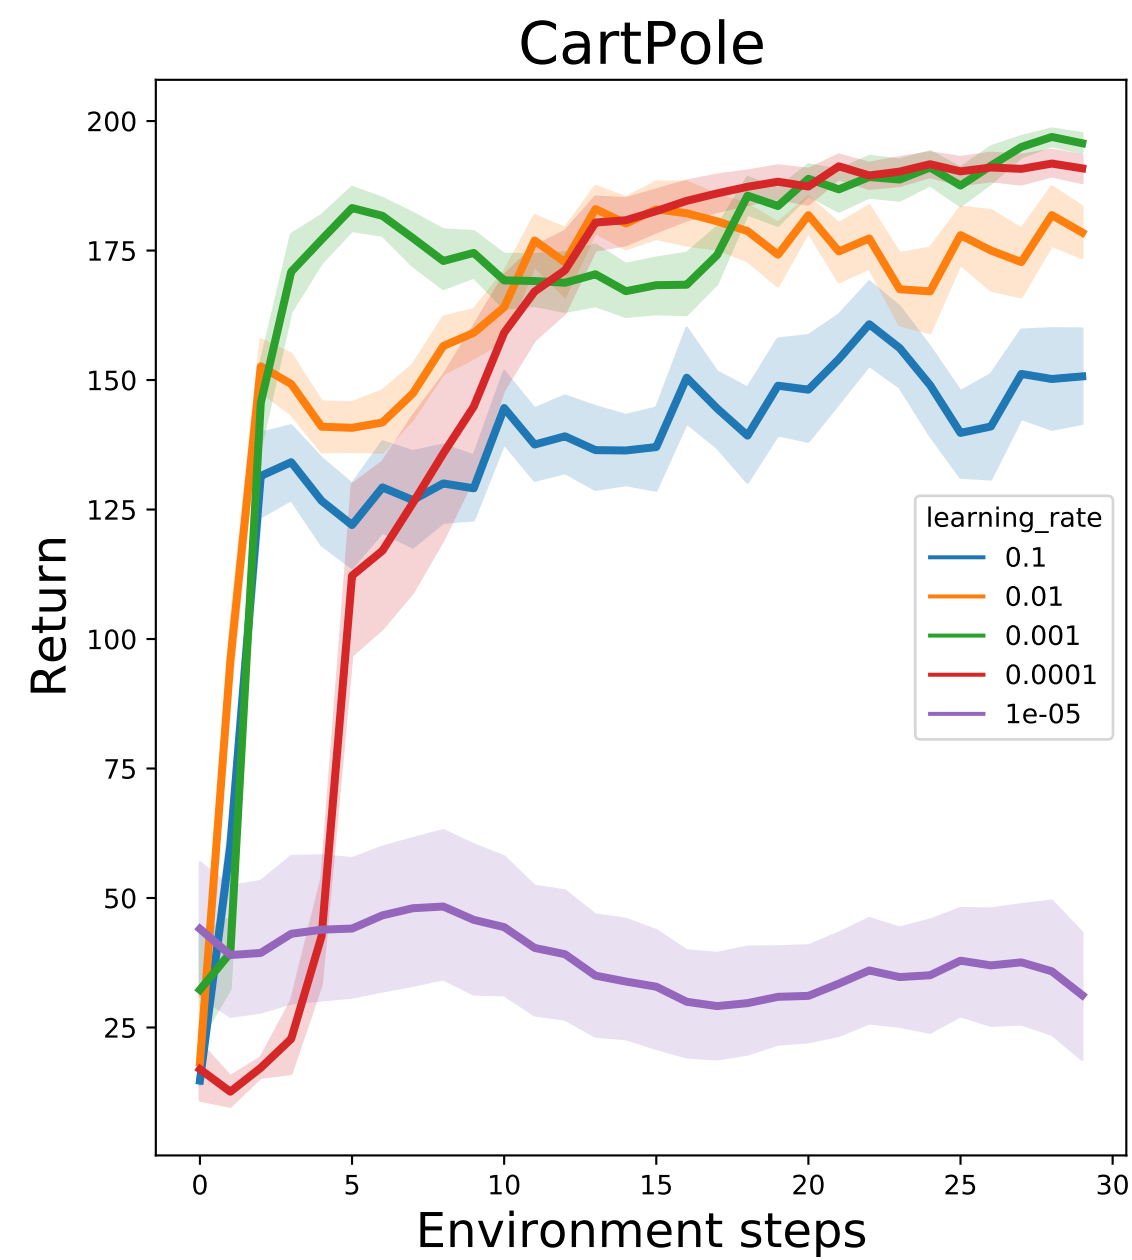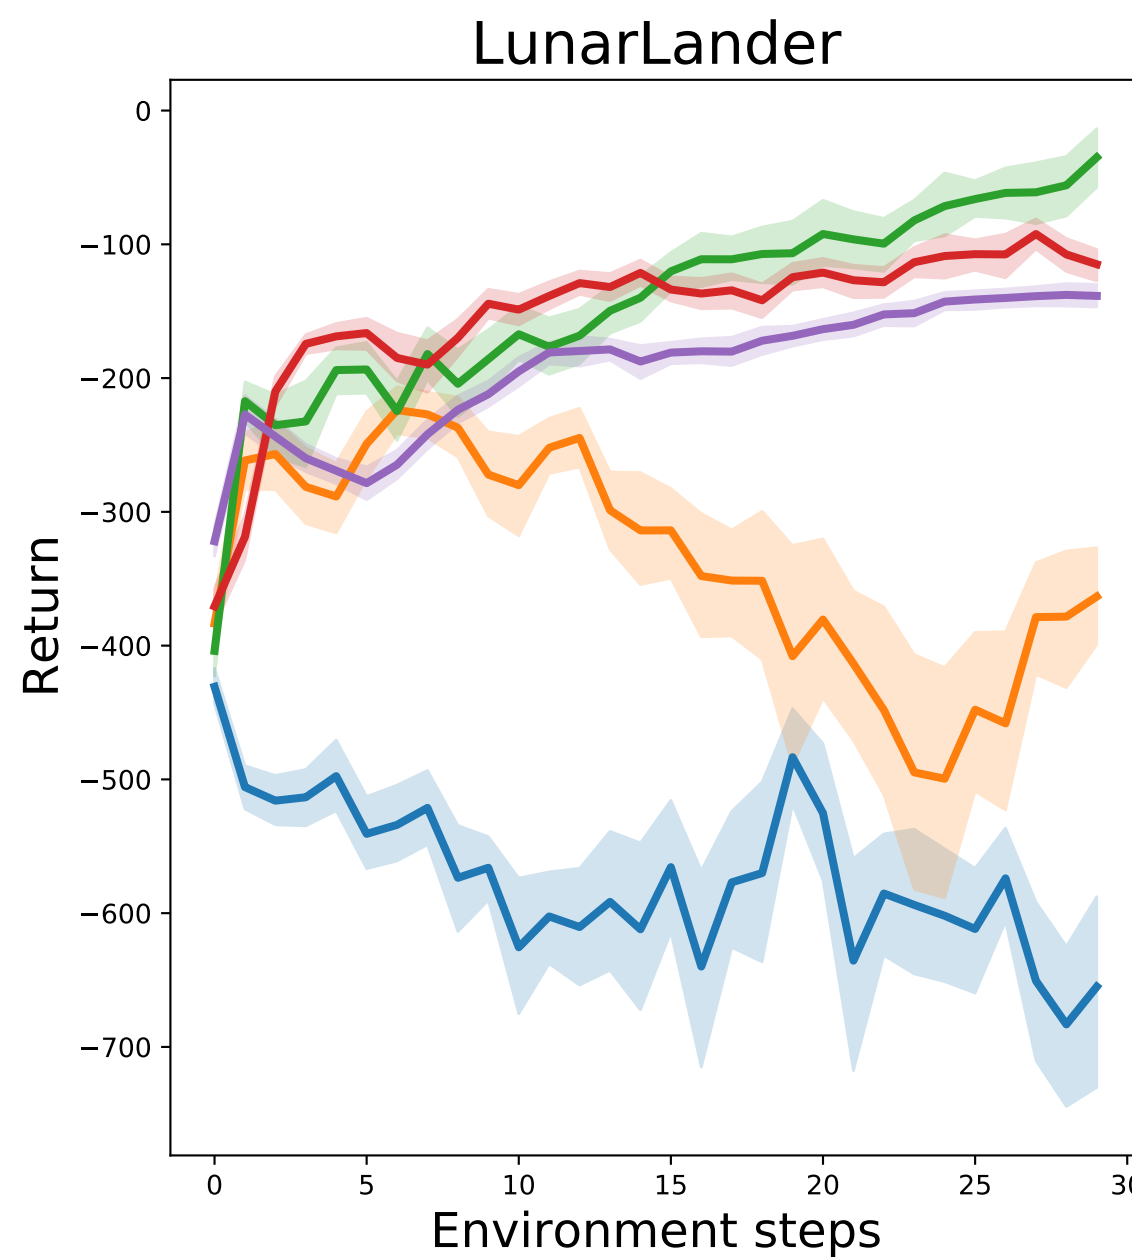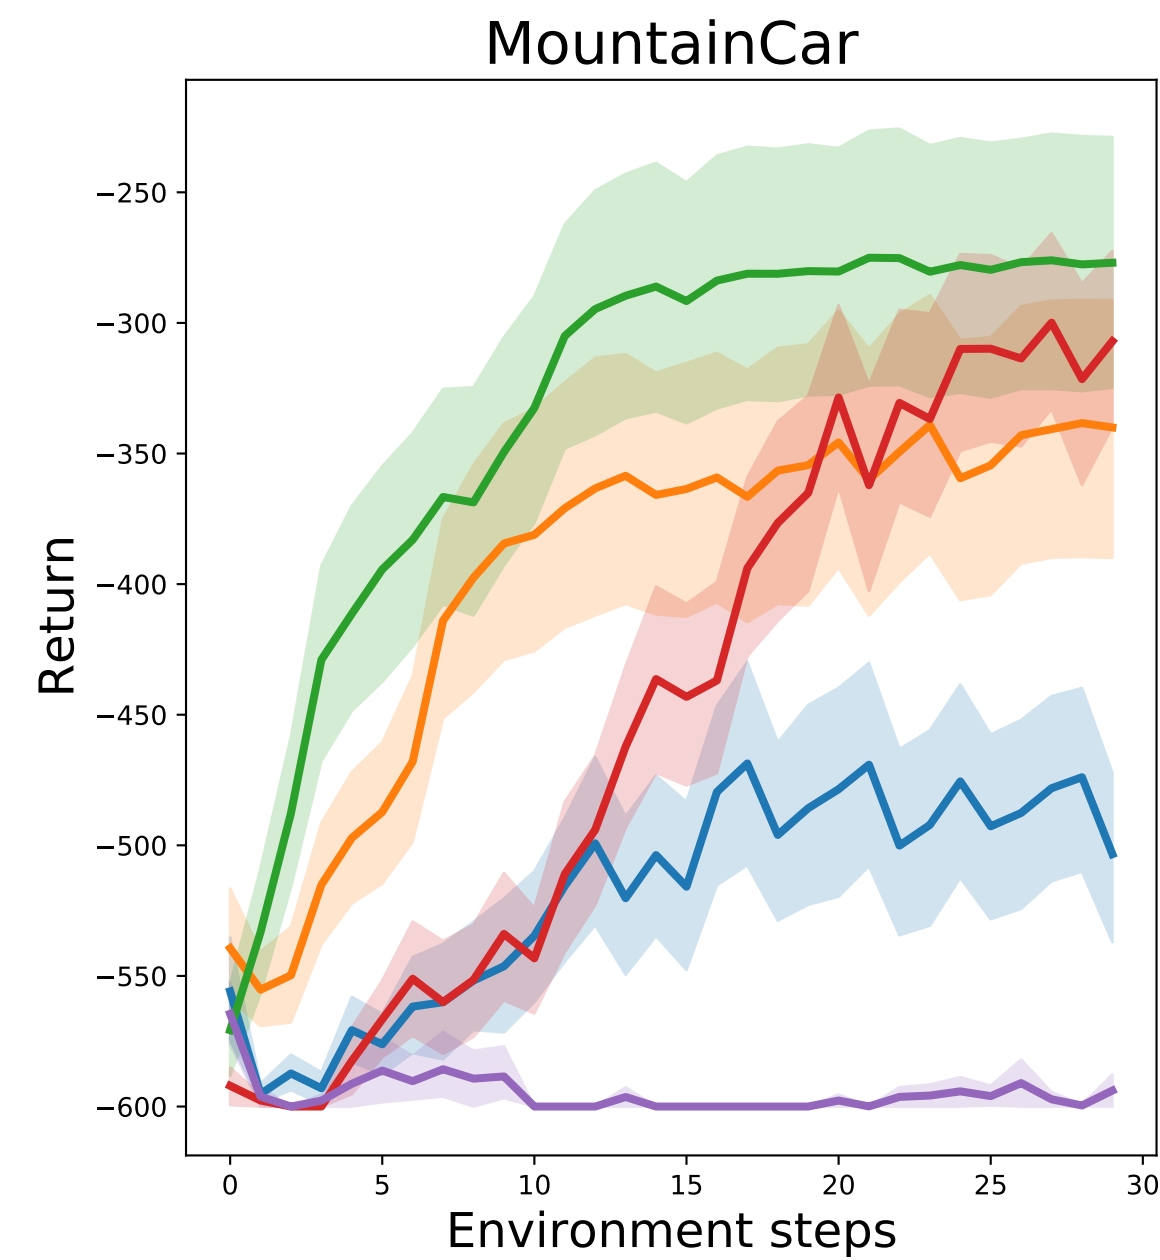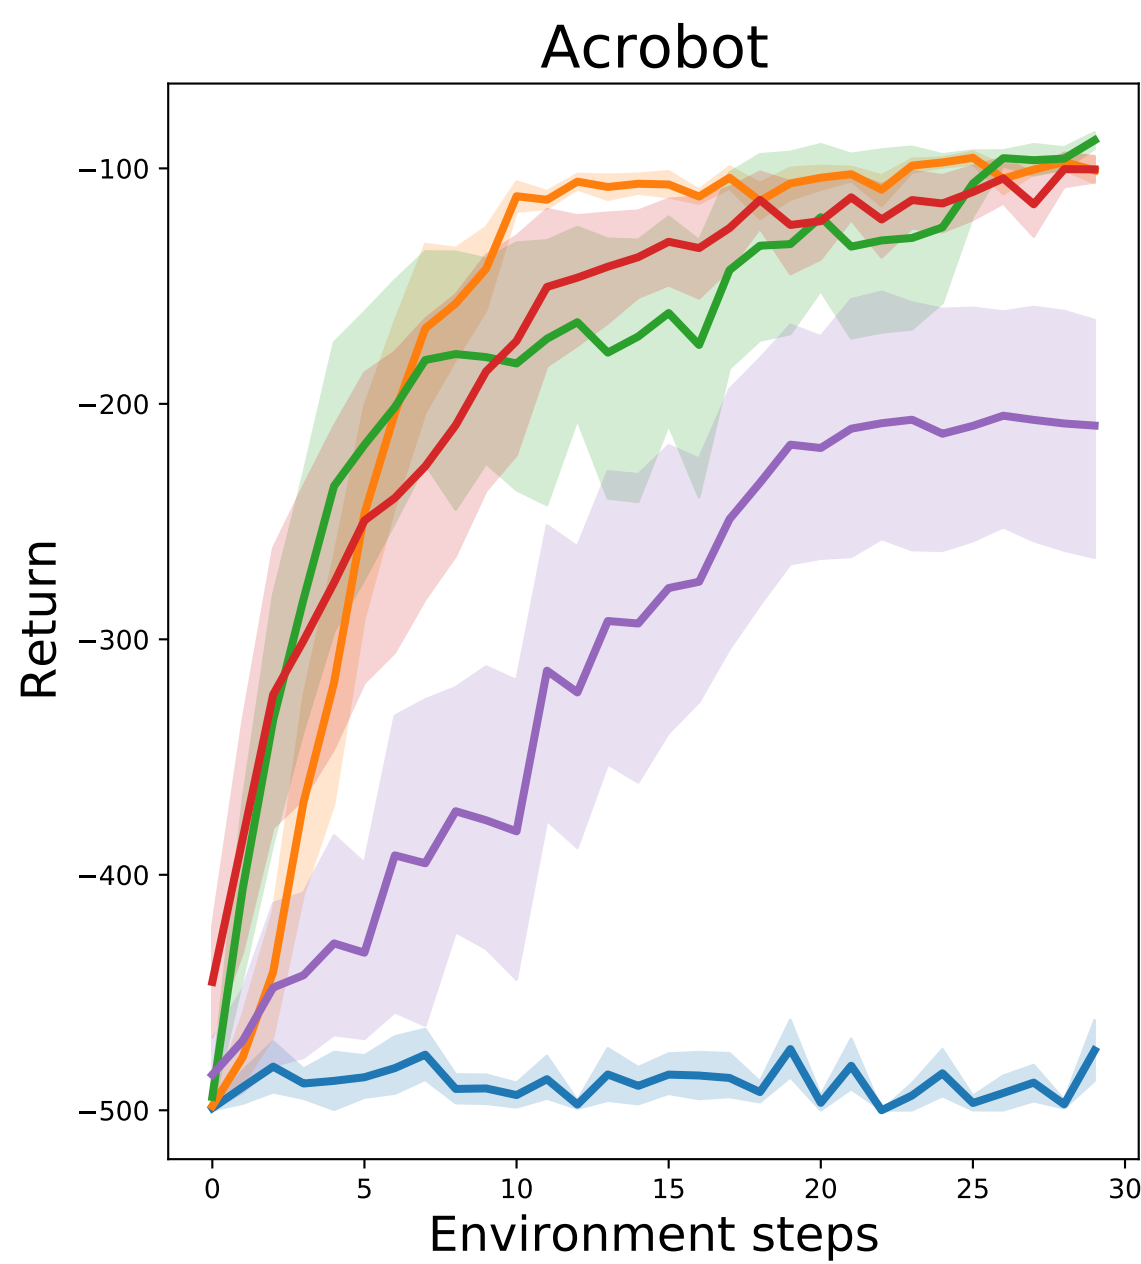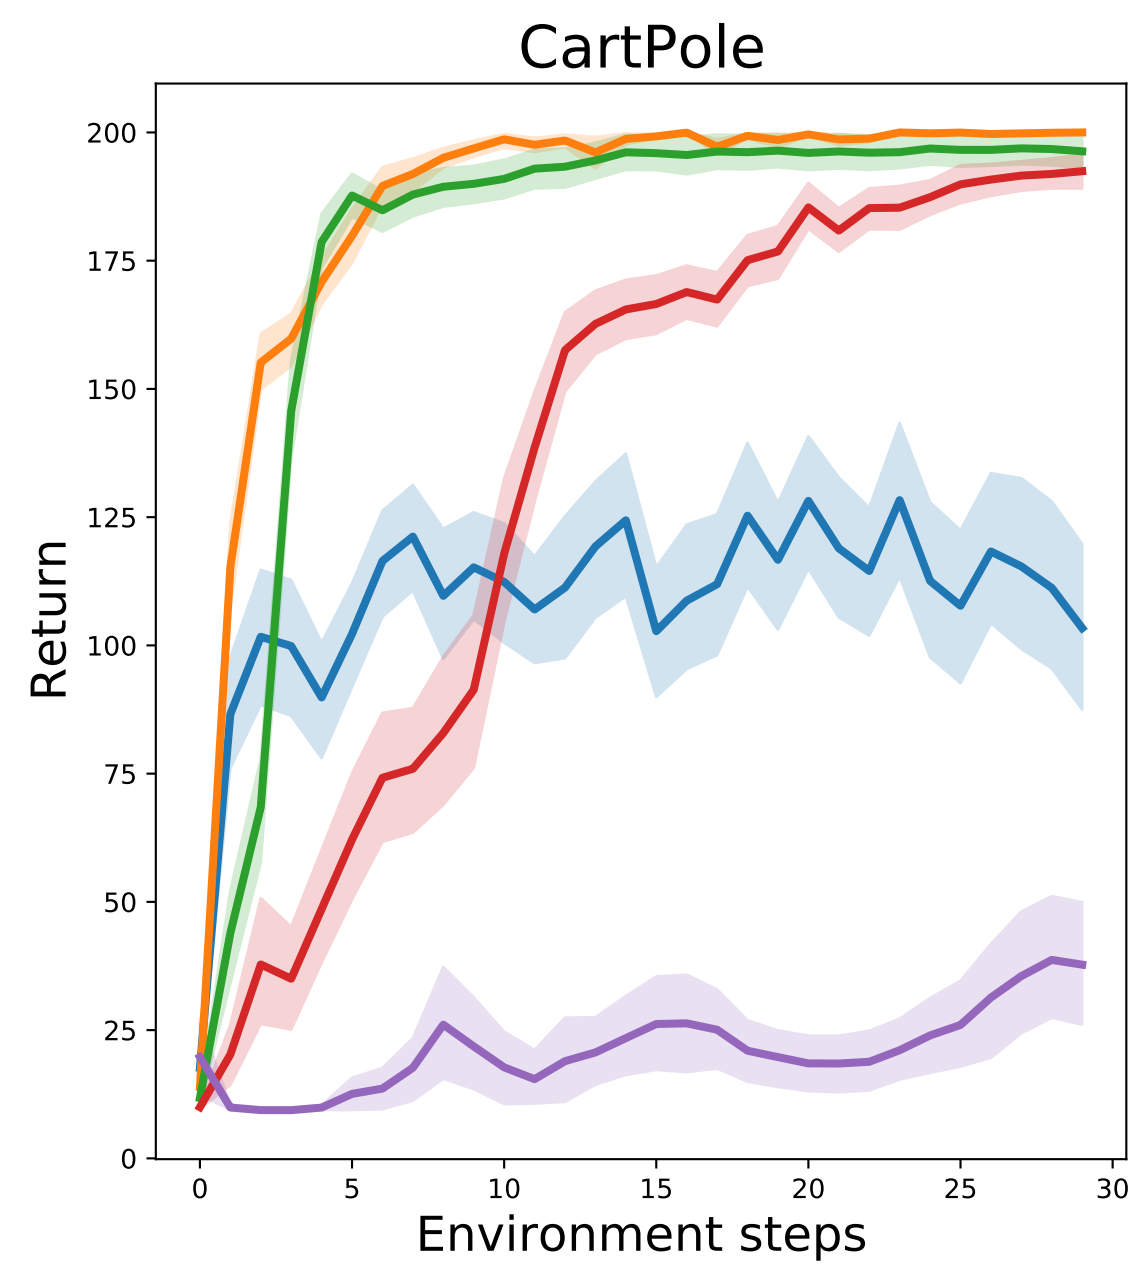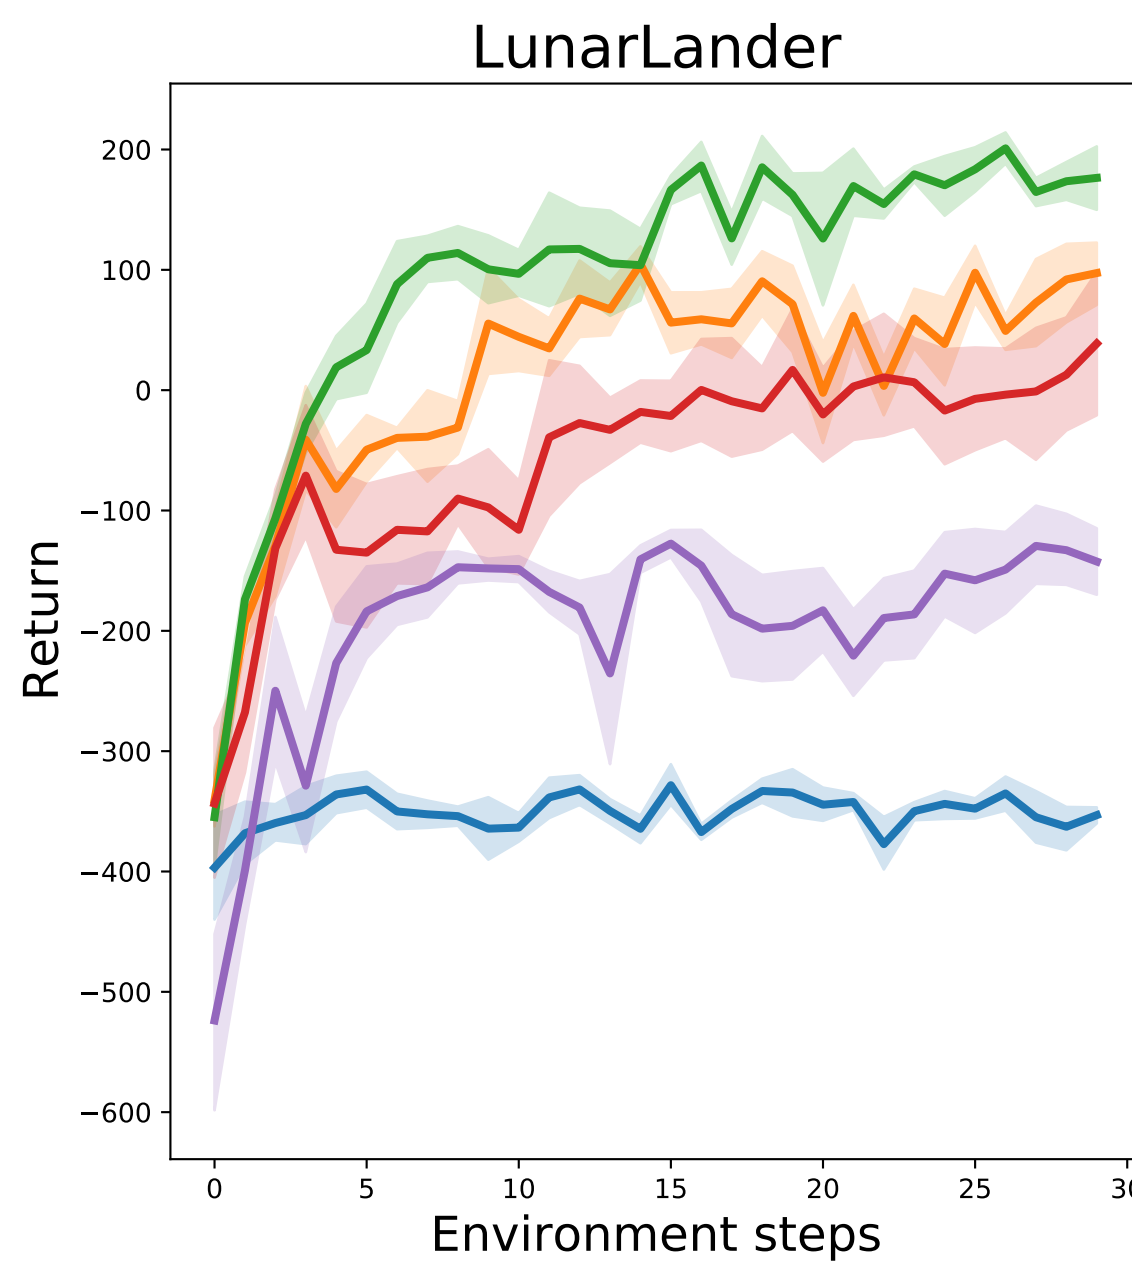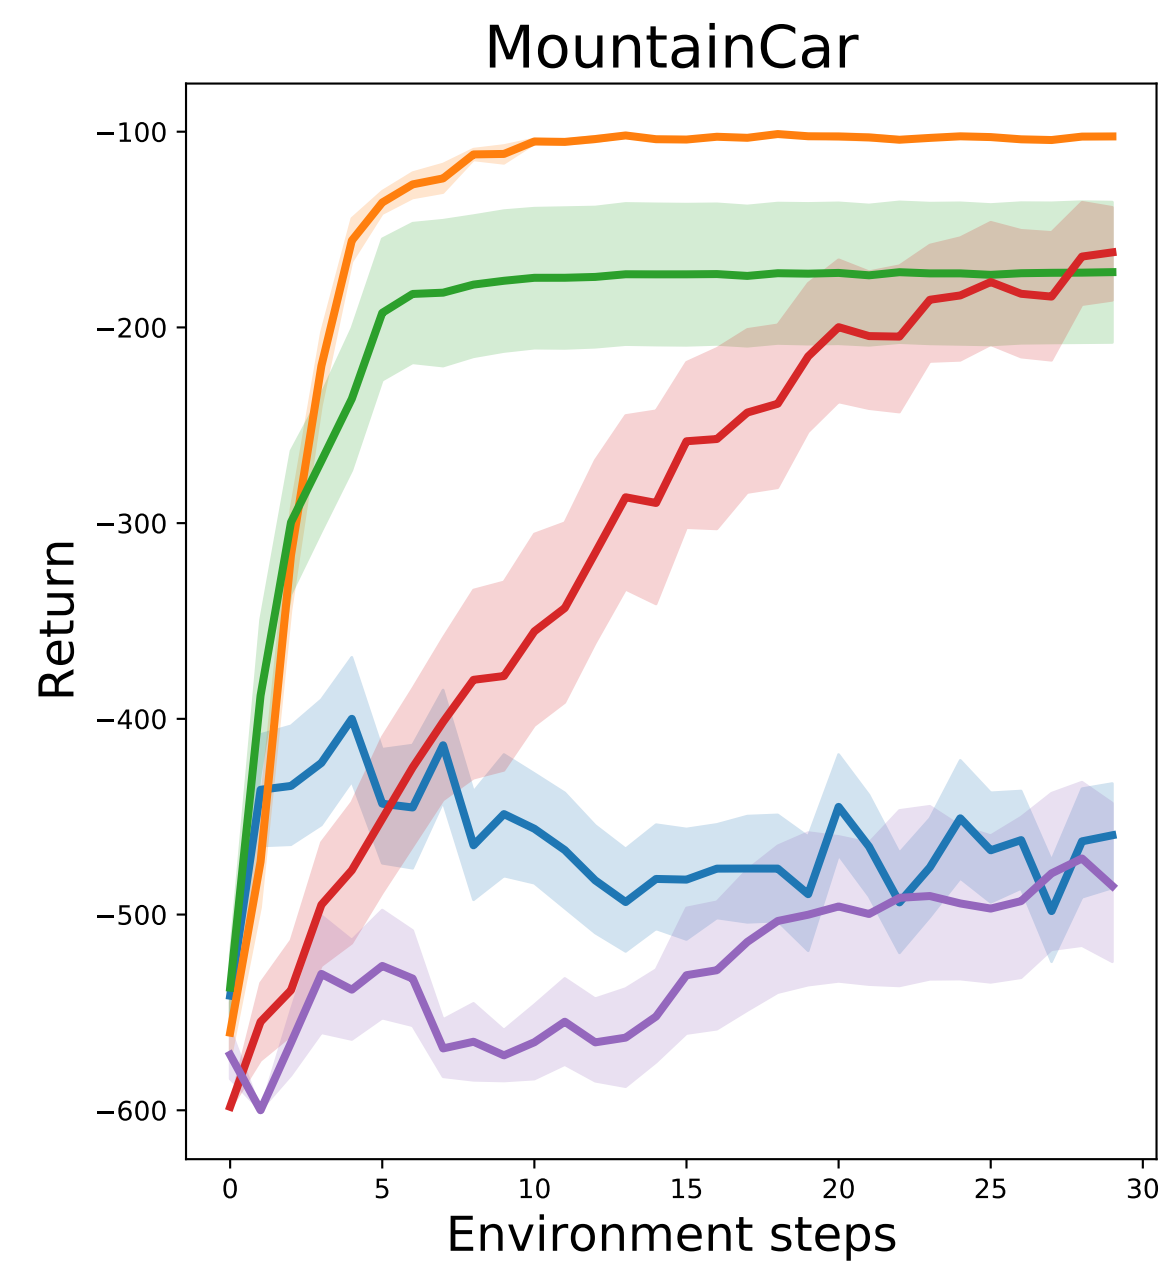

Supplement: supplementary_material [file attachment]

Acrobot

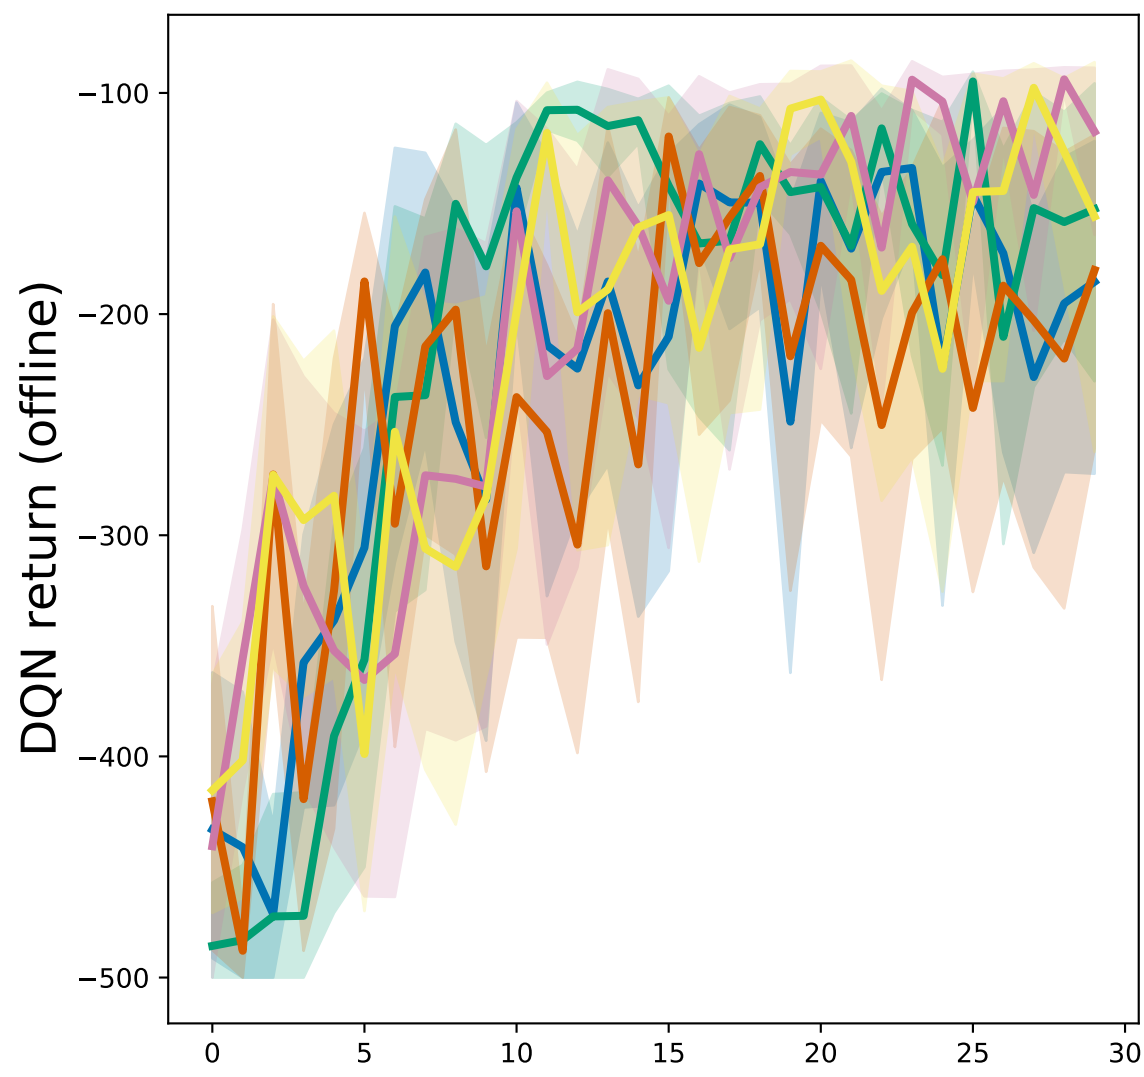

CartPole

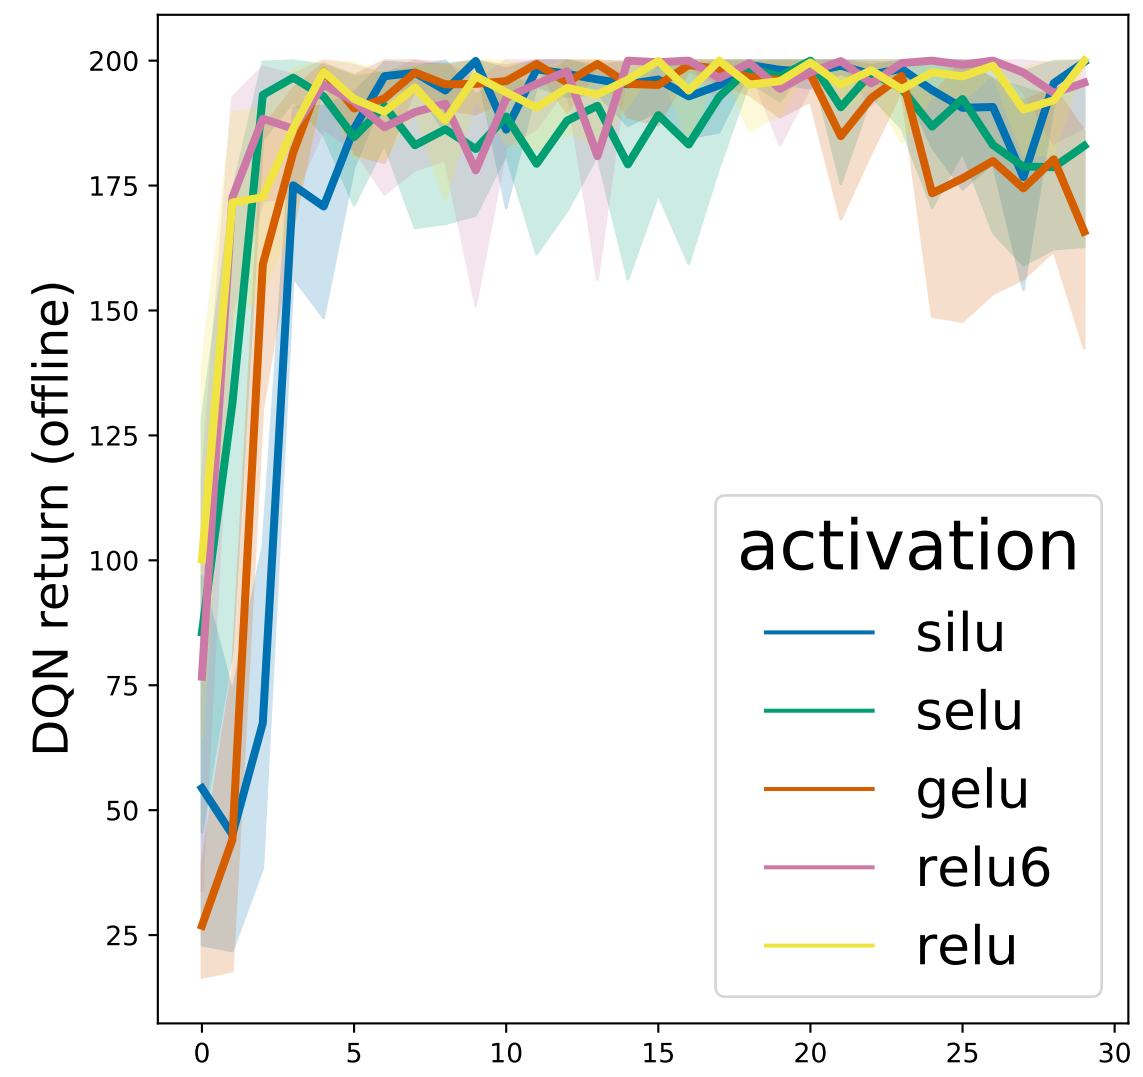

LunarLander

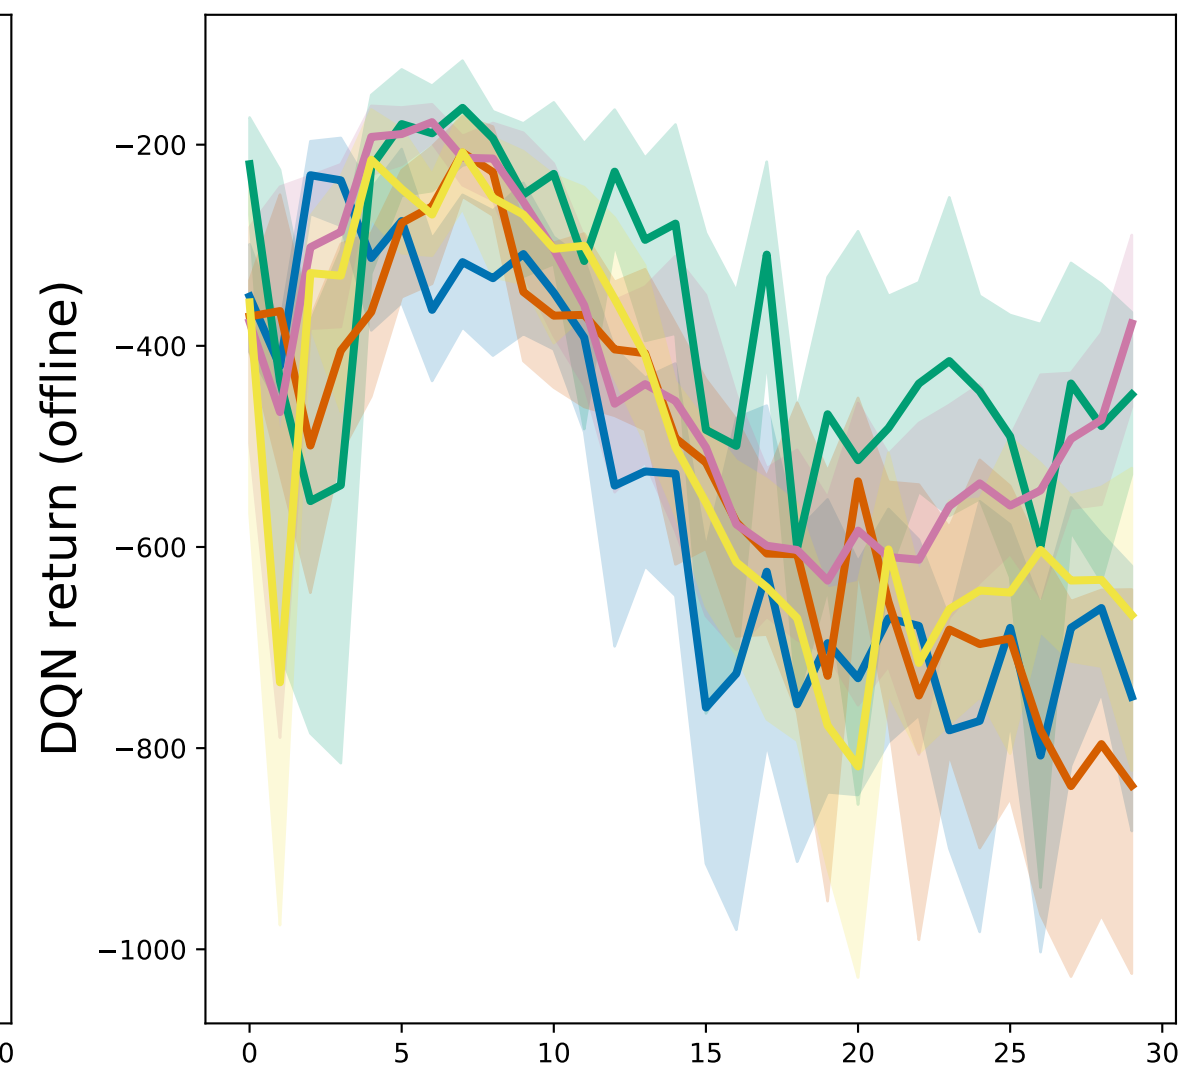

MountainCar

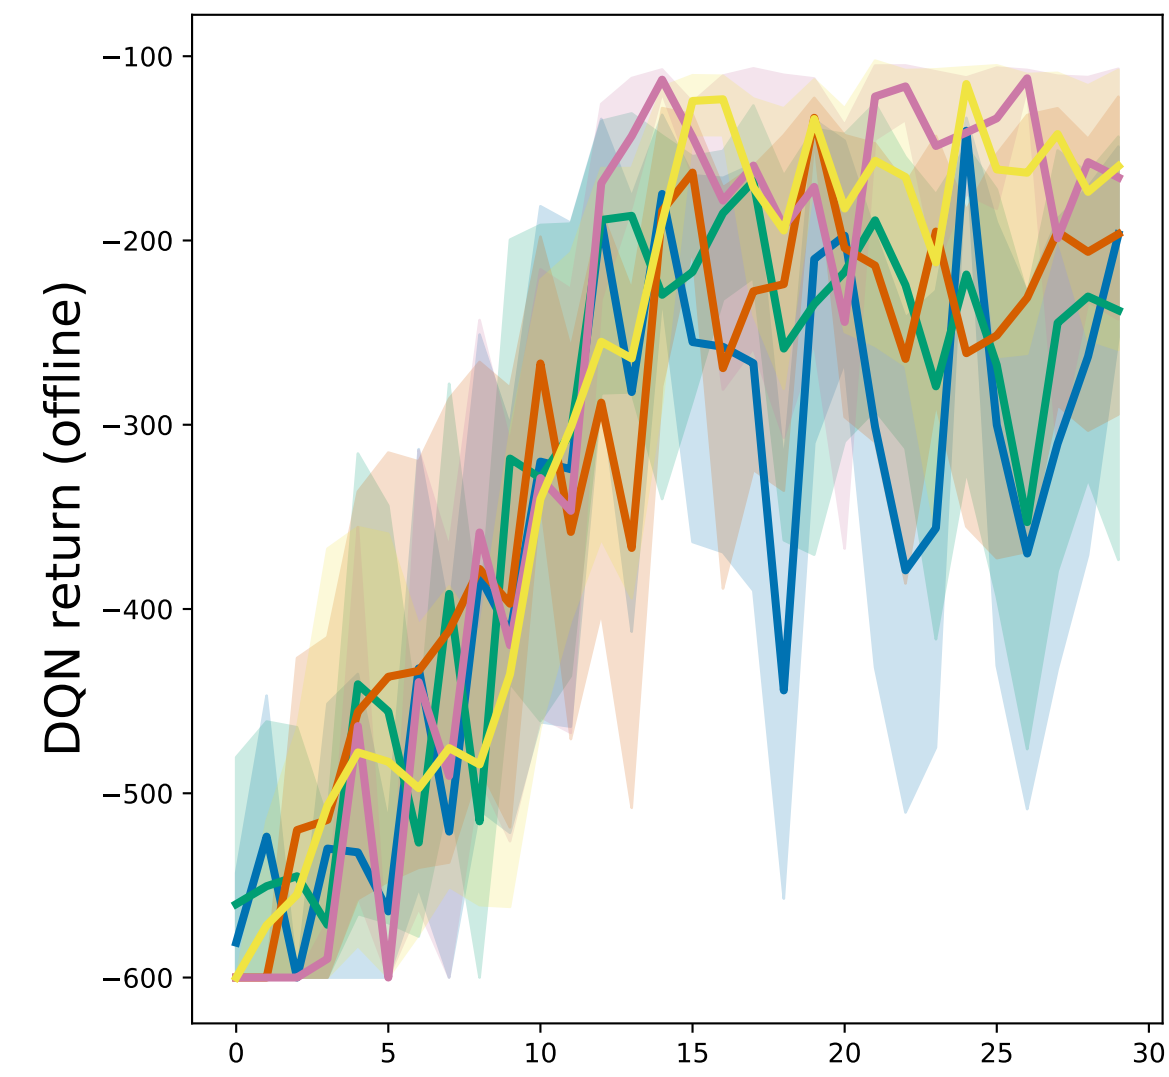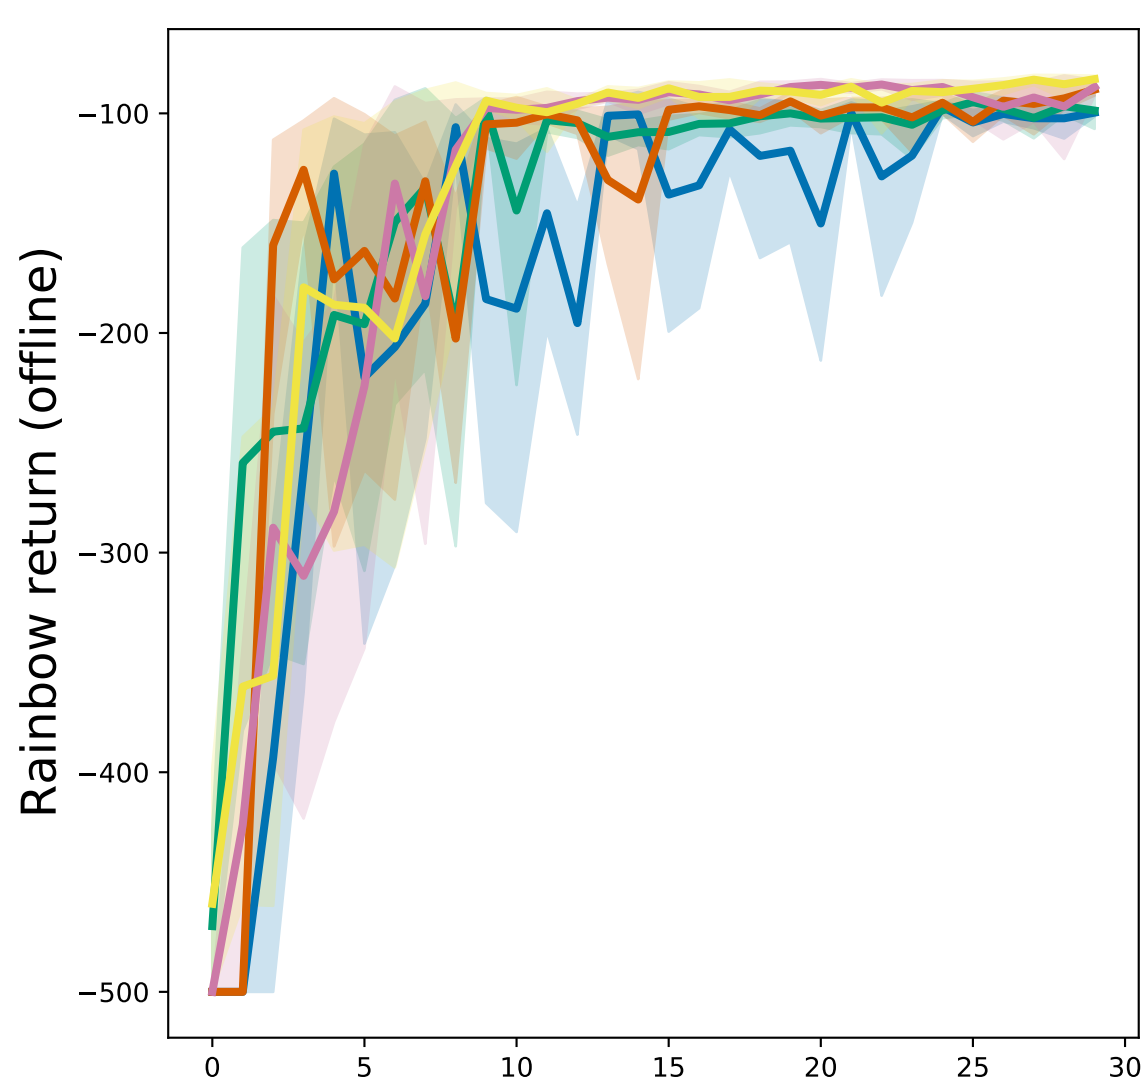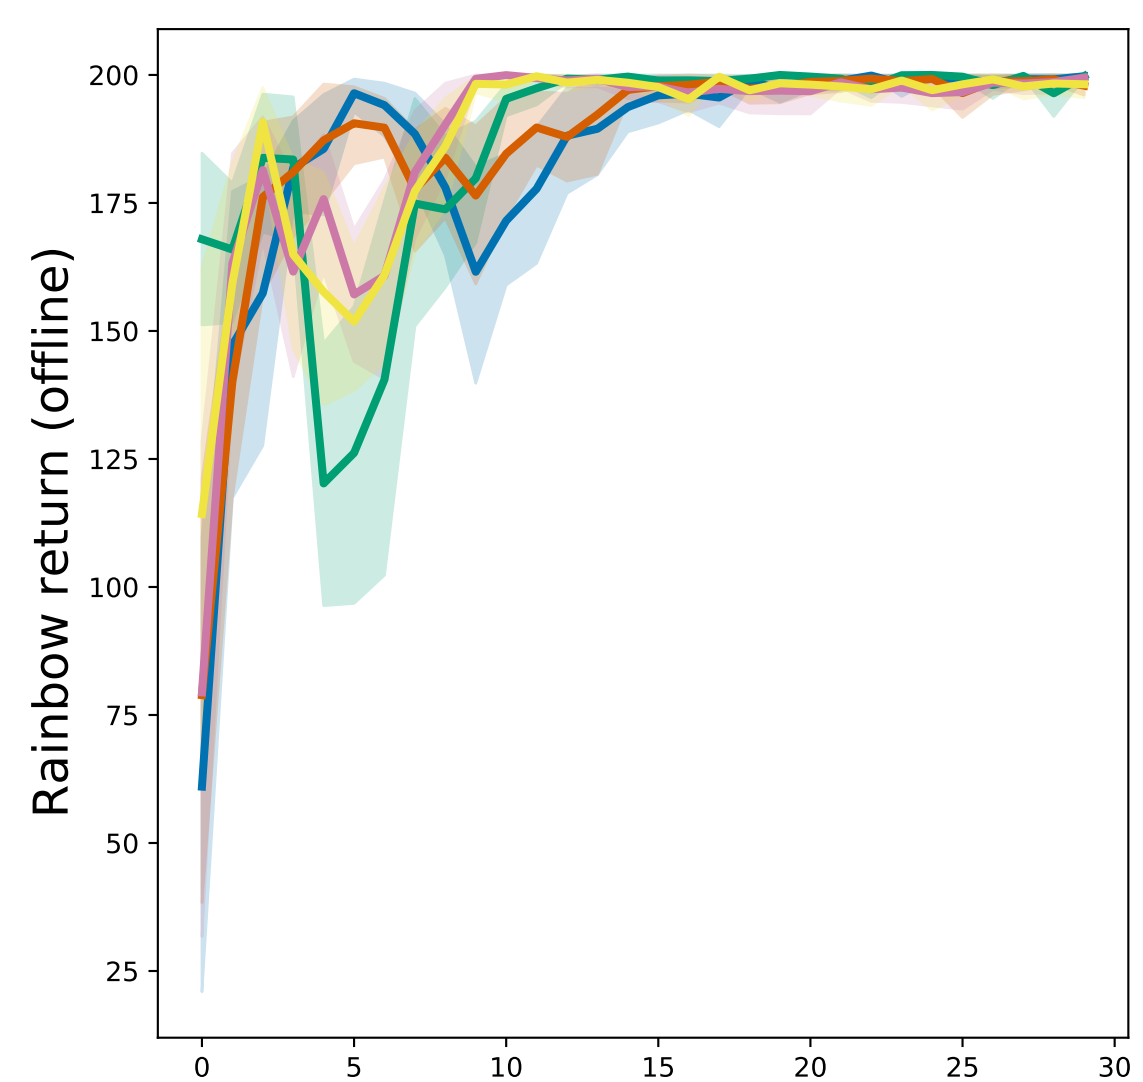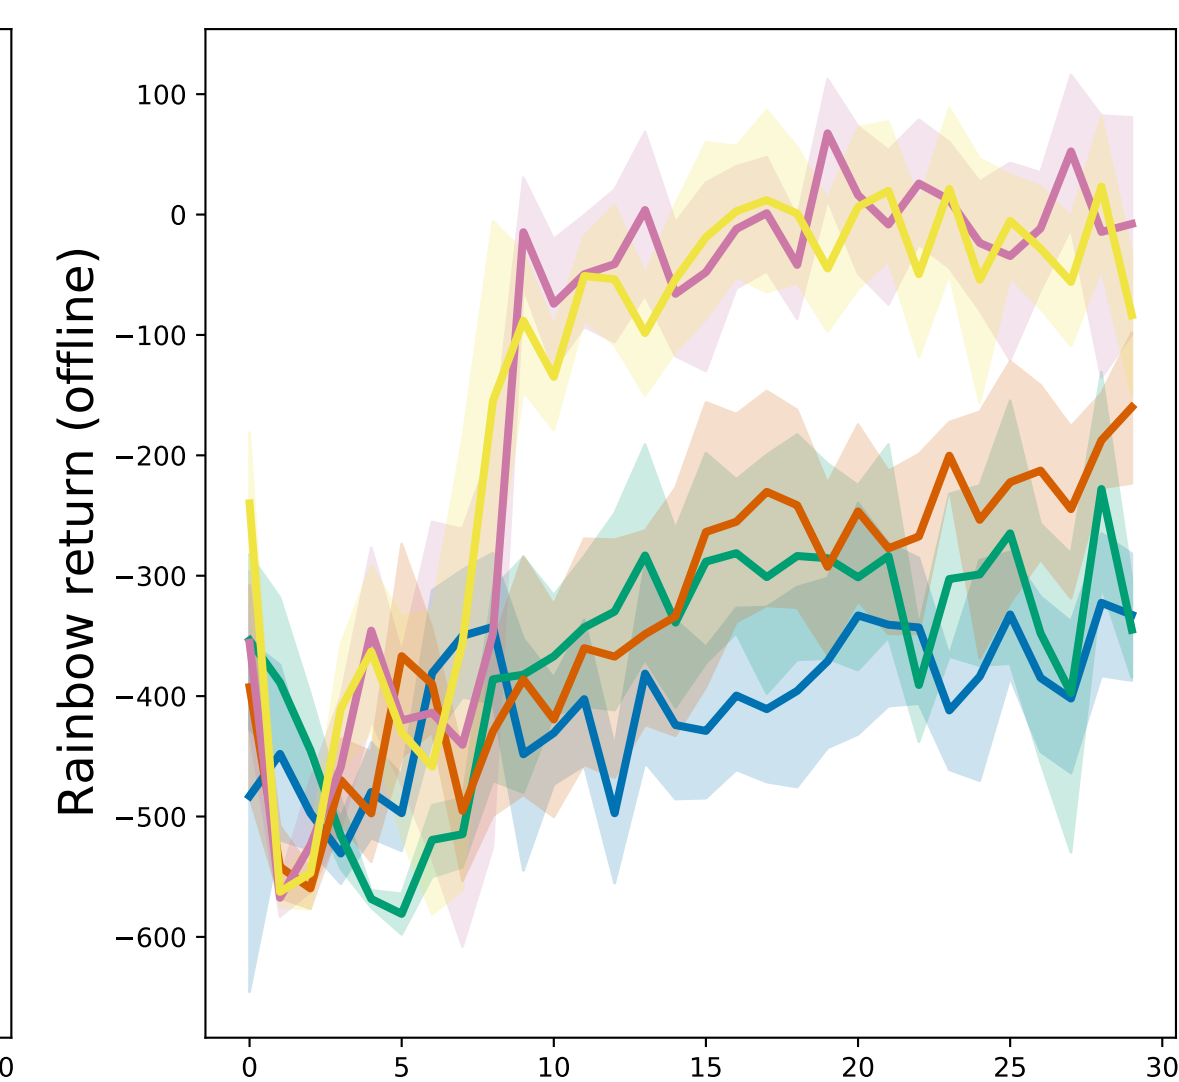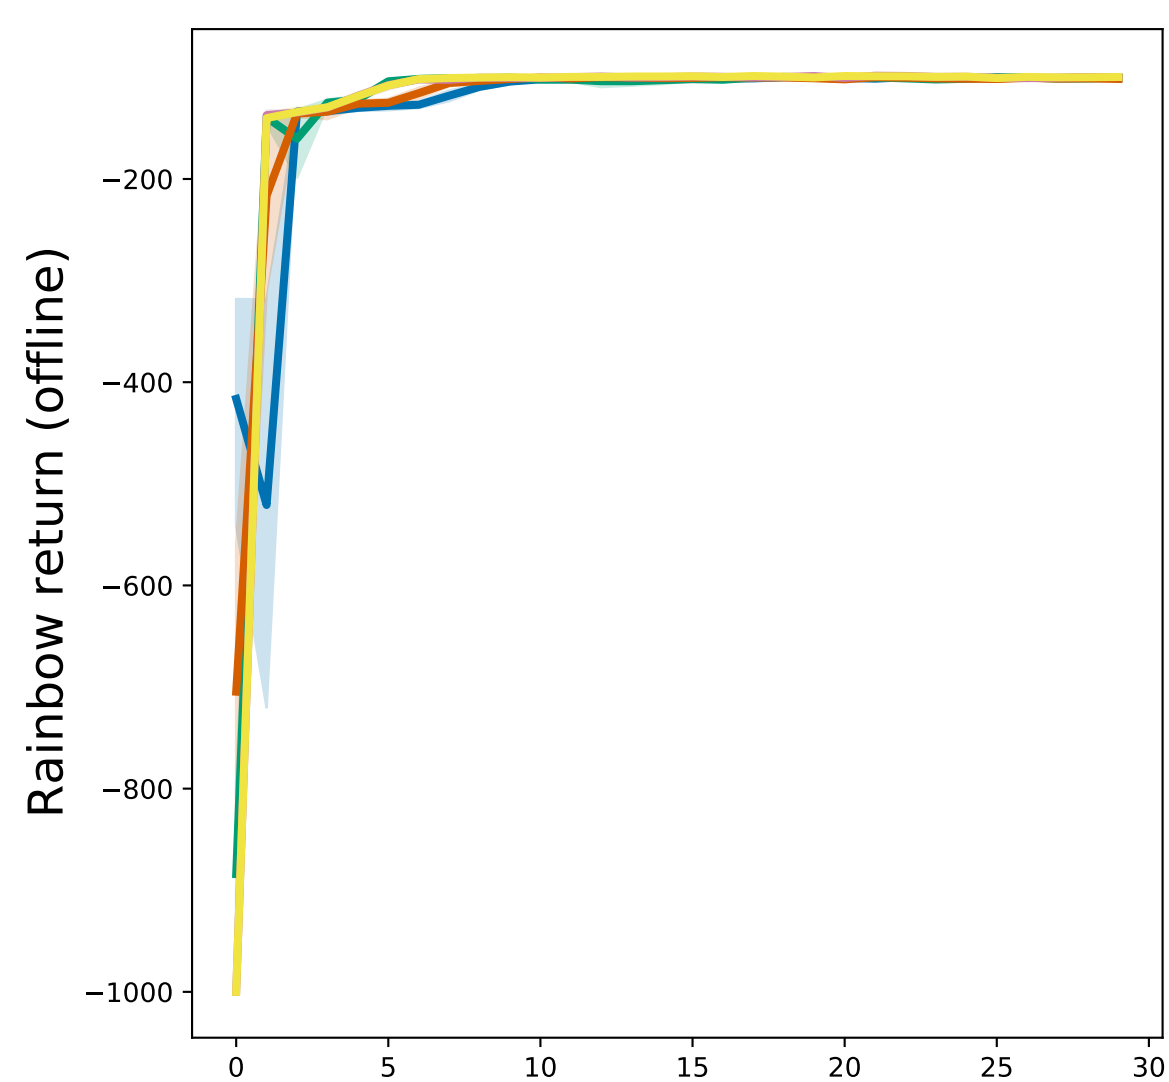

Supplement: supplementary_material [file attachment]

Acrobot

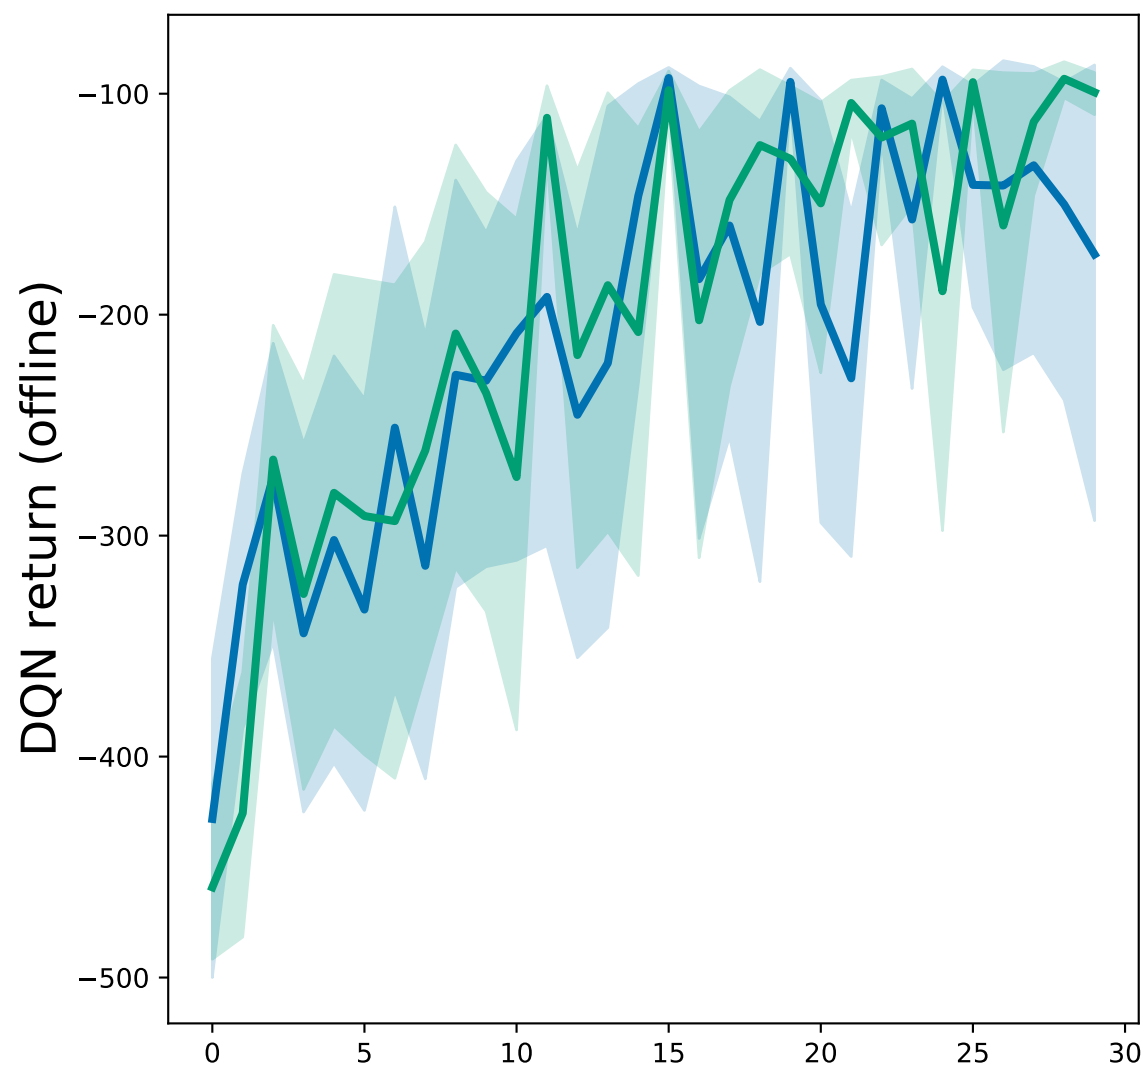

CartPole

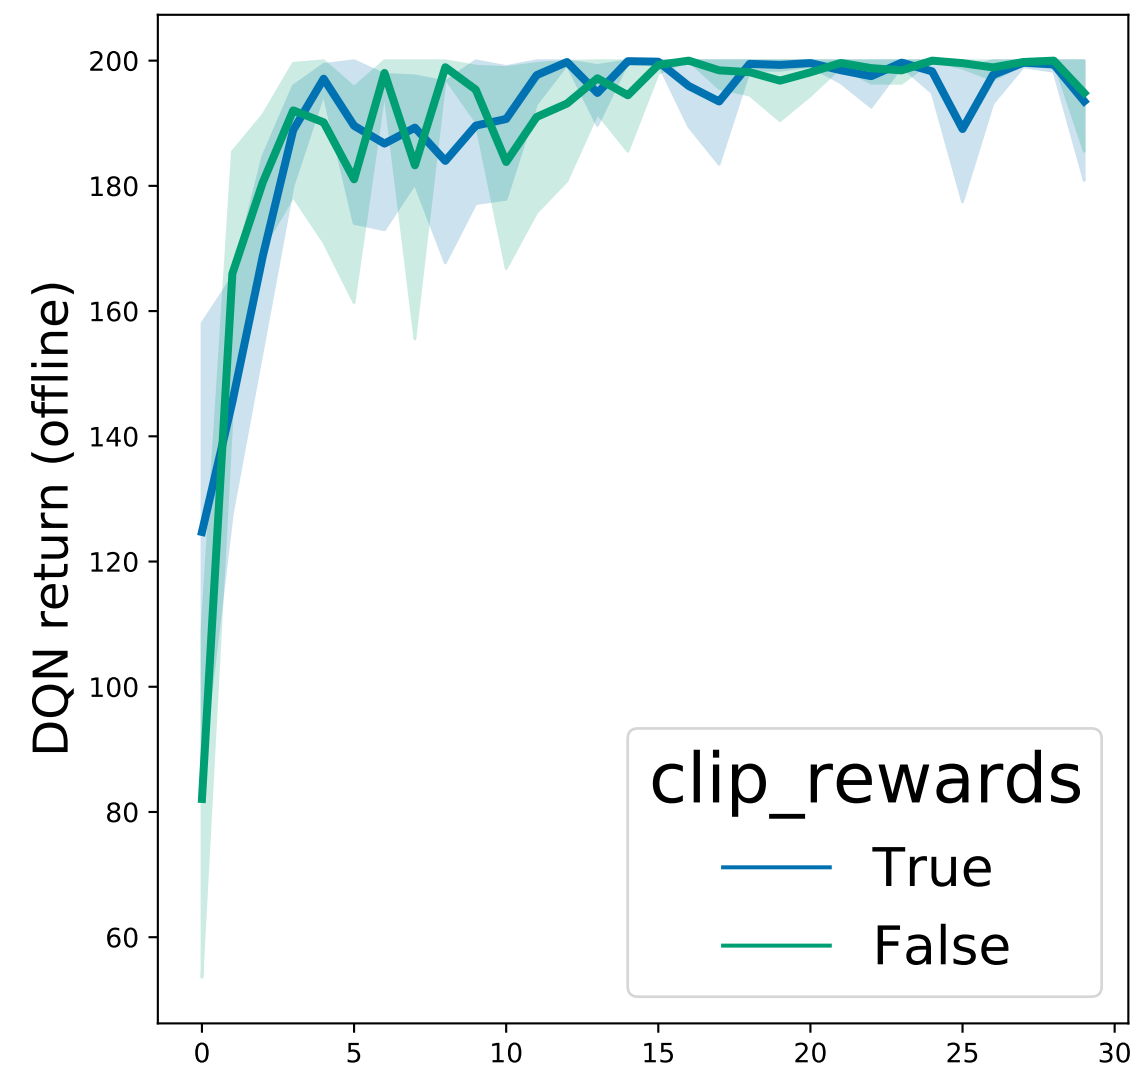

LunarLander

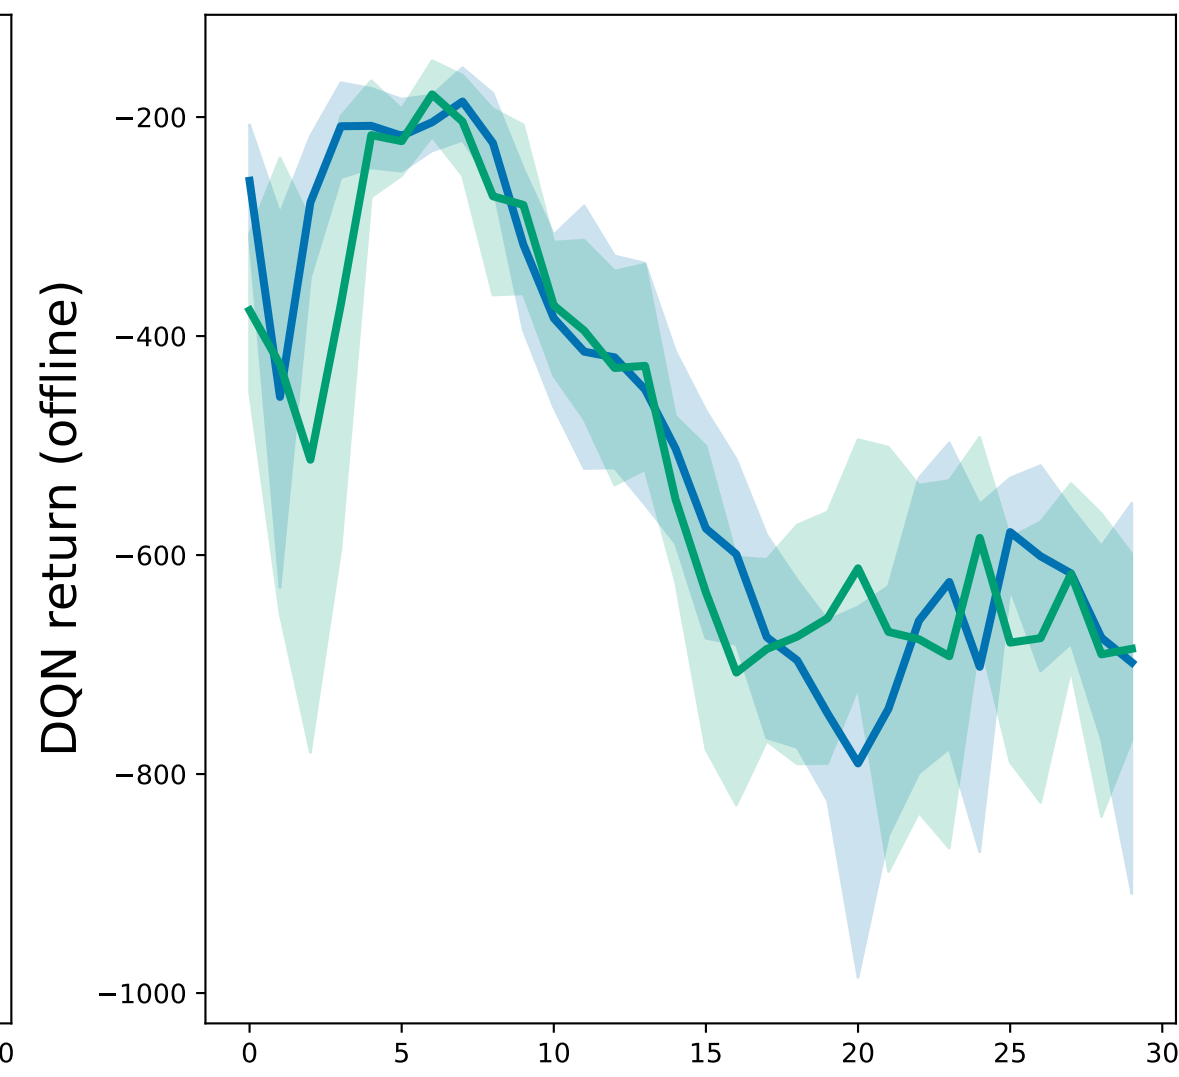

MountainCar

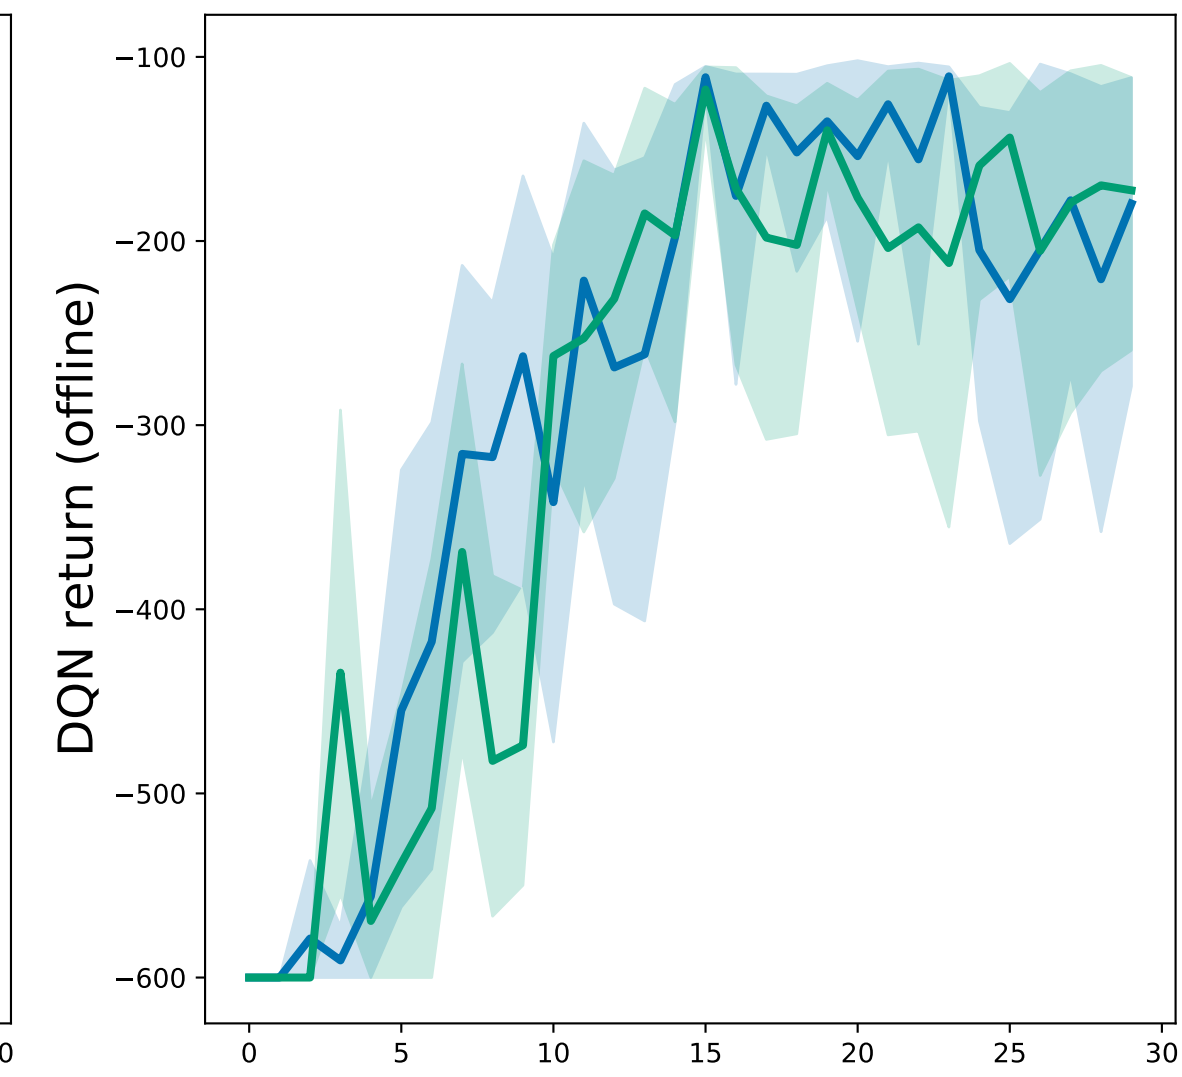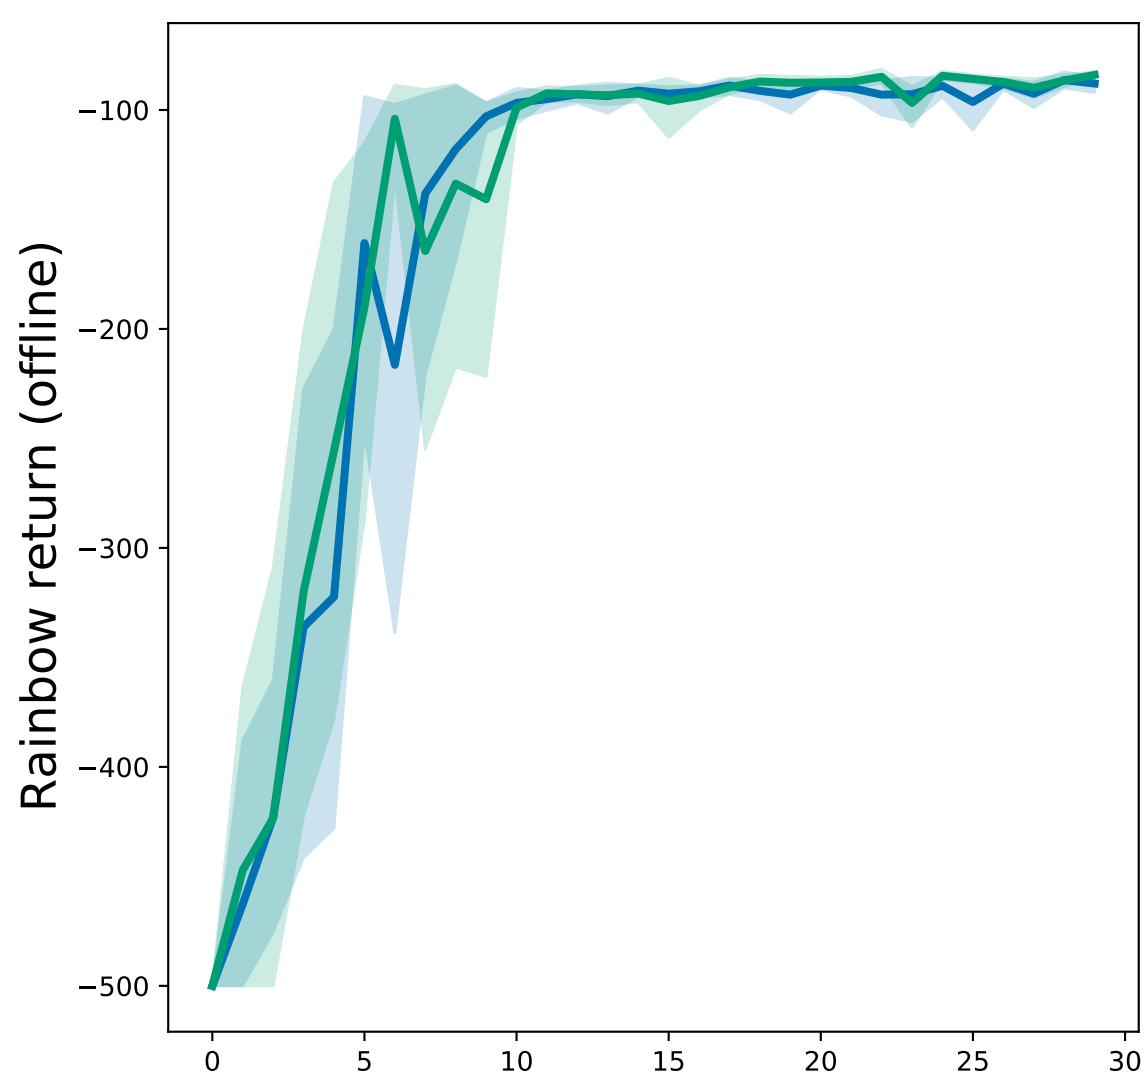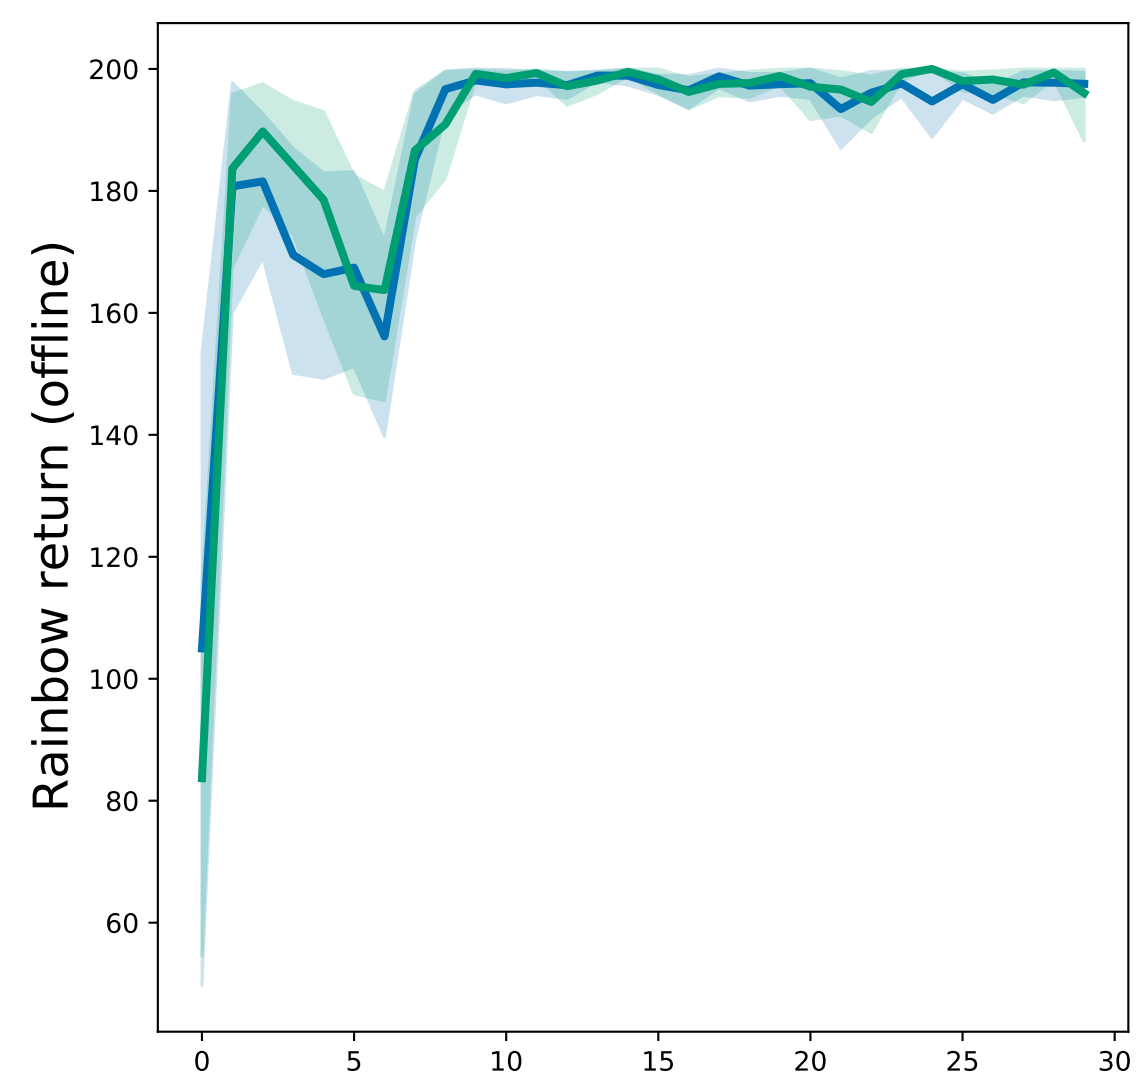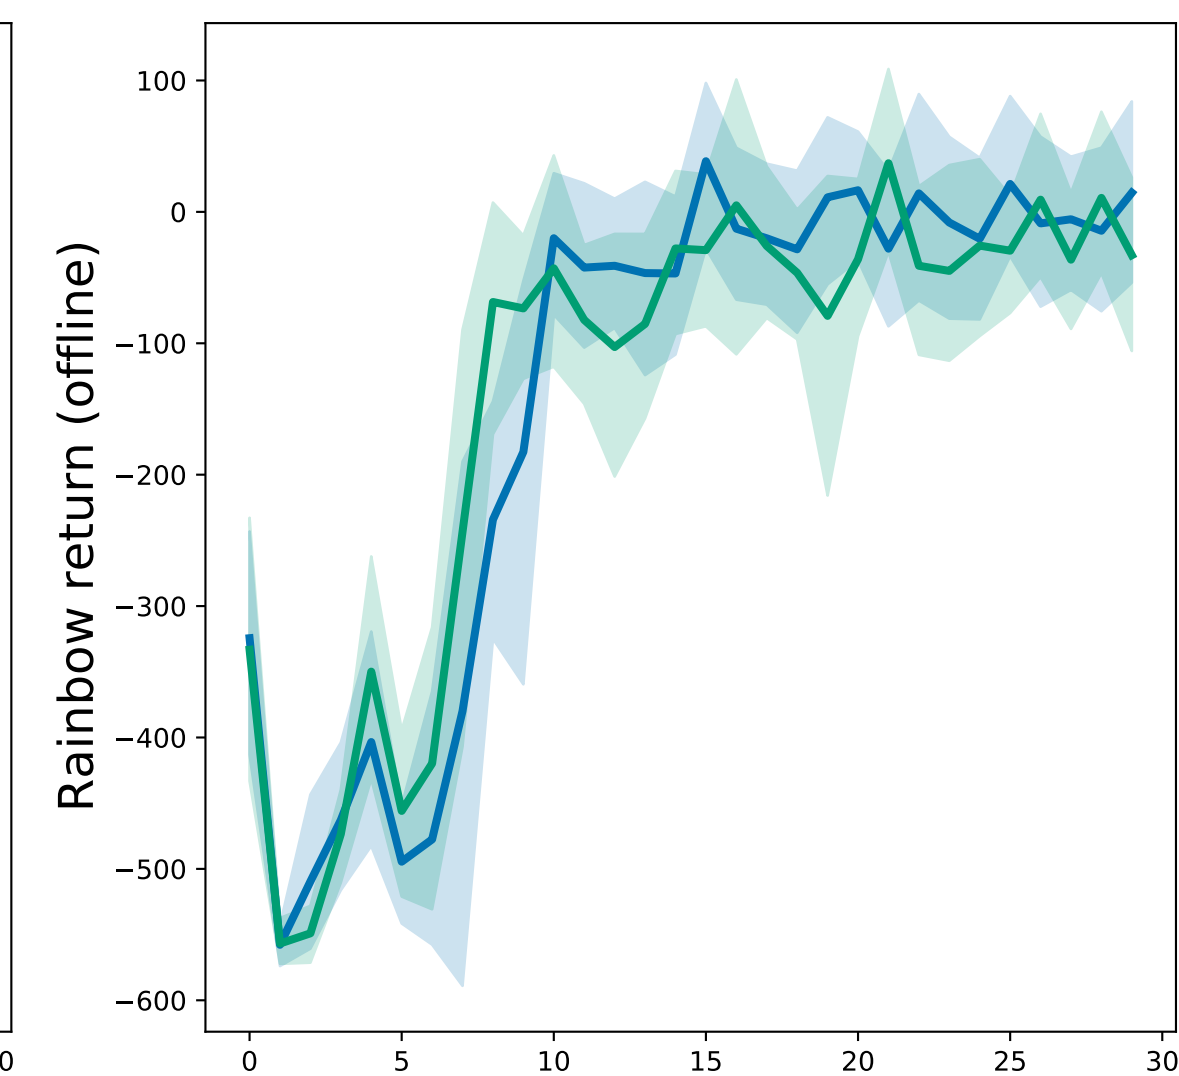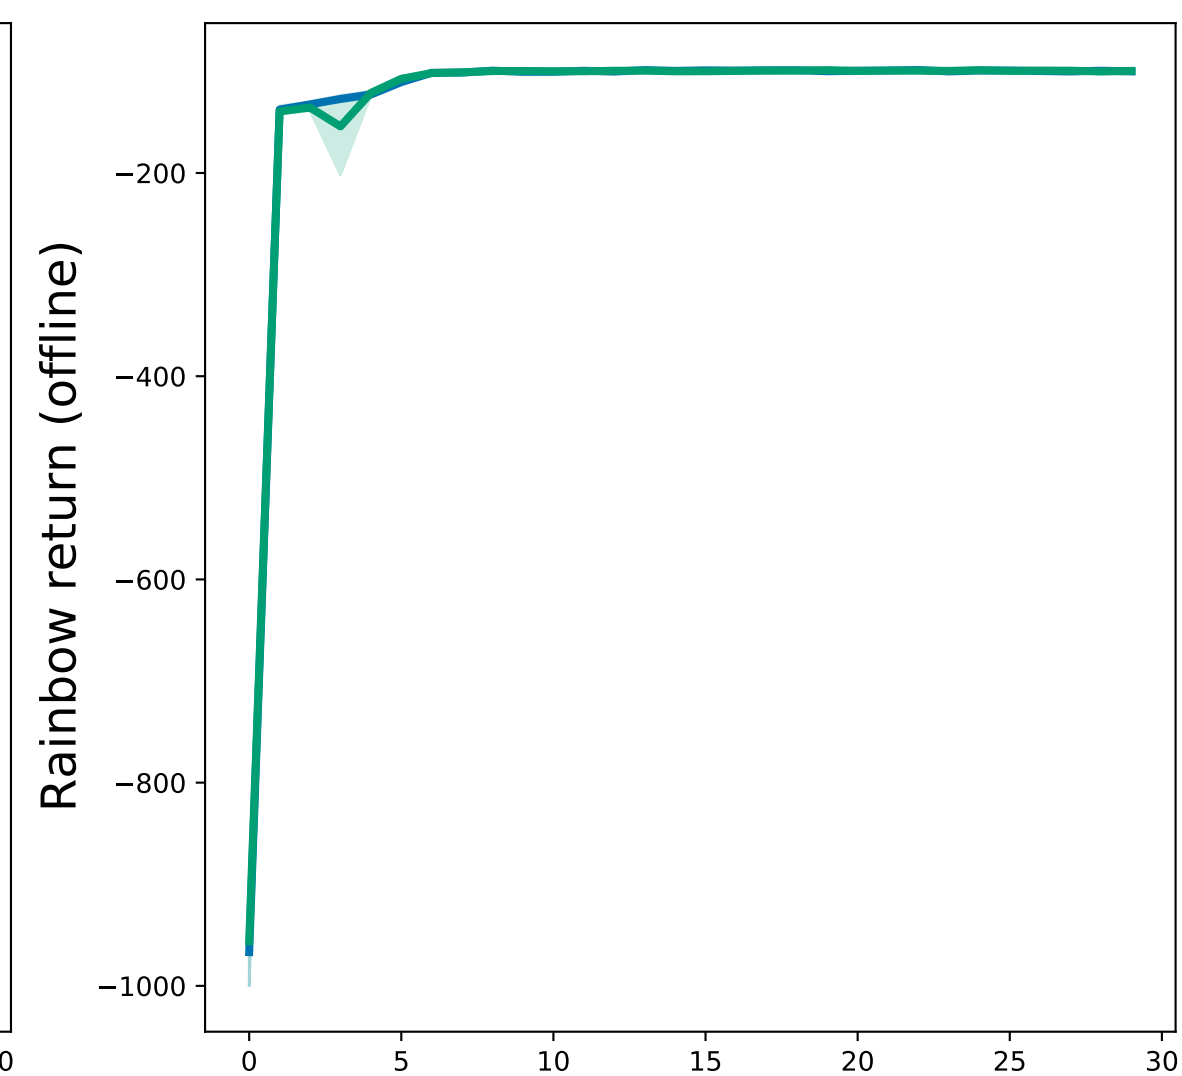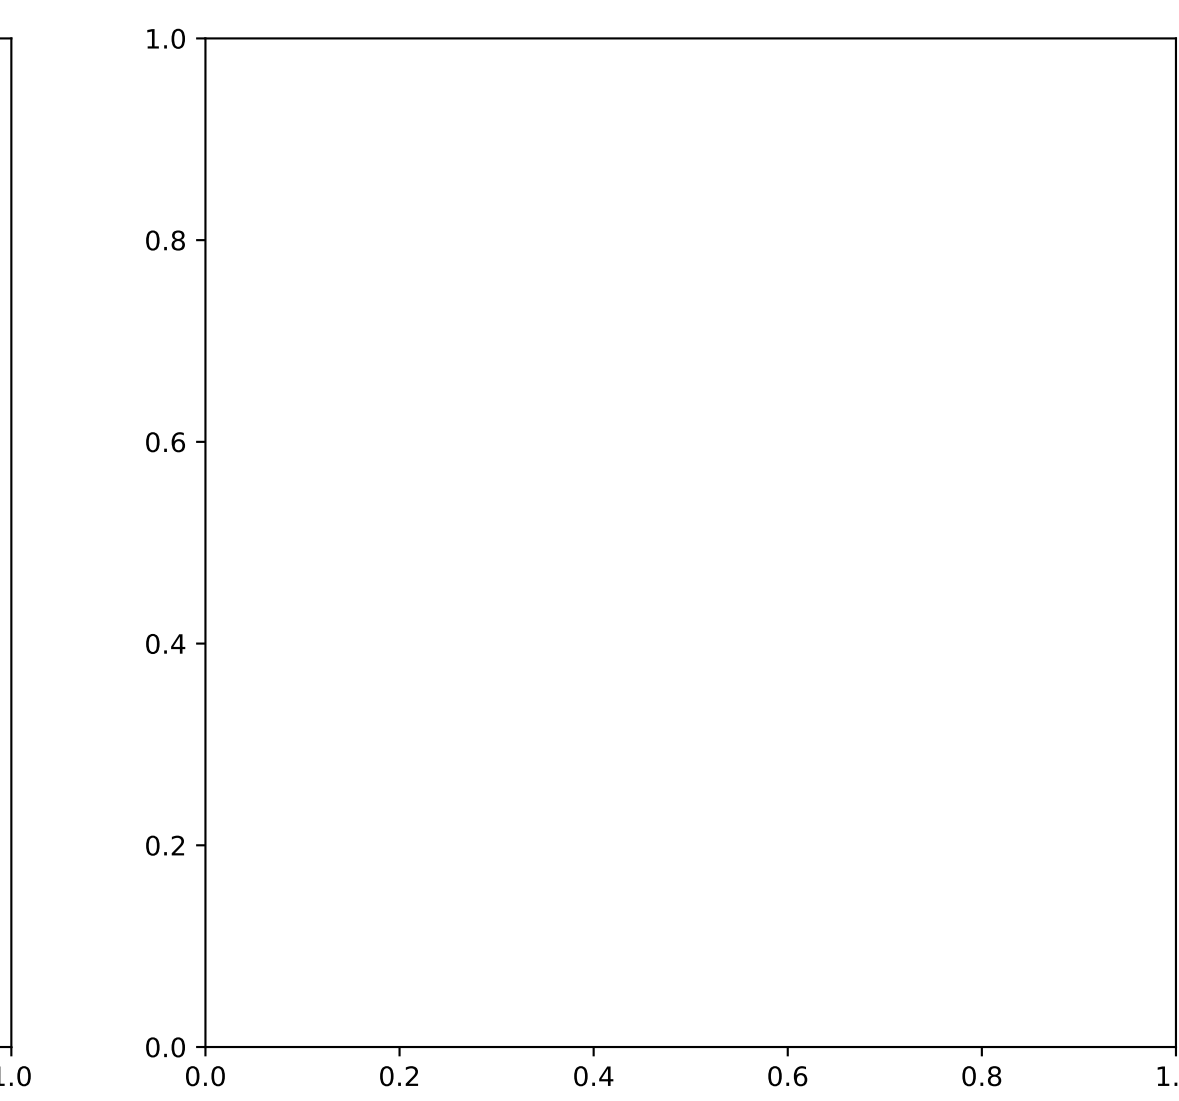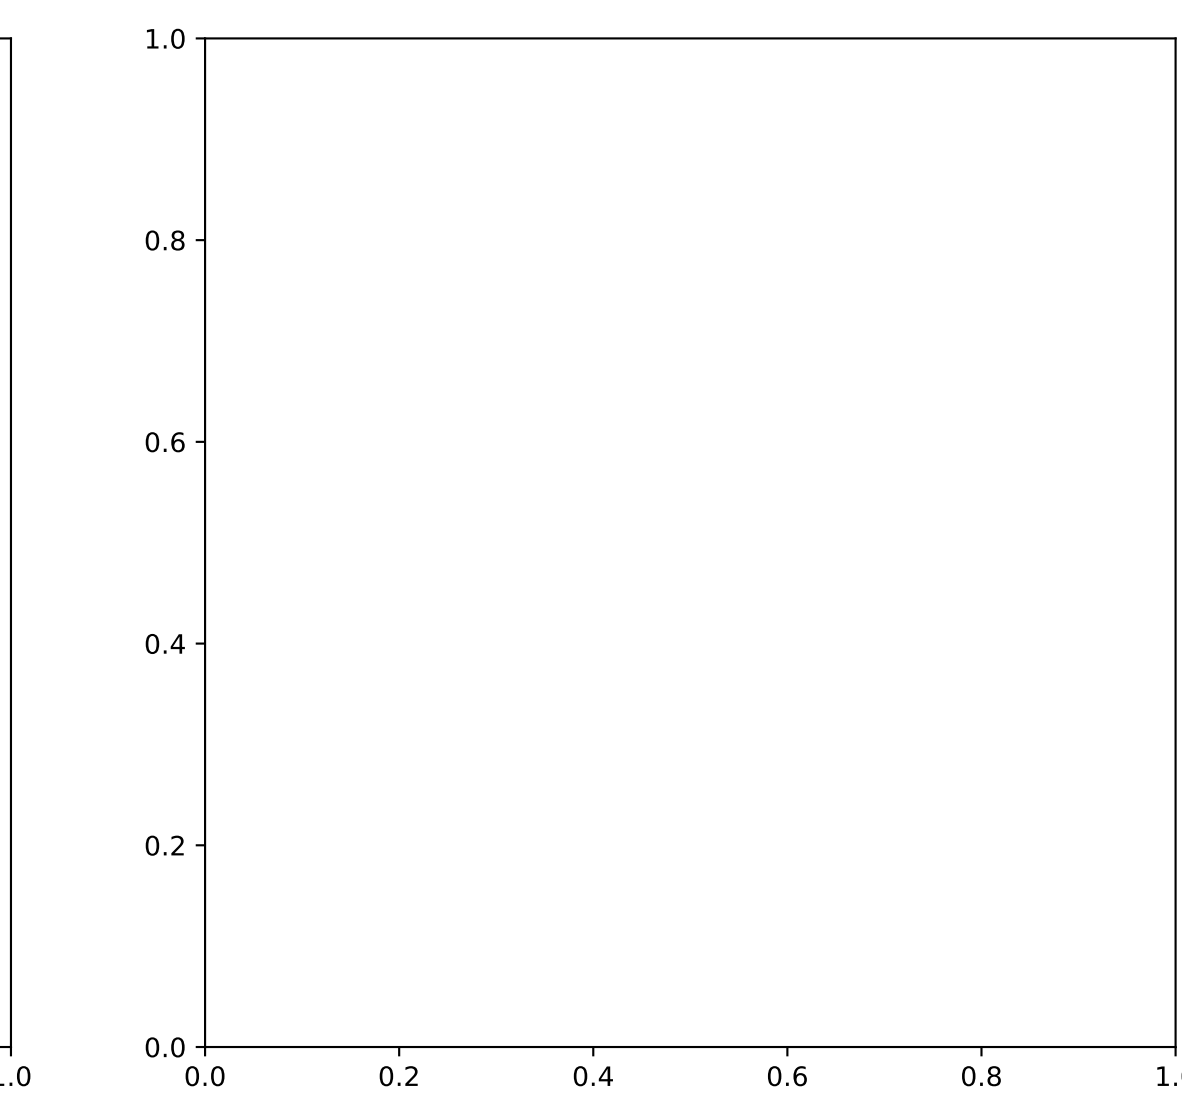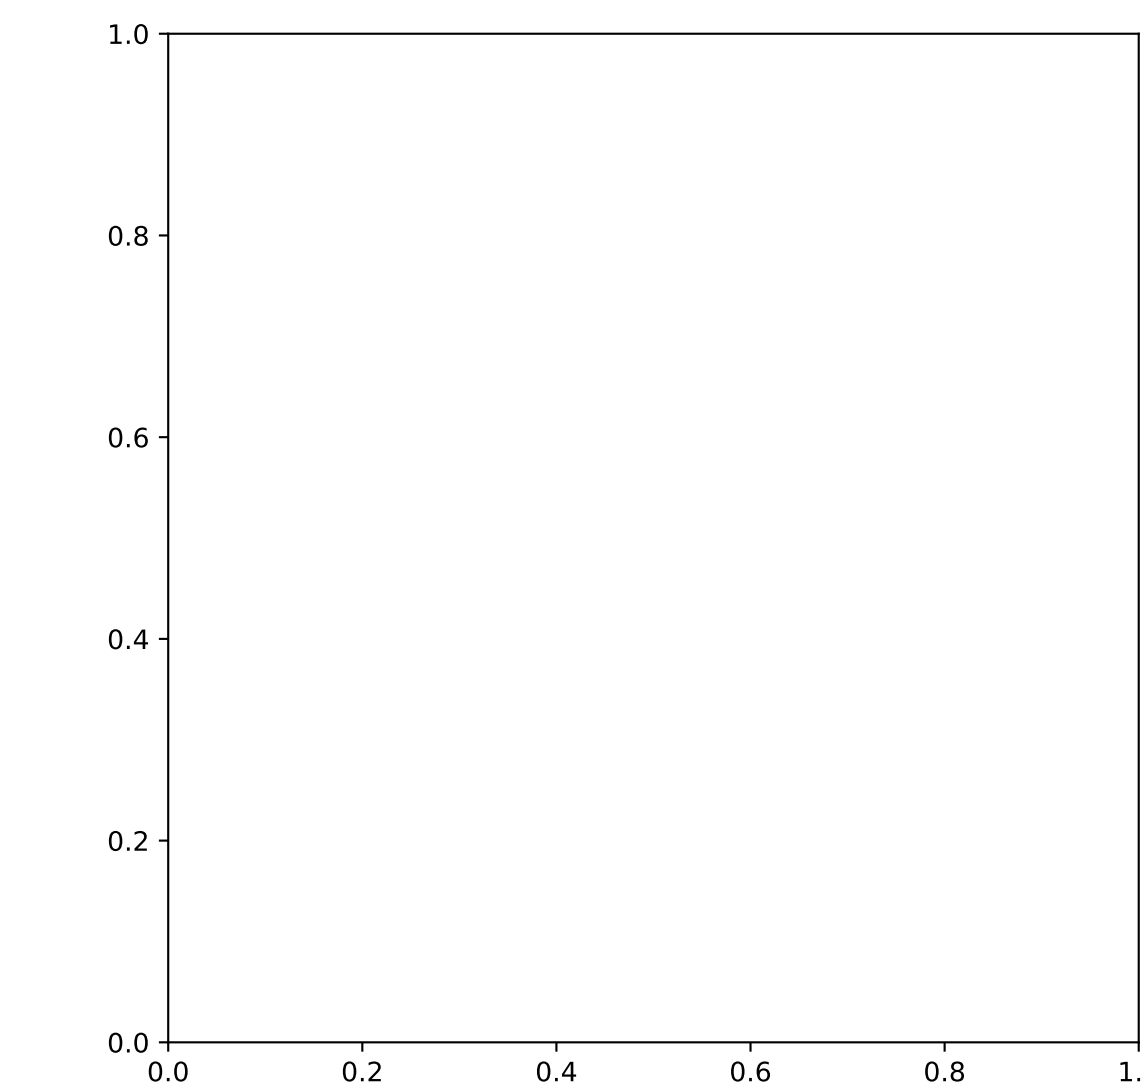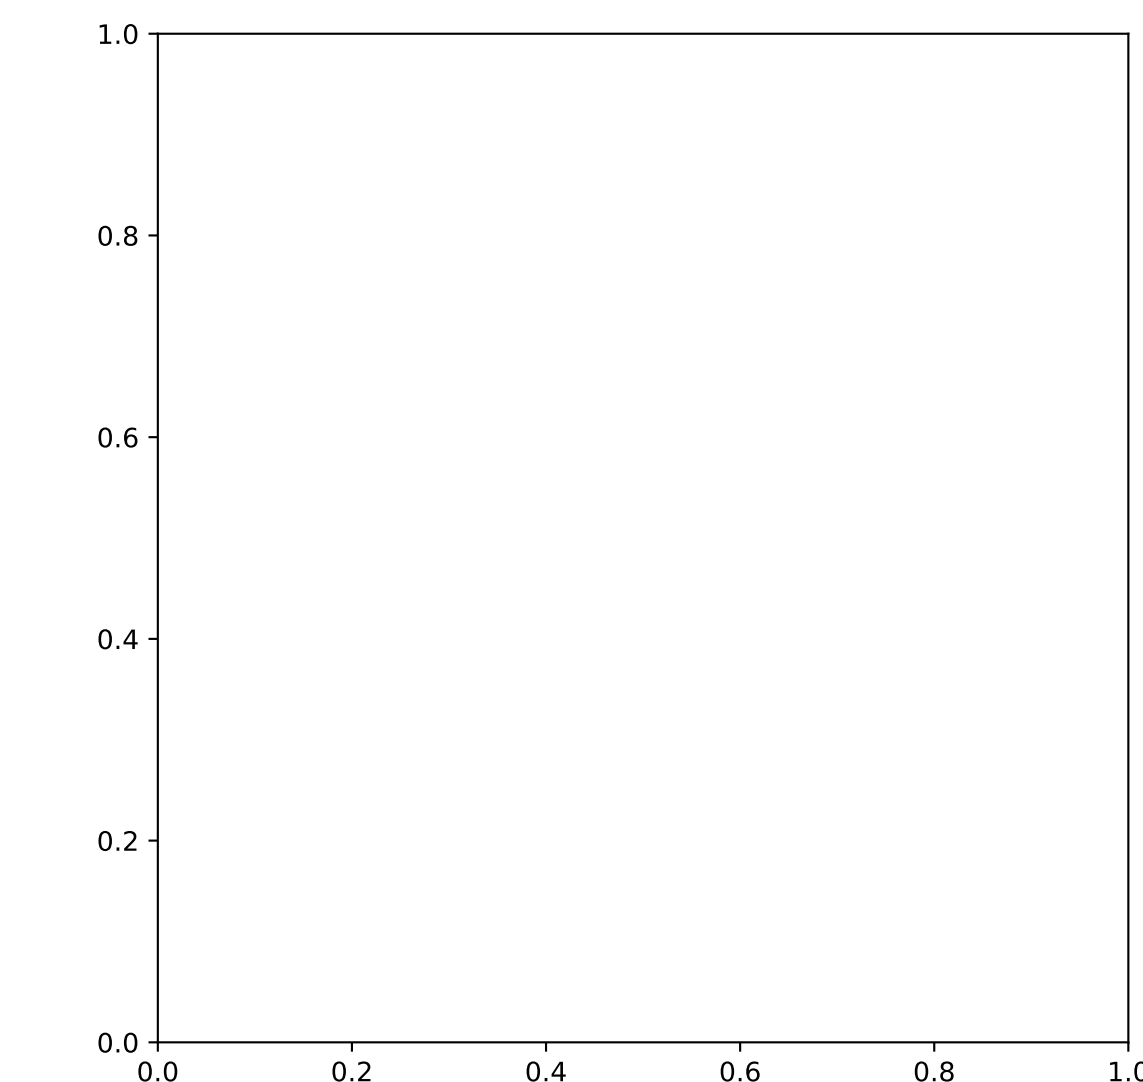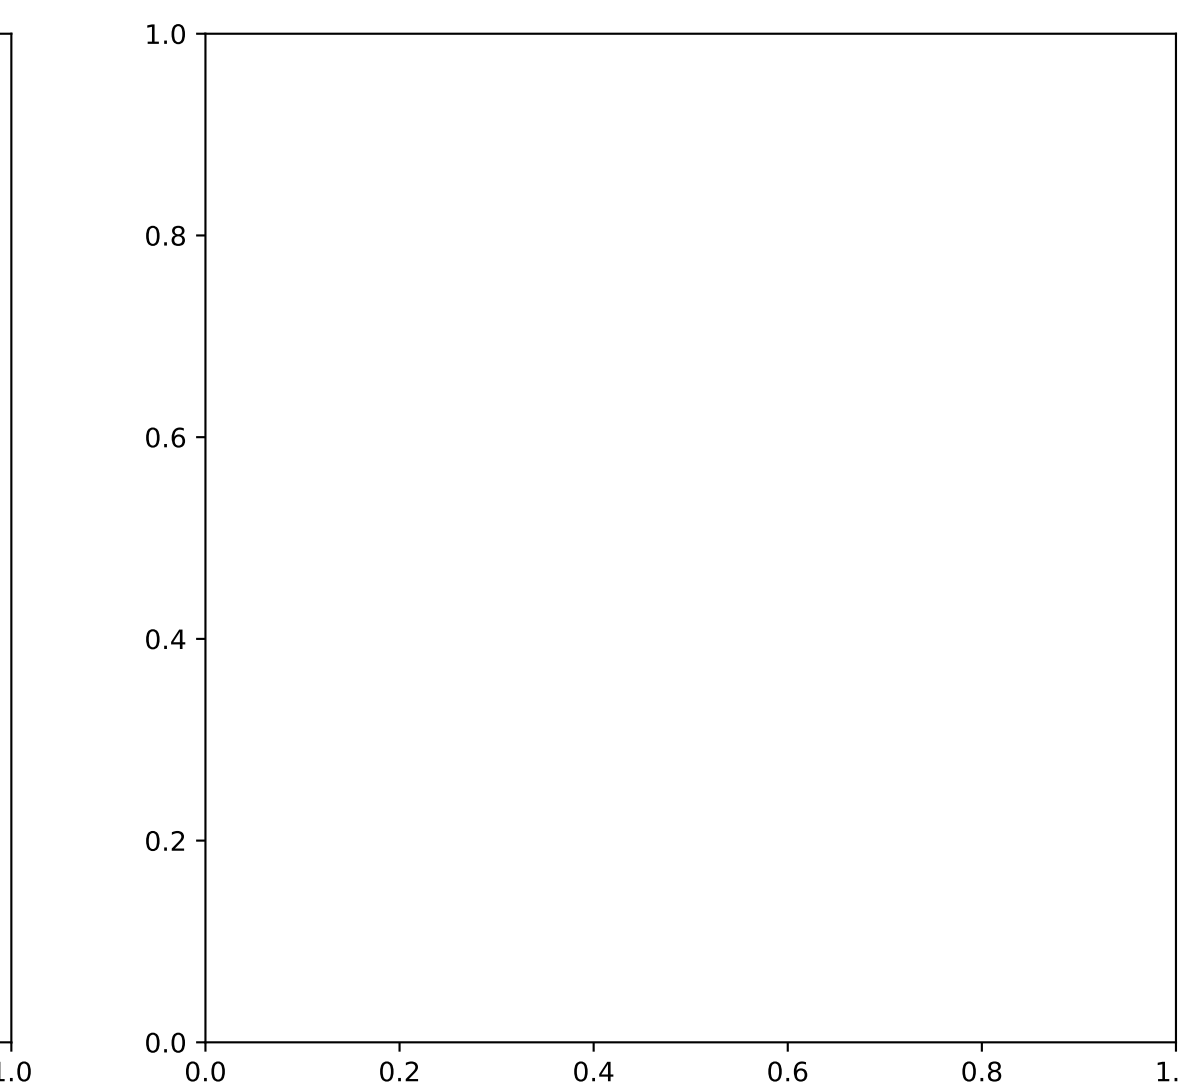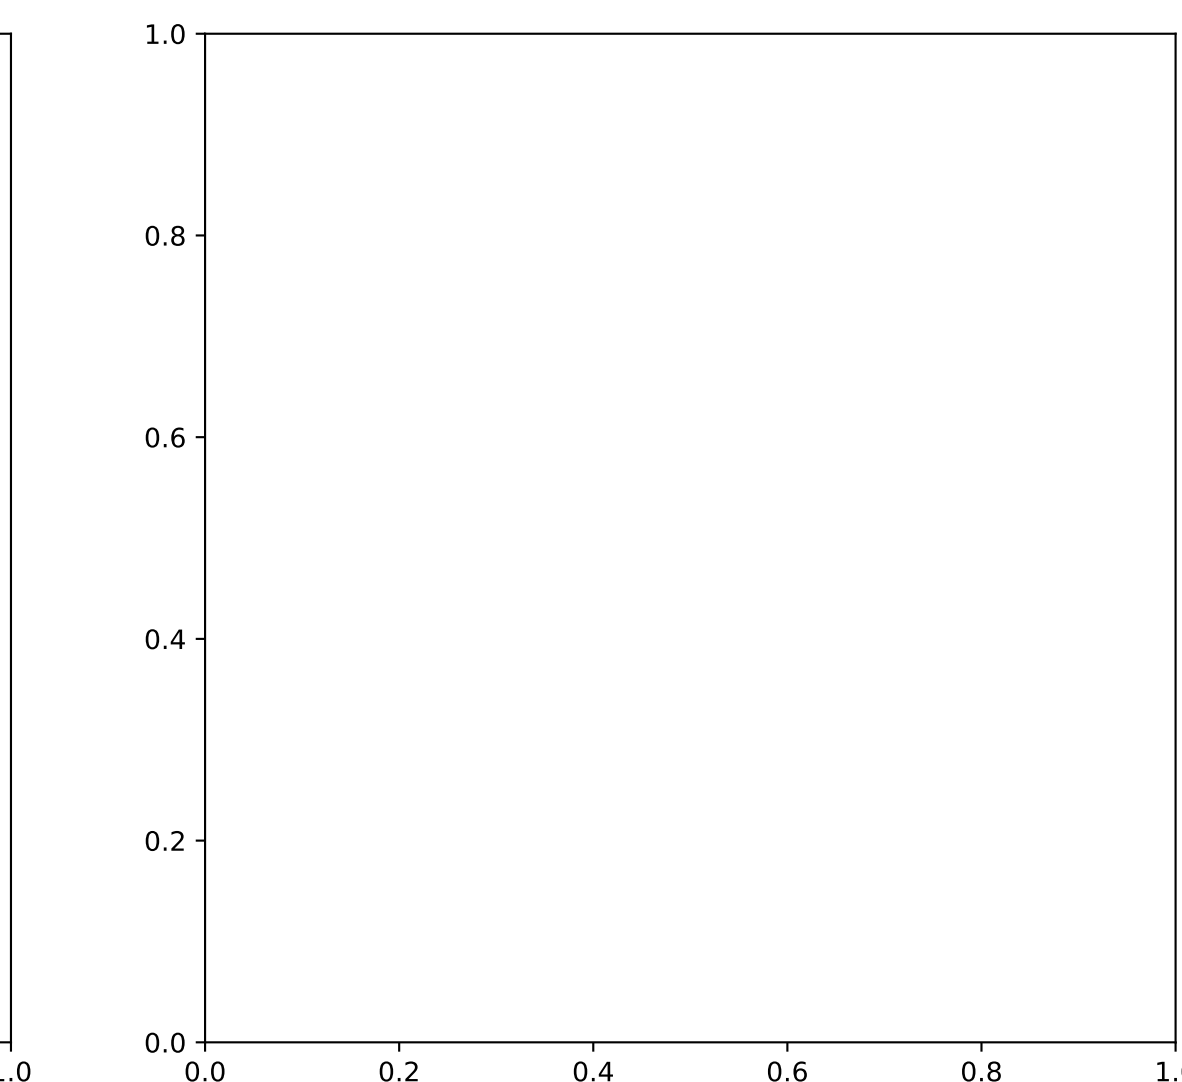

Supplement: supplementary_material [file attachment]

Acrobot

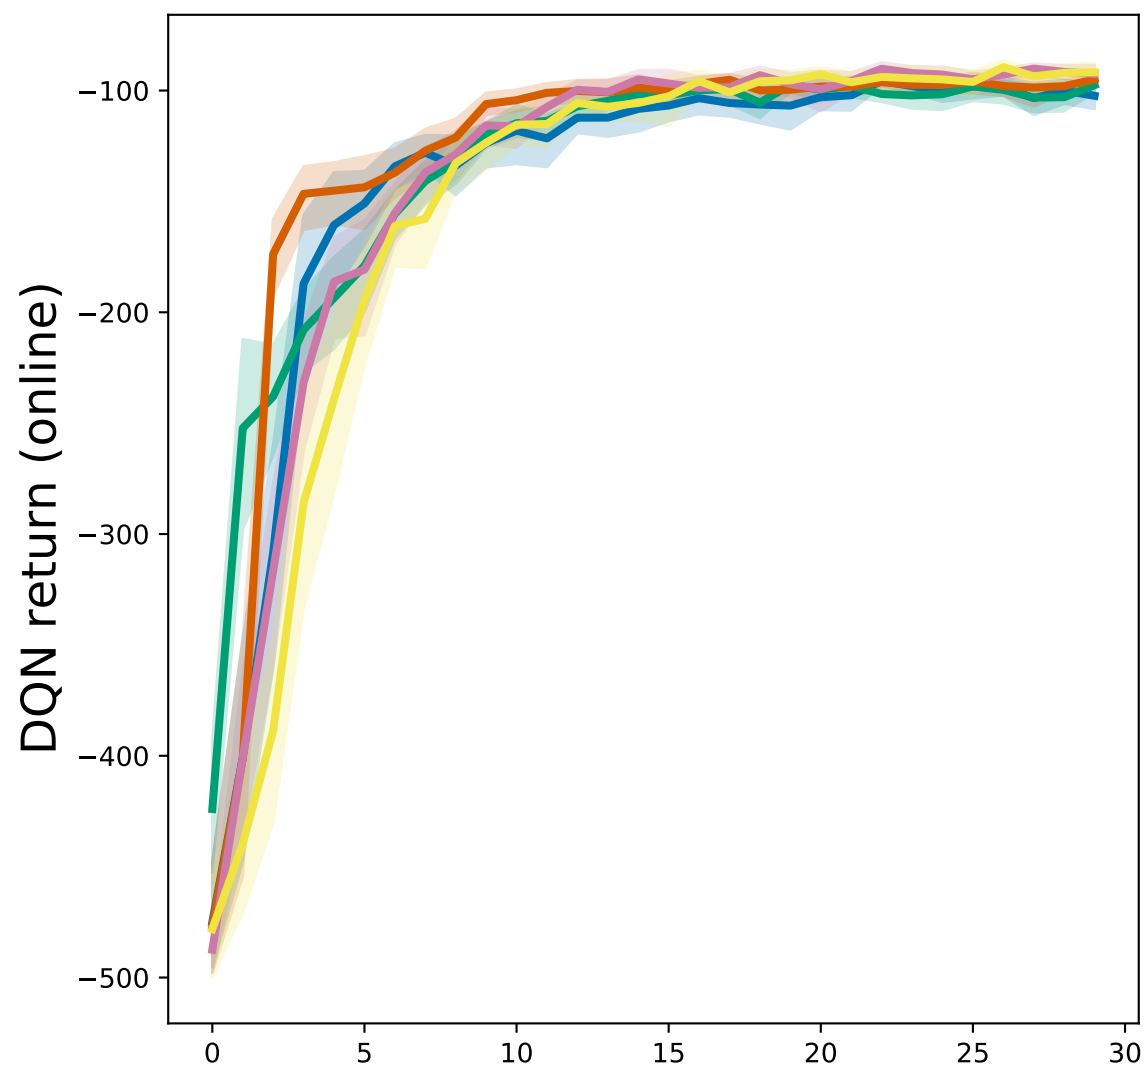

CartPole

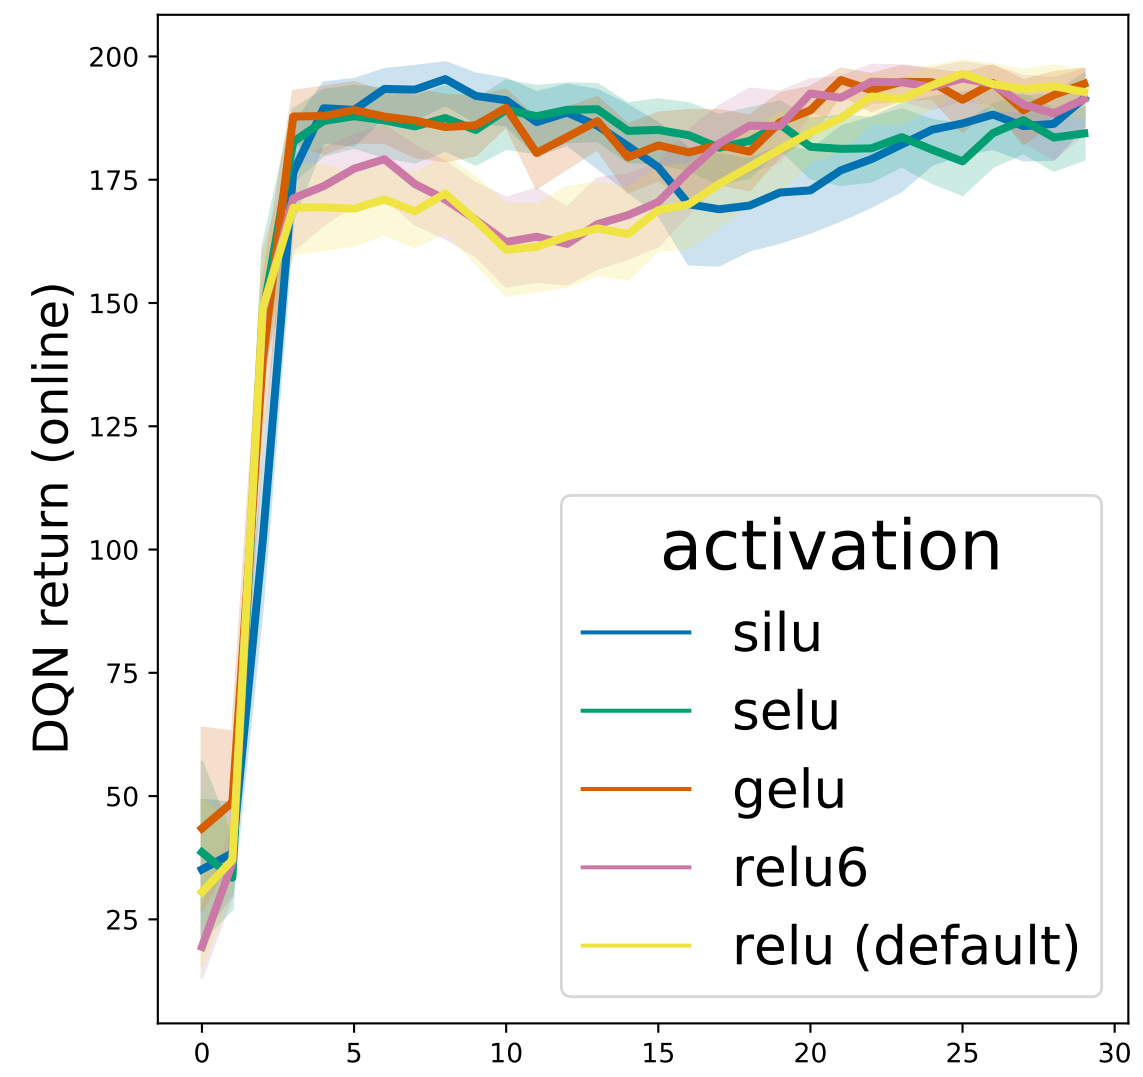

LunarLander

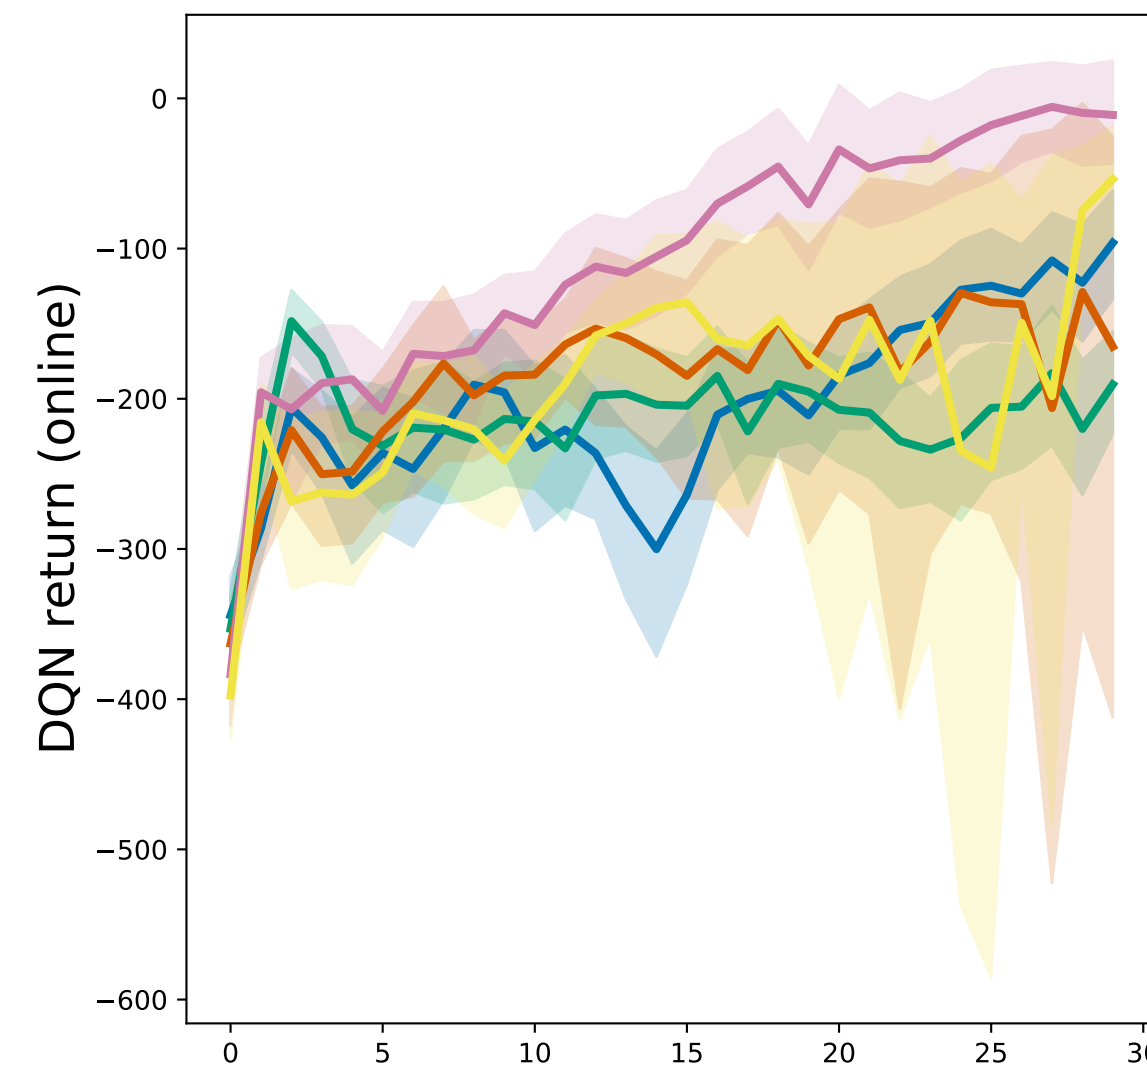

MountainCar

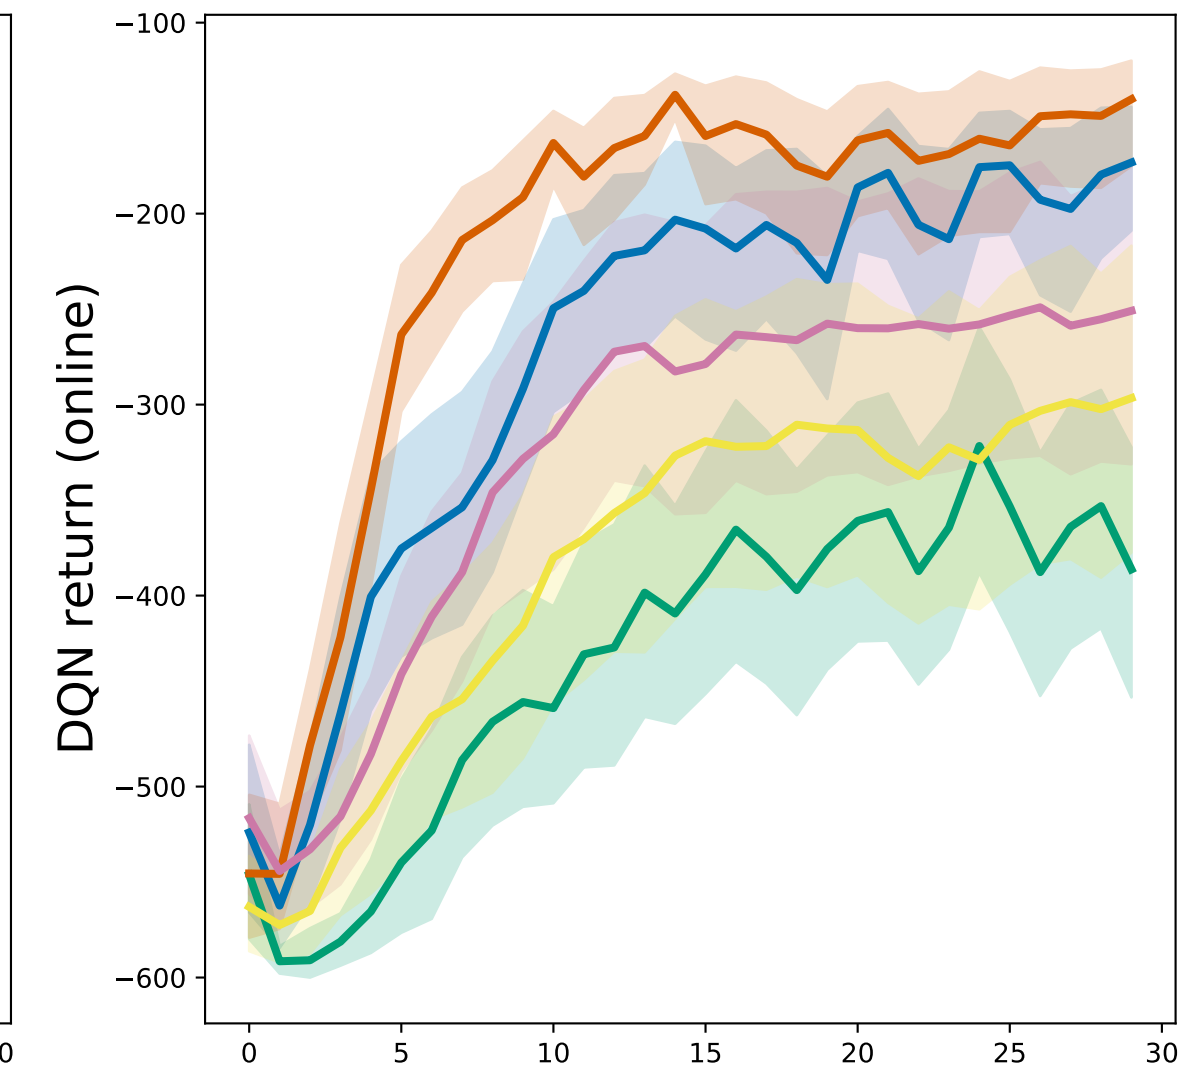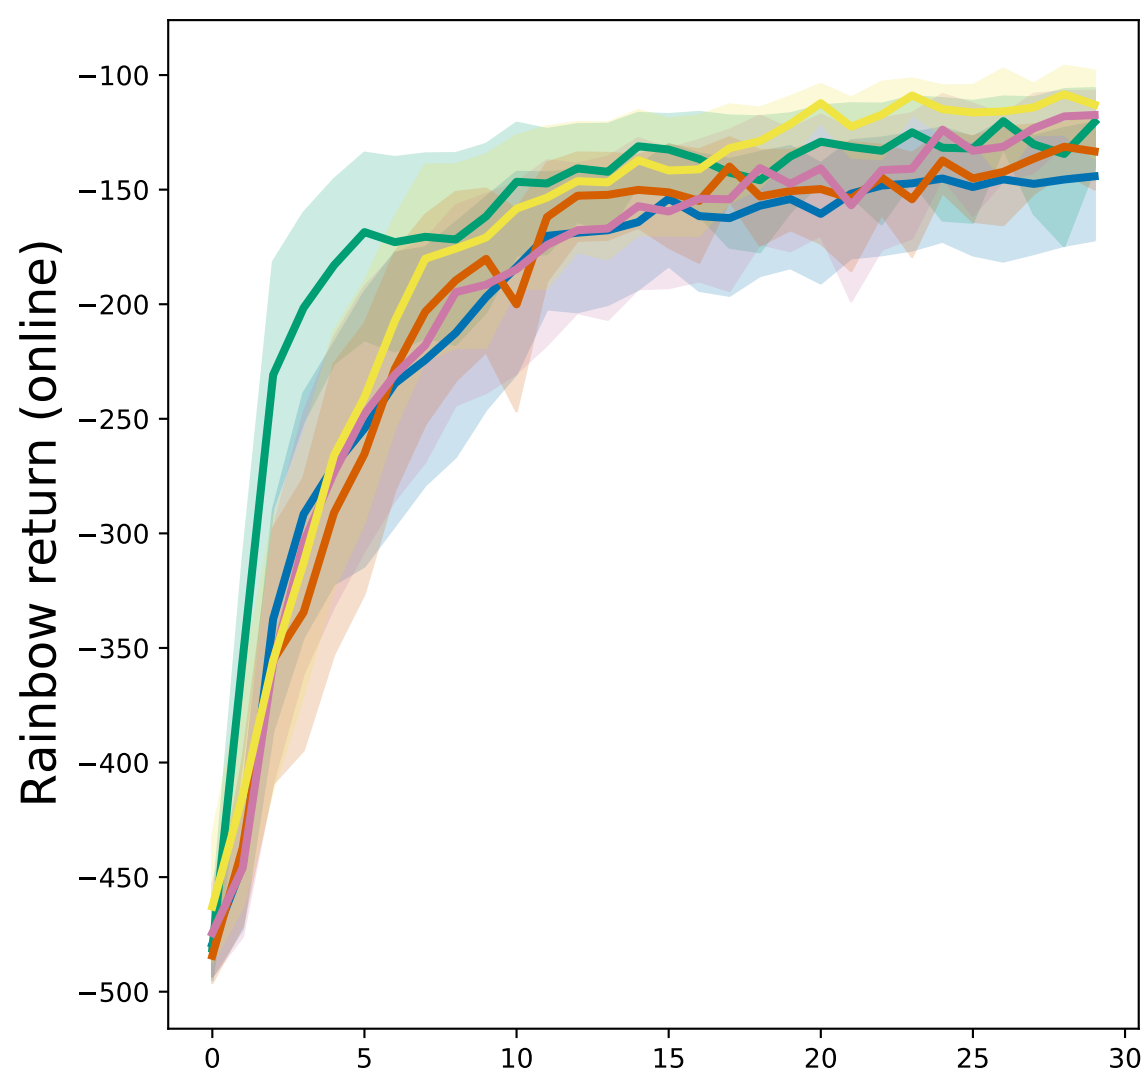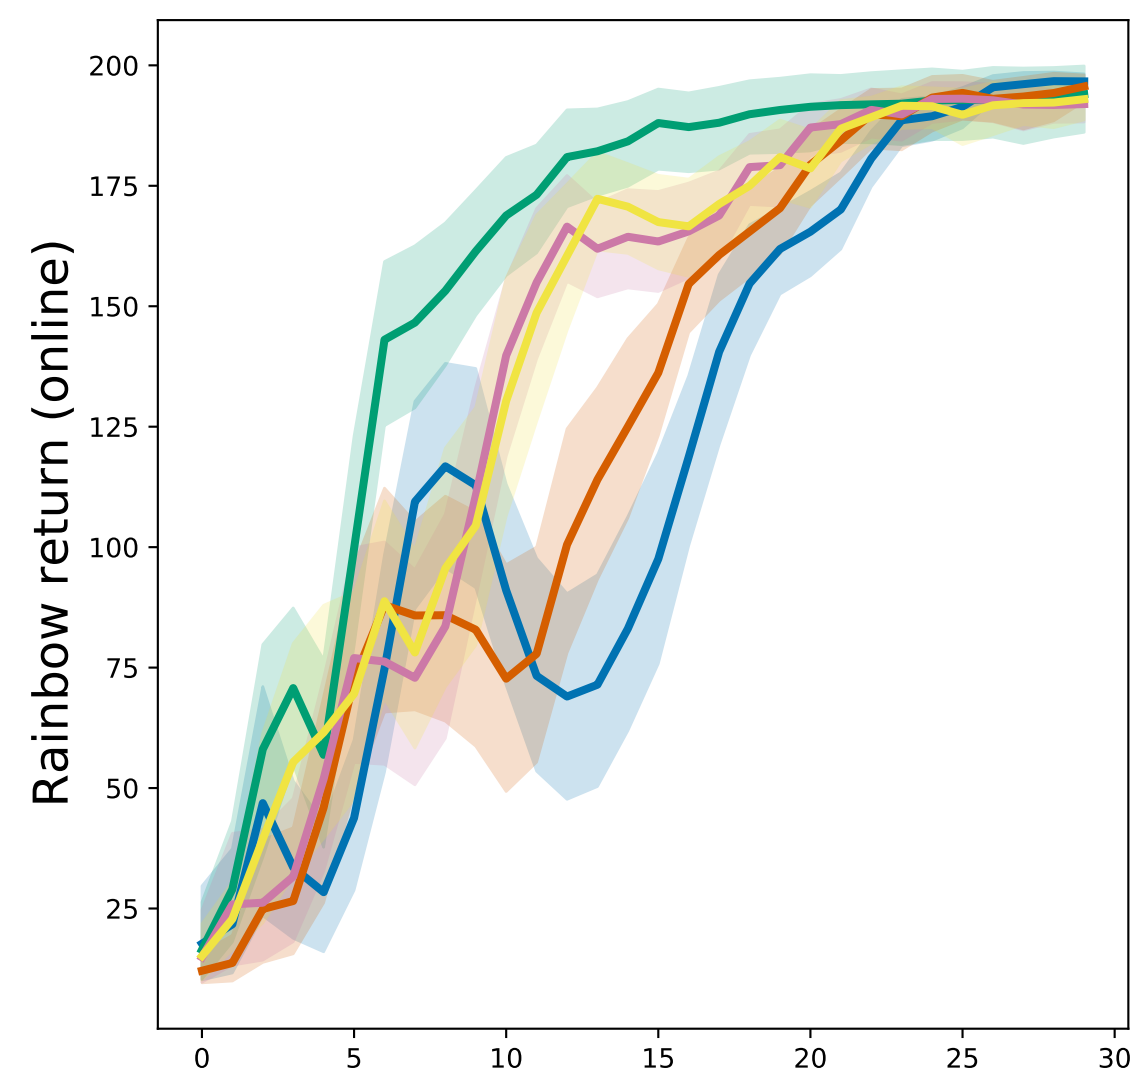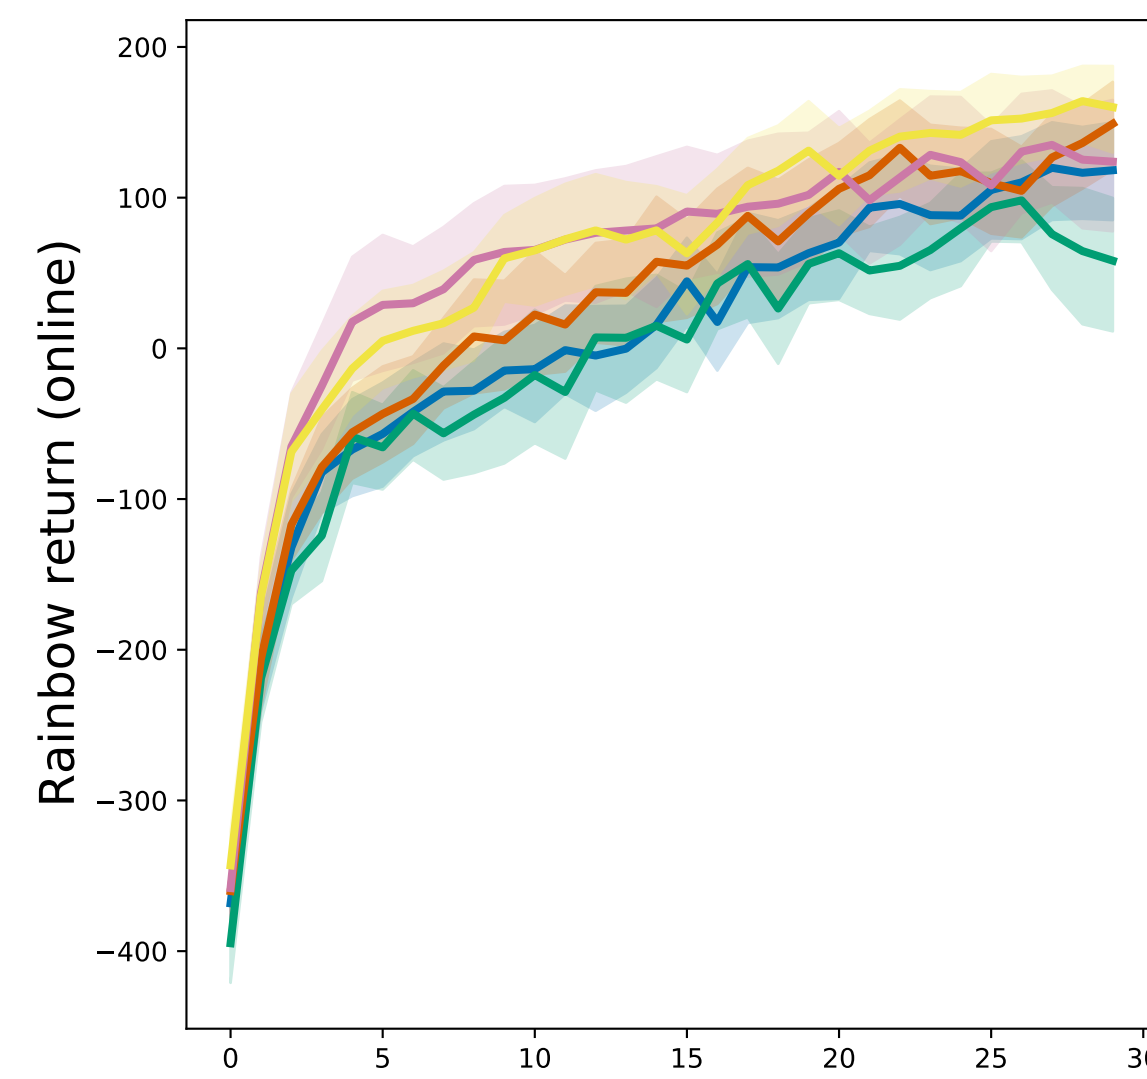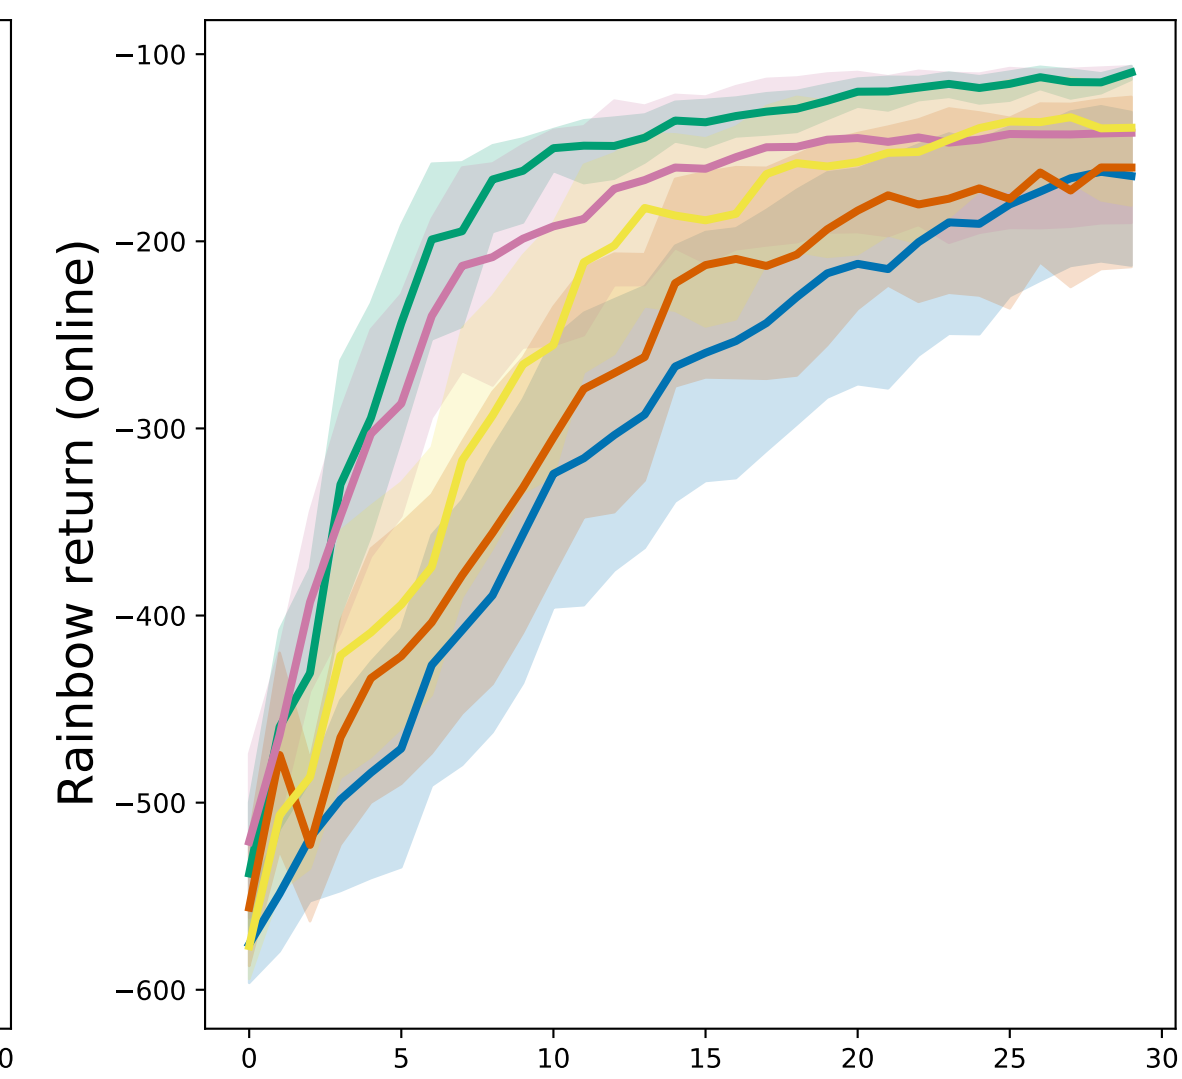

Supplement: supplementary_material [file attachment]

Acrobot

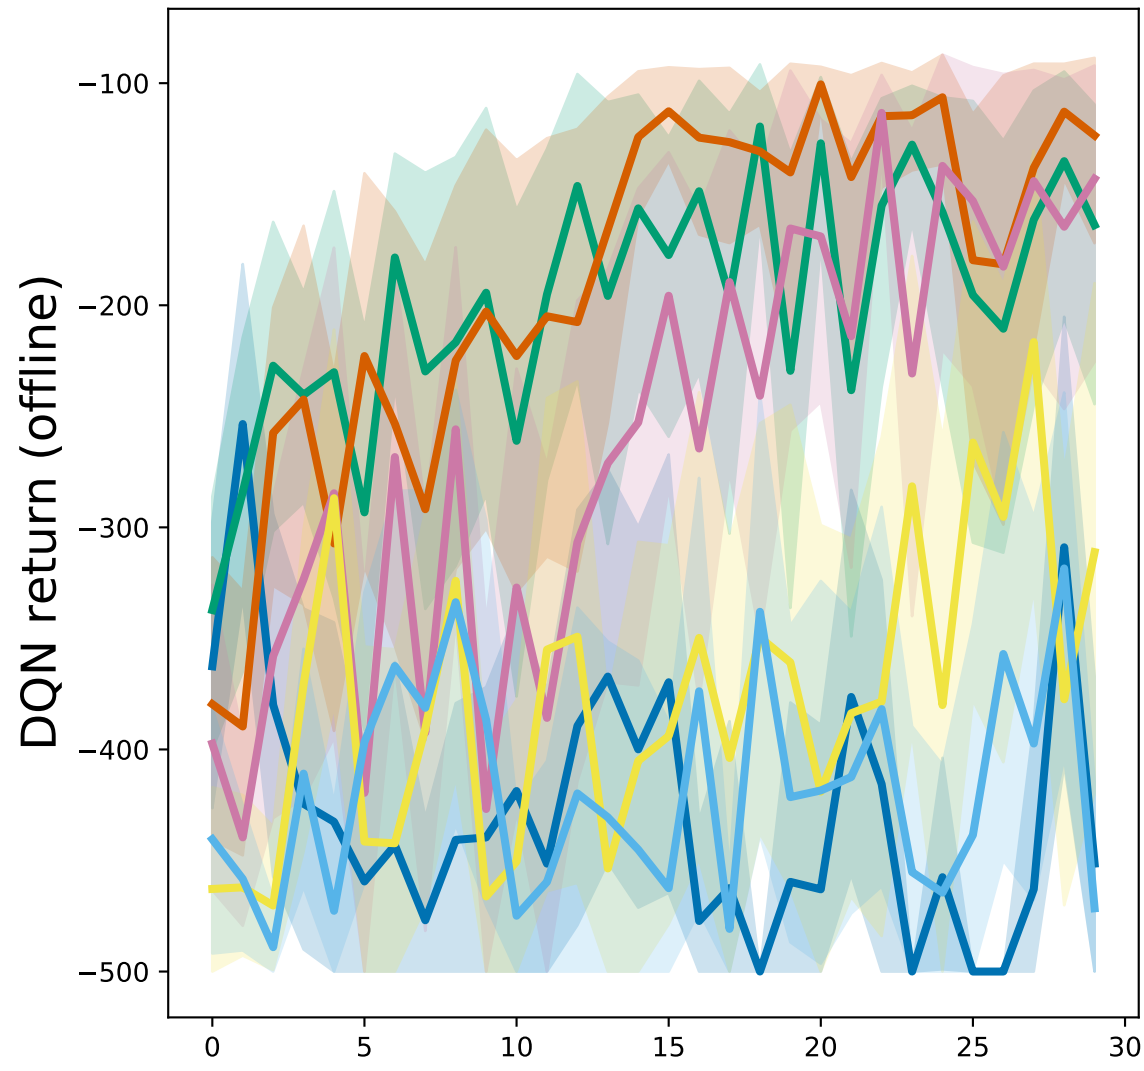

CartPole

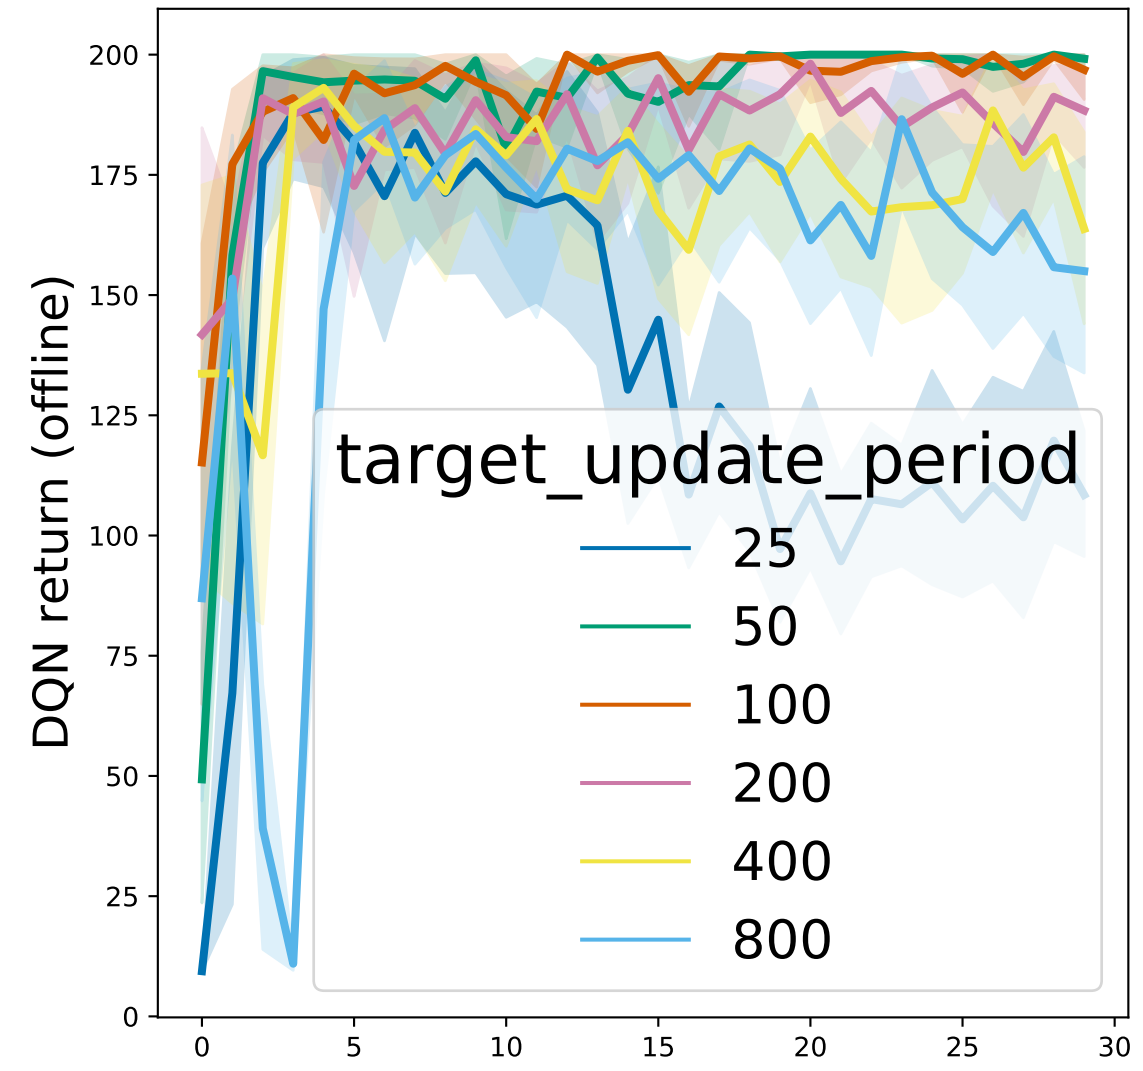

LunarLander

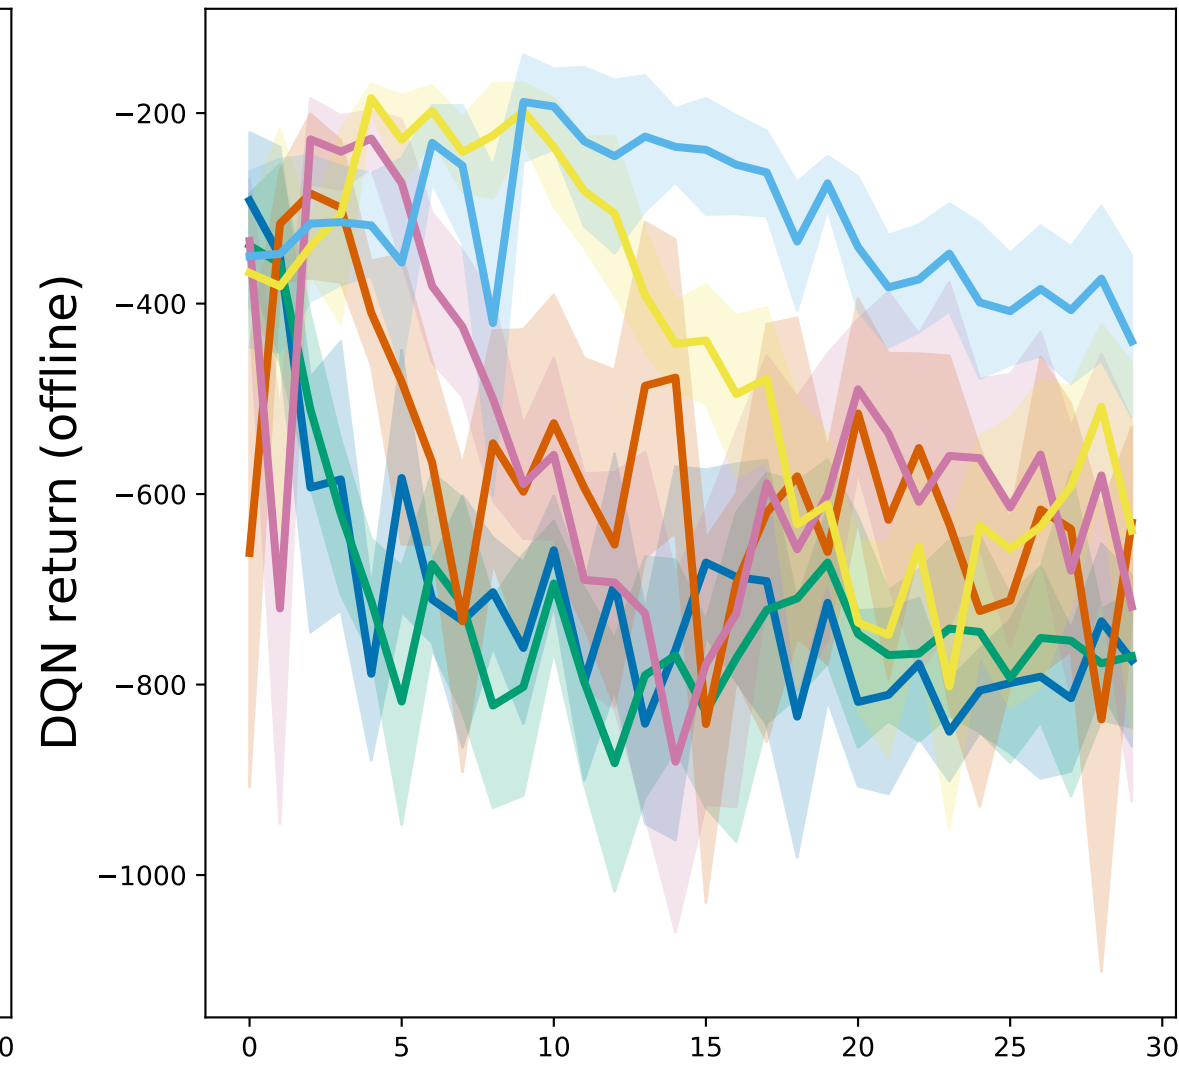

MountainCar

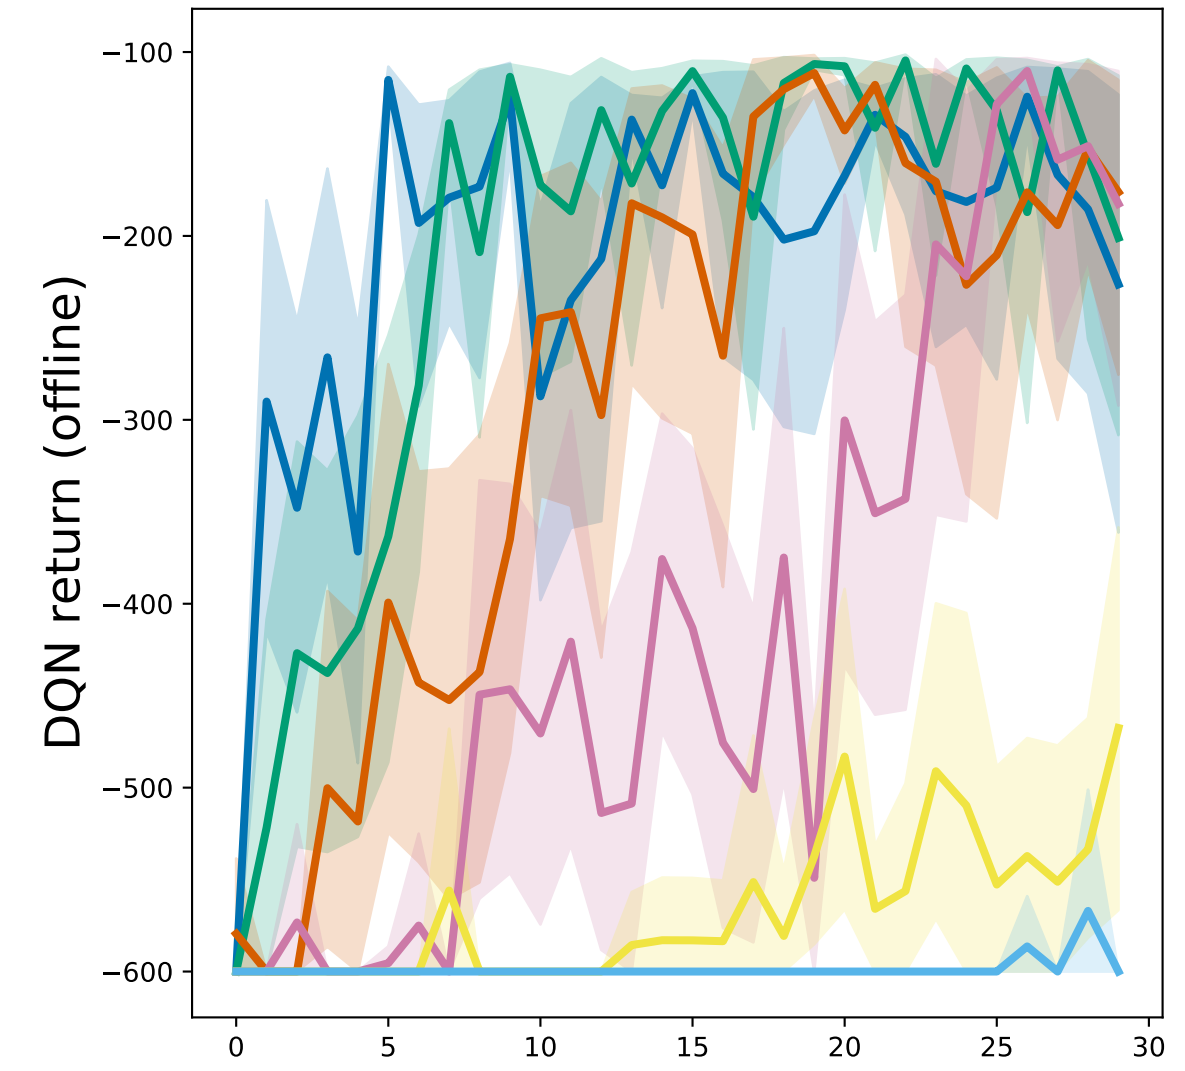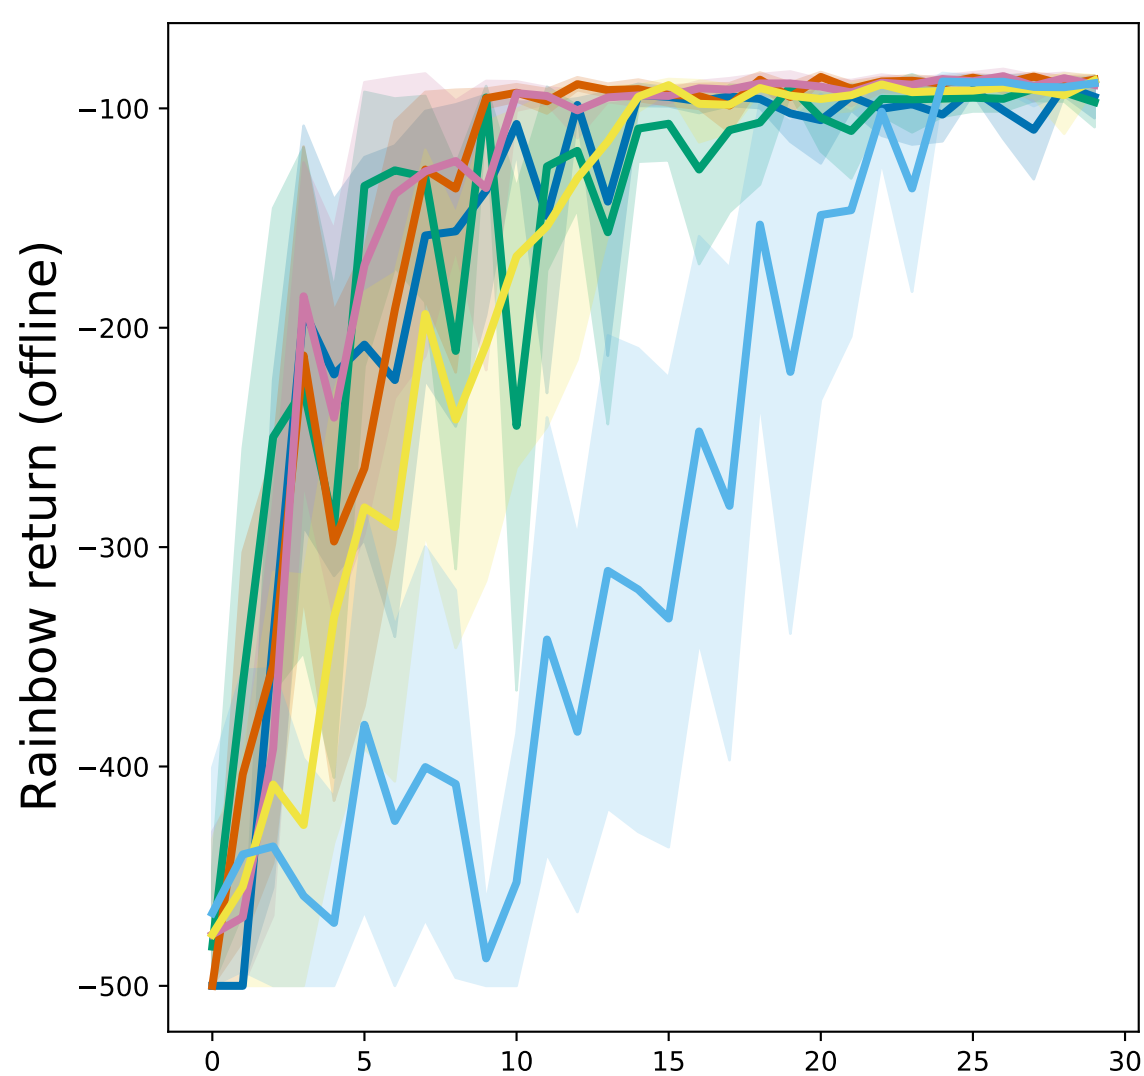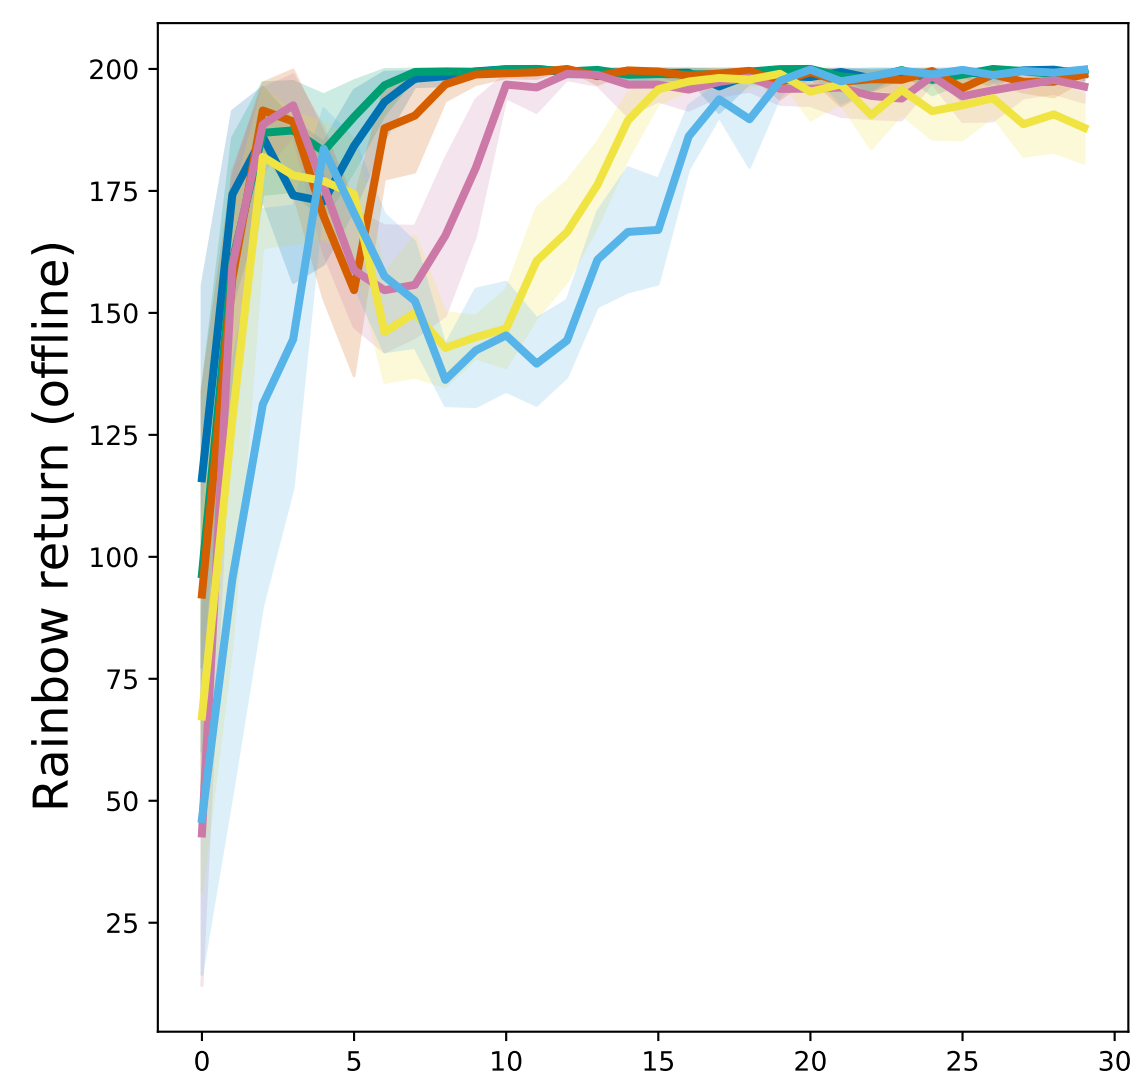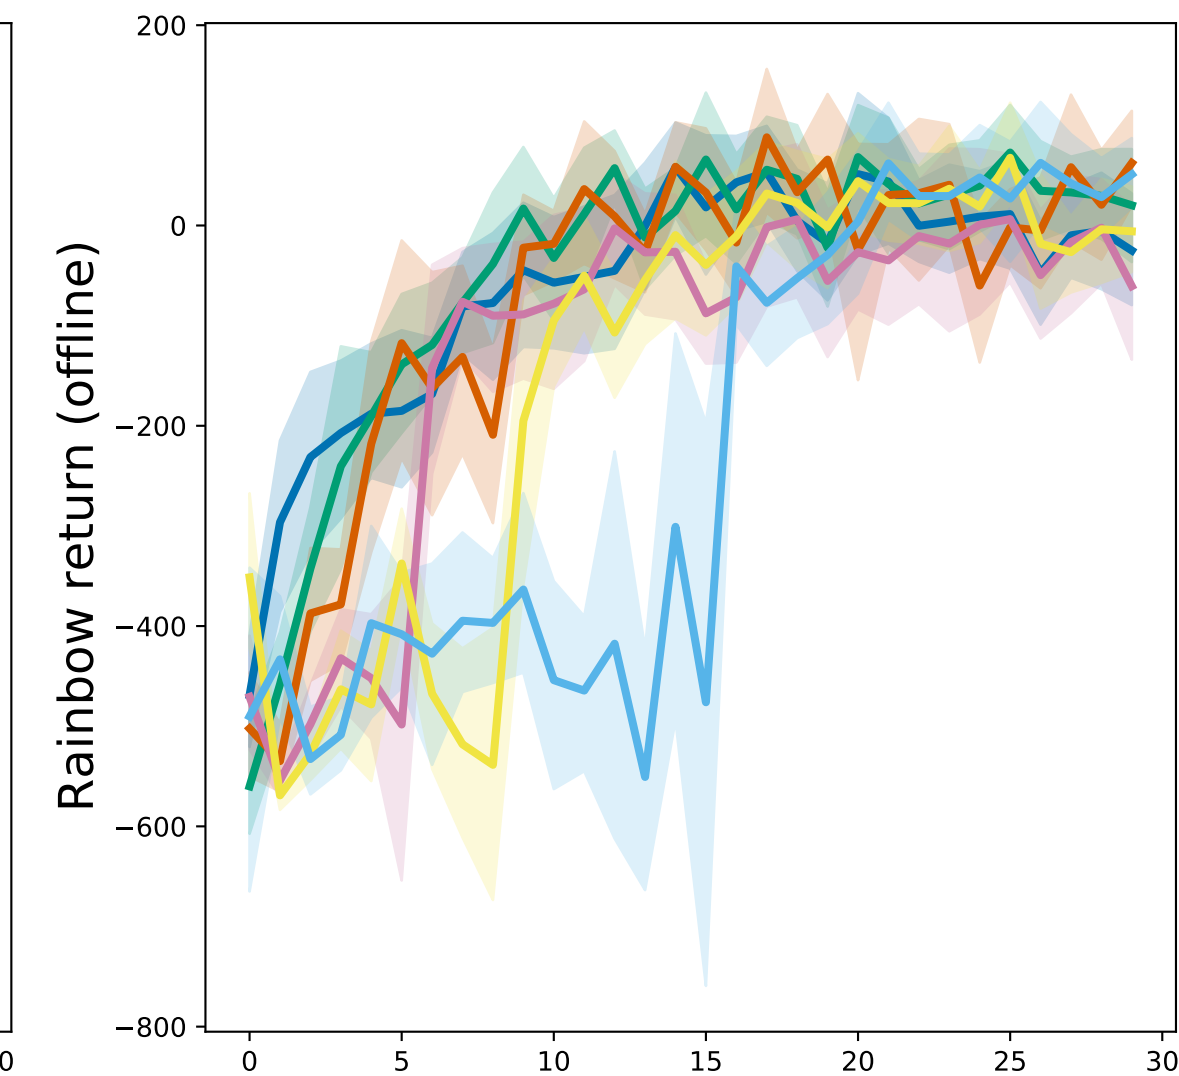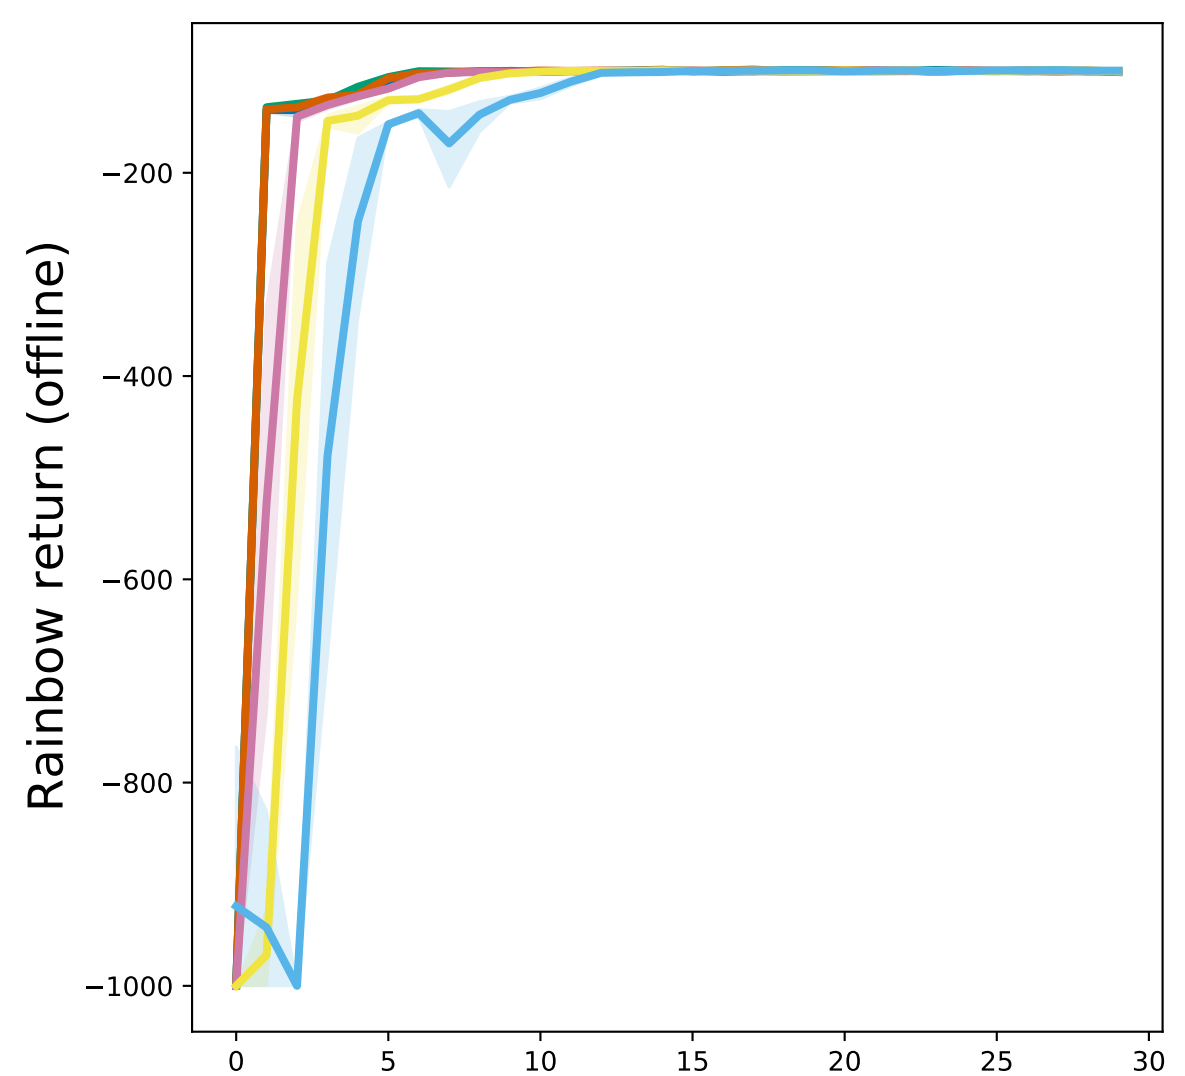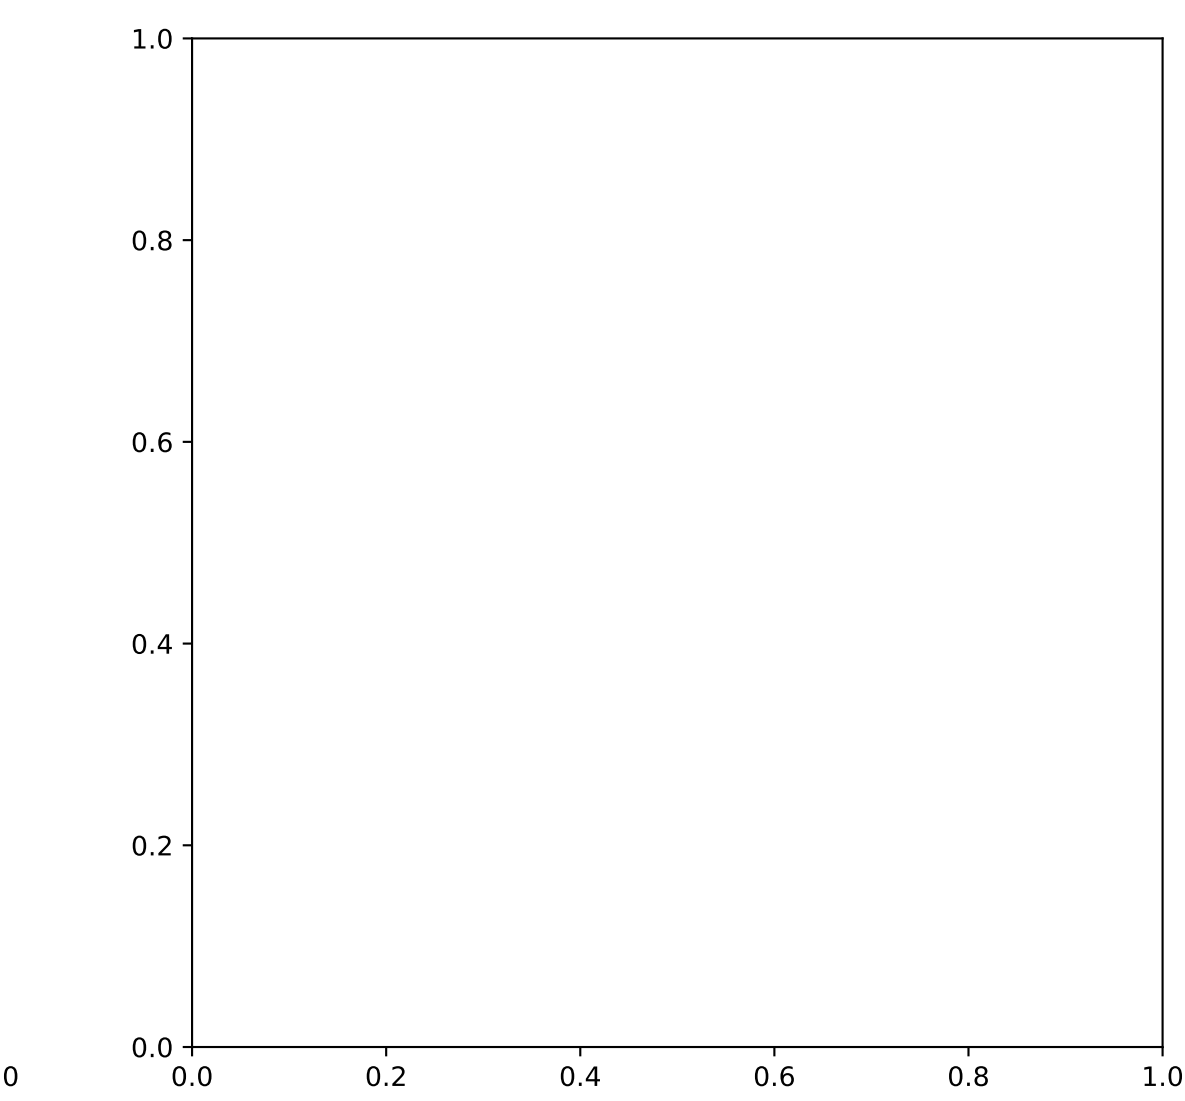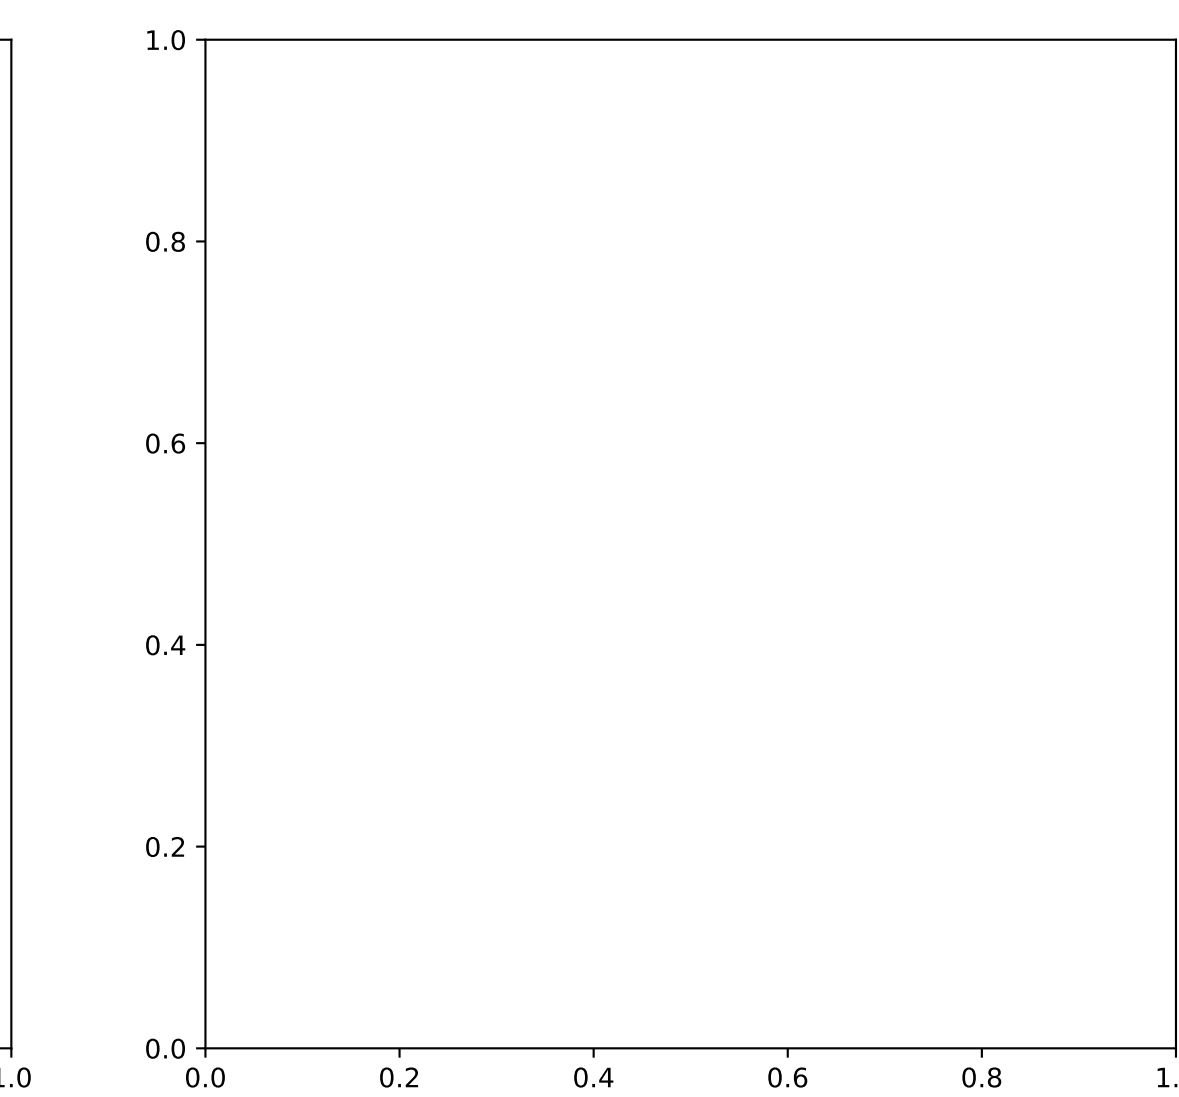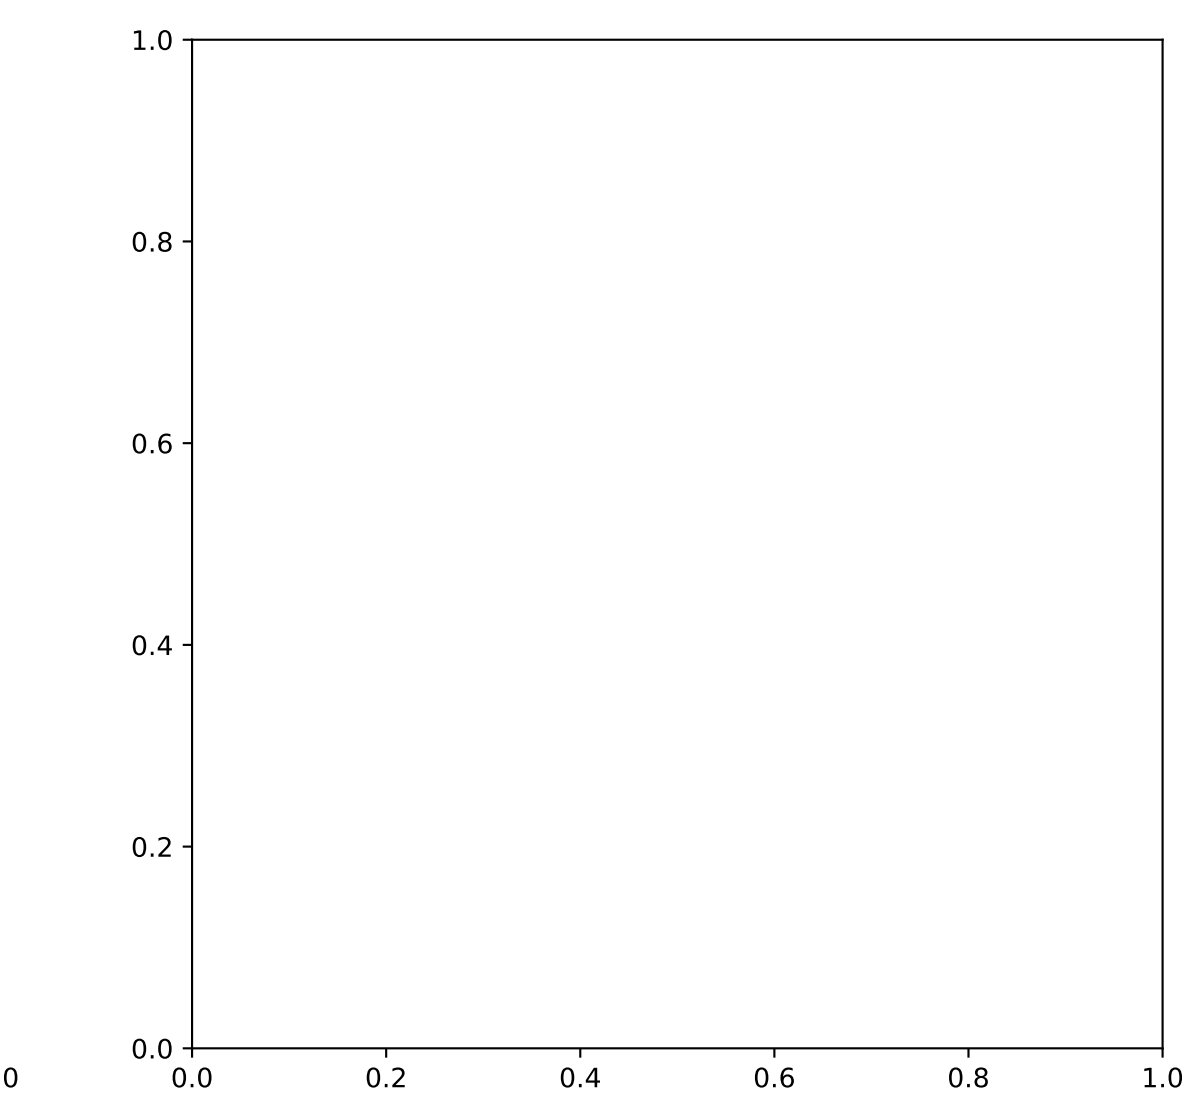

Supplement: supplementary_material [file attachment]

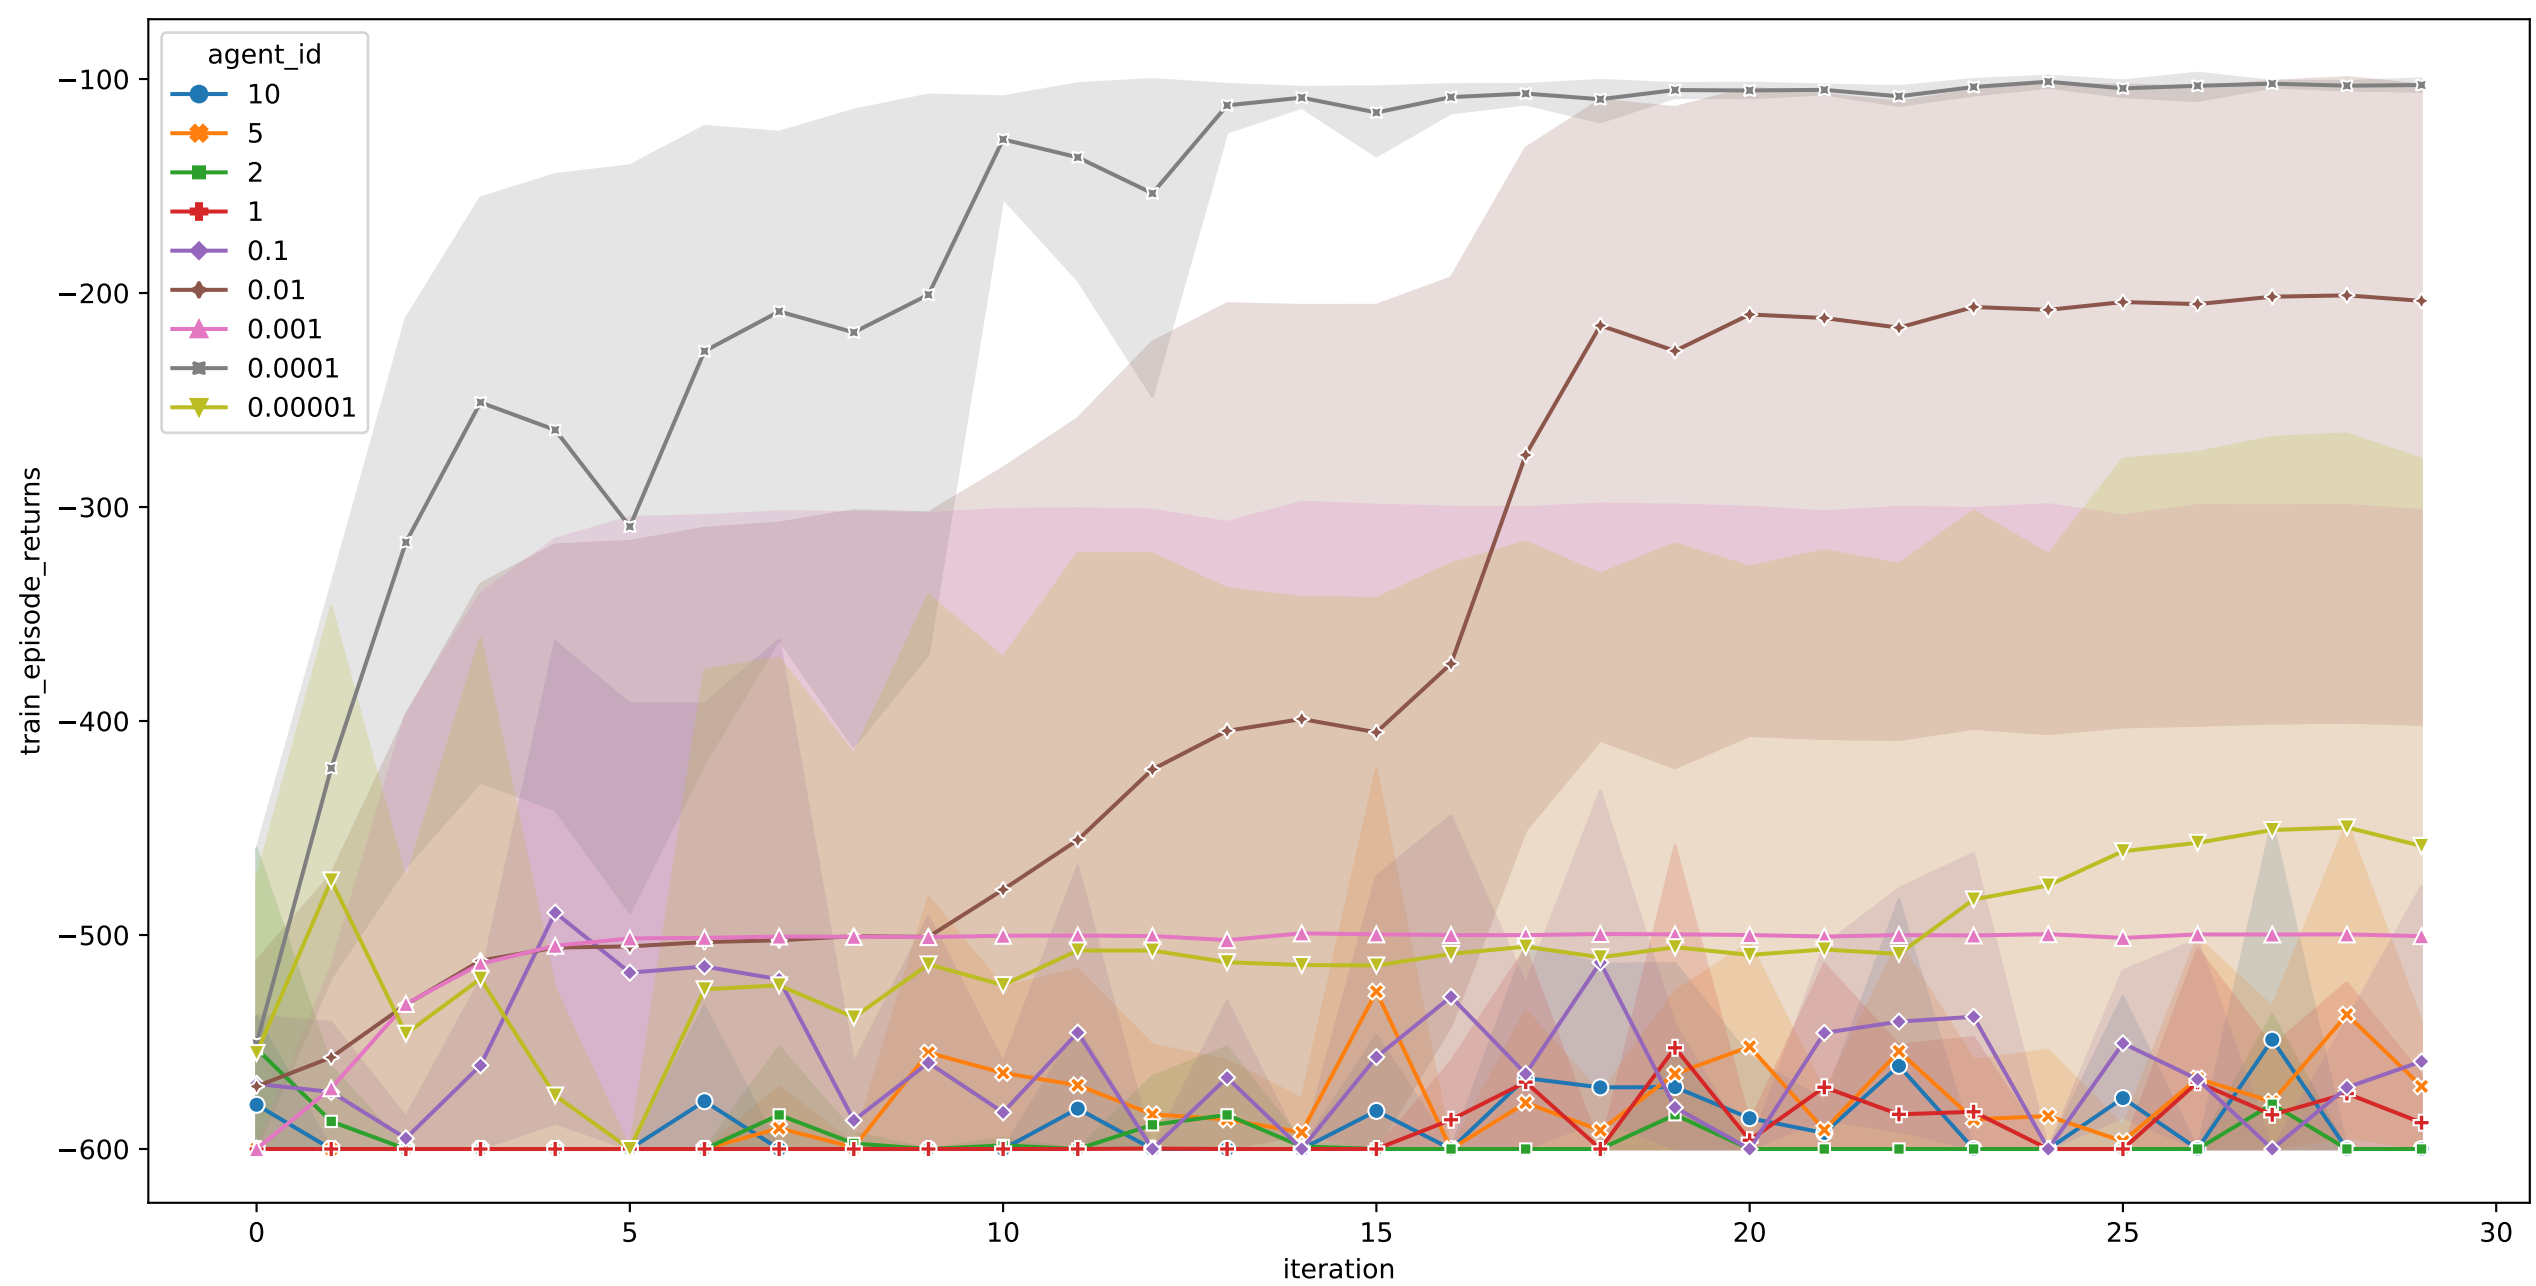

Supplement: supplementary_material [file attachment]

Acrobot

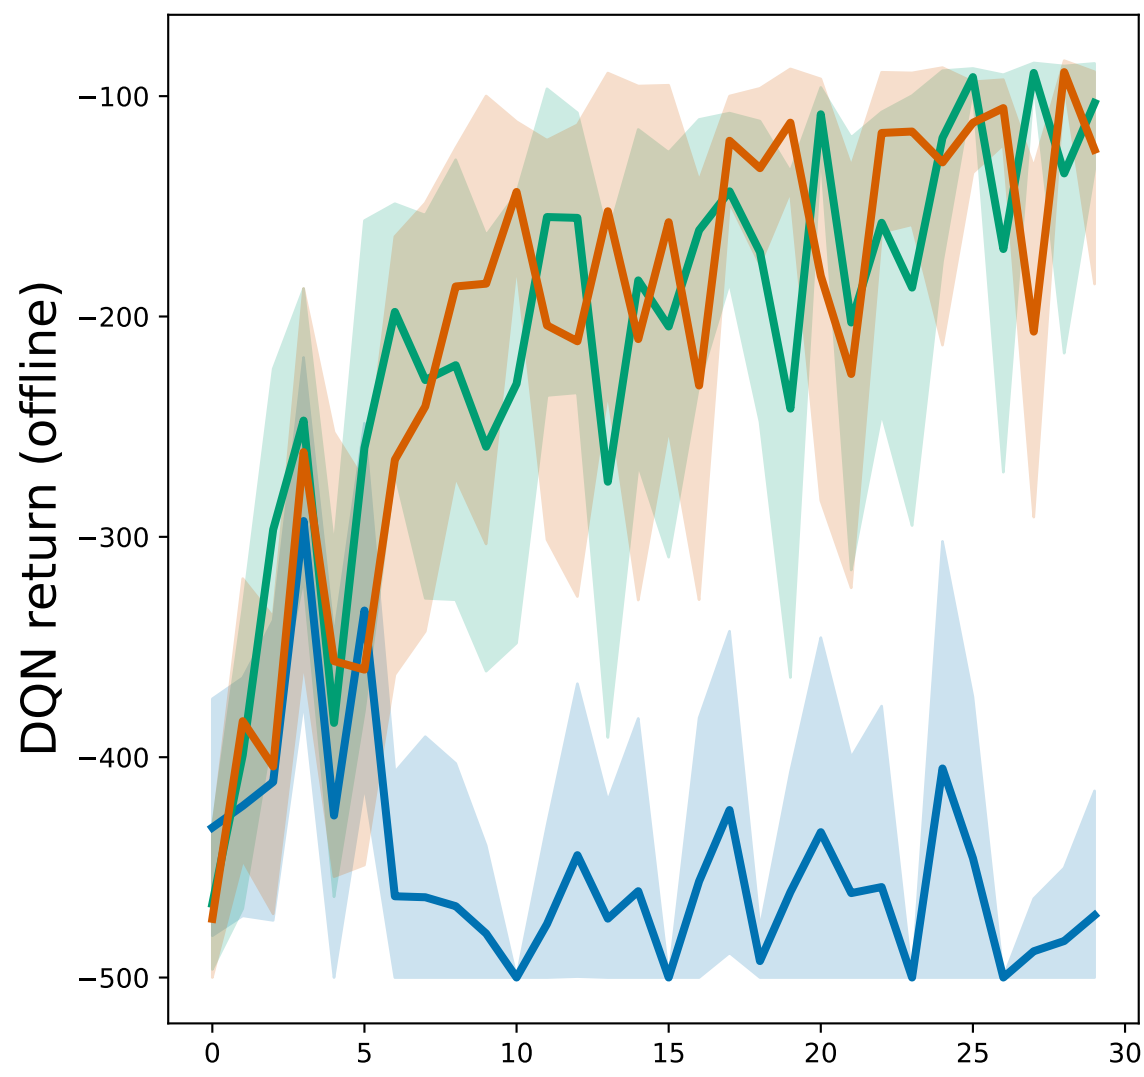

CartPole

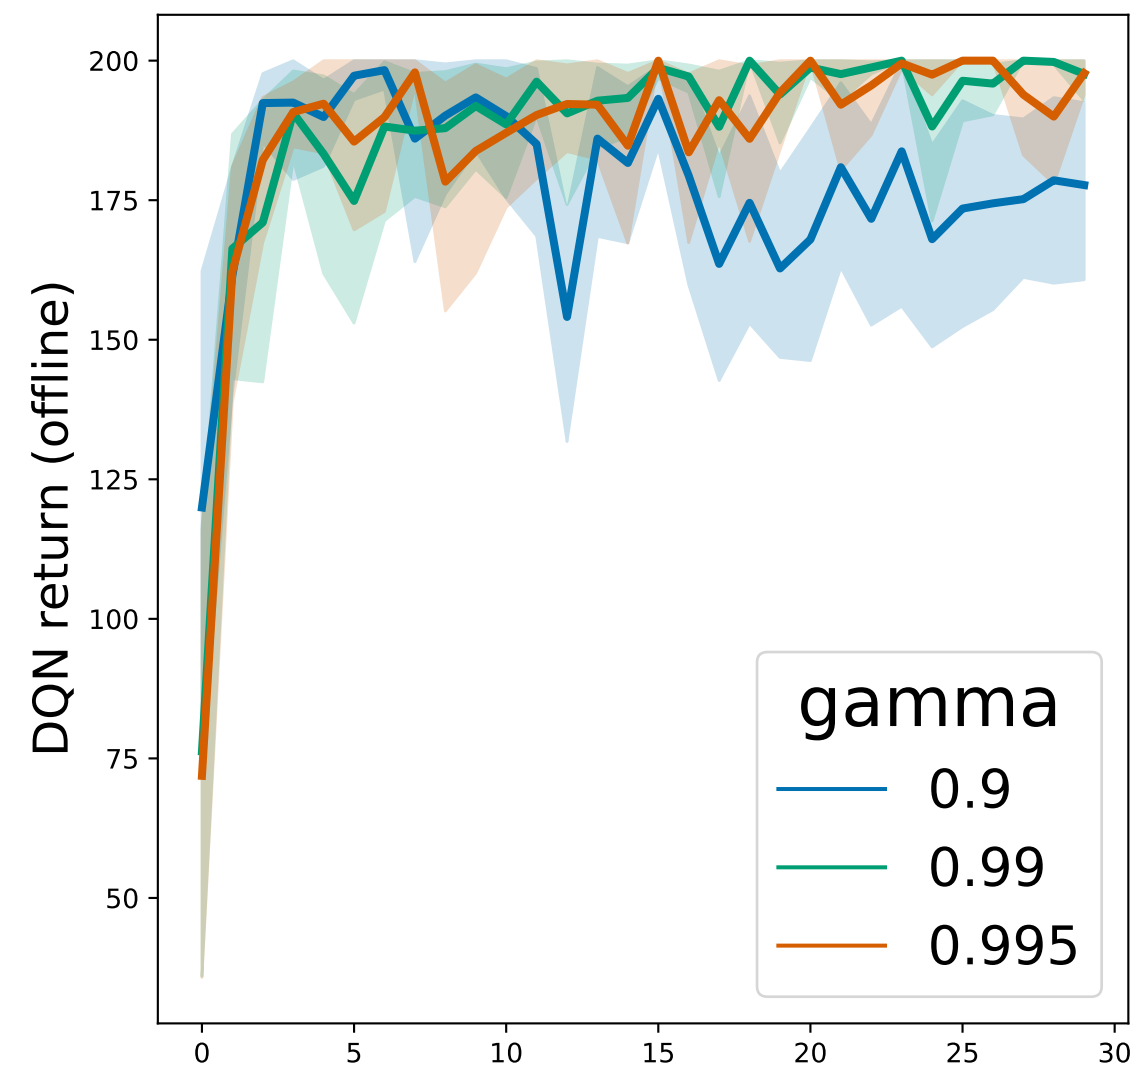

LunarLander

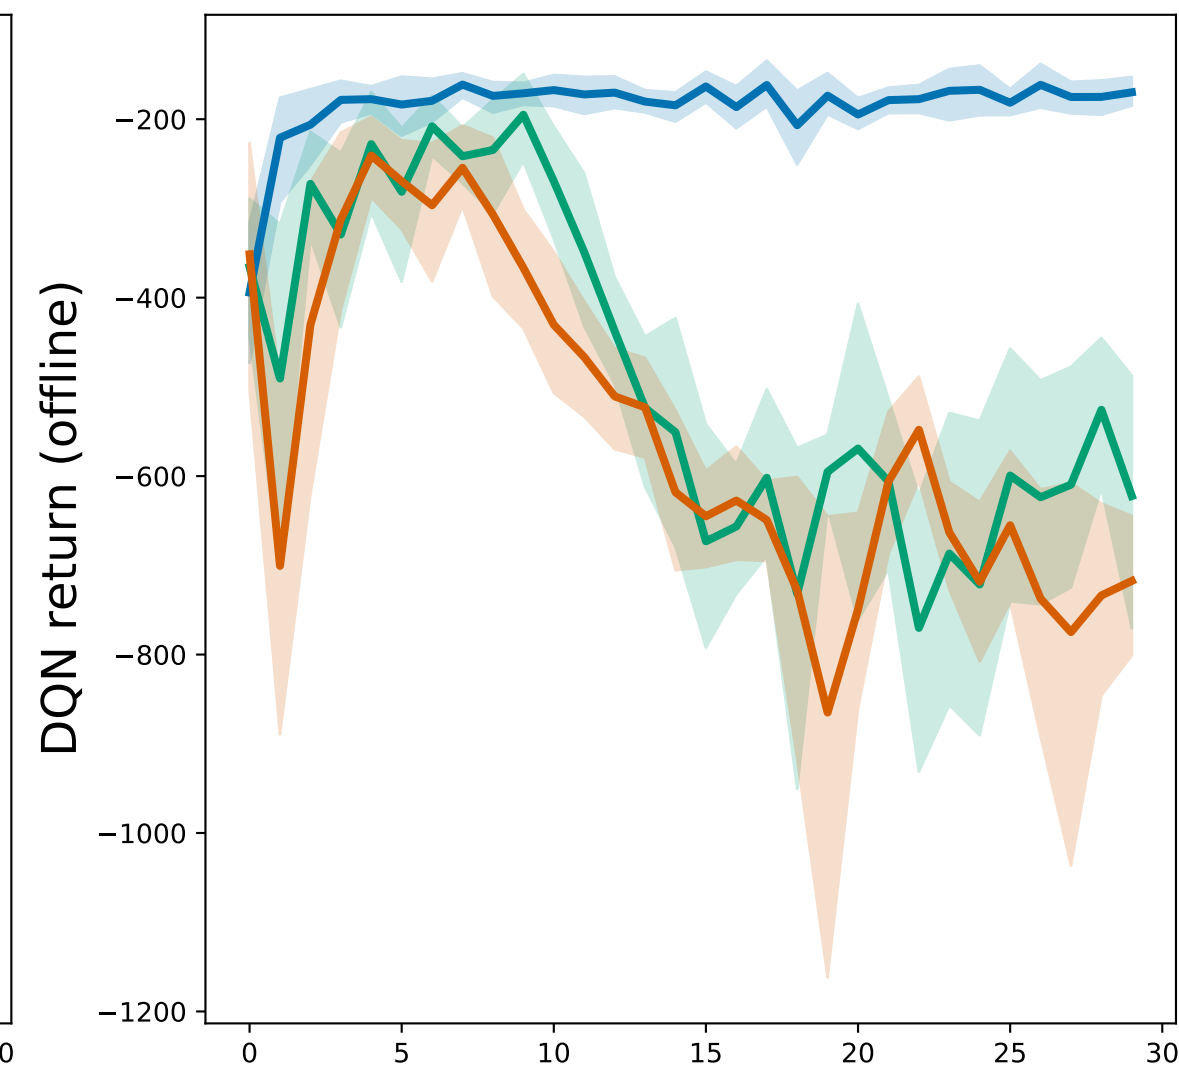

MountainCar

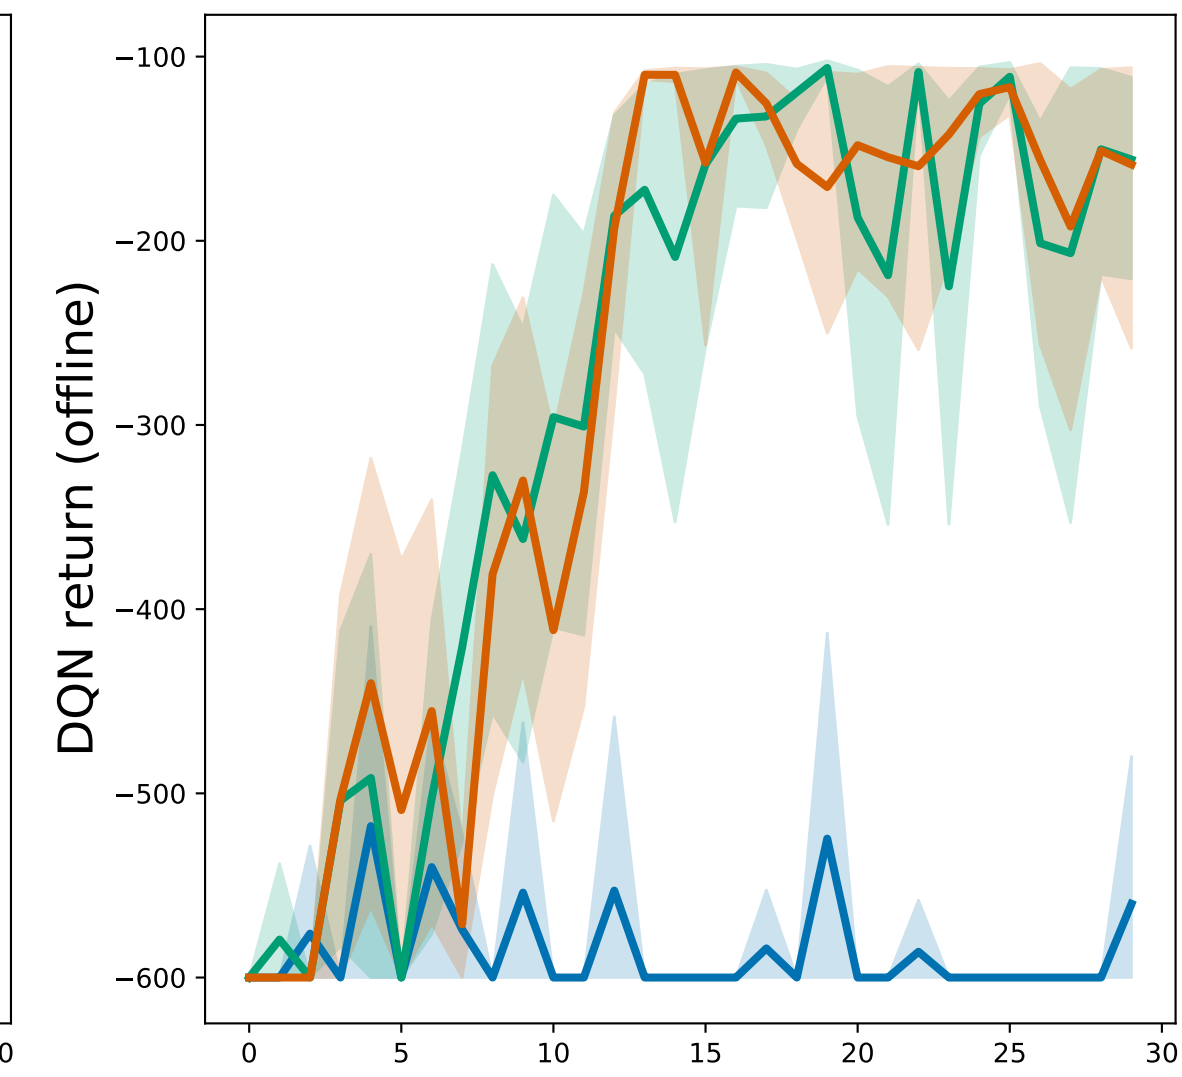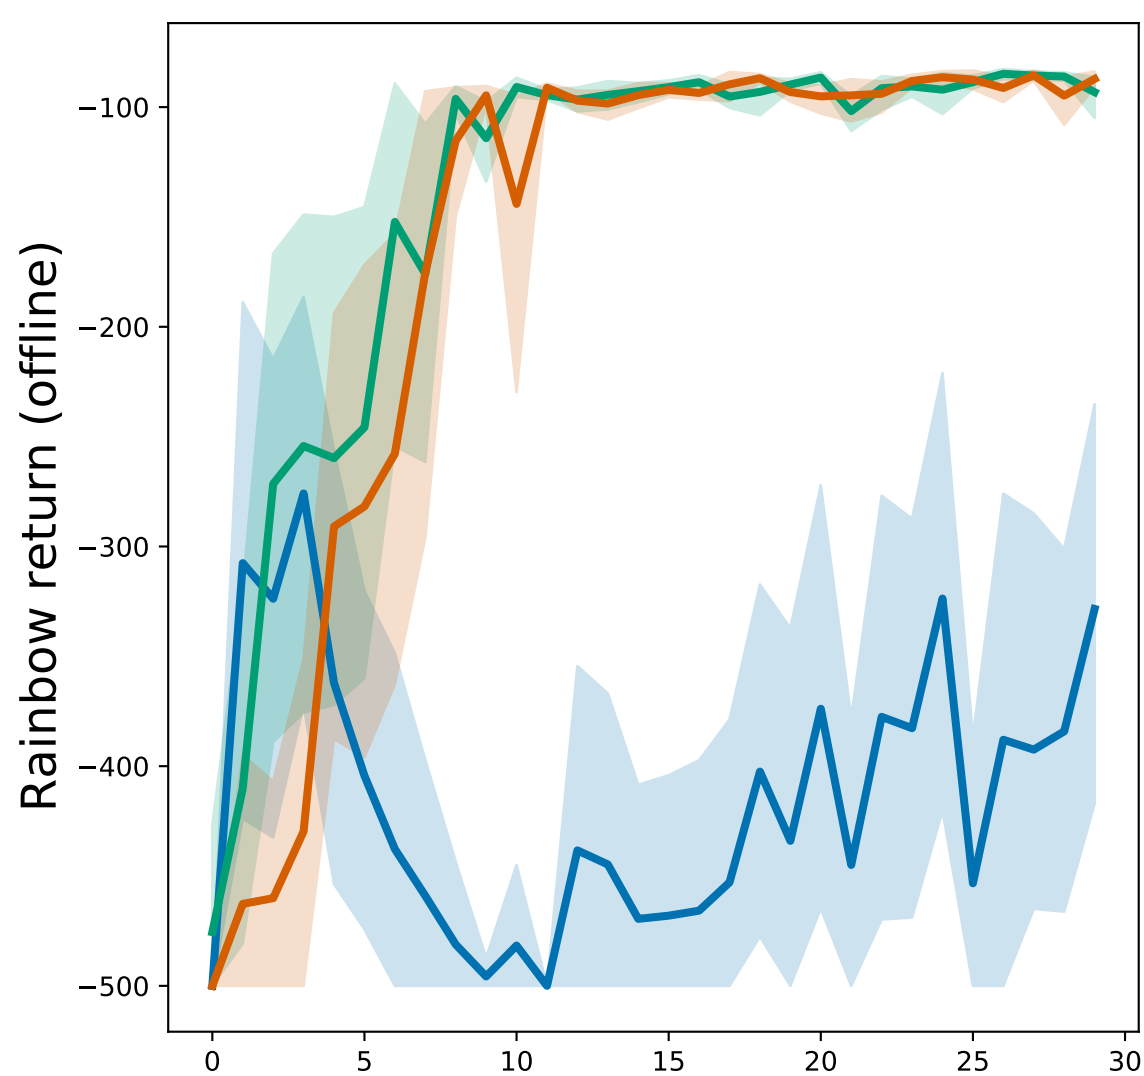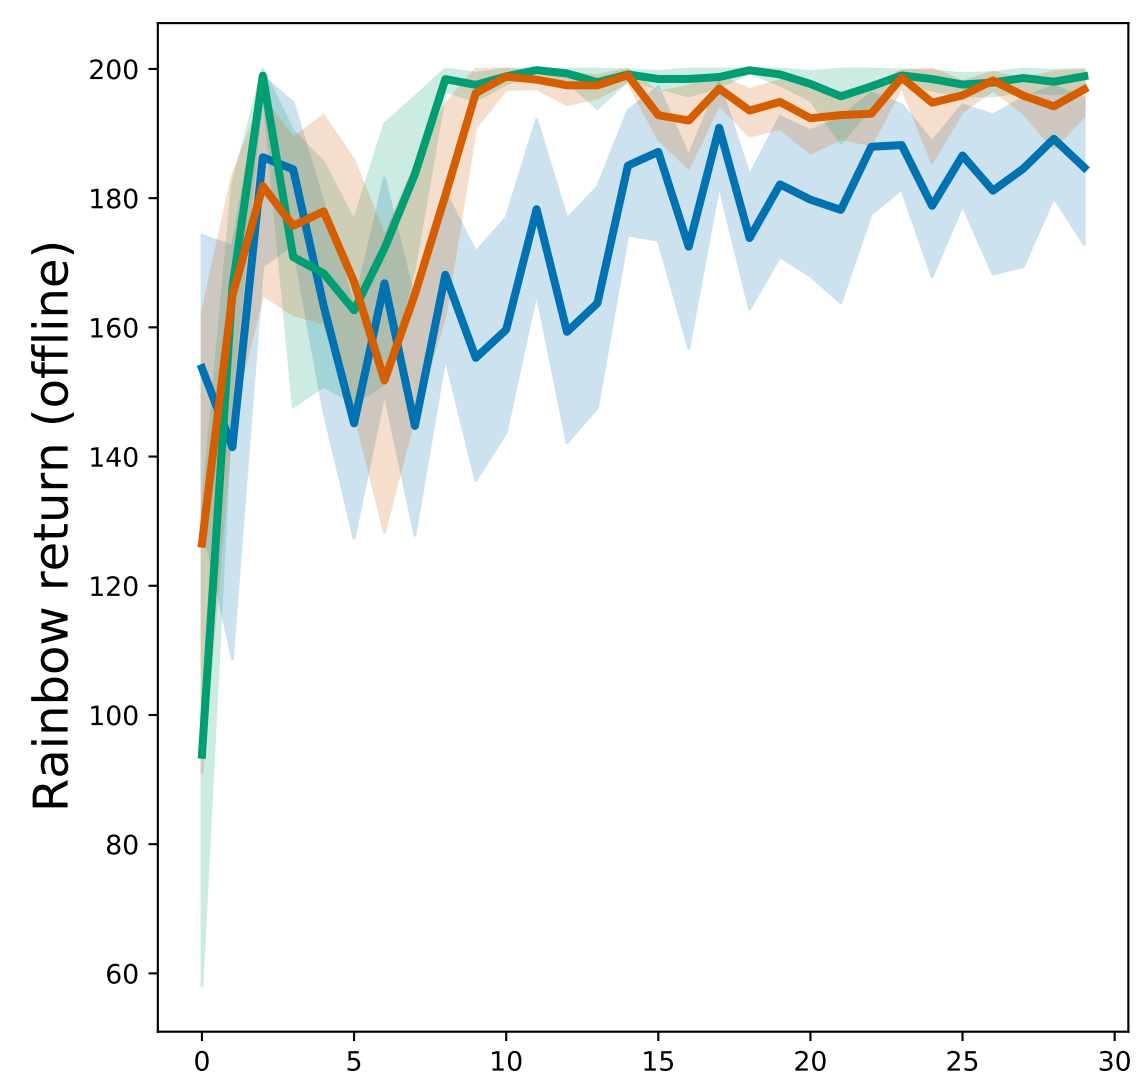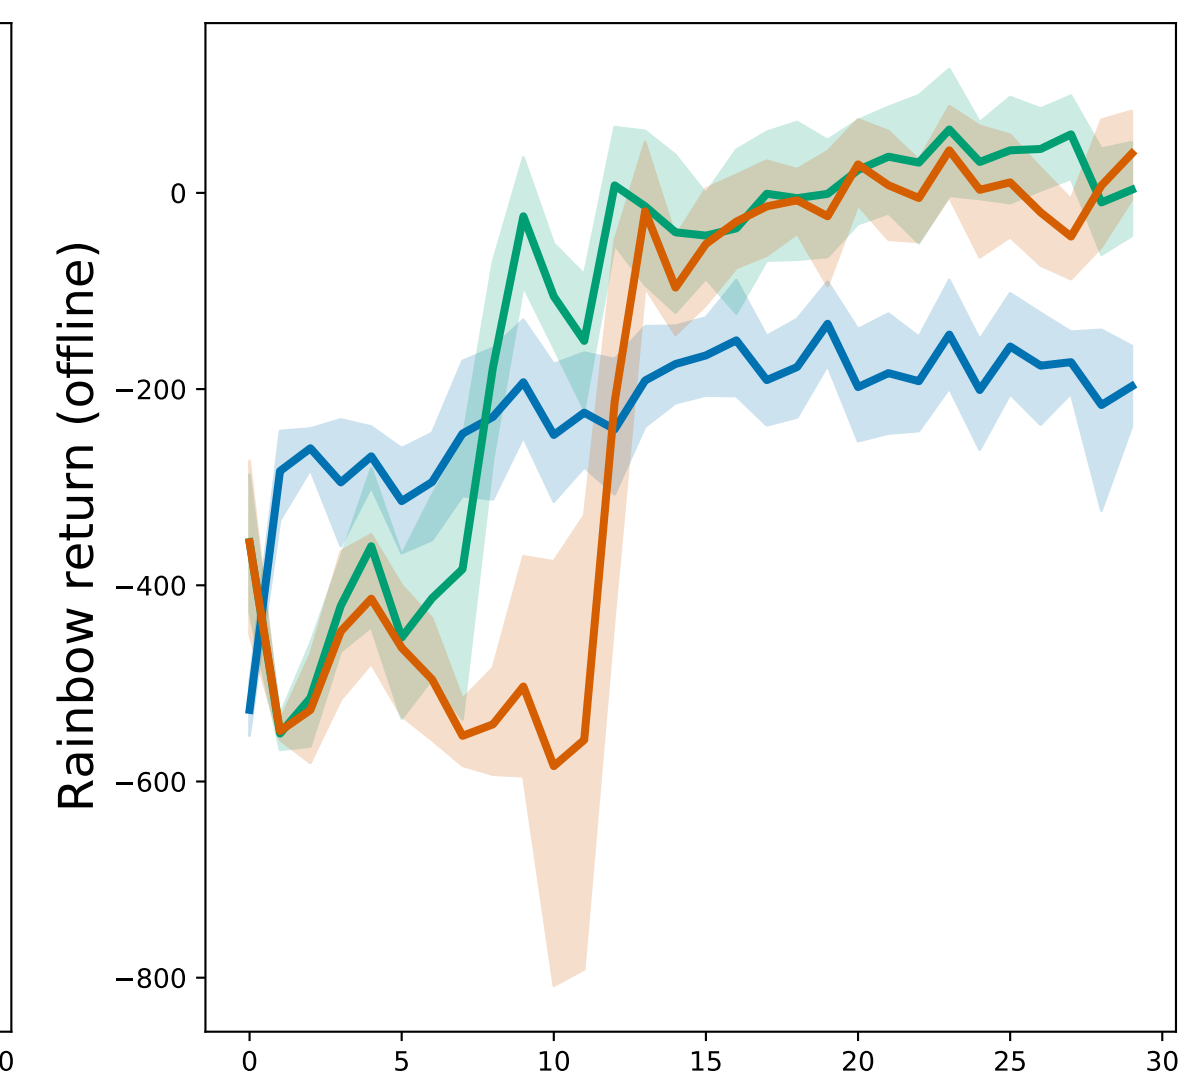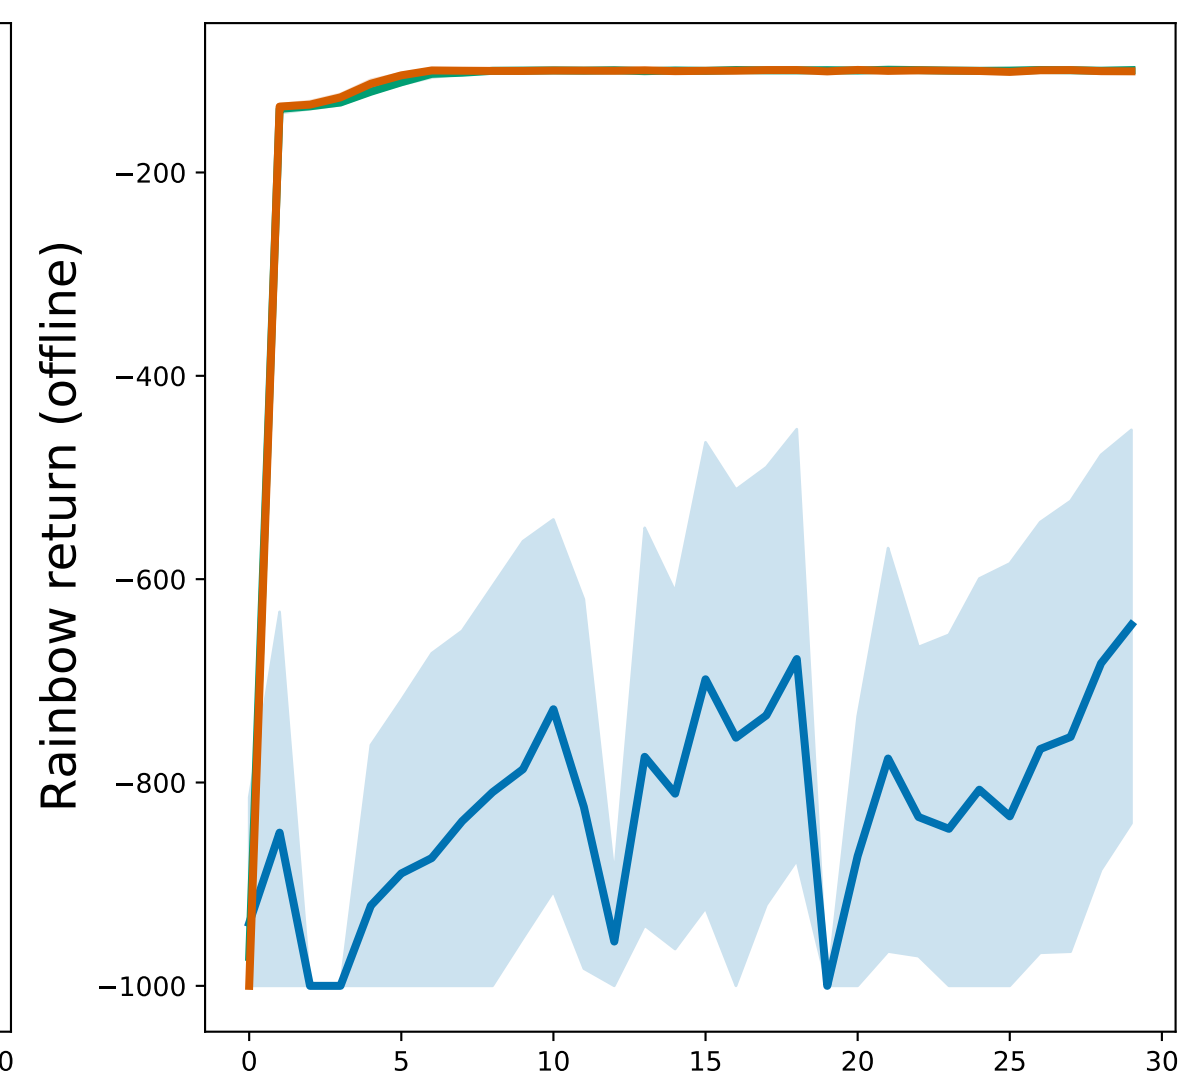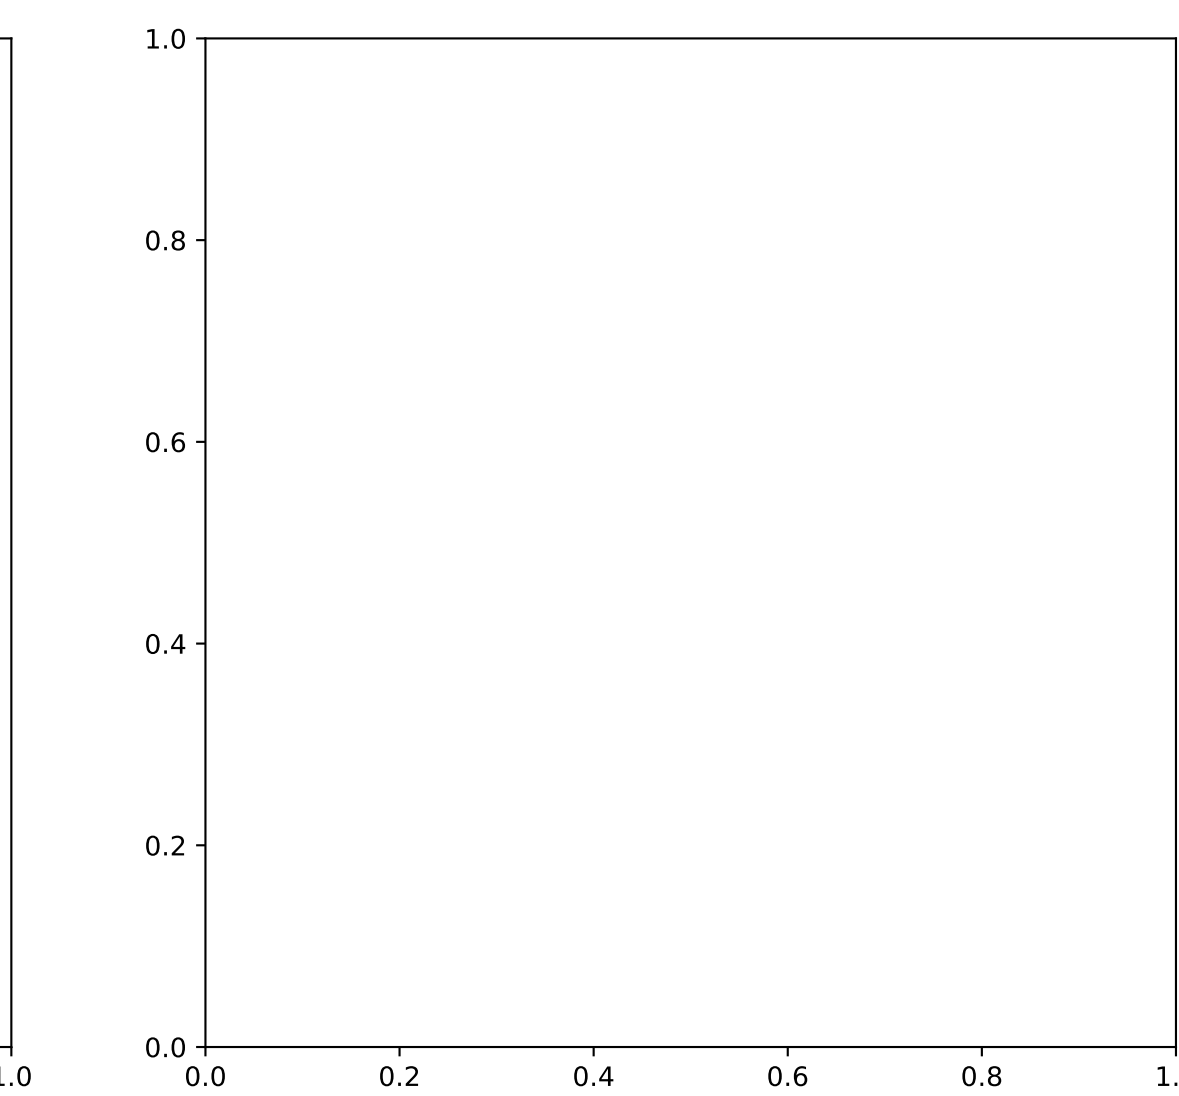

Supplement: supplementary_material [file attachment]

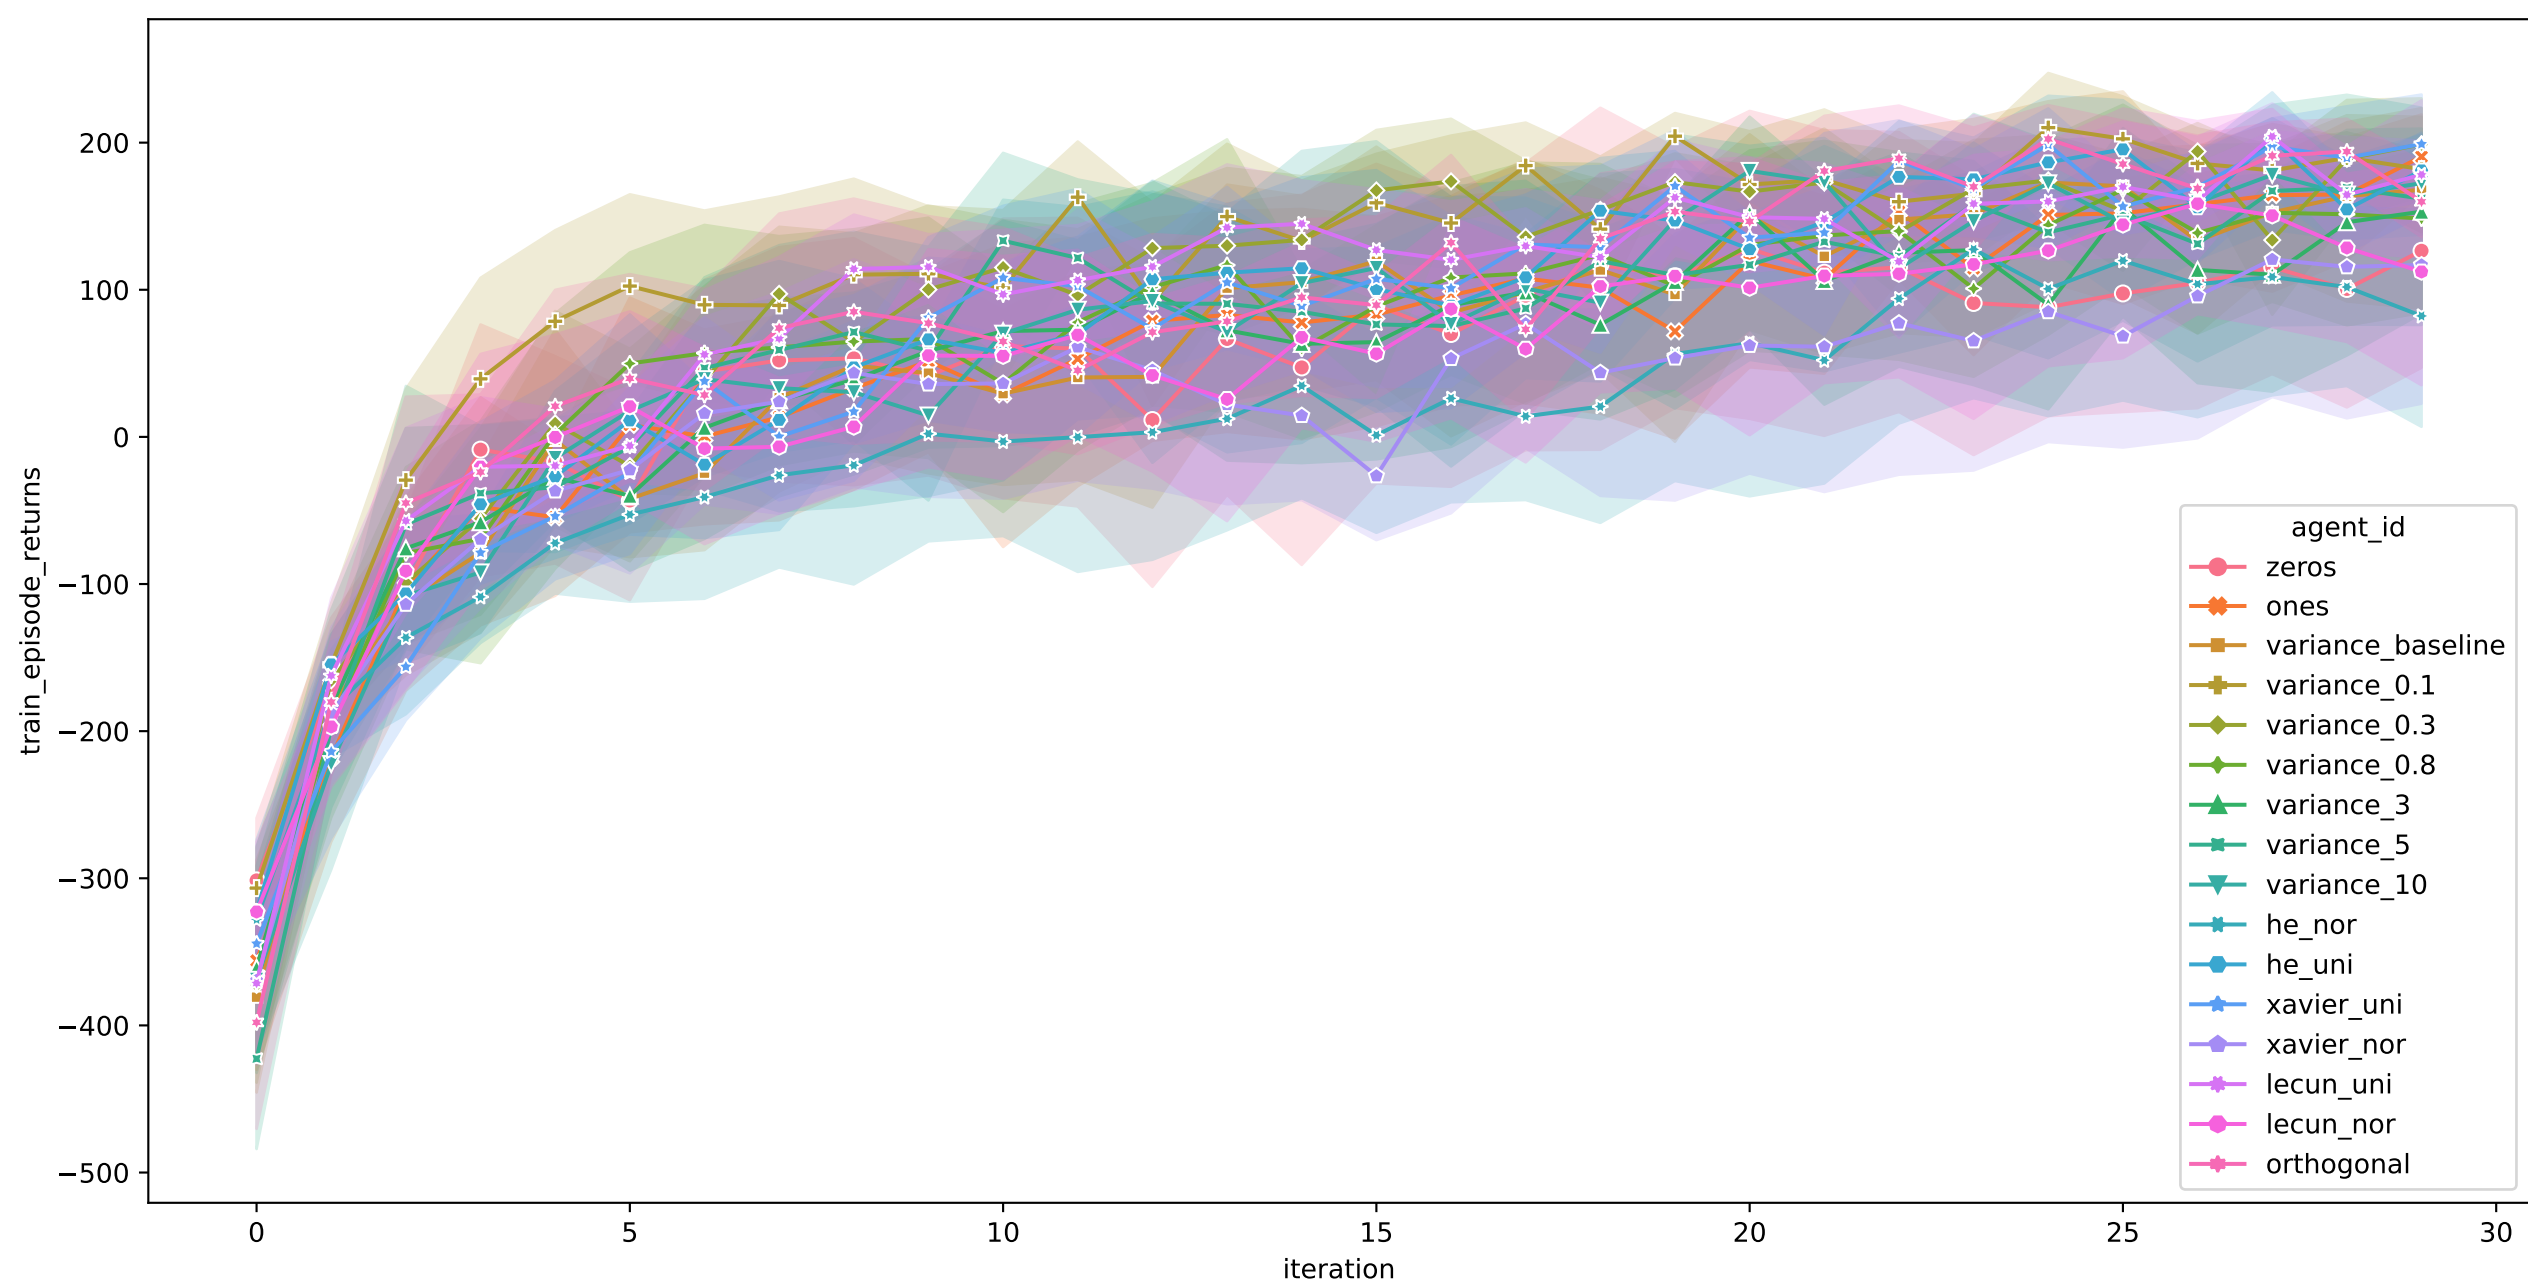

Supplement: supplementary_material [file attachment]

Acrobot

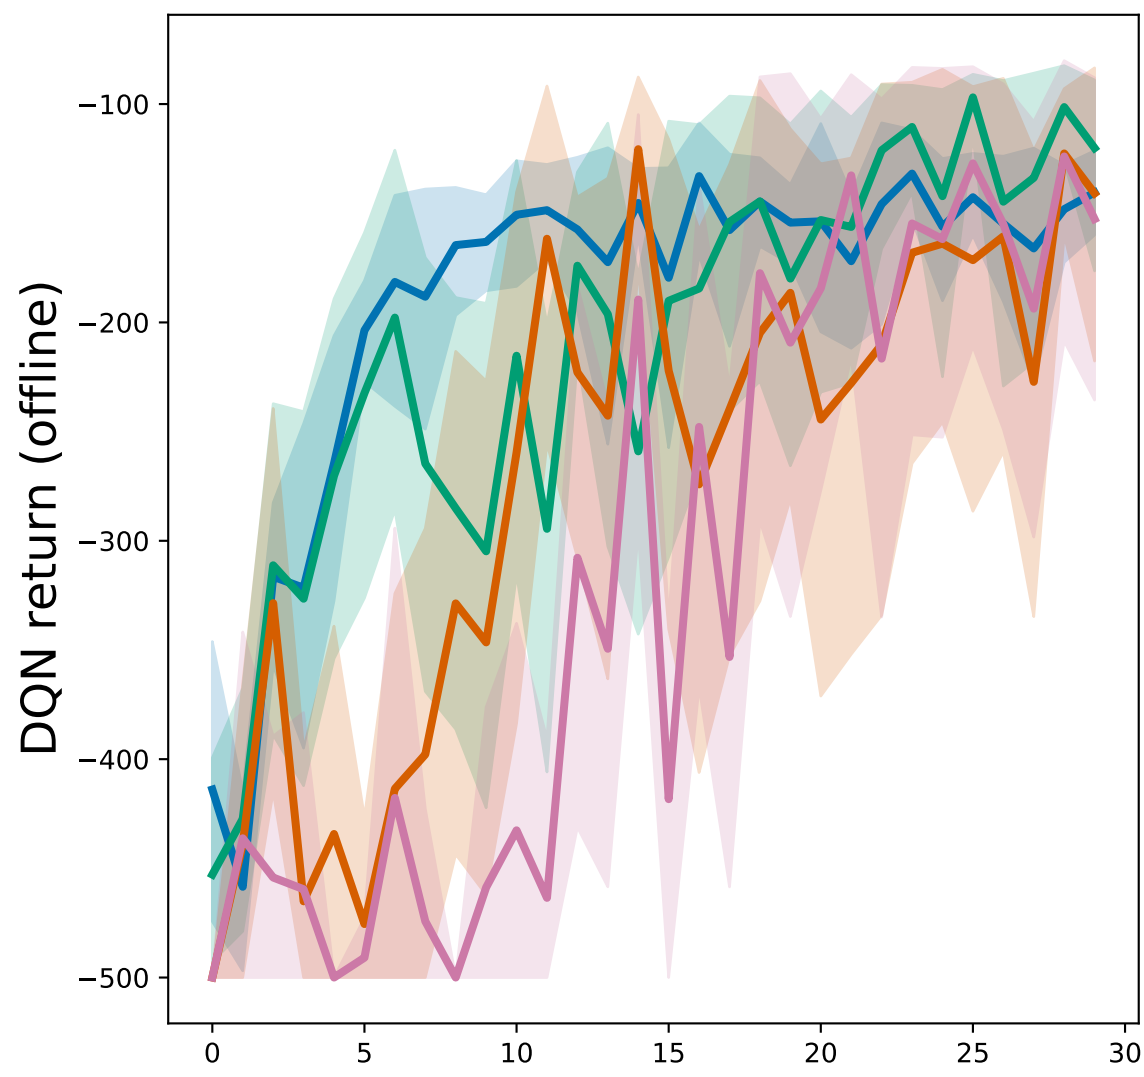

CartPole

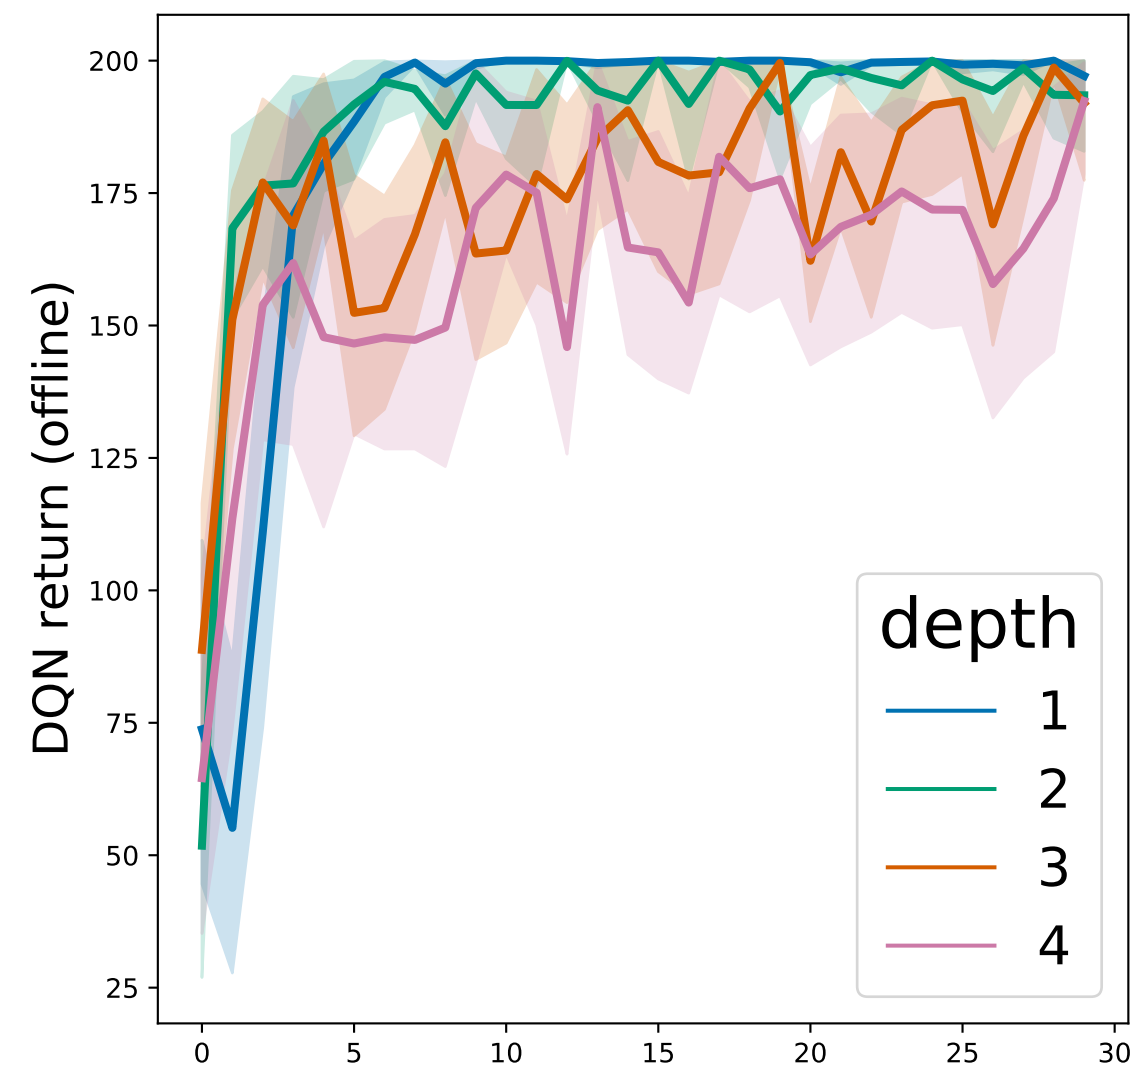

LunarLander

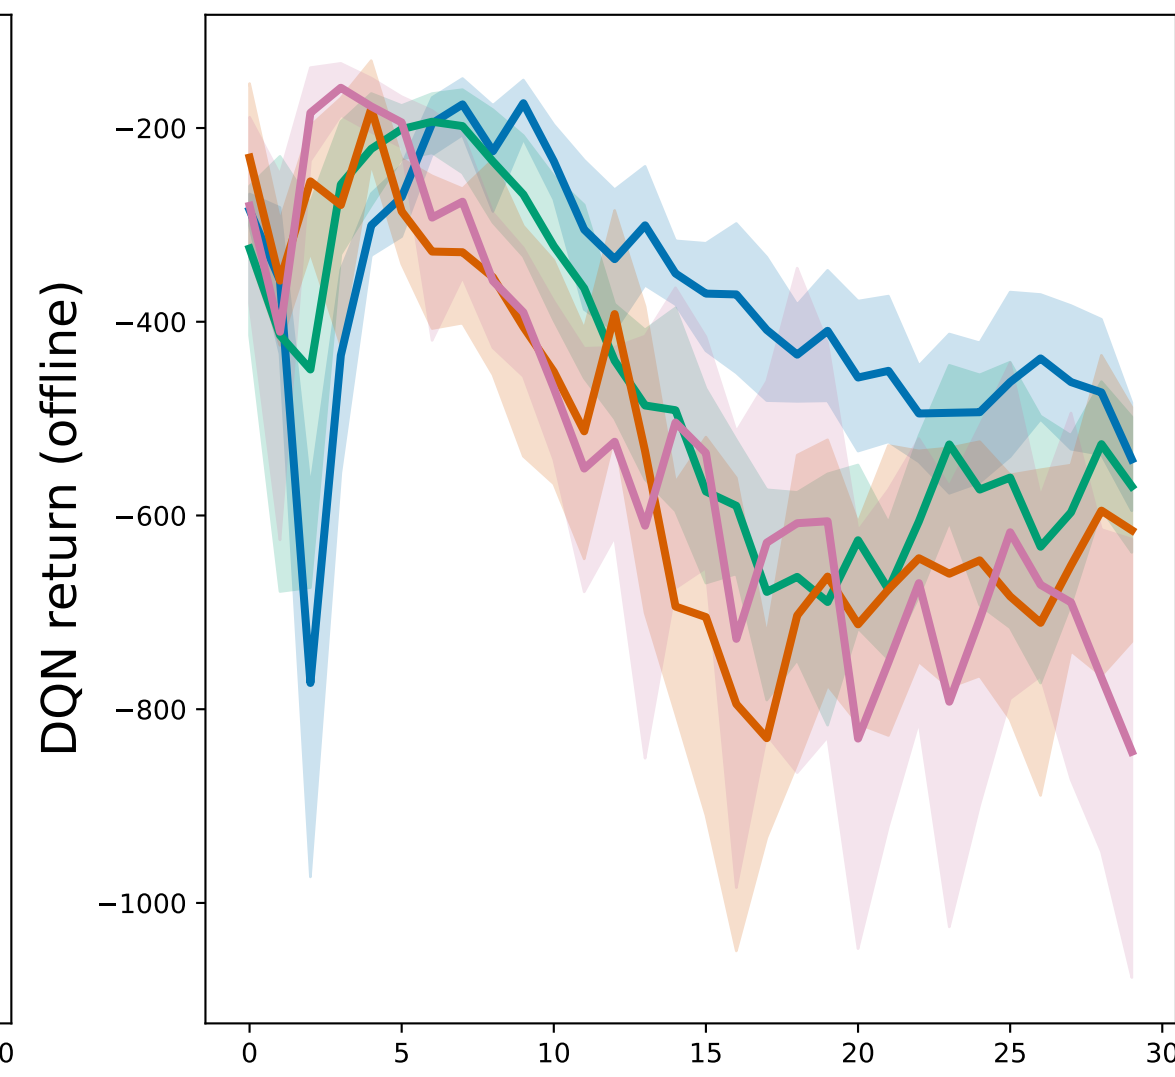

MountainCar

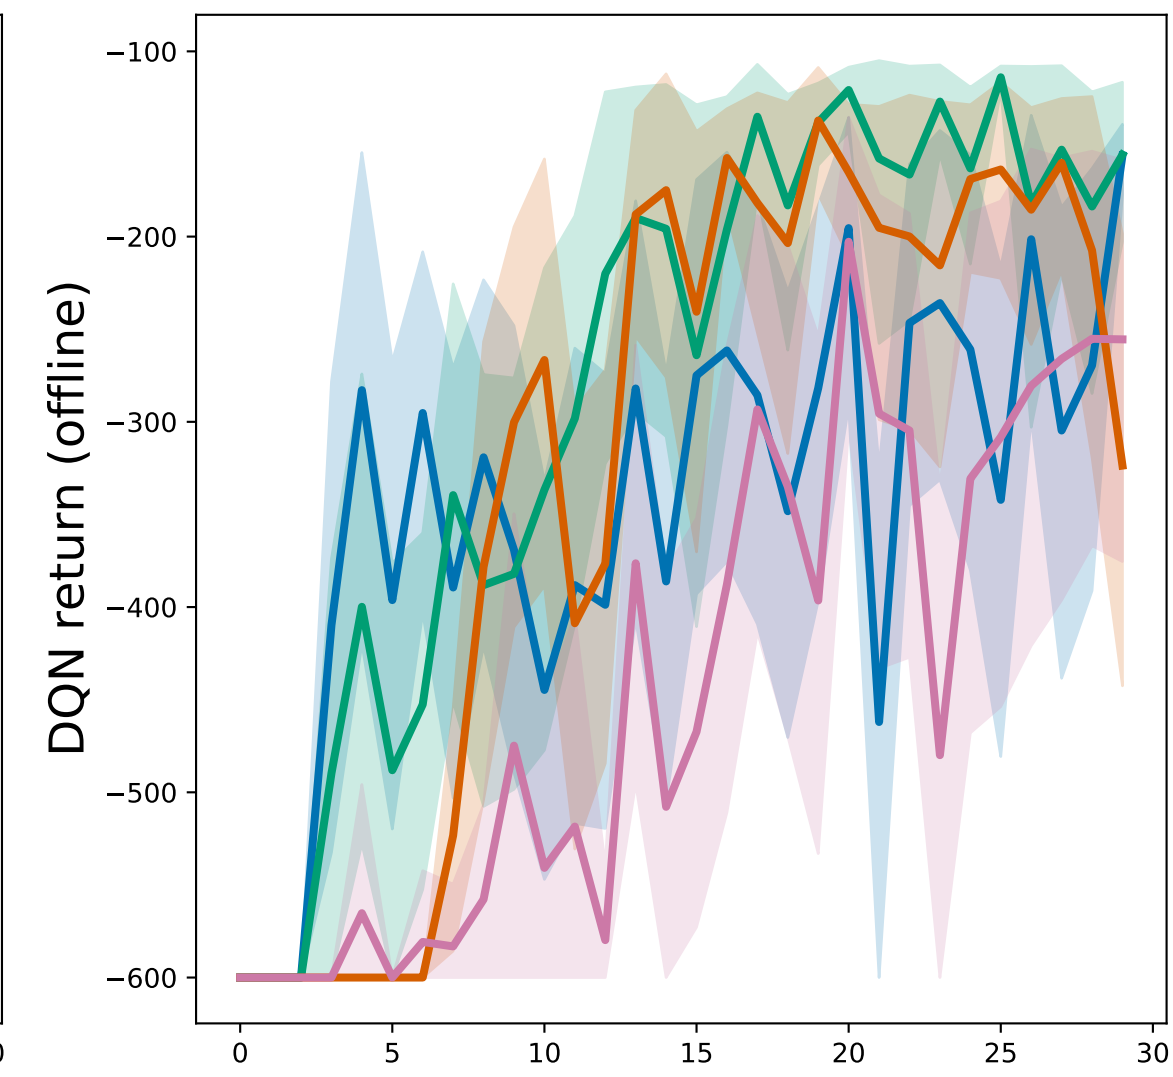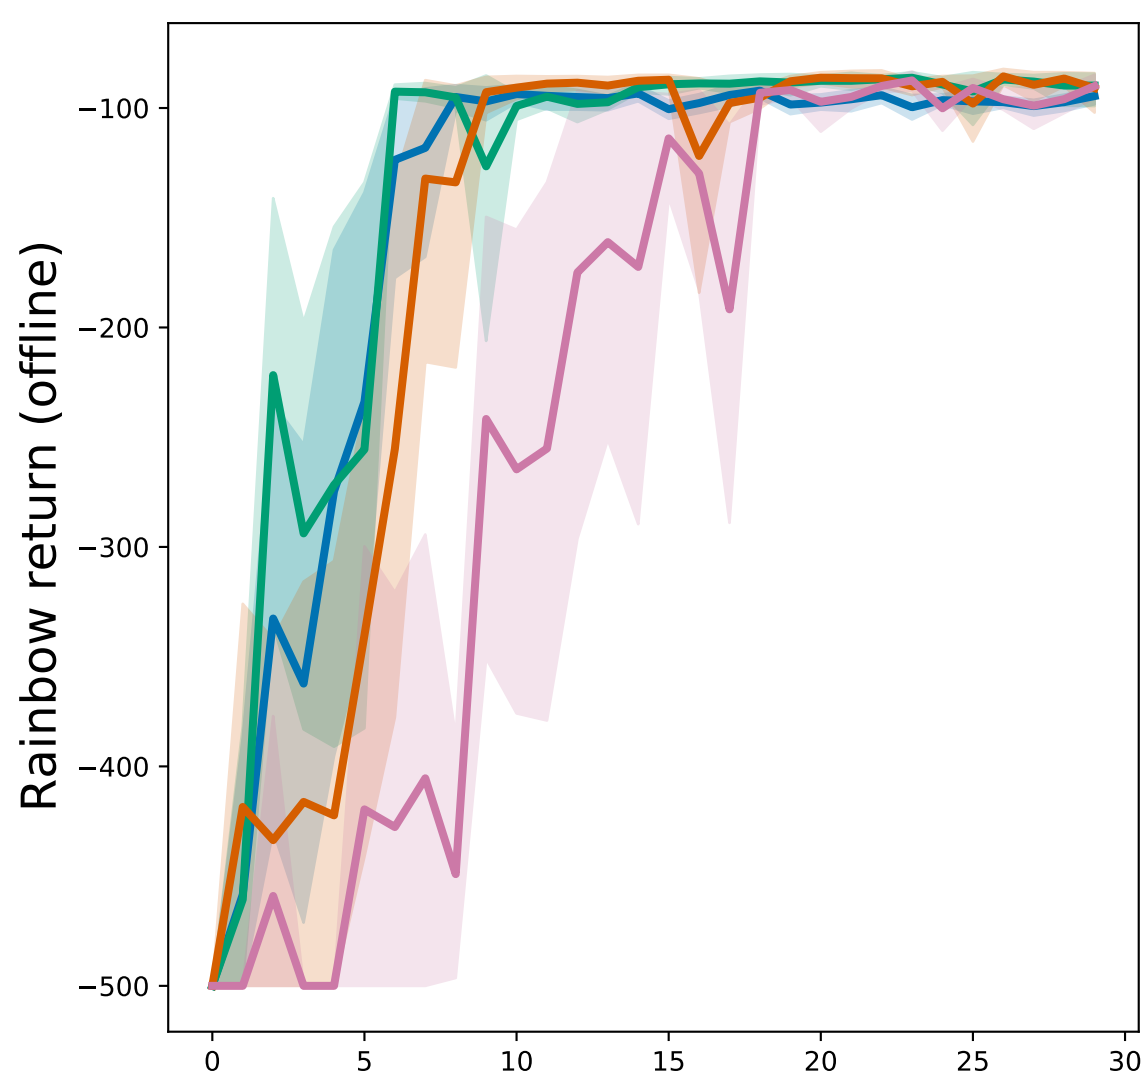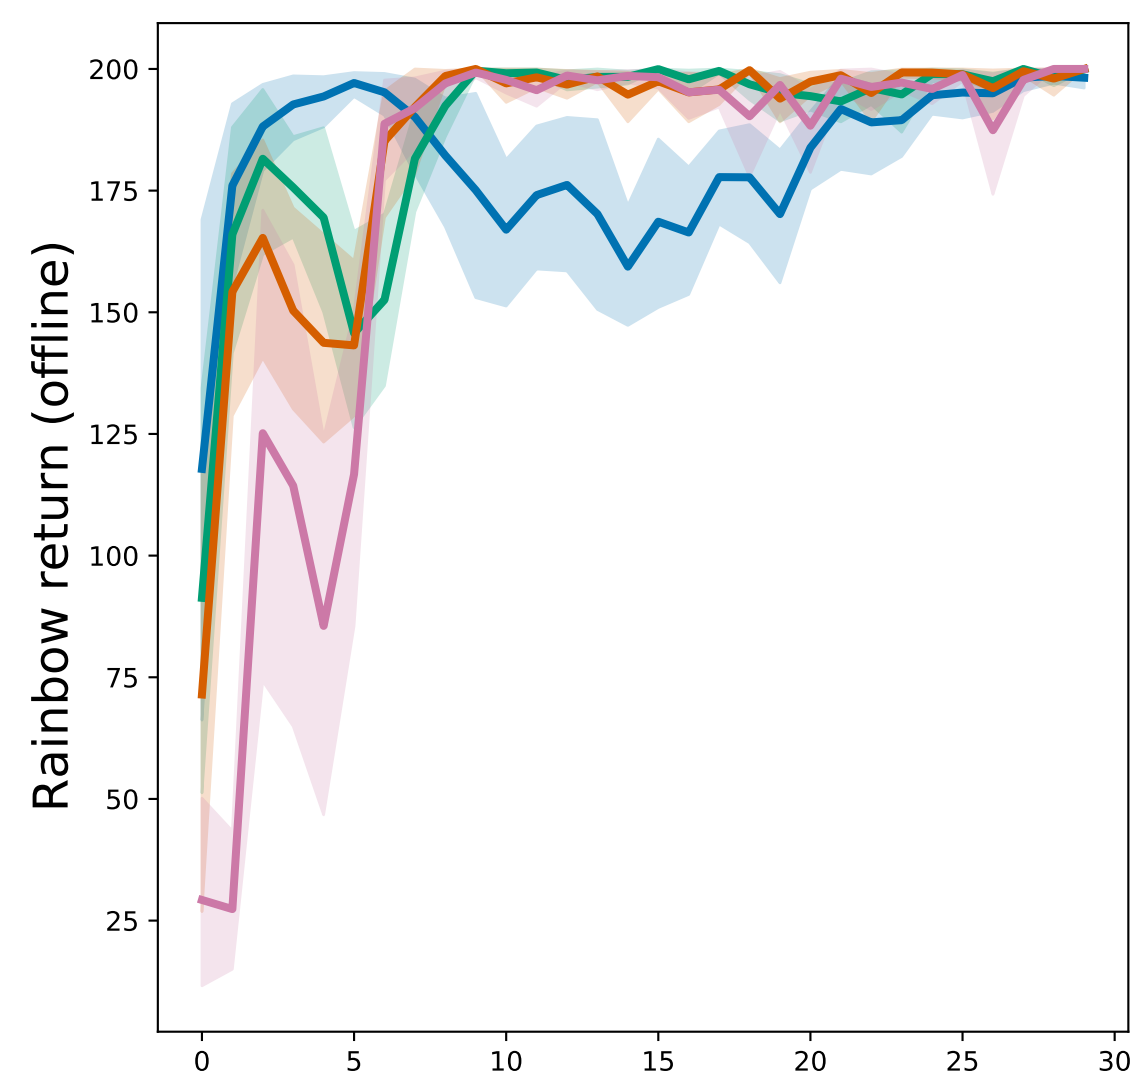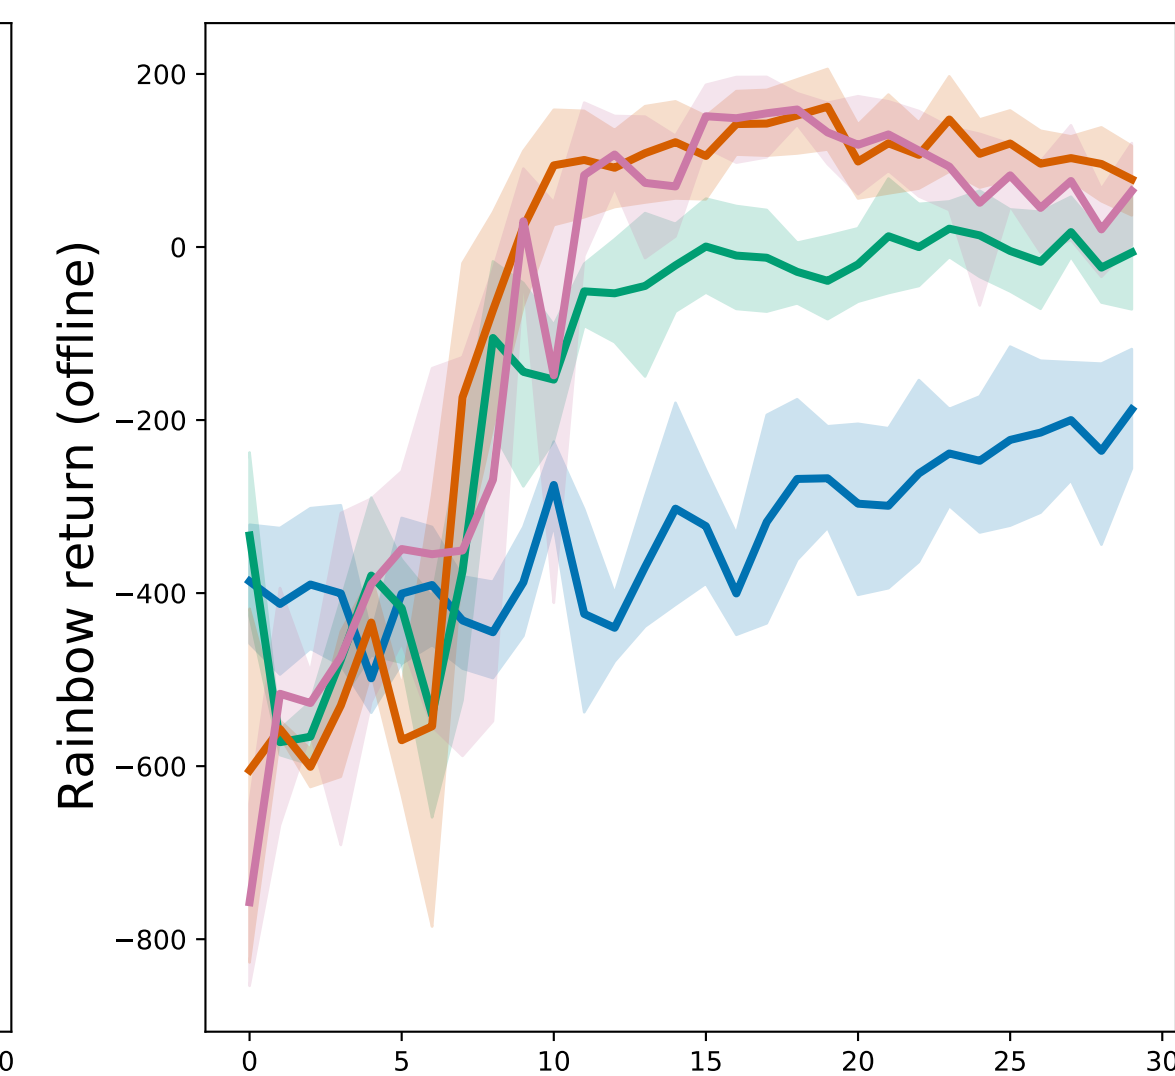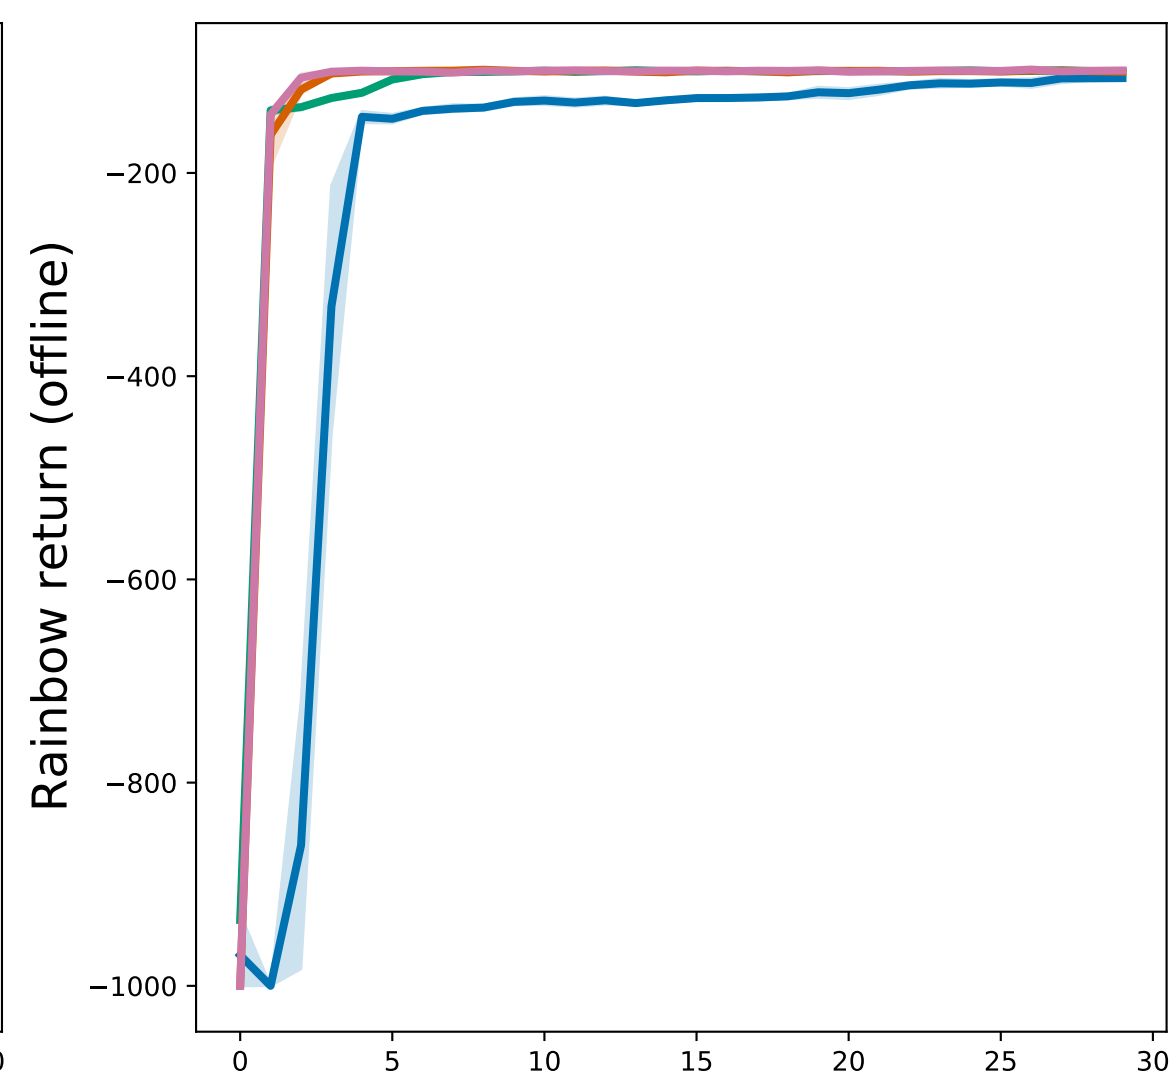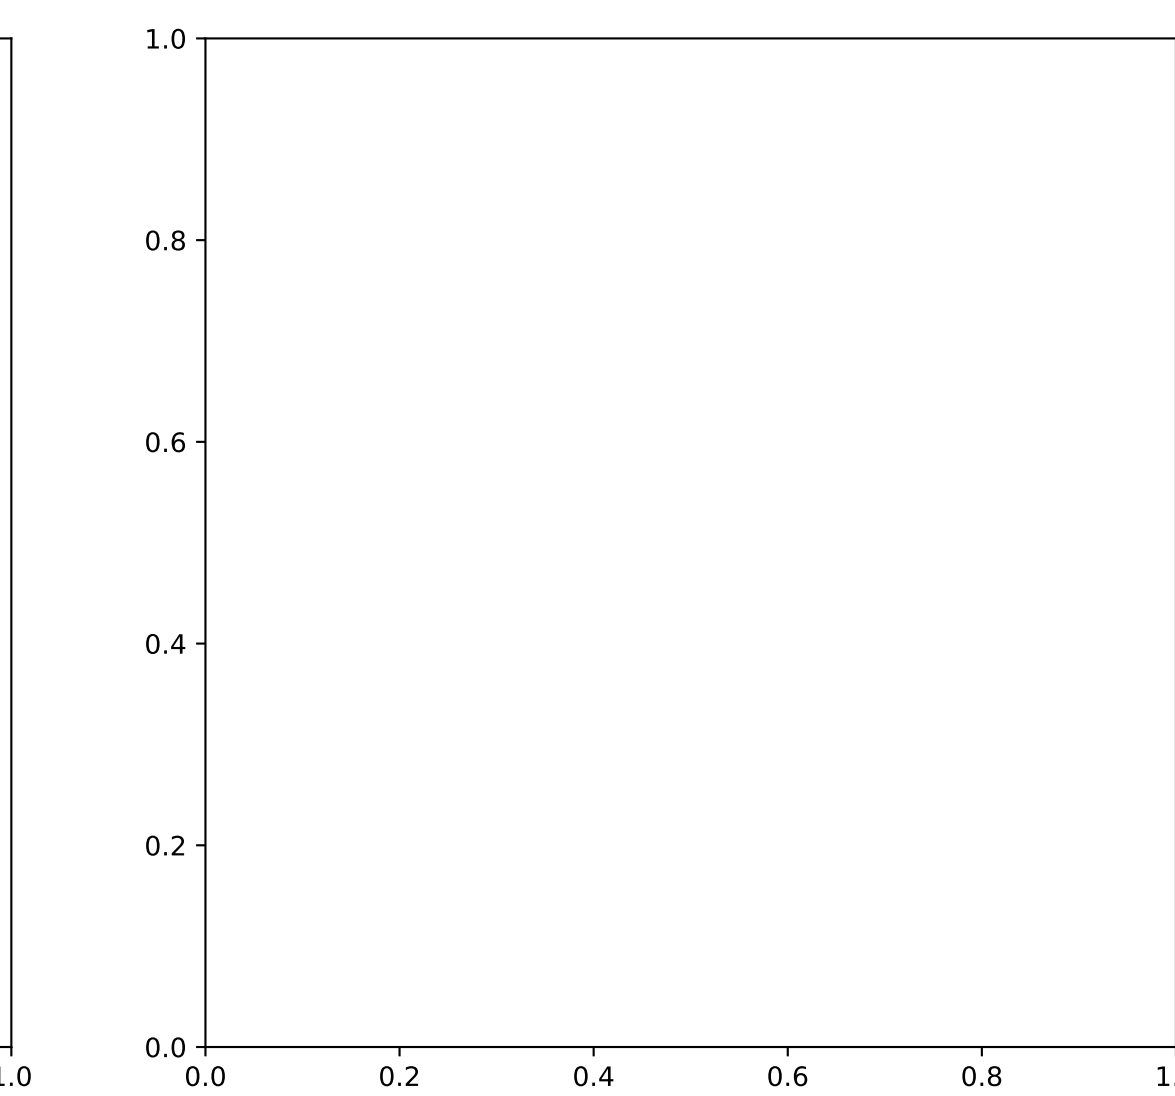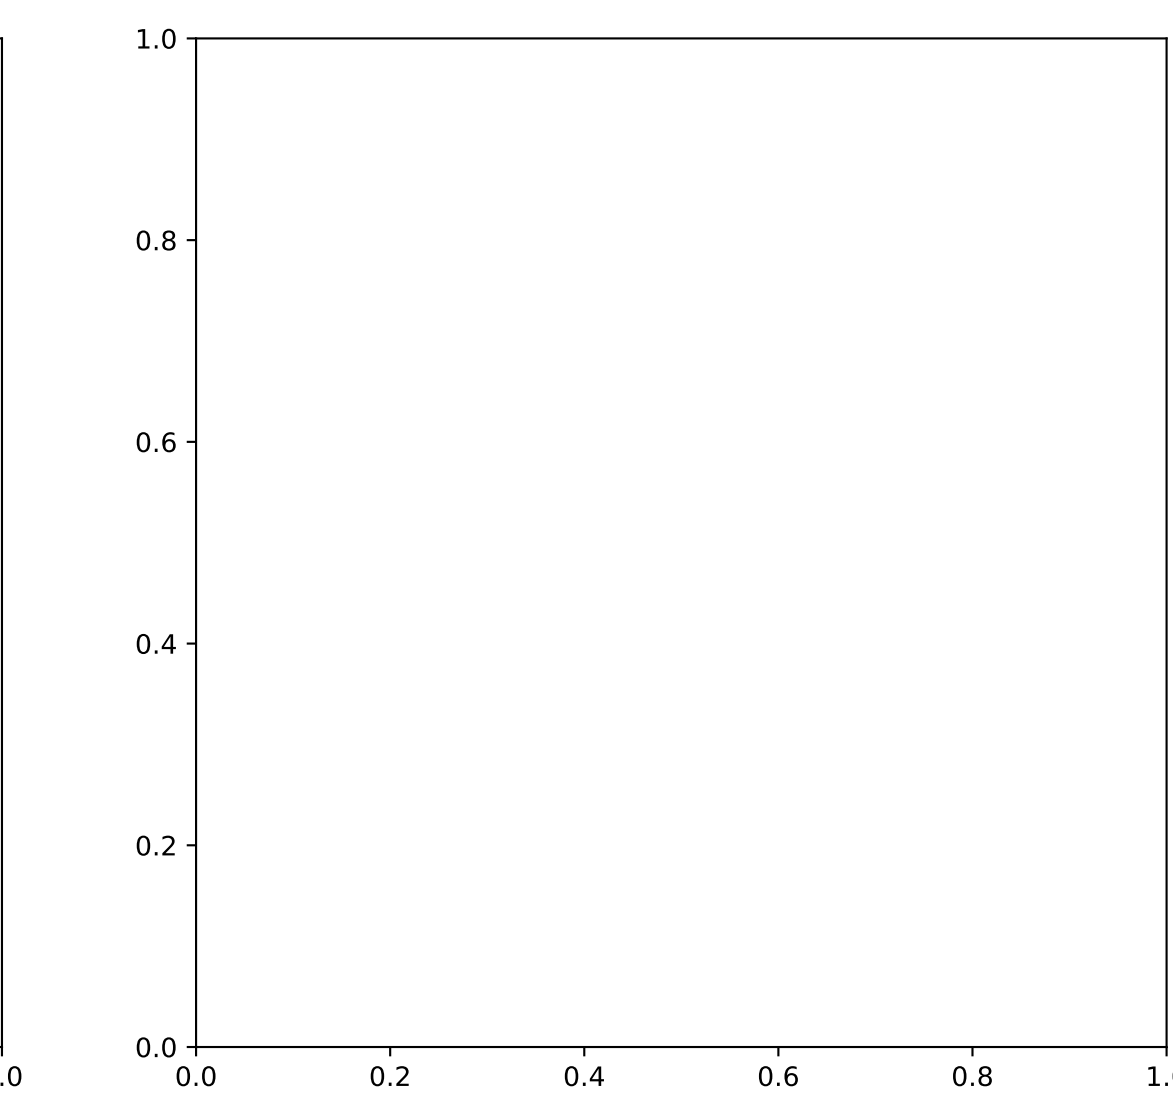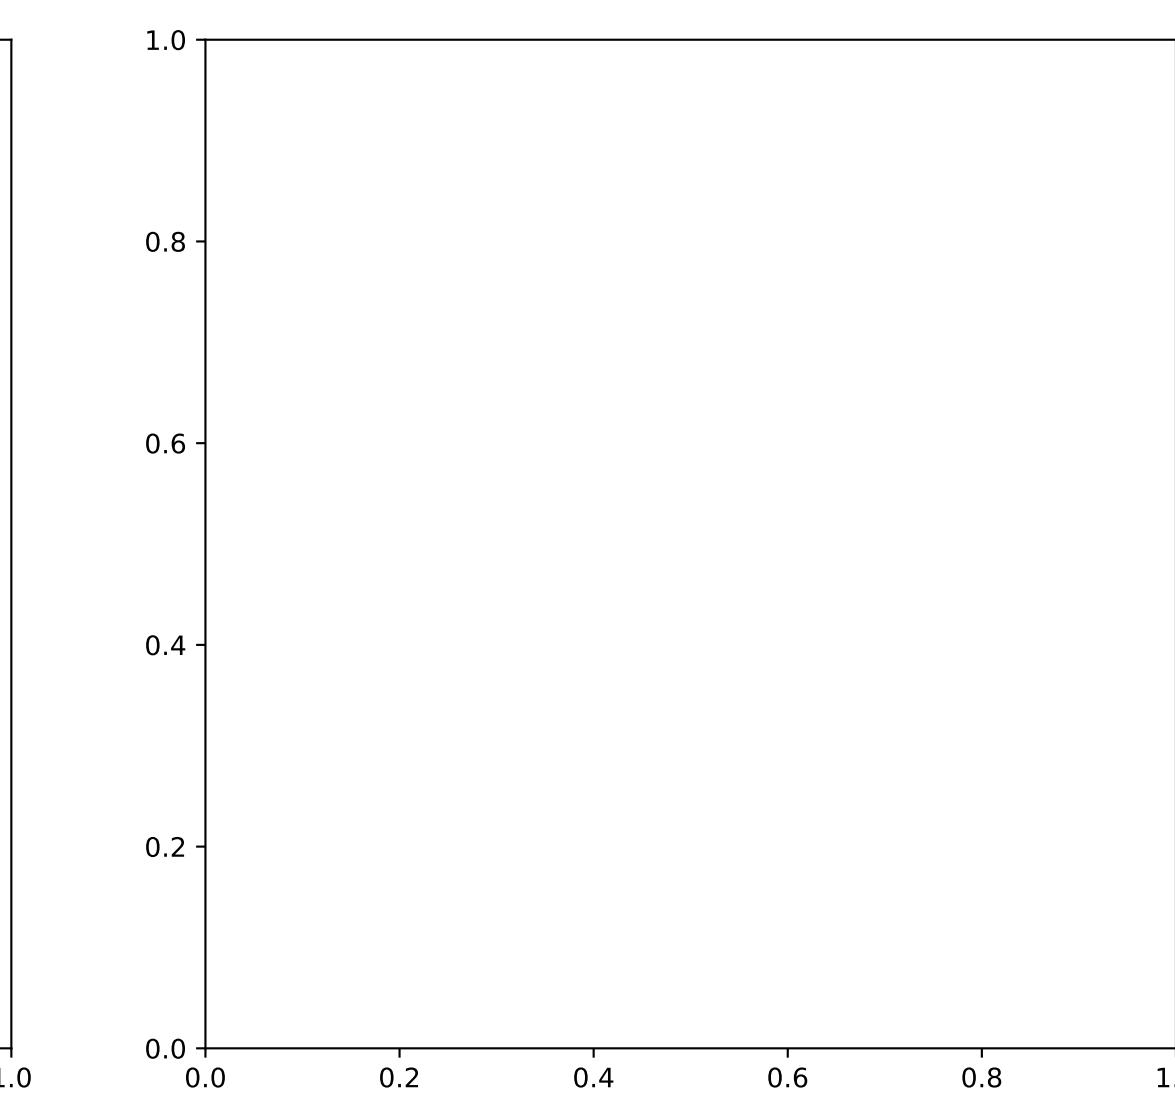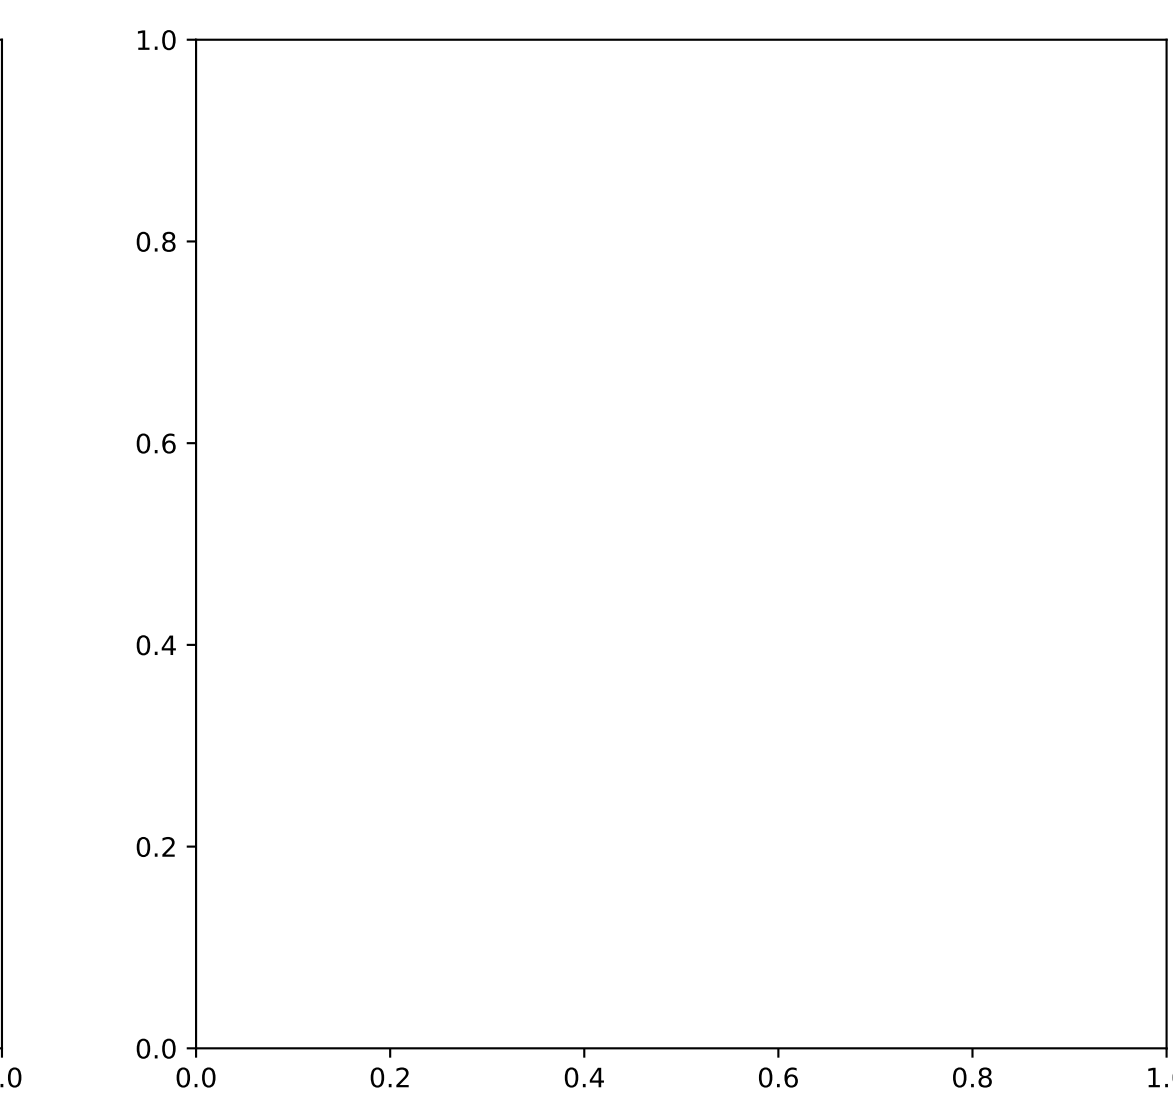

Supplement: supplementary_material [file attachment]

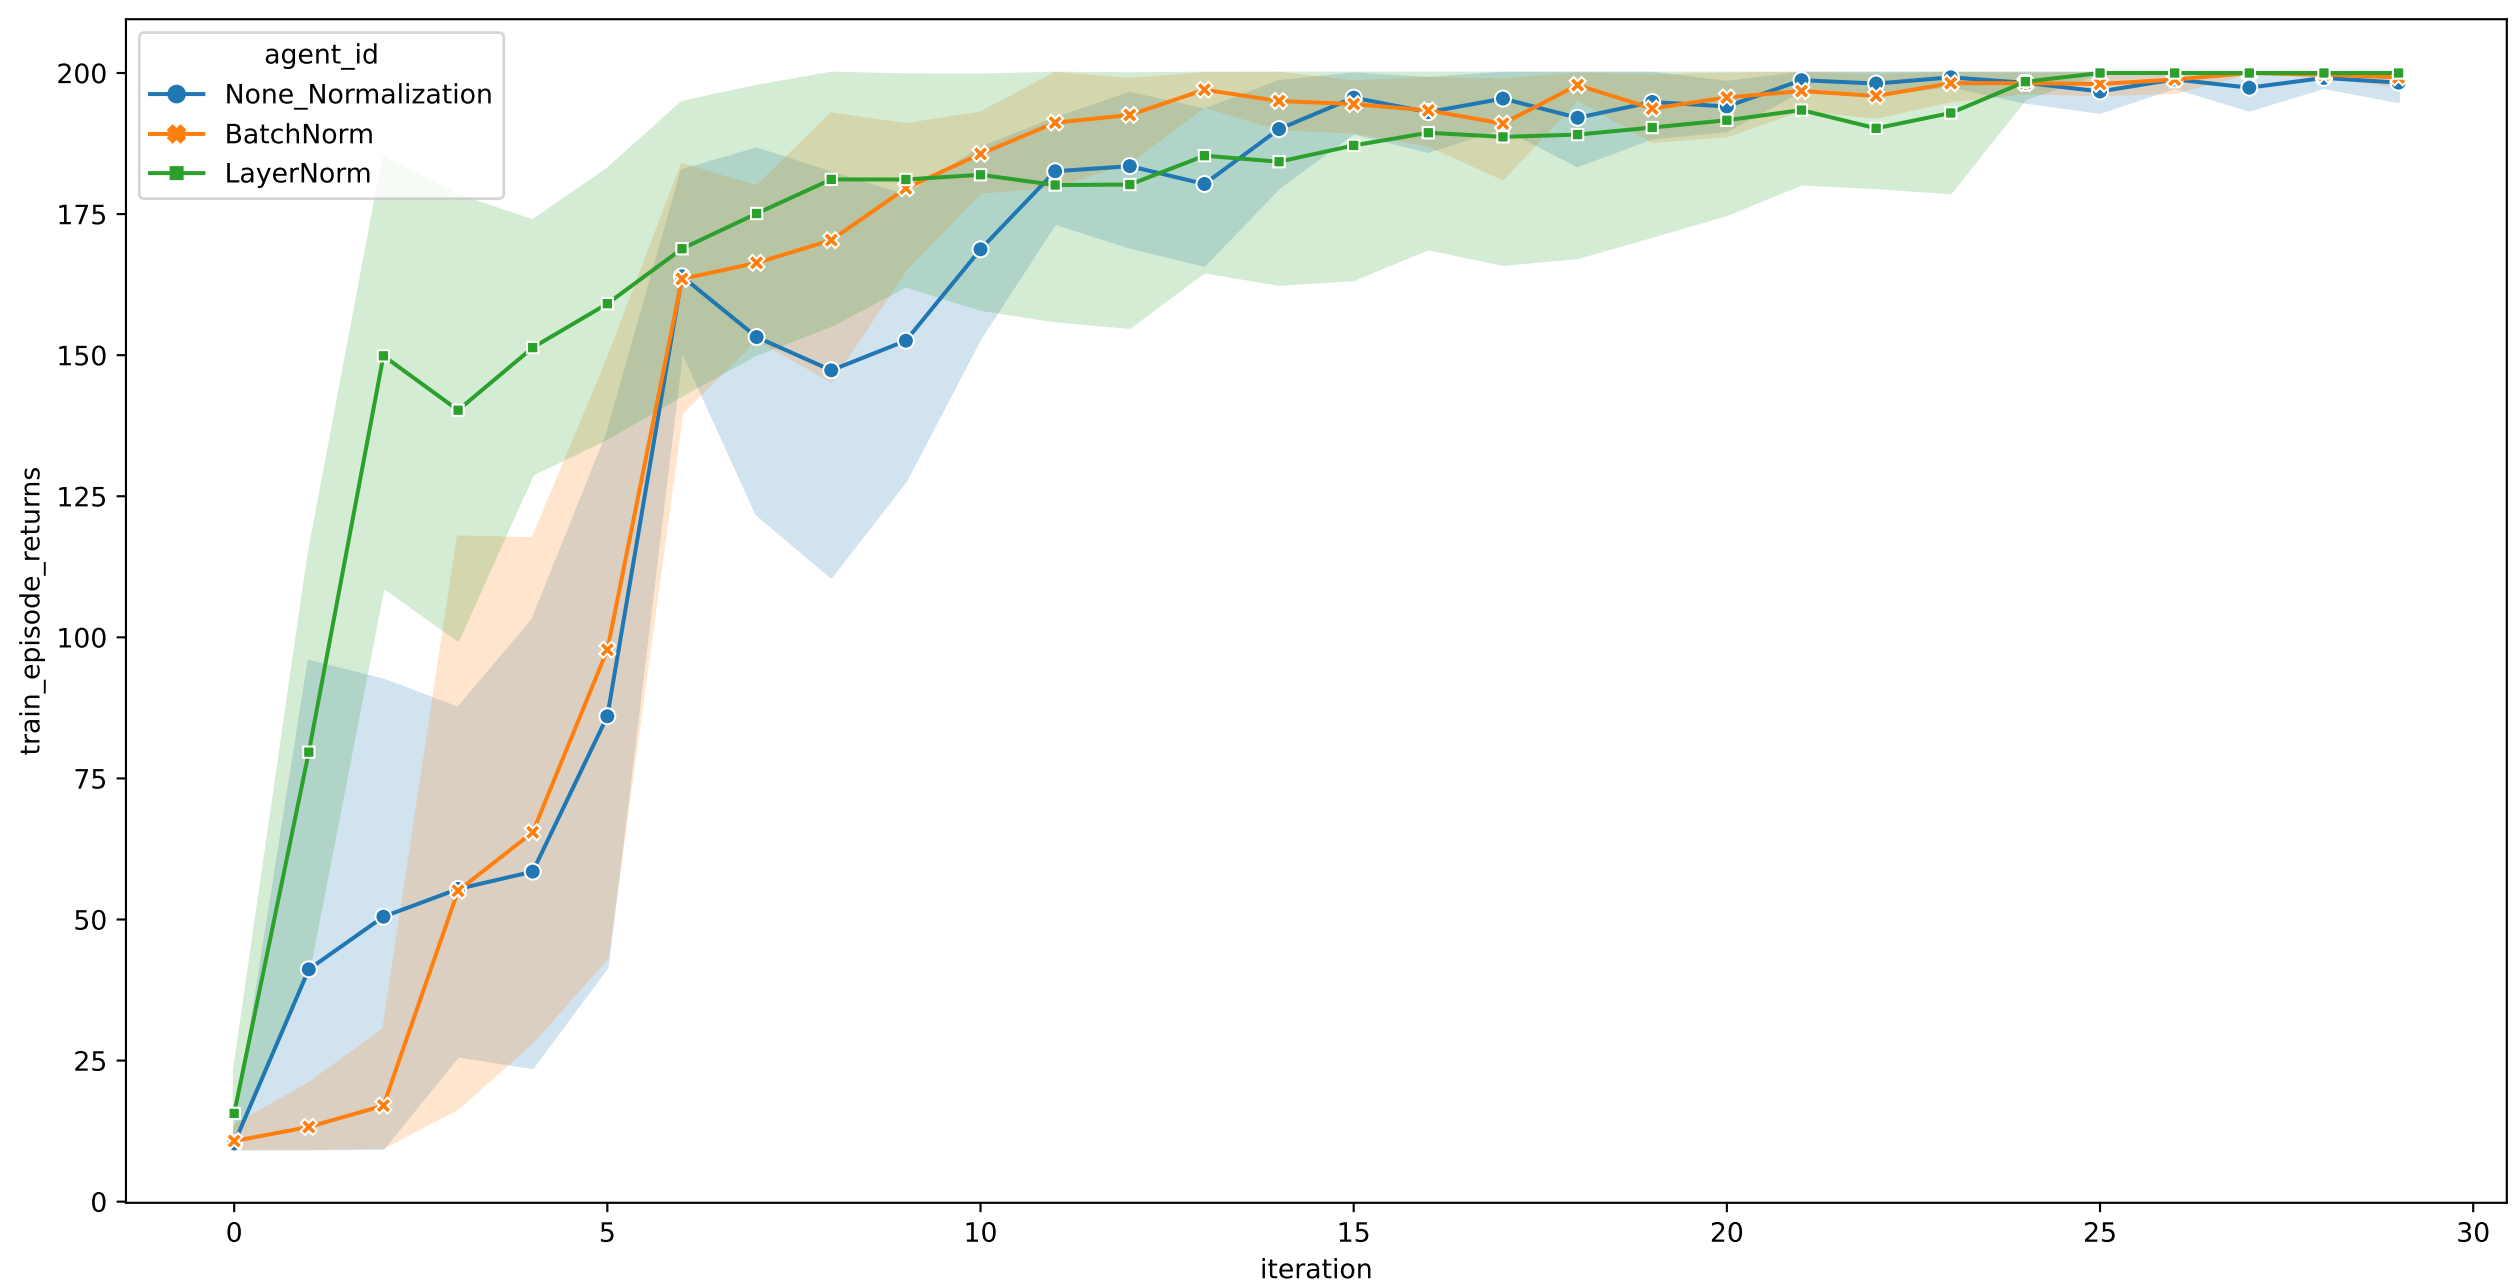

Supplement: supplementary_material [file attachment]

Acrobot

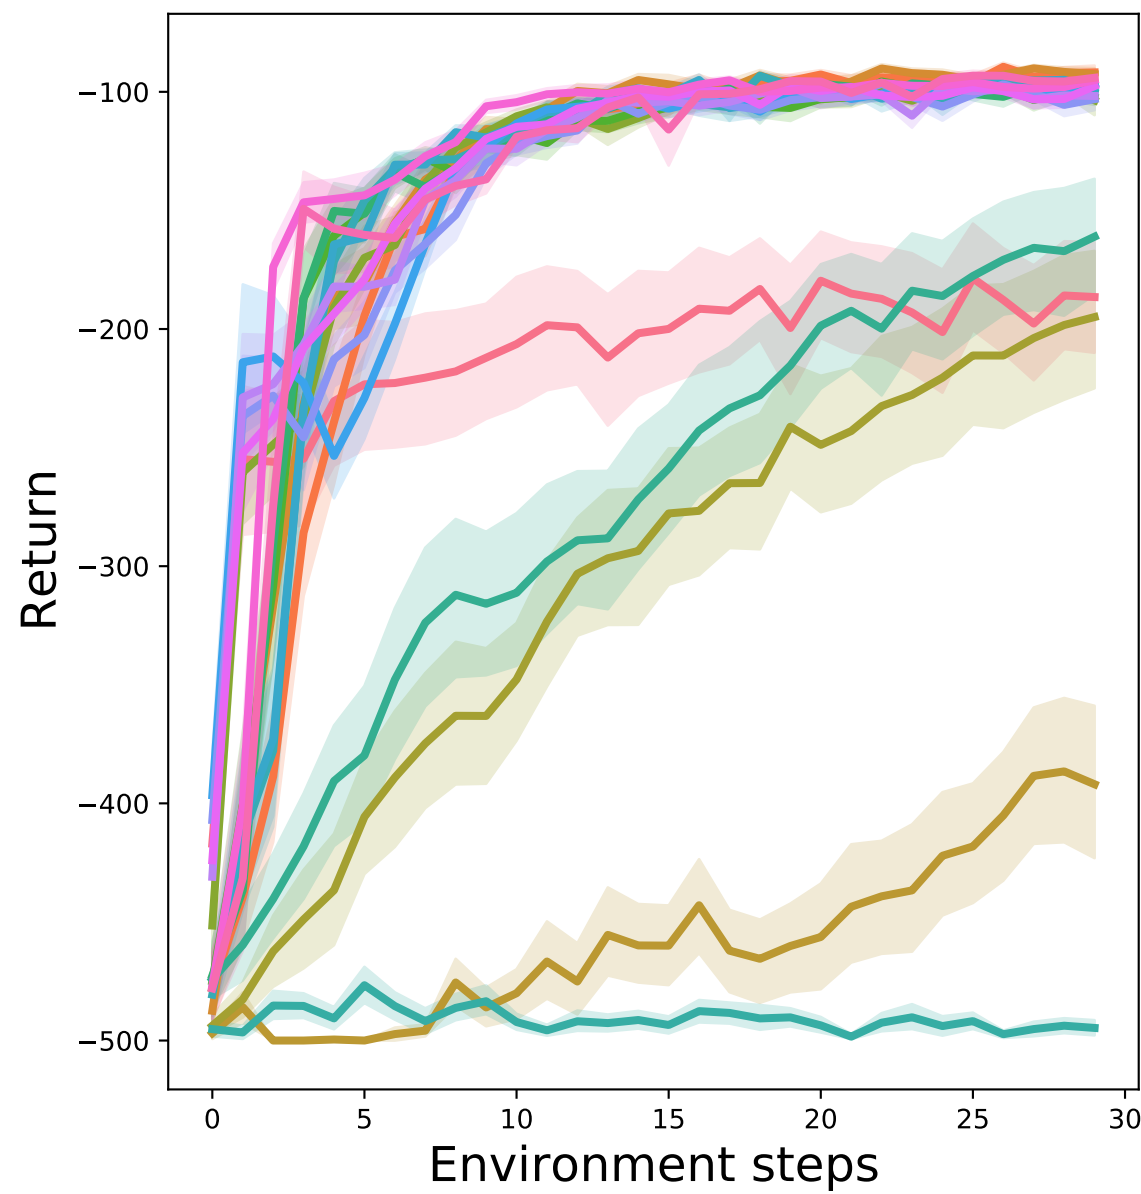

CartPole

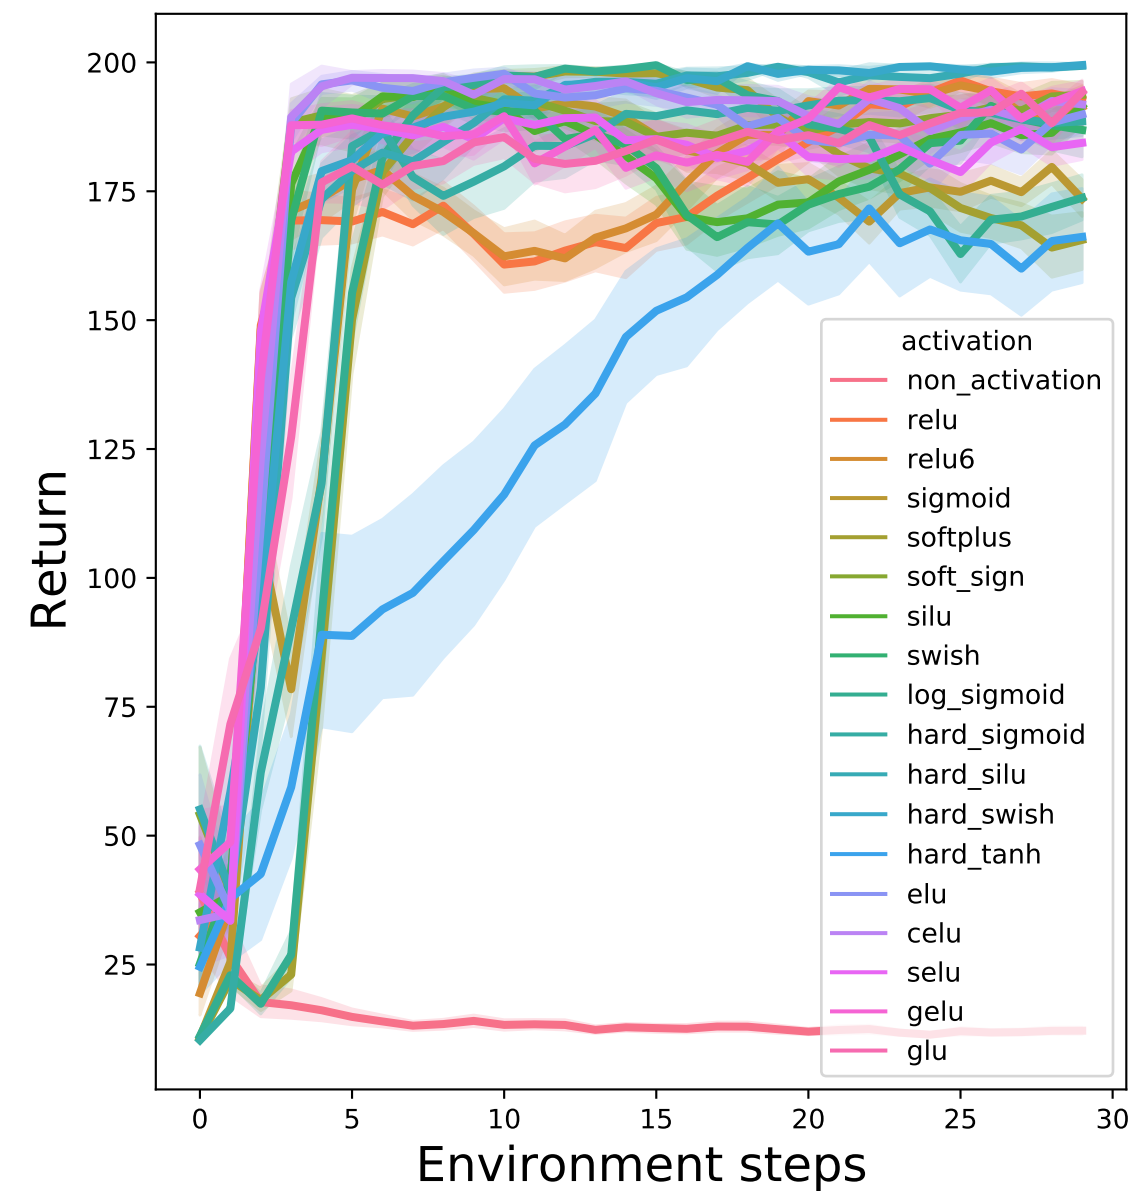

LunarLander

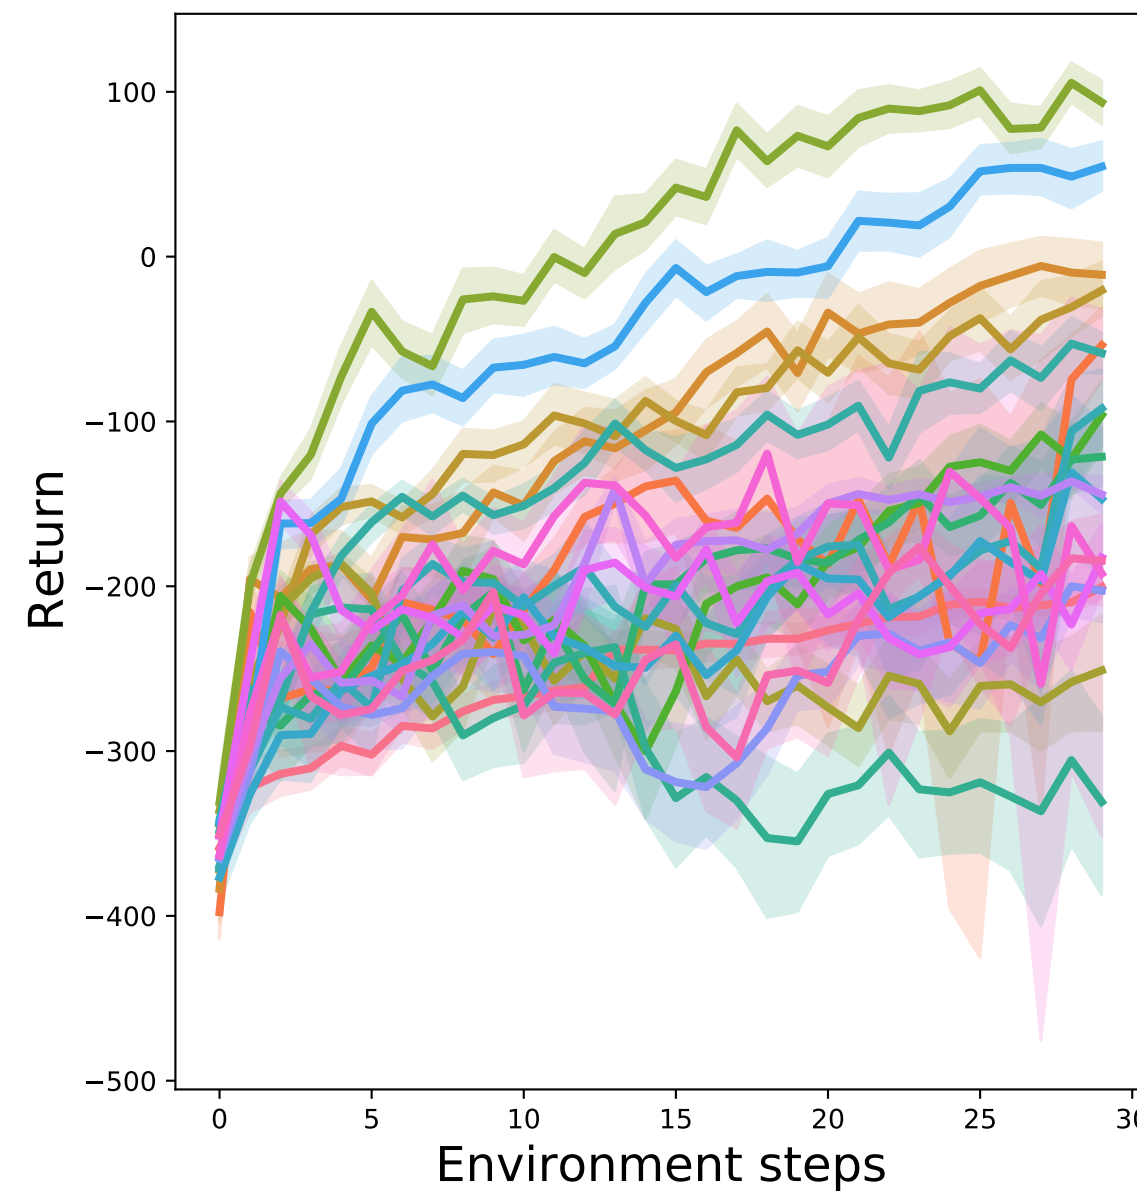

MountainCar

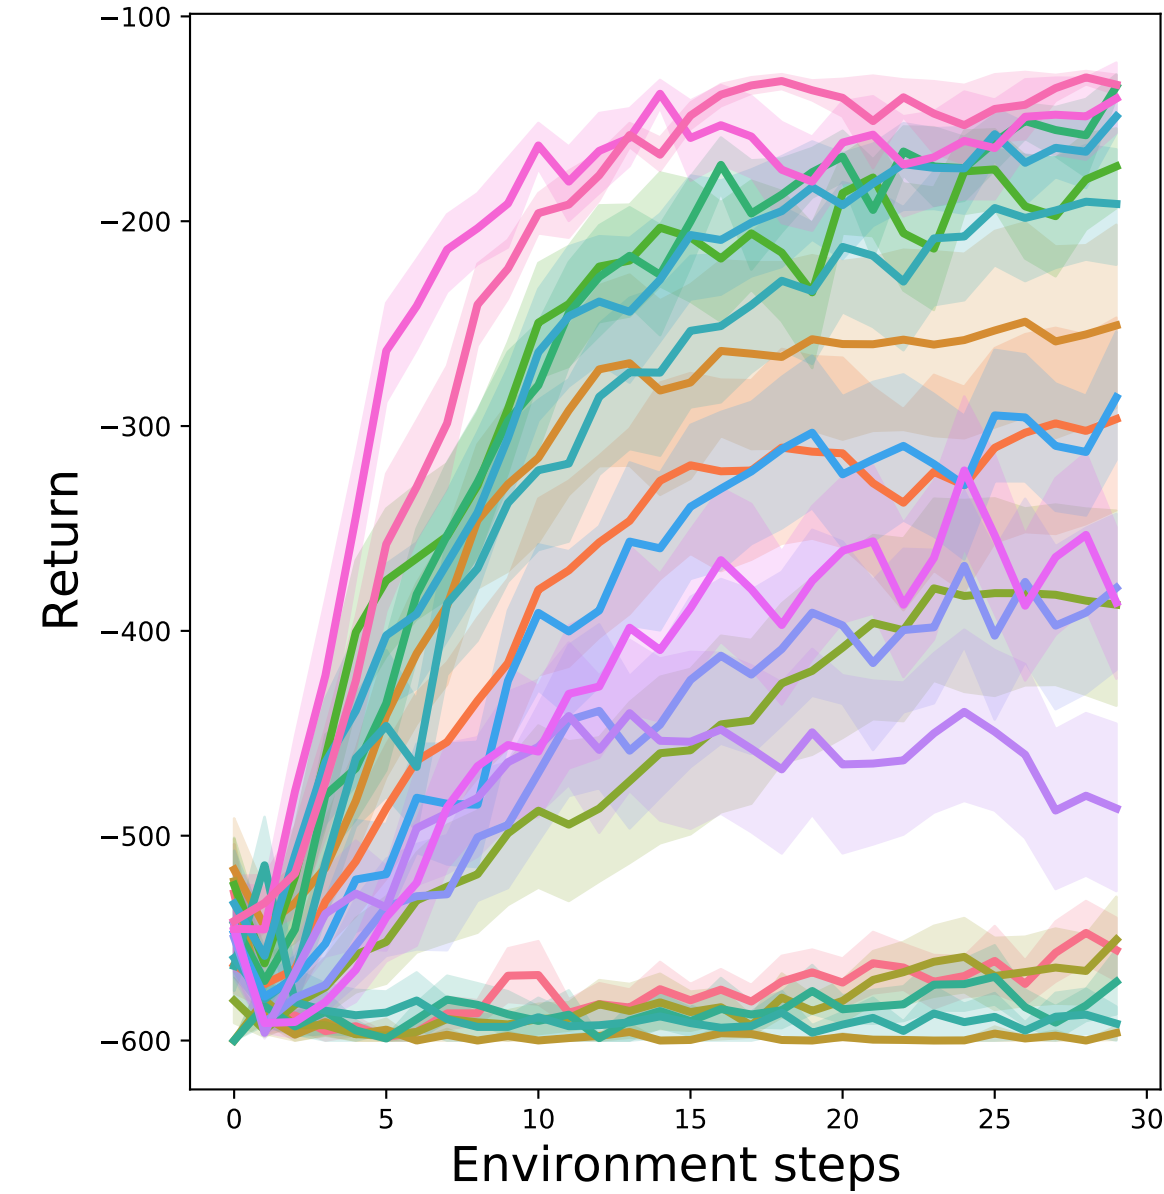

Acrobot

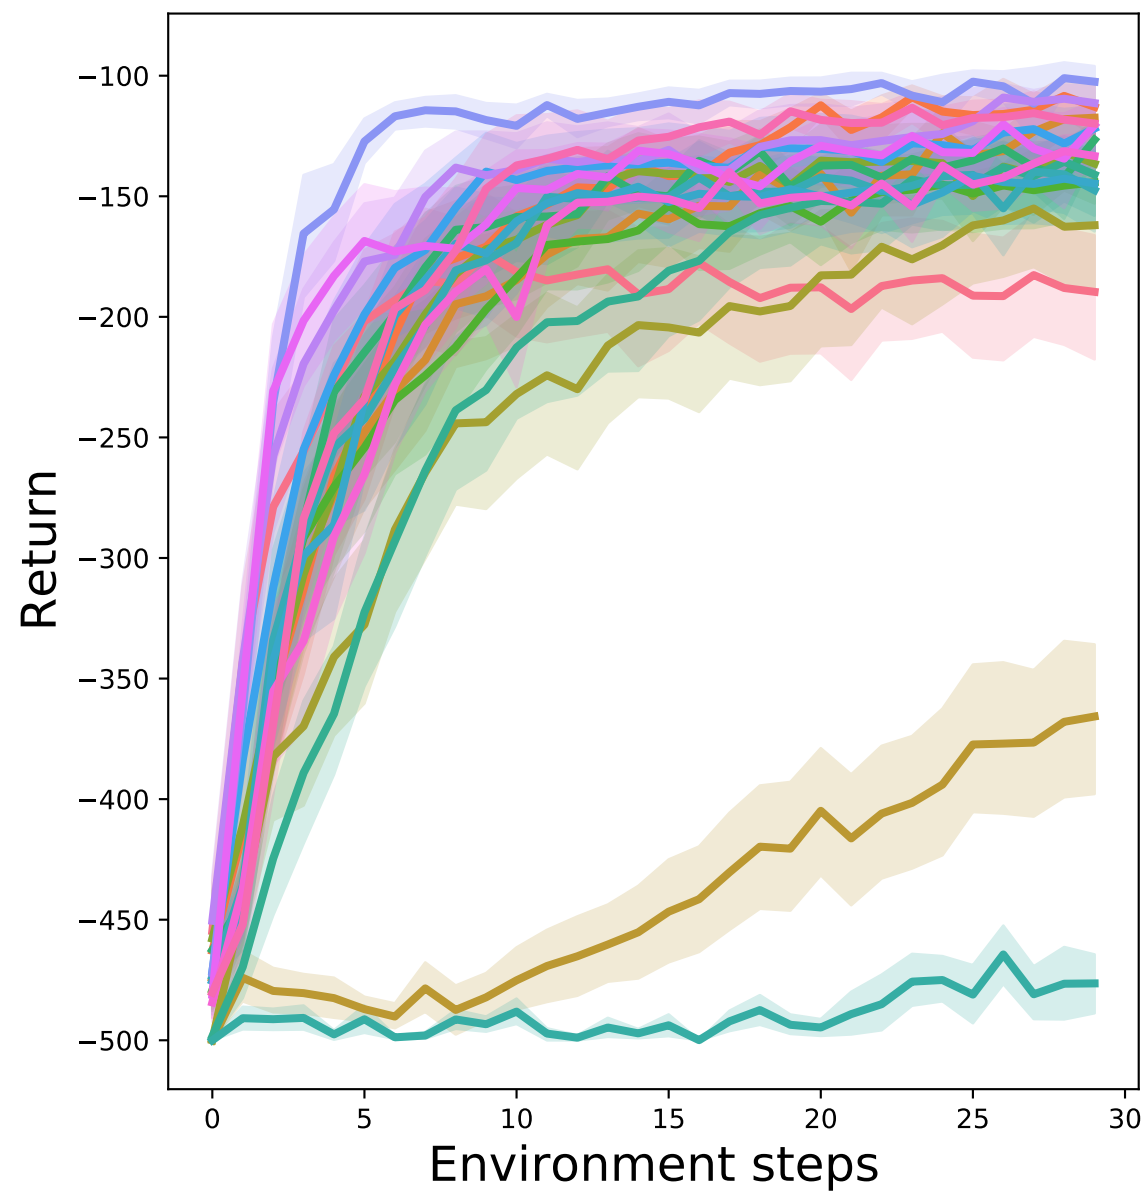

CartPole

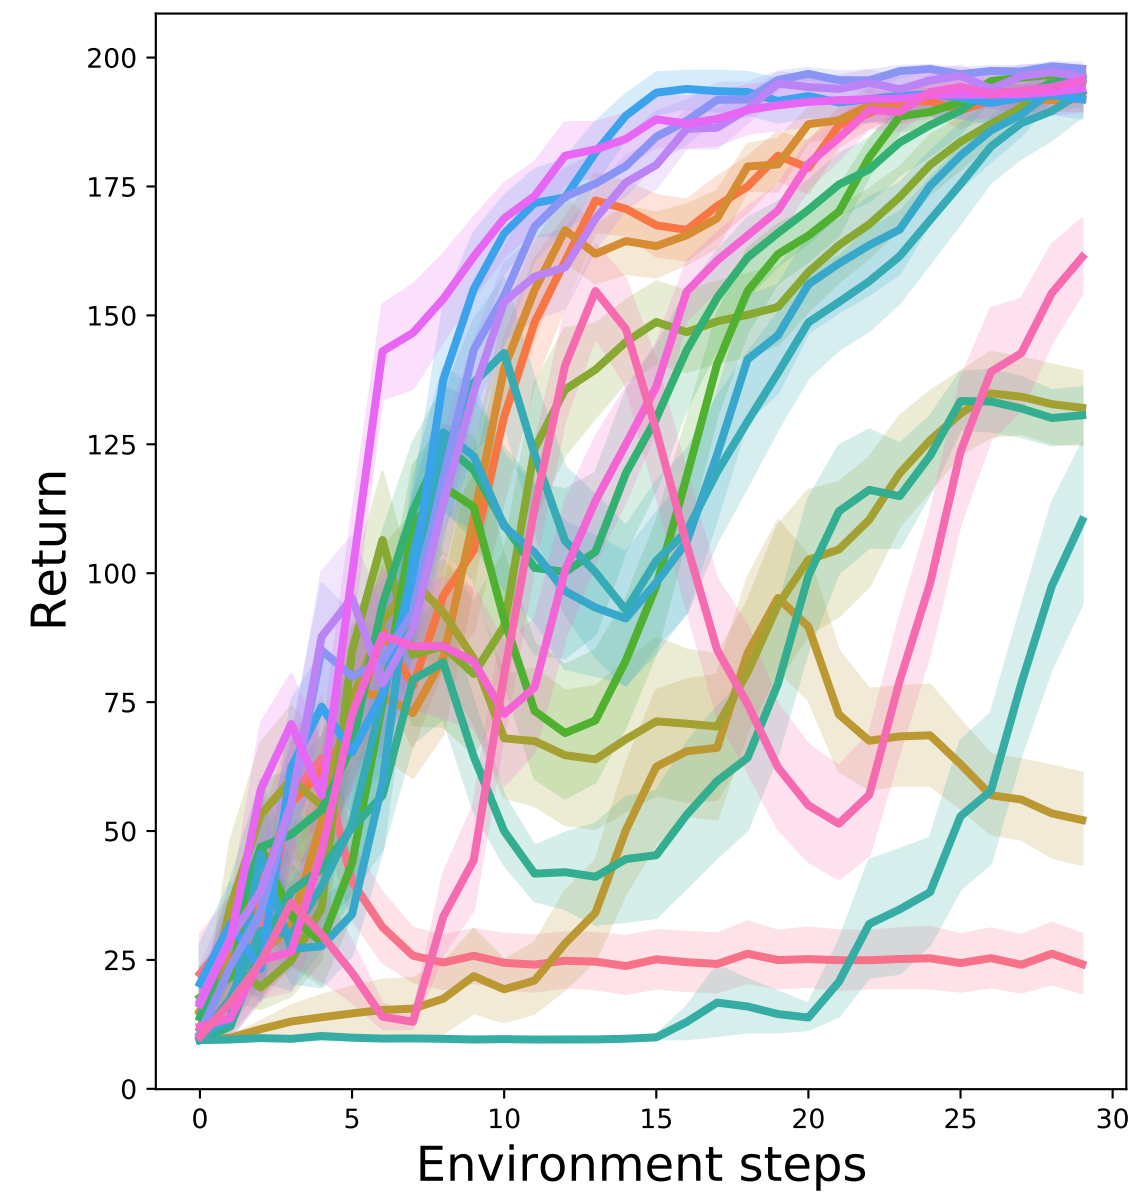

LunarLander

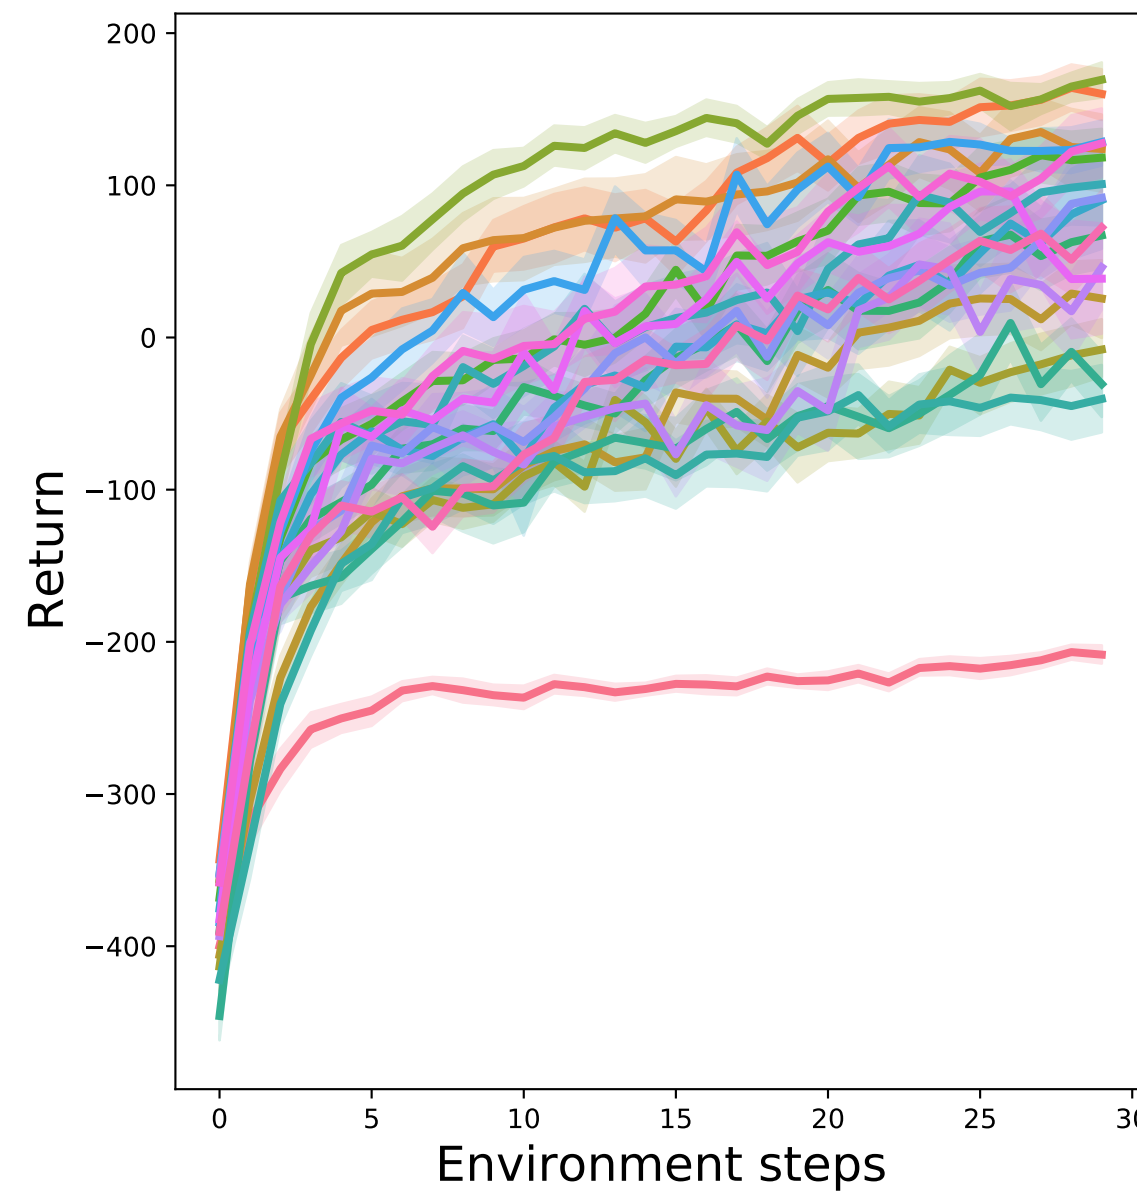

MountainCar

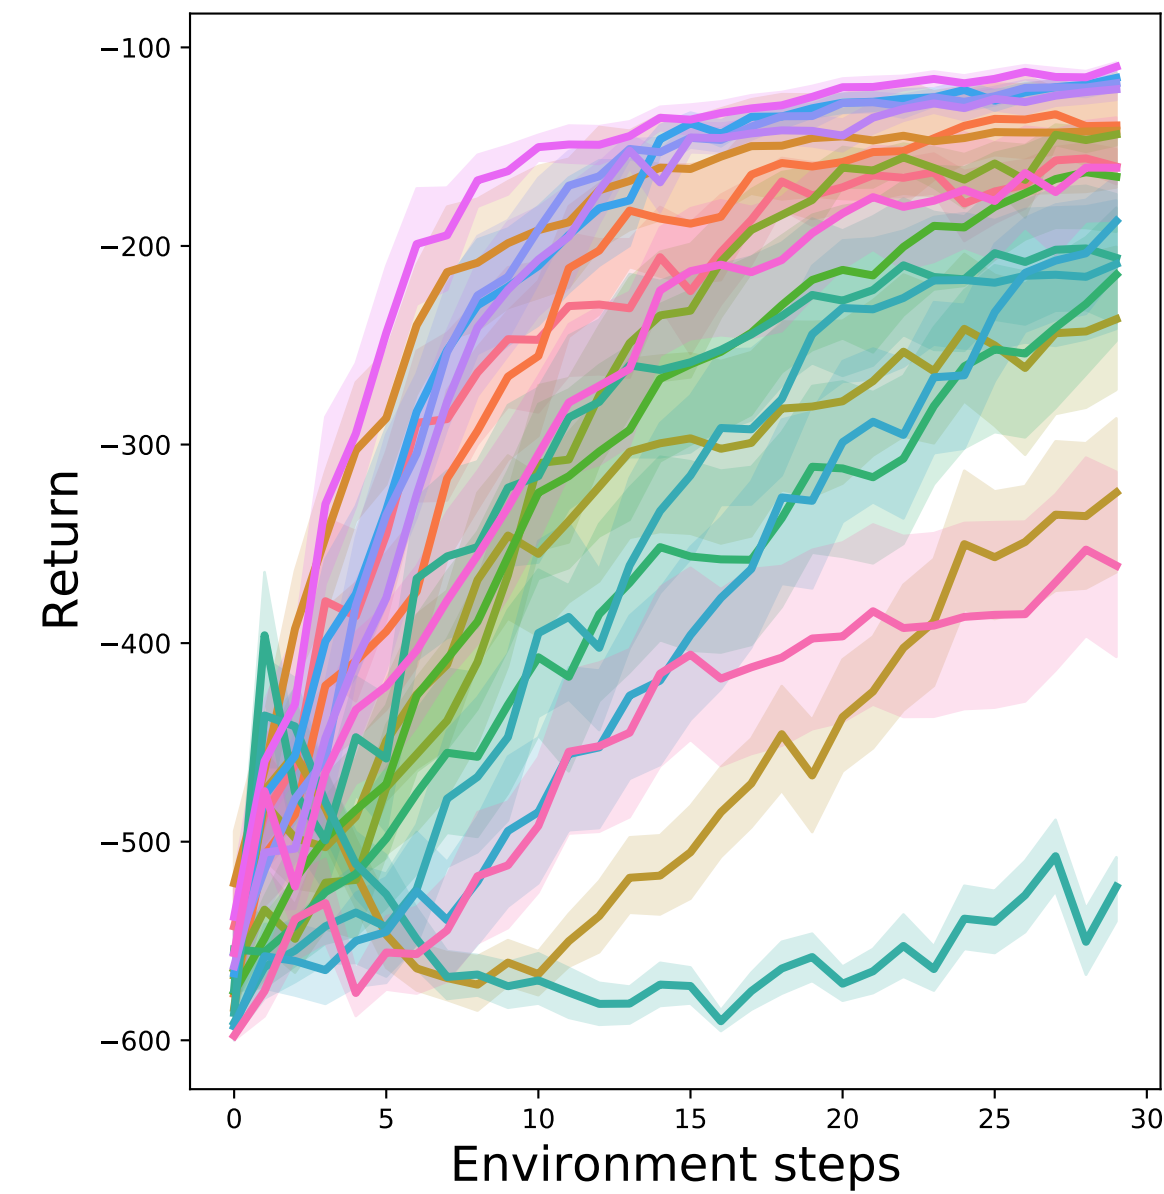

Supplement: supplementary_material [file attachment]

Acrobot

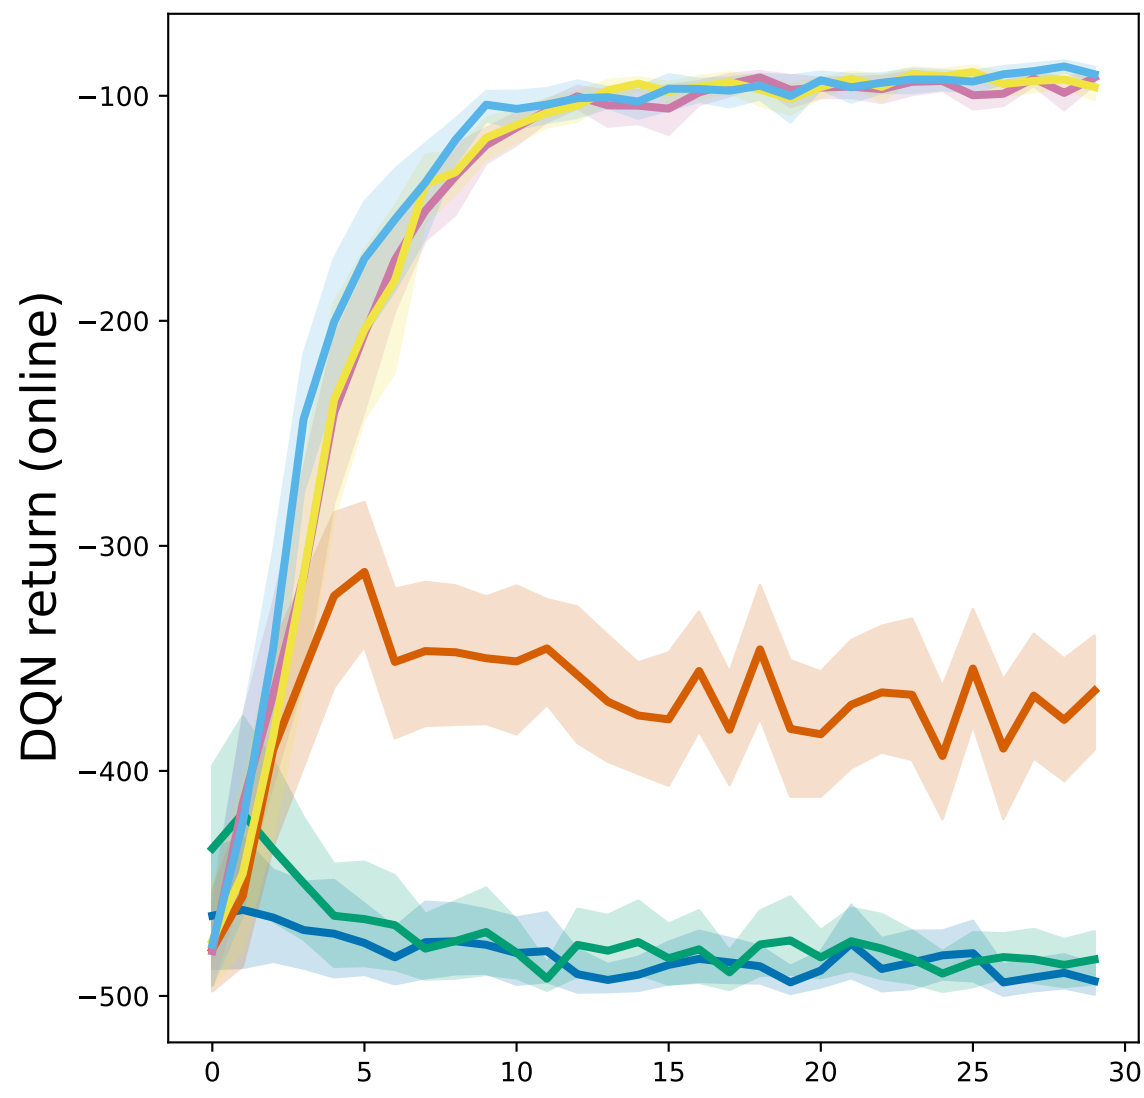

CartPole

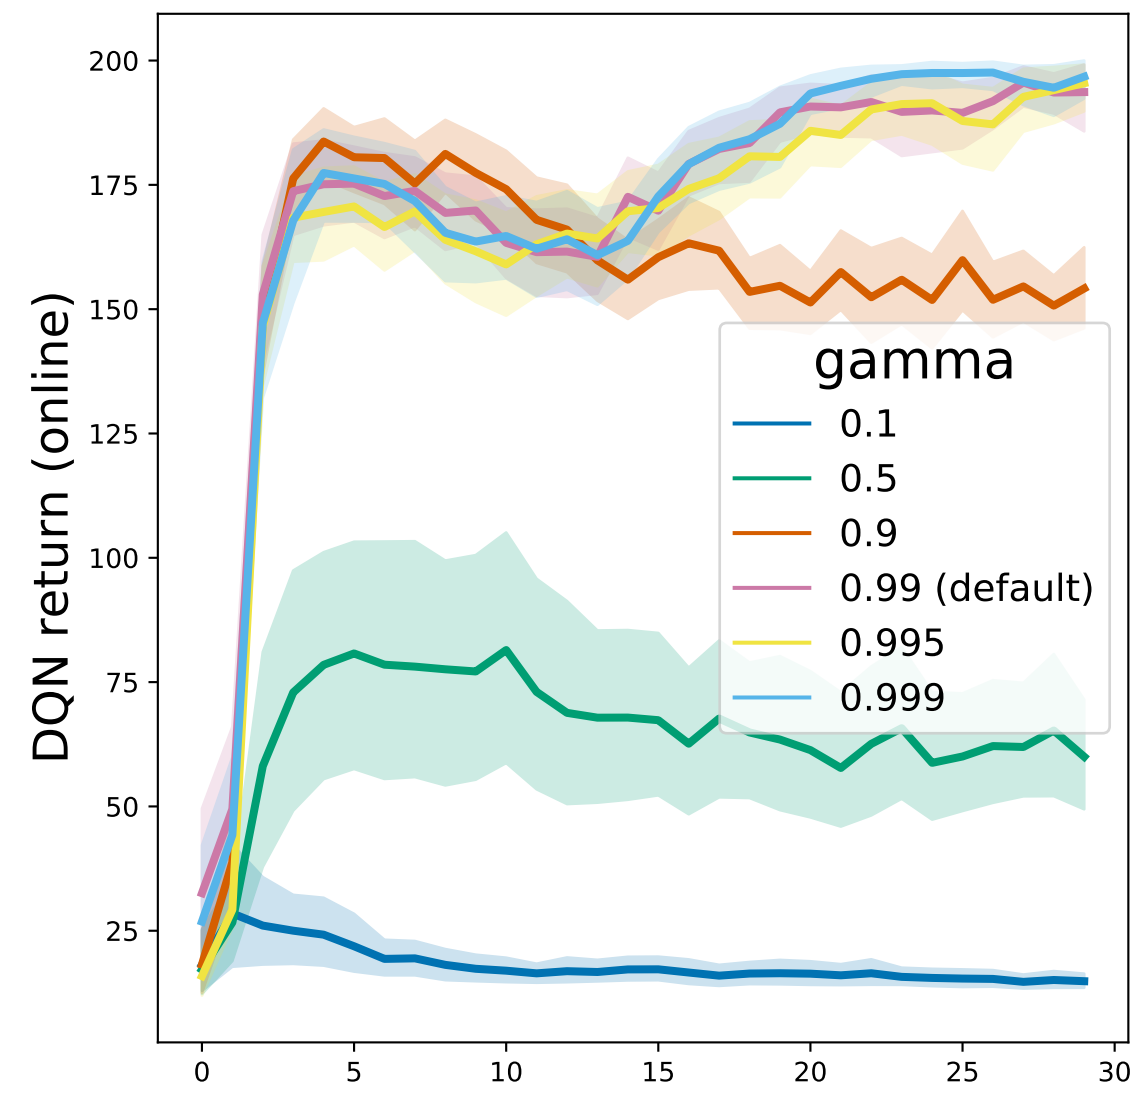

LunarLander

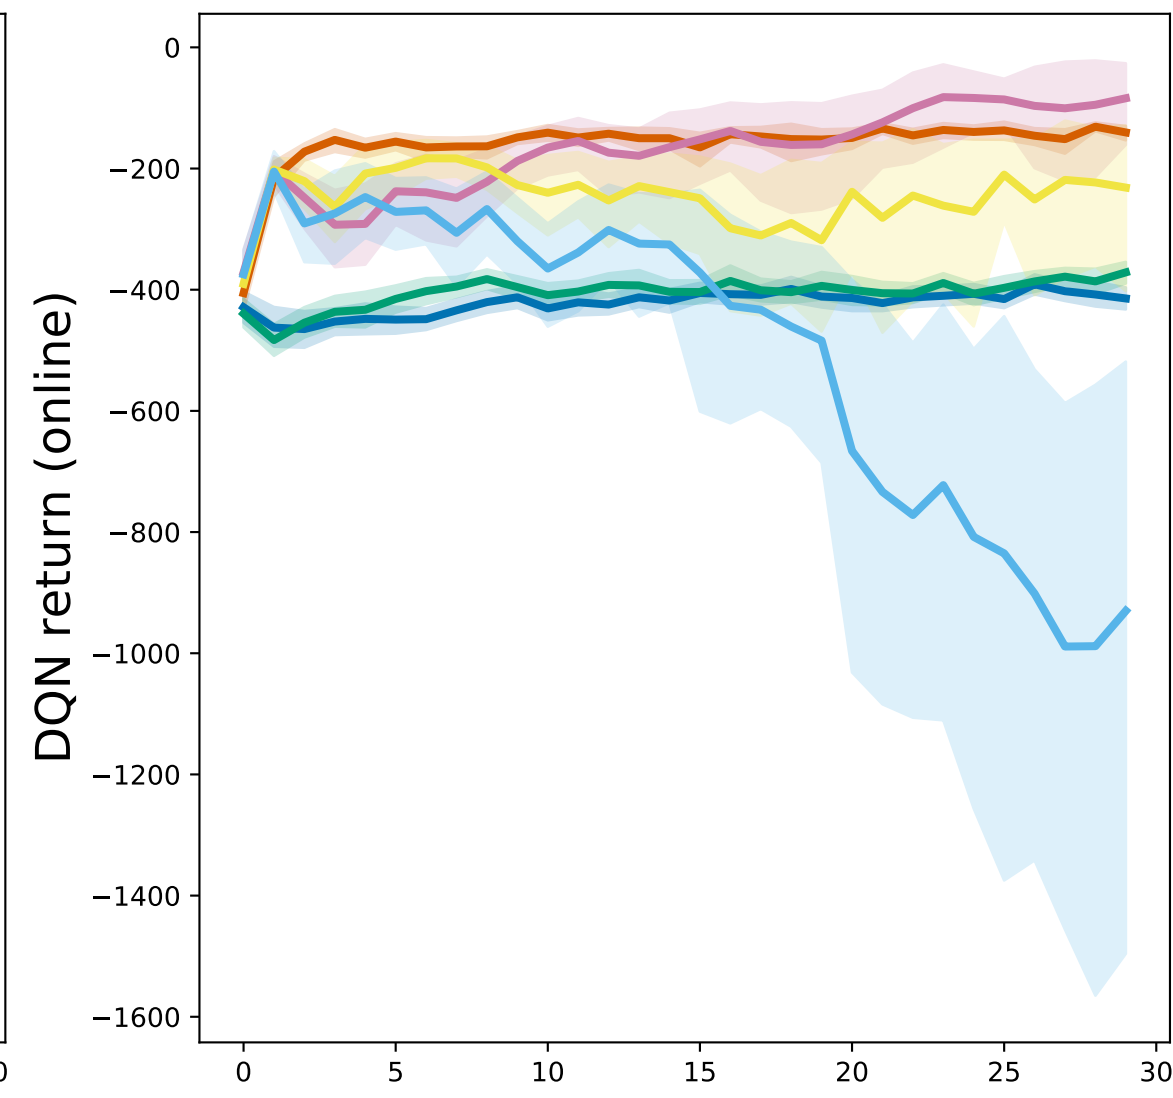

MountainCar

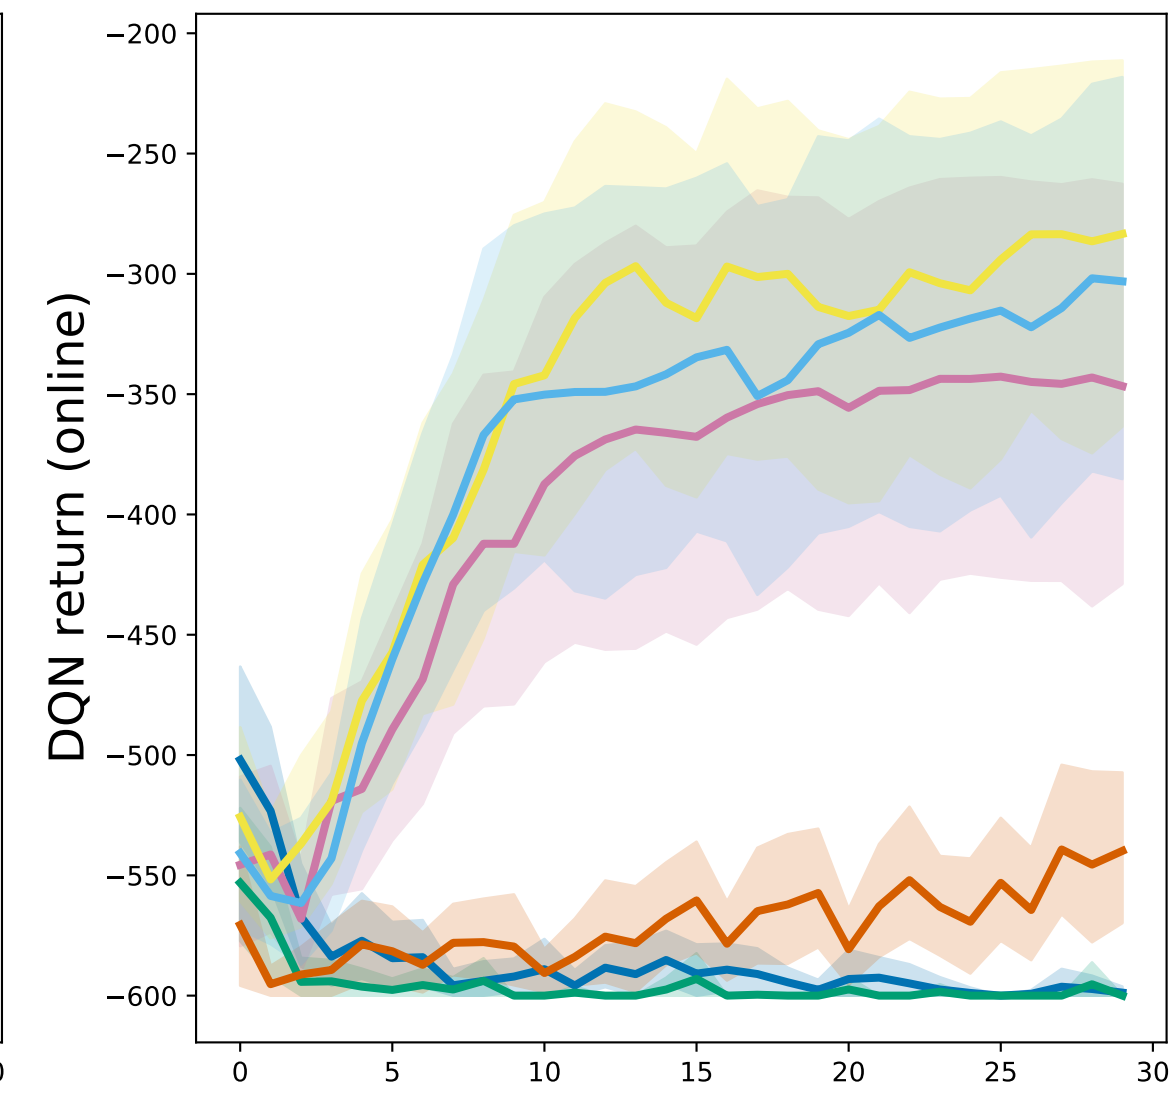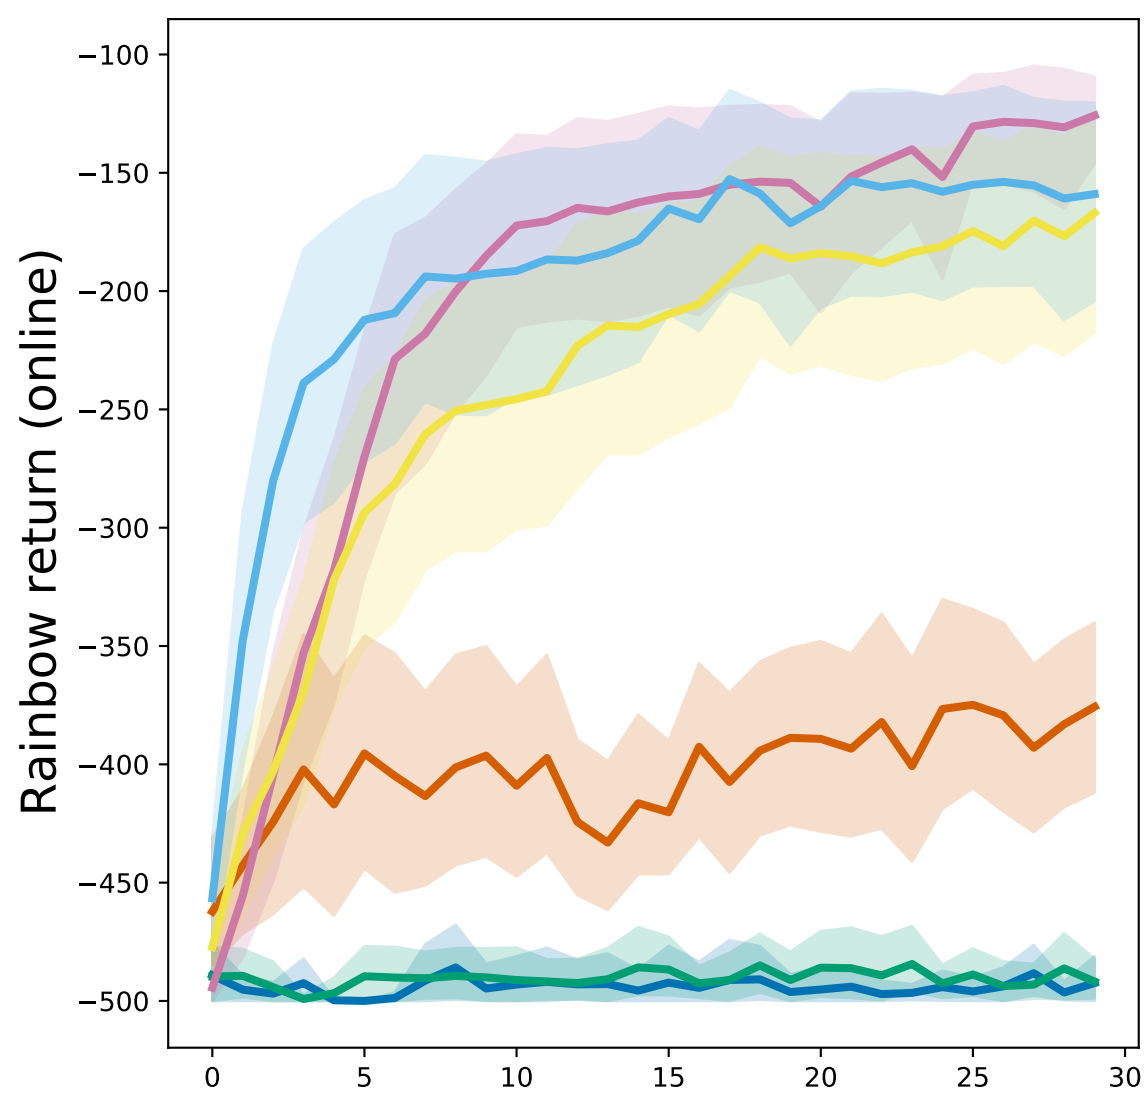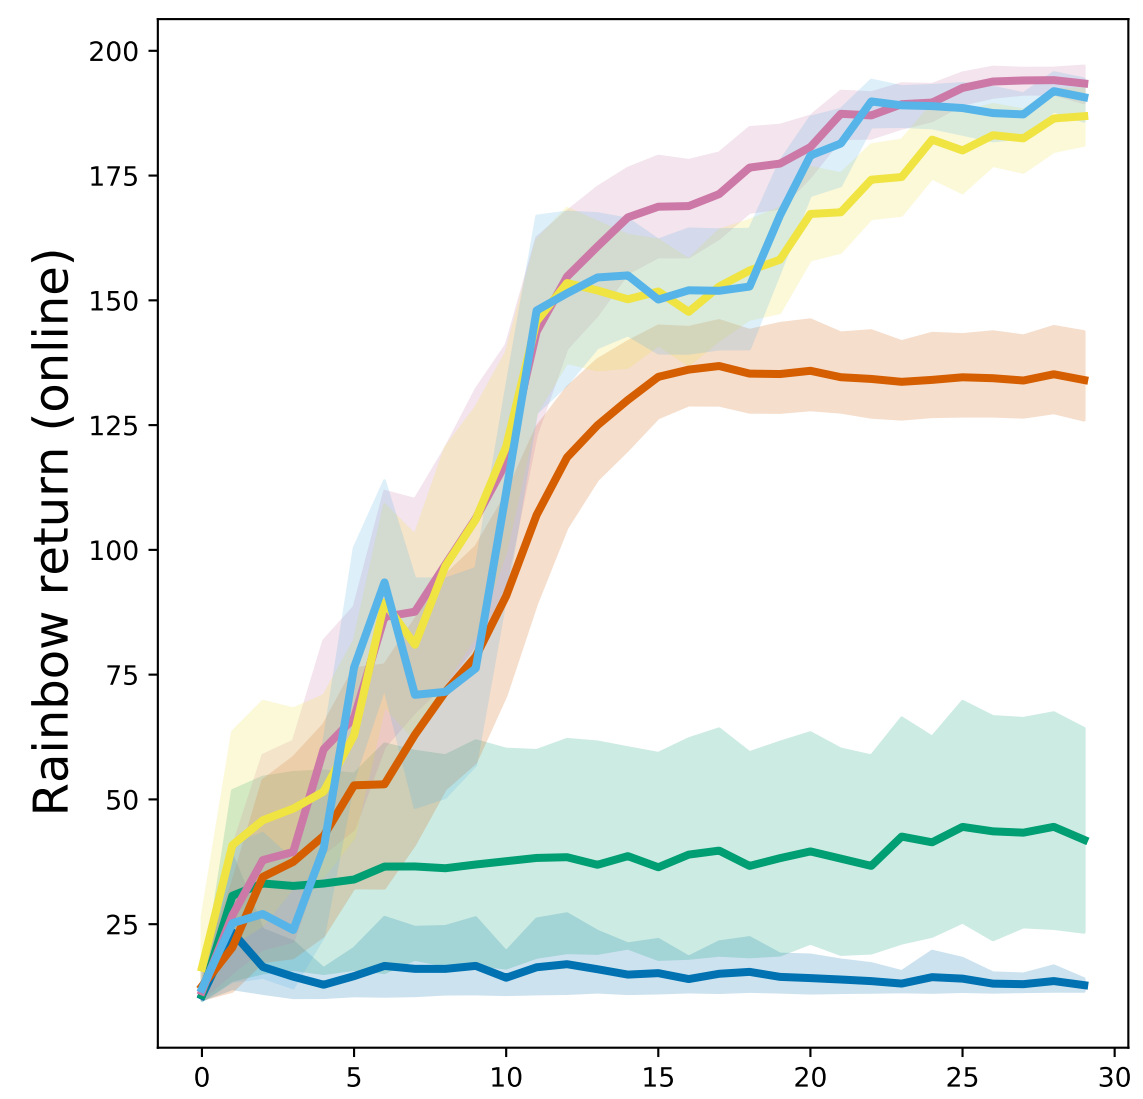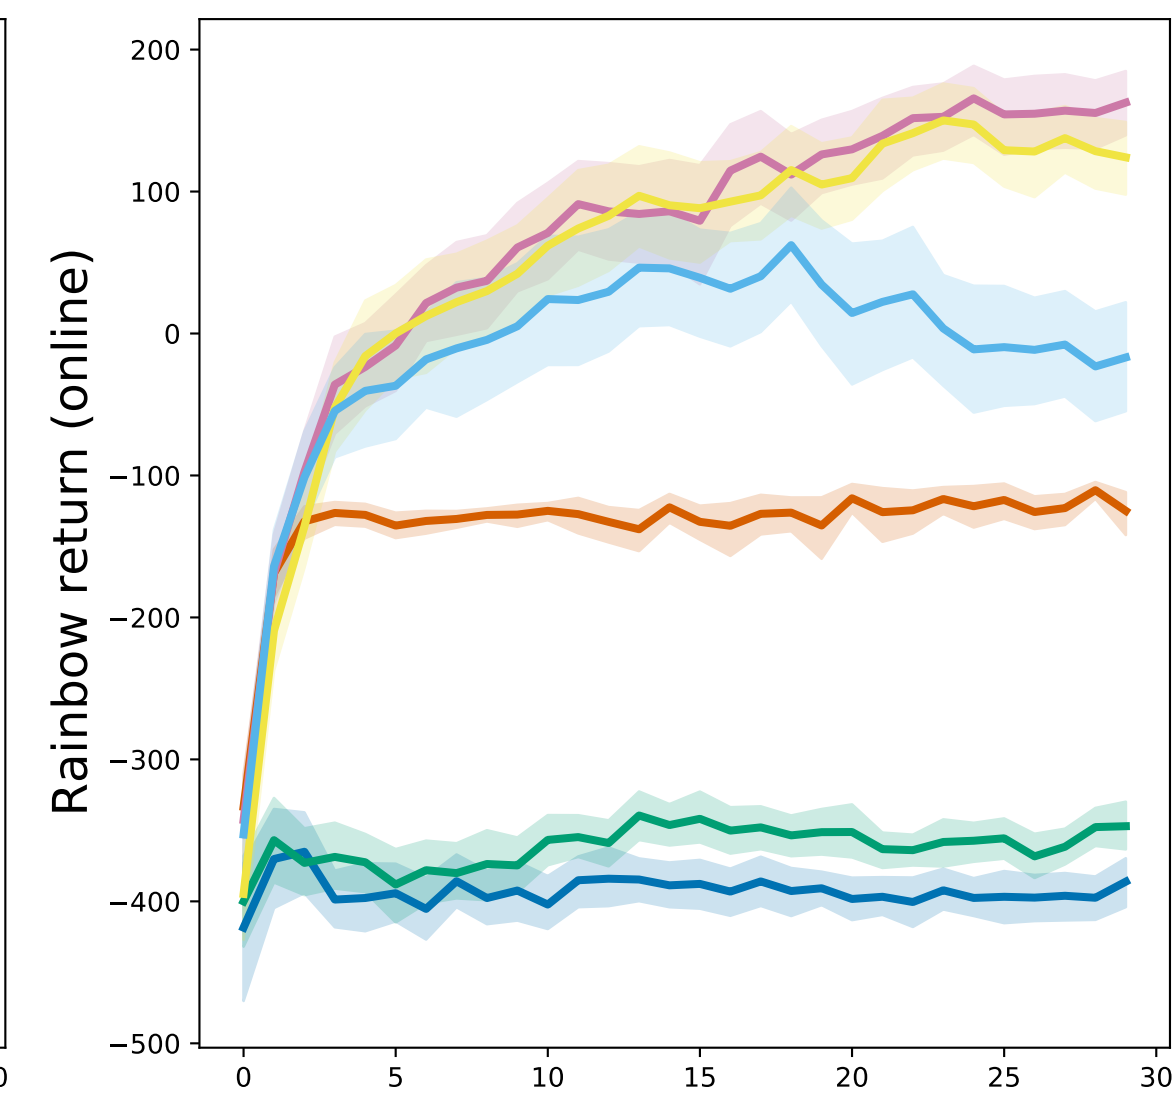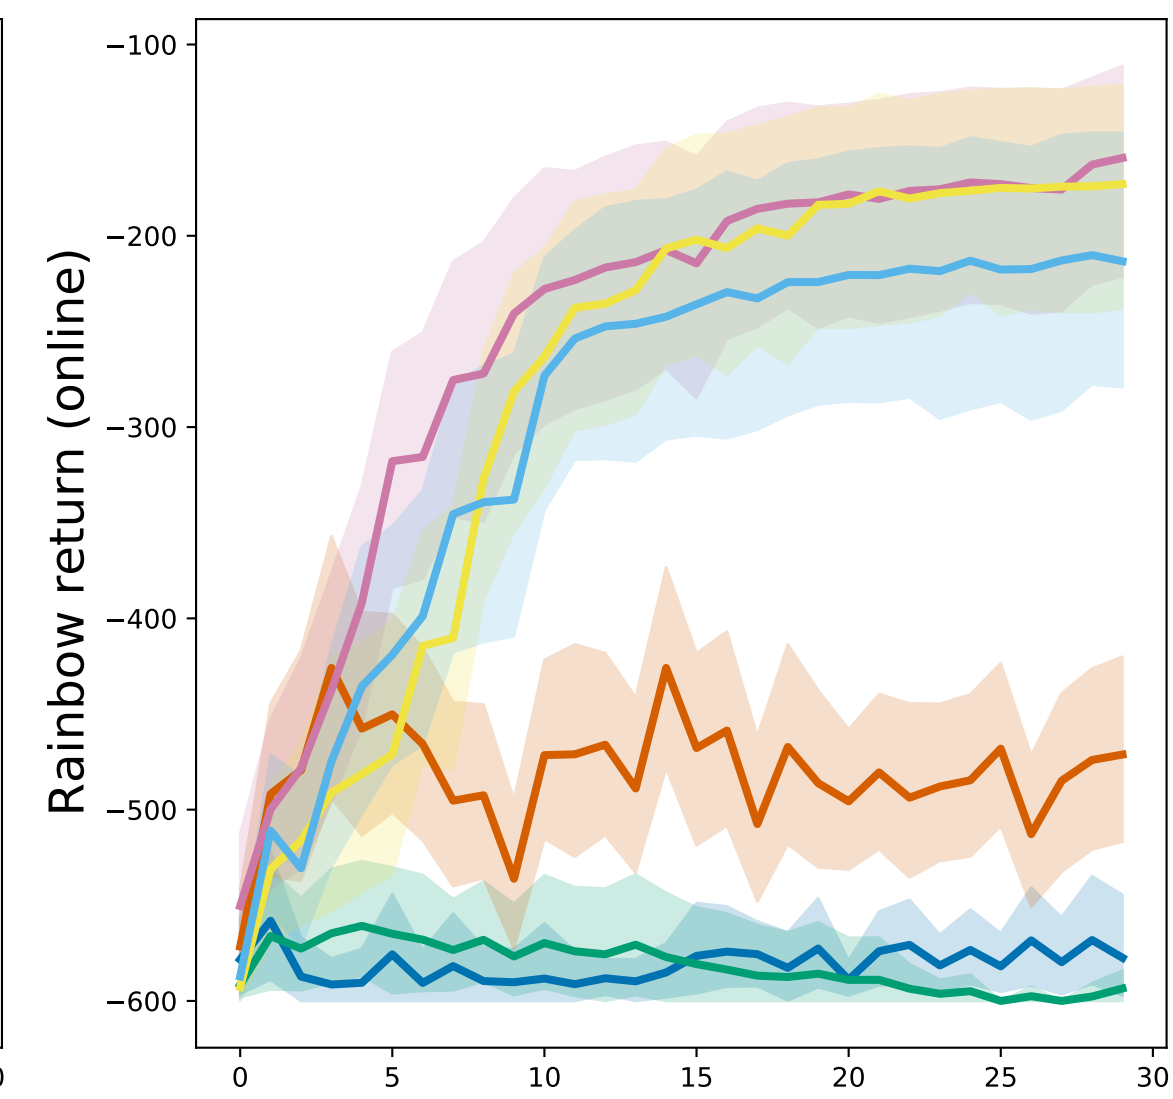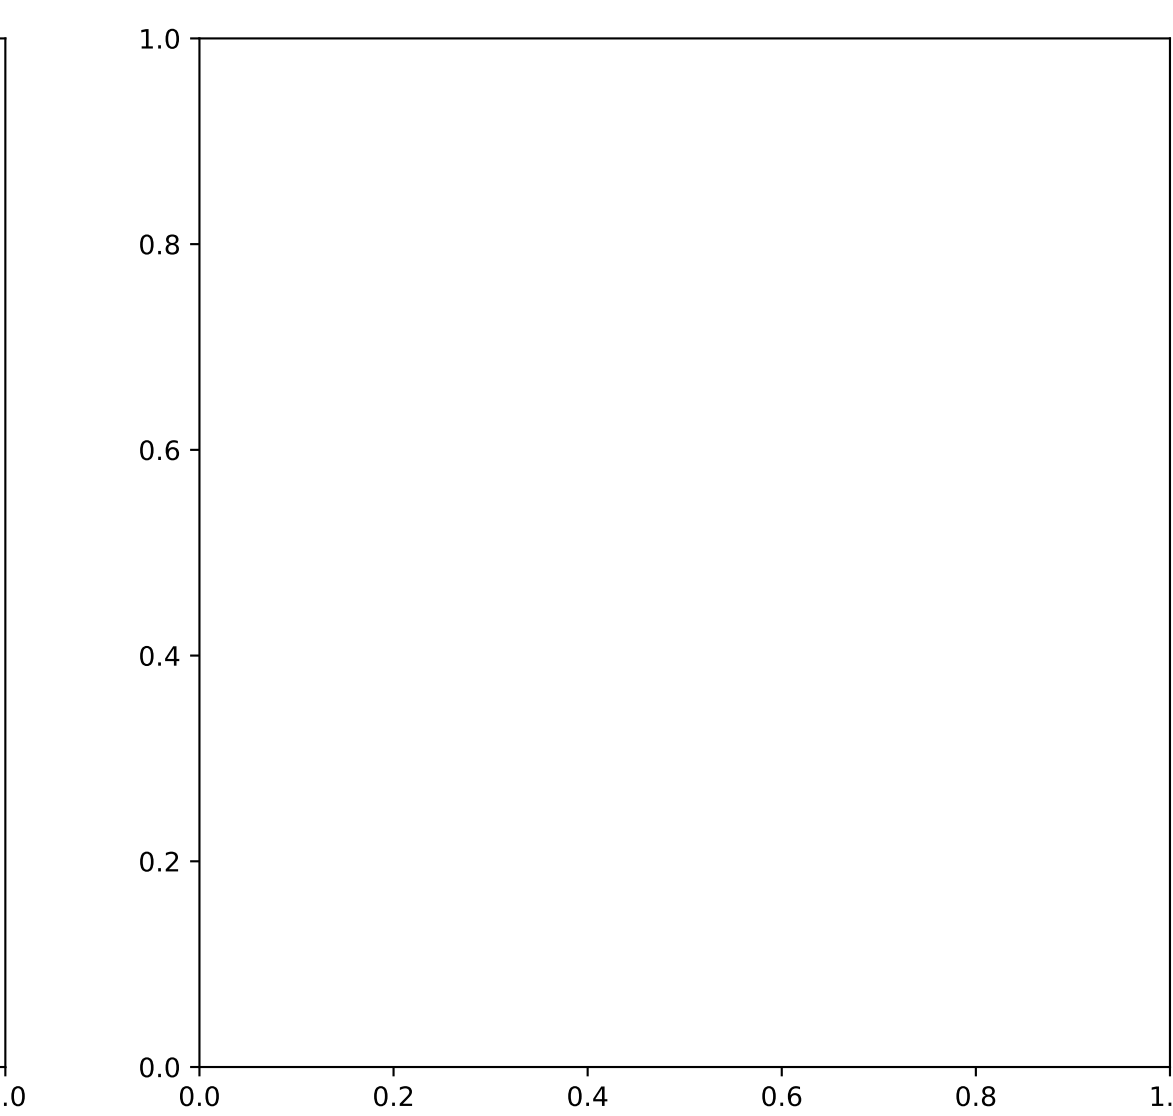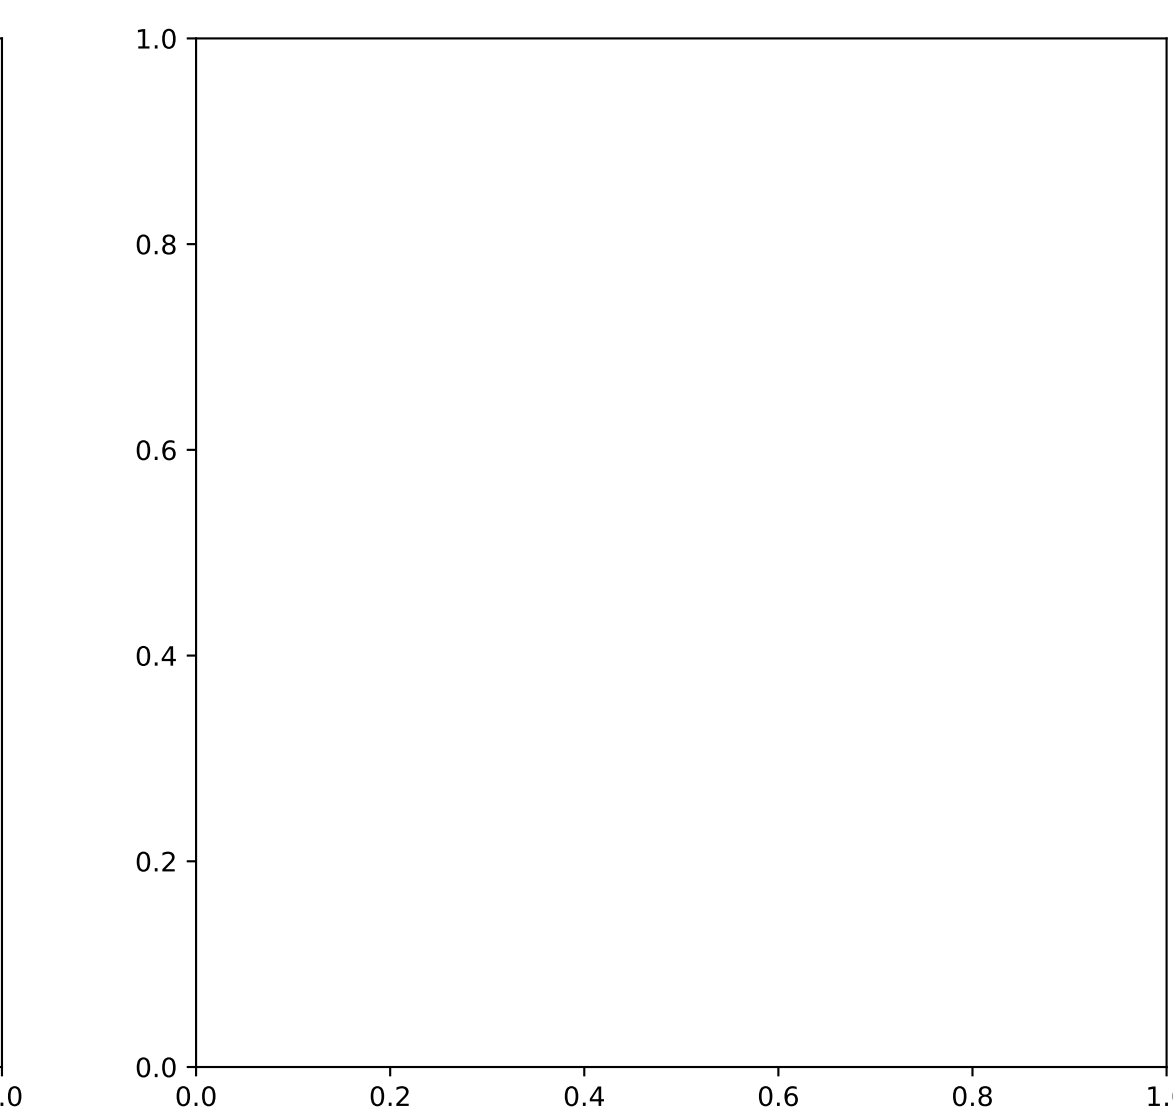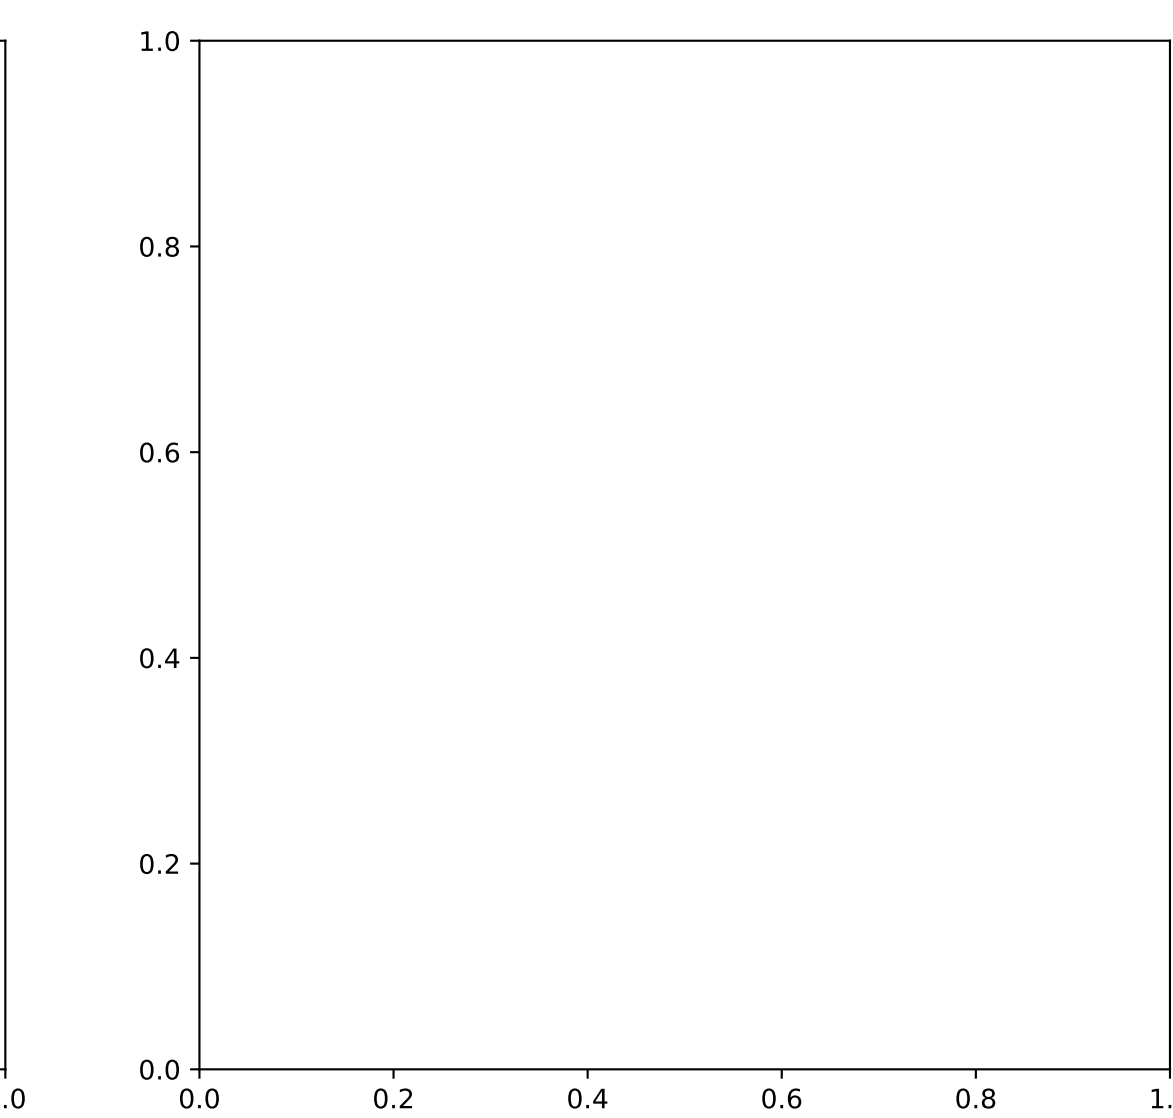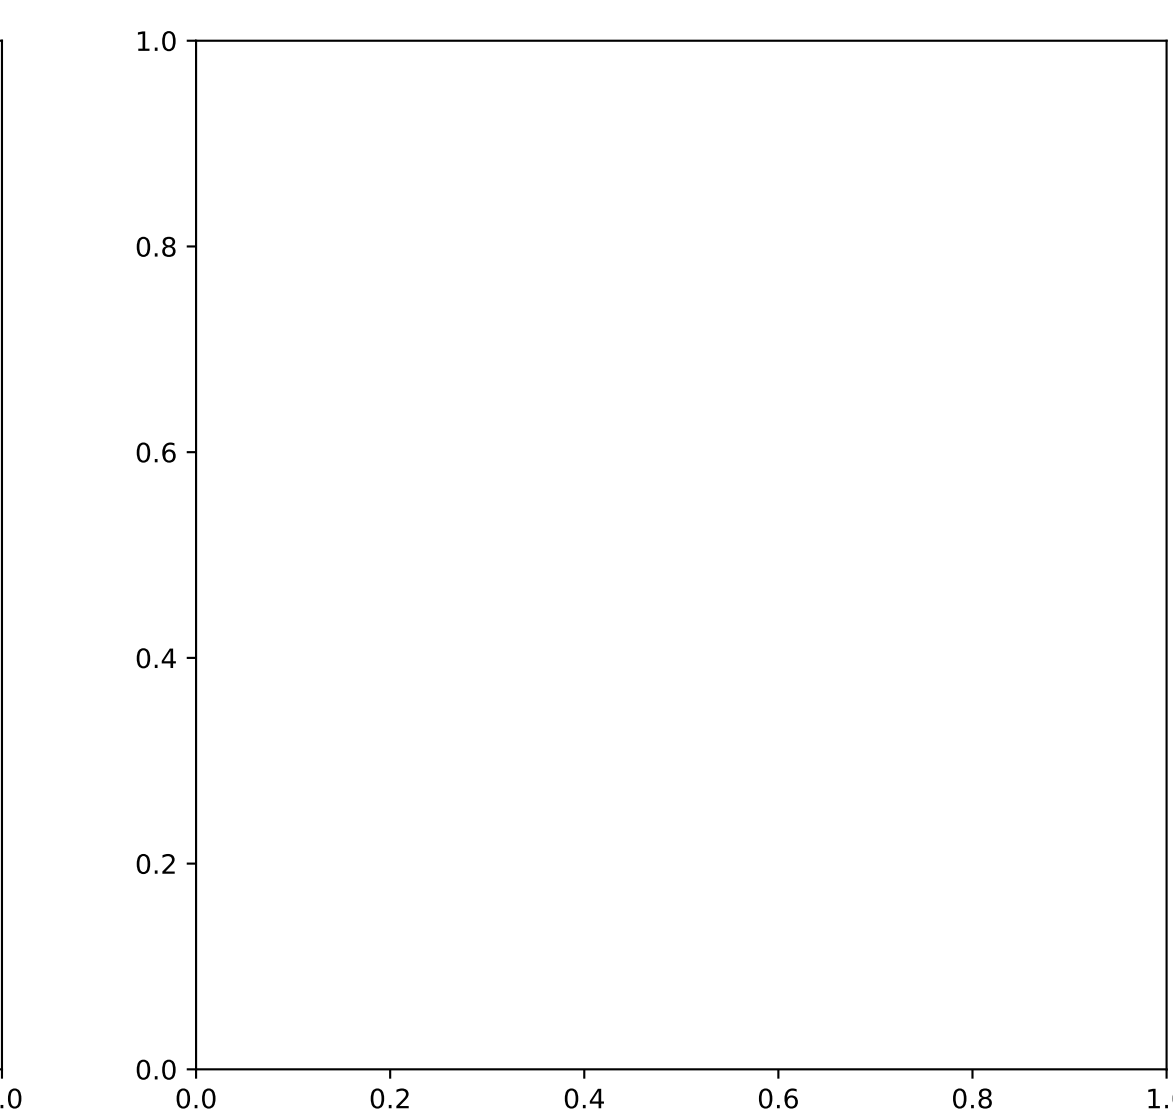

Supplement: supplementary_material [file attachment]

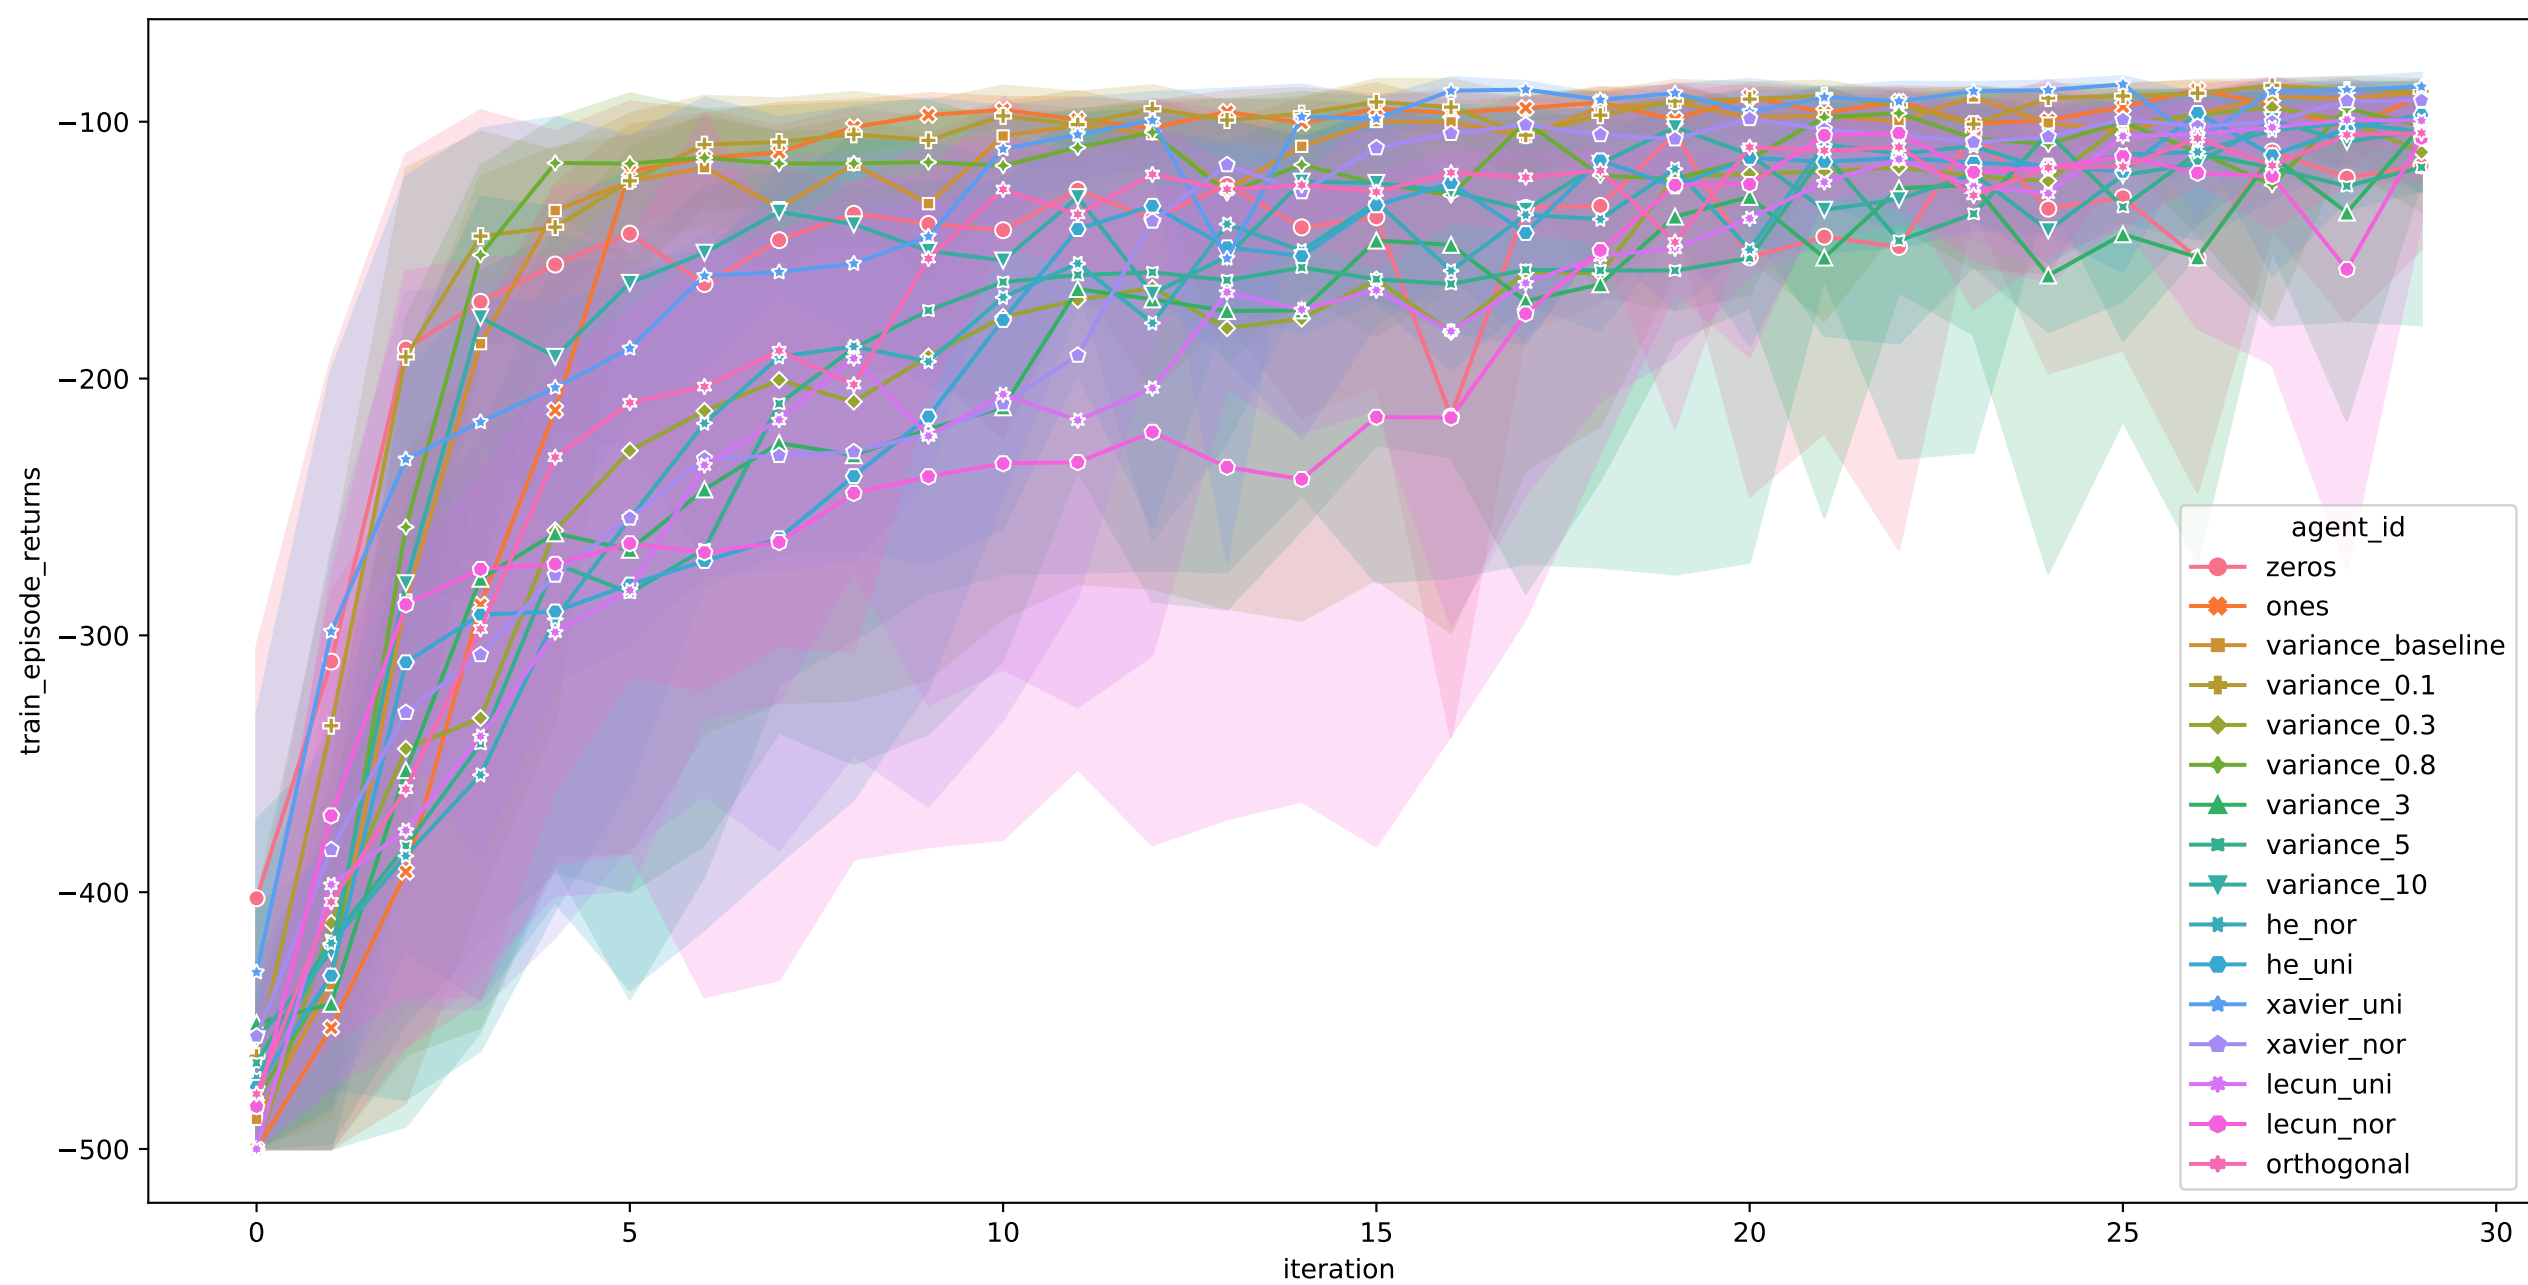

Supplement: supplementary_material [file attachment]

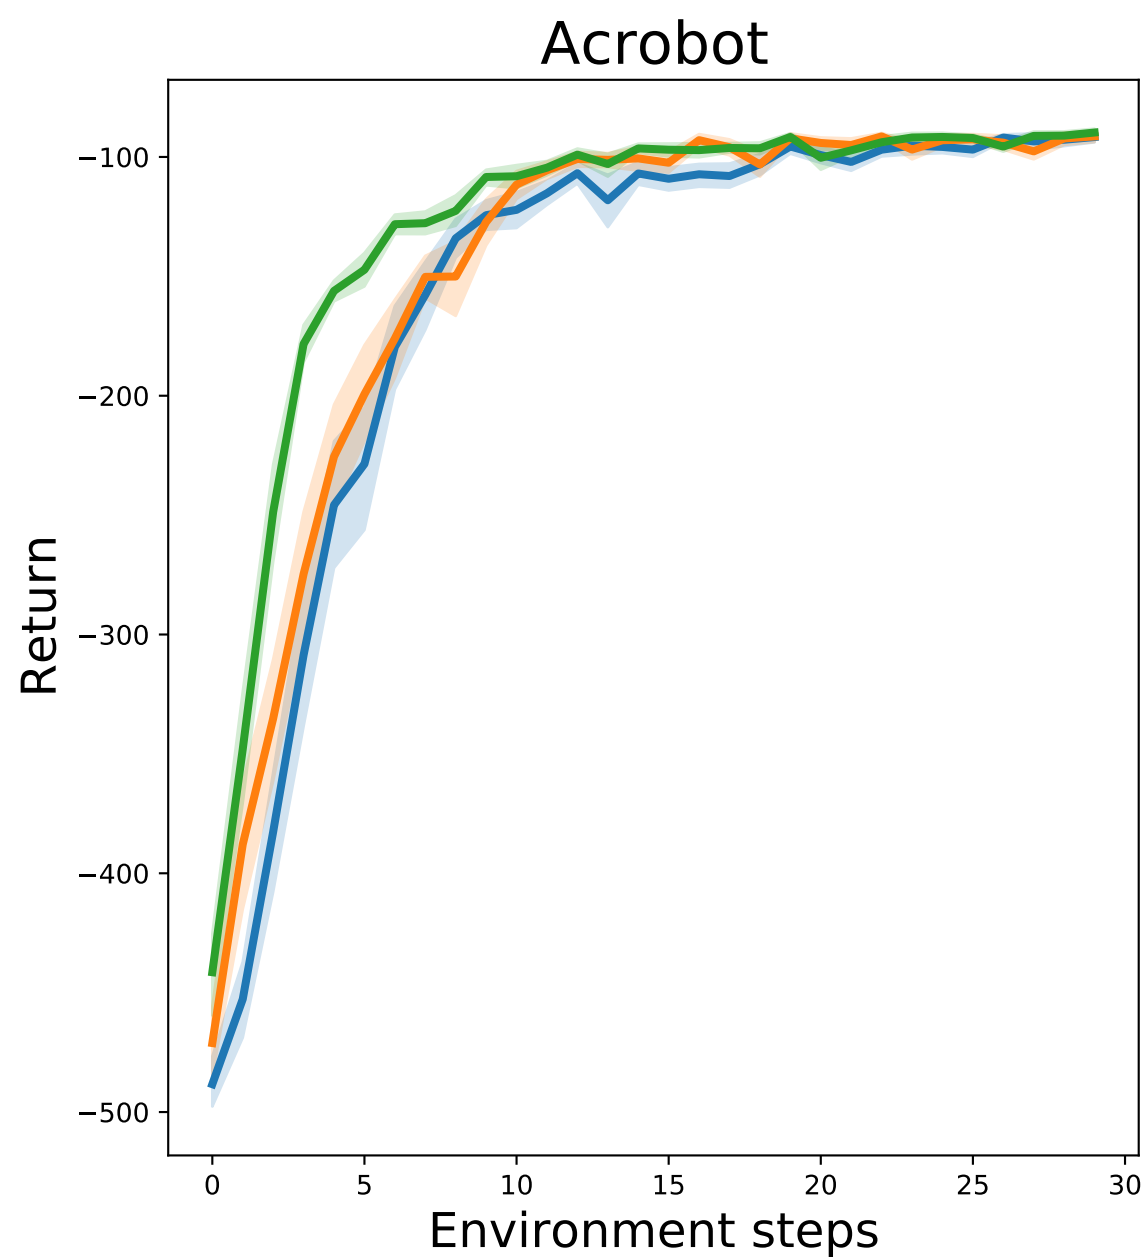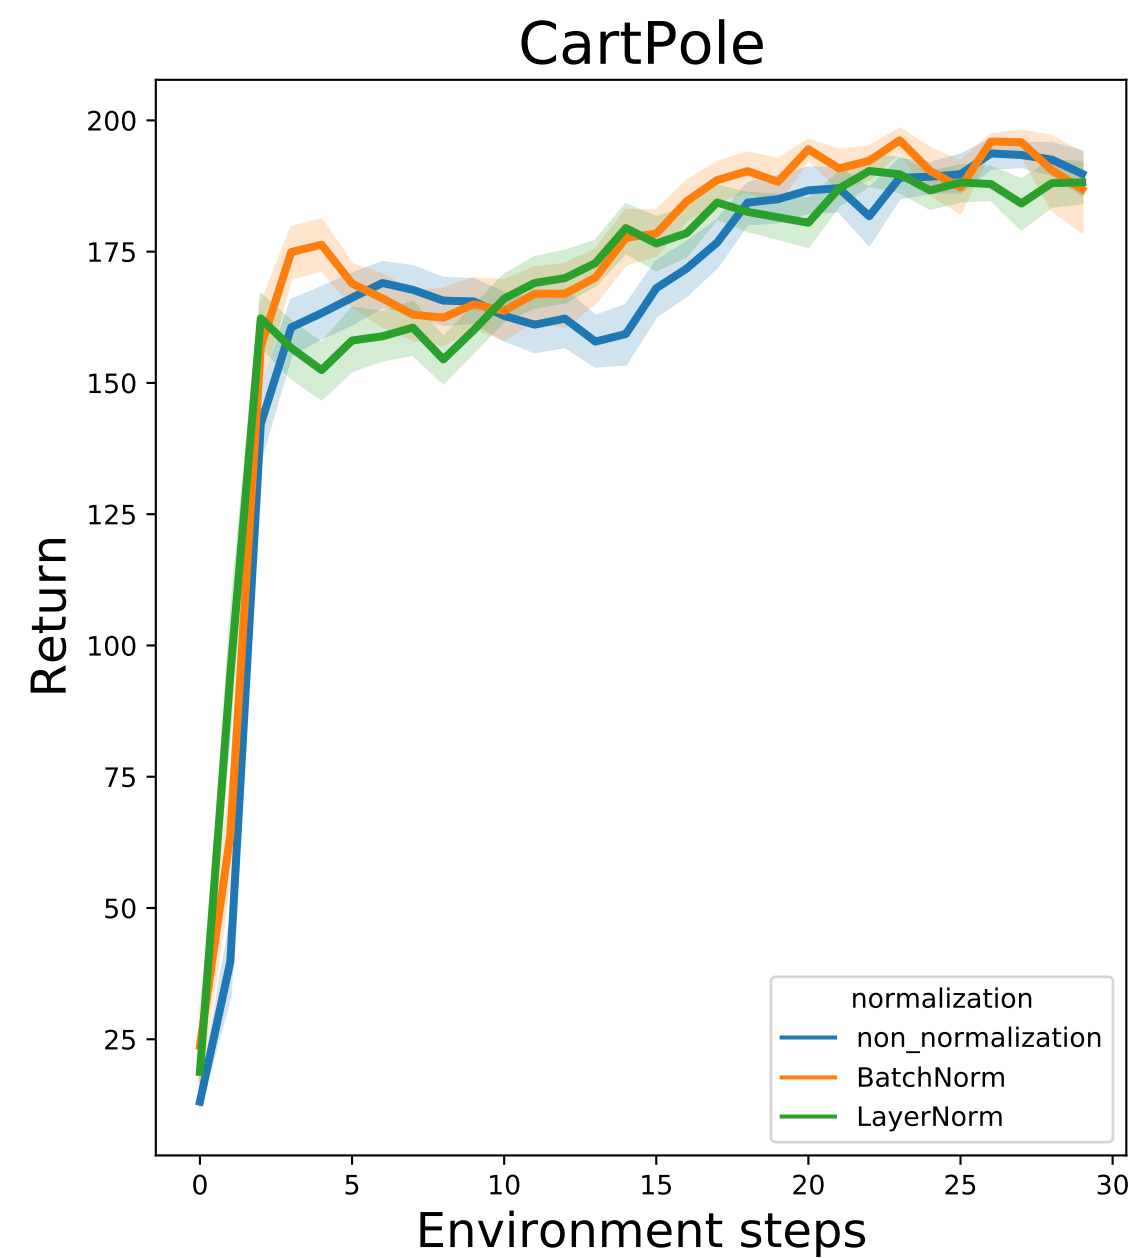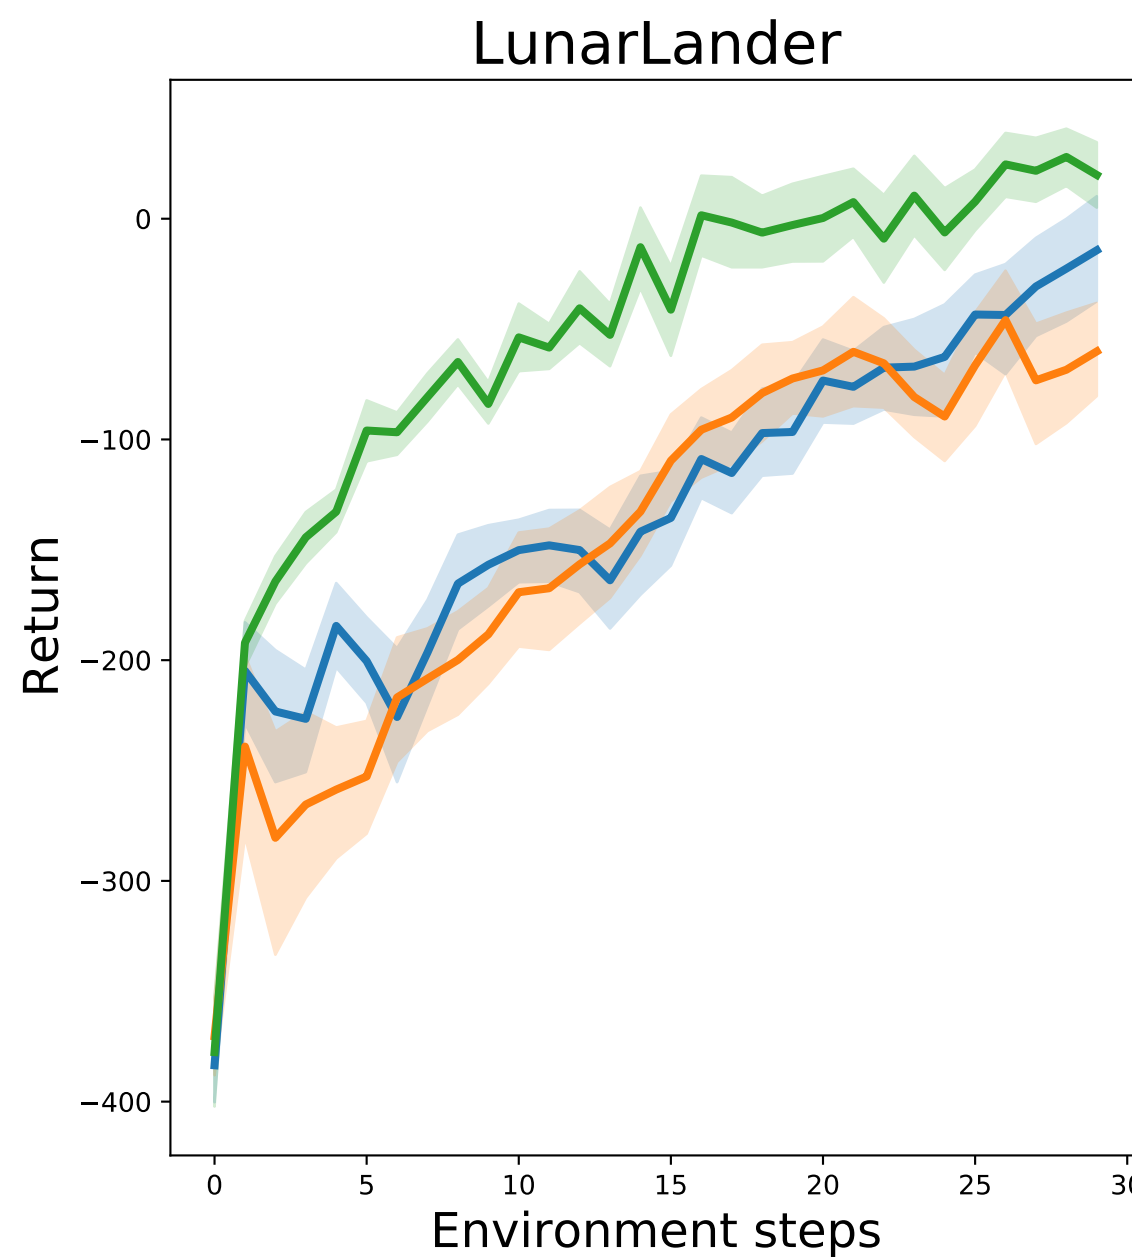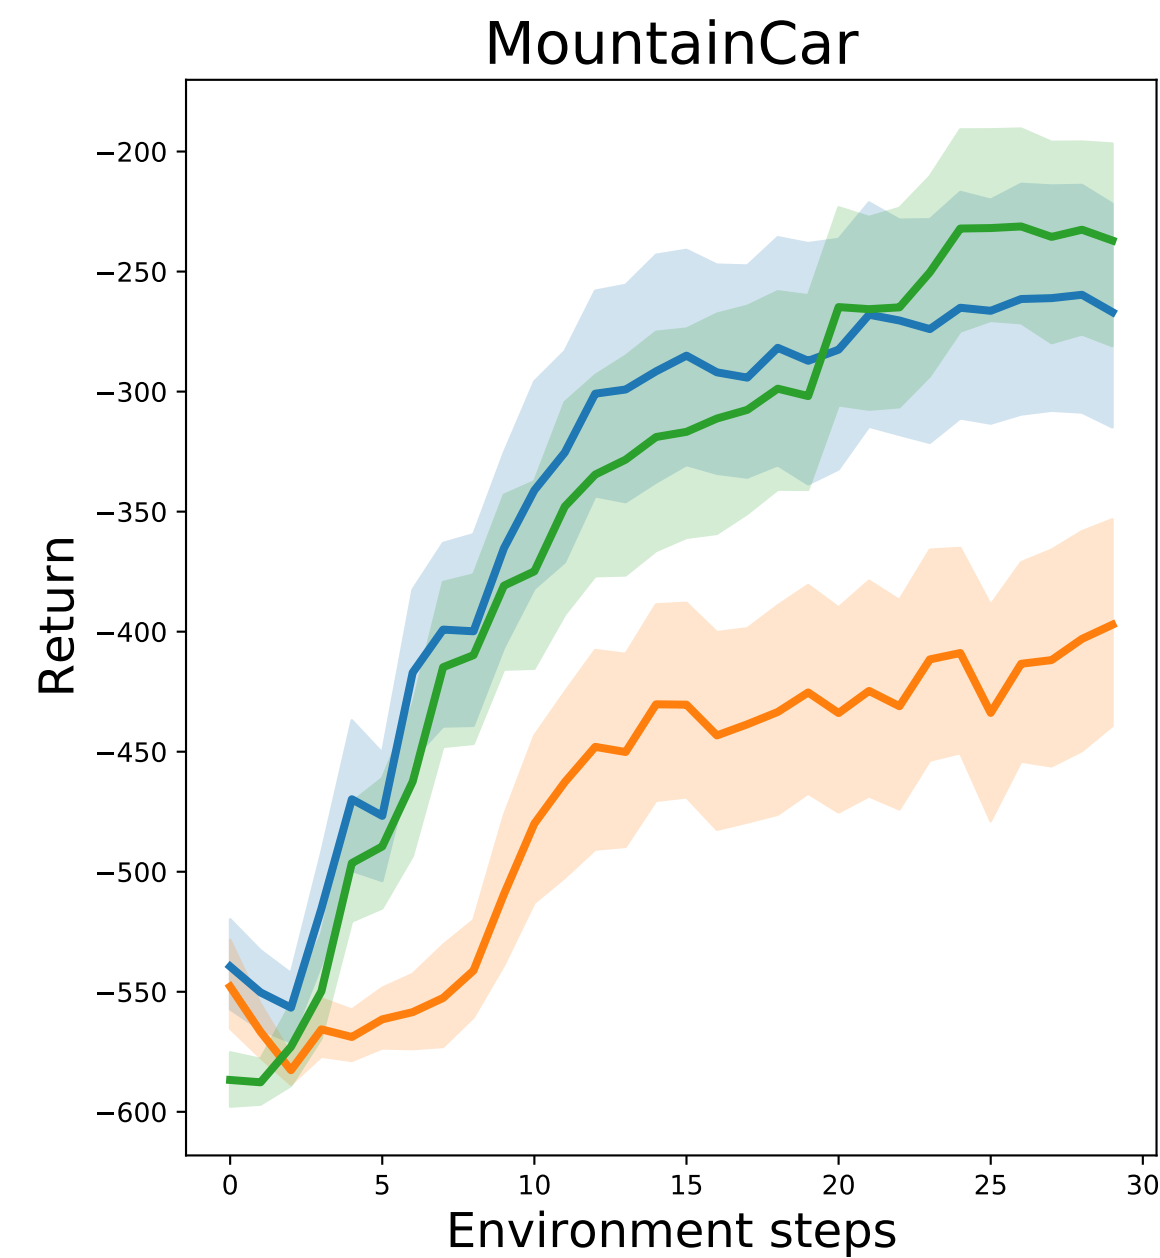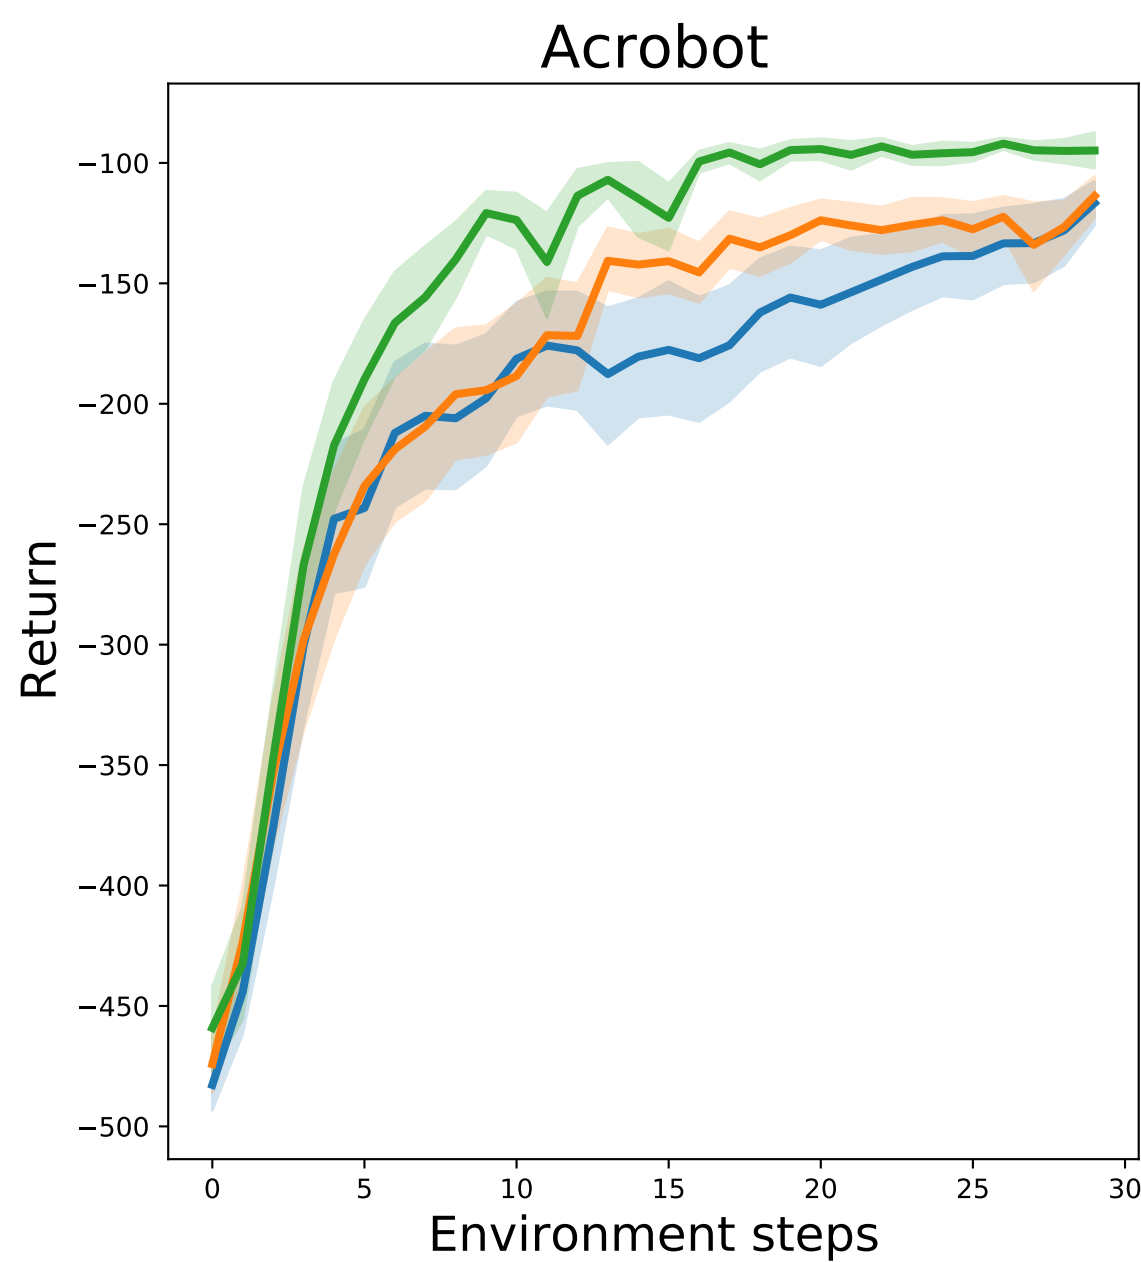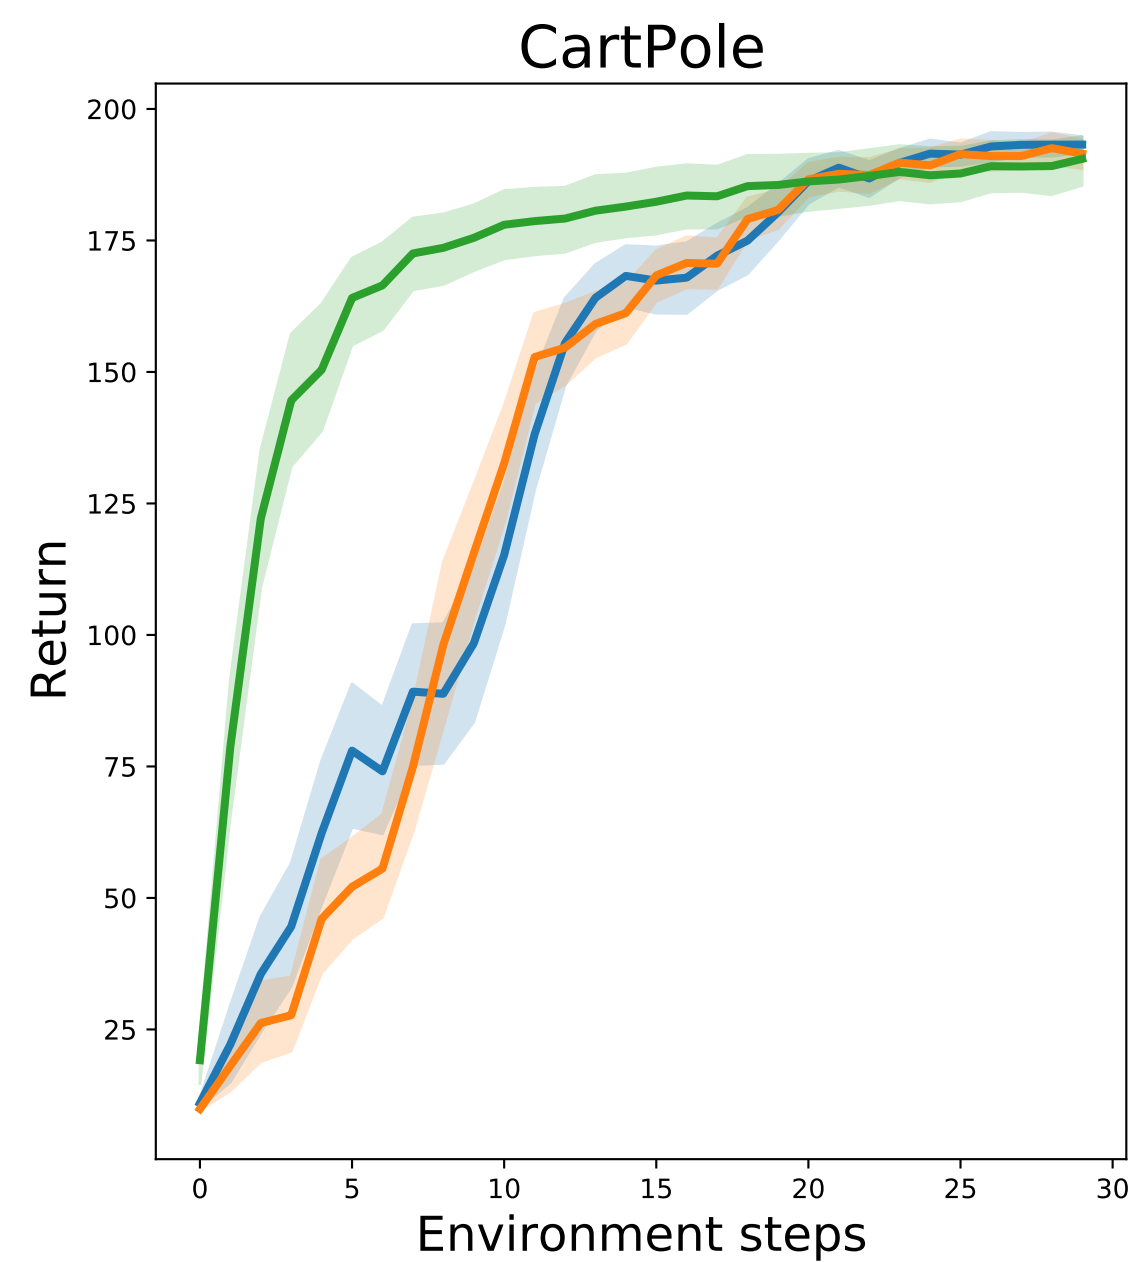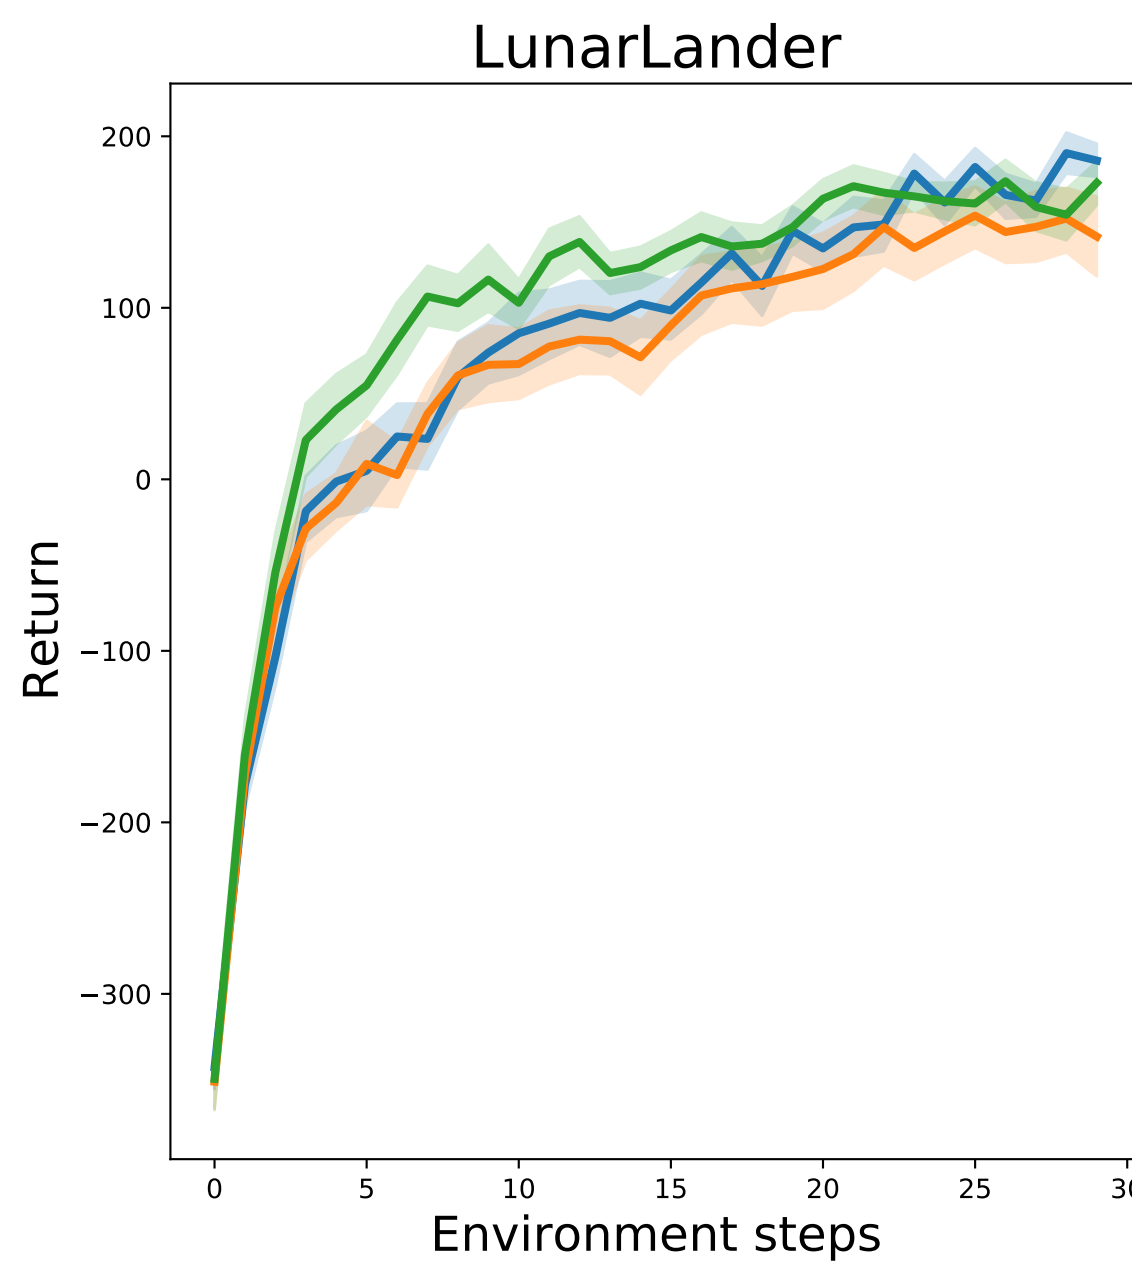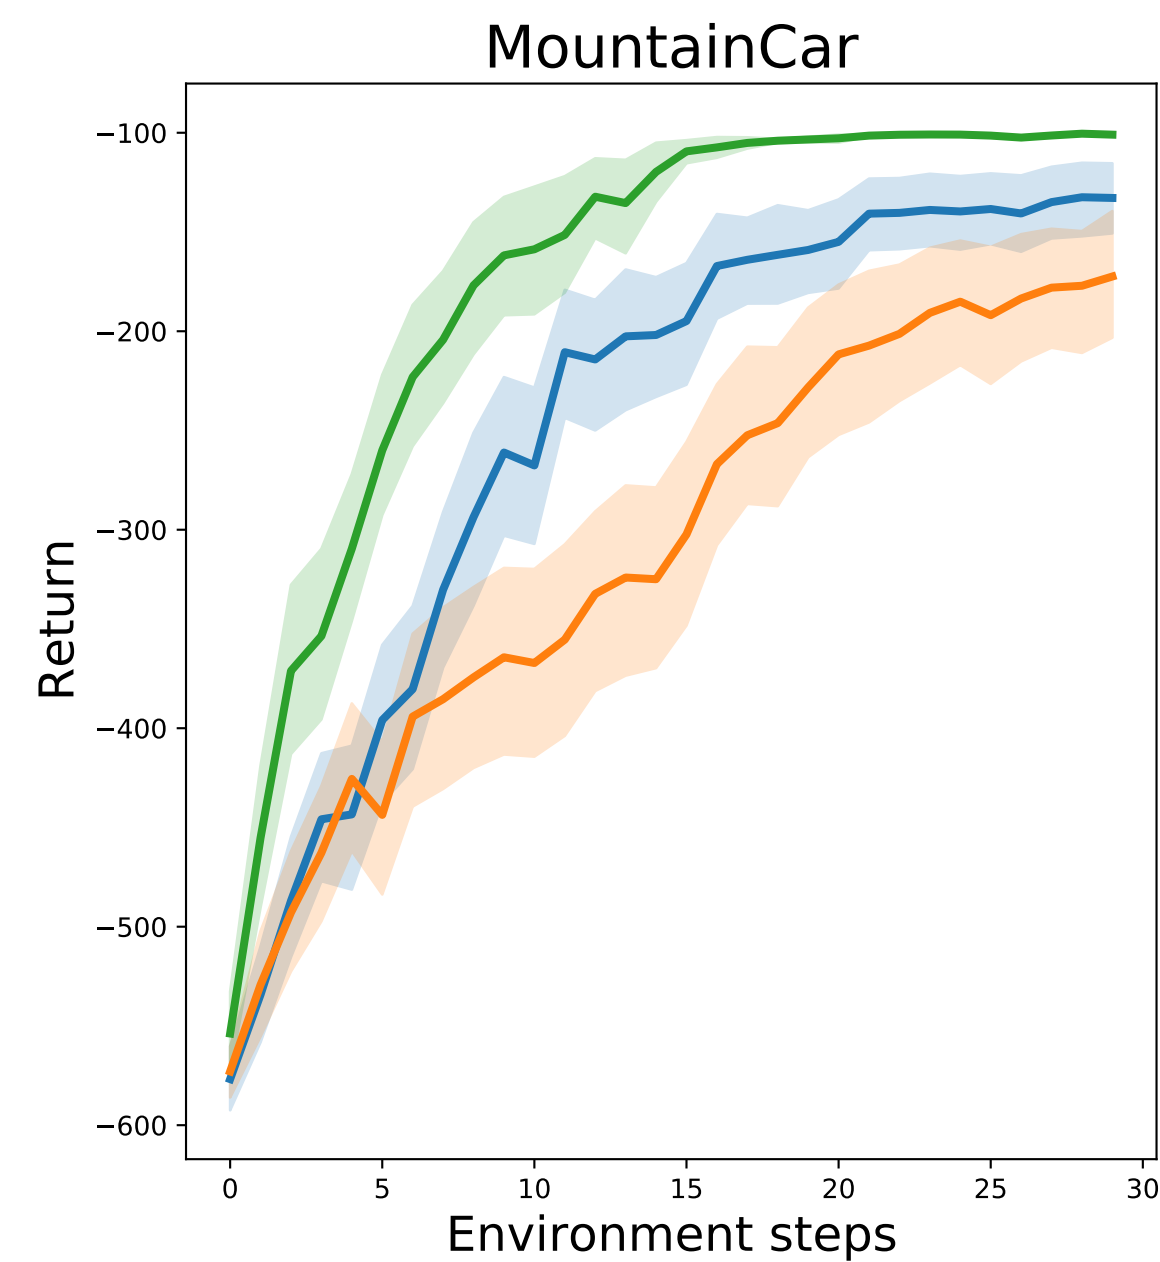

Supplement: supplementary_material [file attachment]

Acrobot

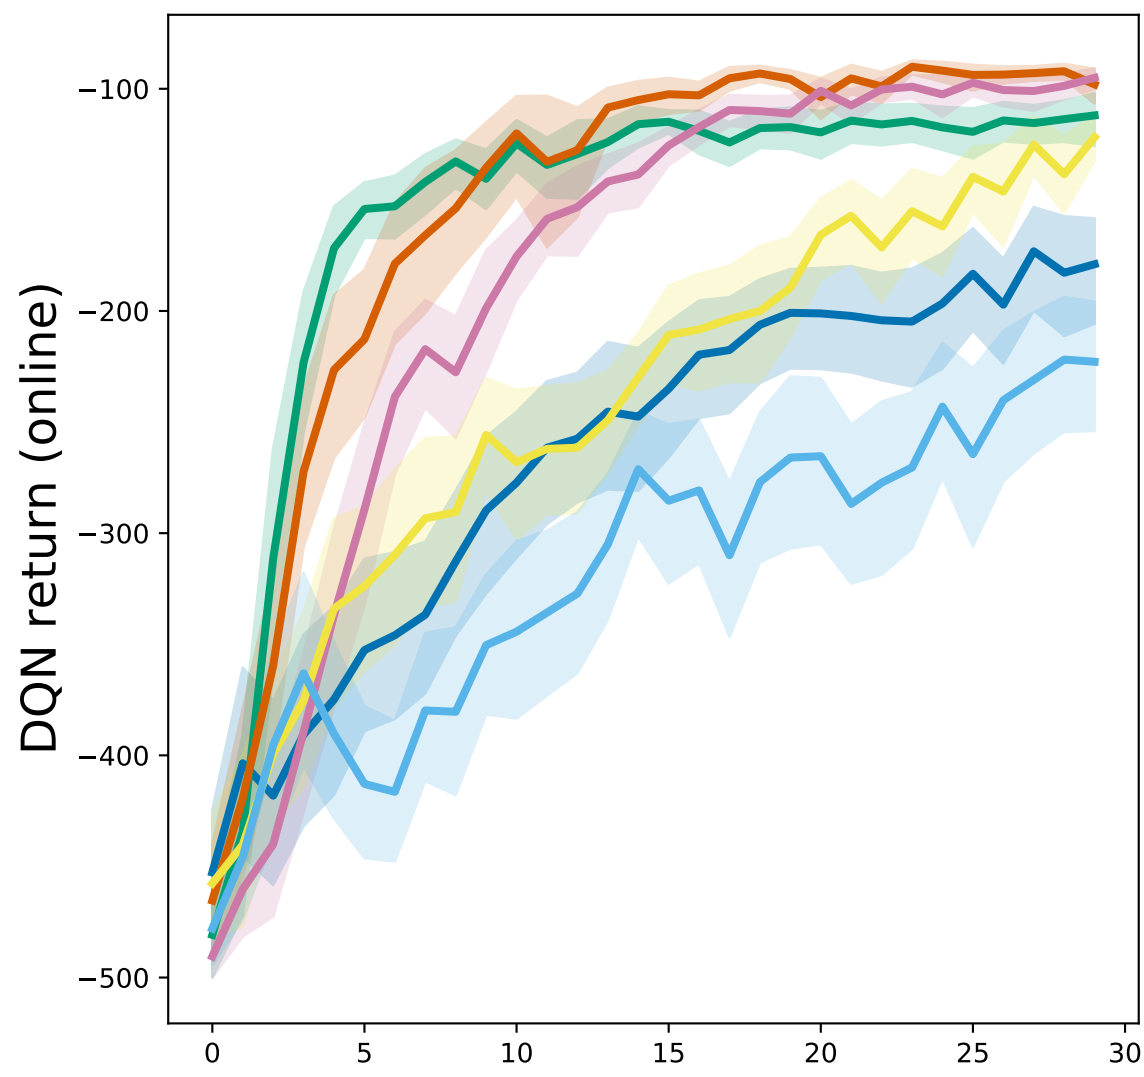

CartPole

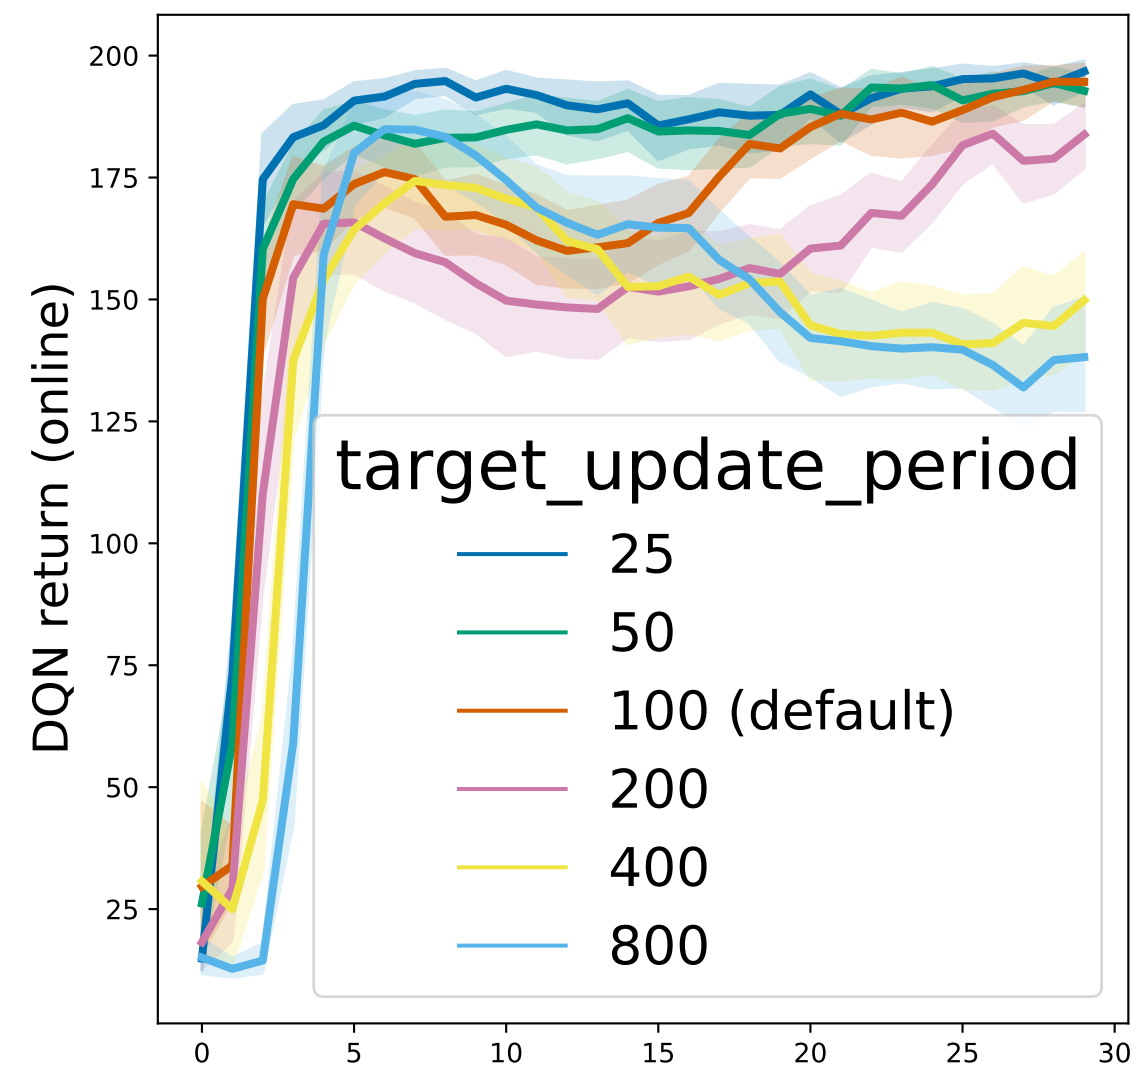

LunarLander

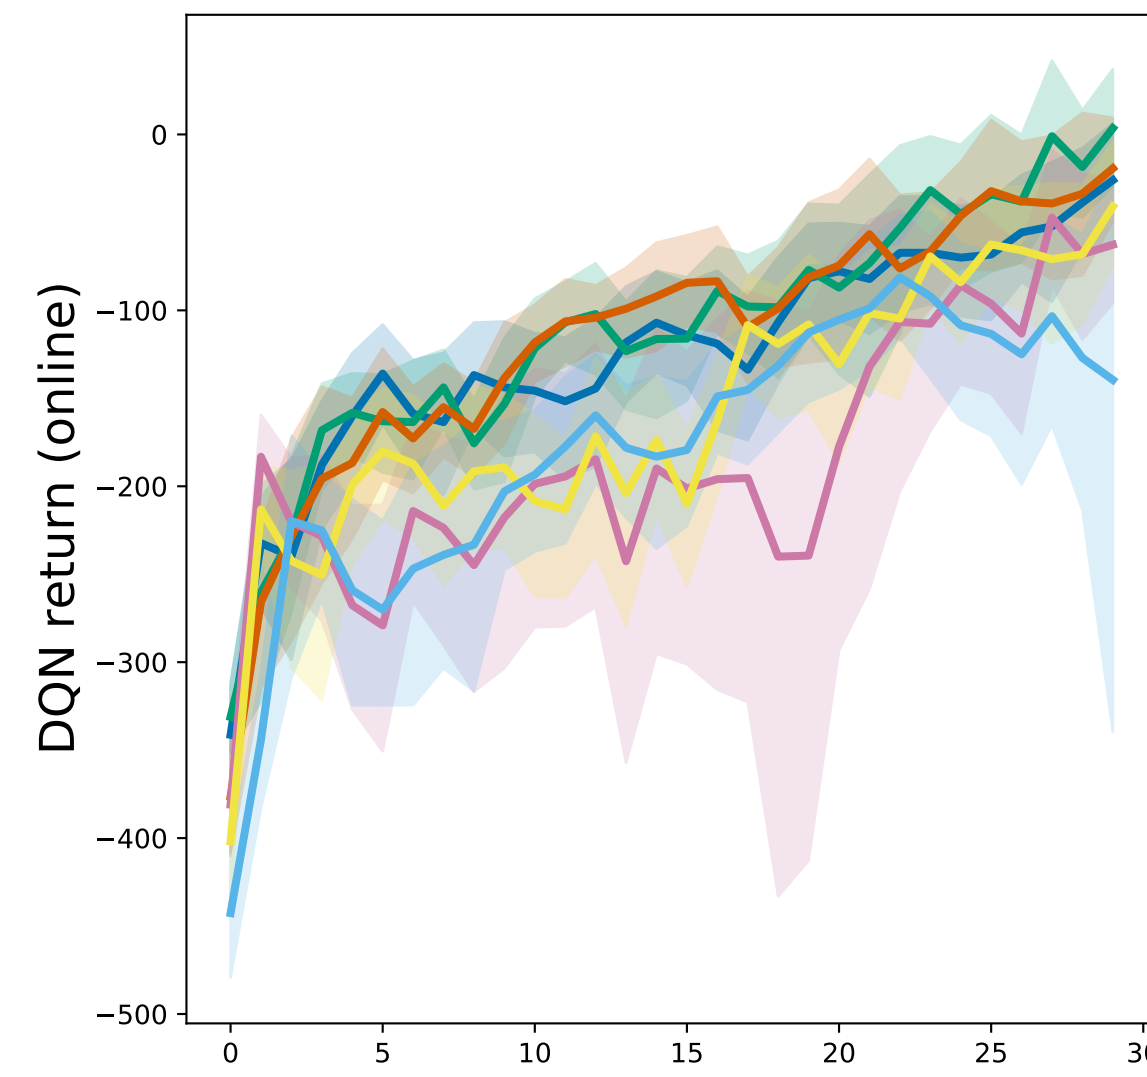

MountainCar

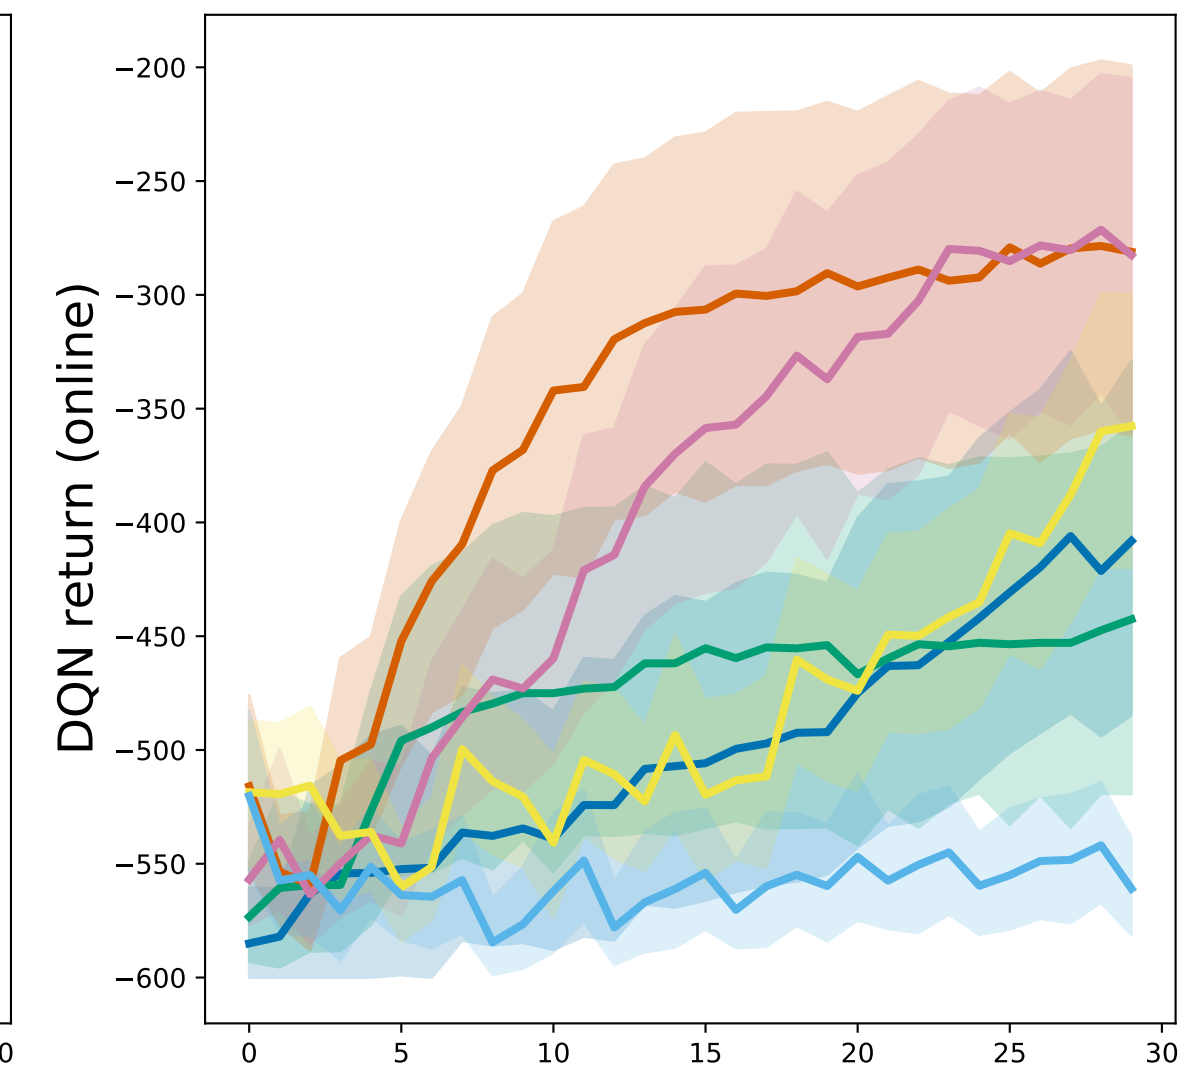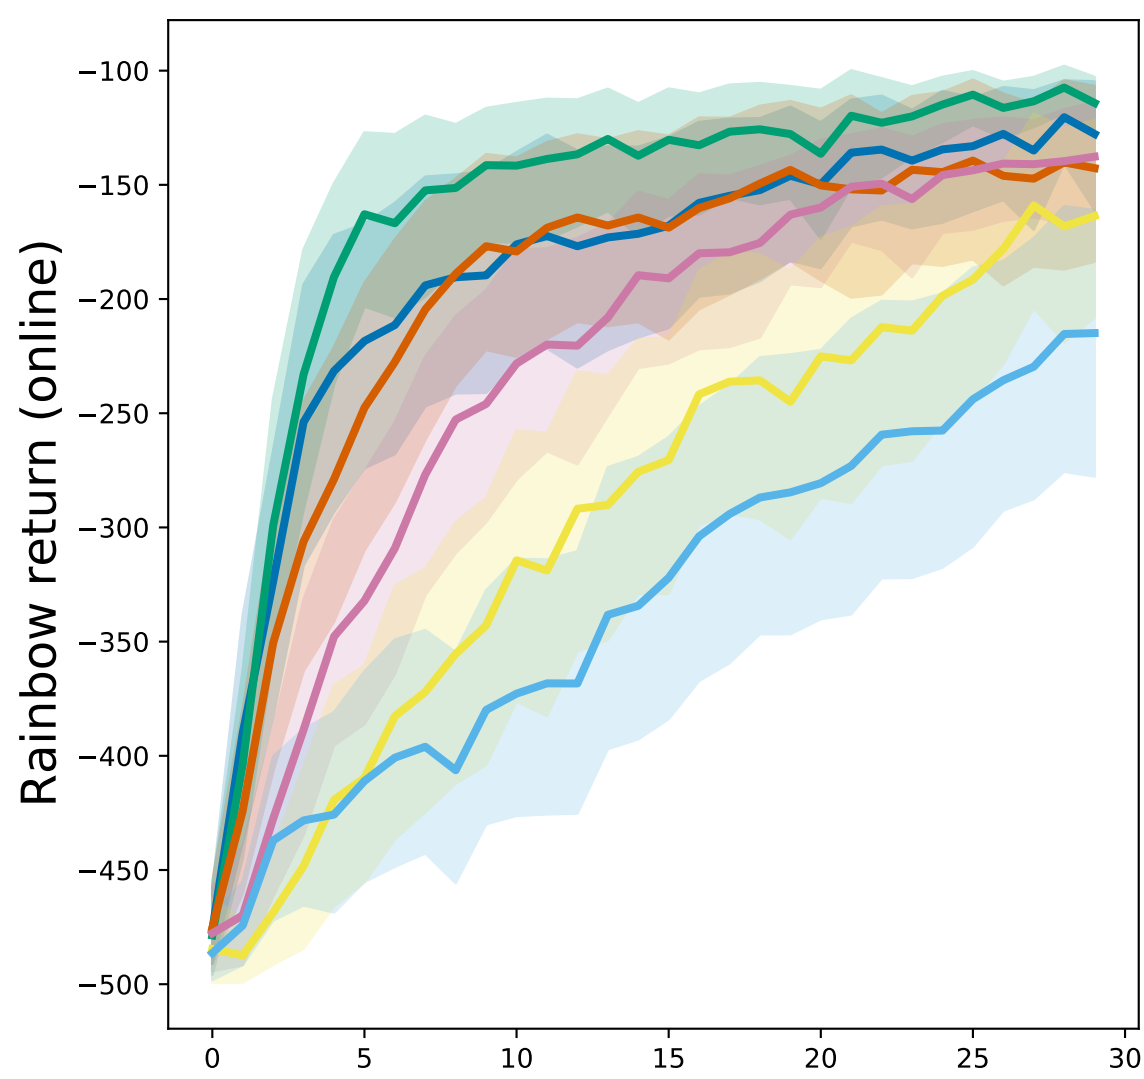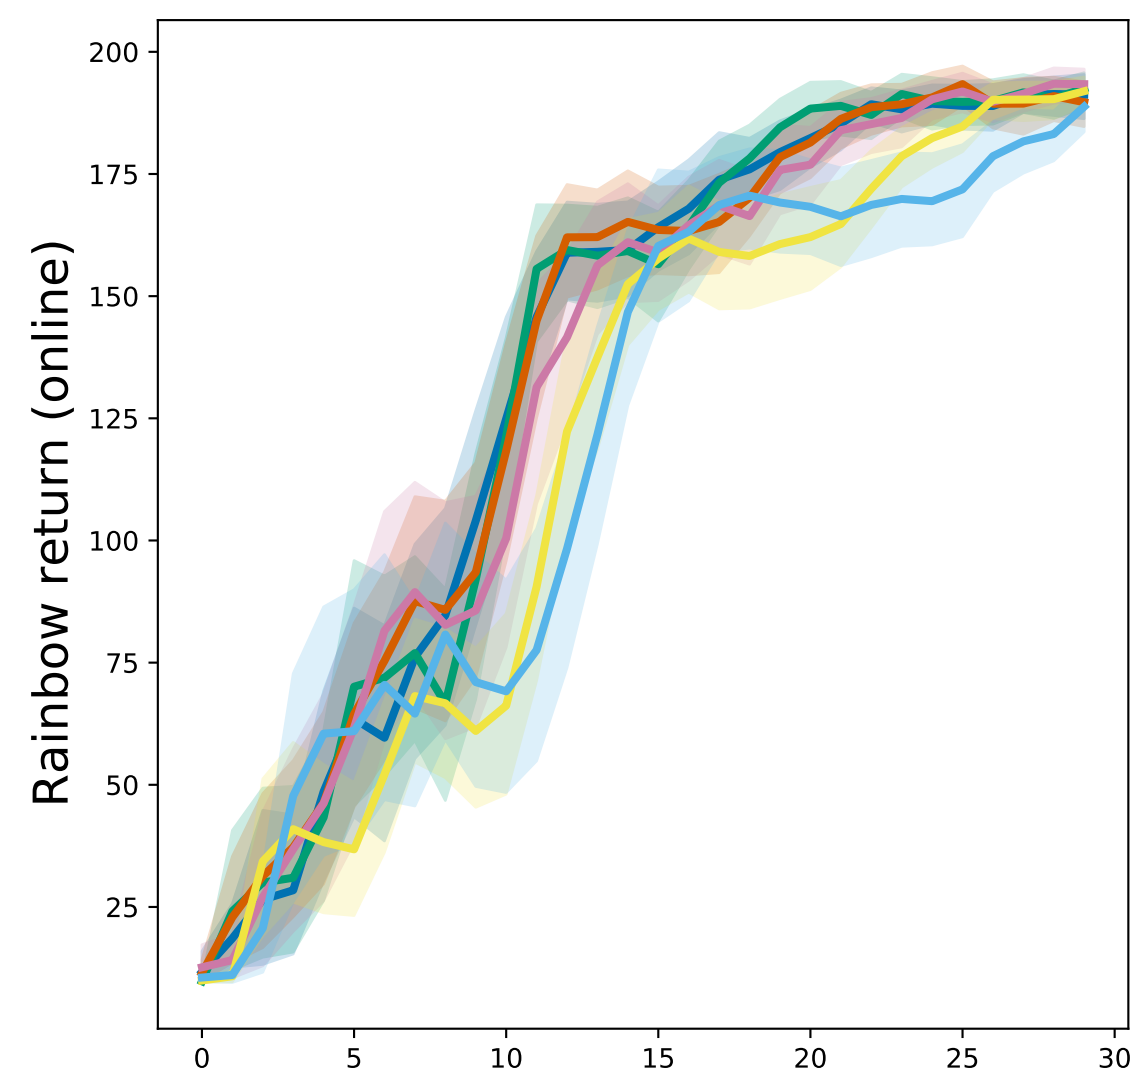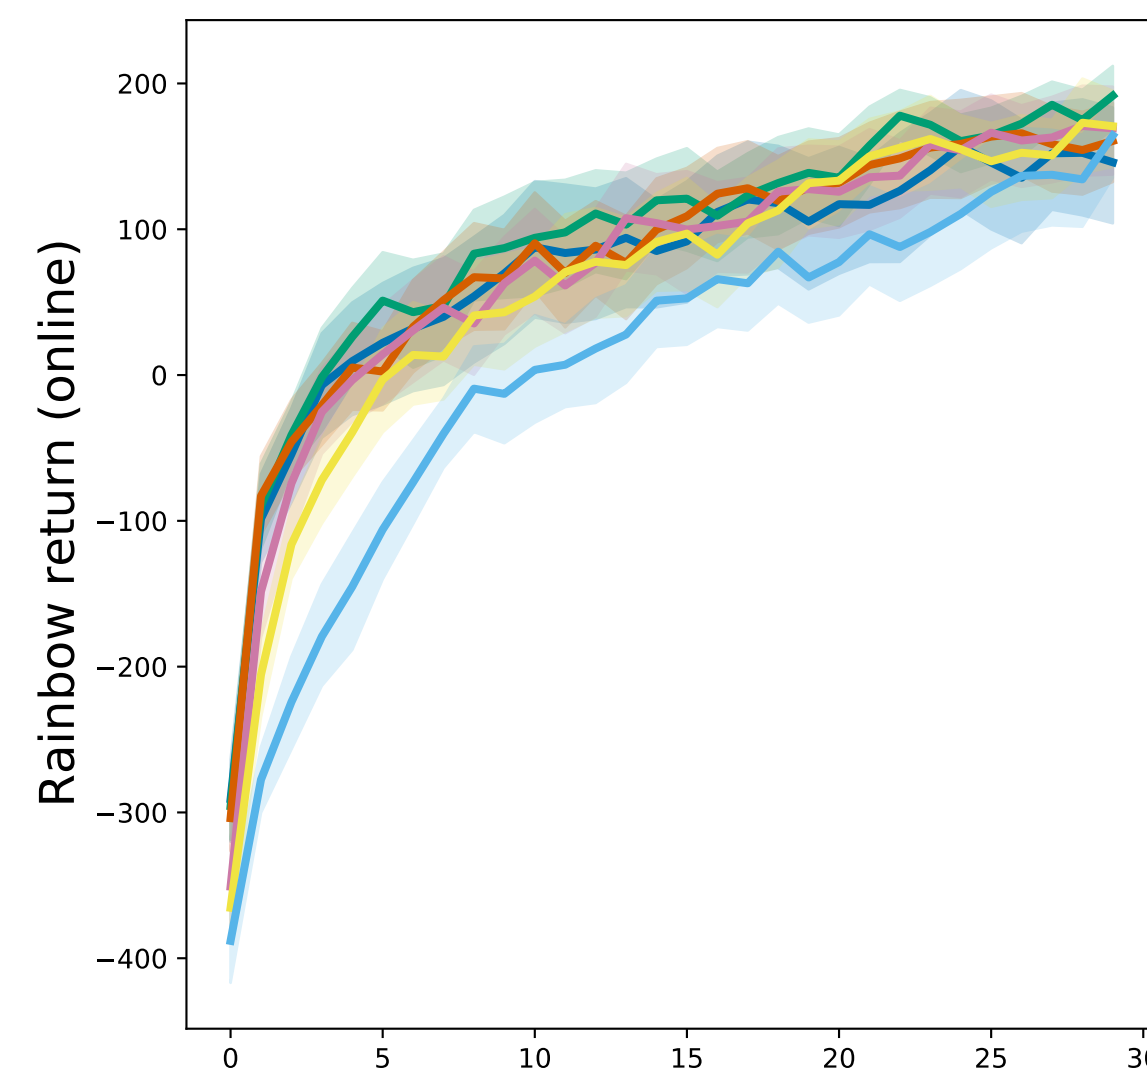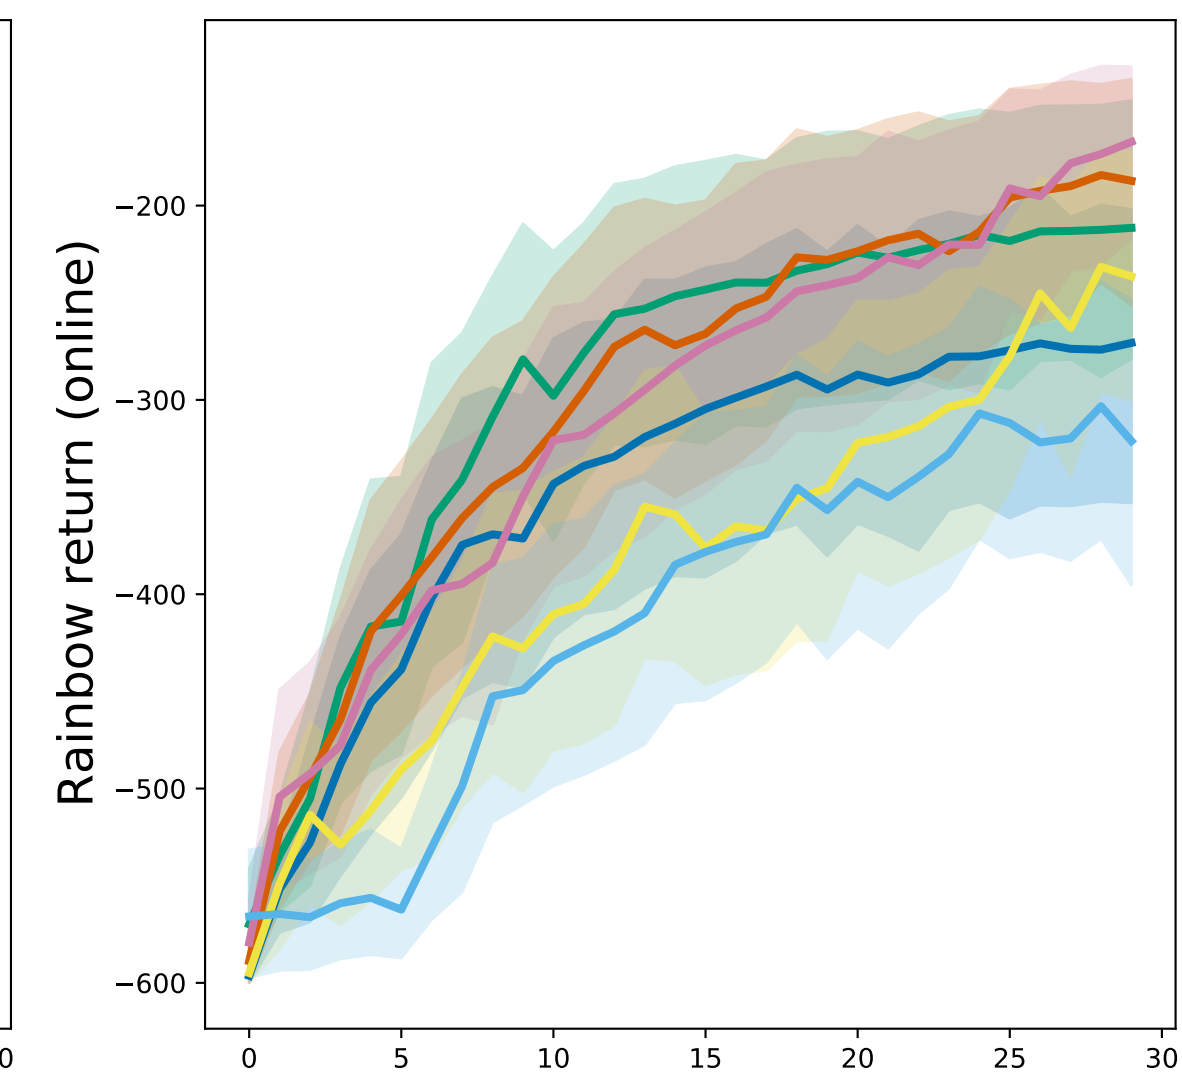

Supplement: supplementary_material [file attachment]

Acrobot

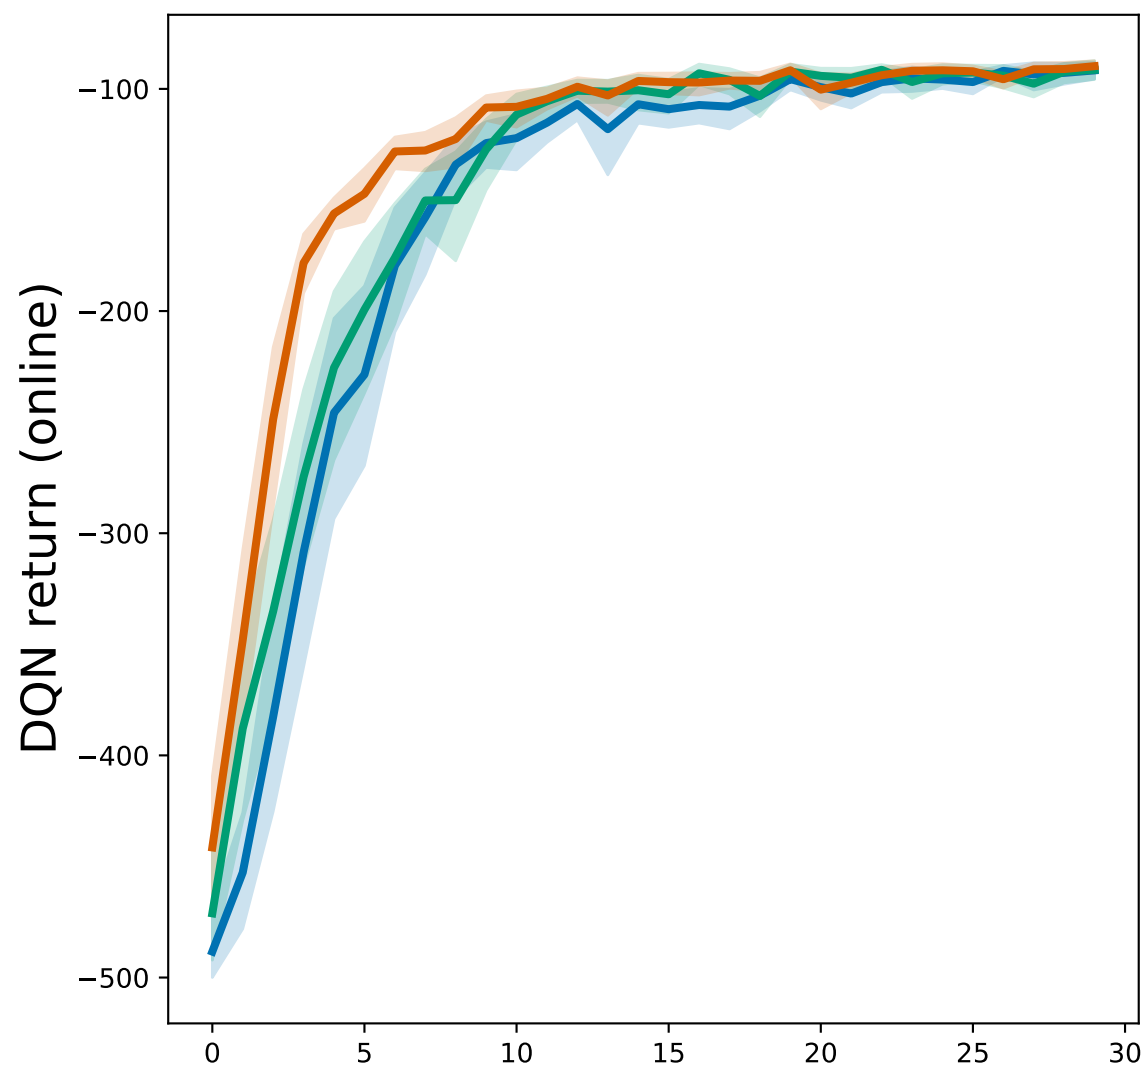

CartPole

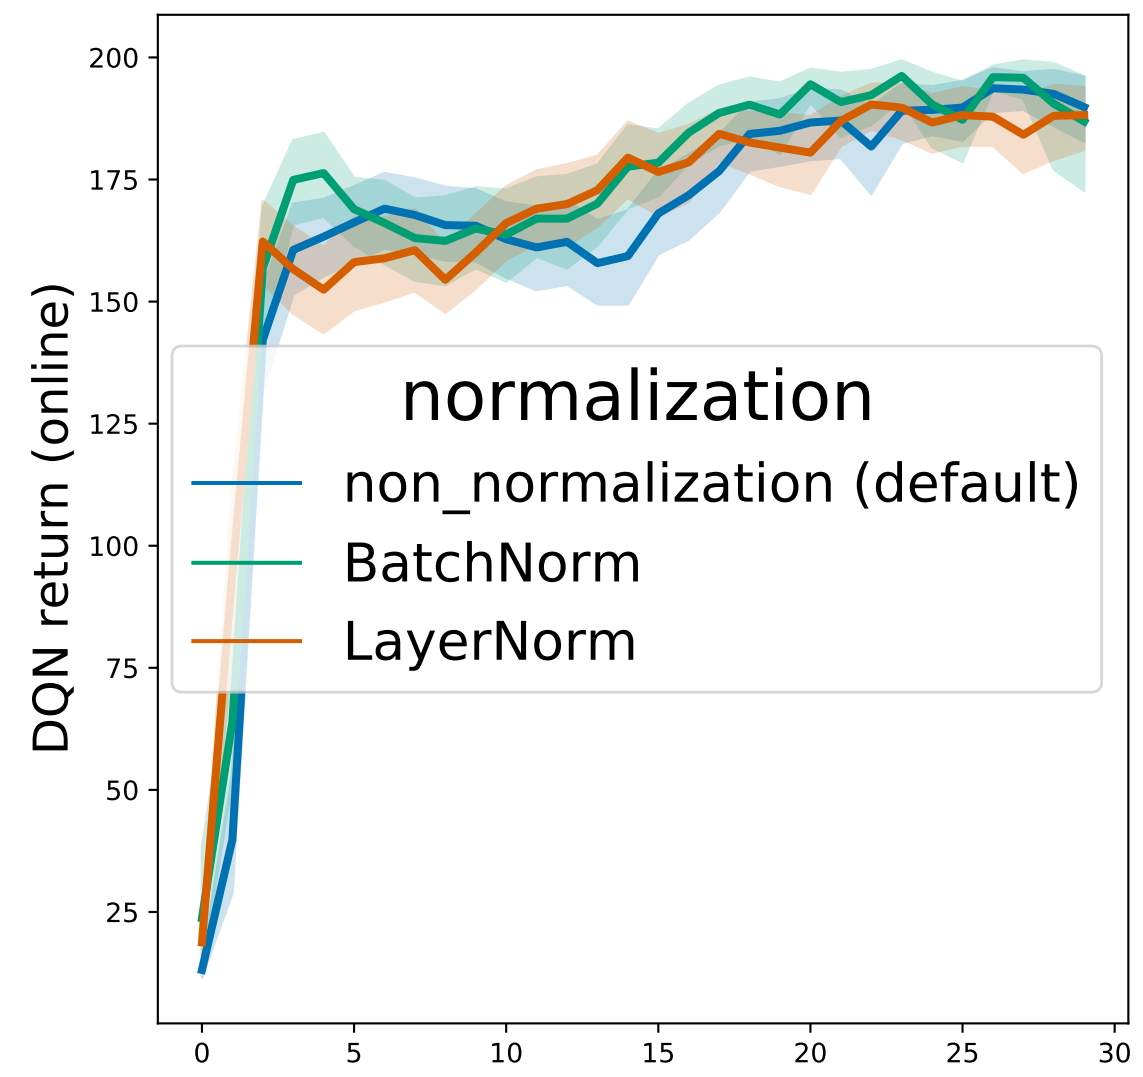

LunarLander

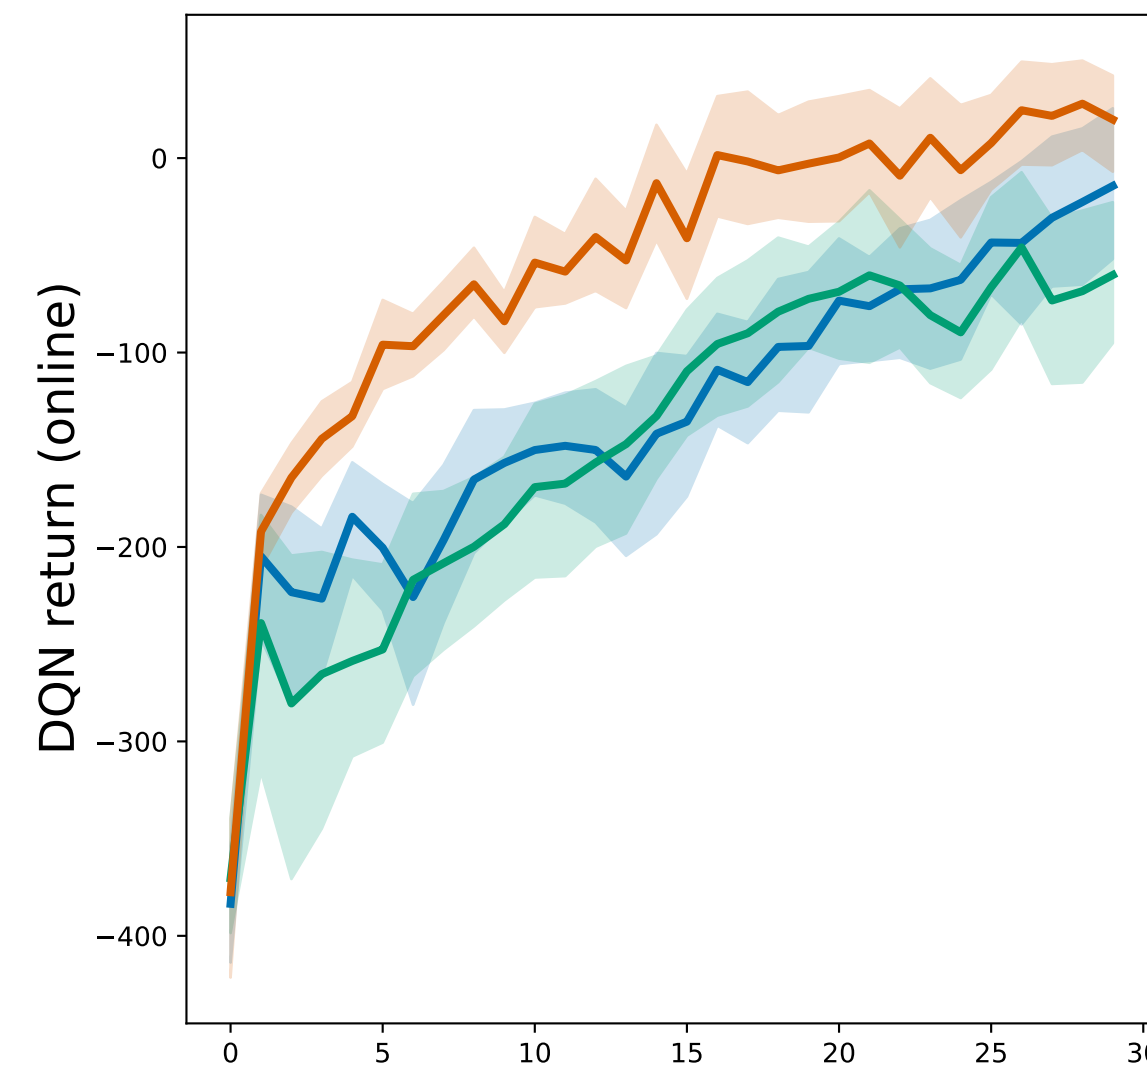

MountainCar

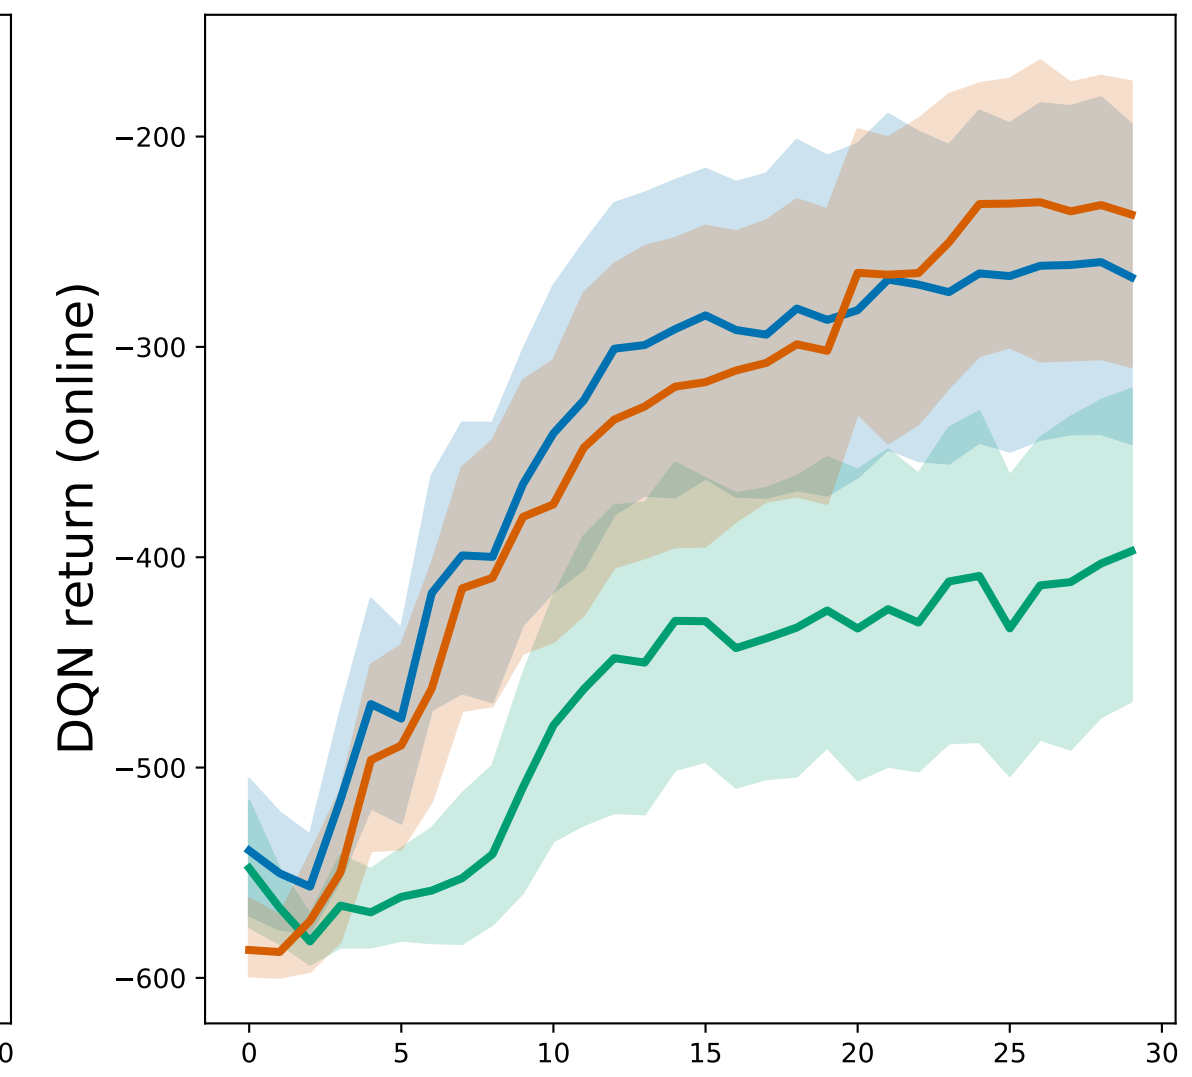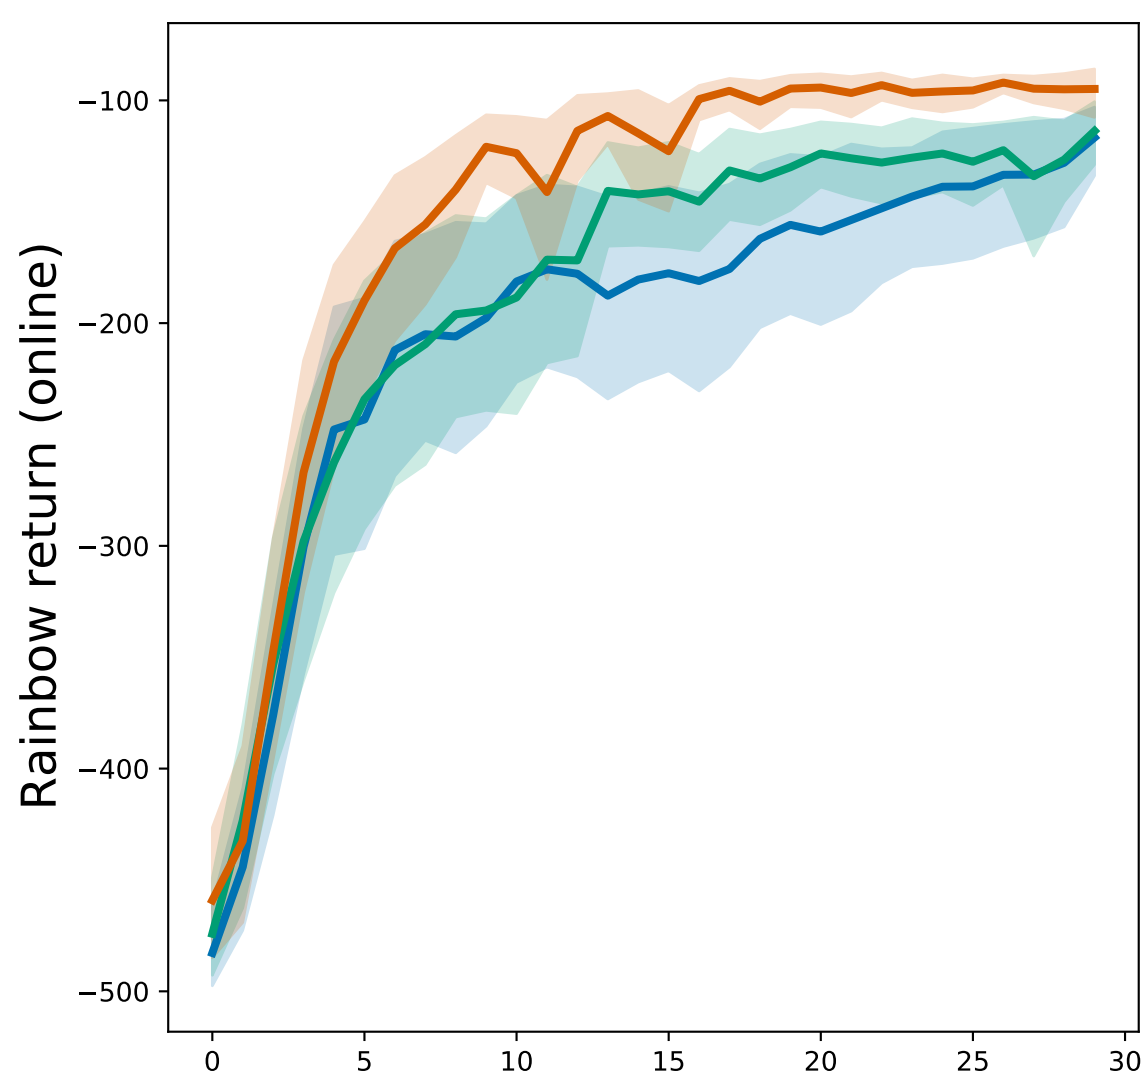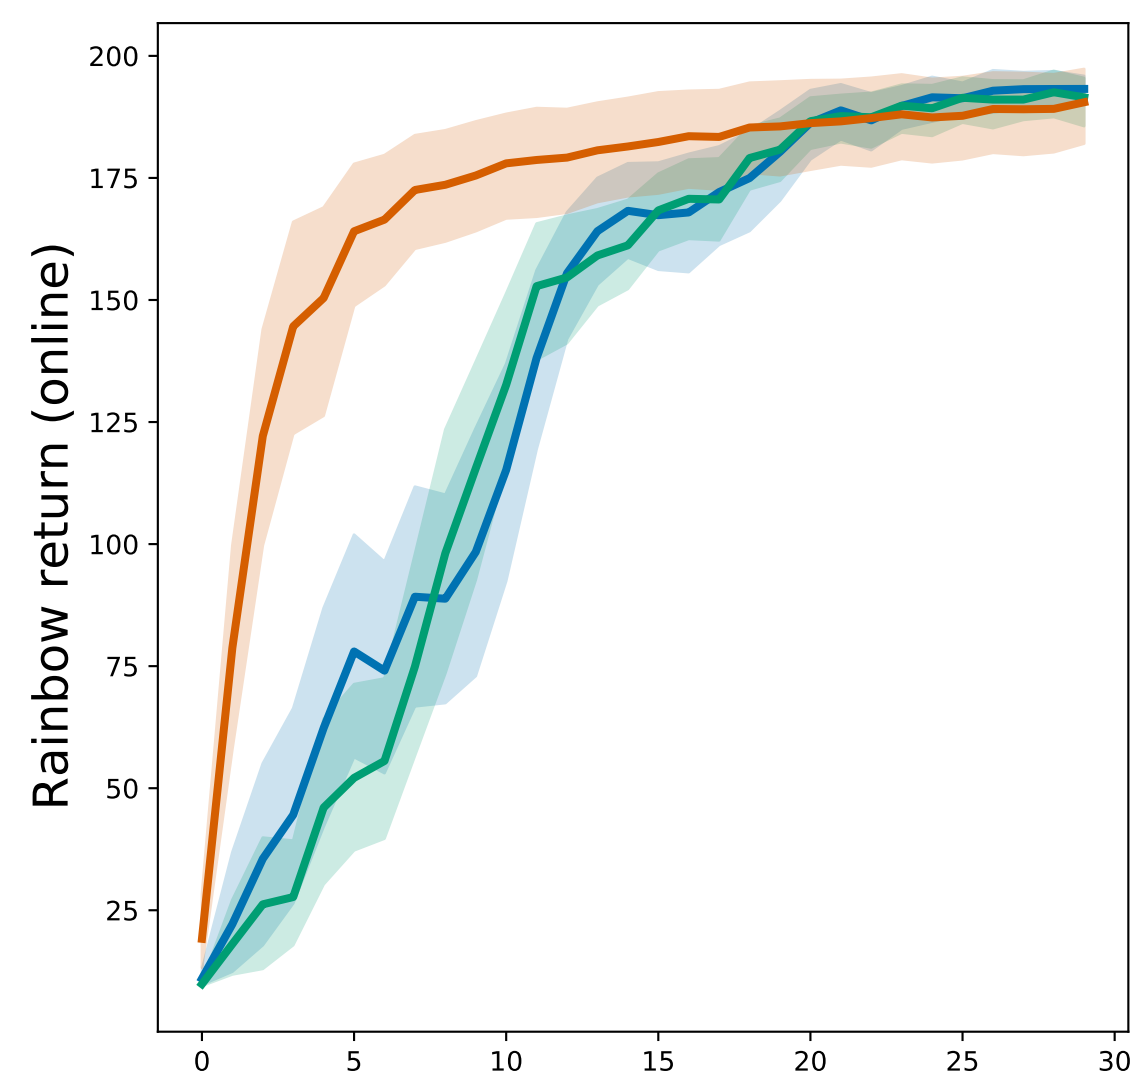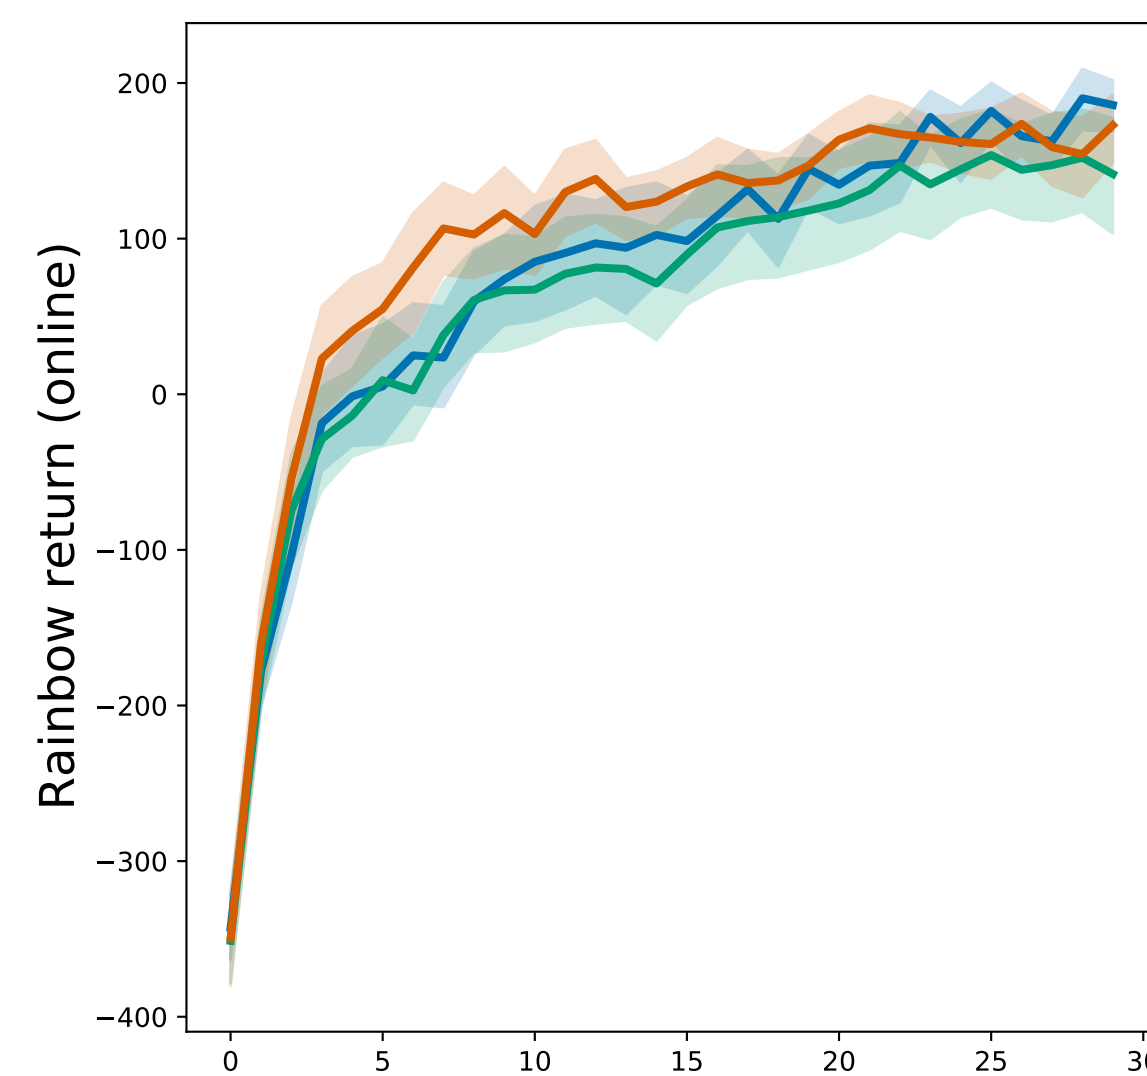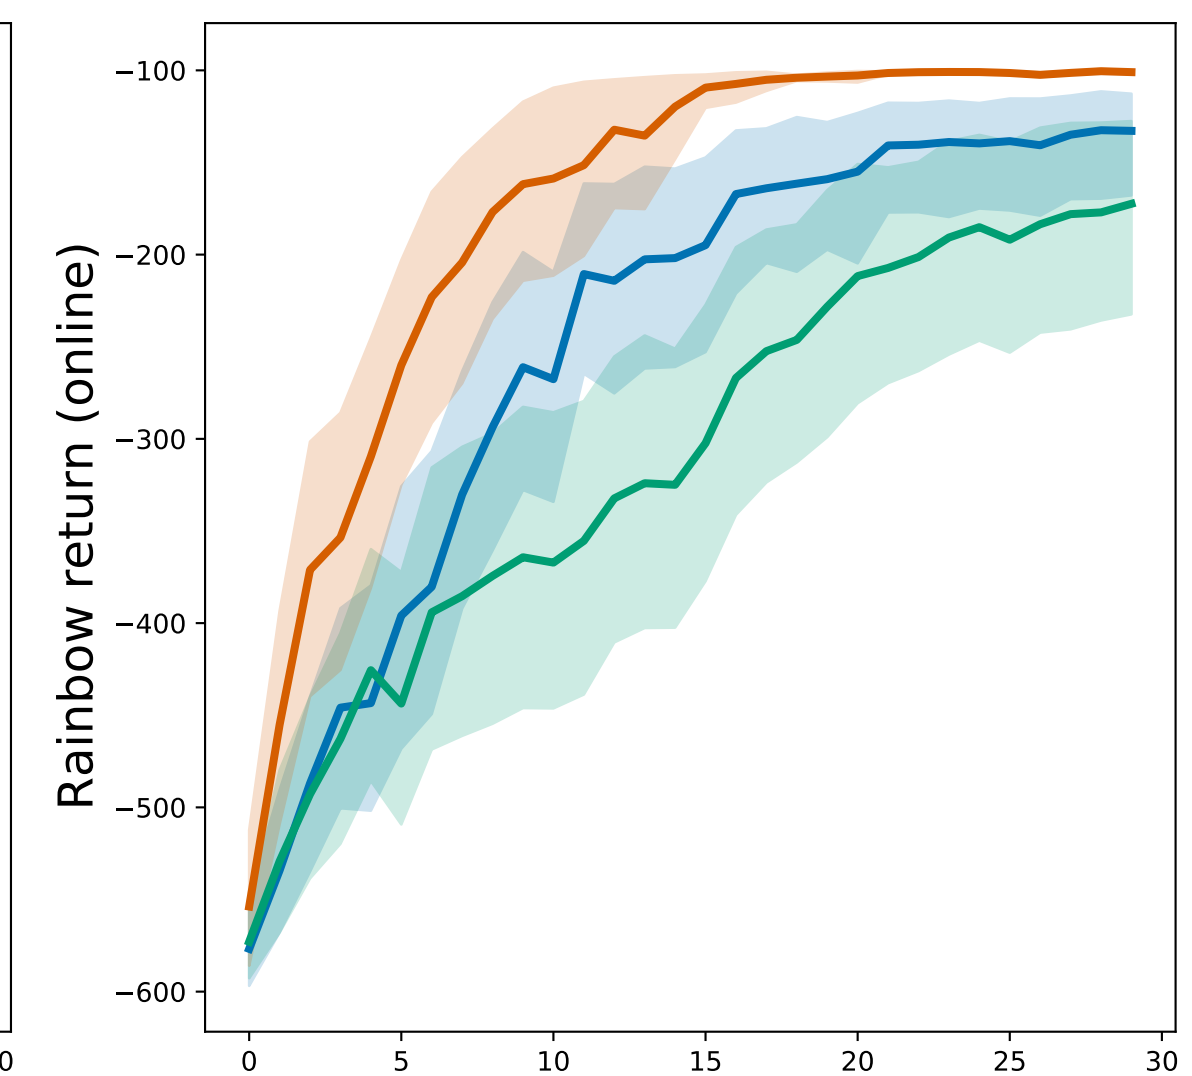

Supplement: supplementary_material [file attachment]

Acrobot

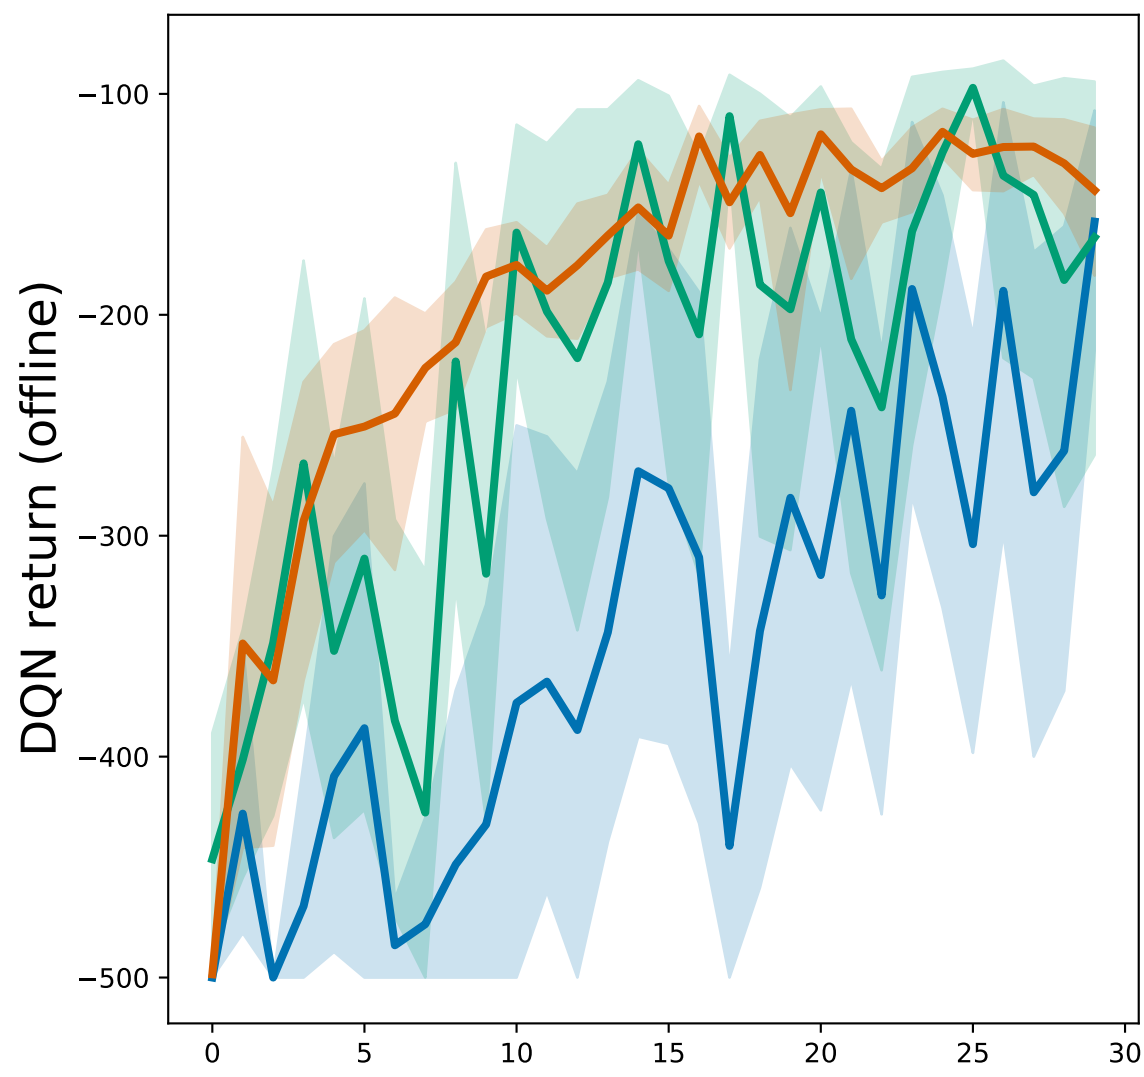

CartPole

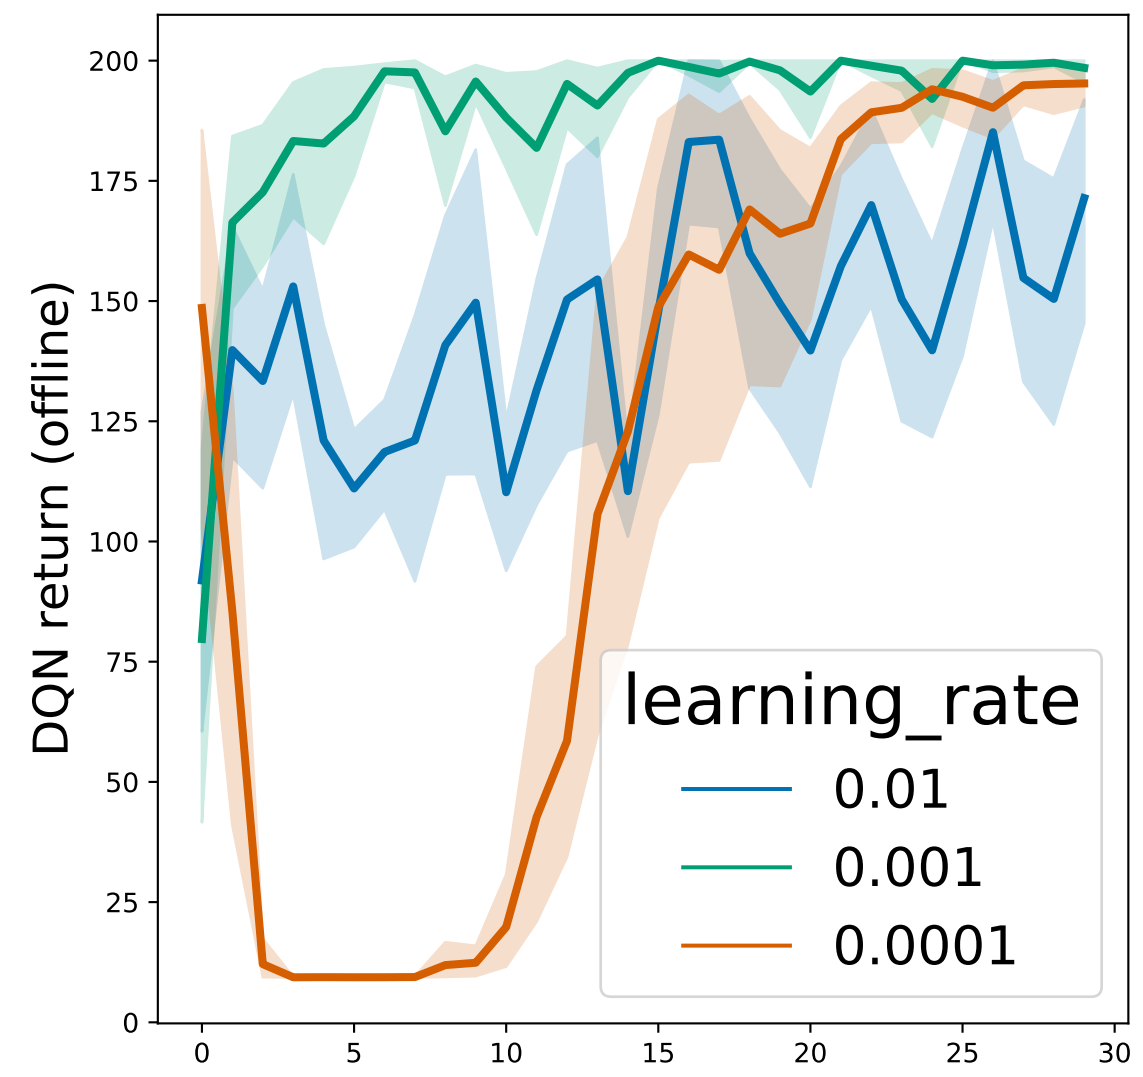

LunarLander

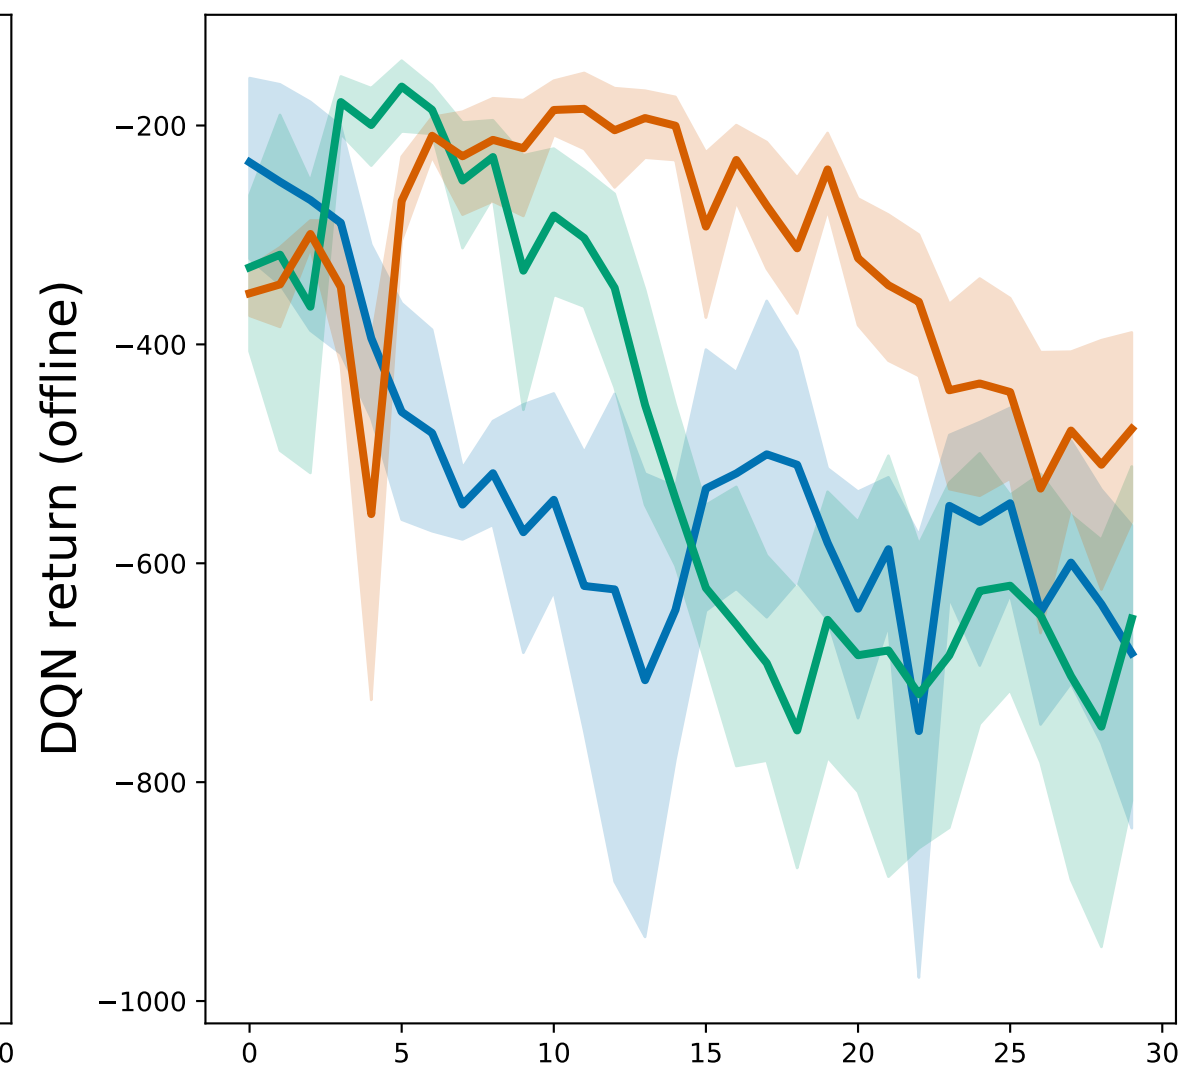

MountainCar

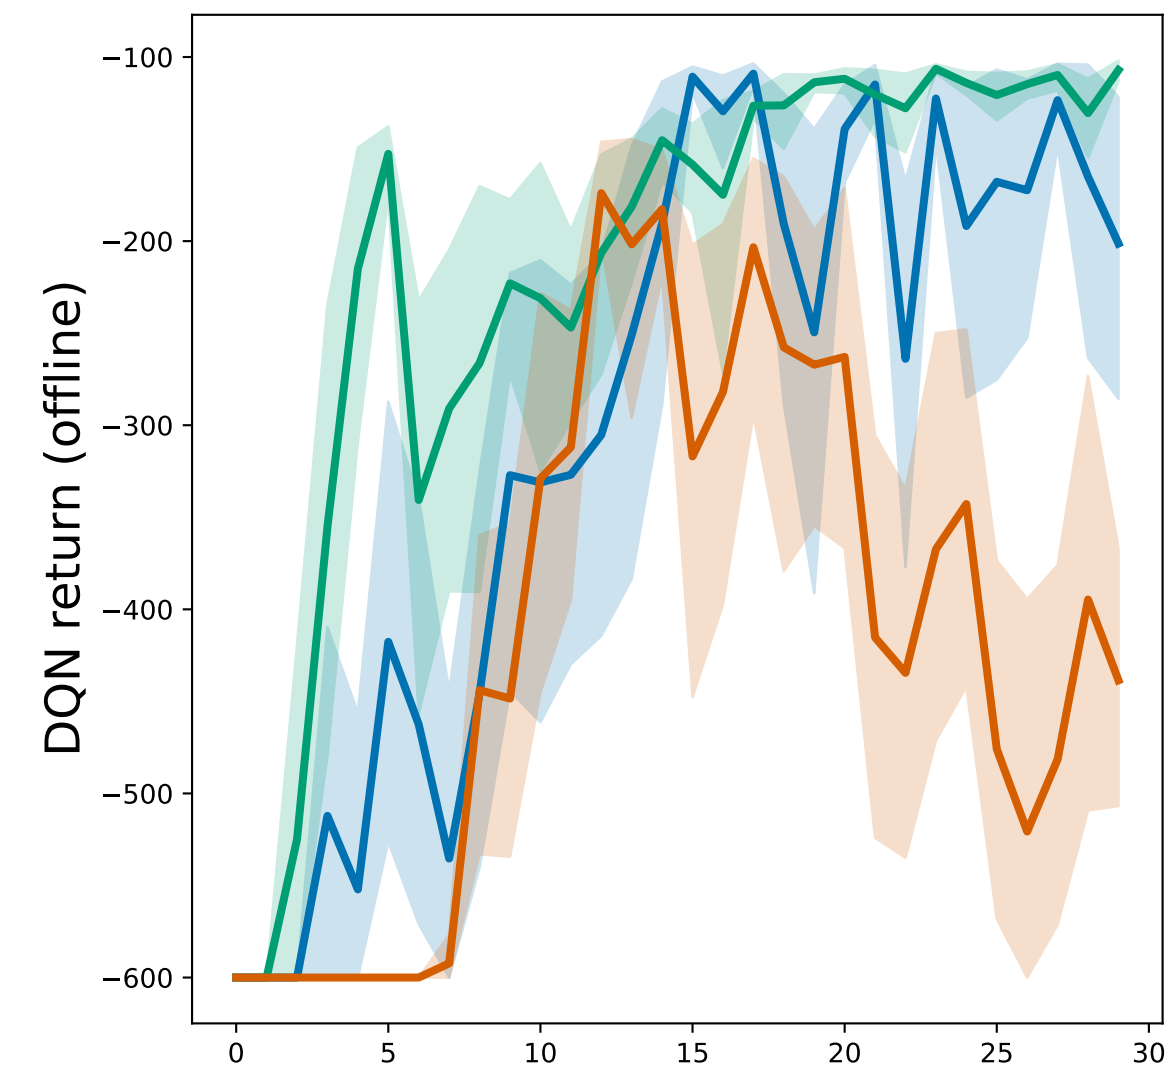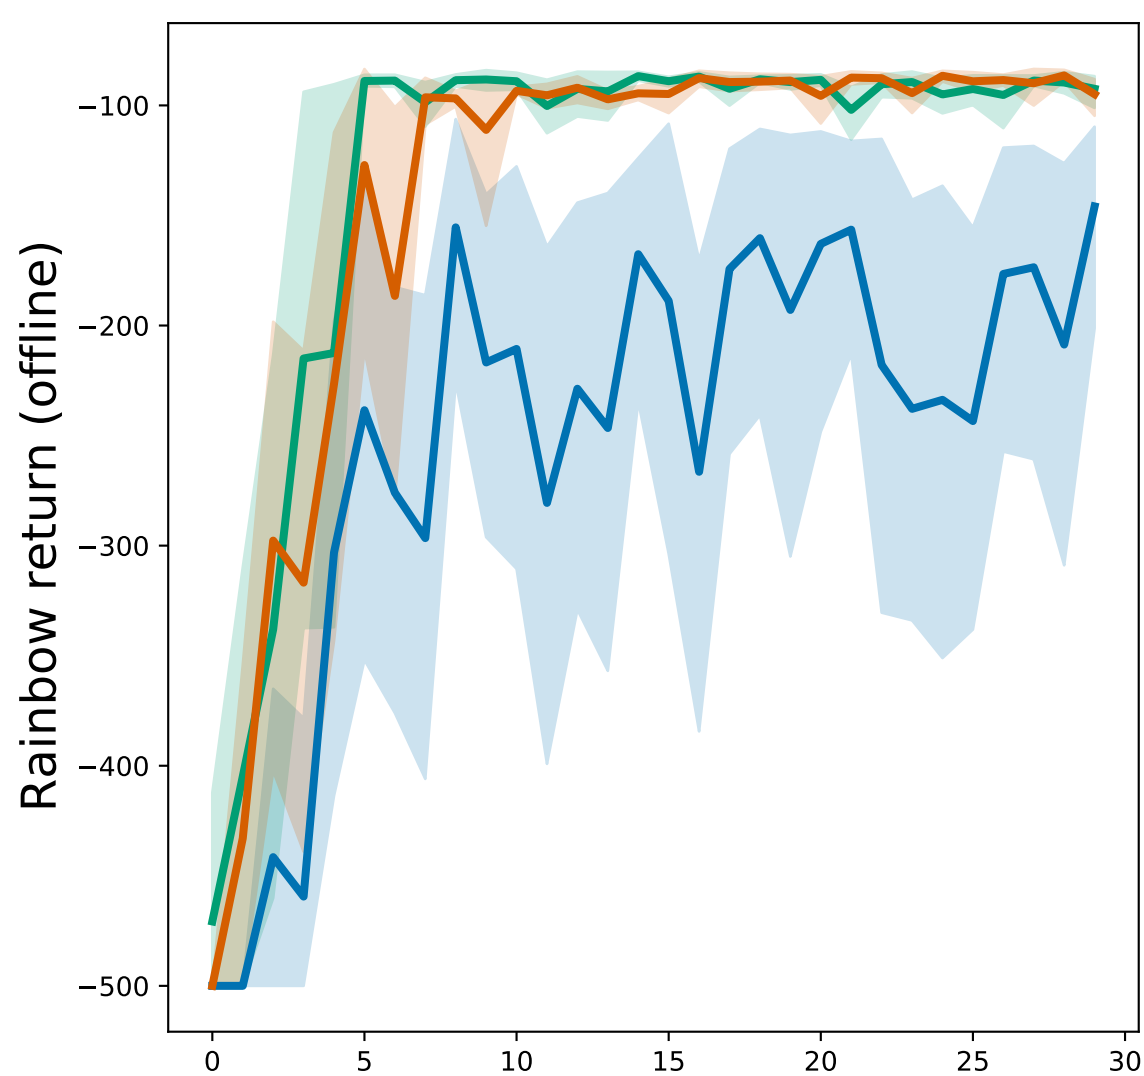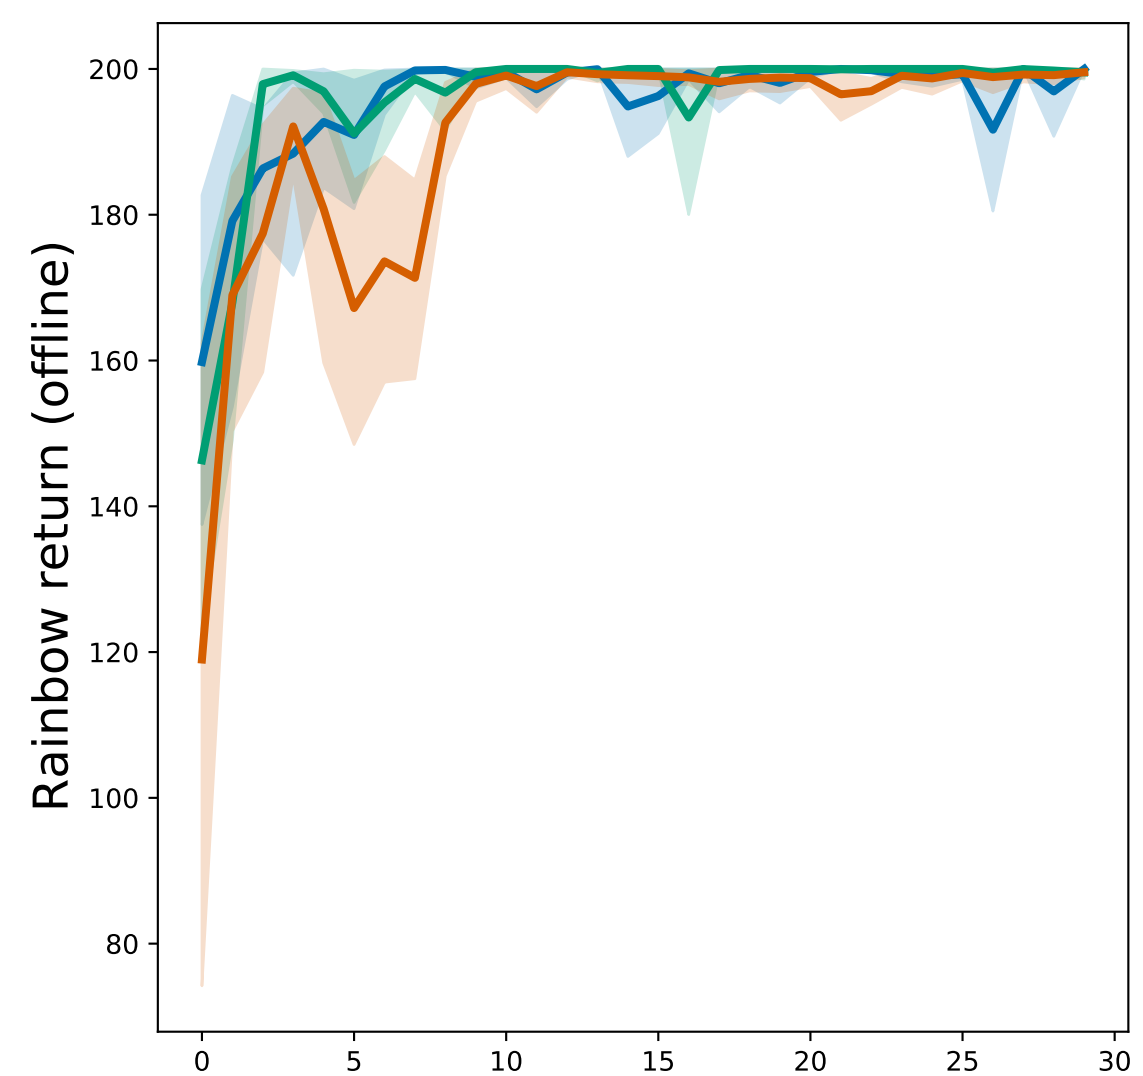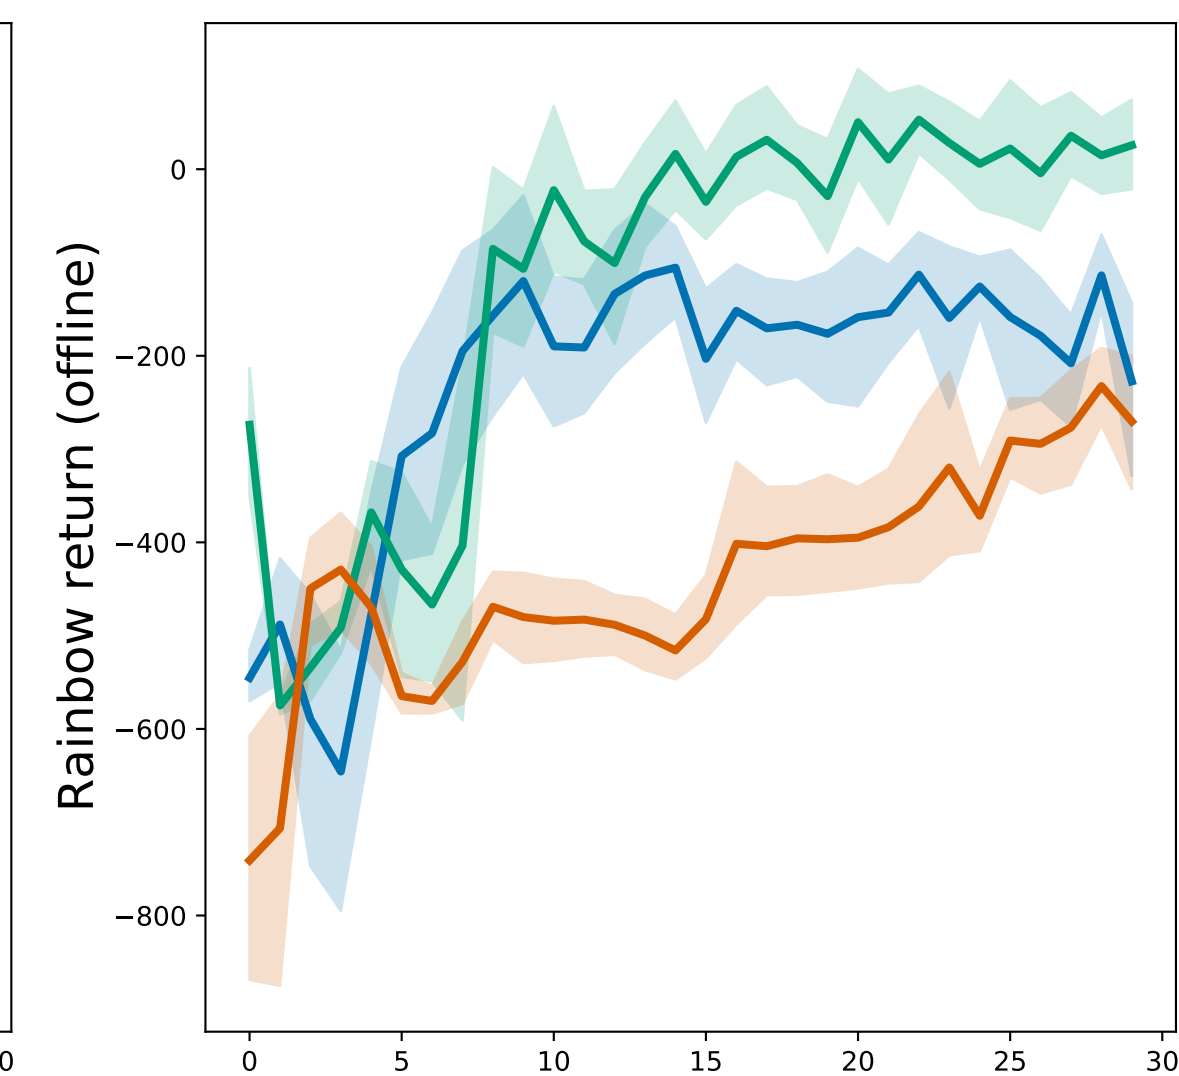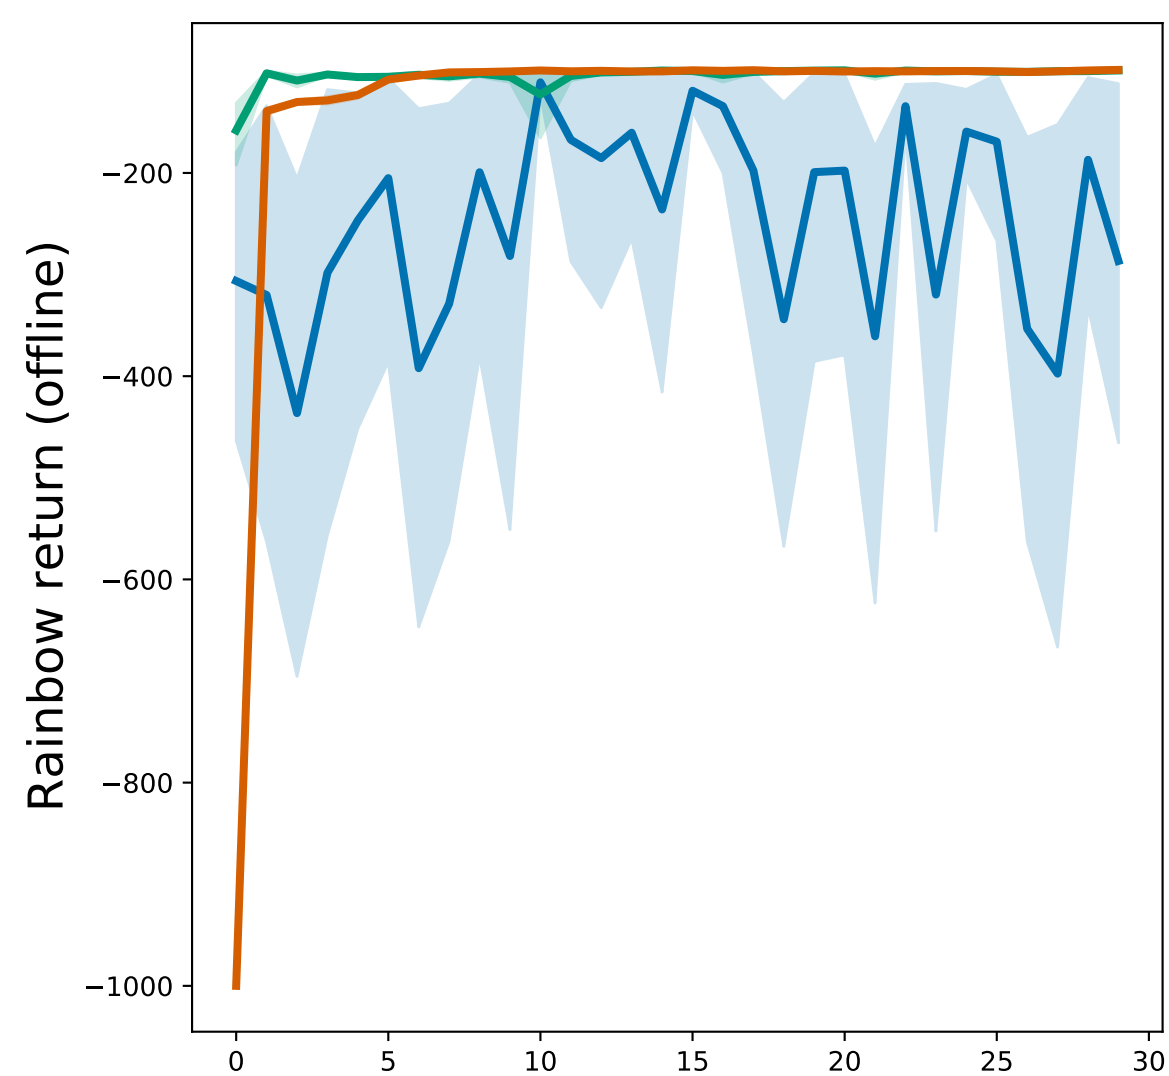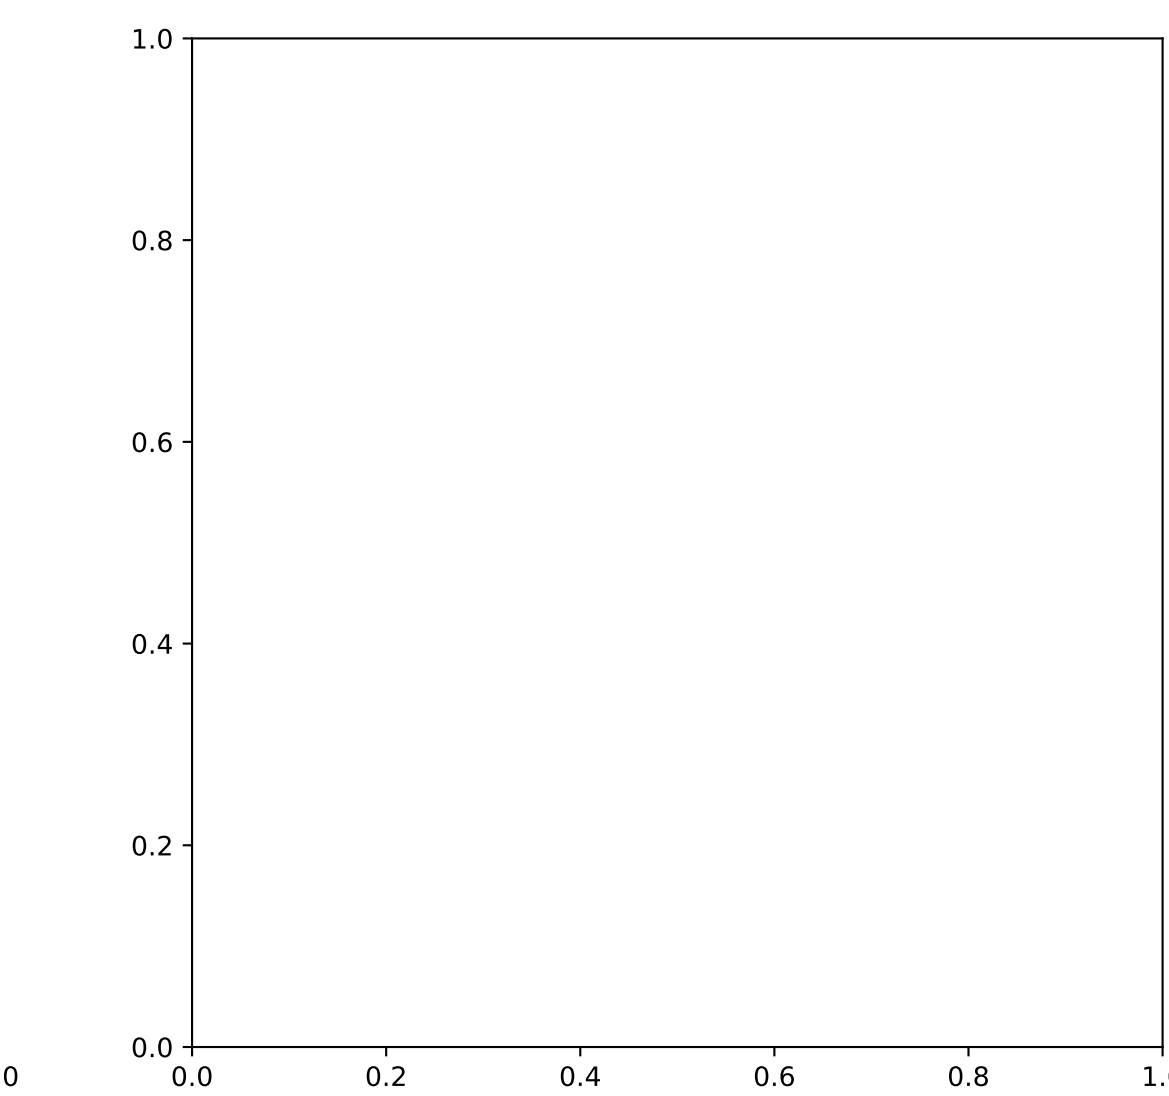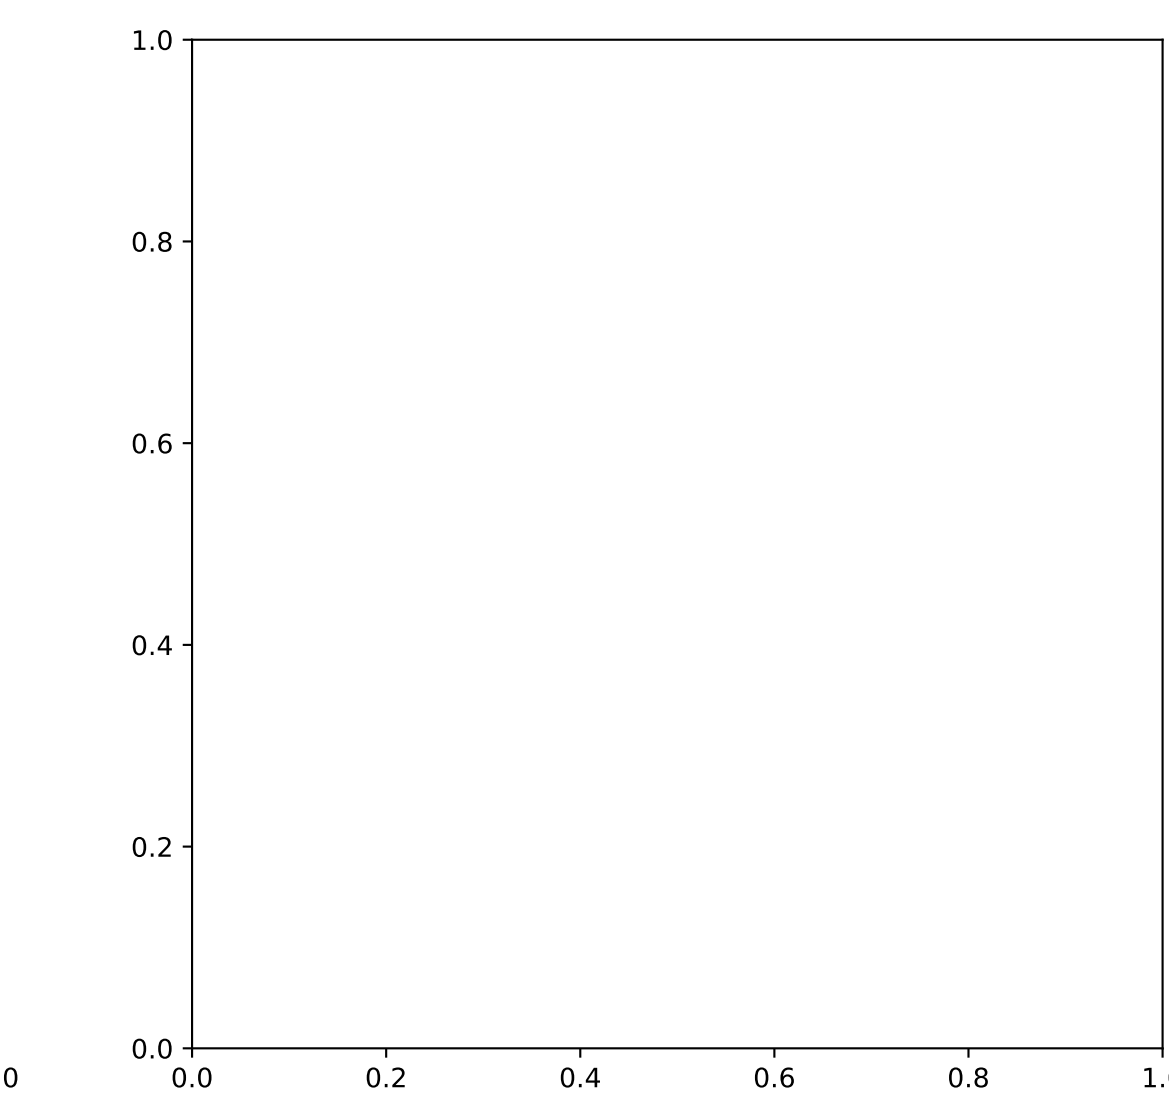

Supplement: supplementary_material [file attachment]

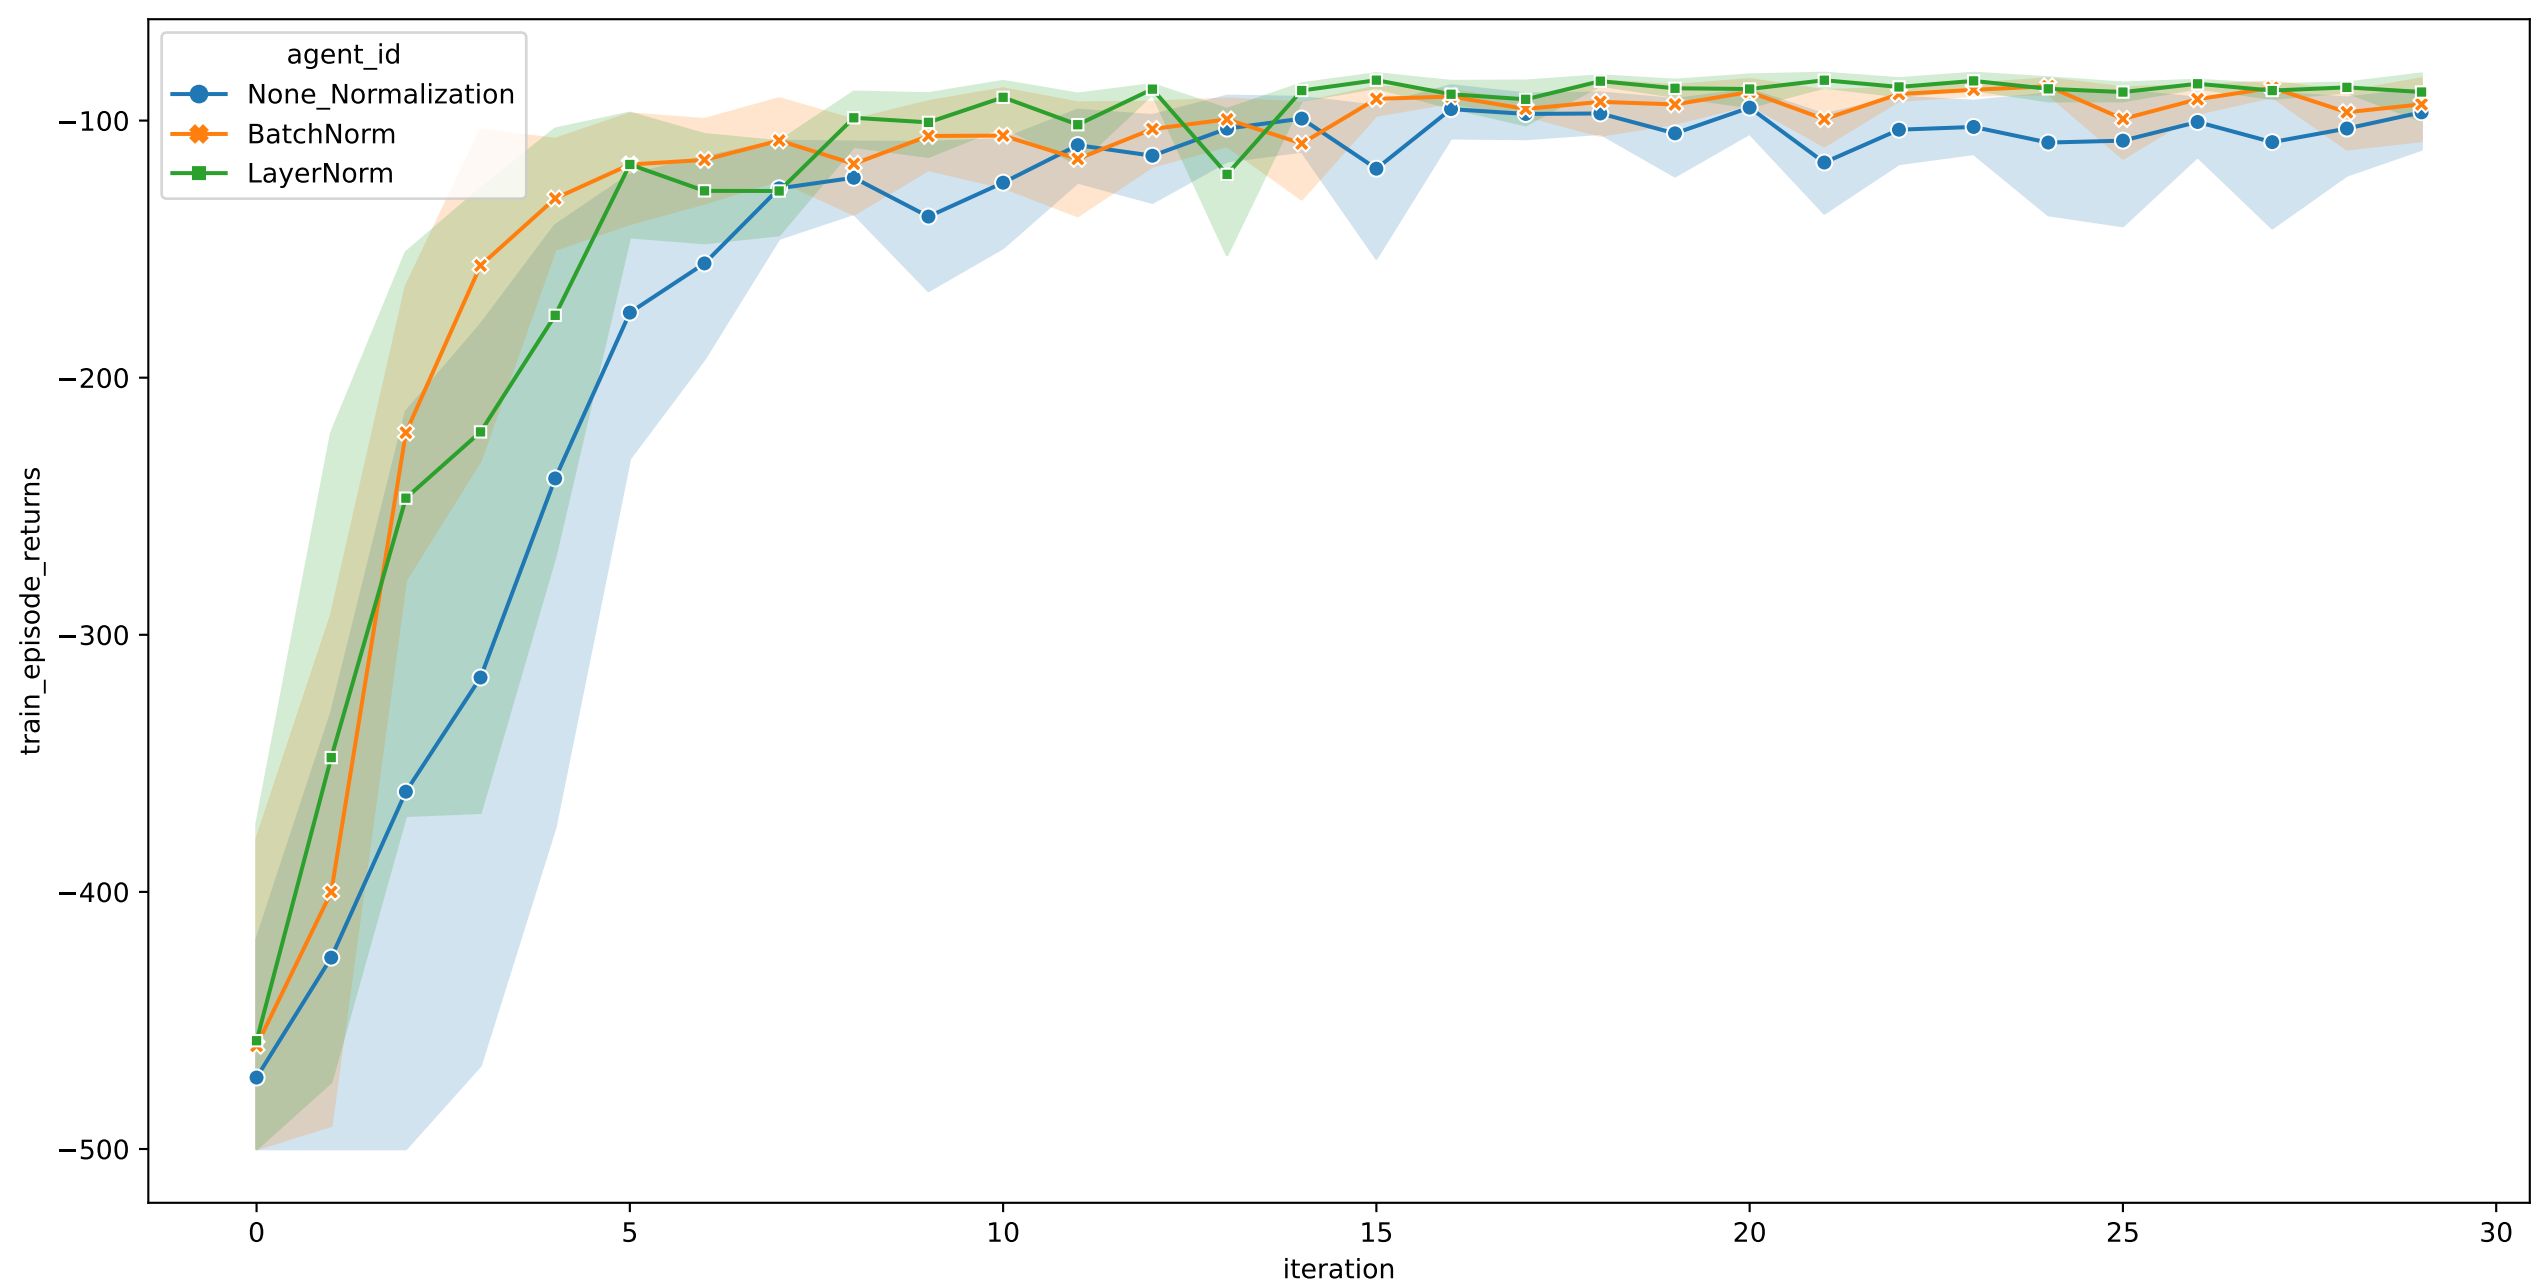

Supplement: supplementary_material [file attachment]

Acrobot

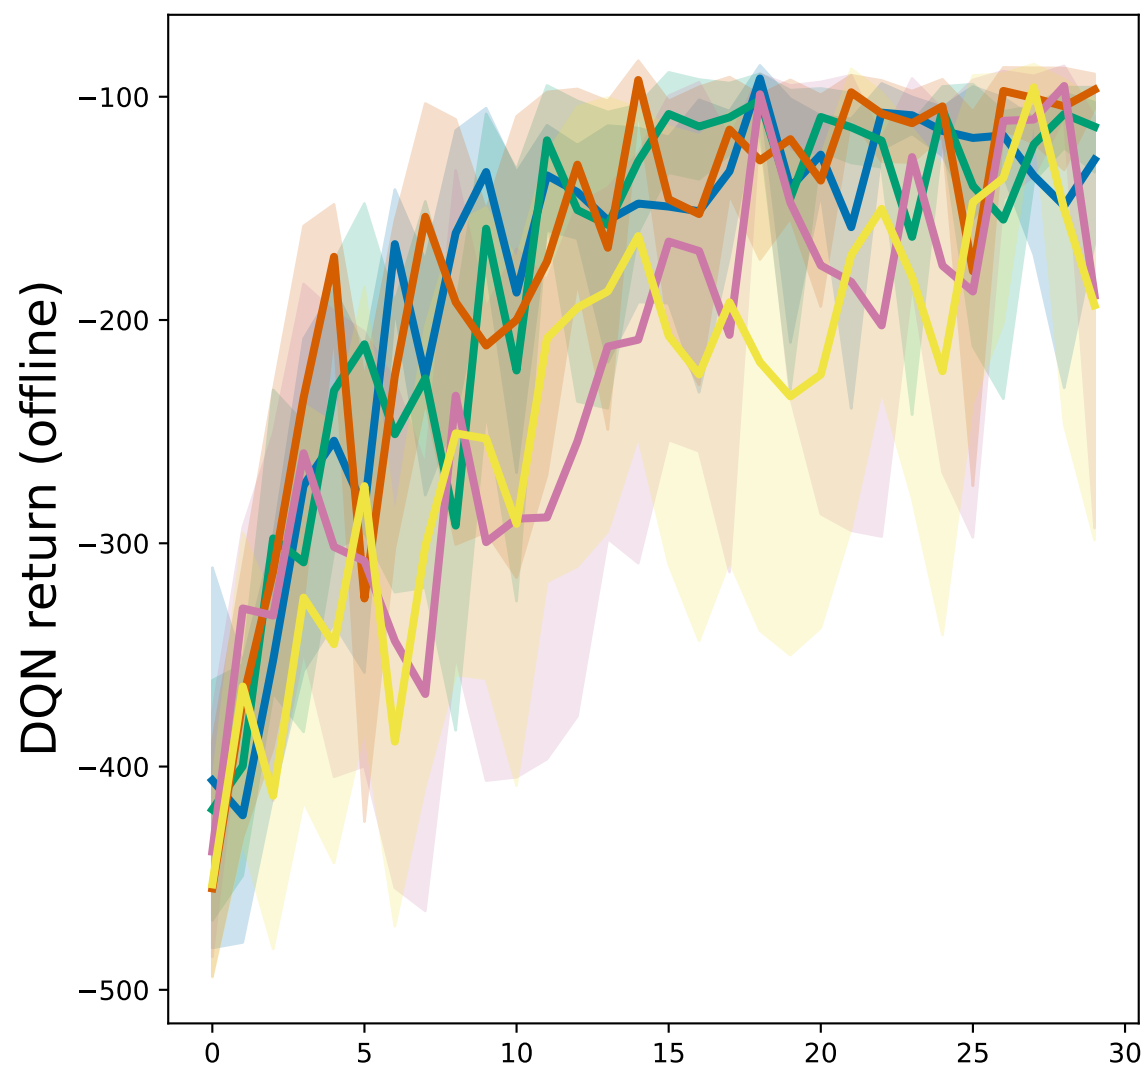

CartPole

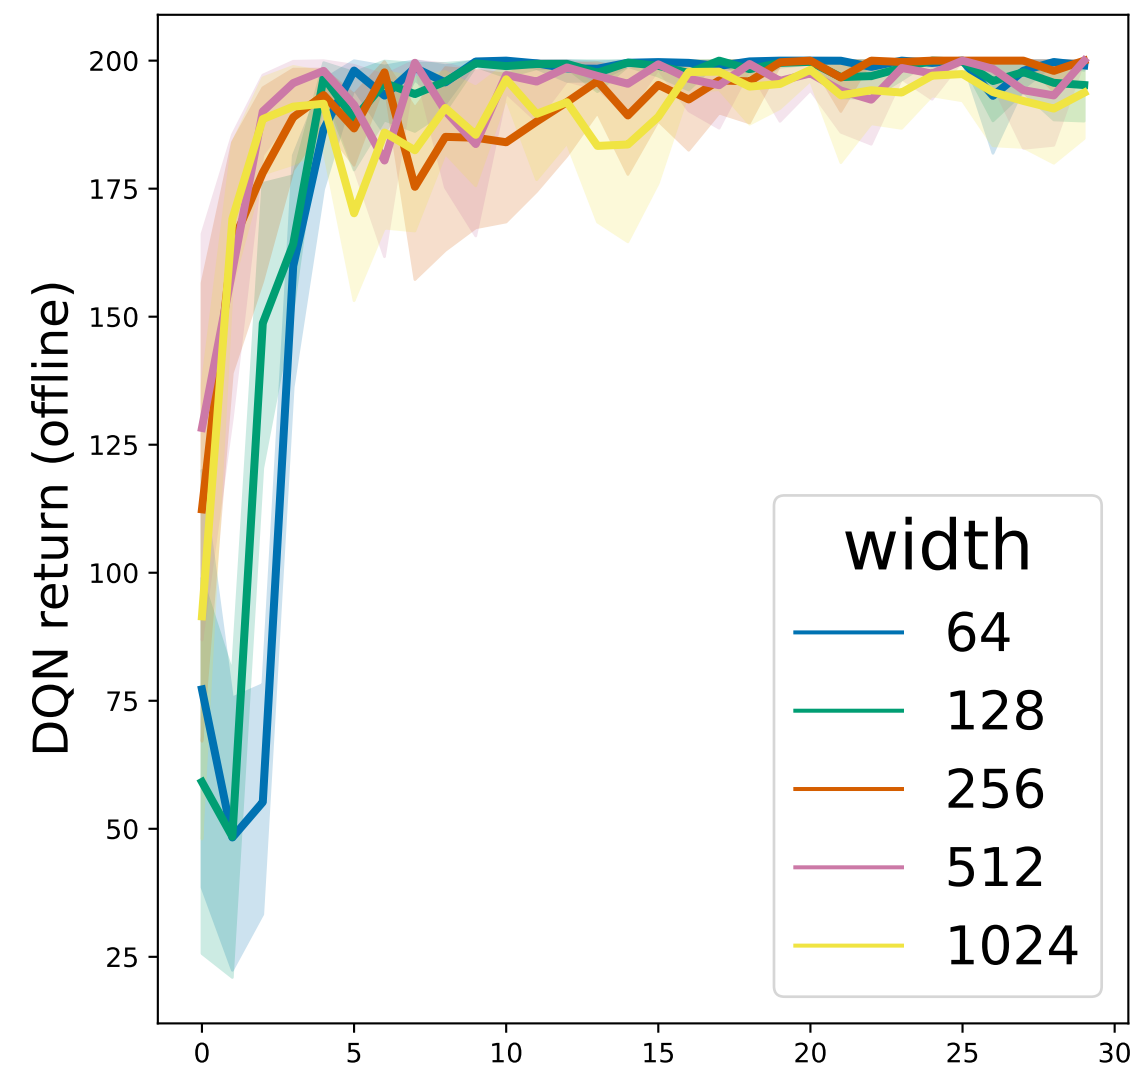

LunarLander

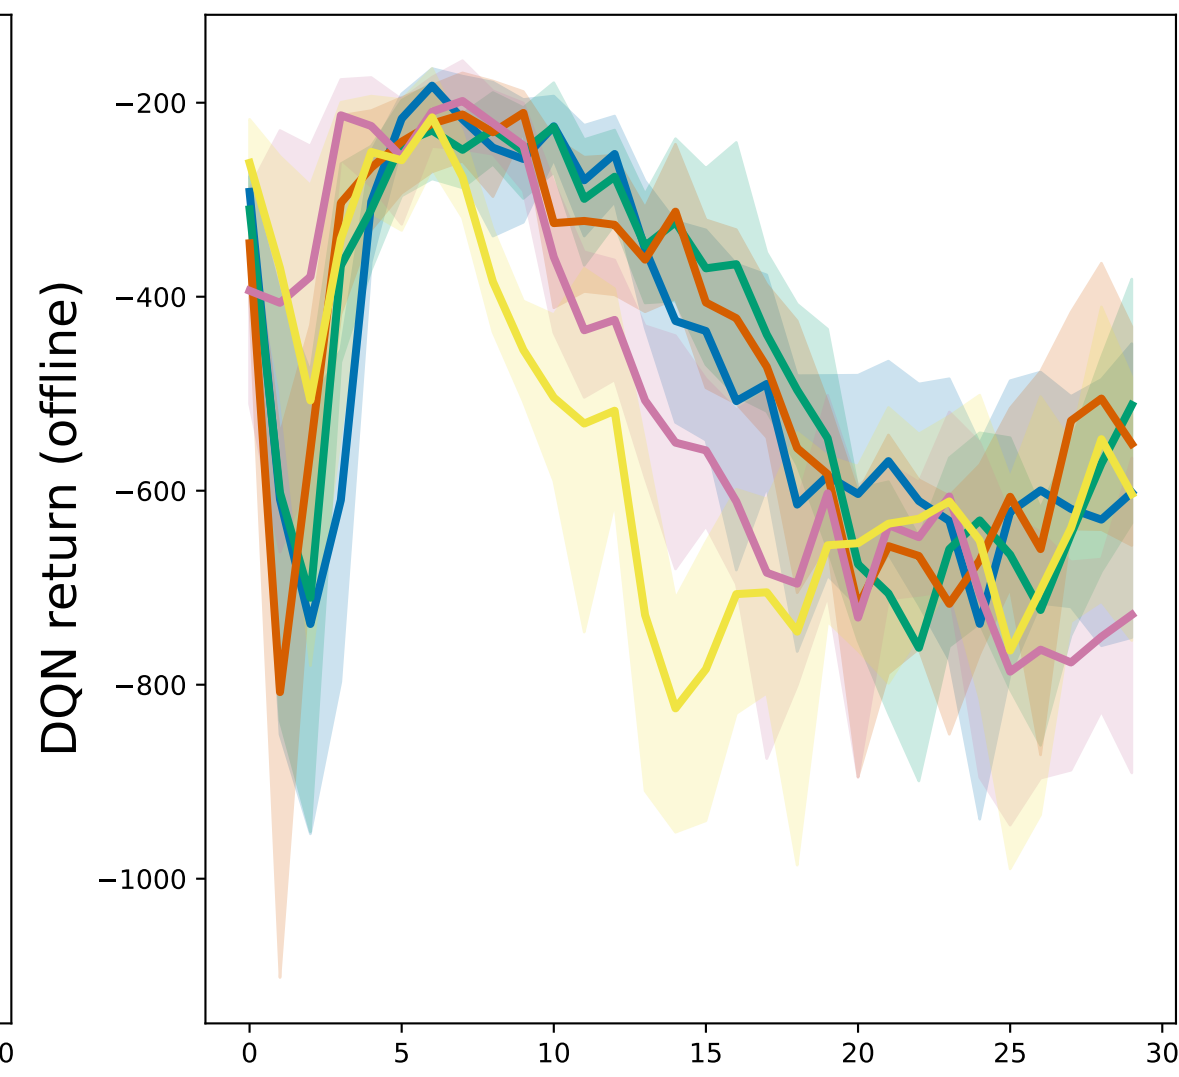

MountainCar

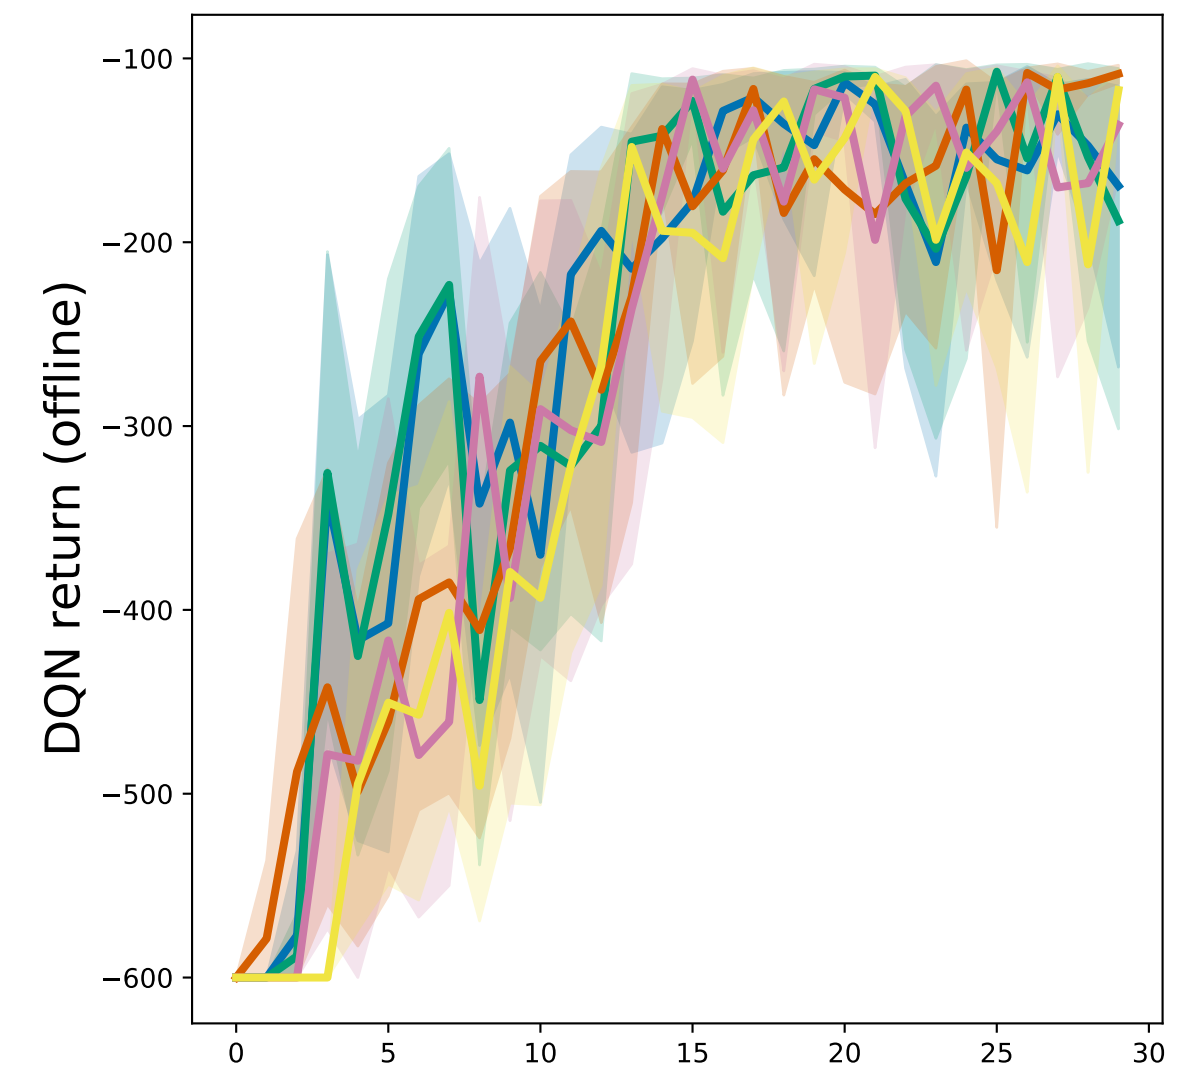

Rainbow return (offline)

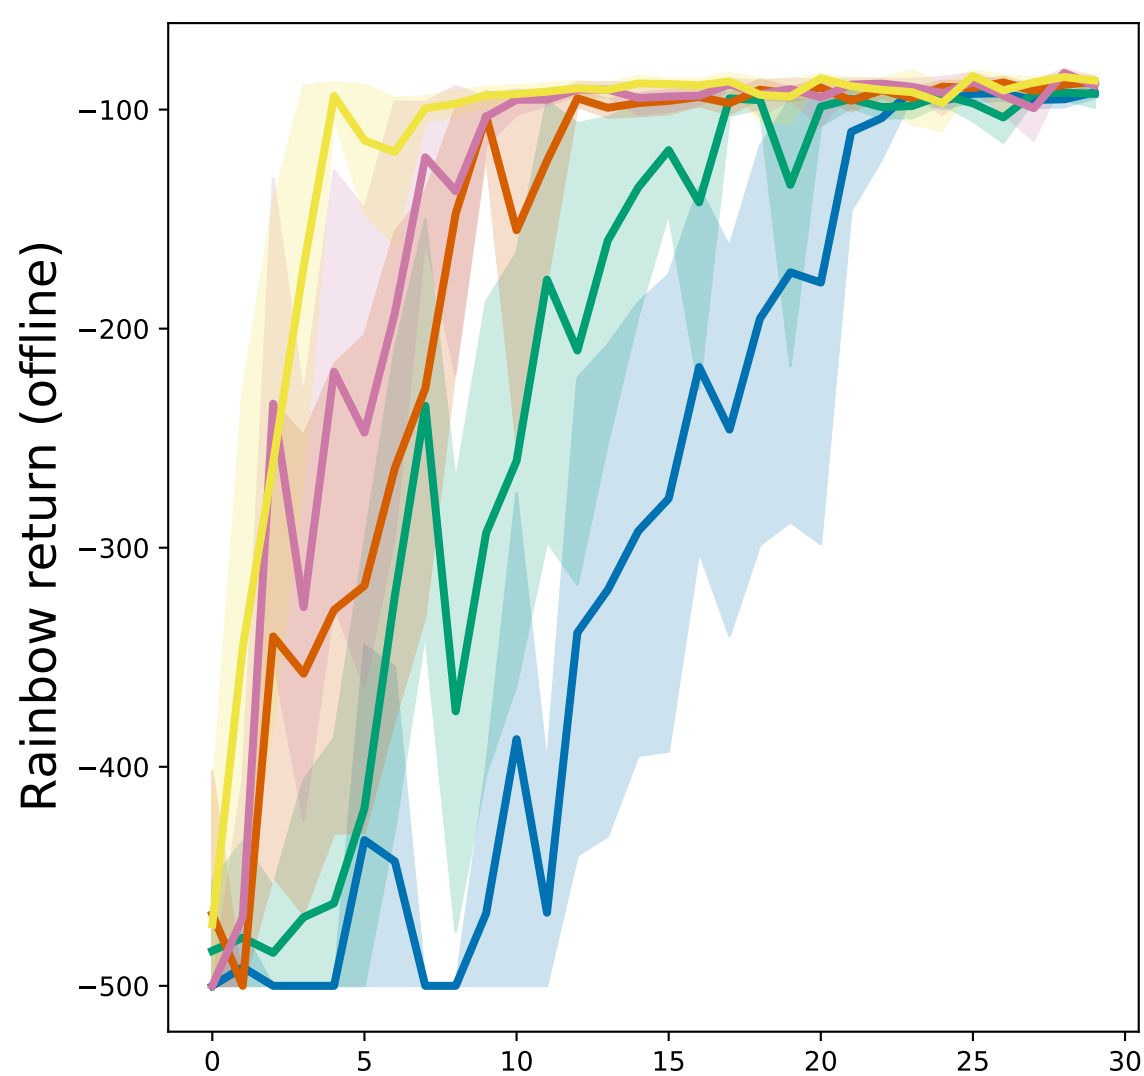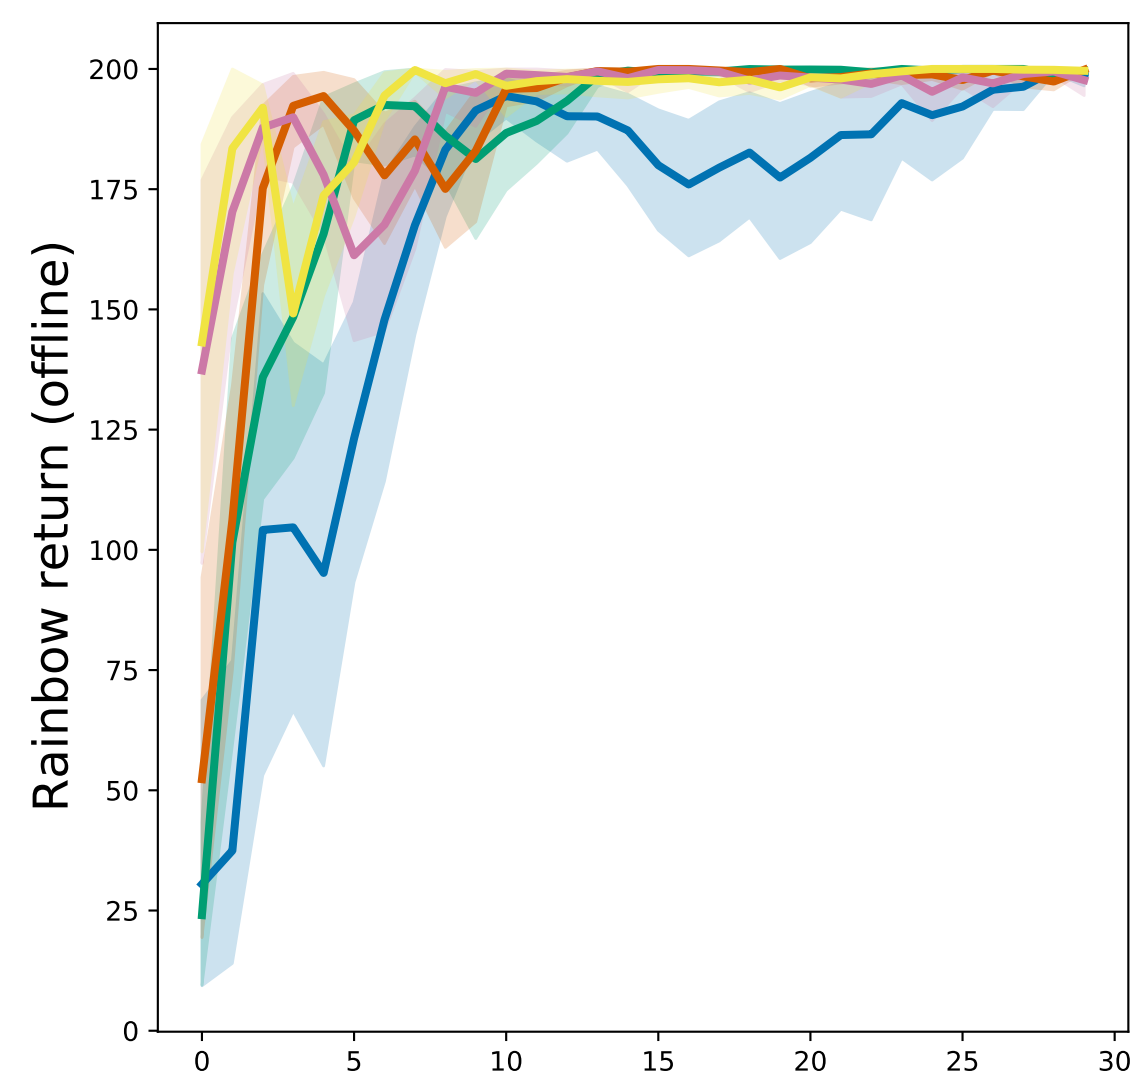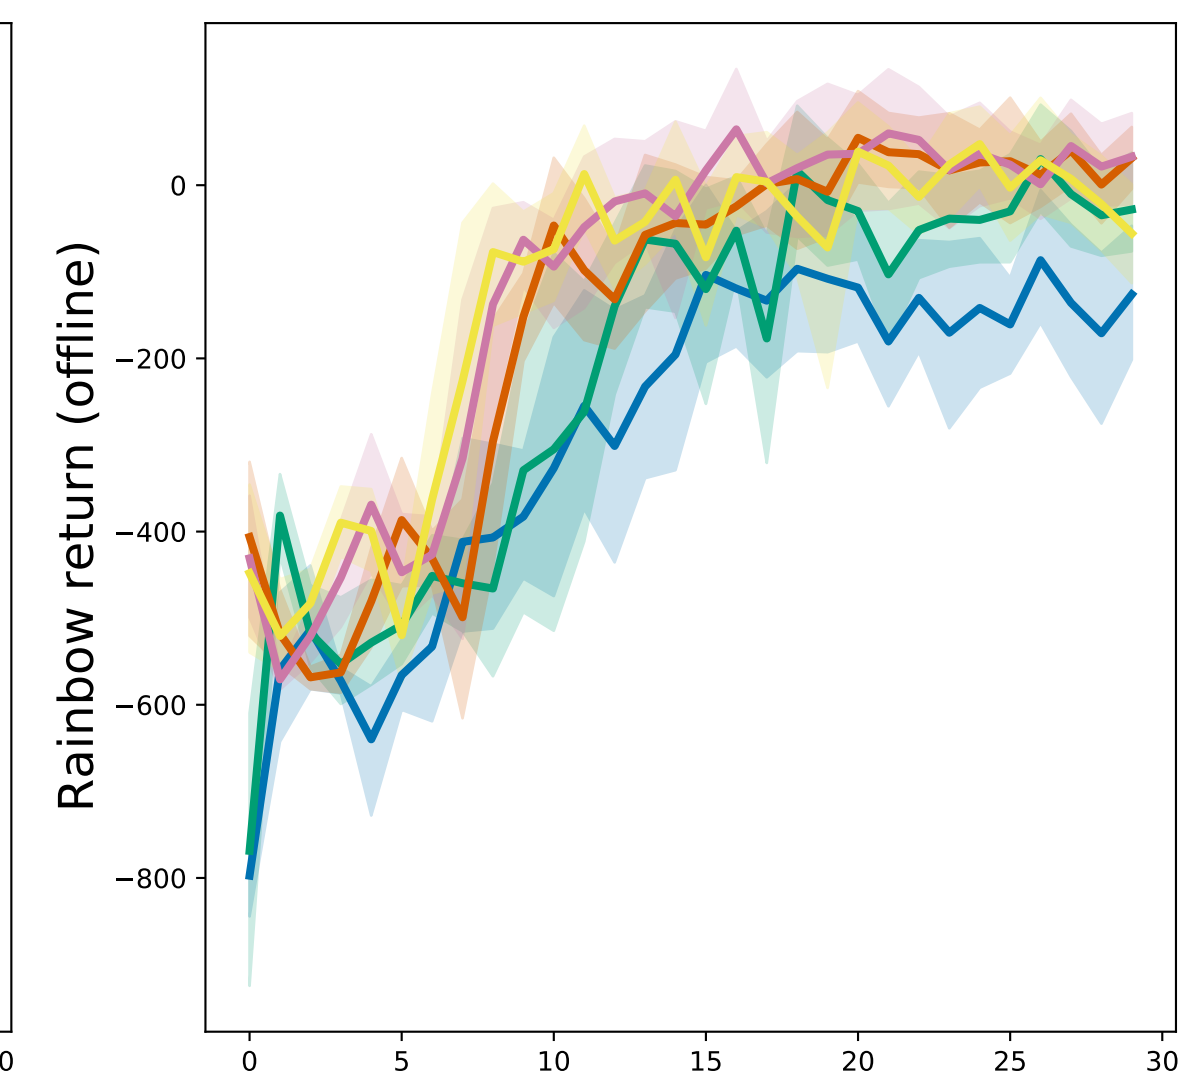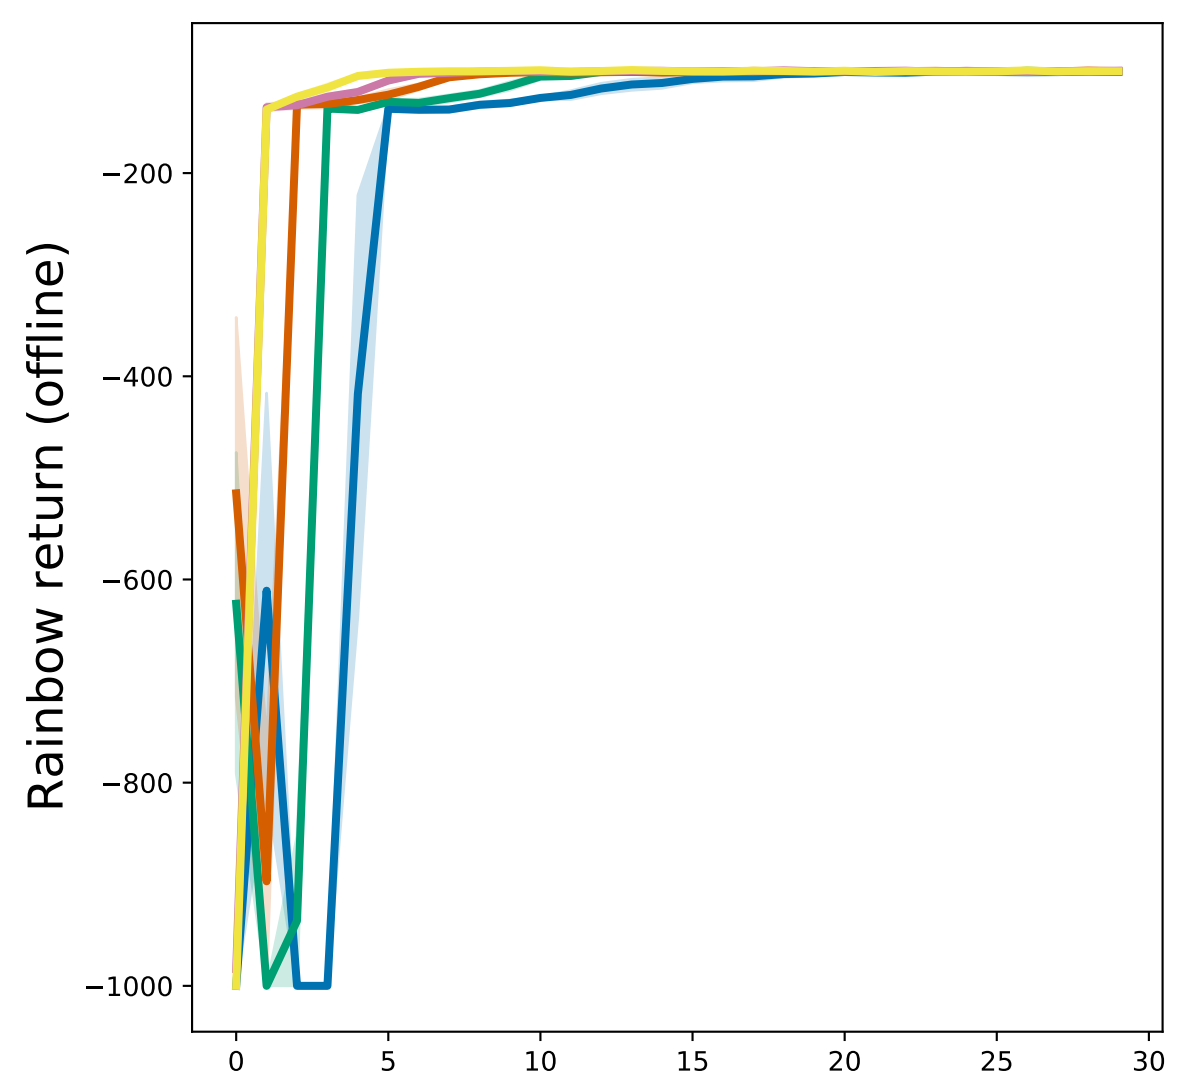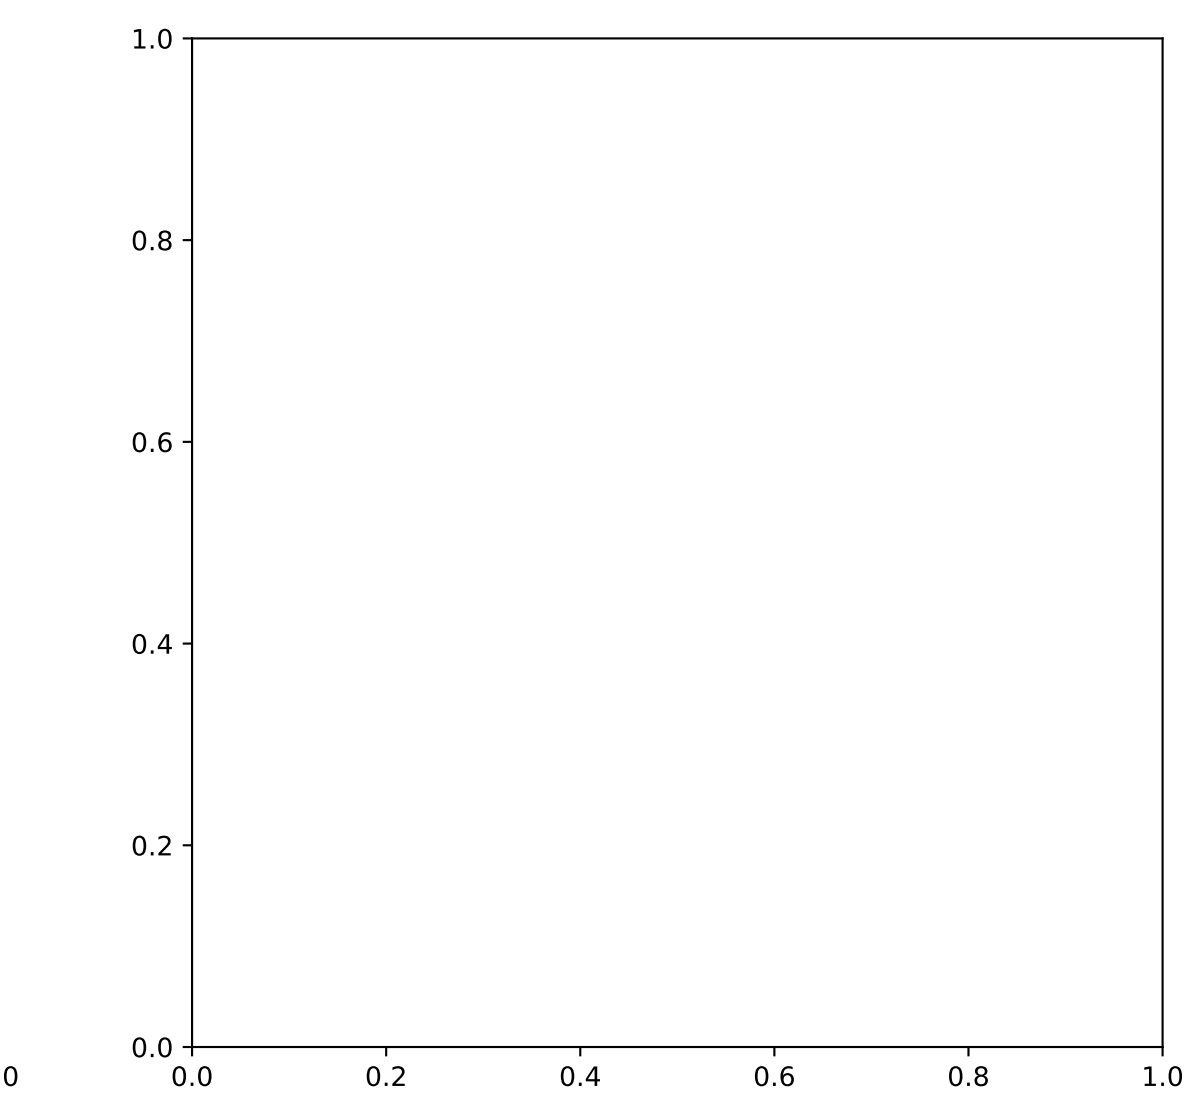

Supplement: supplementary_material [file attachment]

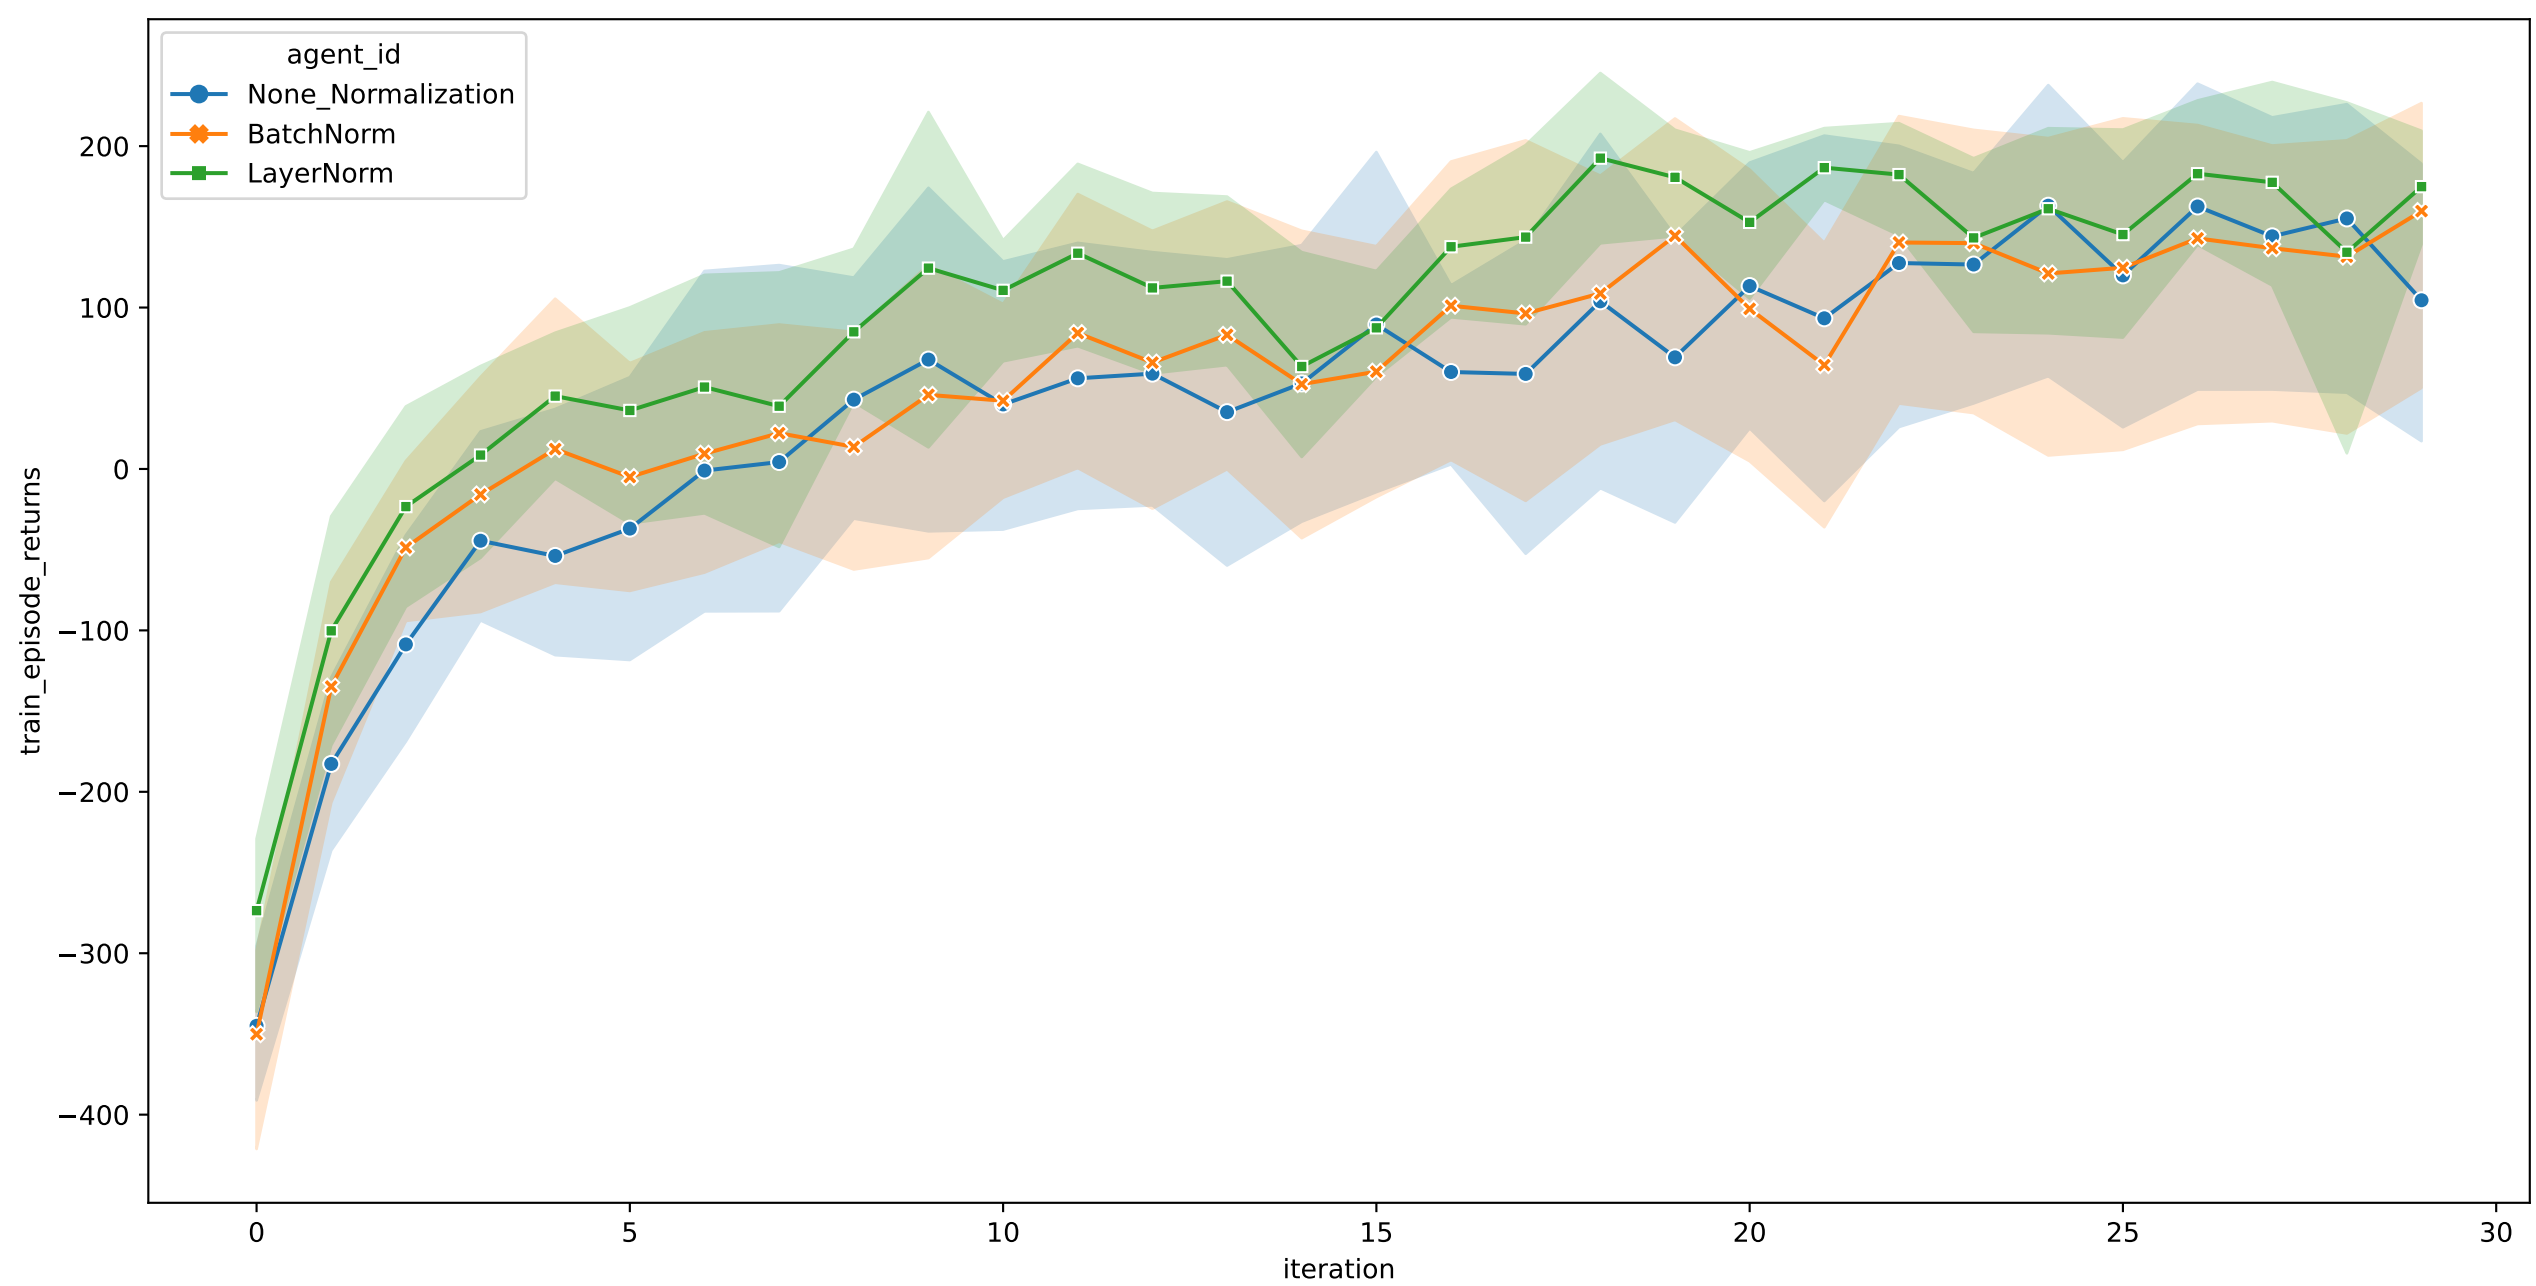

Supplement: supplementary_material [file attachment]

Acrobot

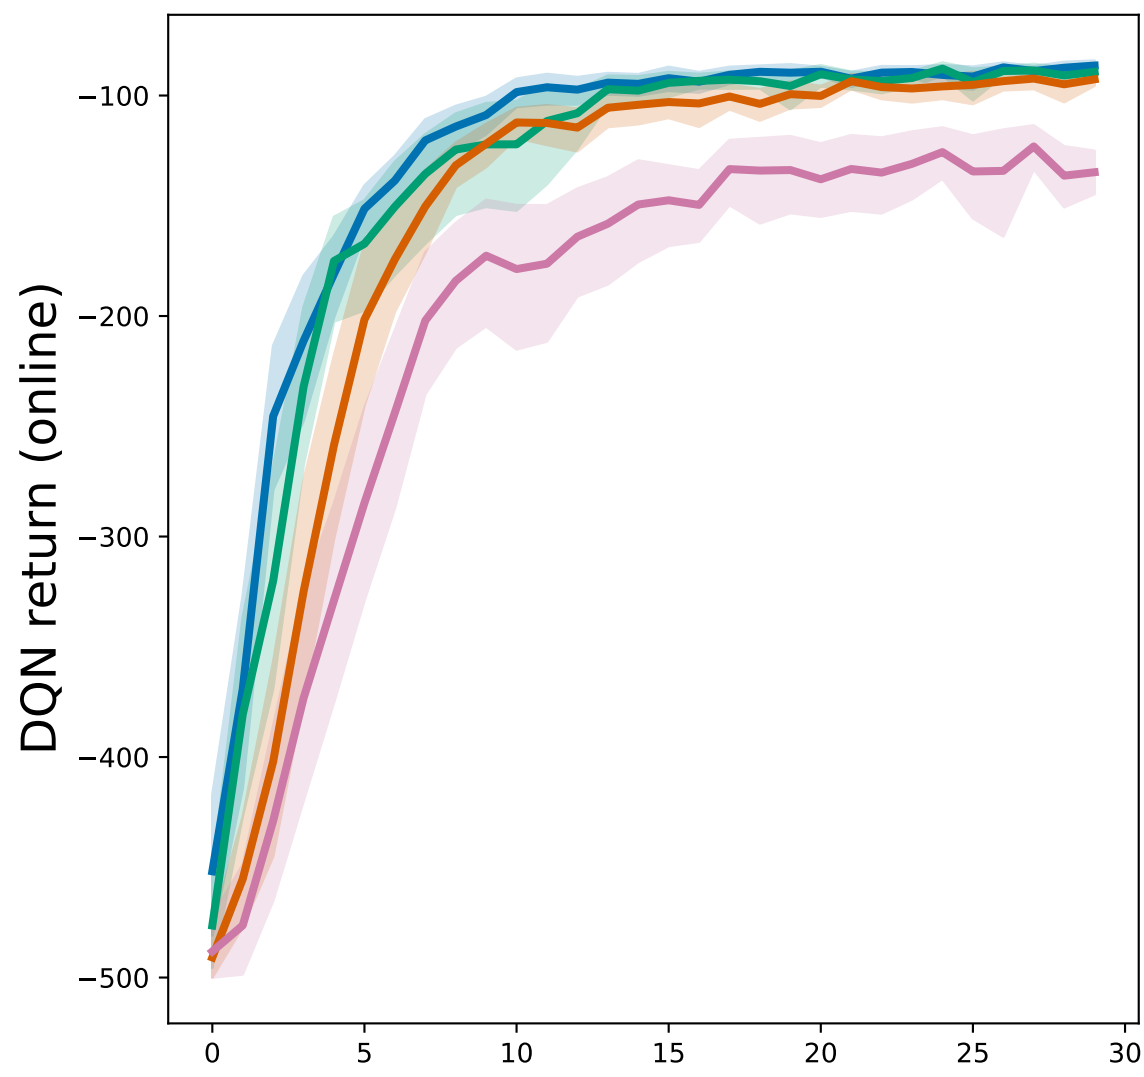

CartPole

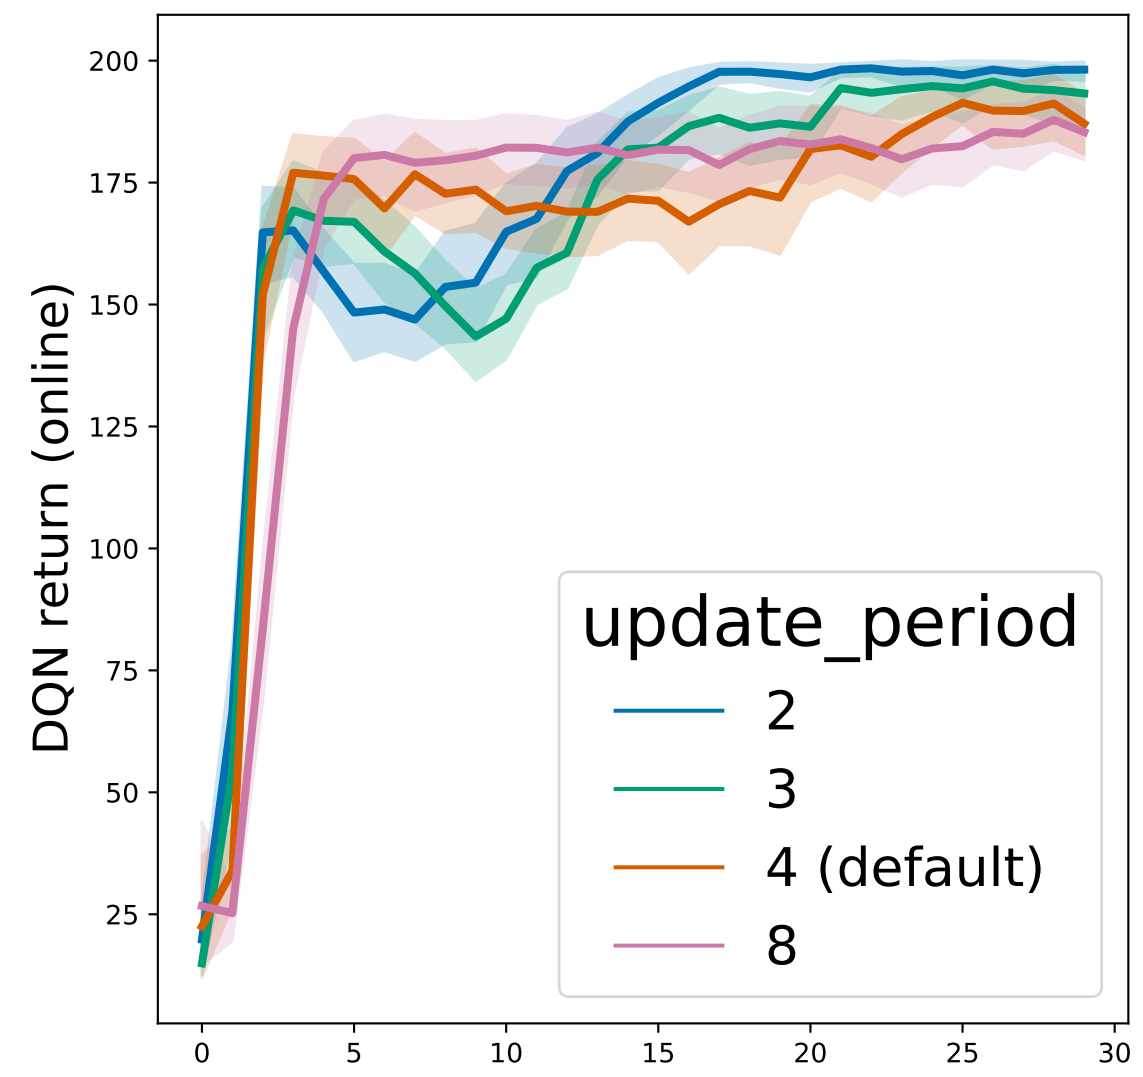

LunarLander

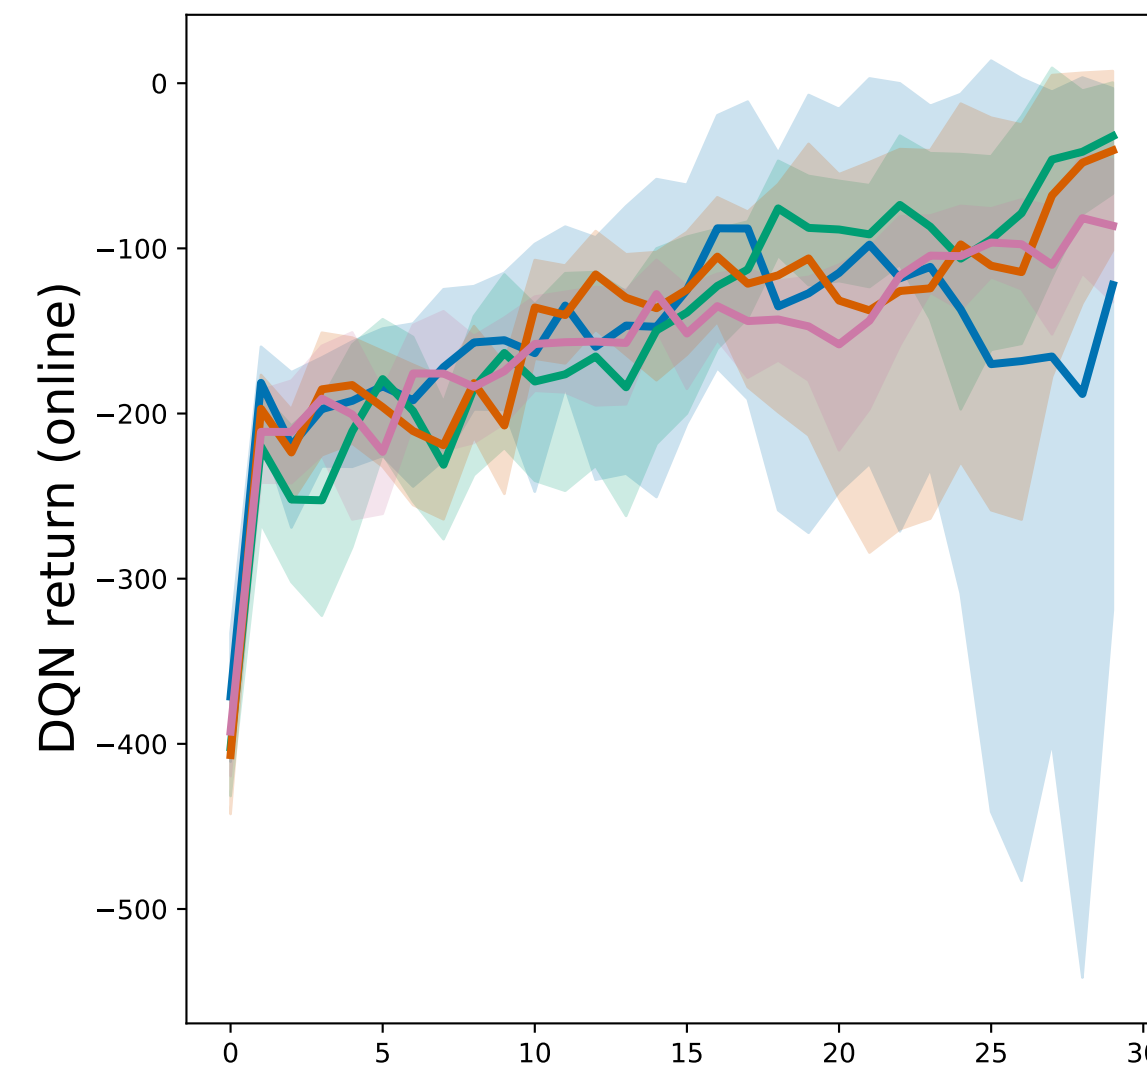

MountainCar

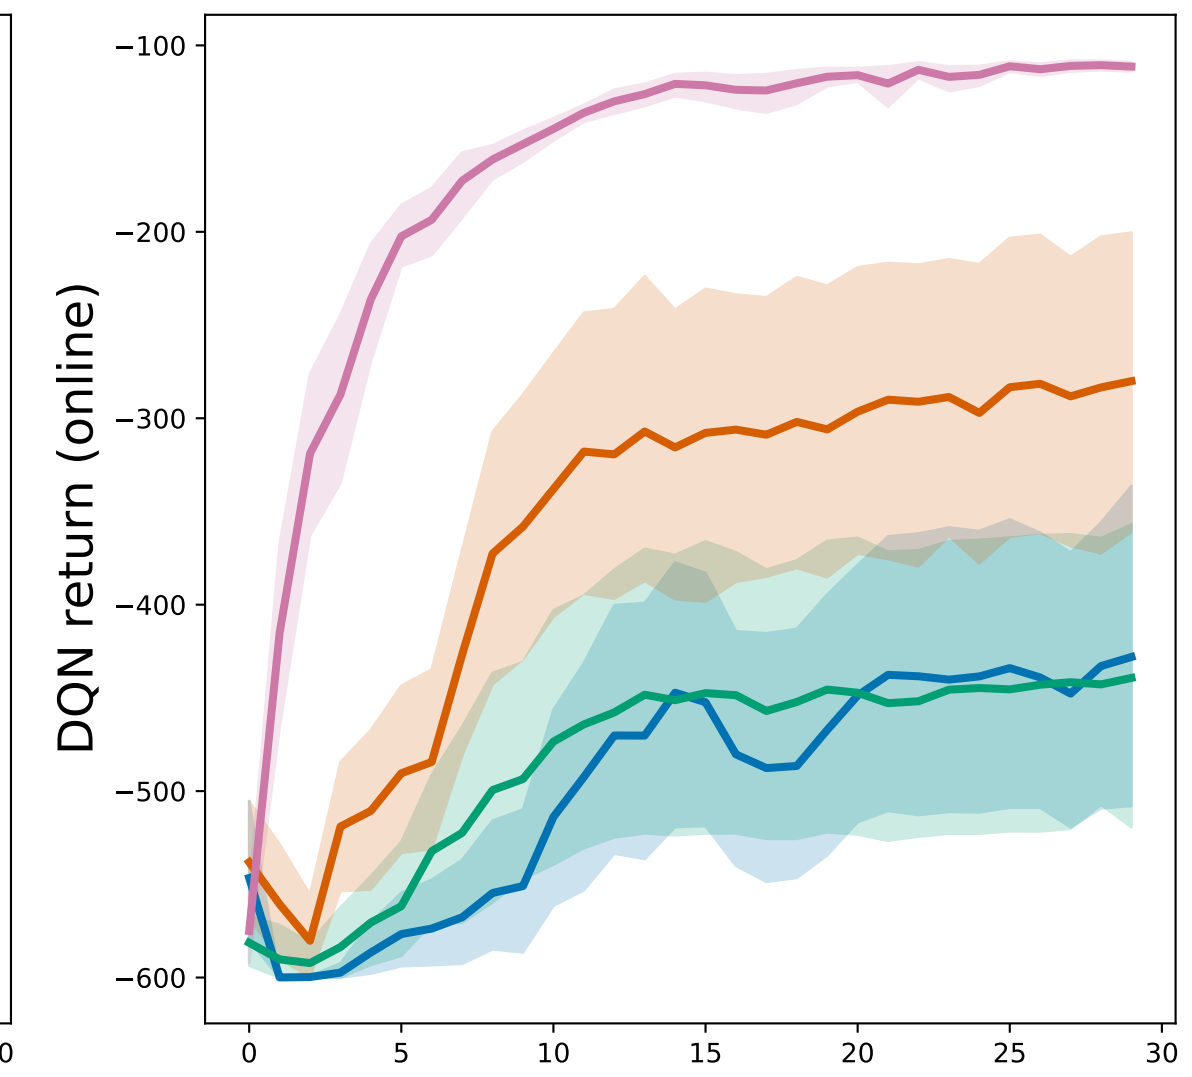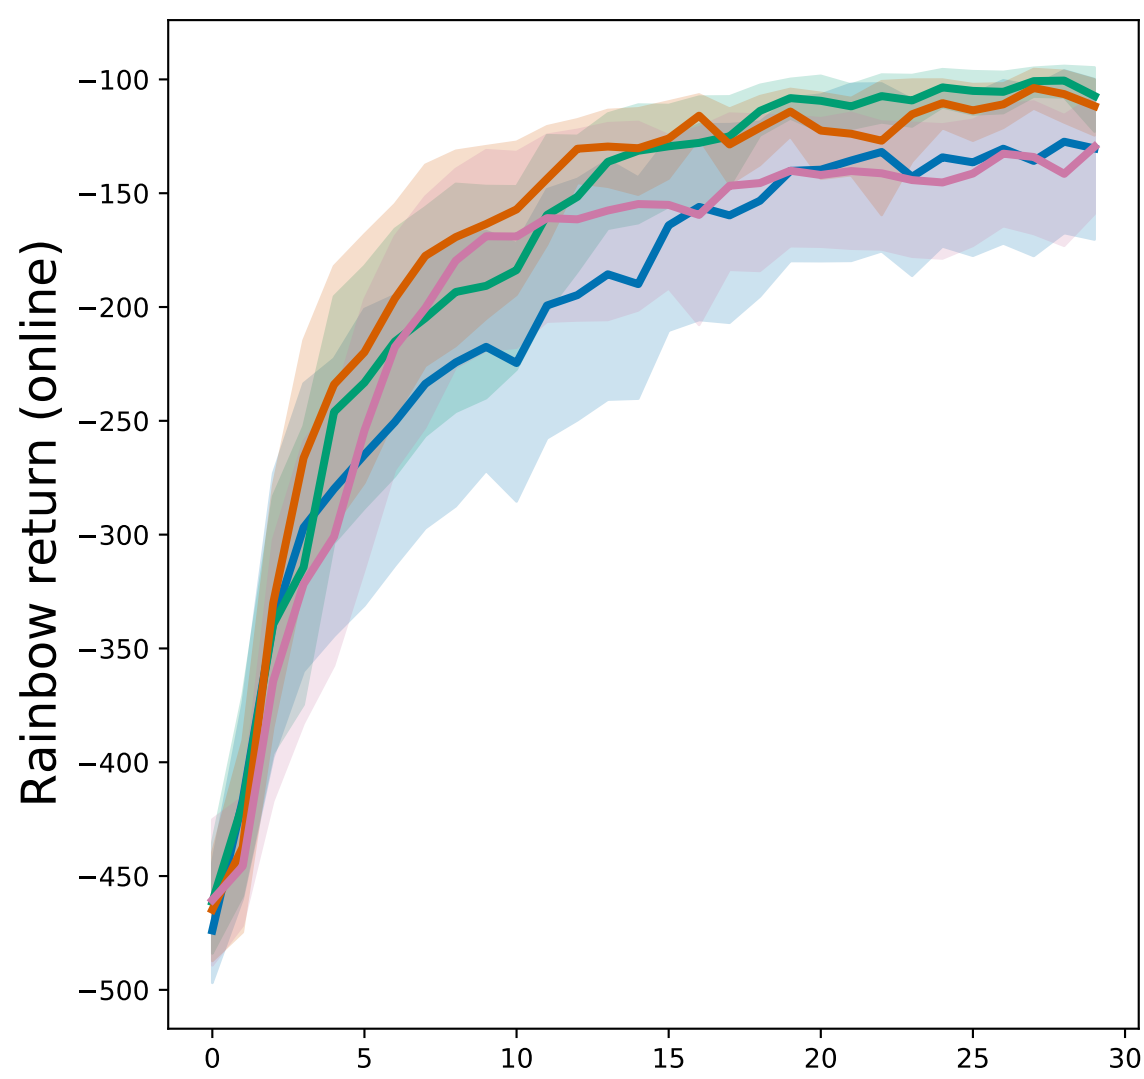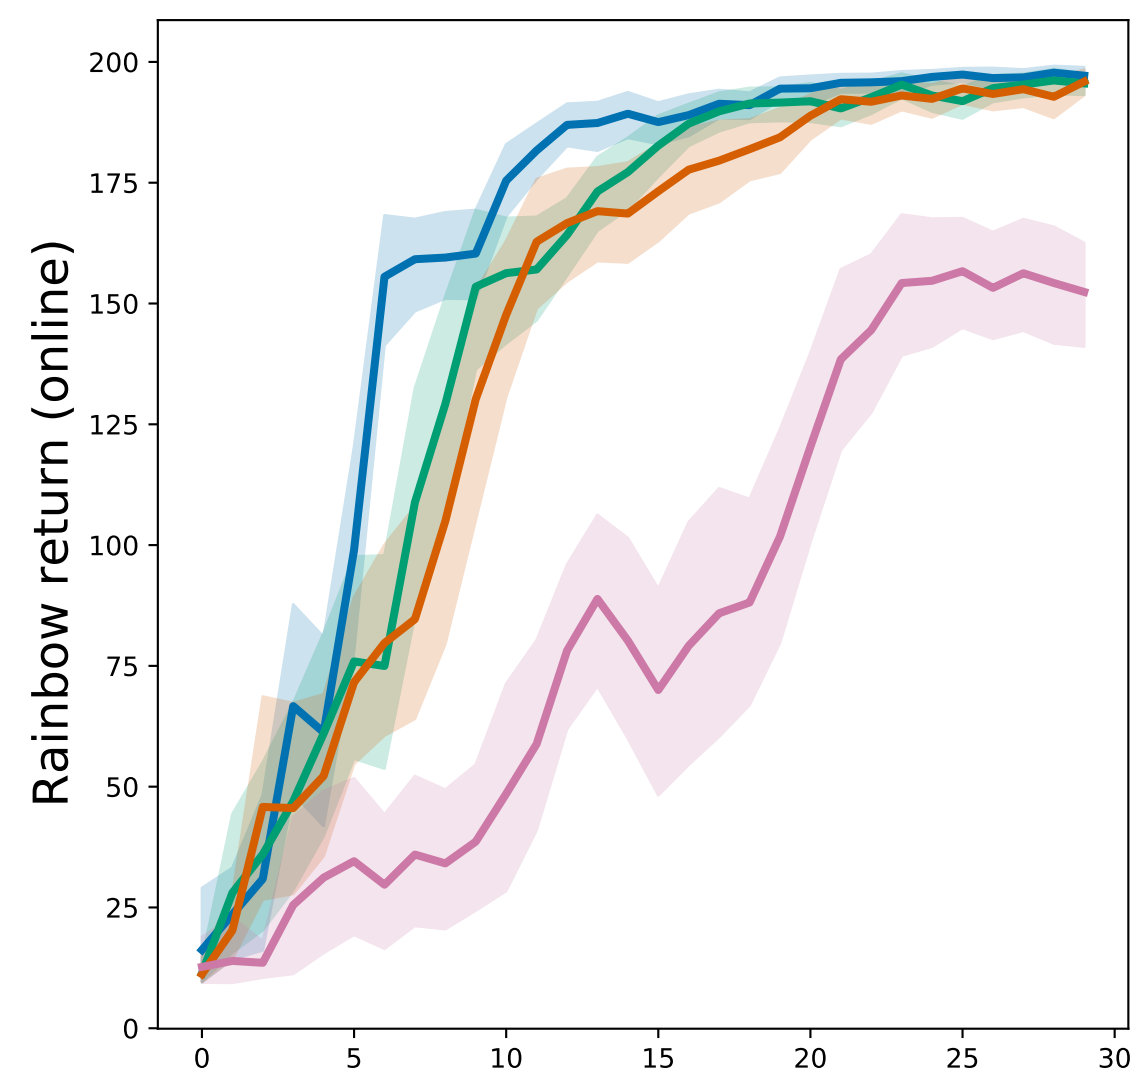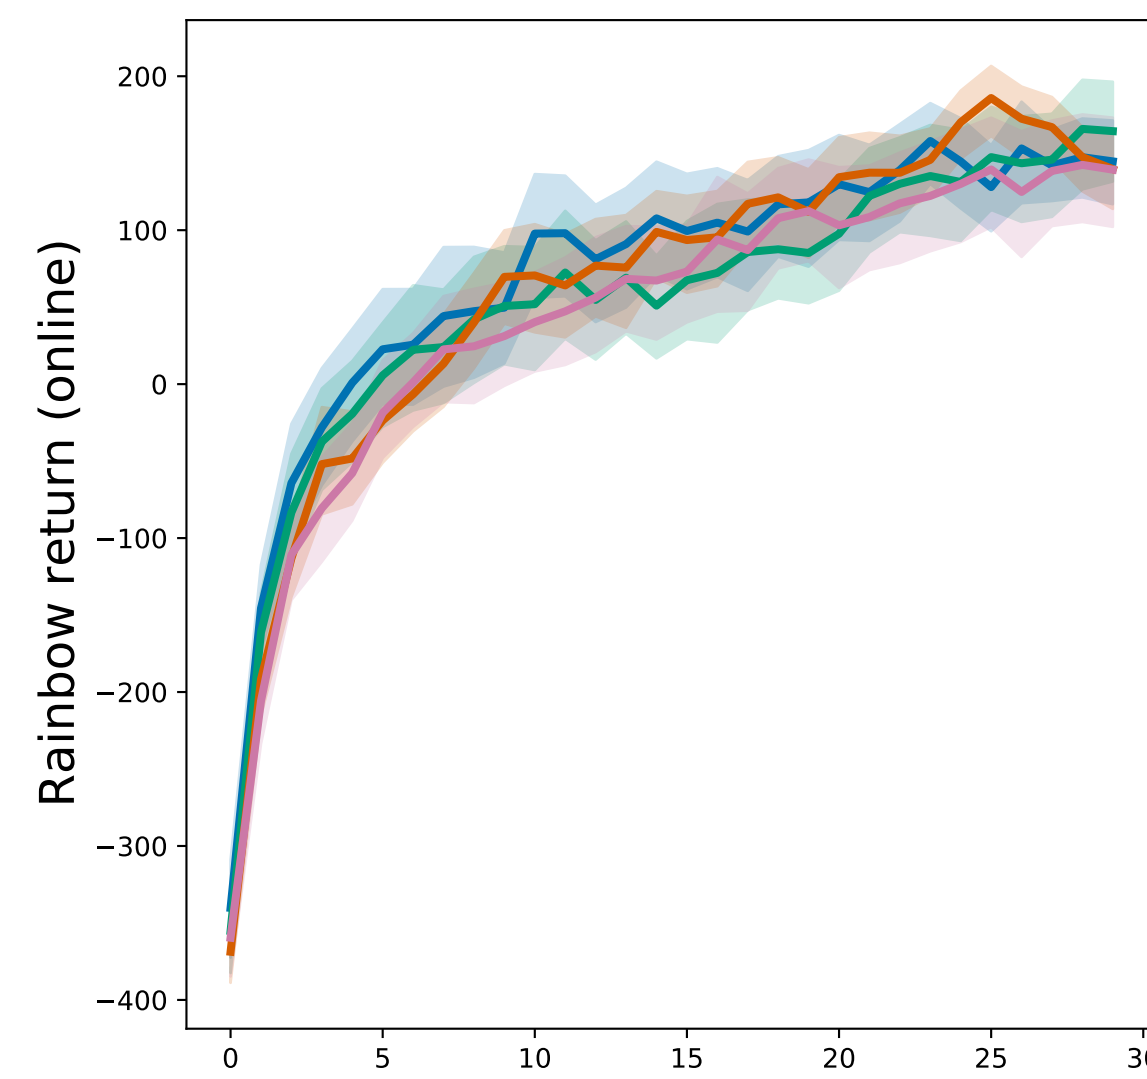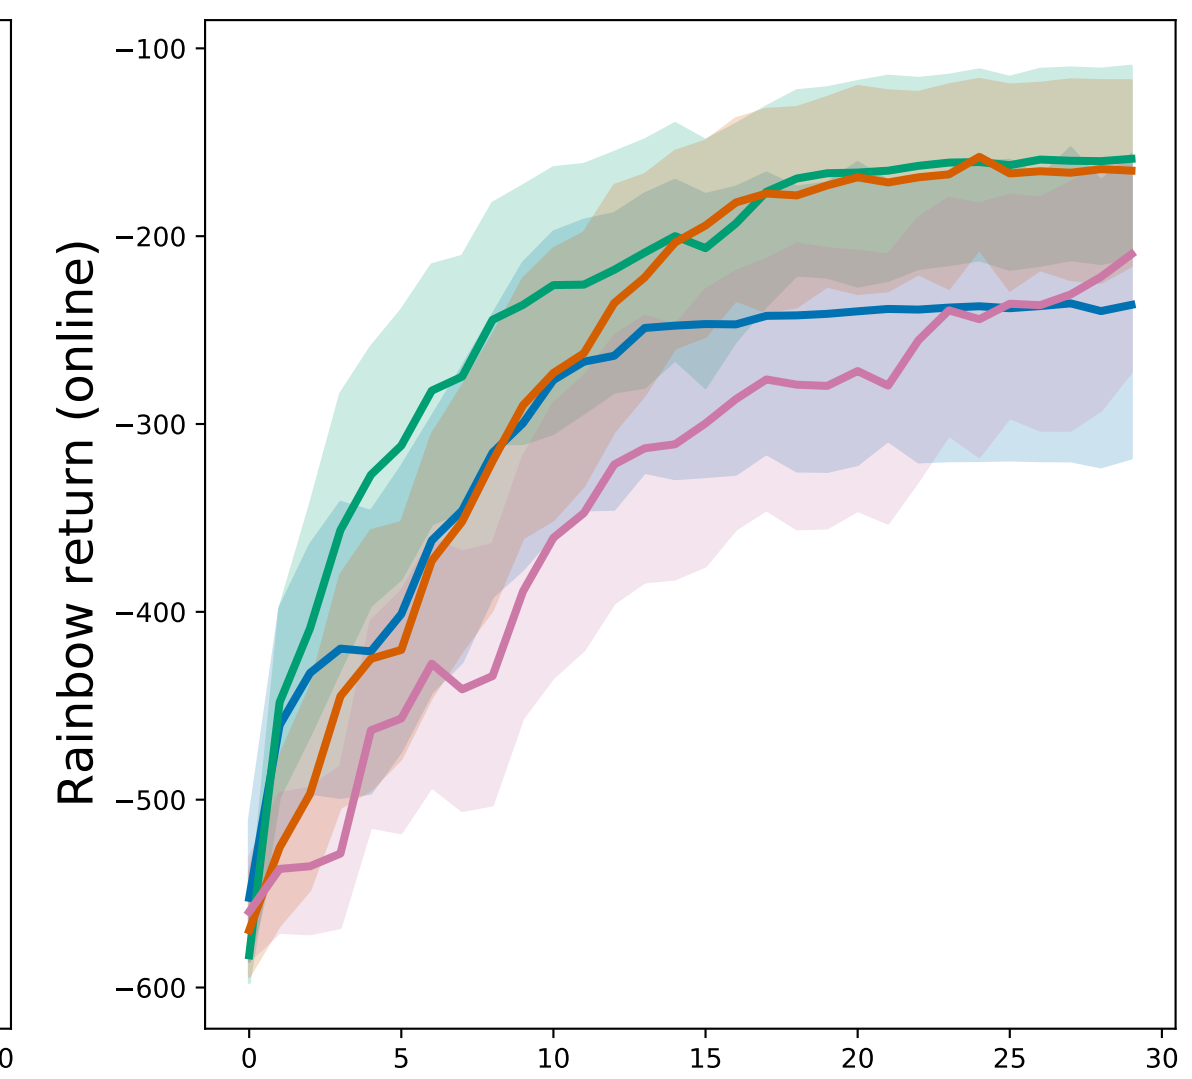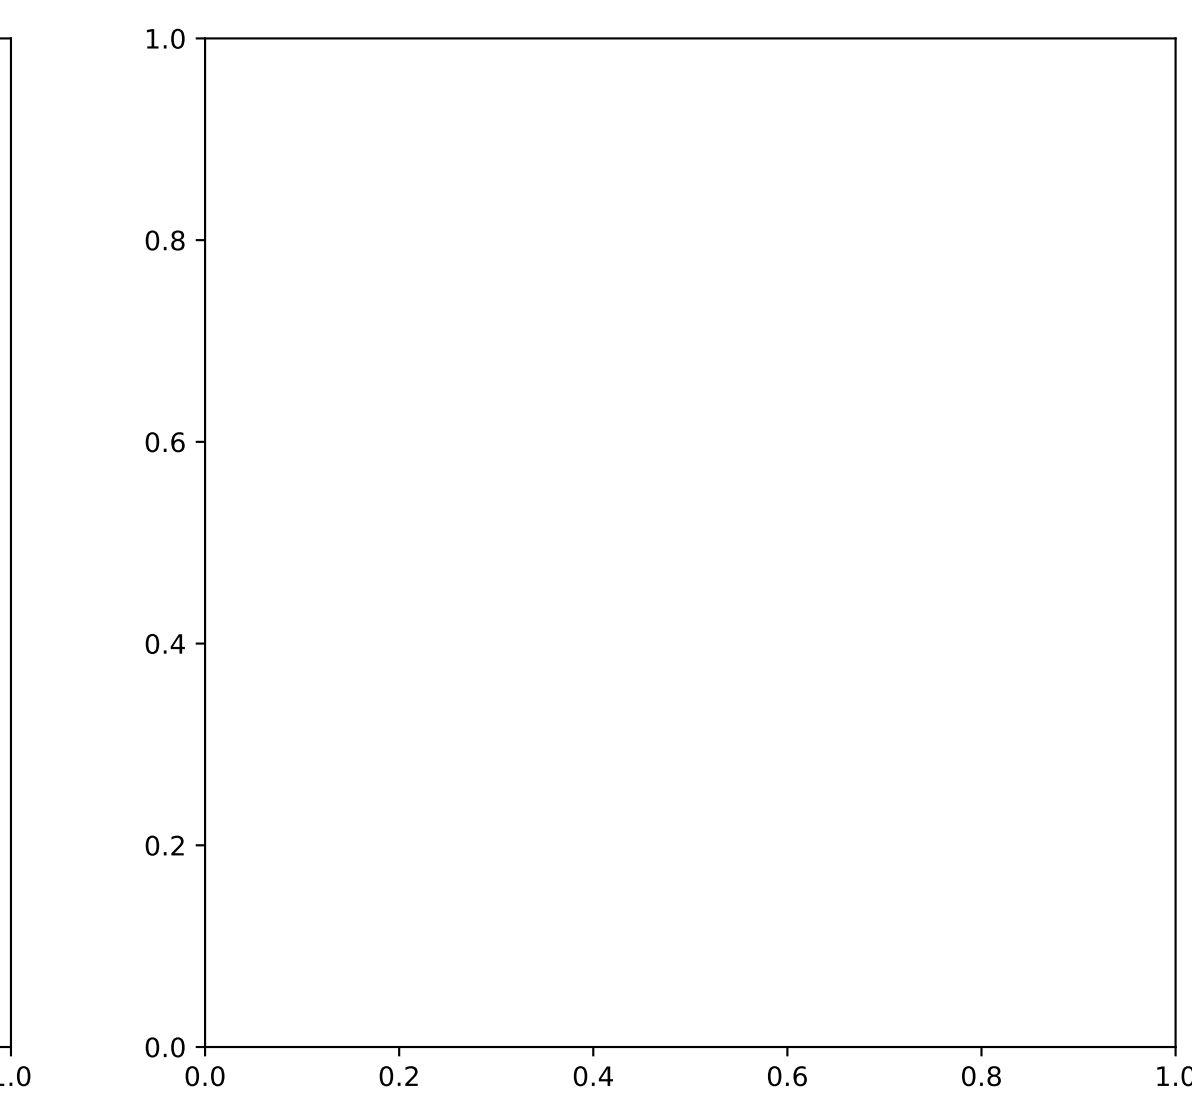

Supplement: supplementary_material [file attachment]

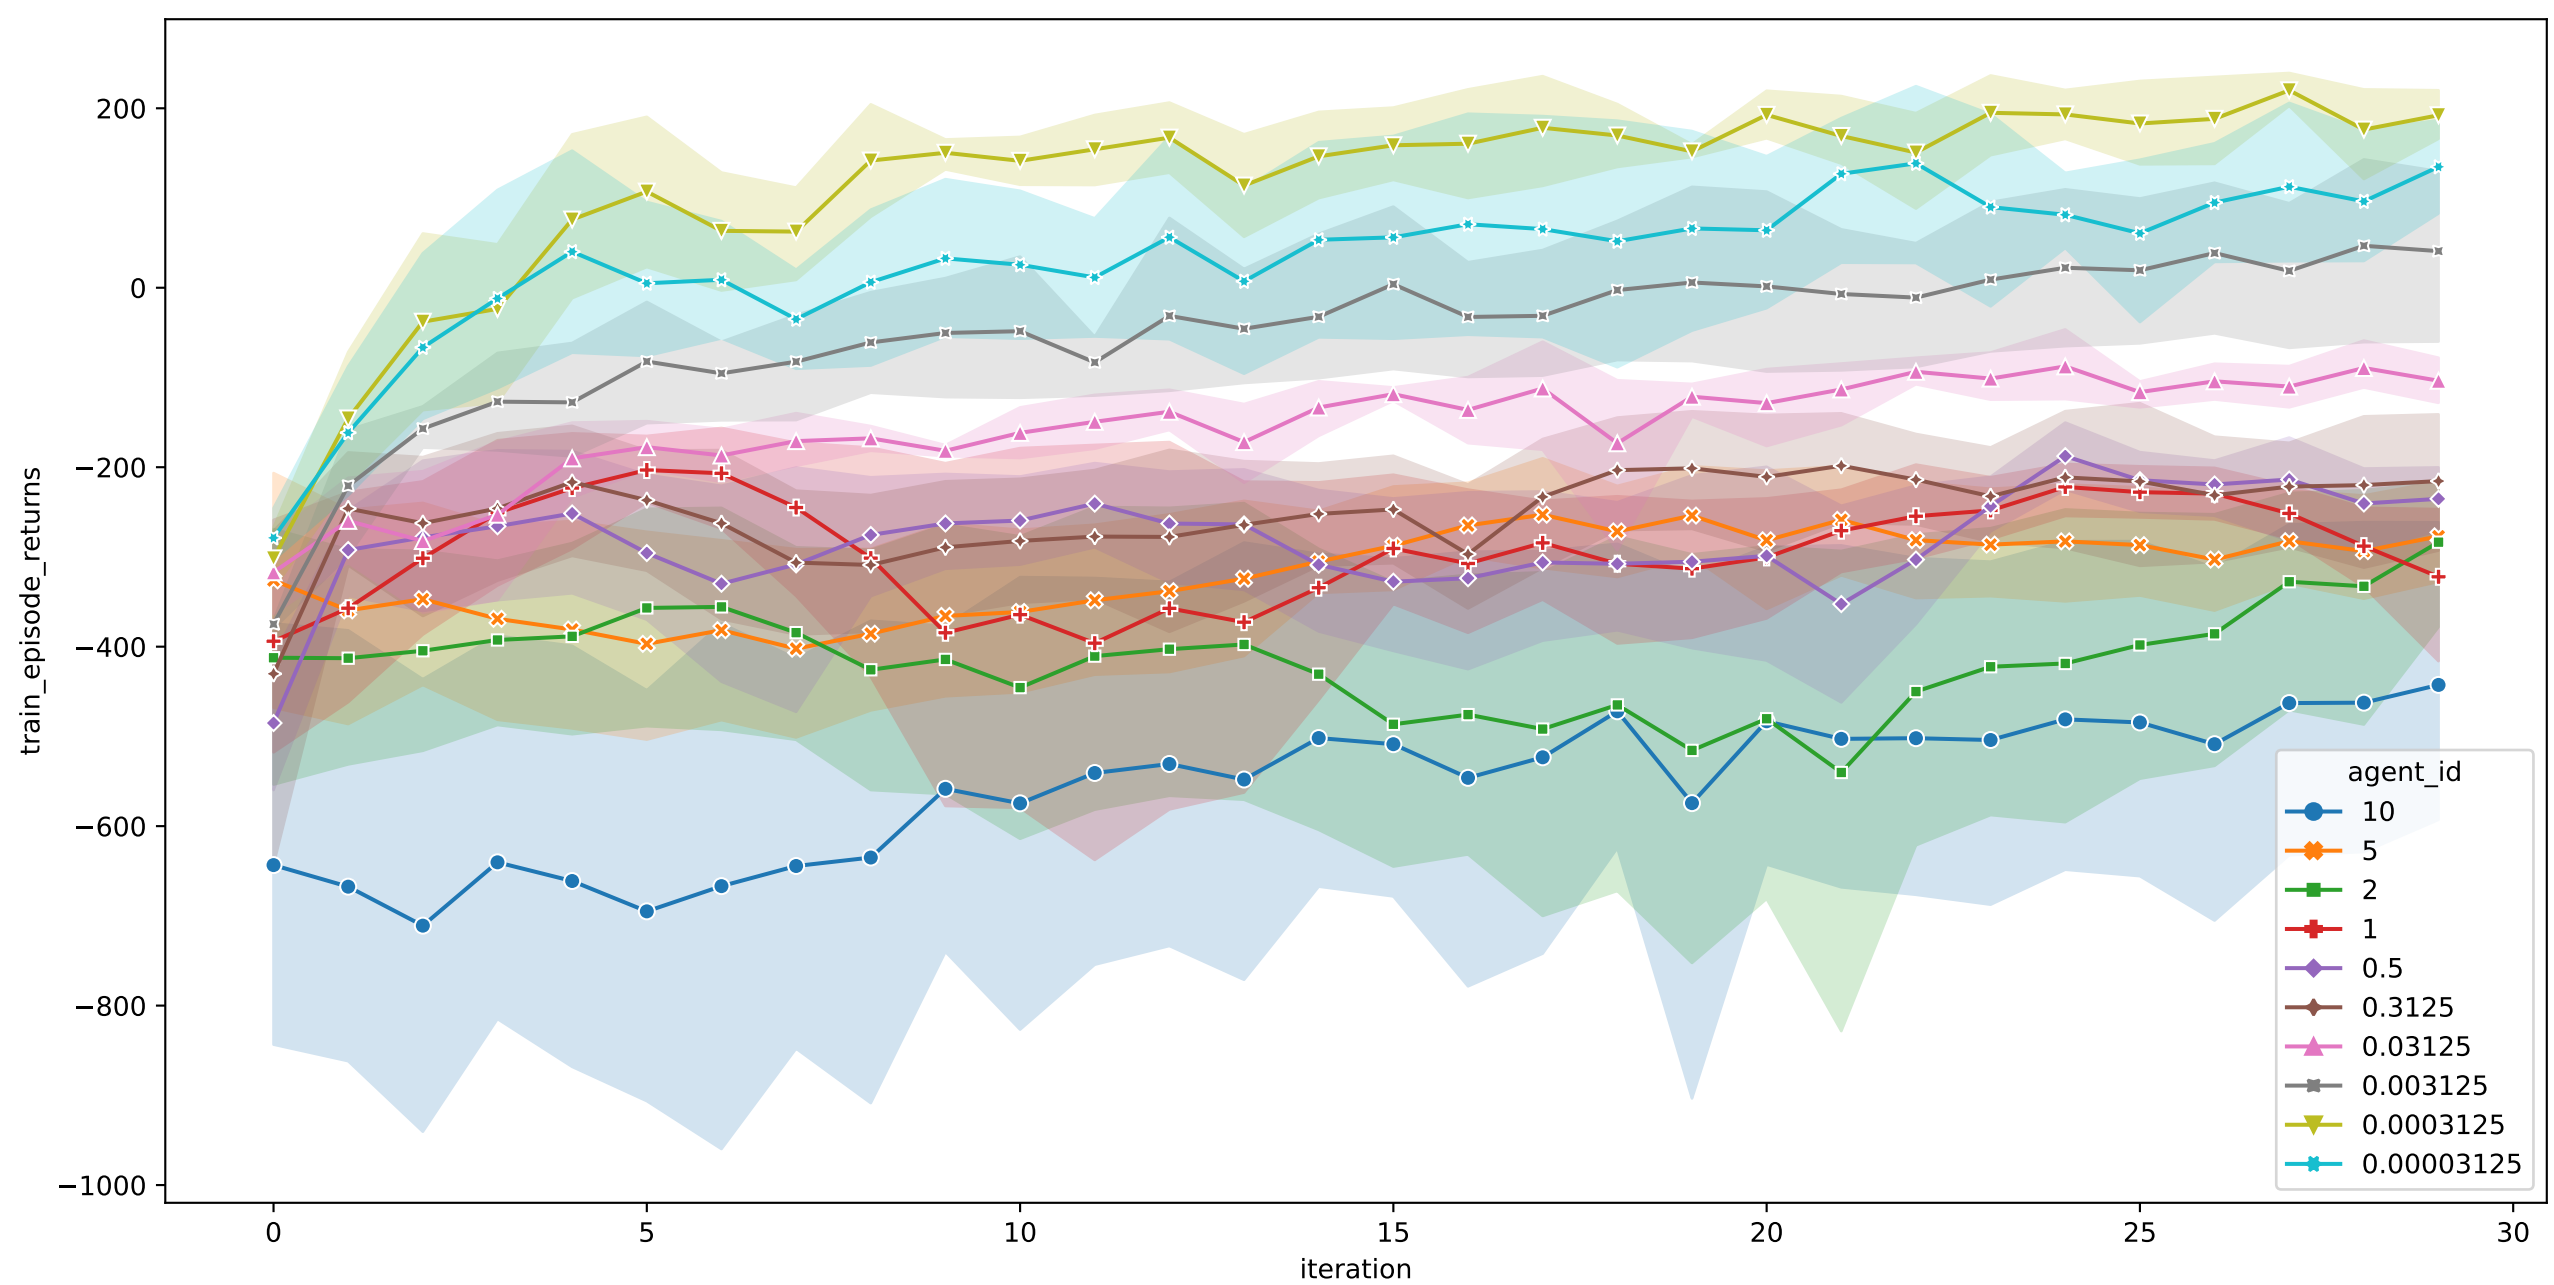

Supplement: supplementary_material [file attachment]

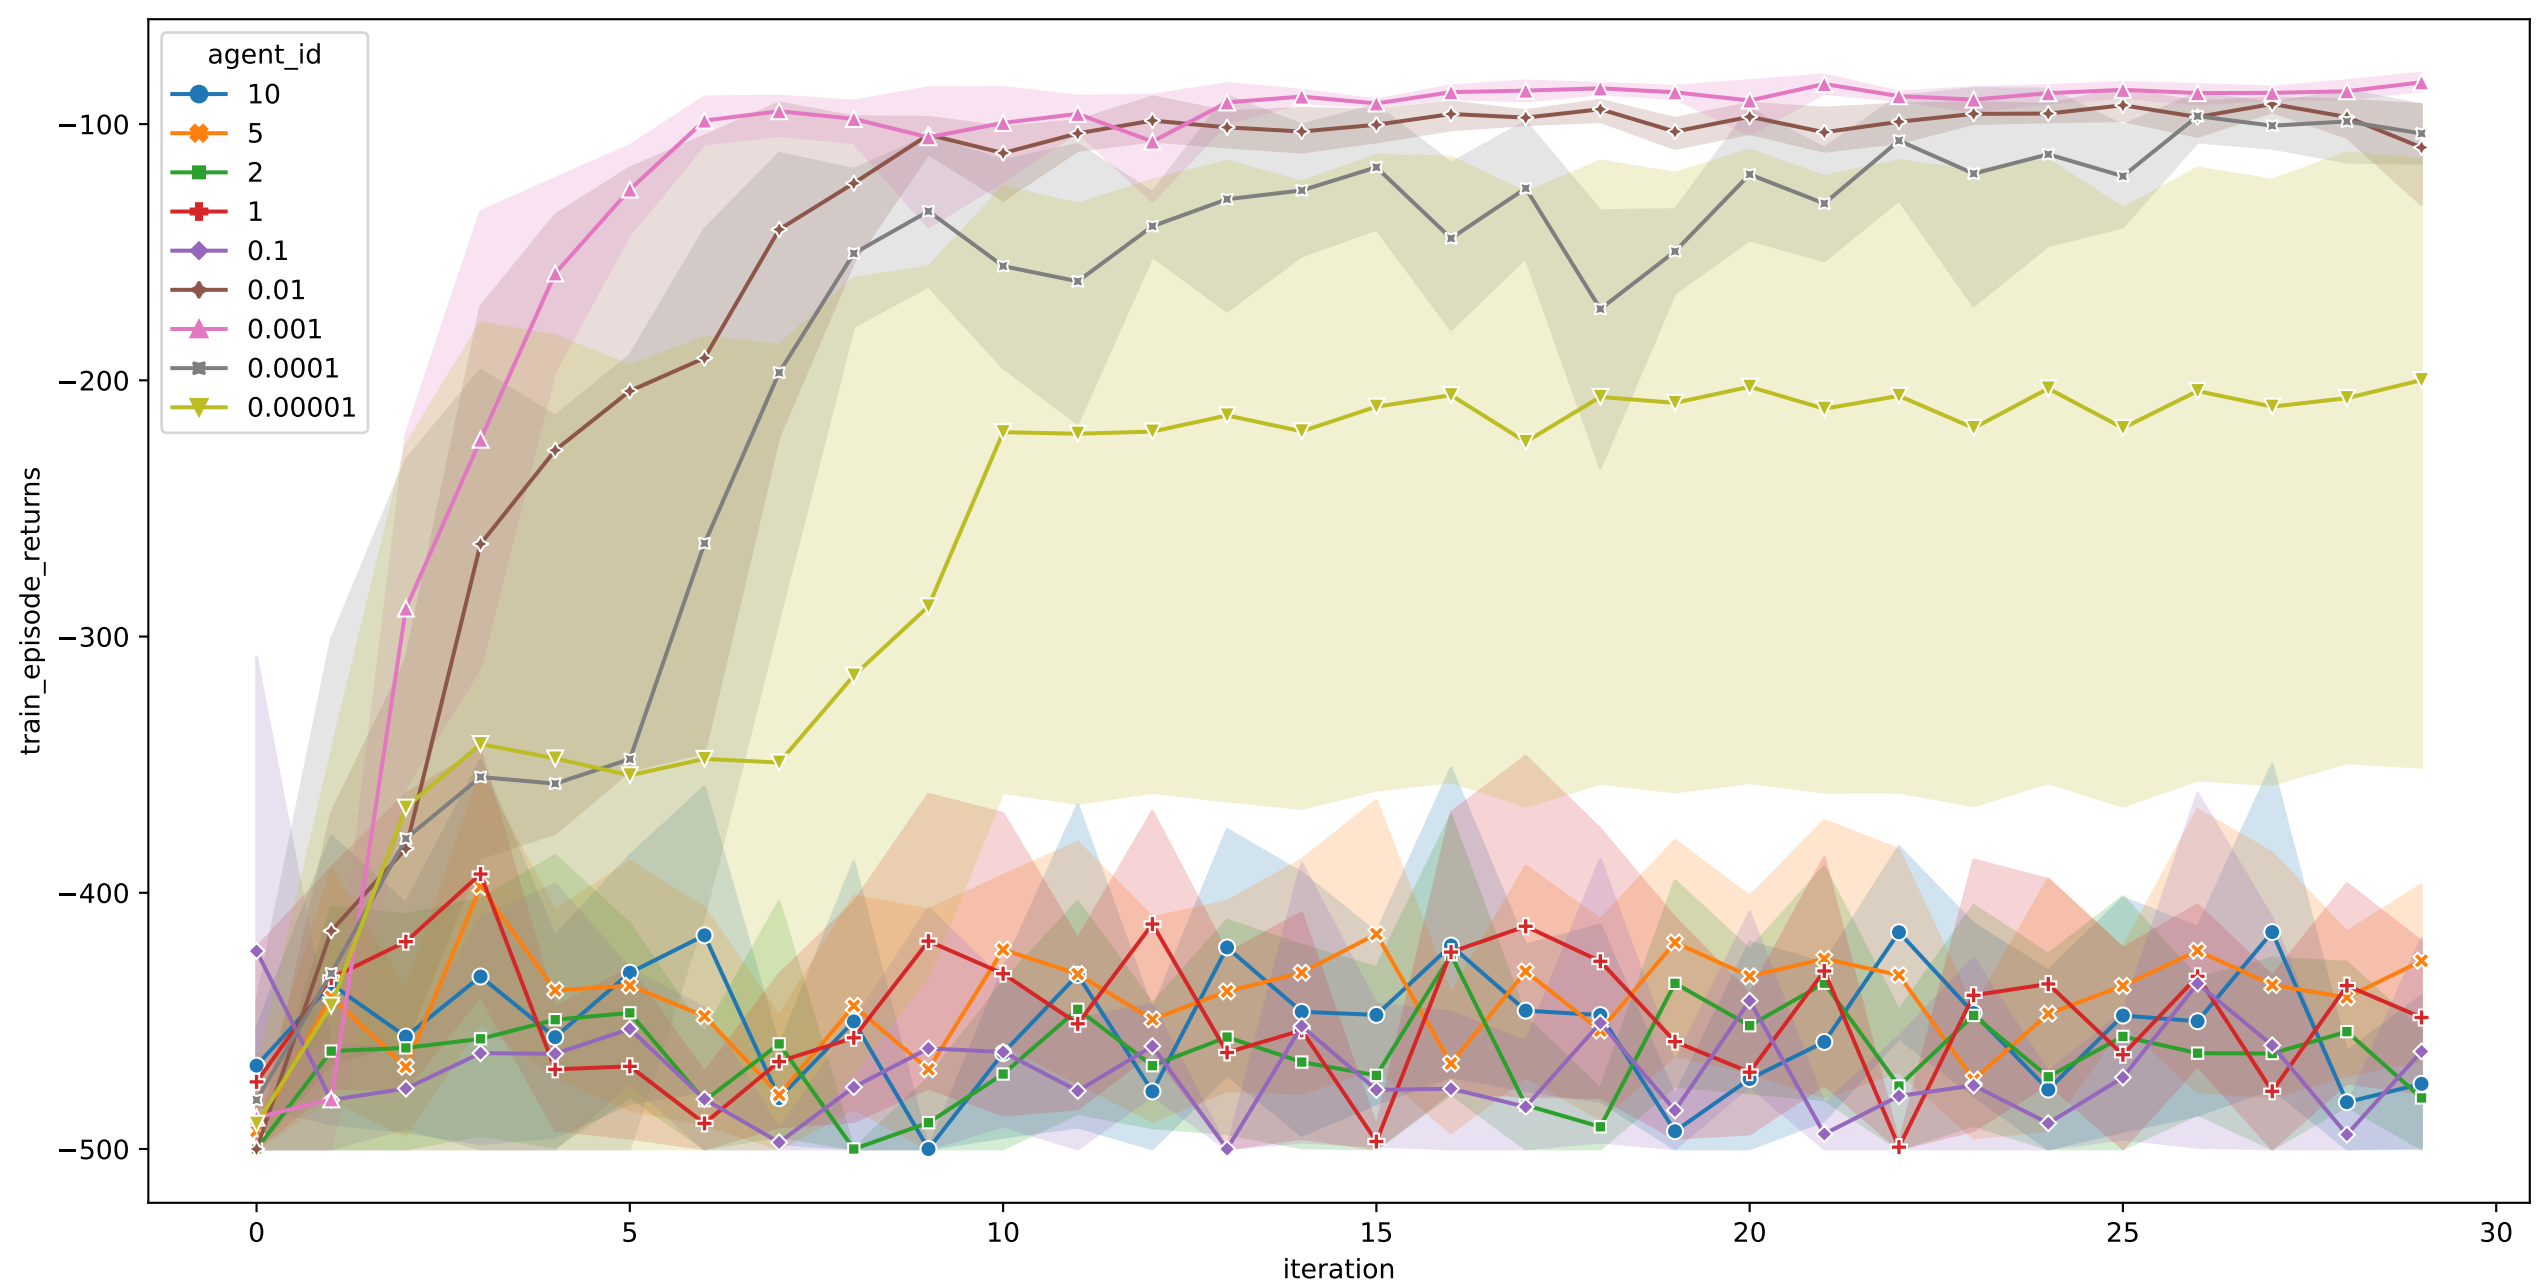

Supplement: supplementary_material [file attachment]

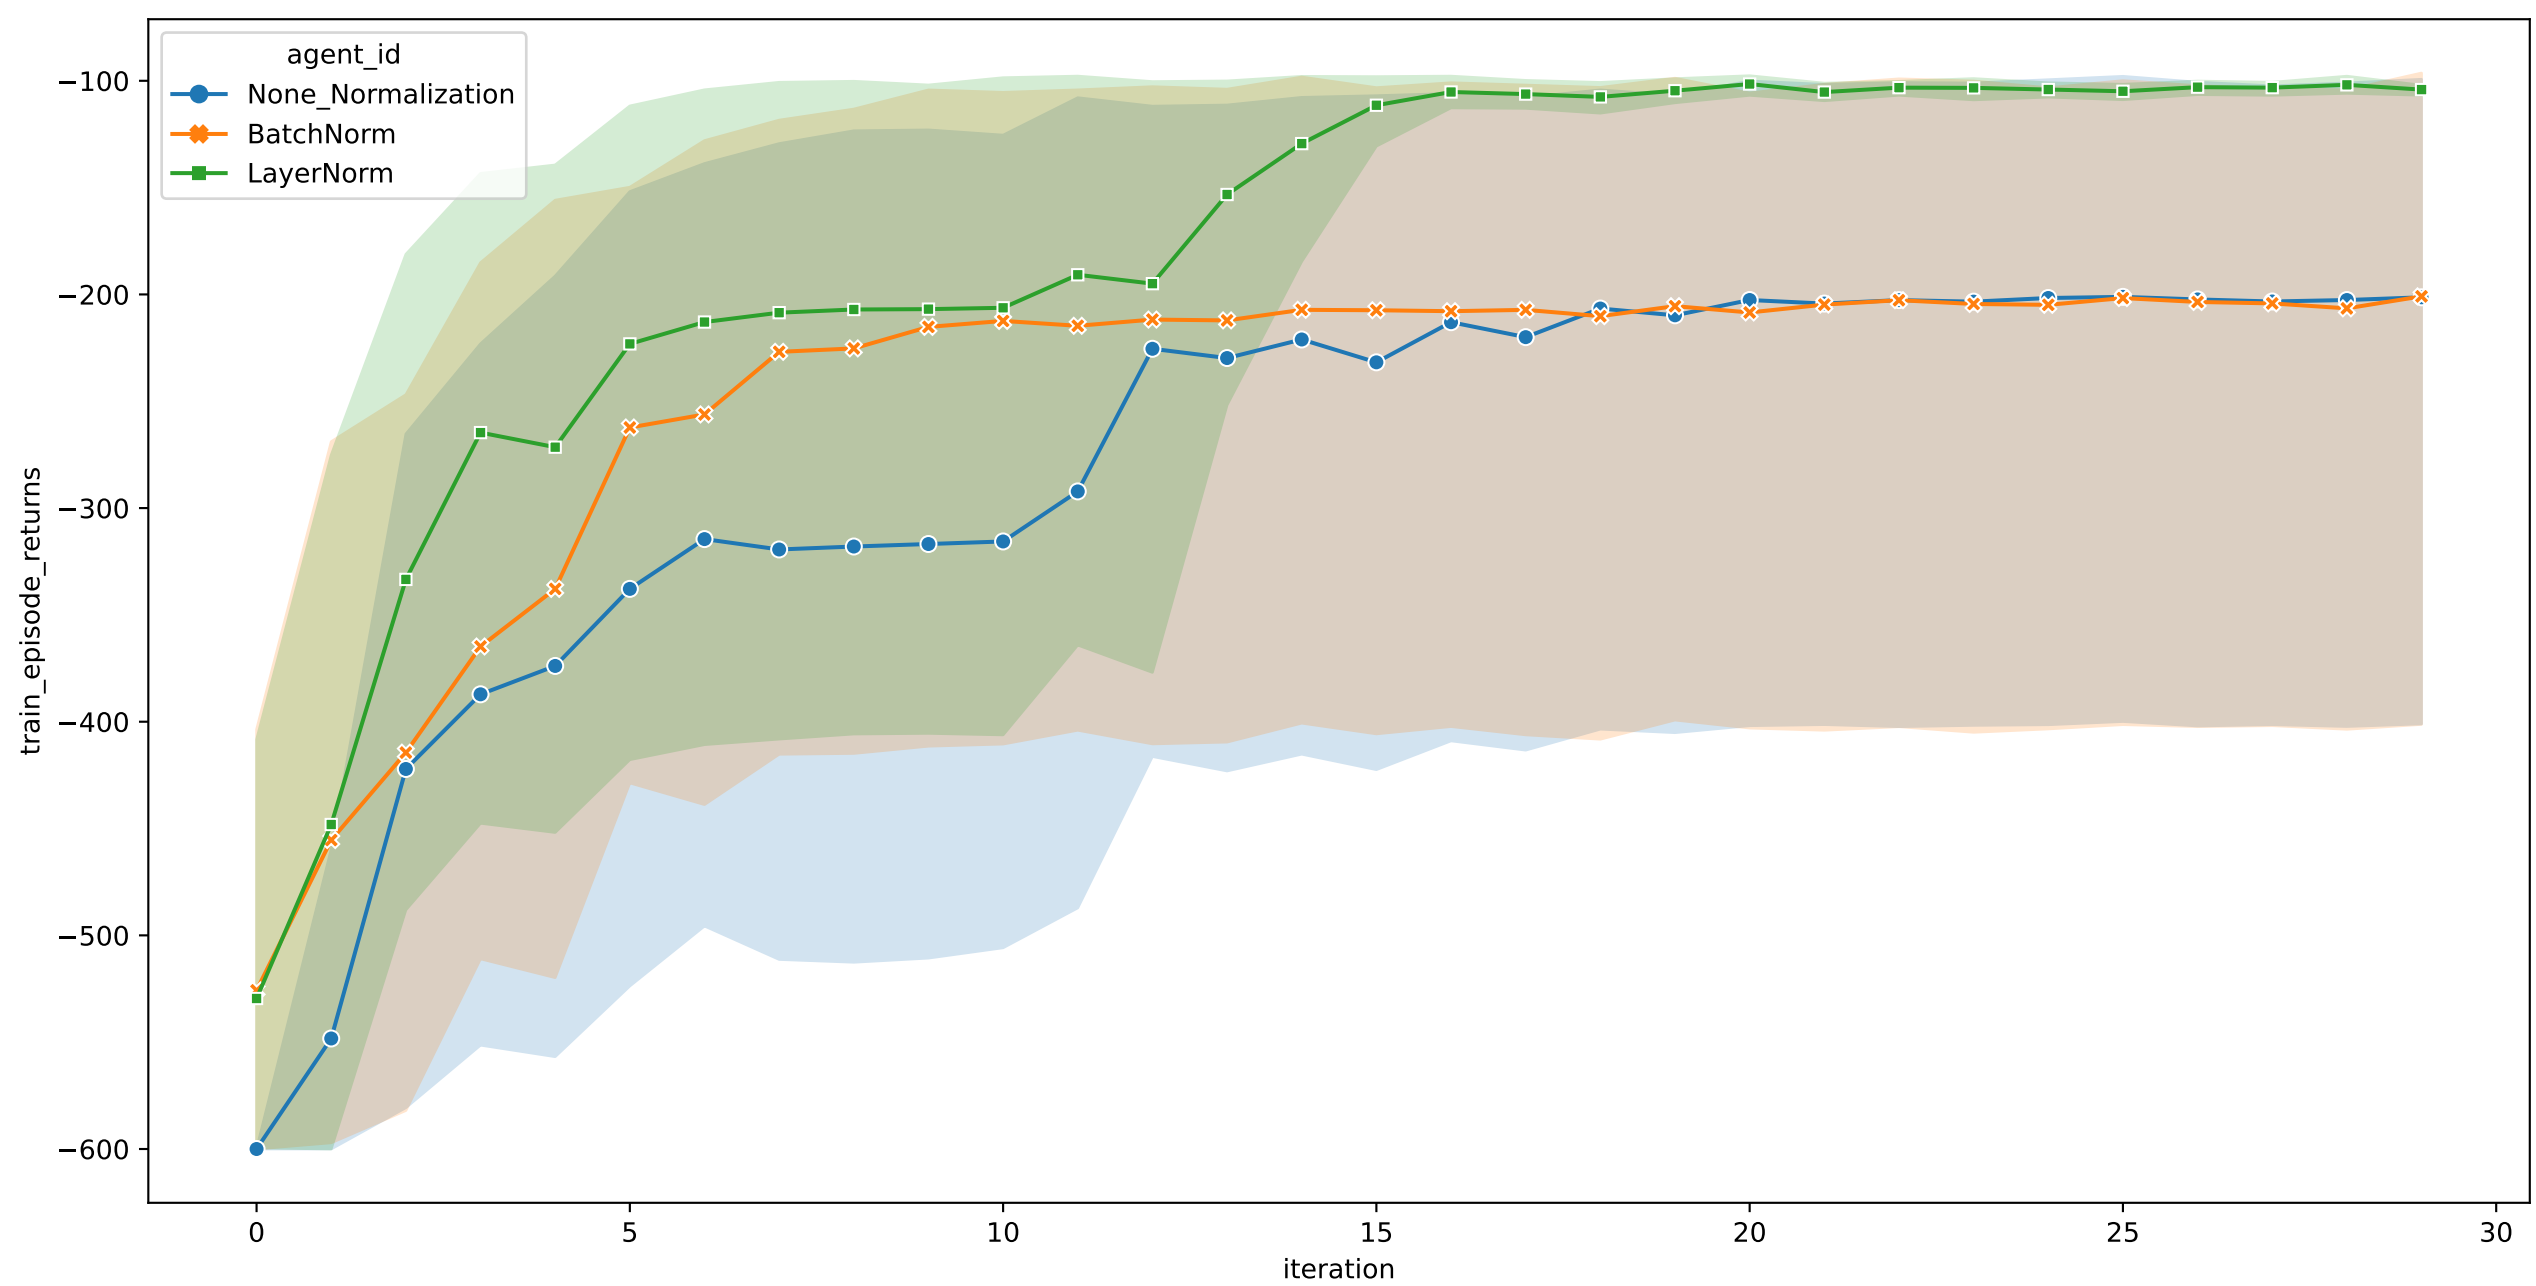

Supplement: supplementary_material [file attachment]

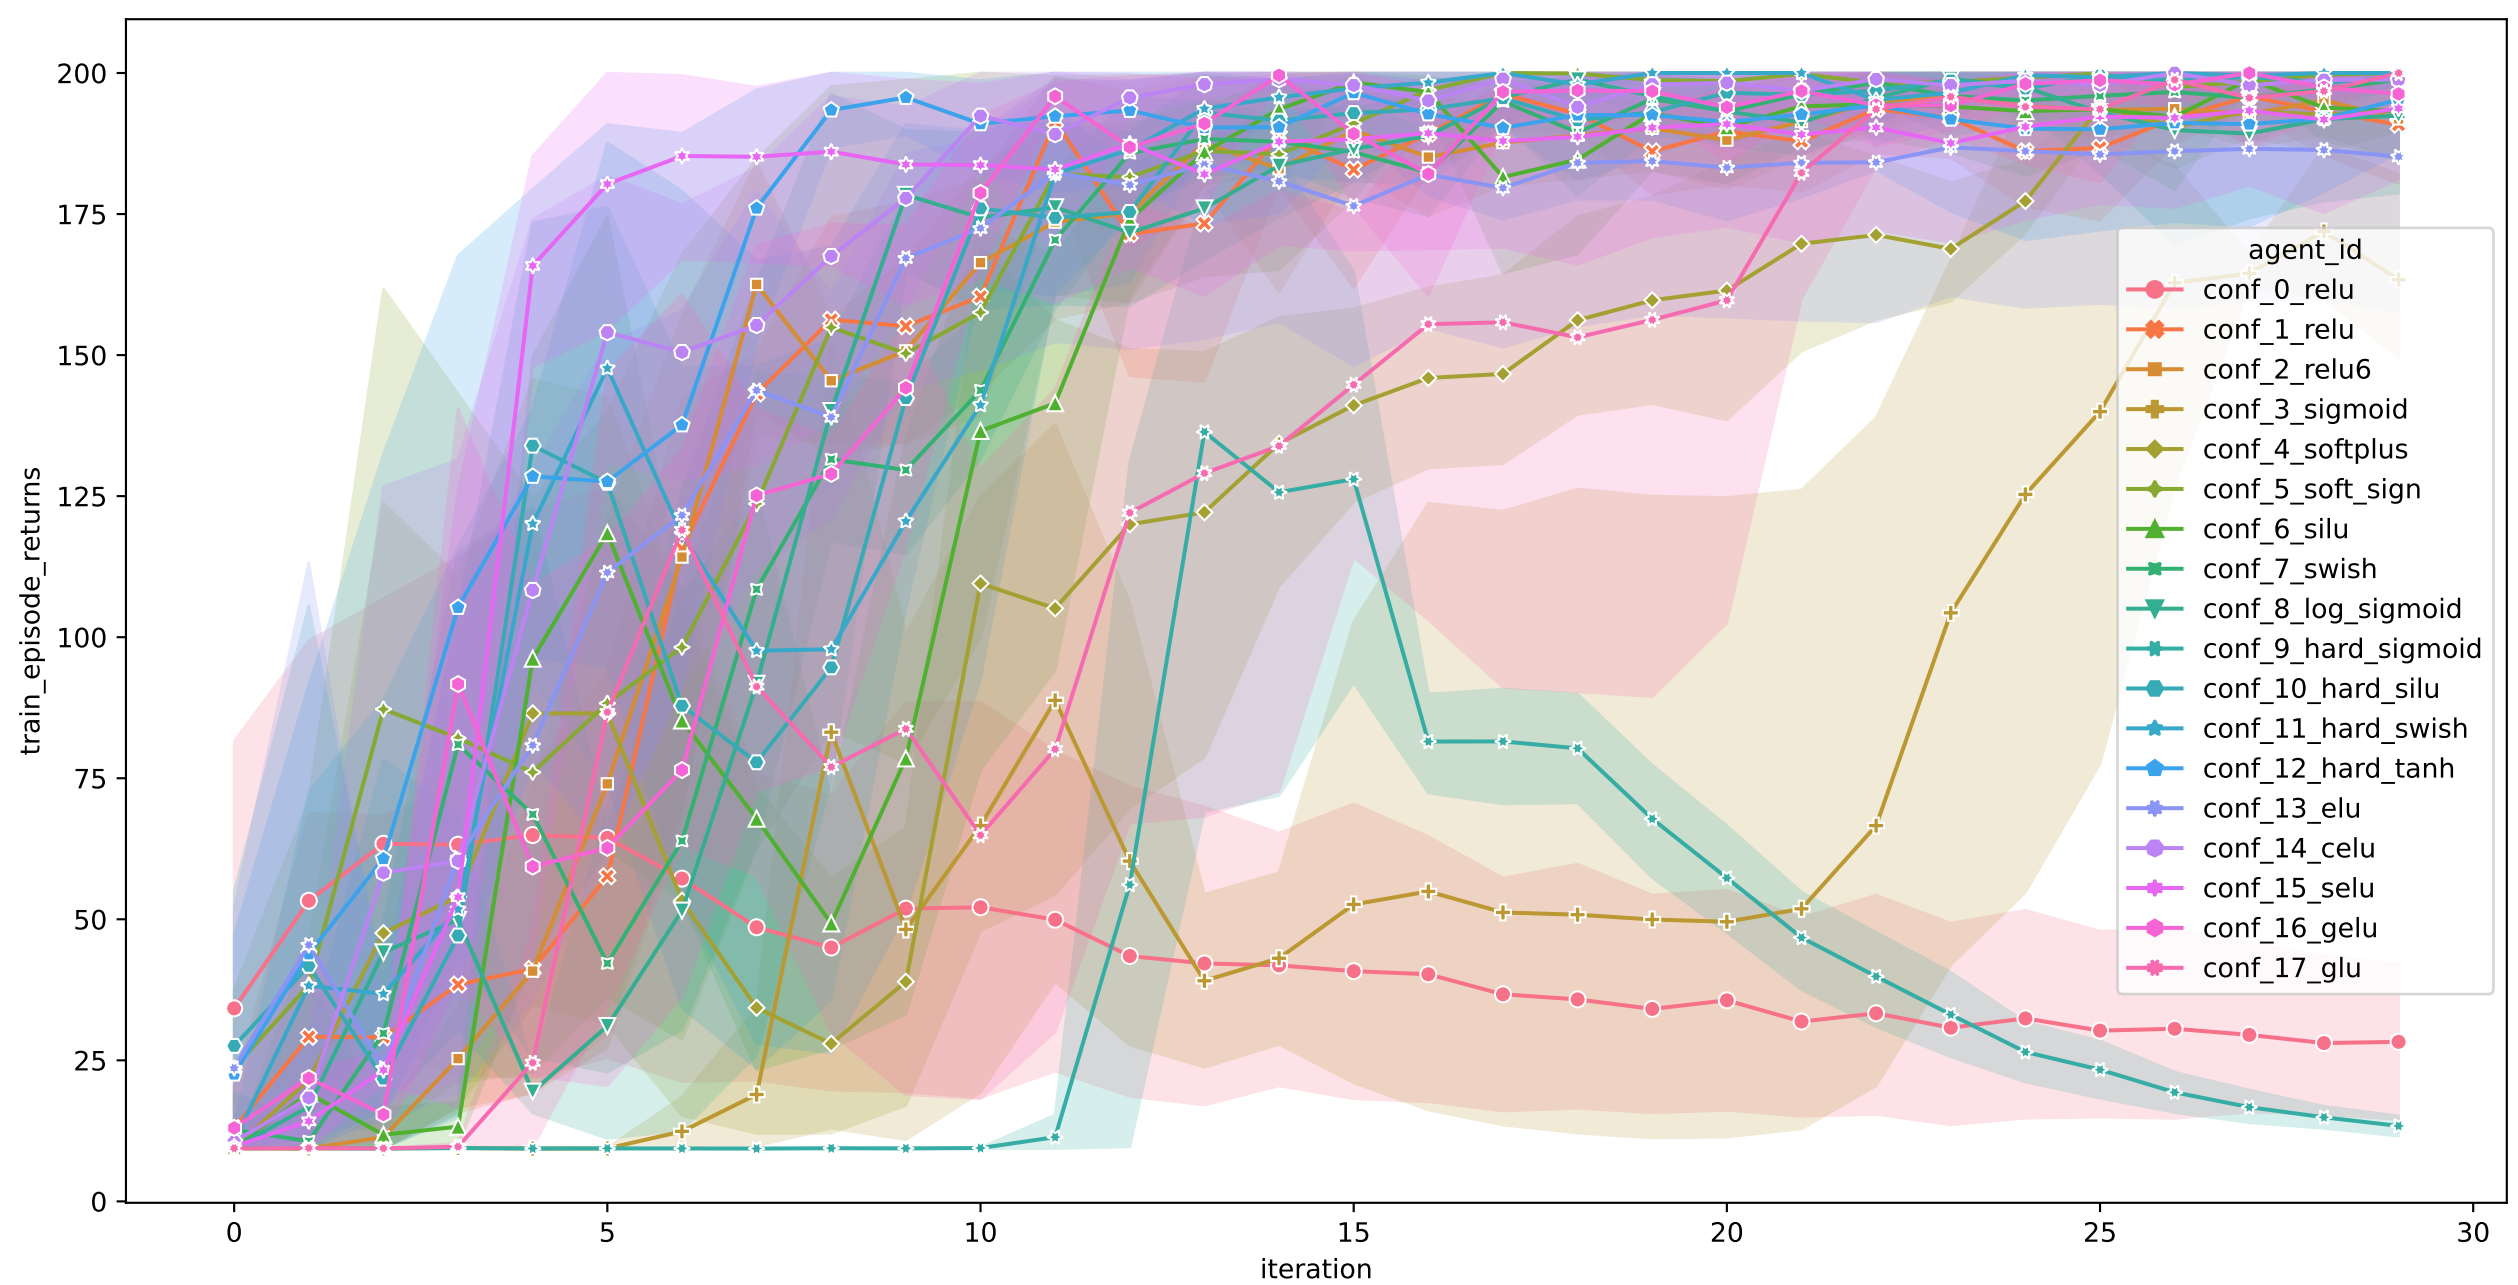

Supplement: supplementary_material [file attachment]

Acrobot

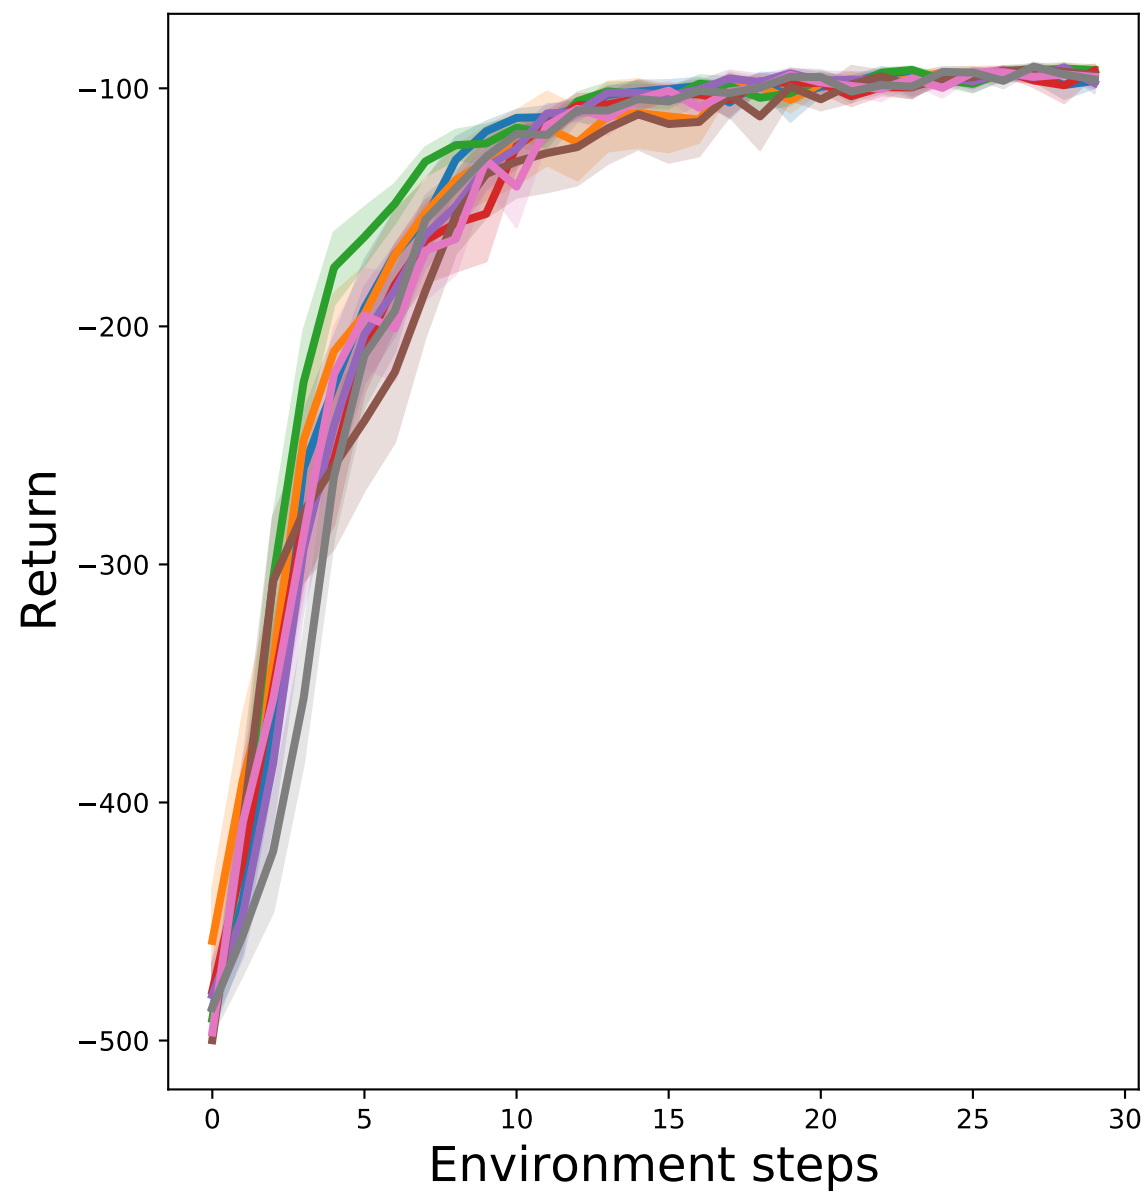

CartPole

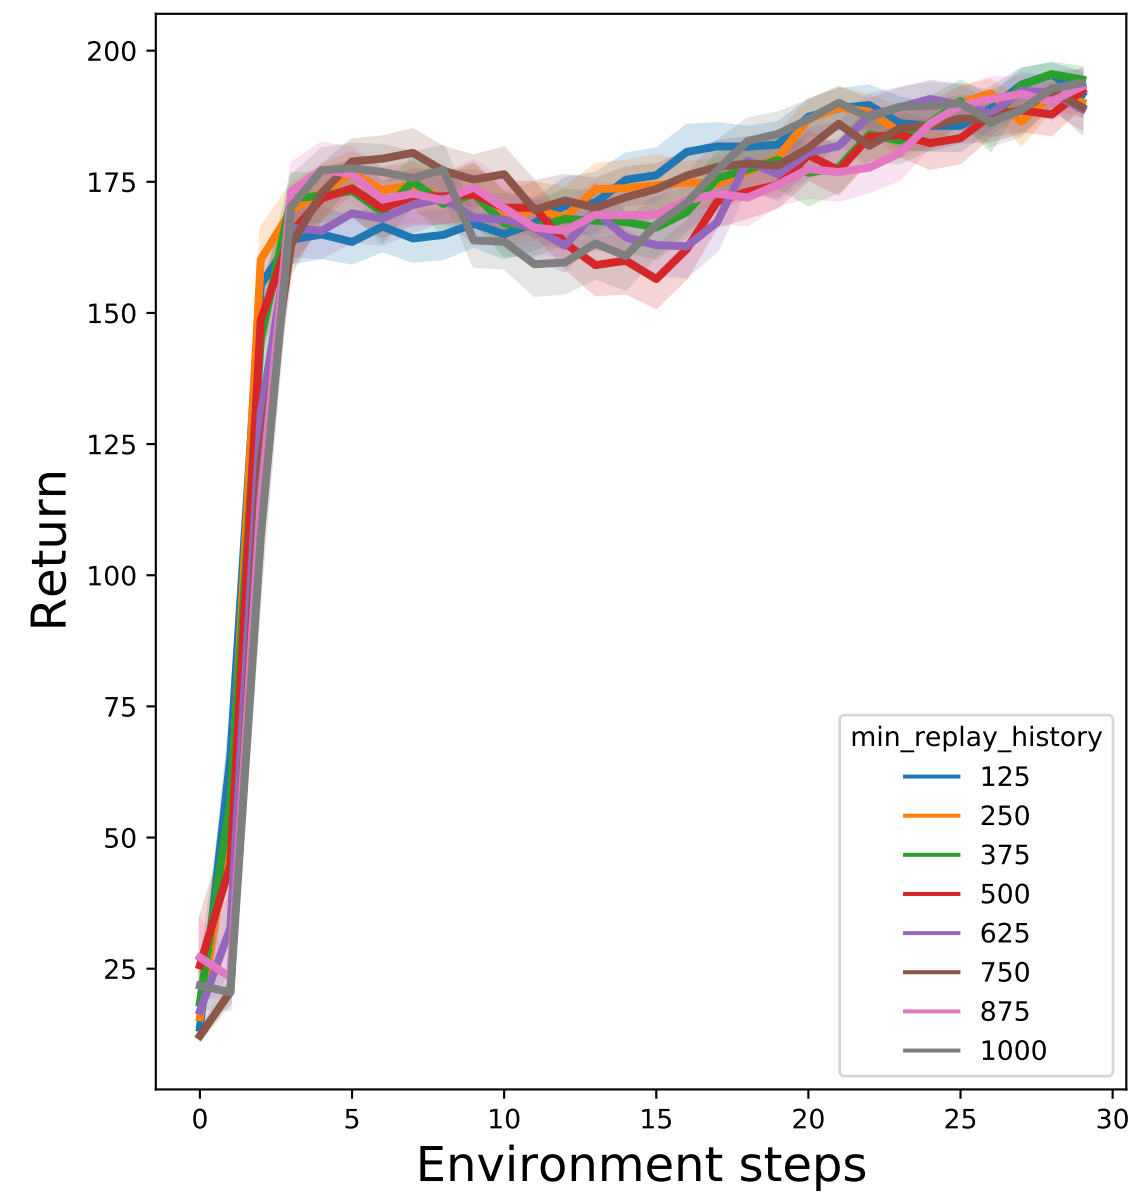

LunarLander

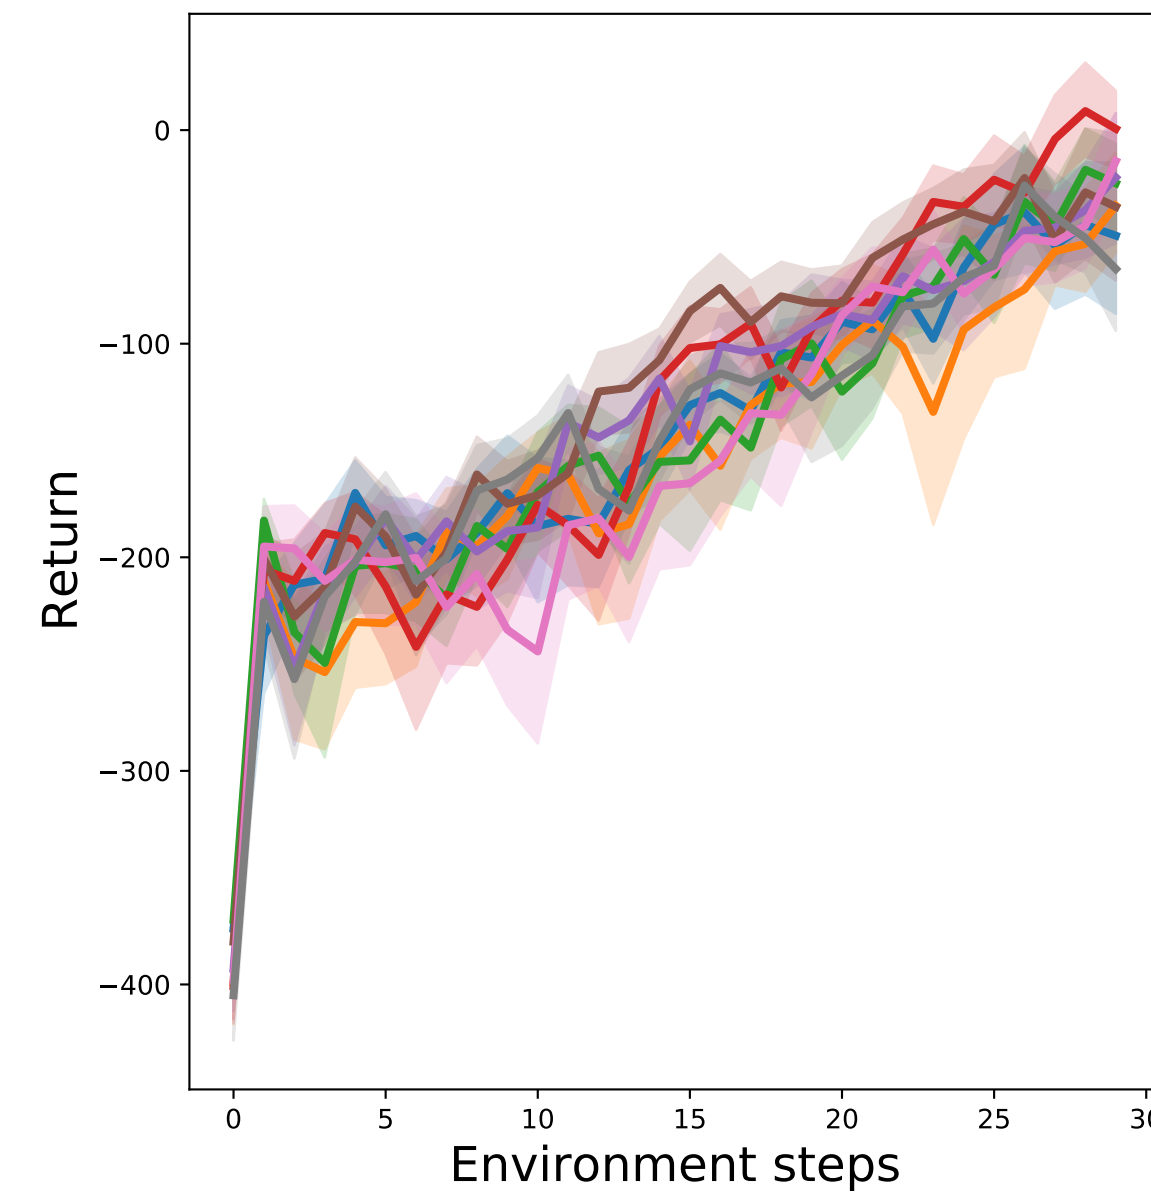

MountainCar

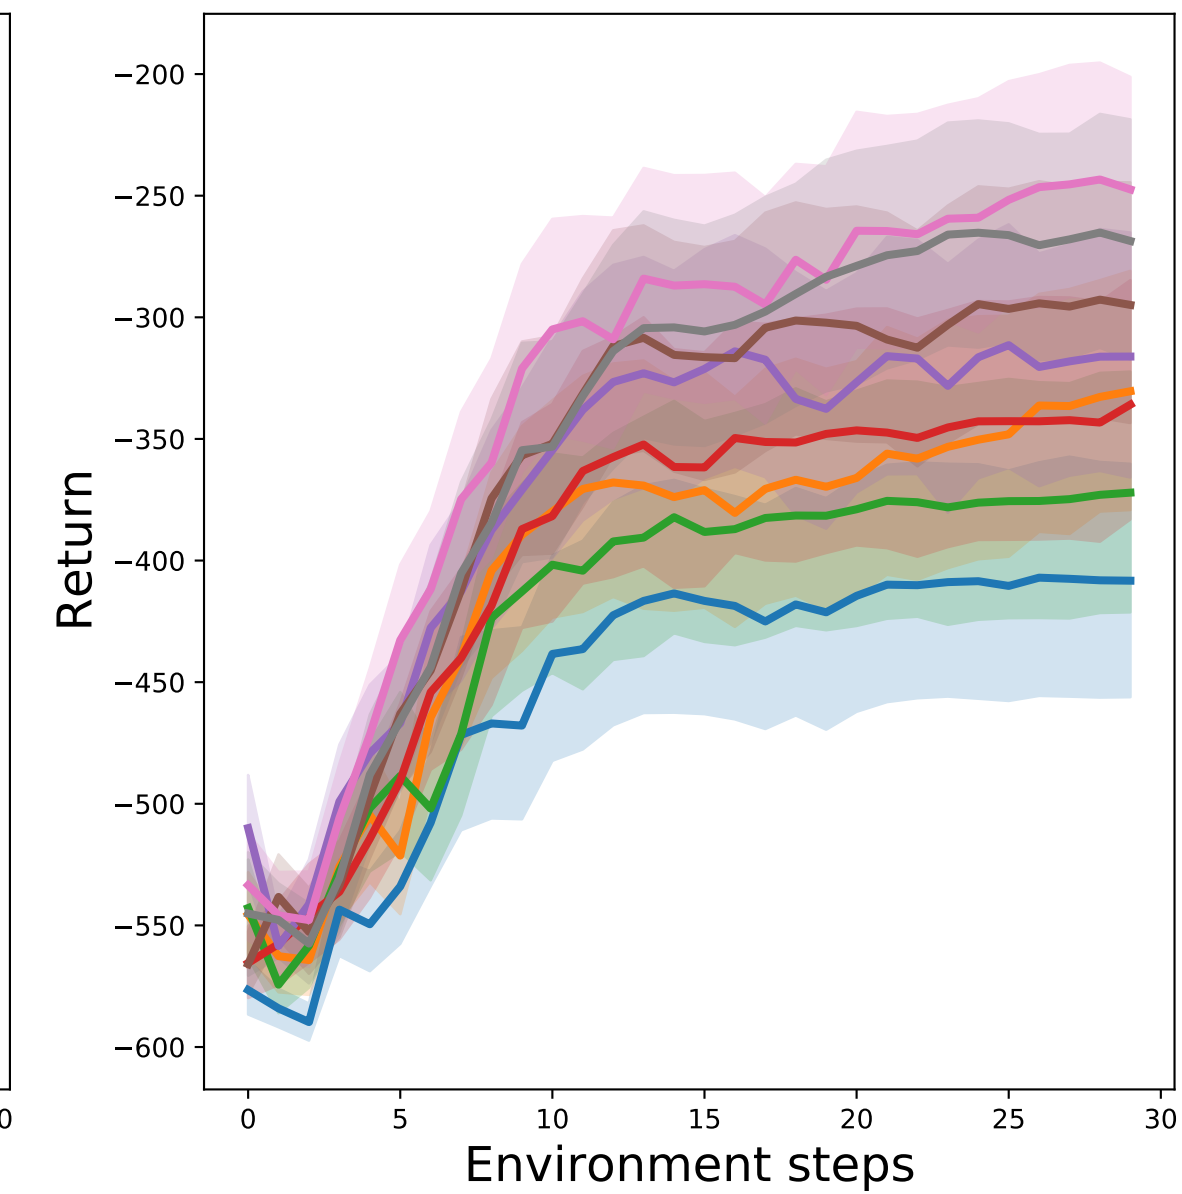

Acrobot

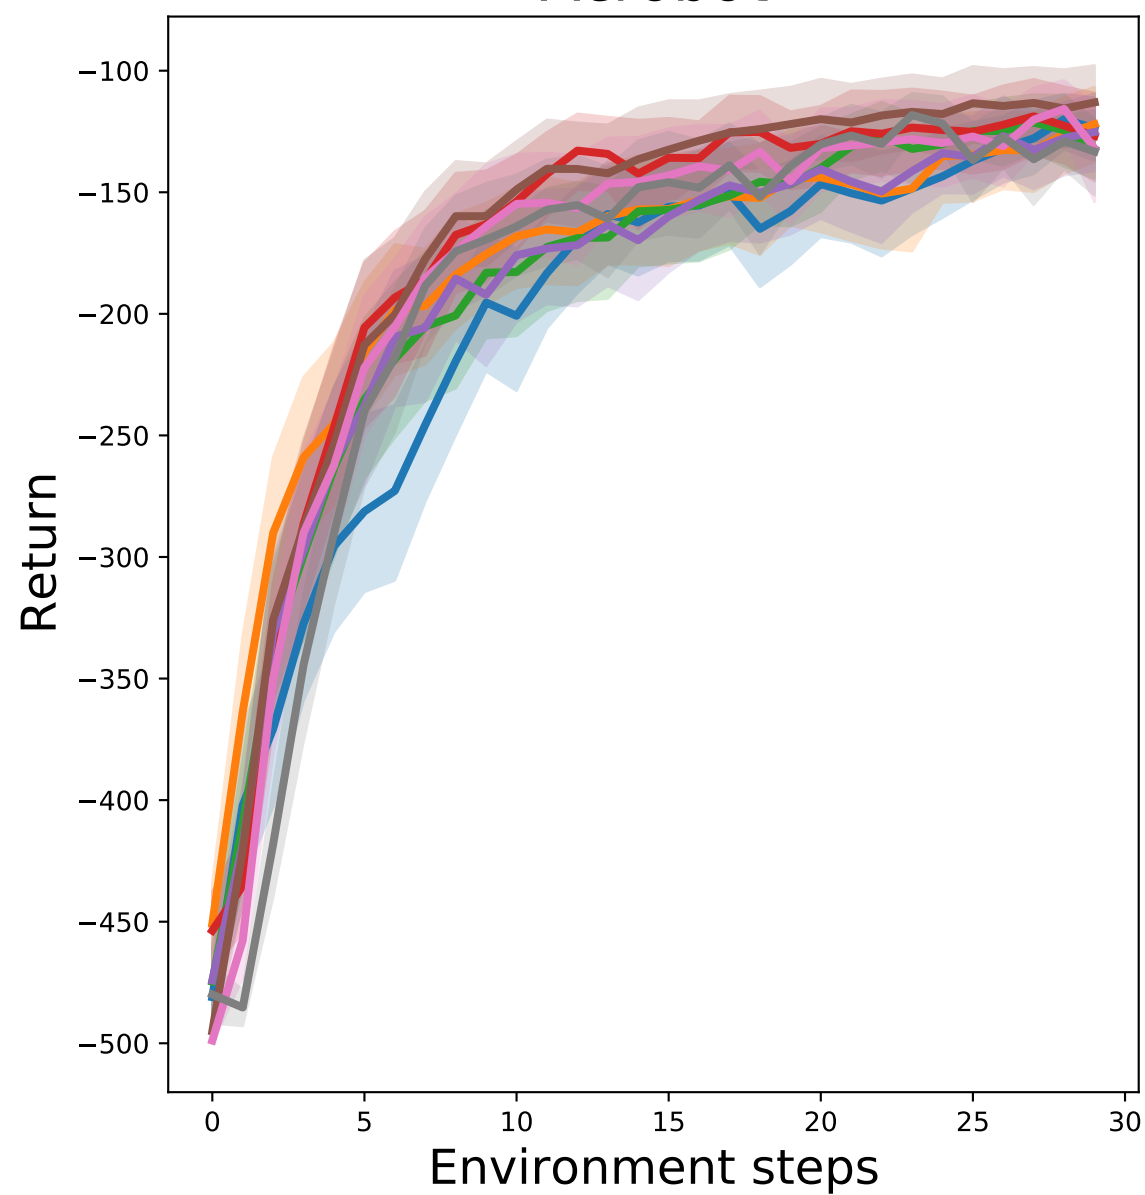

CartPole

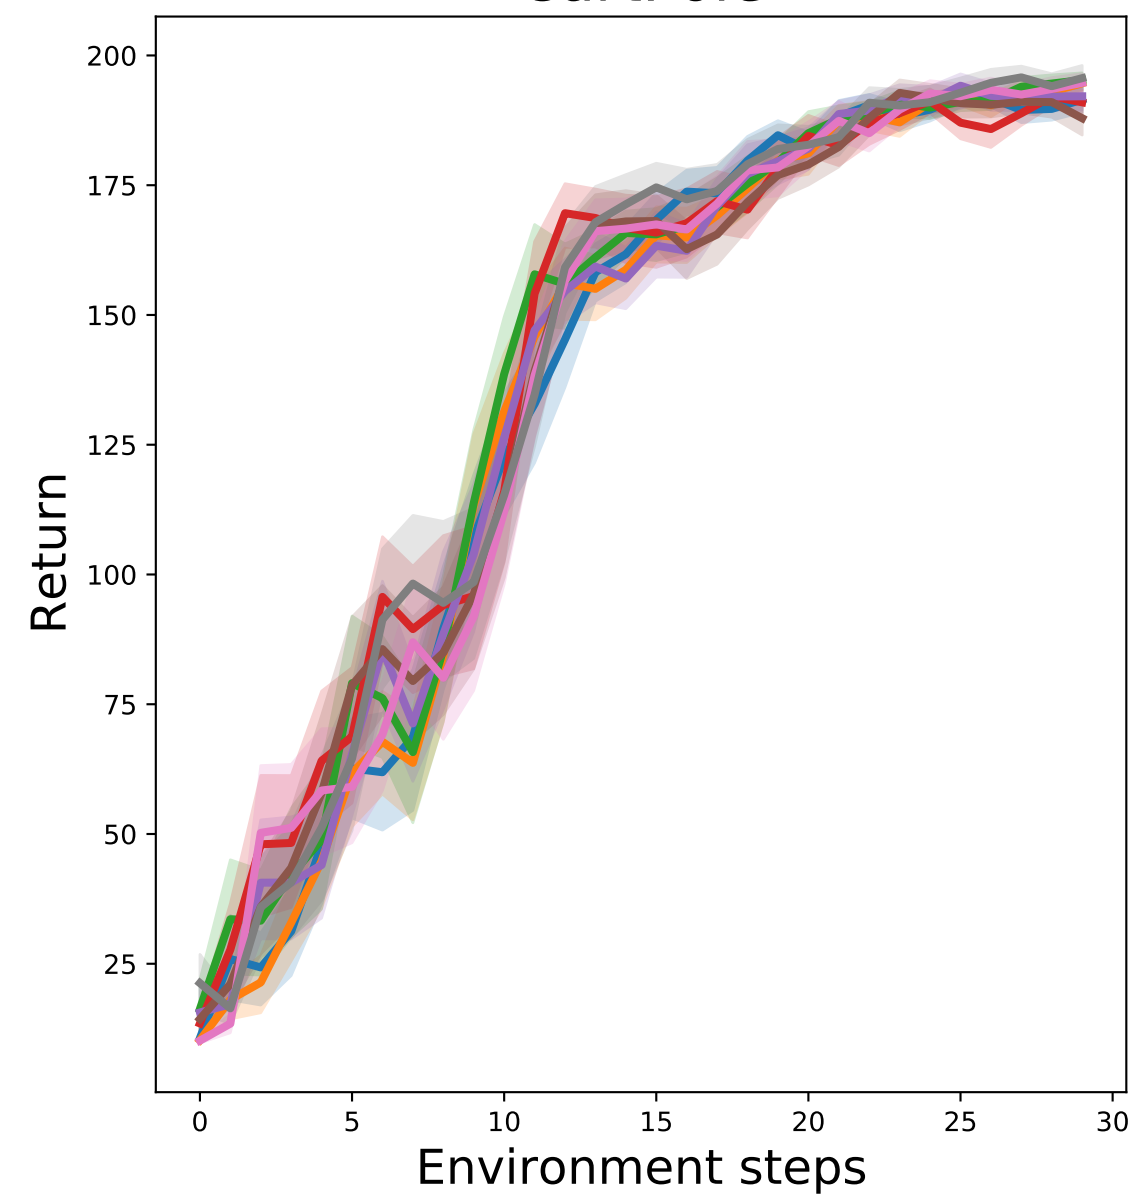

LunarLander

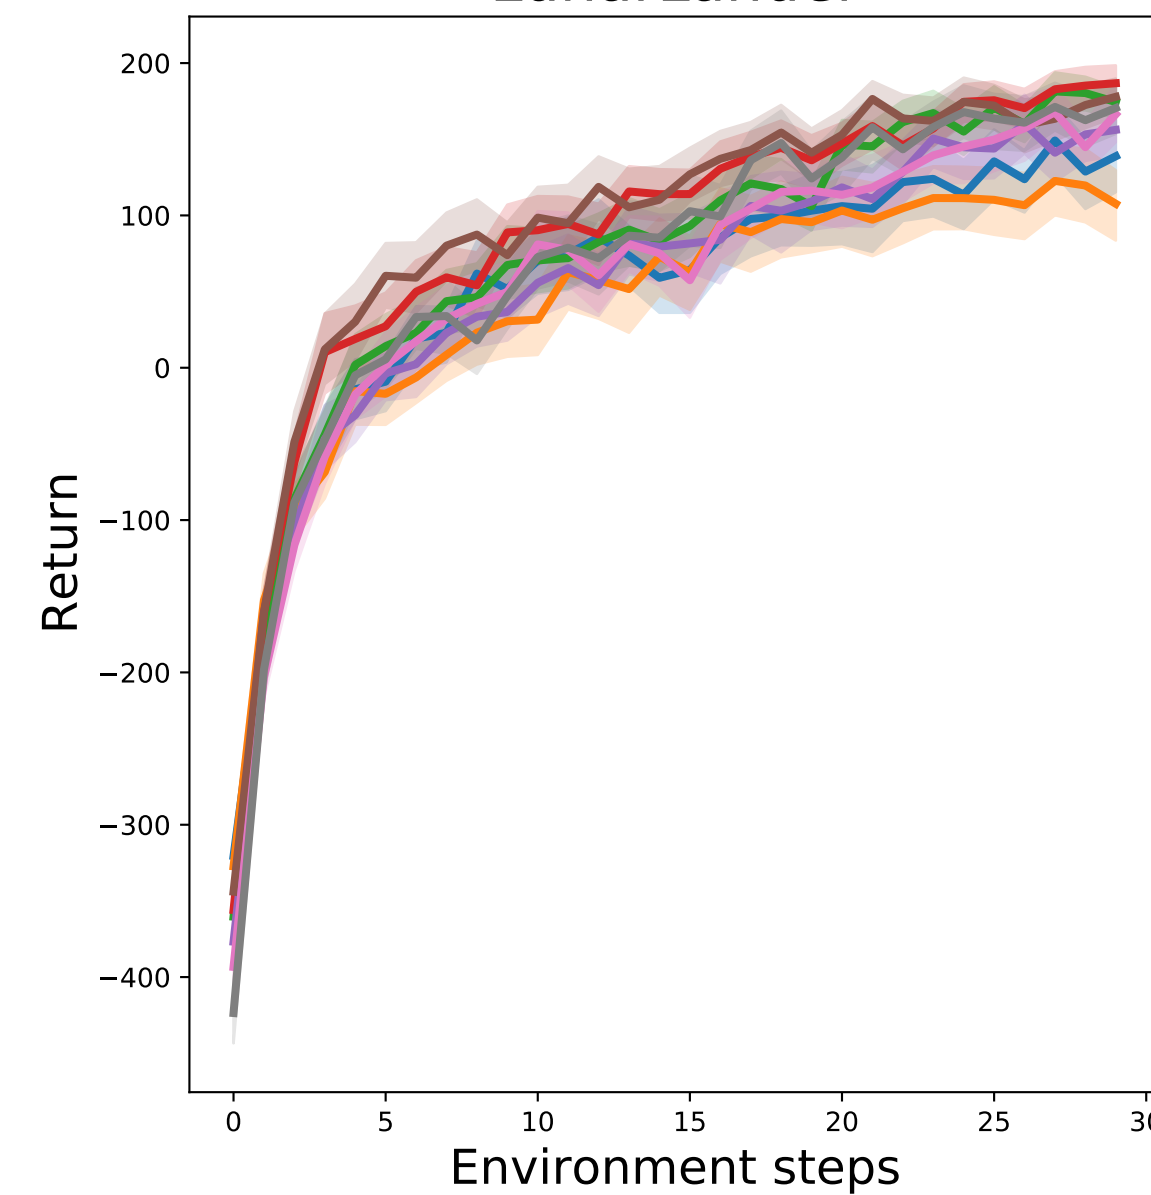

MountainCar

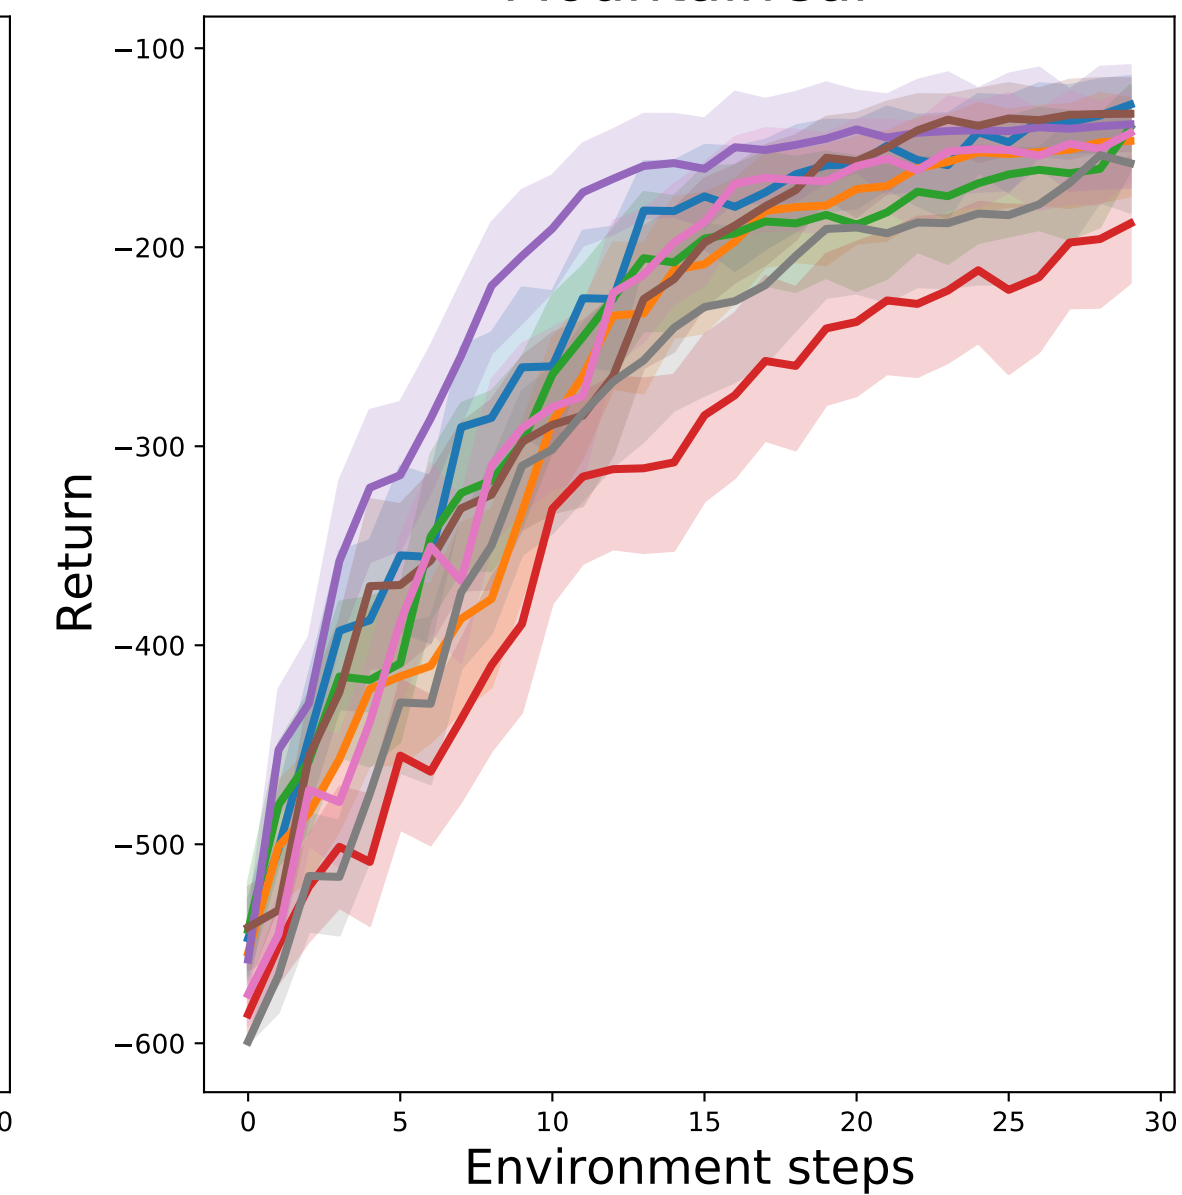

Supplement: supplementary_material [file attachment]

Acrobot

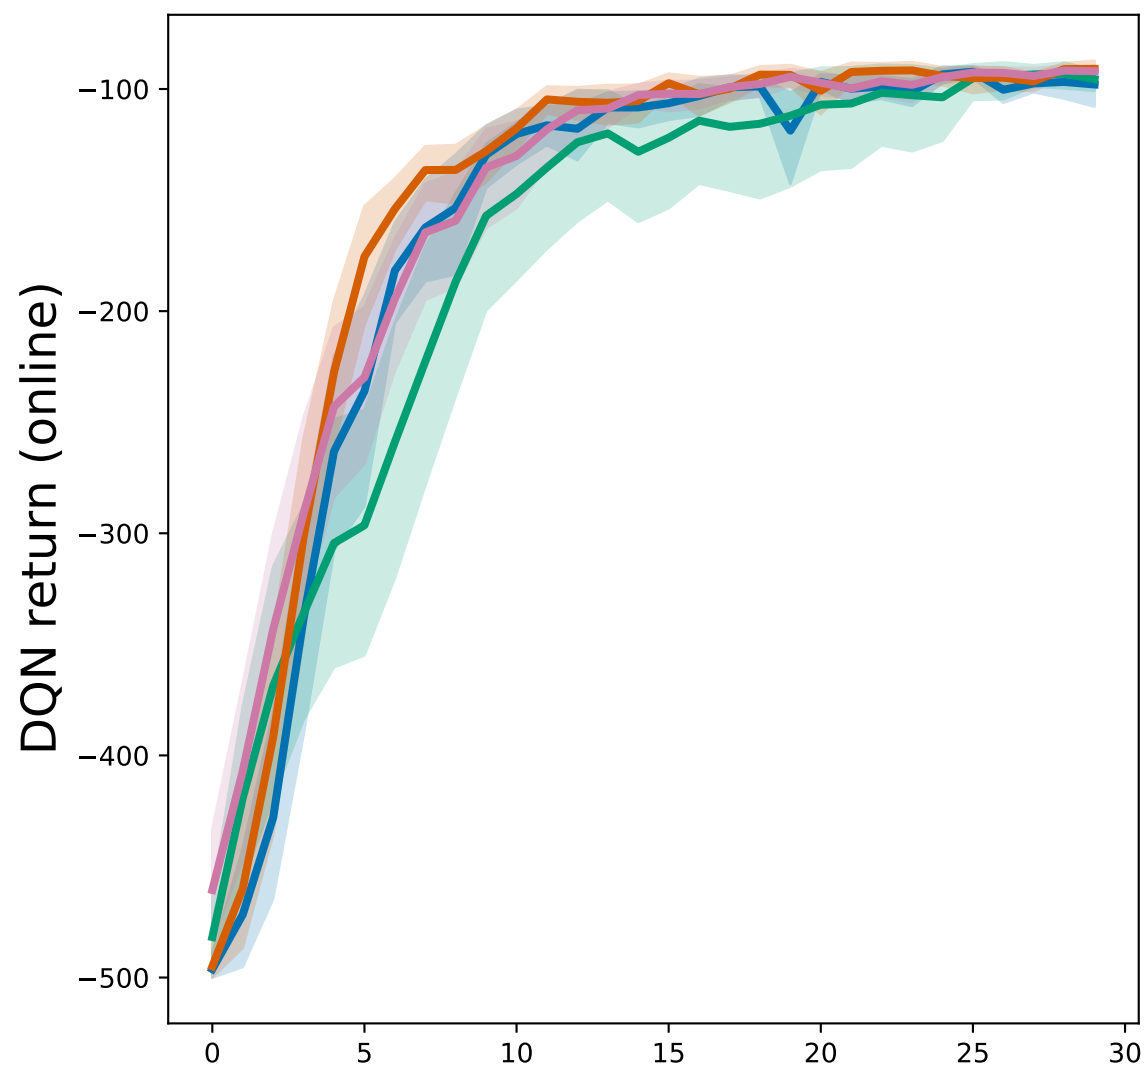

CartPole

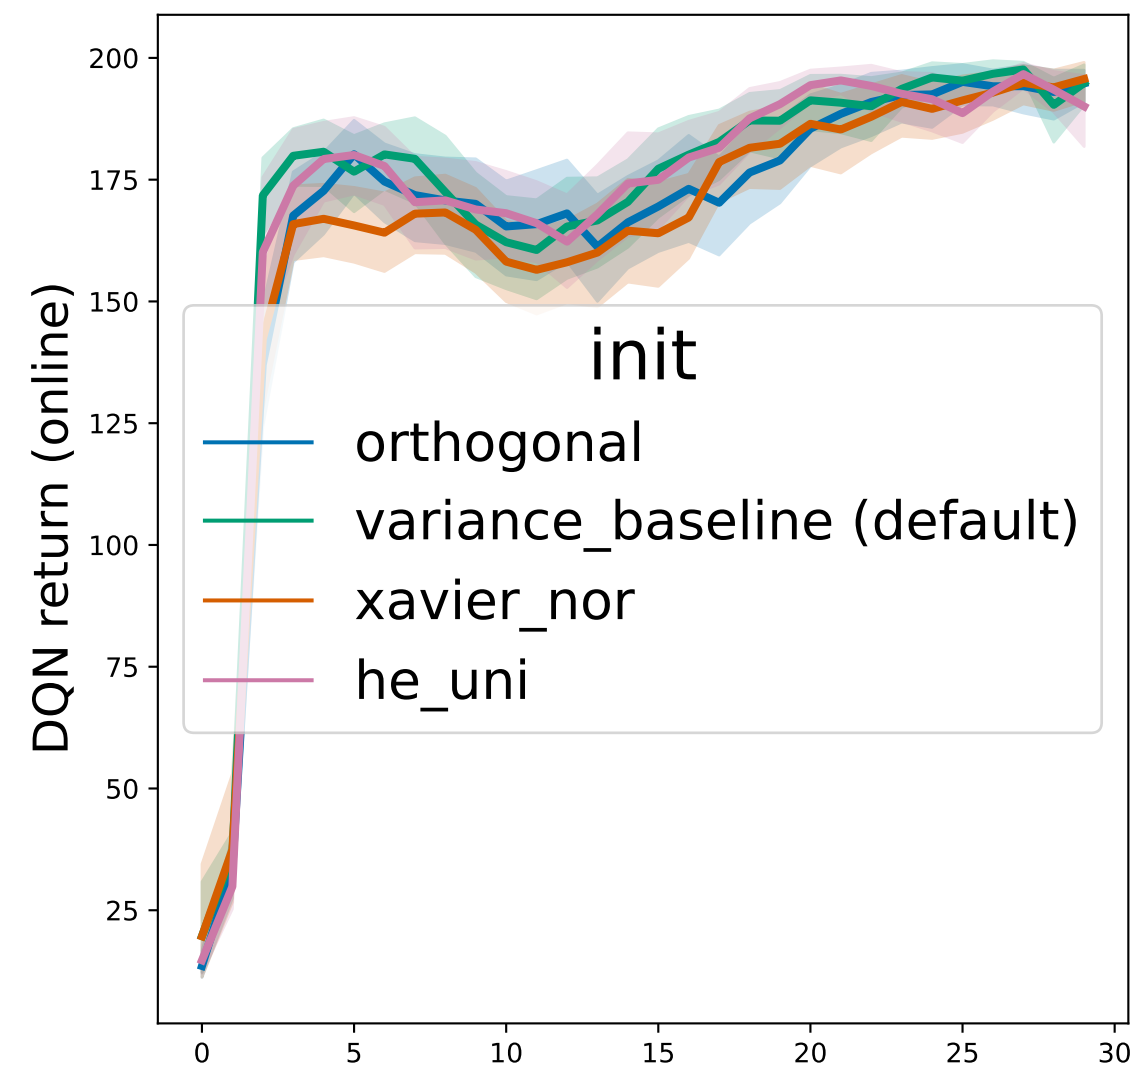

LunarLander

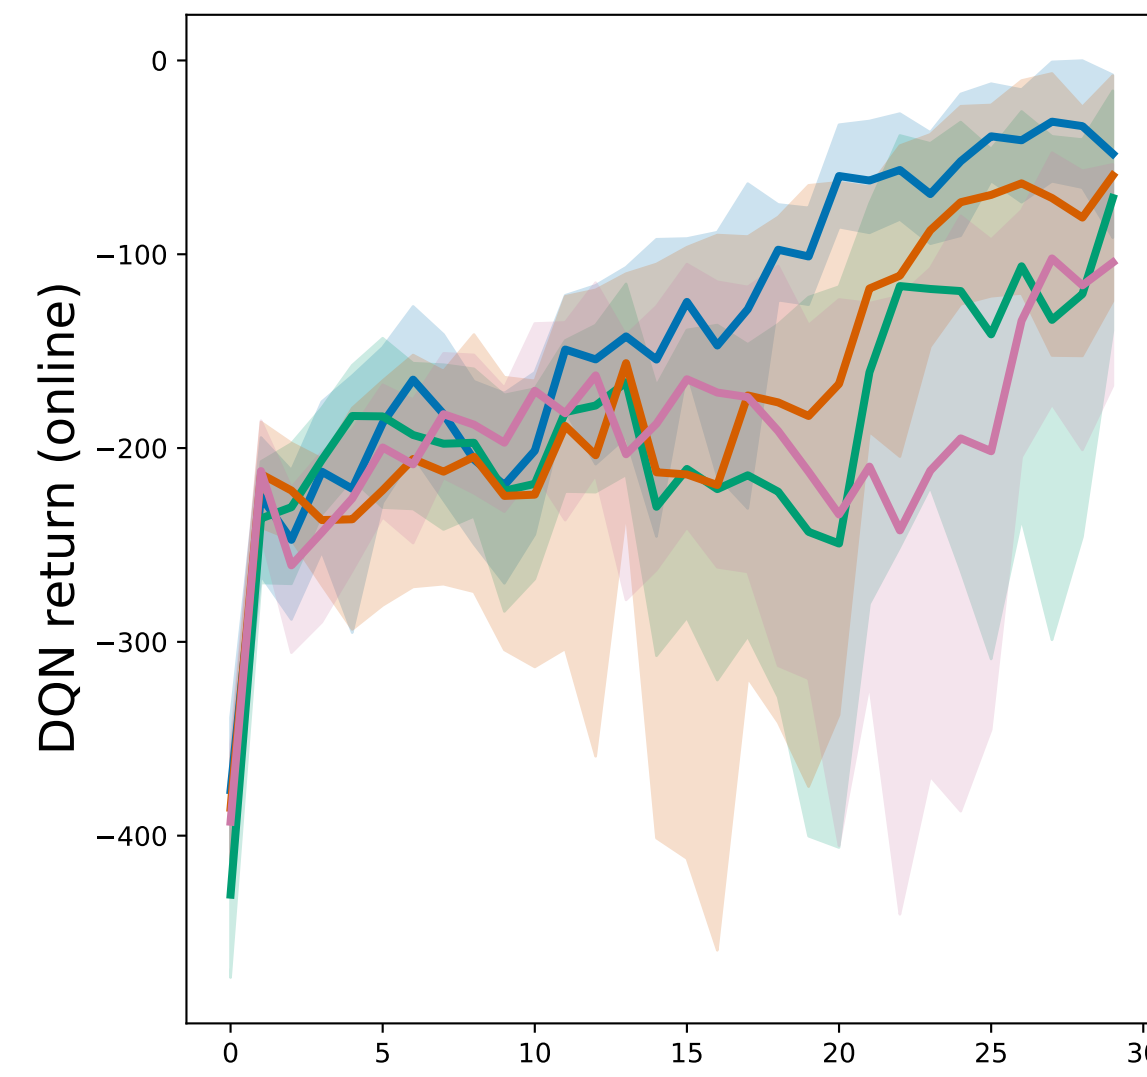

MountainCar

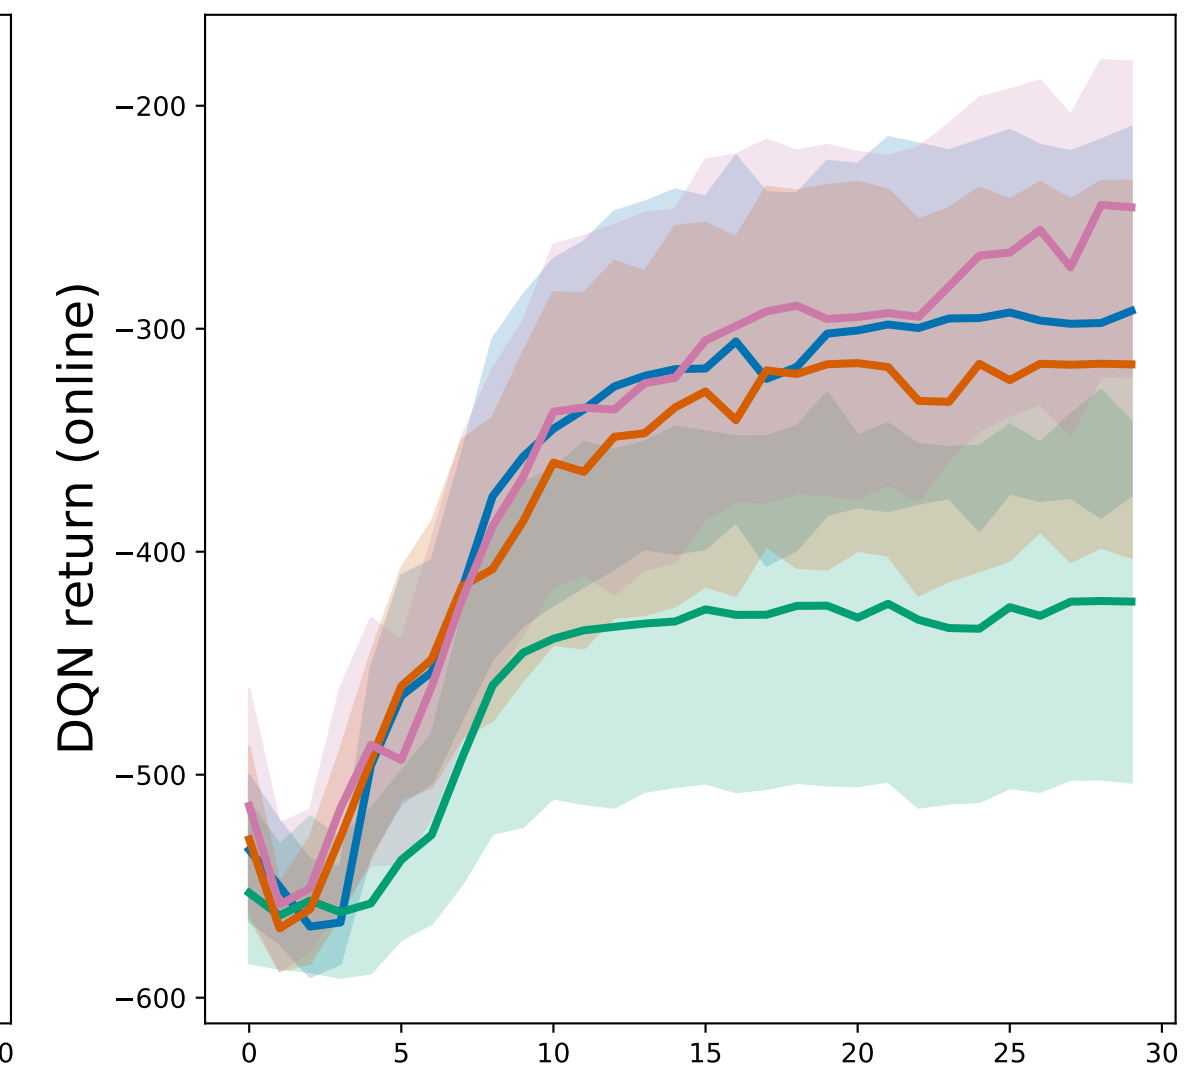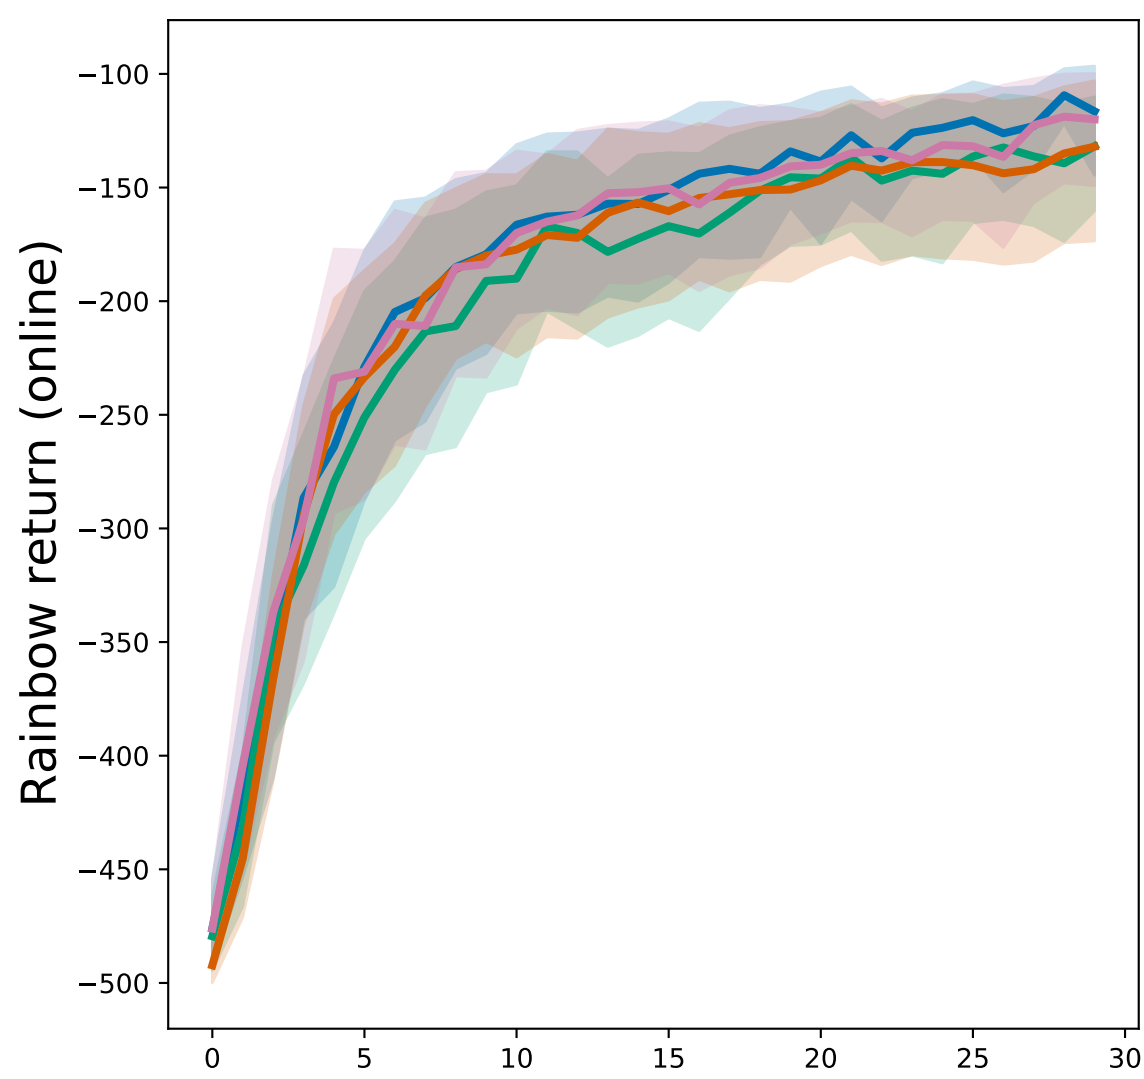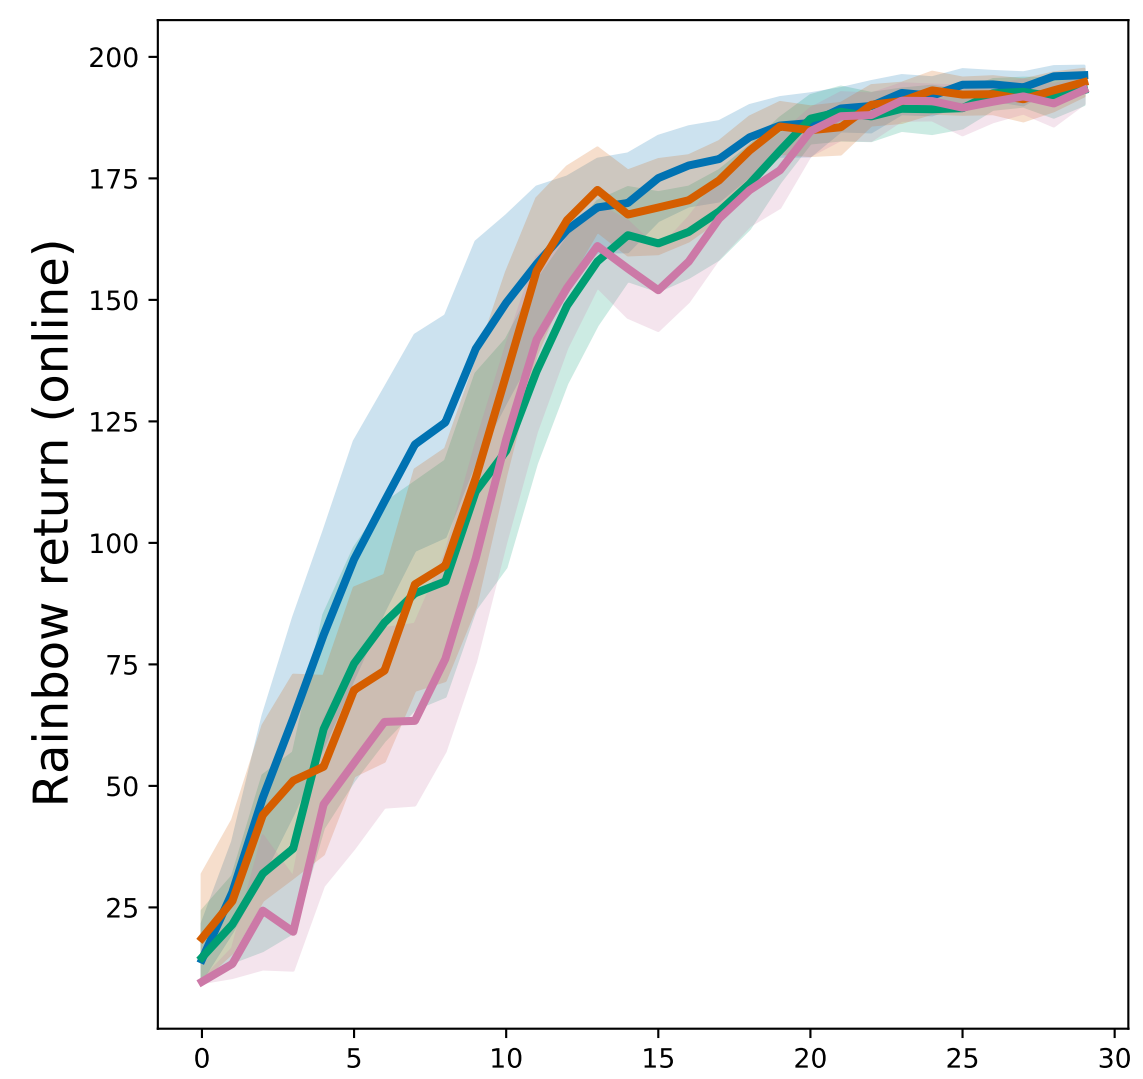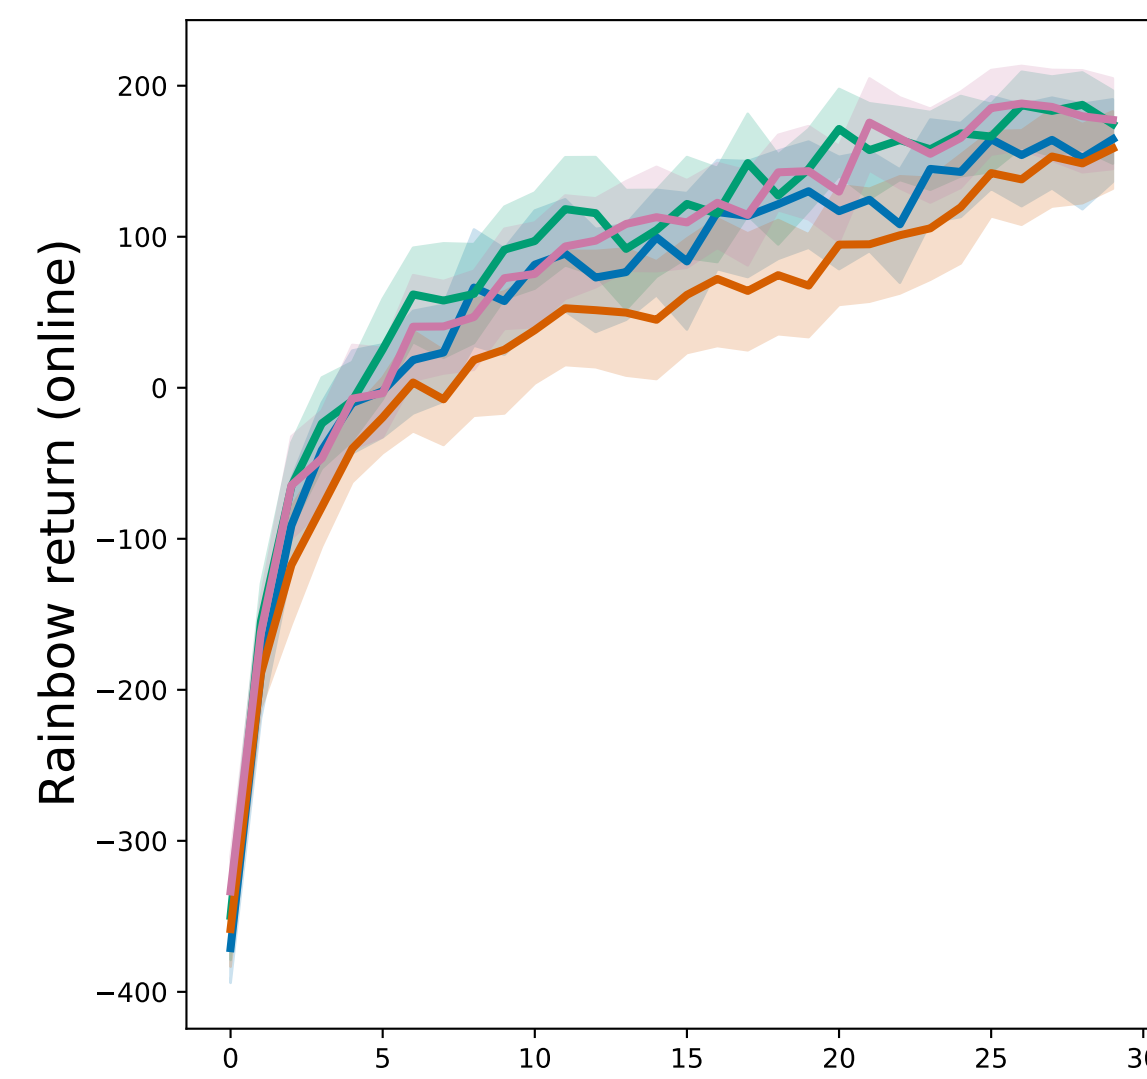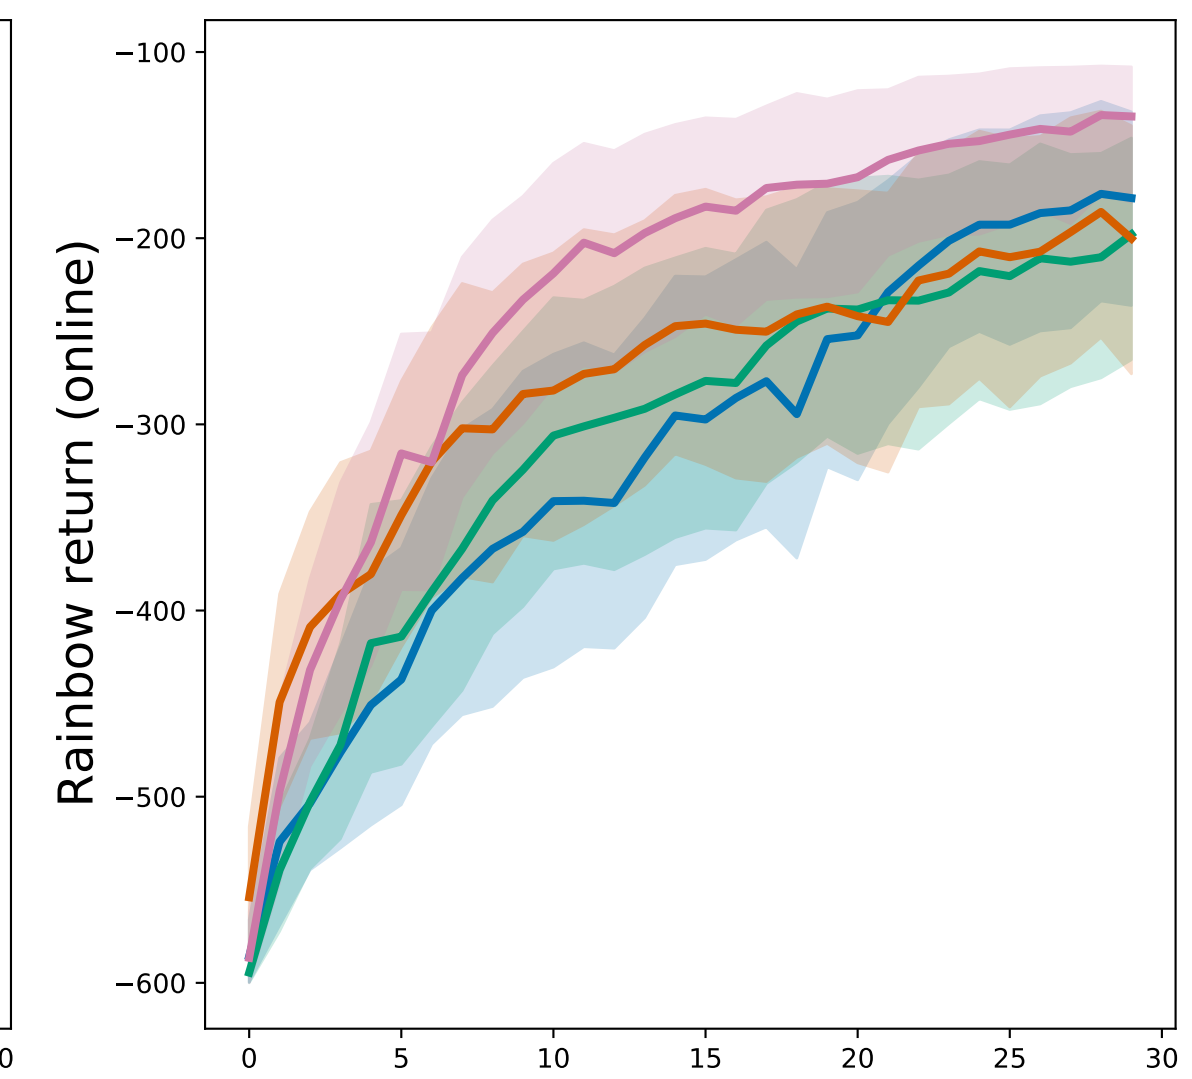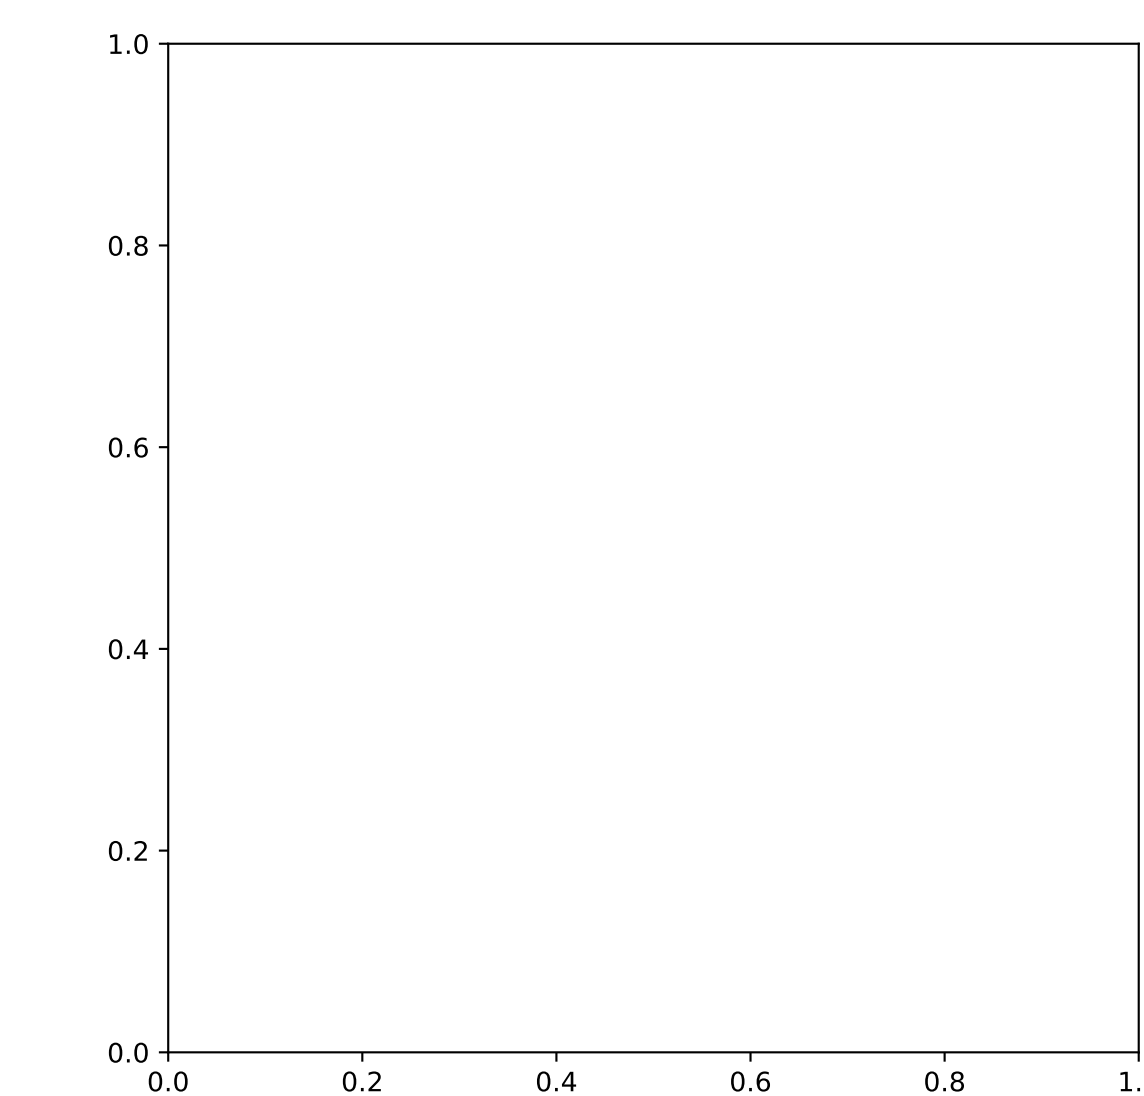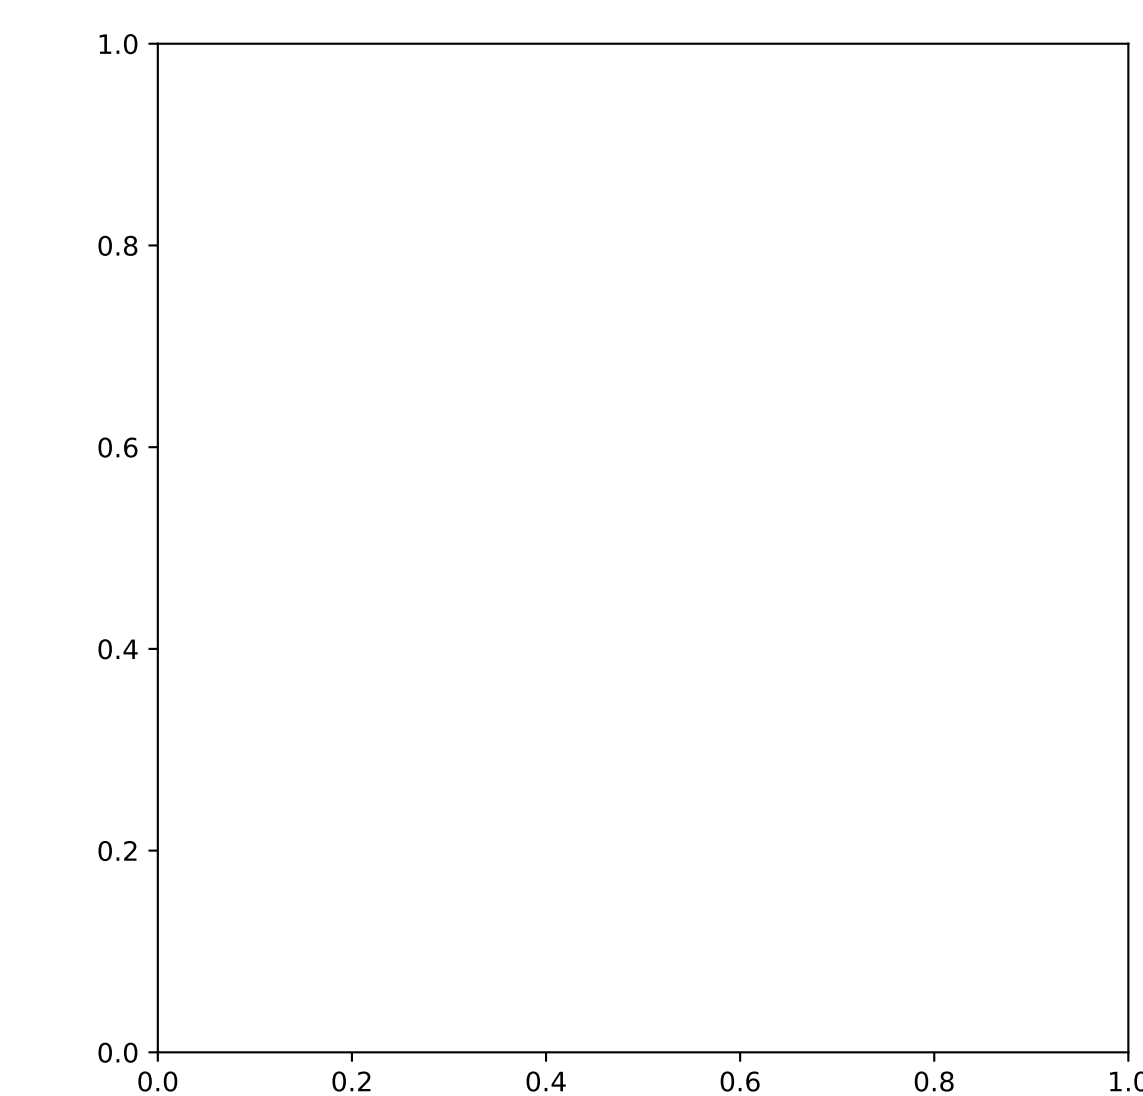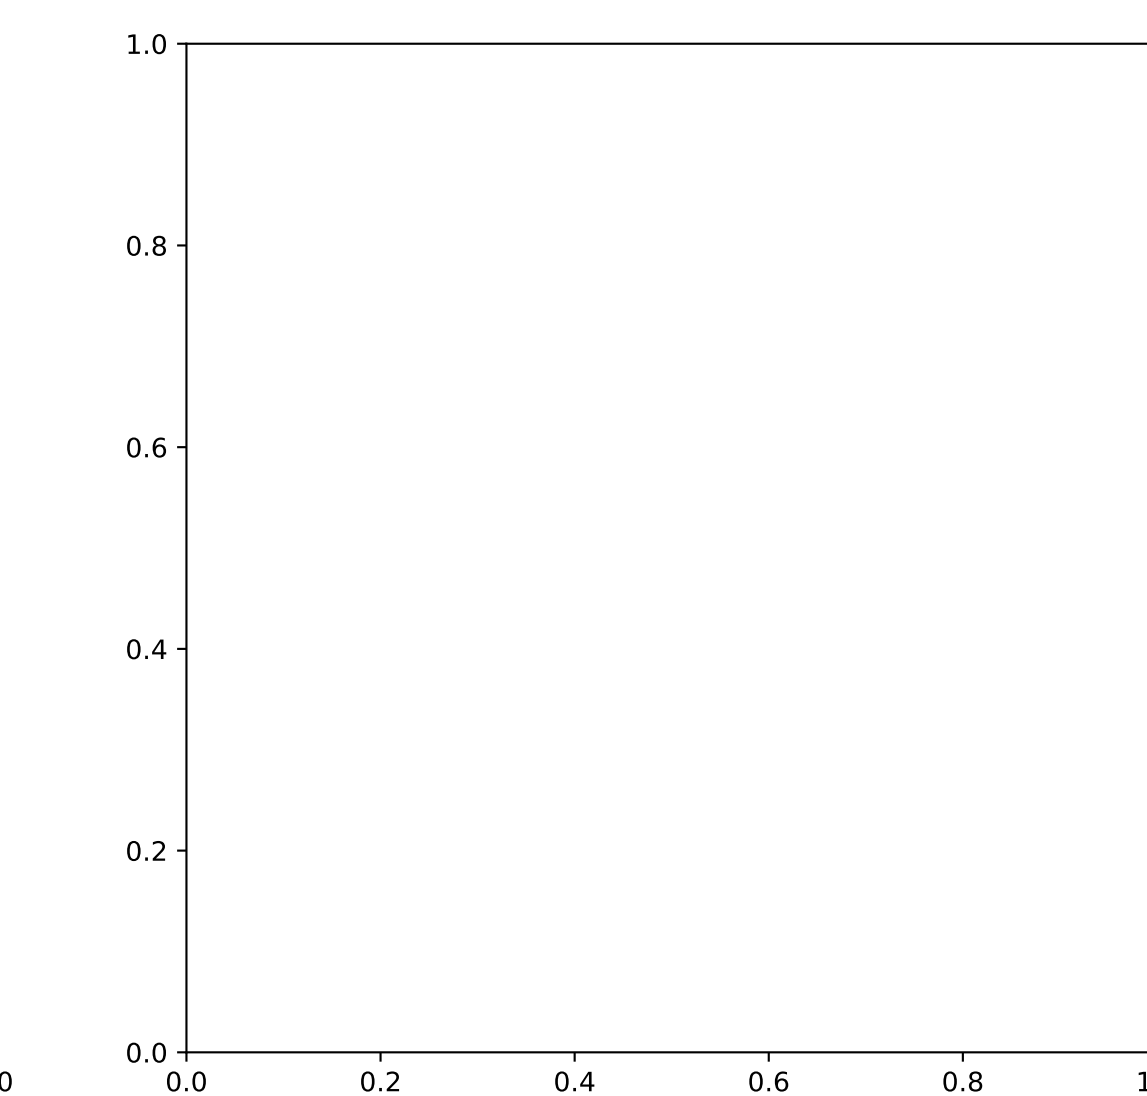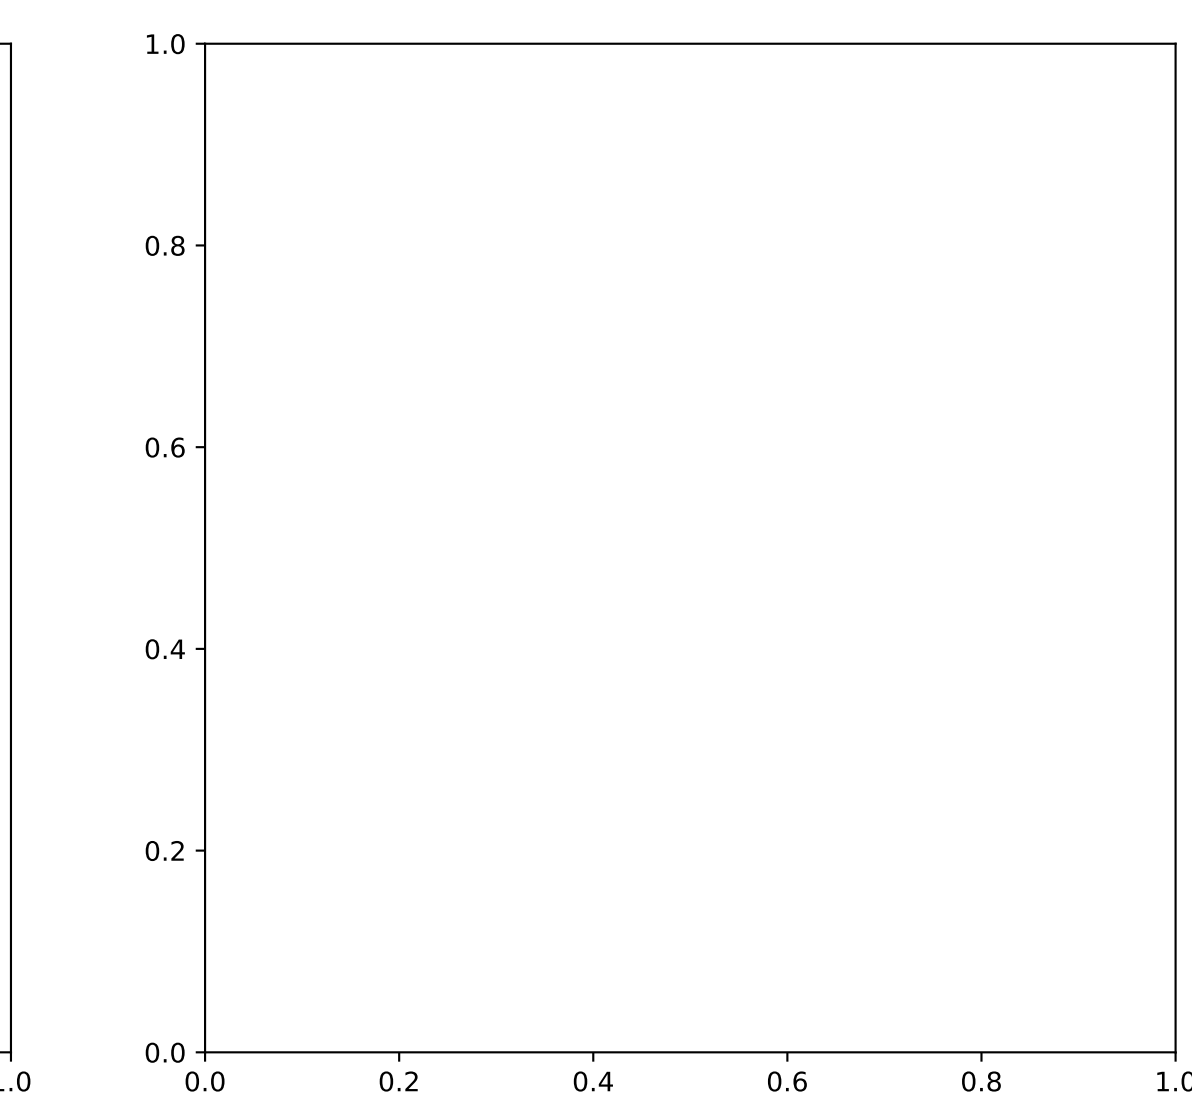

Supplement: supplementary_material [file attachment]

Acrobot

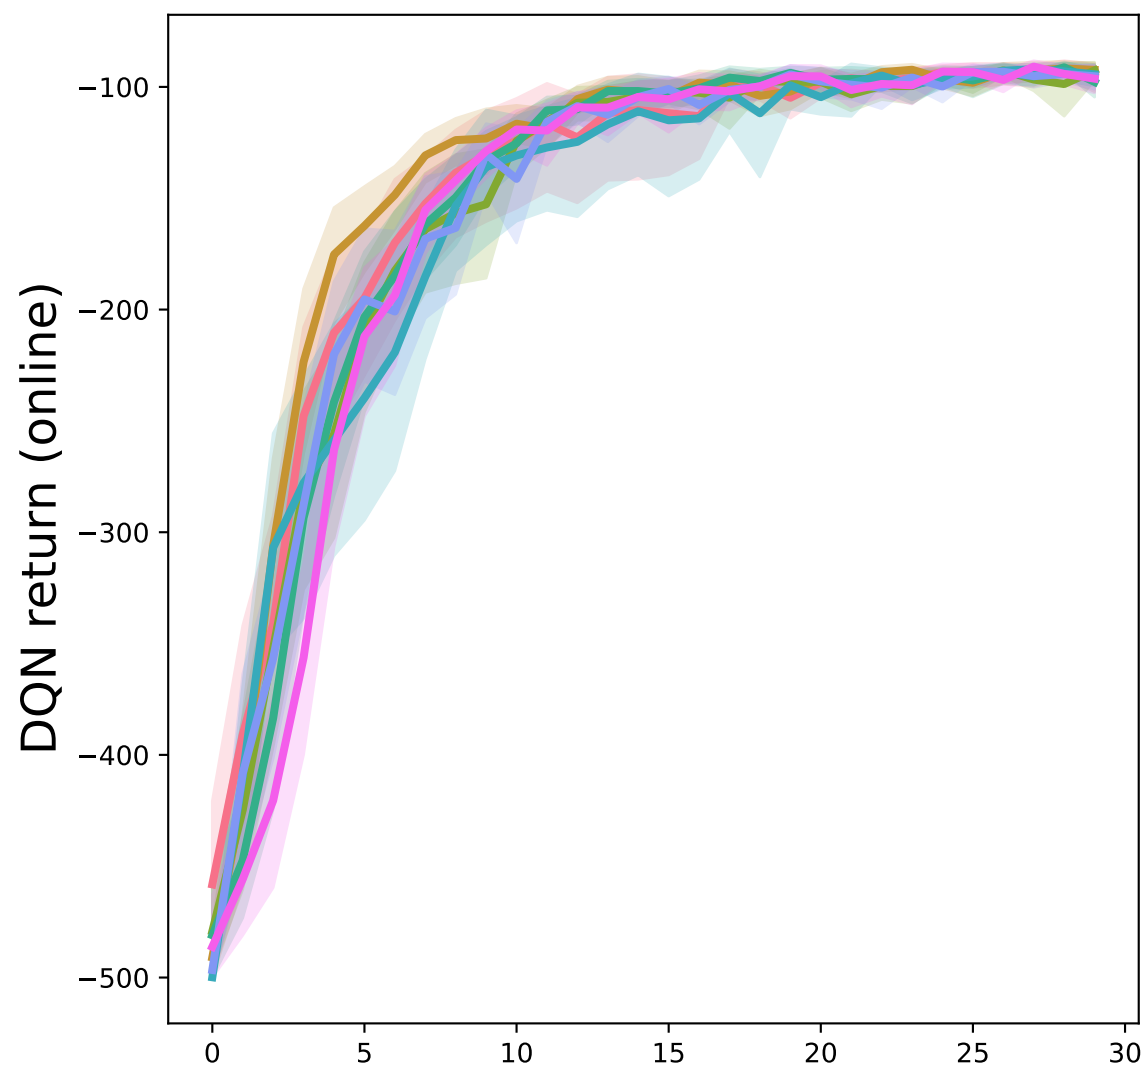

CartPole

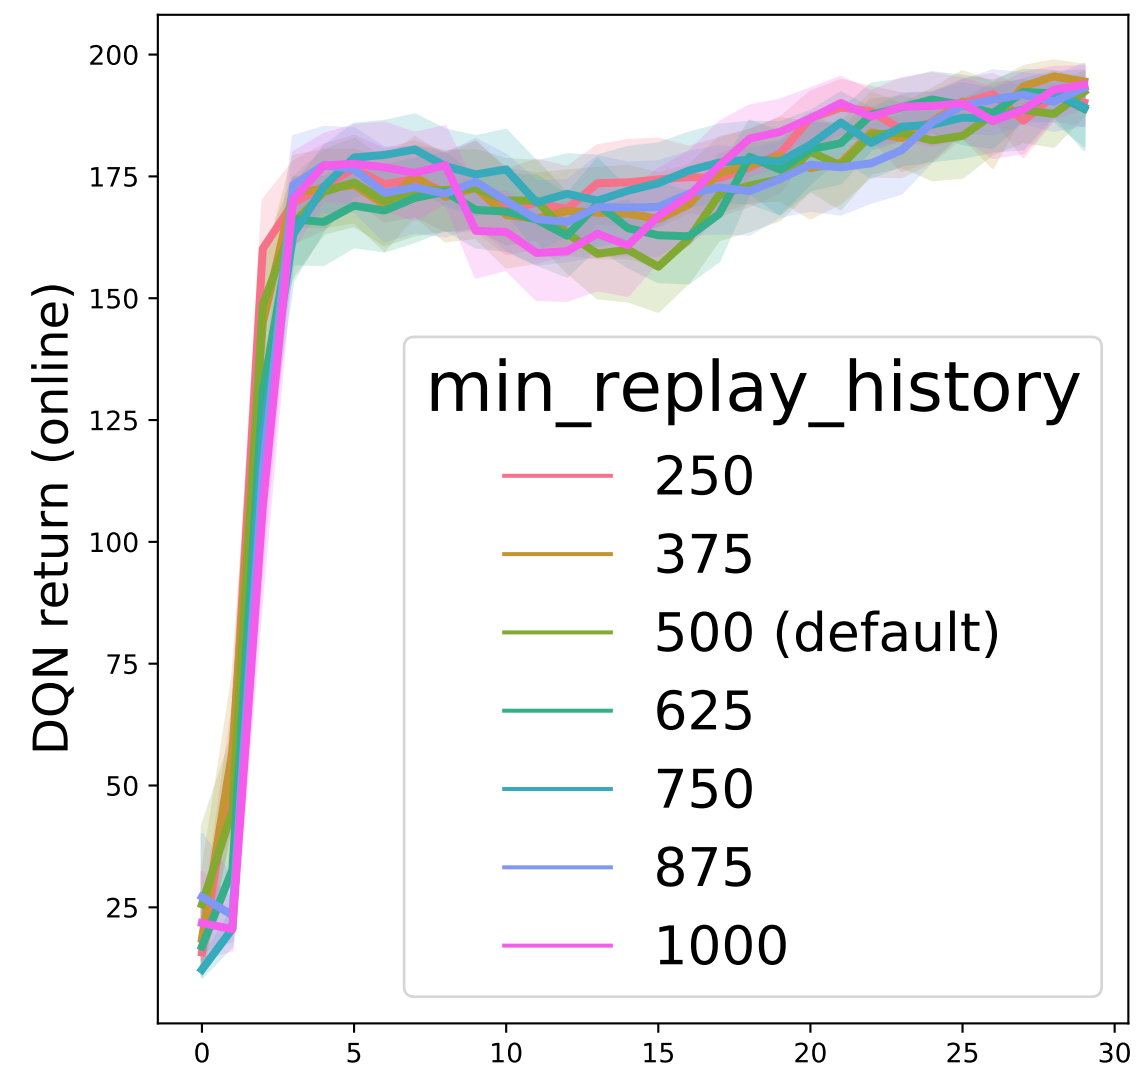

LunarLander

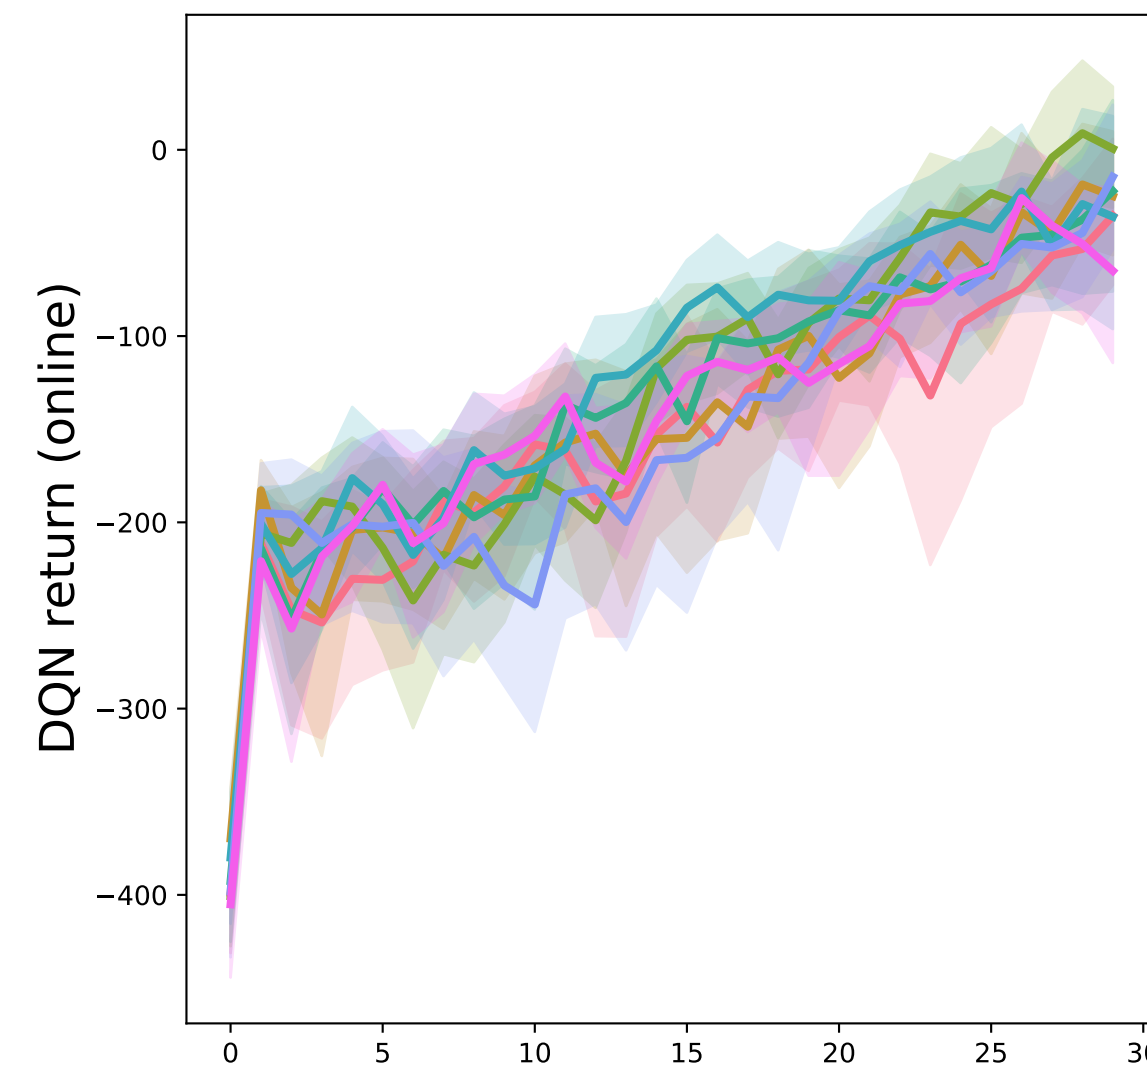

MountainCar

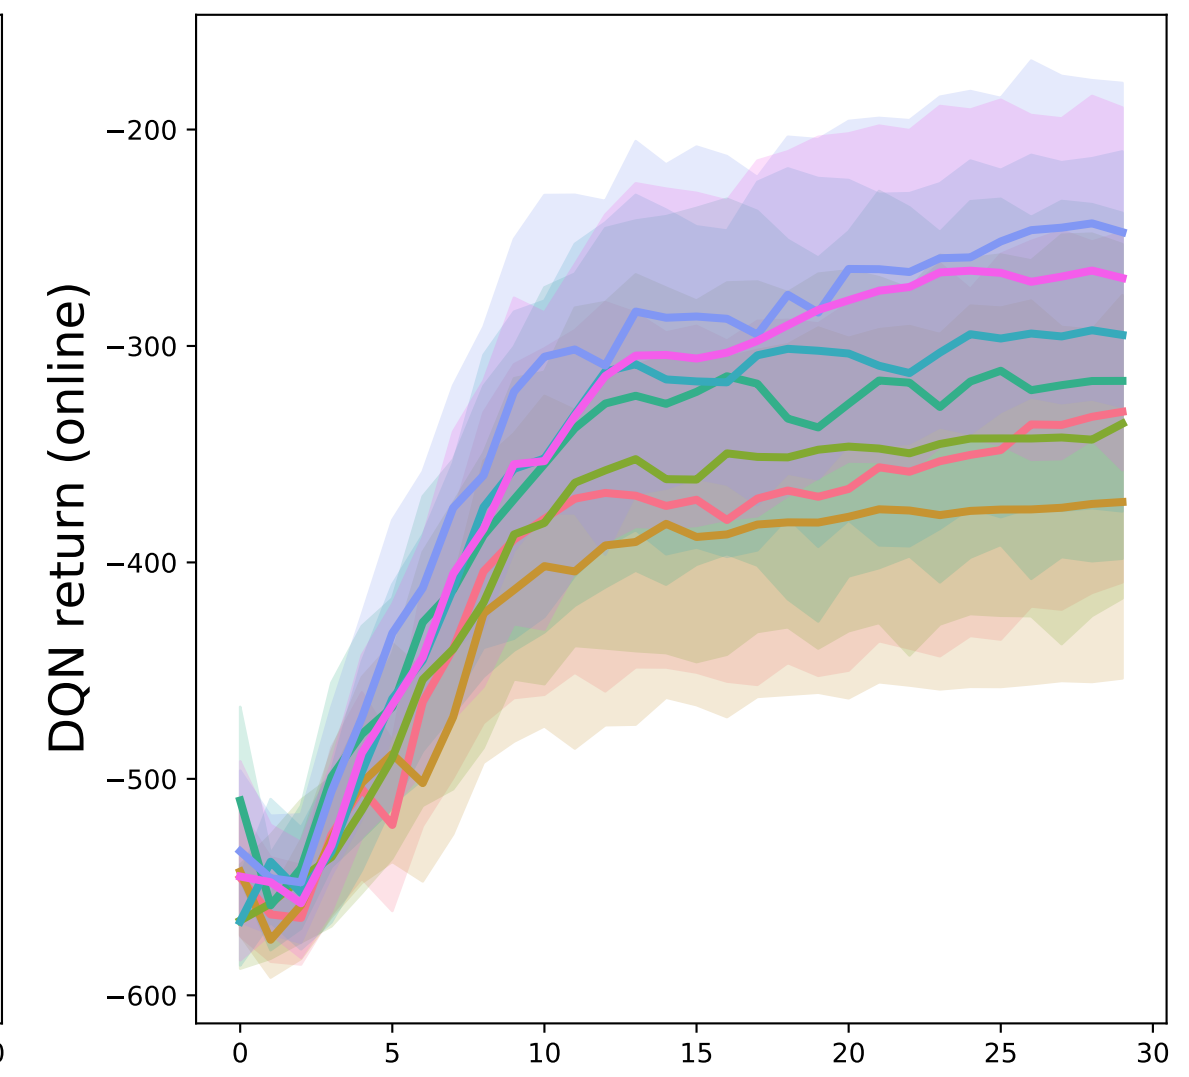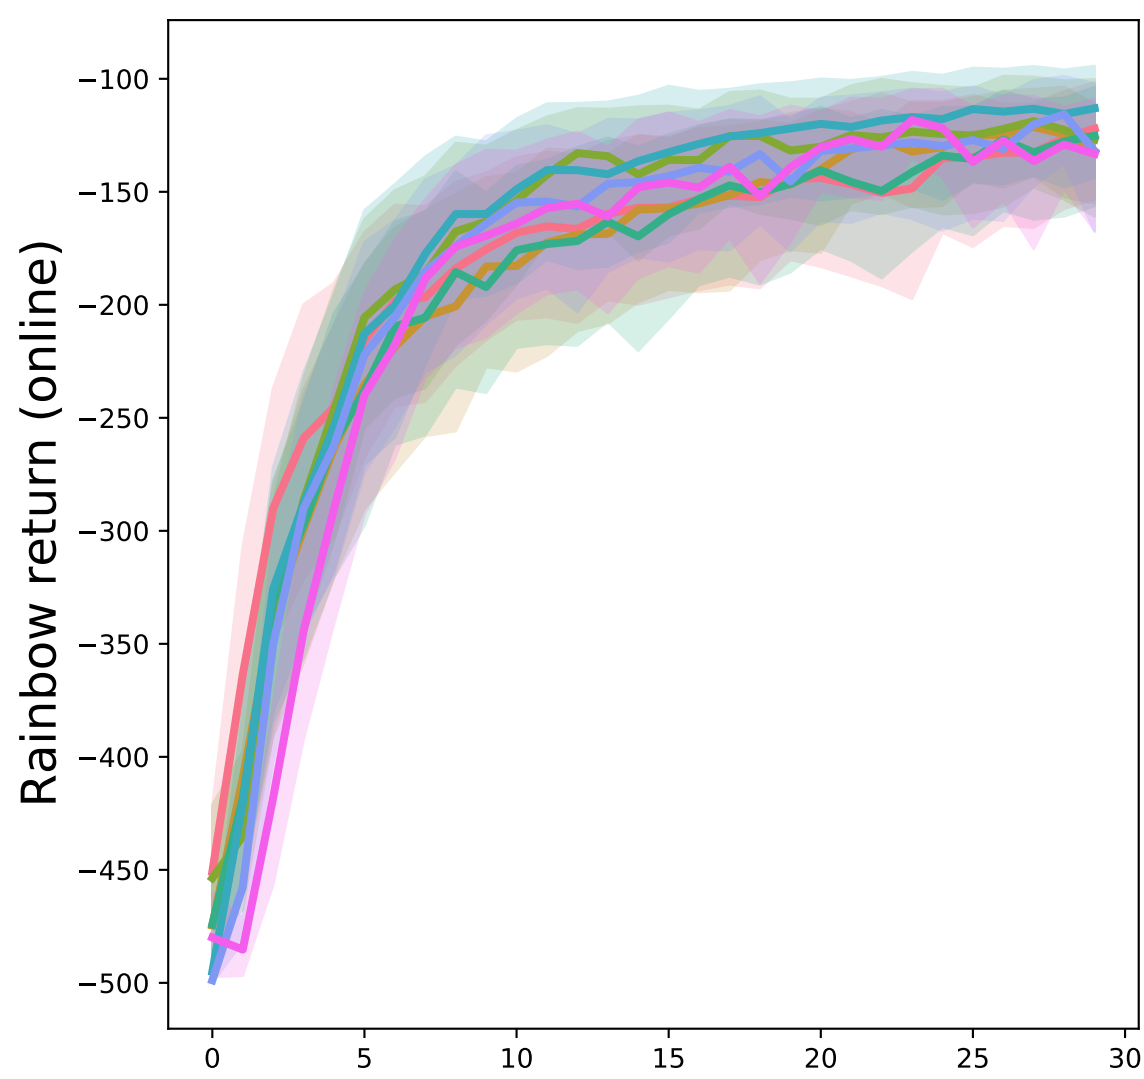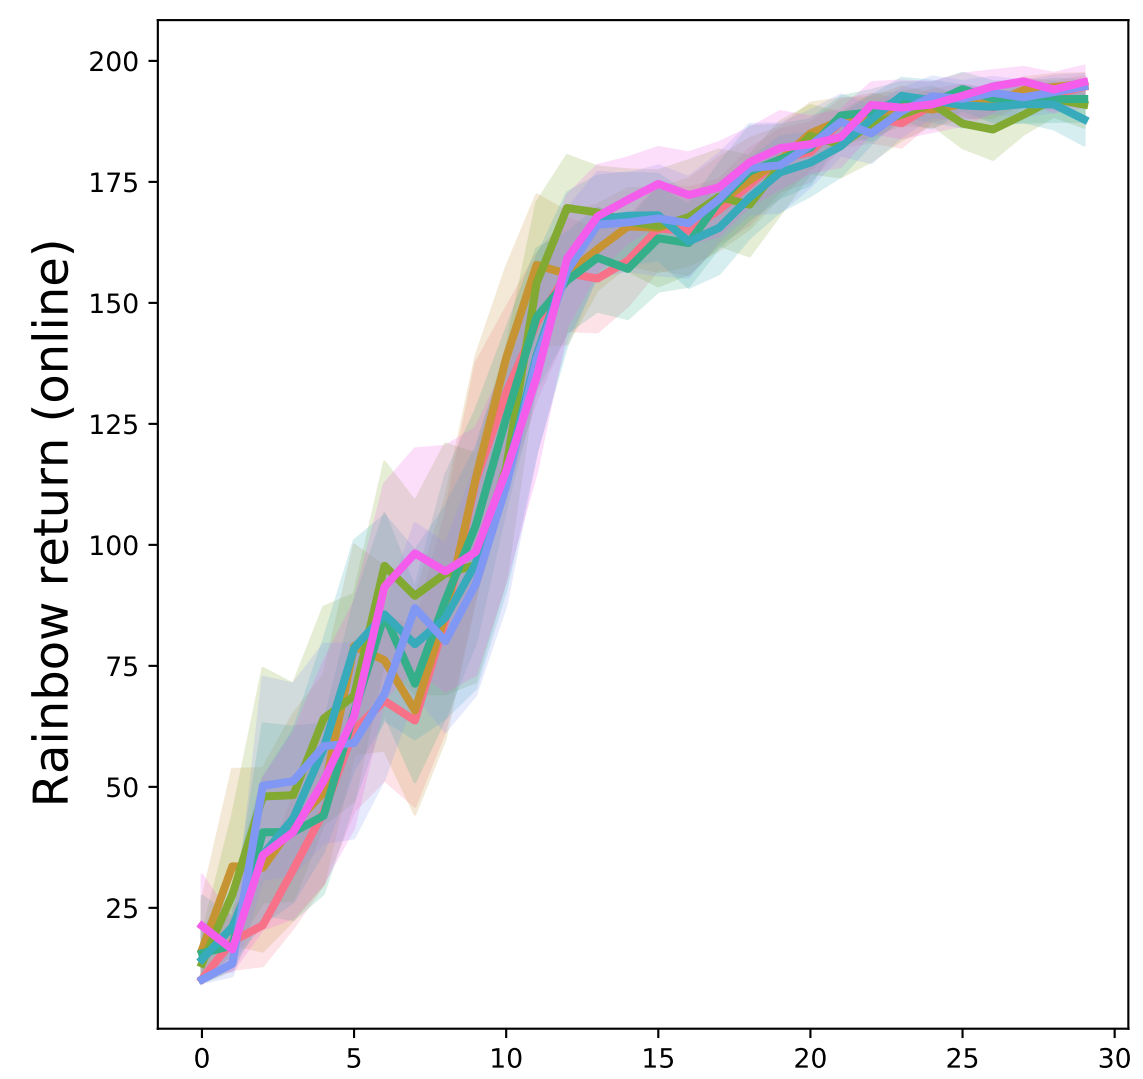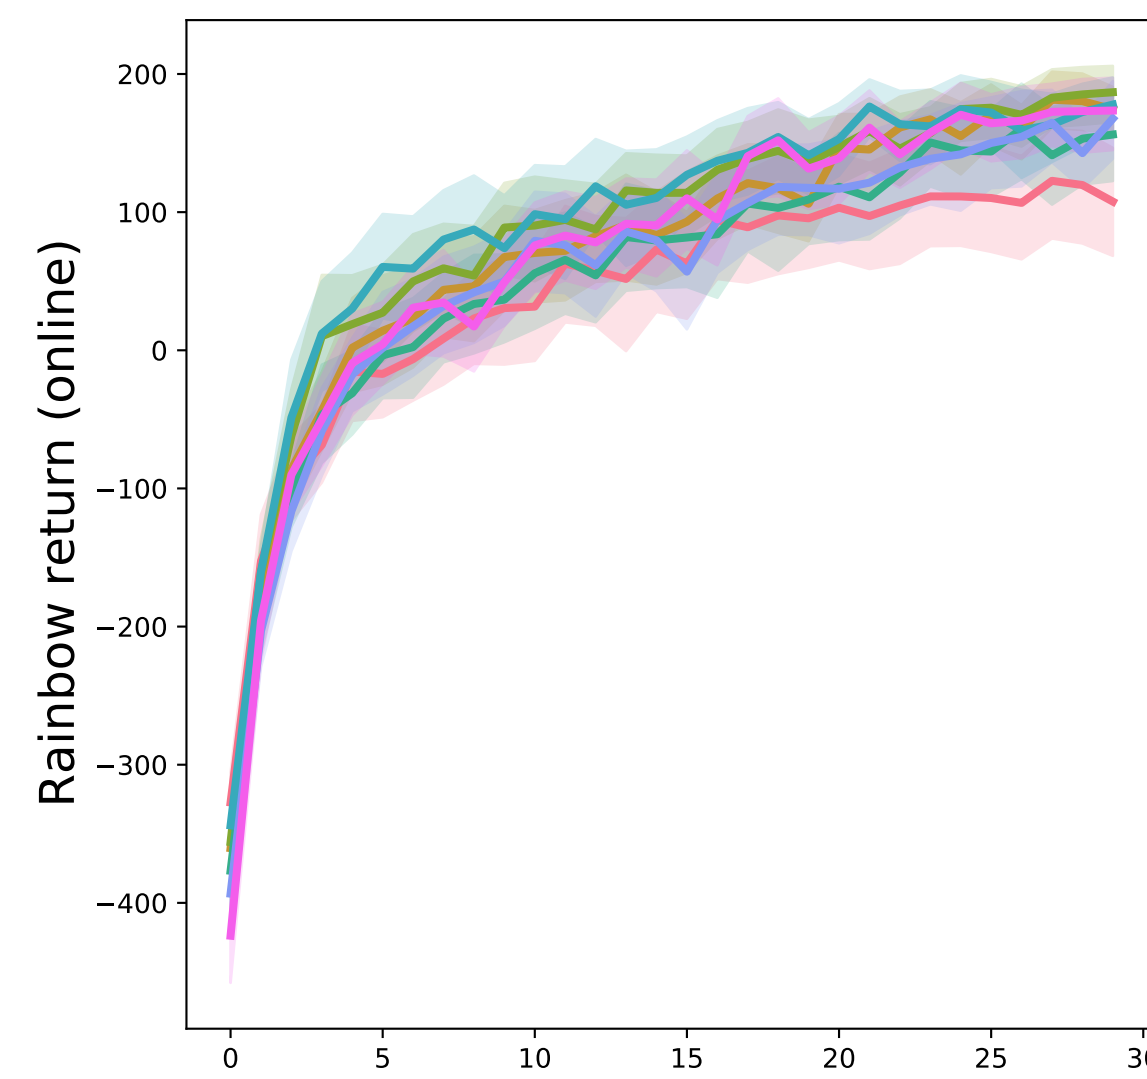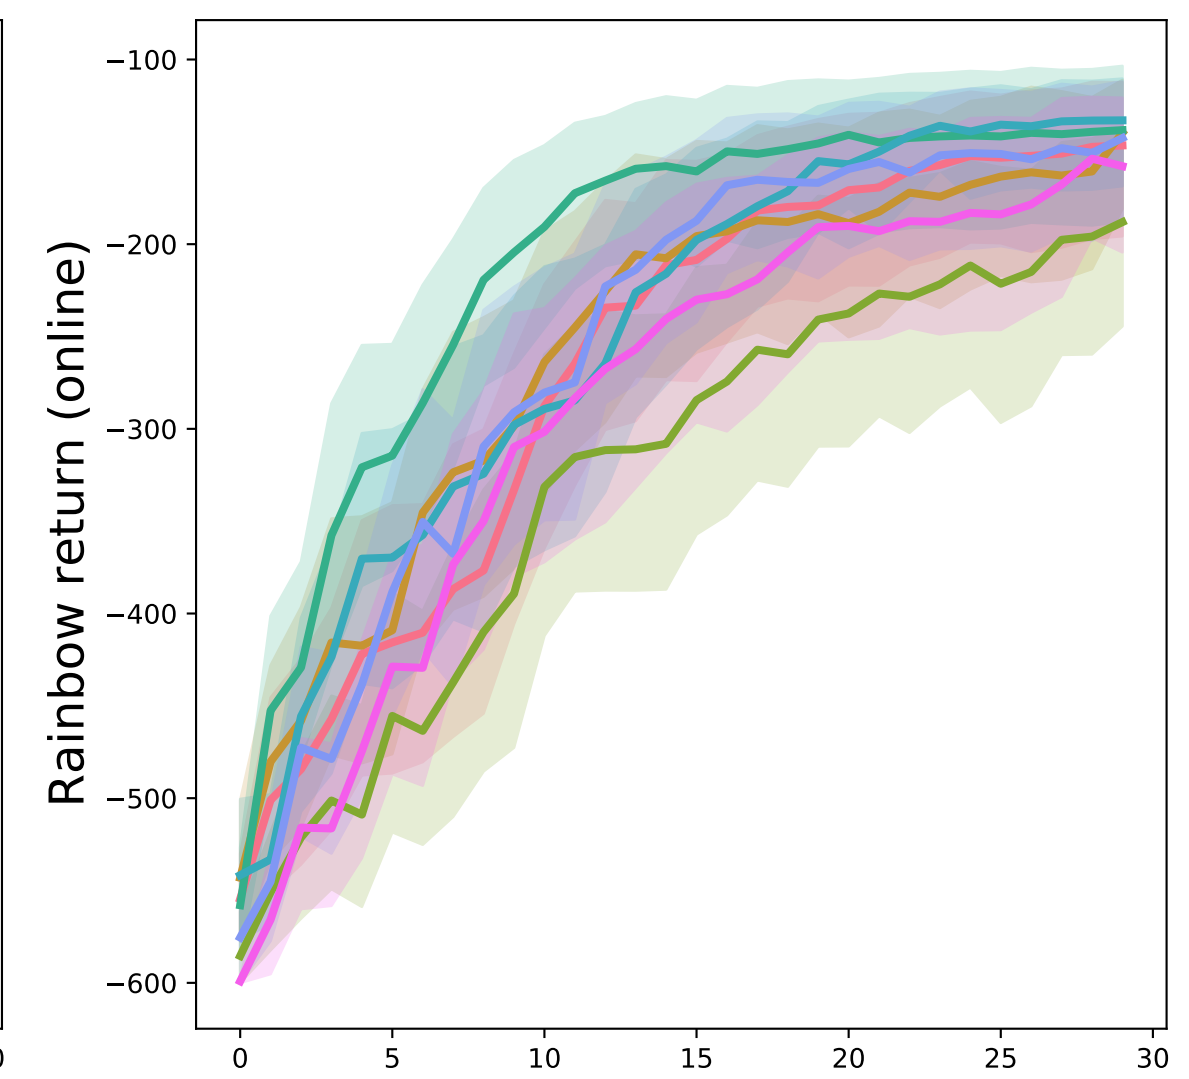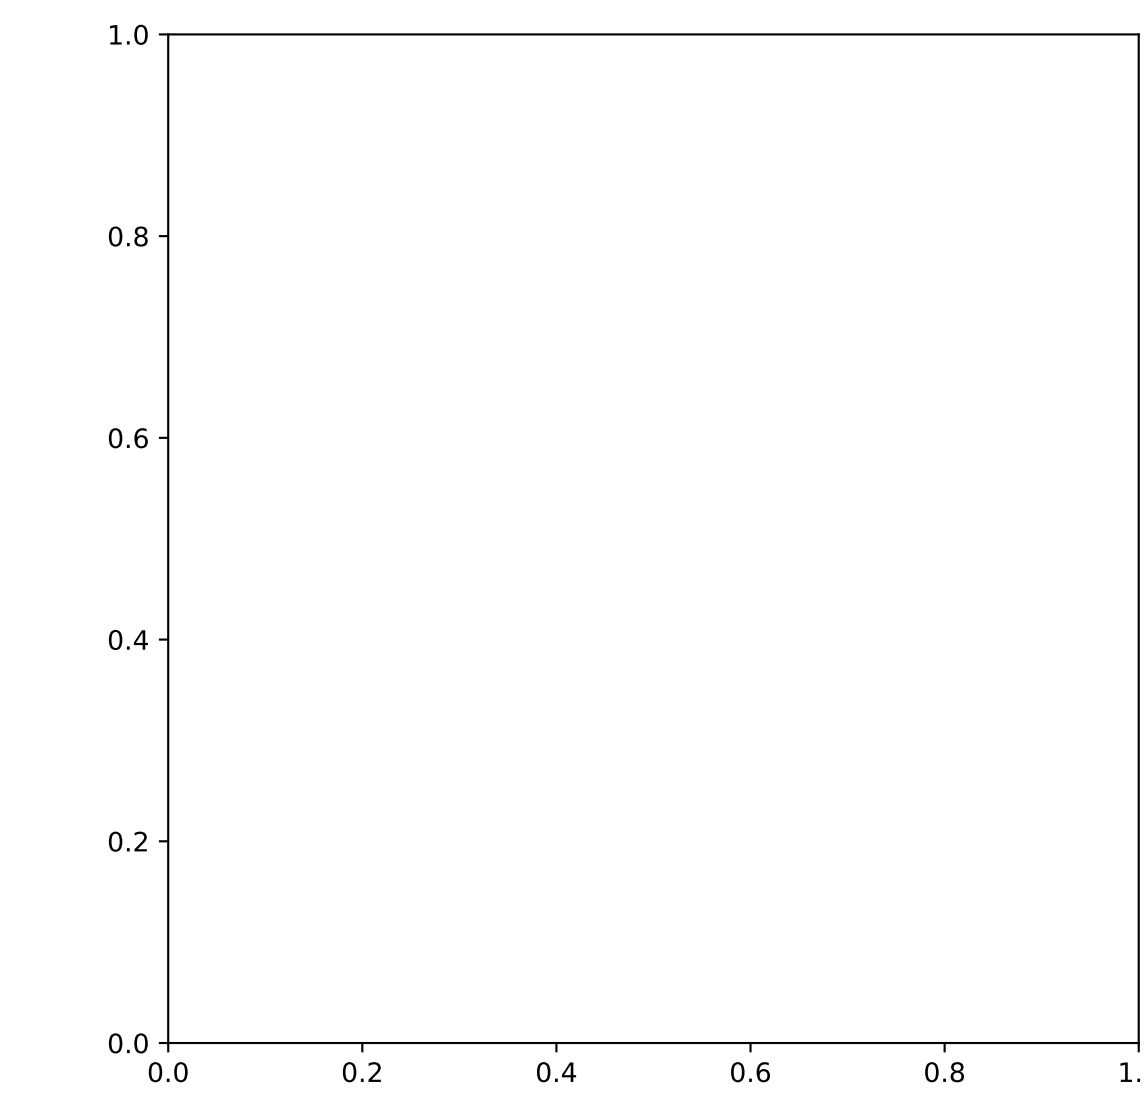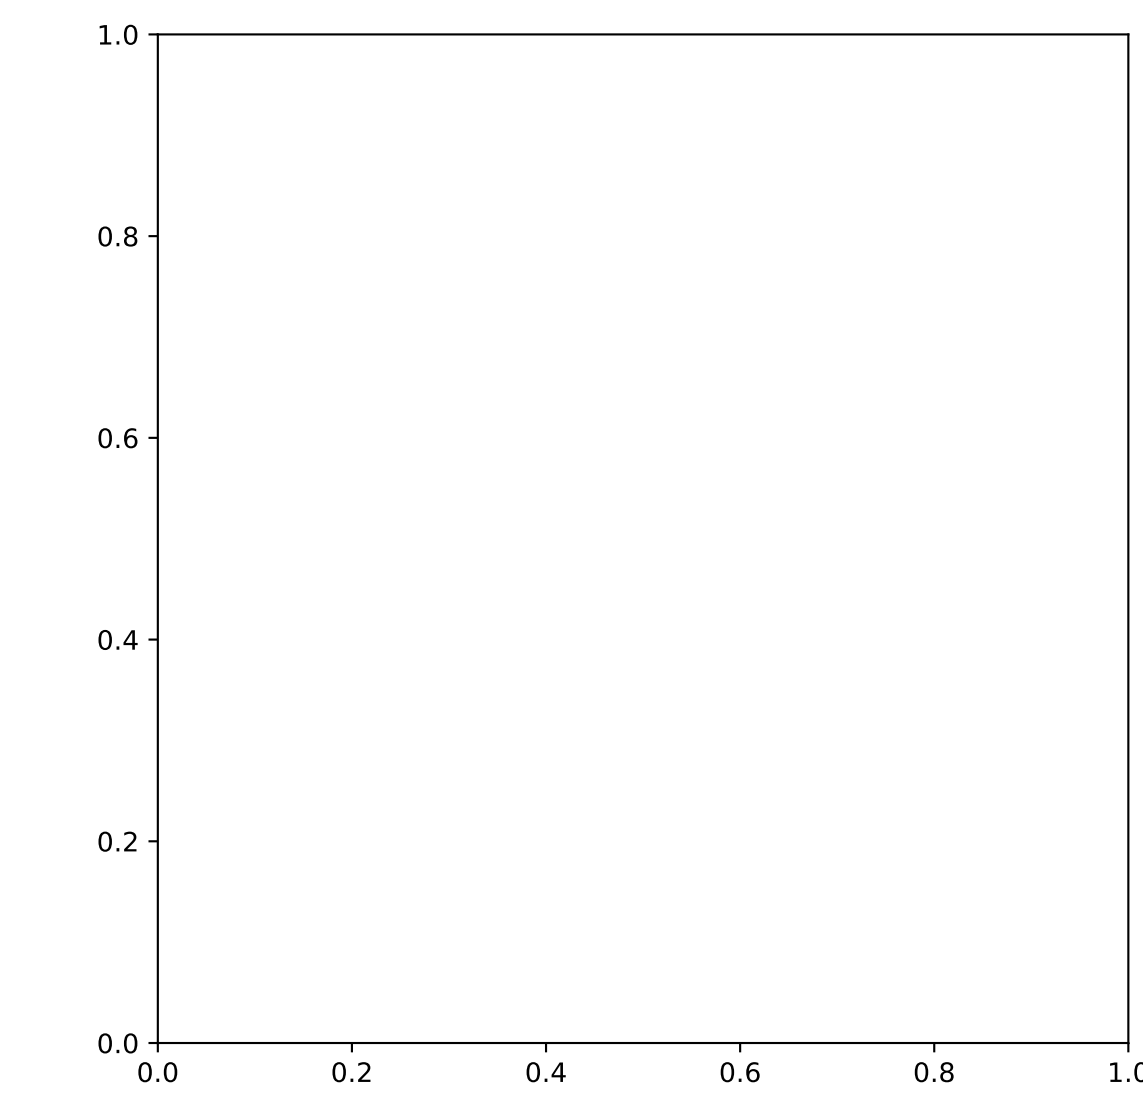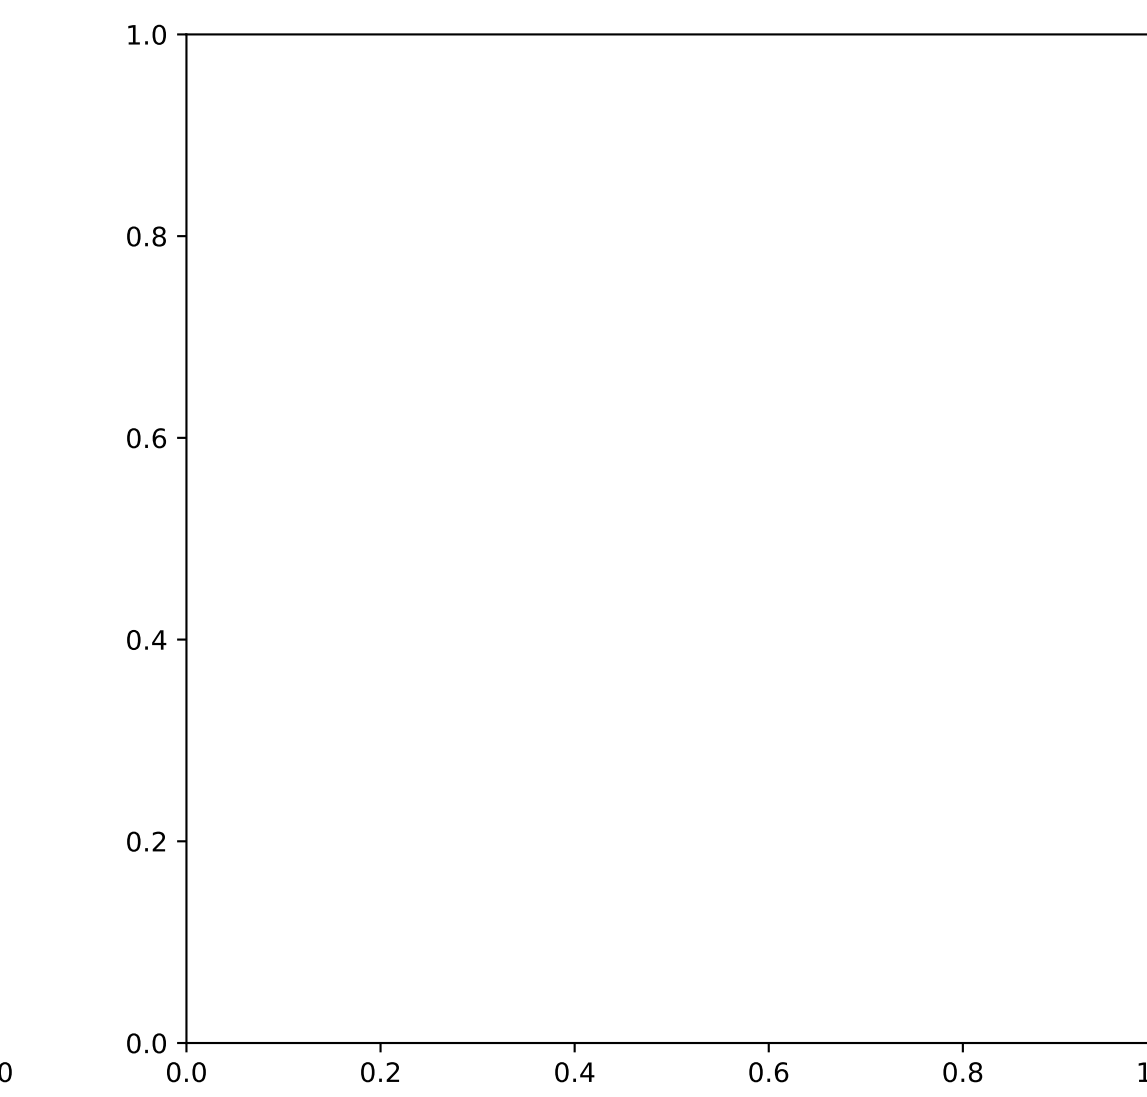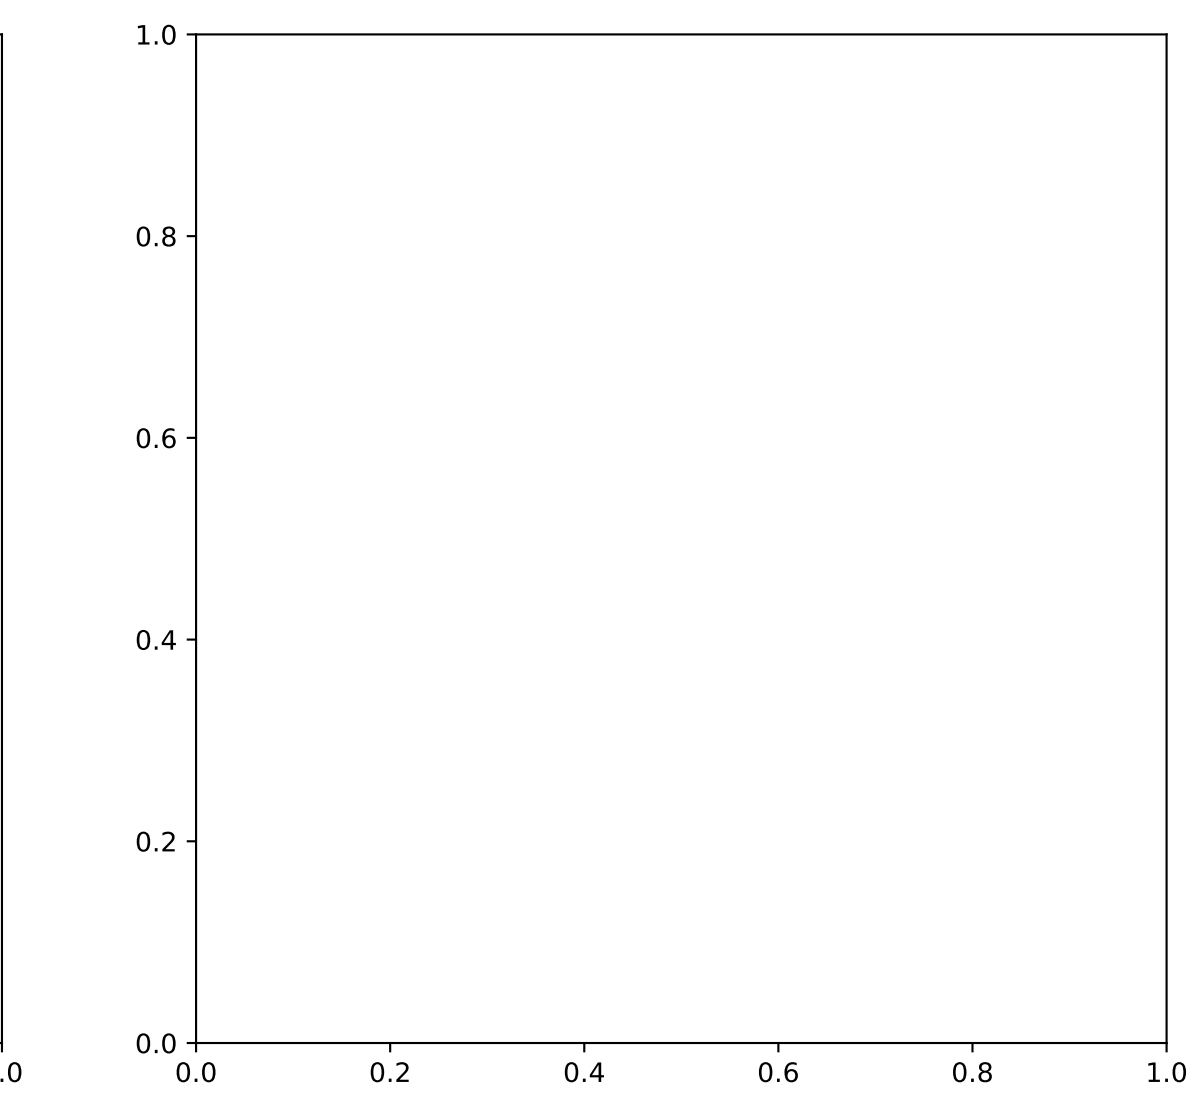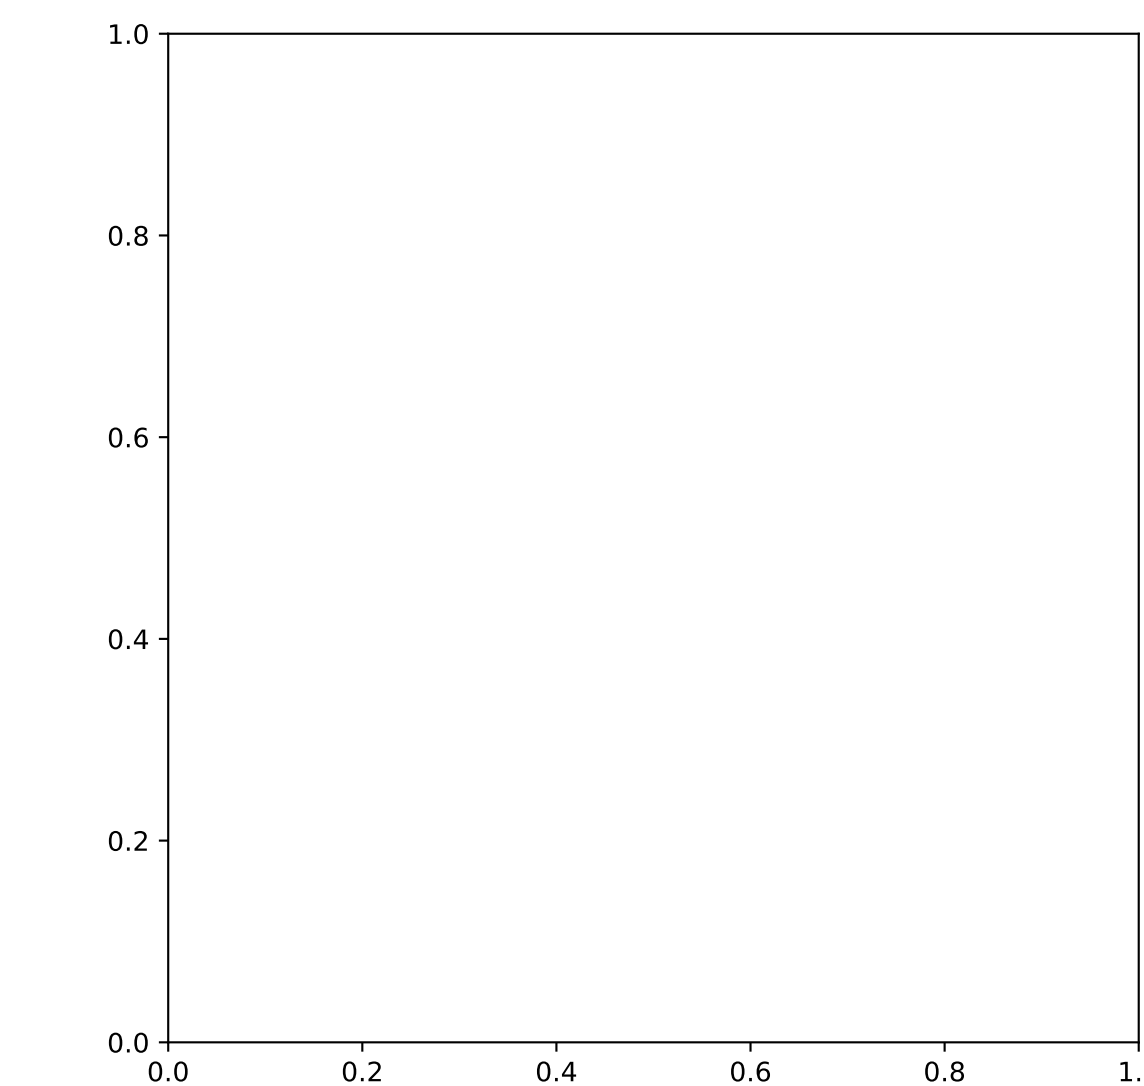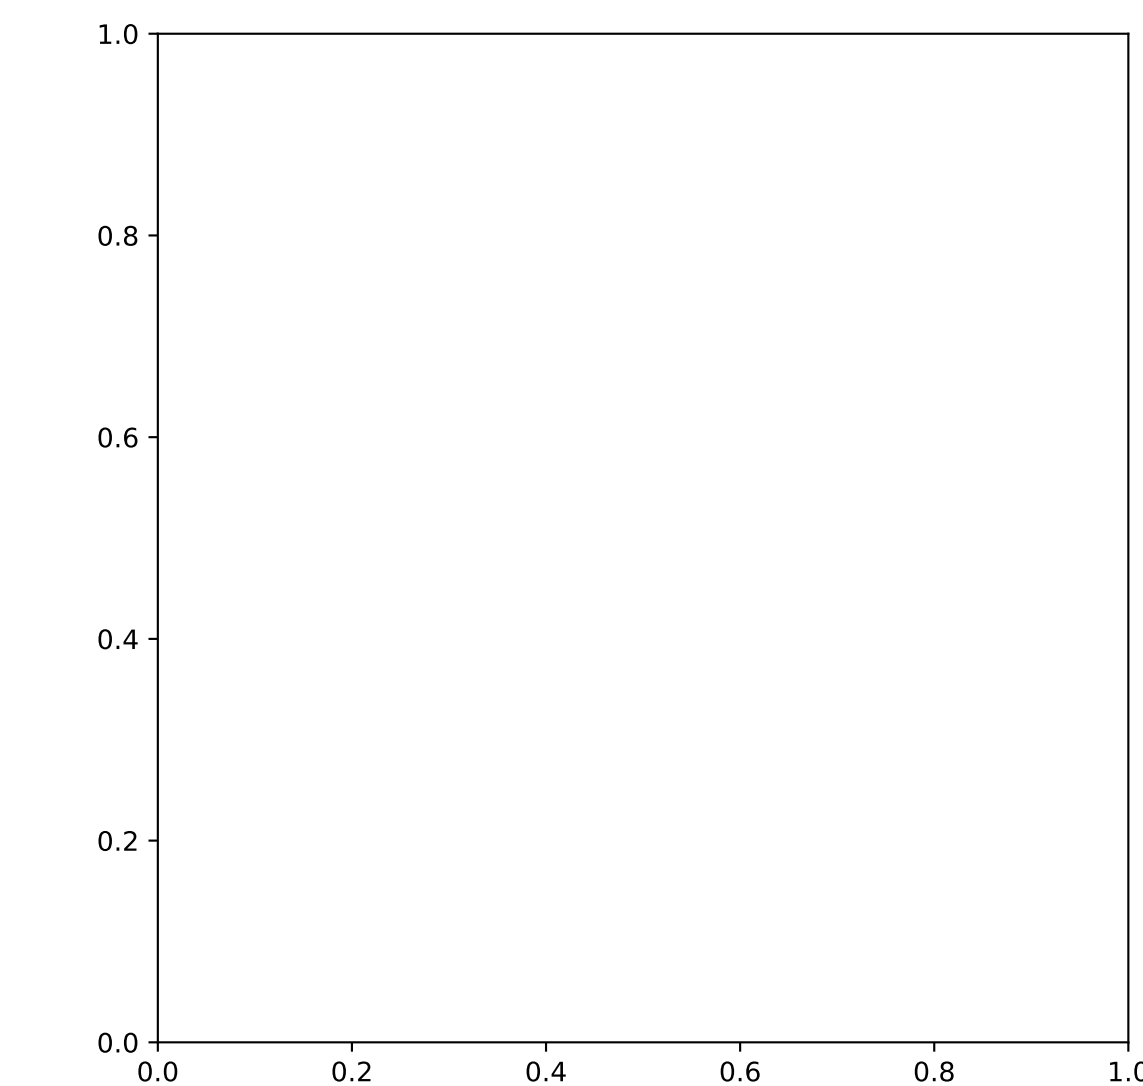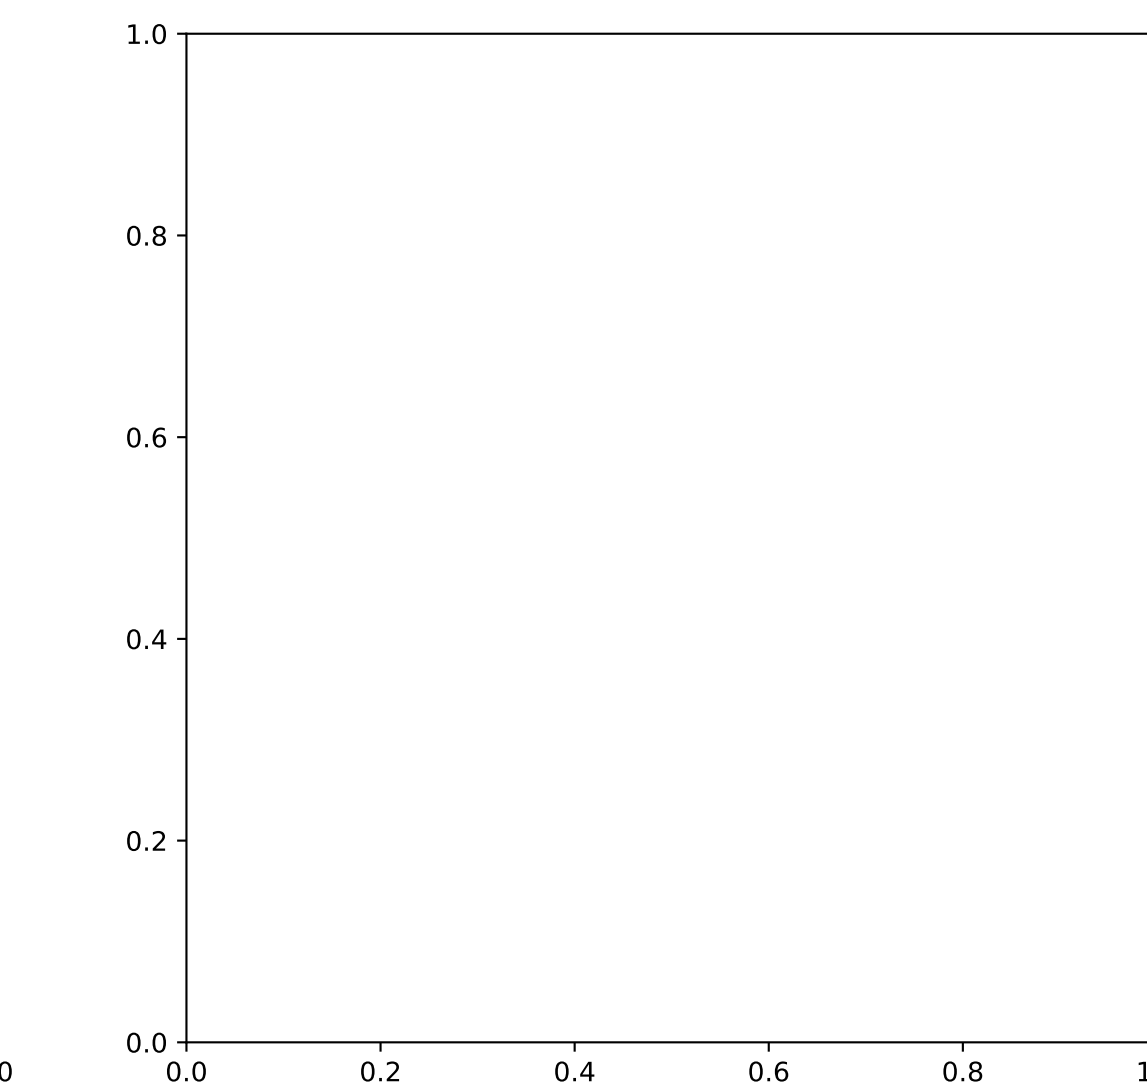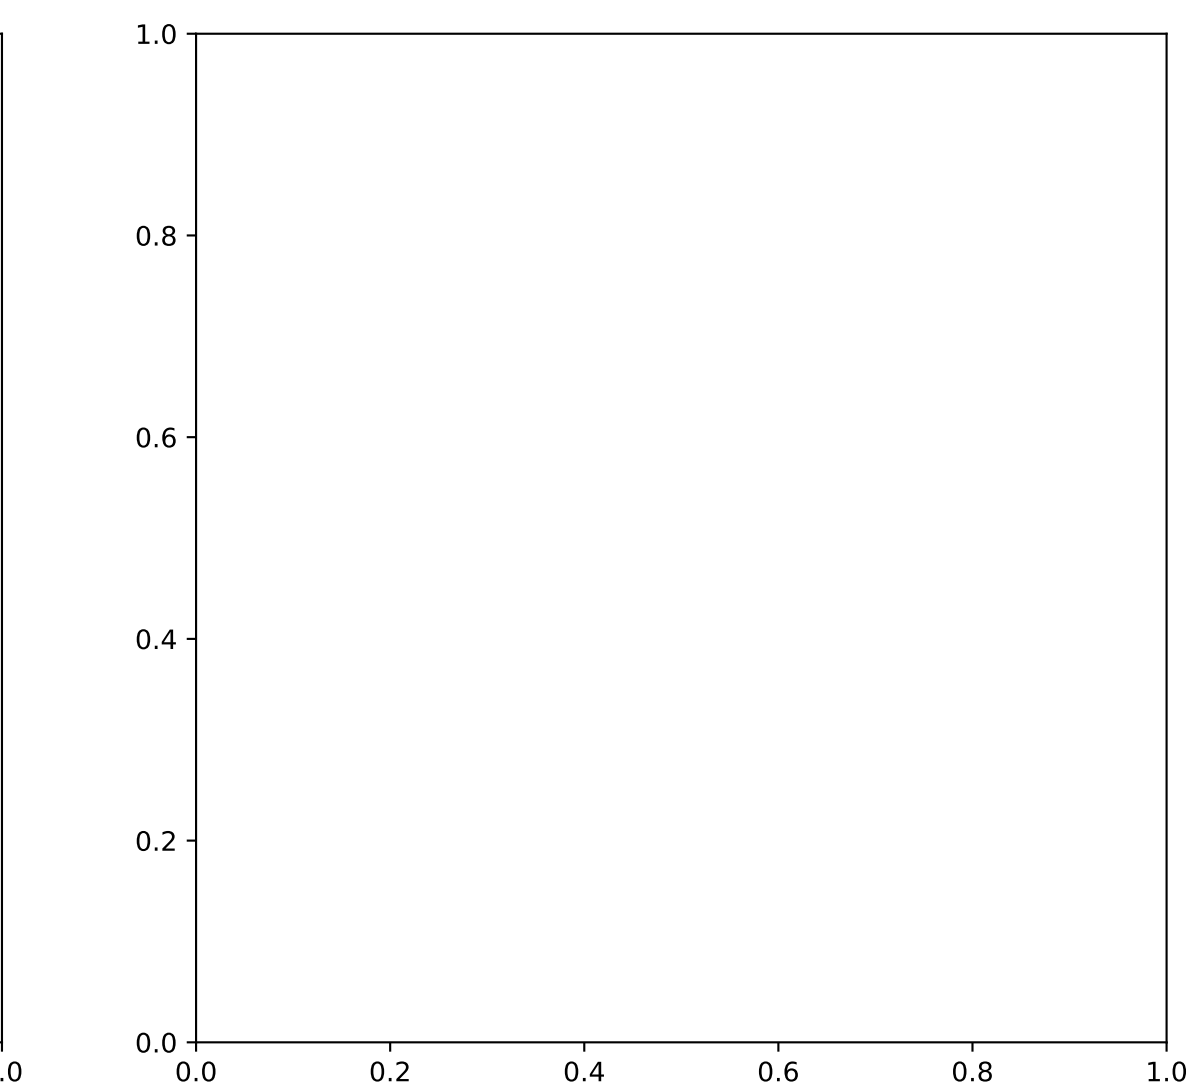

Supplement: supplementary_material [file attachment]

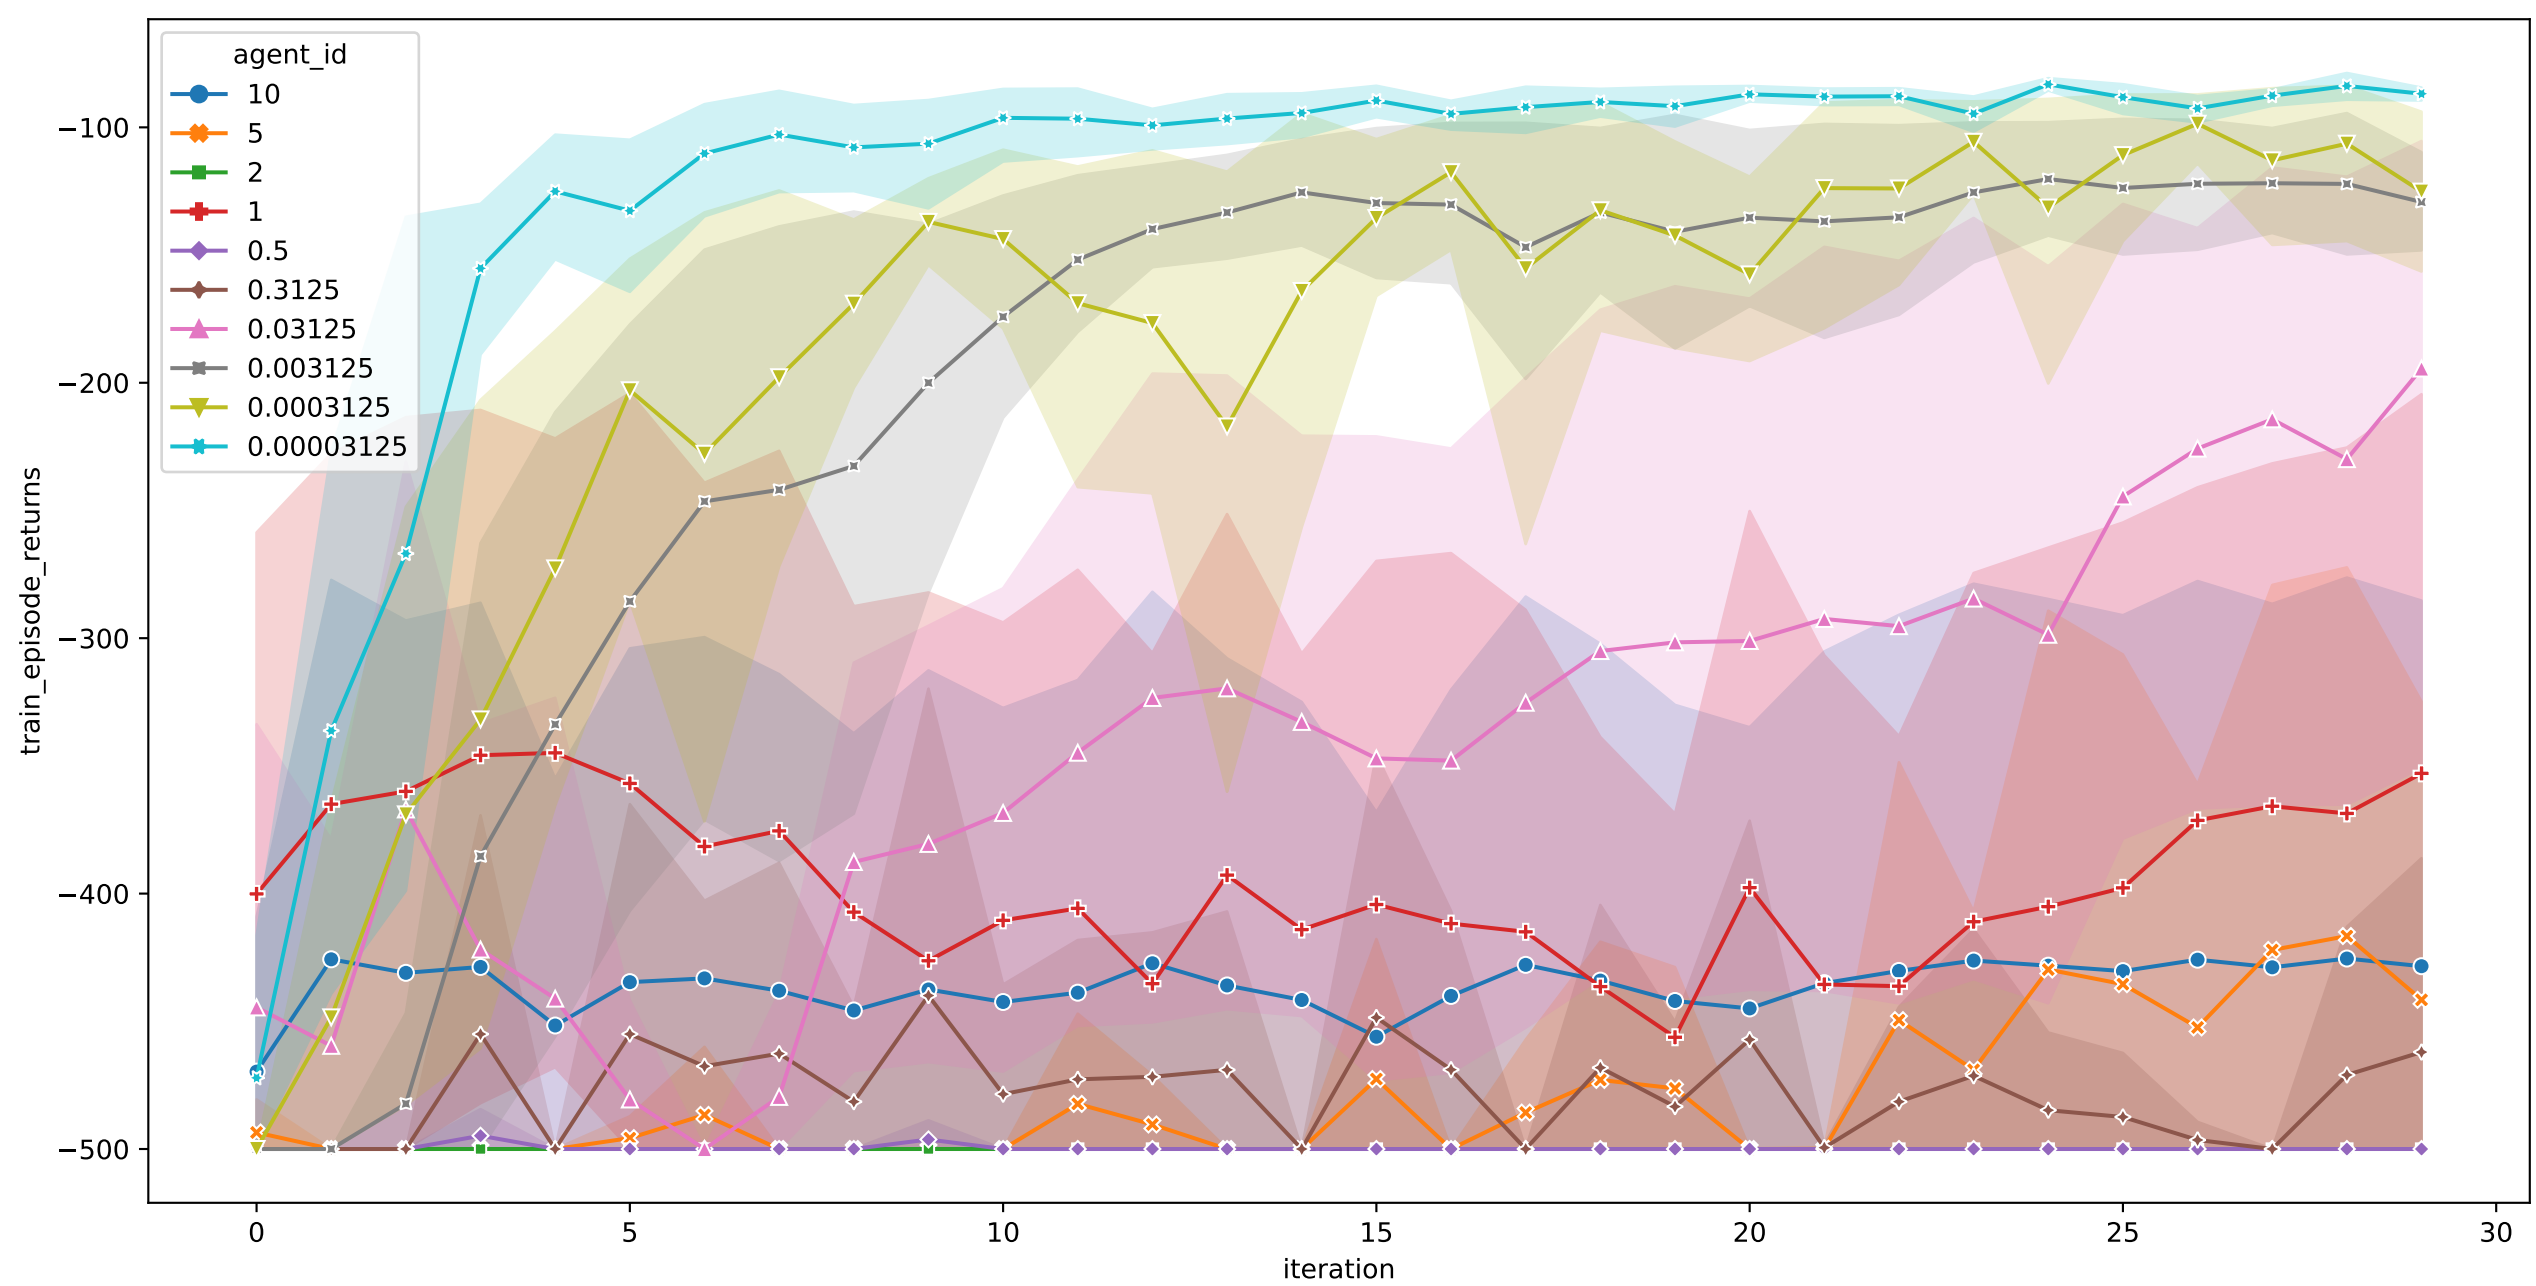

Supplement: supplementary_material [file attachment]

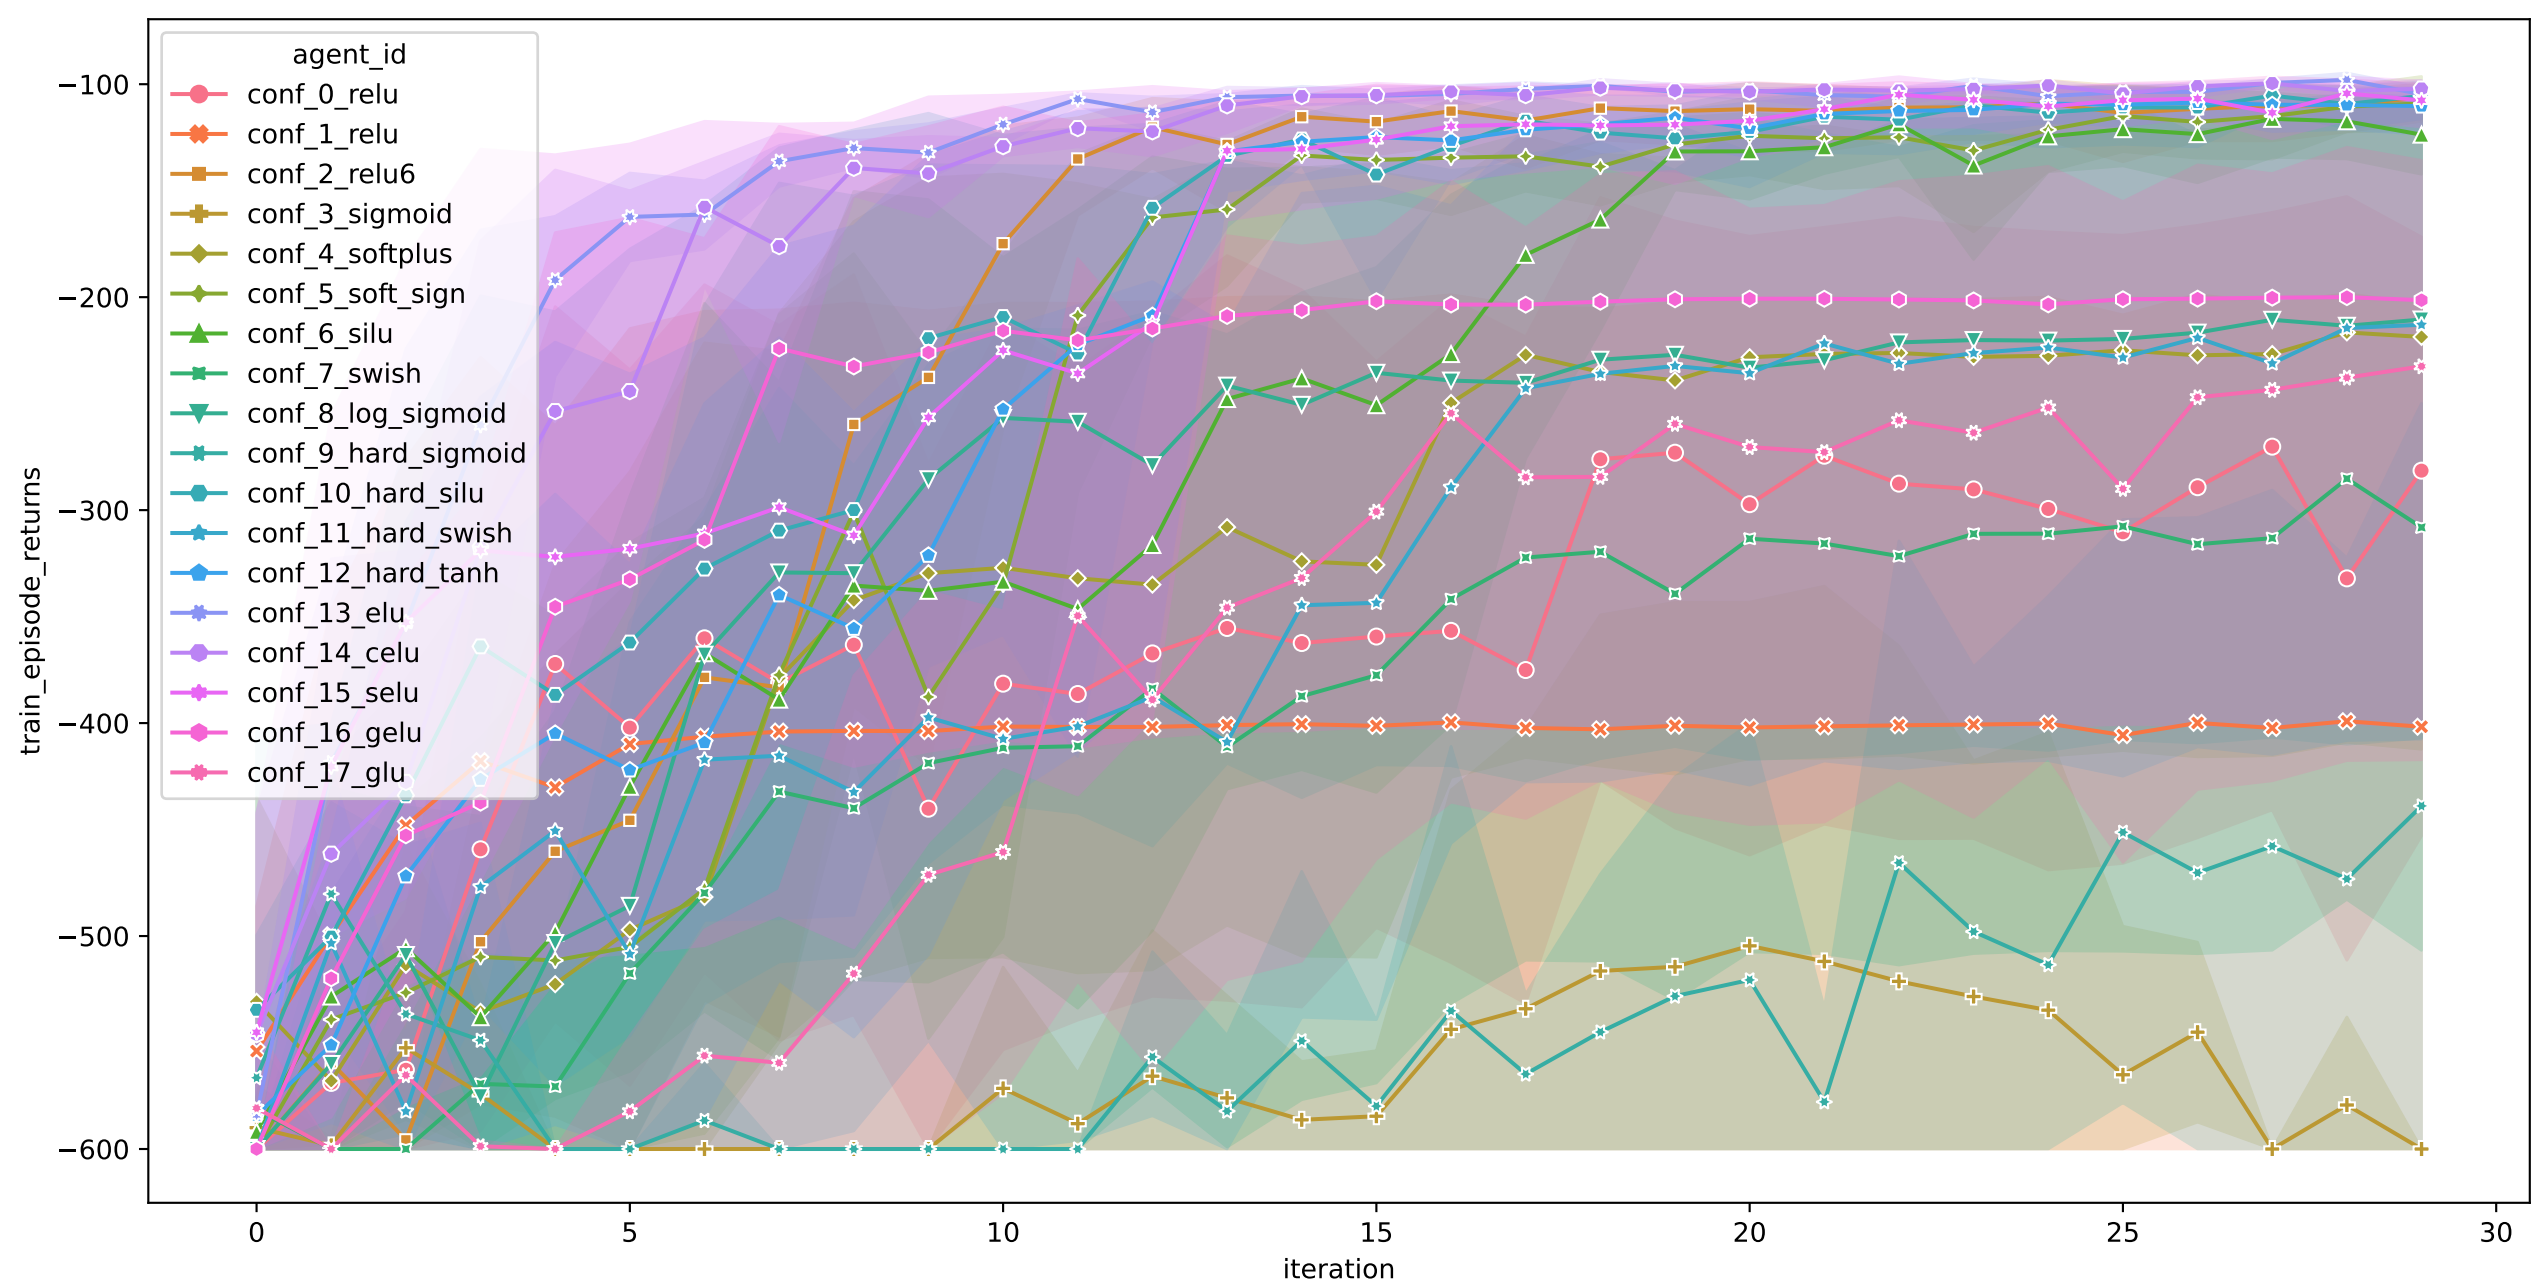

Supplement: supplementary_material [file attachment]

Acrobot

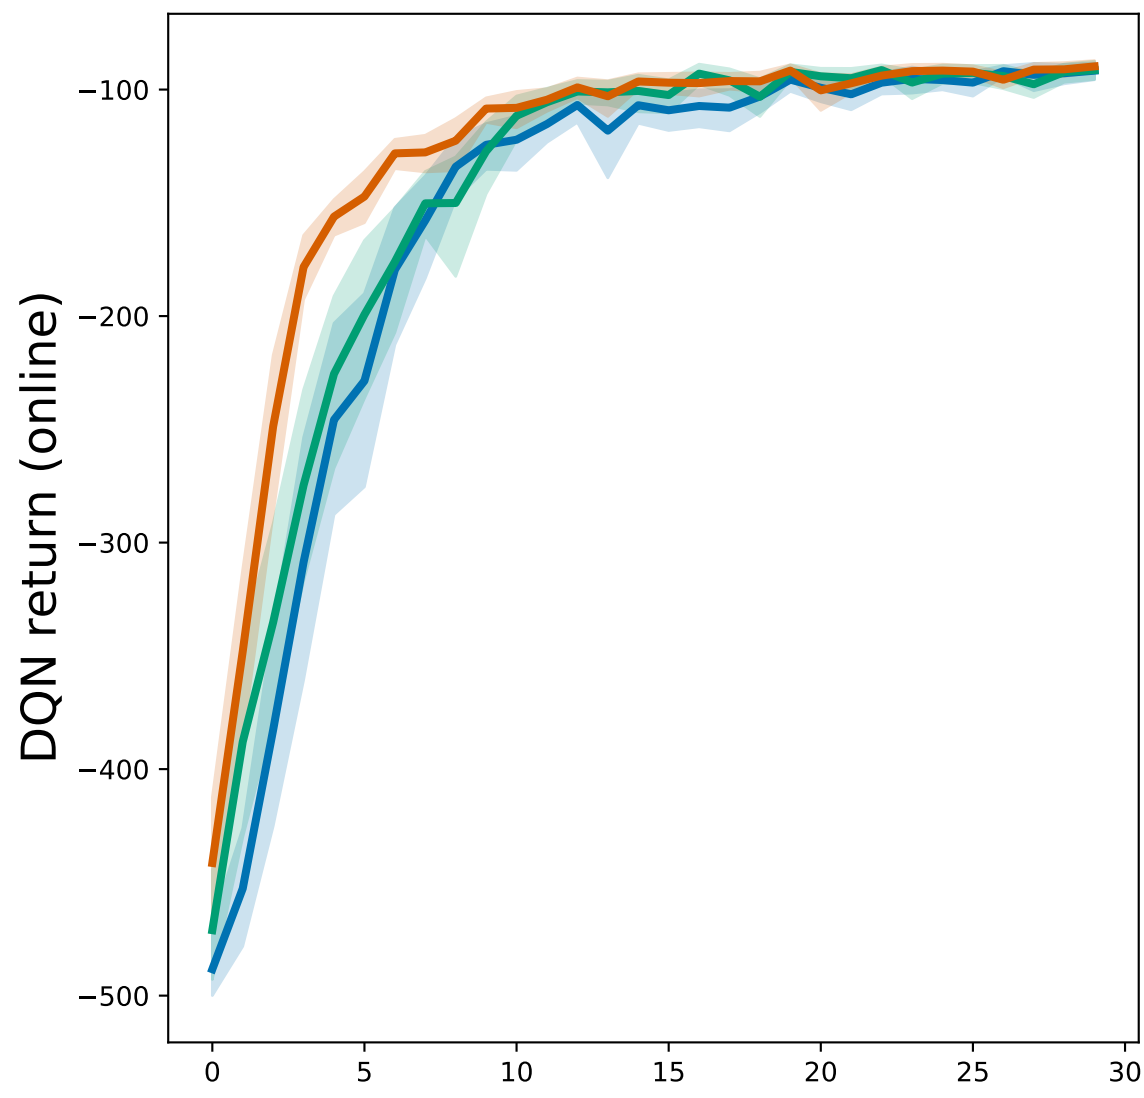

CartPole

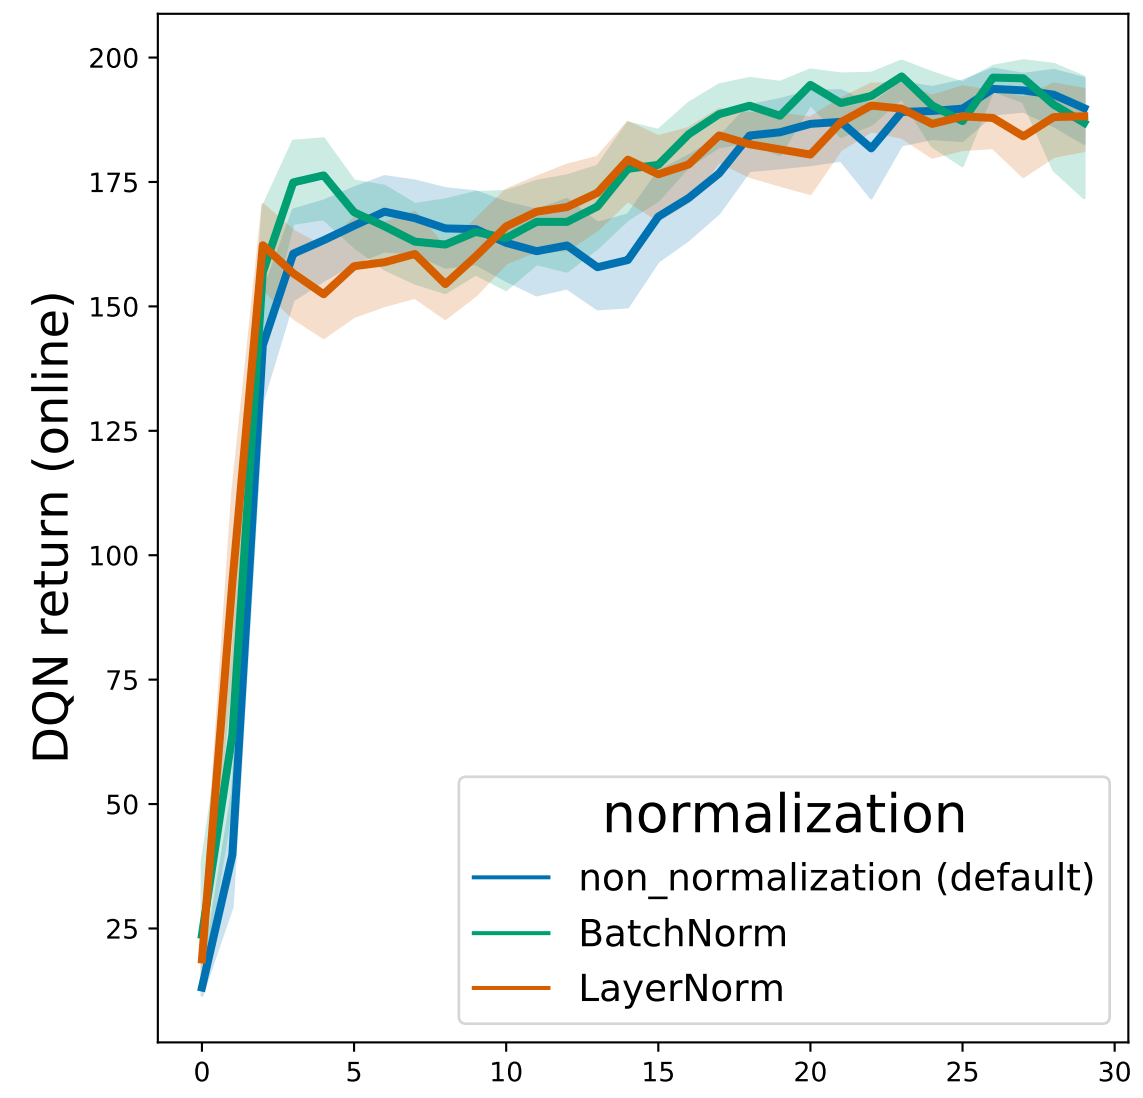

LunarLander

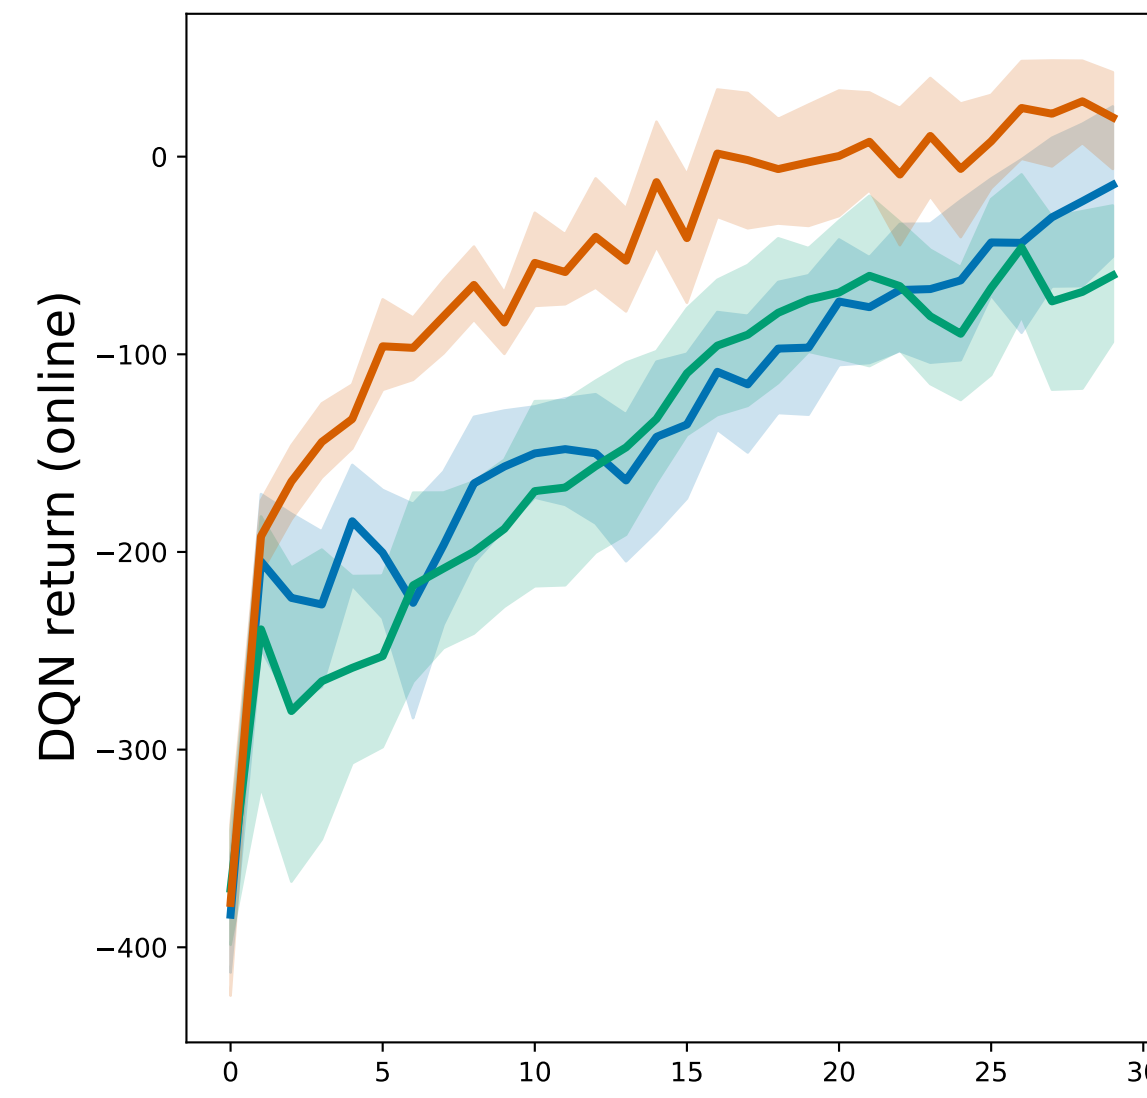

MountainCar

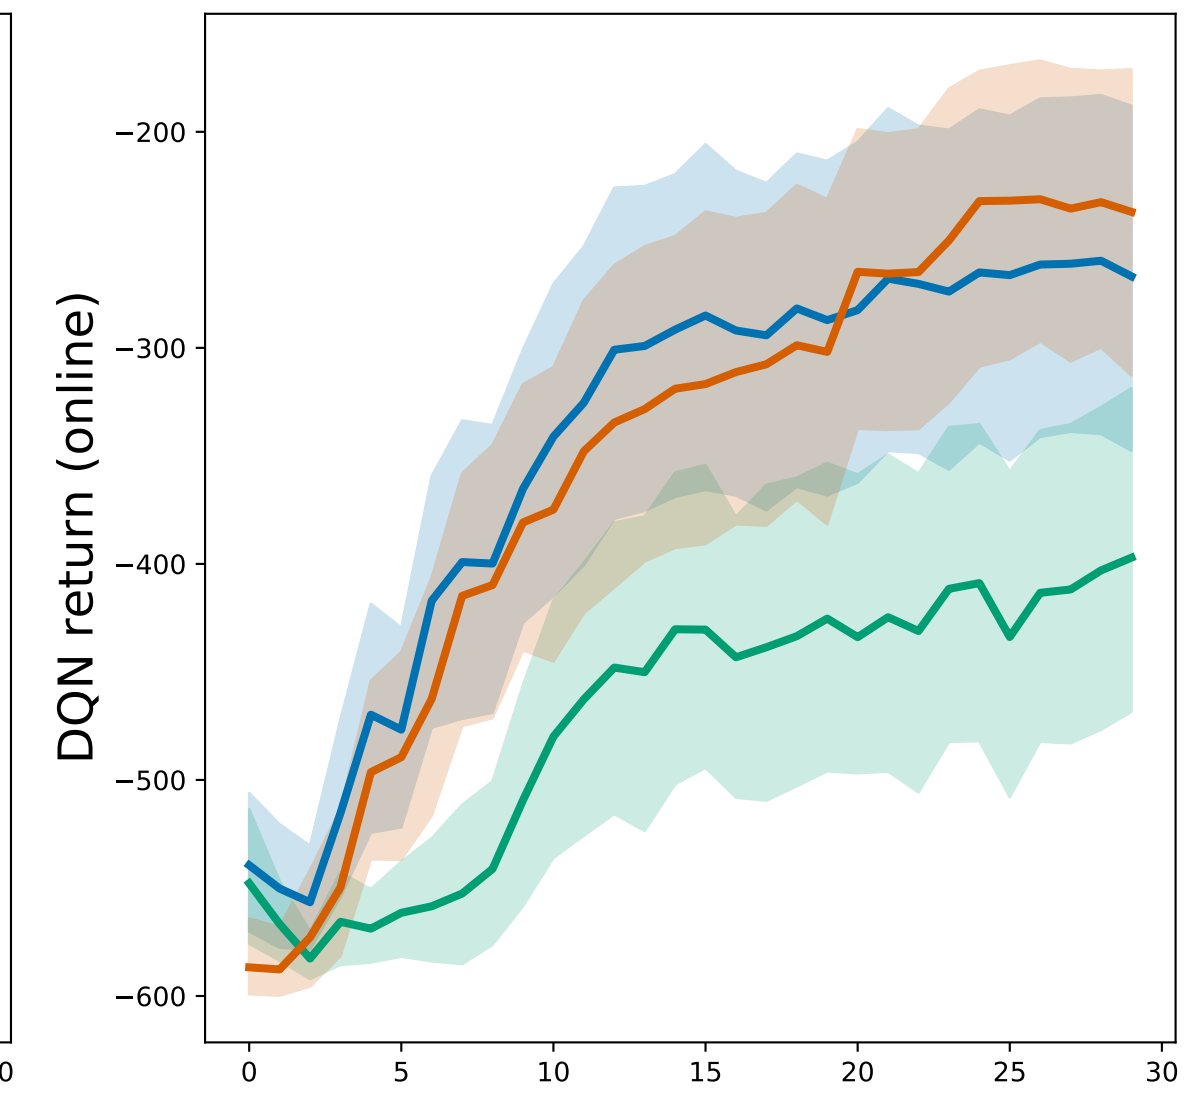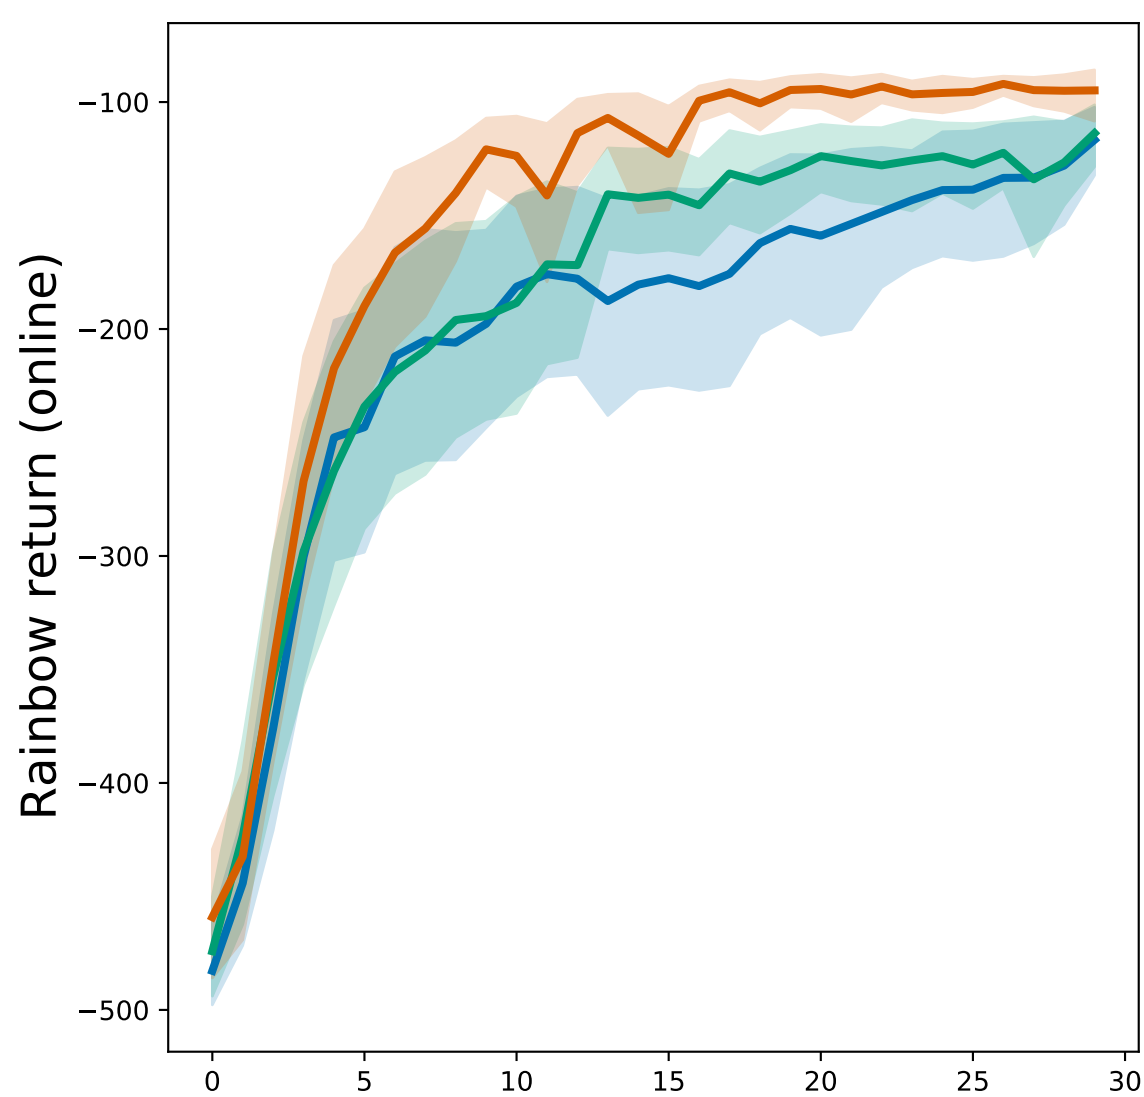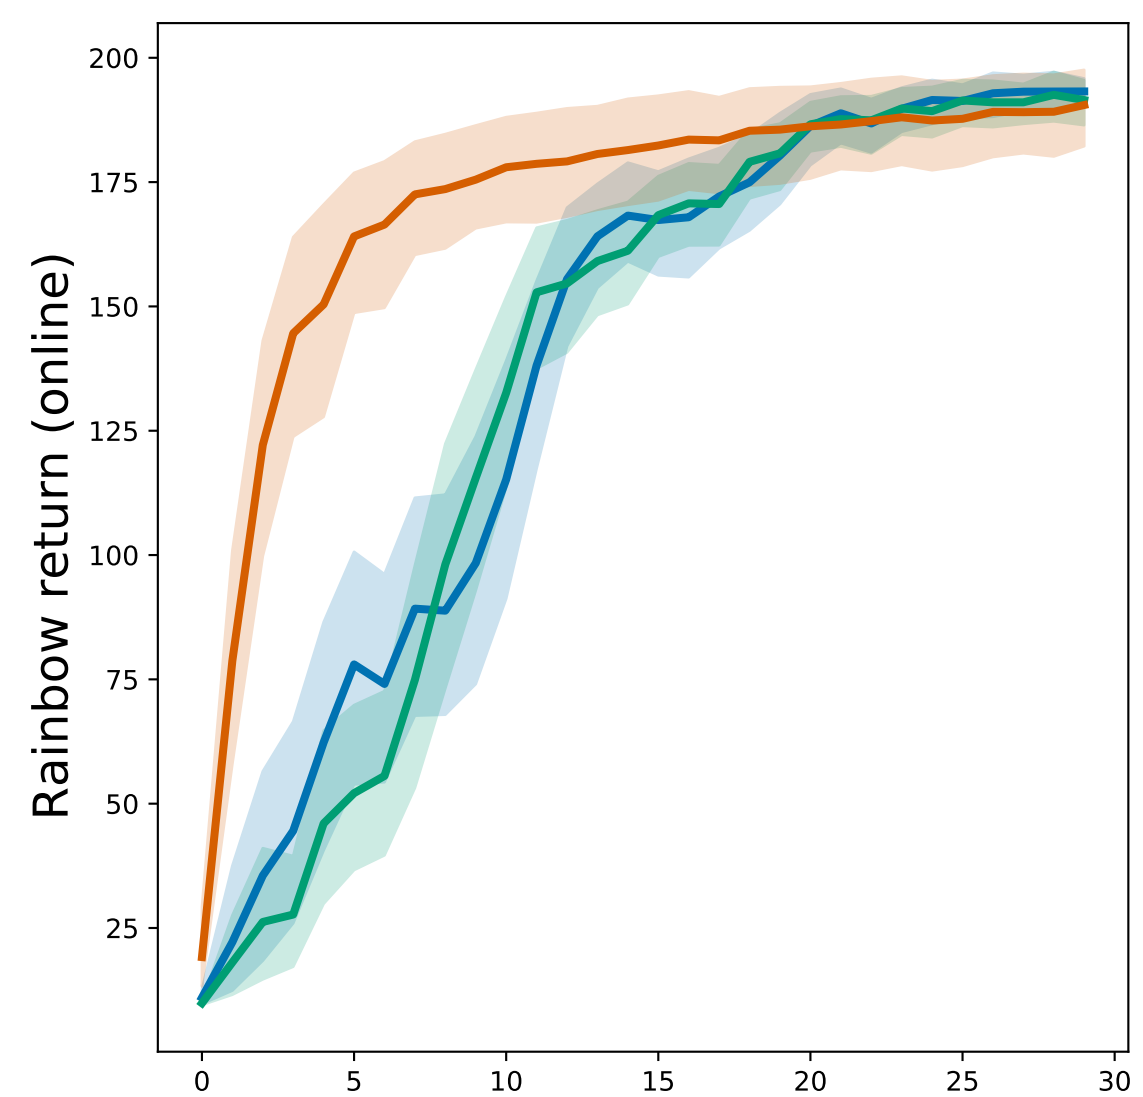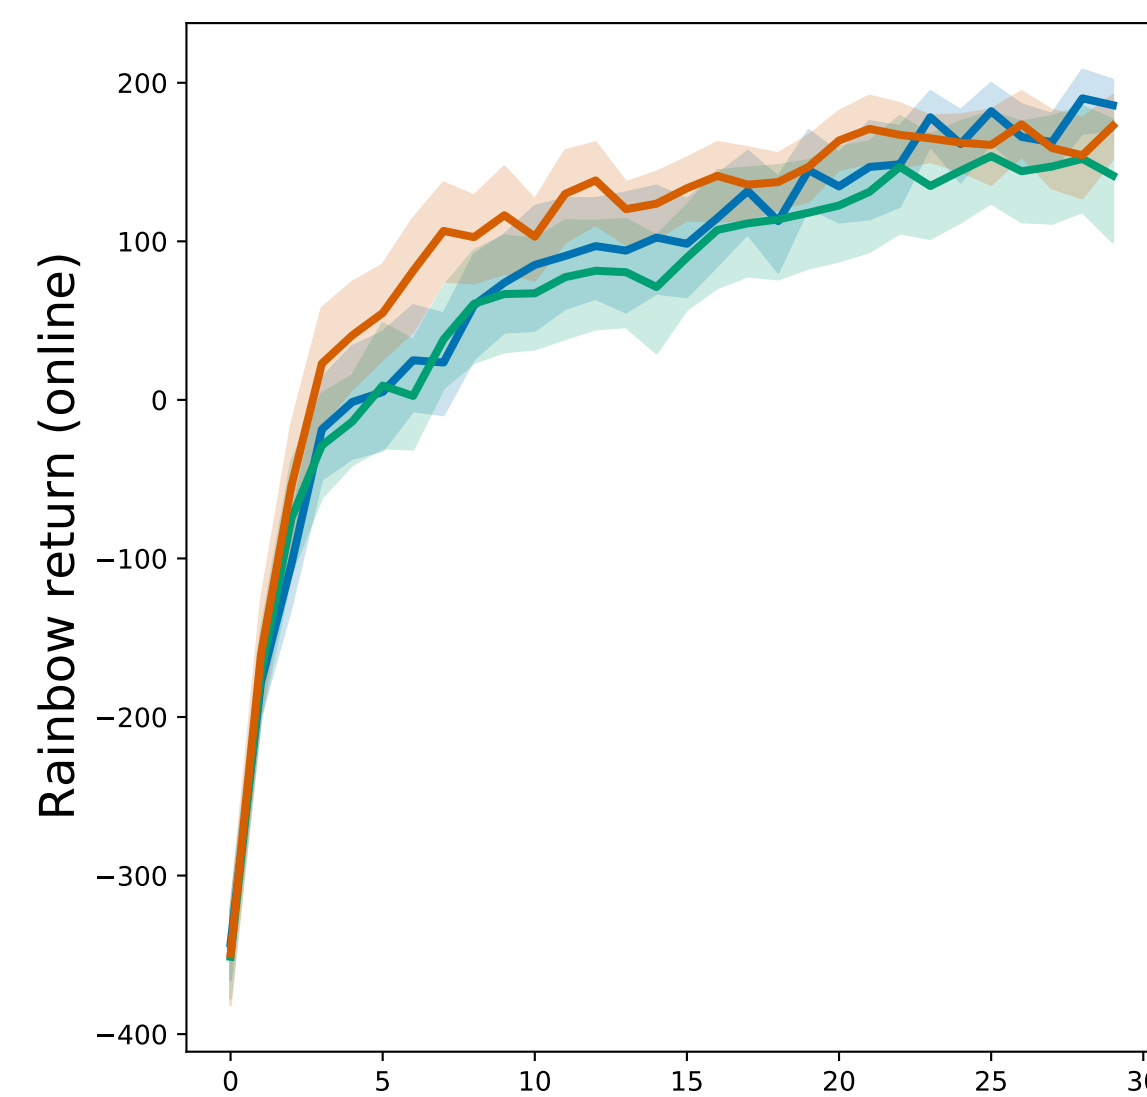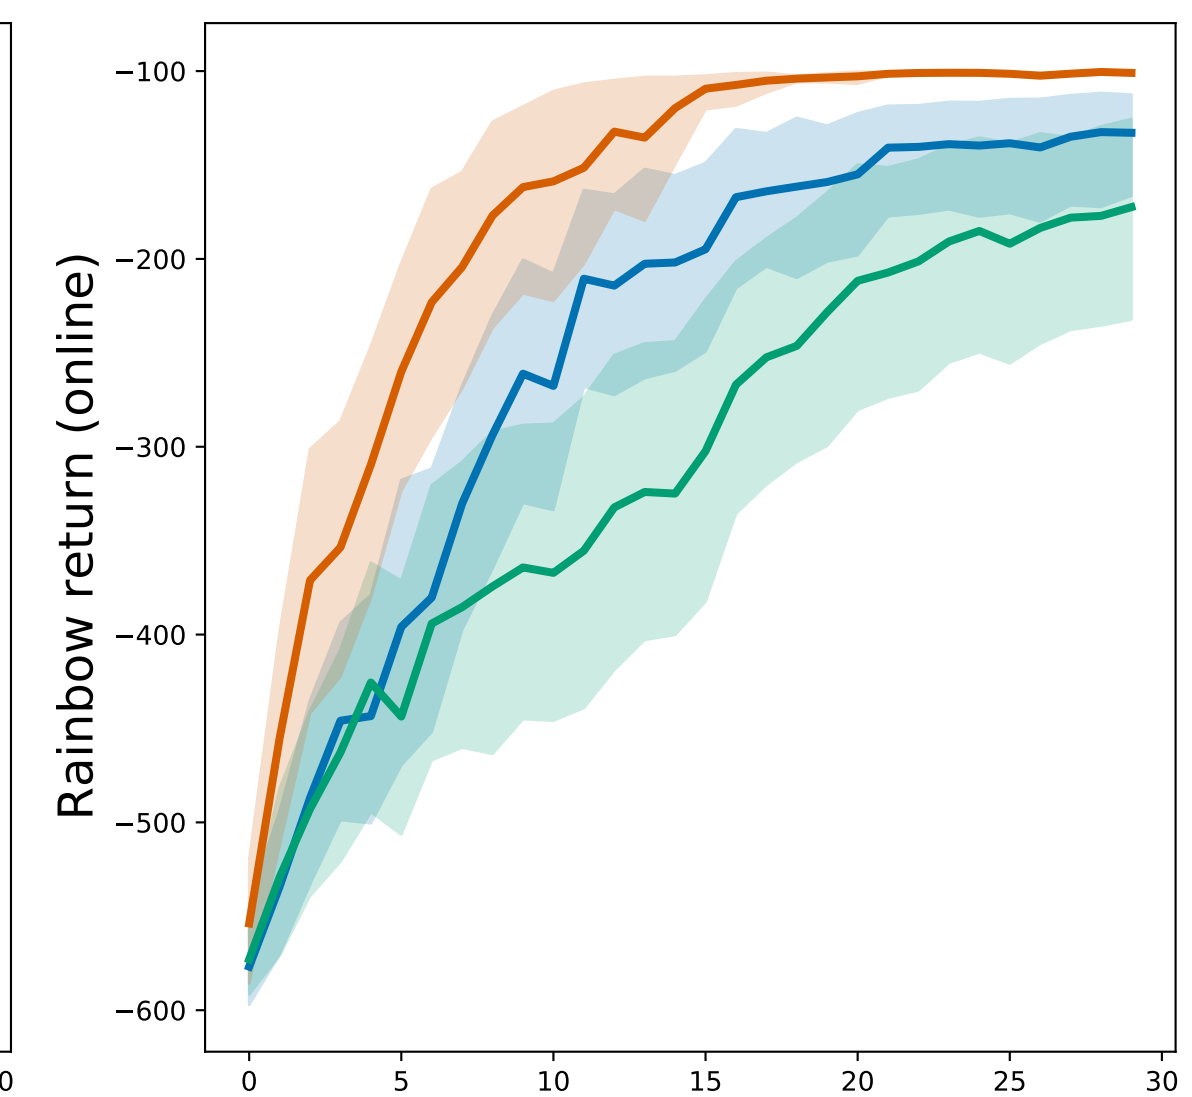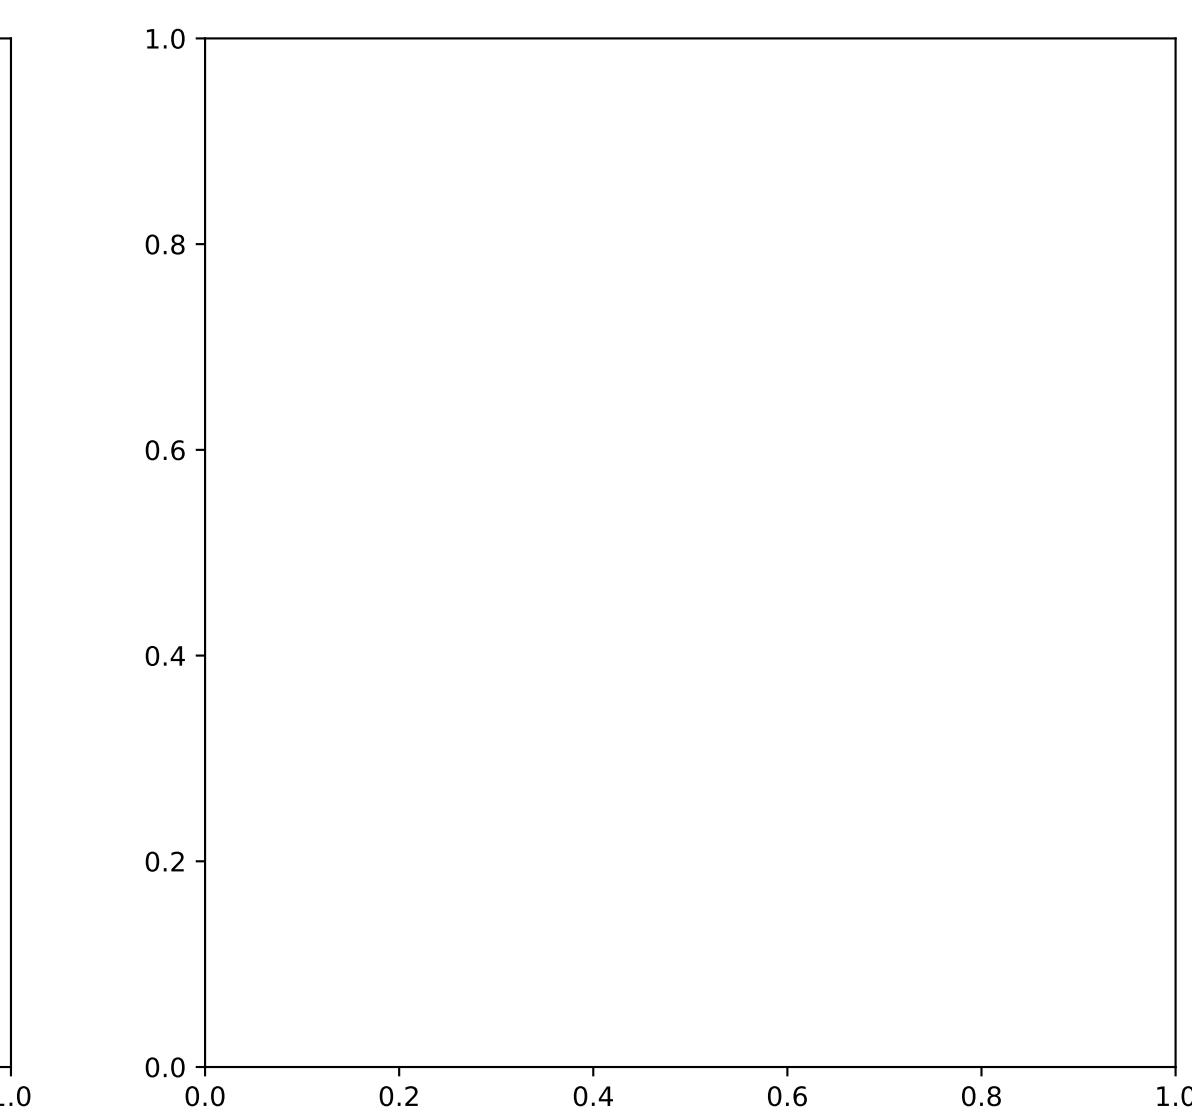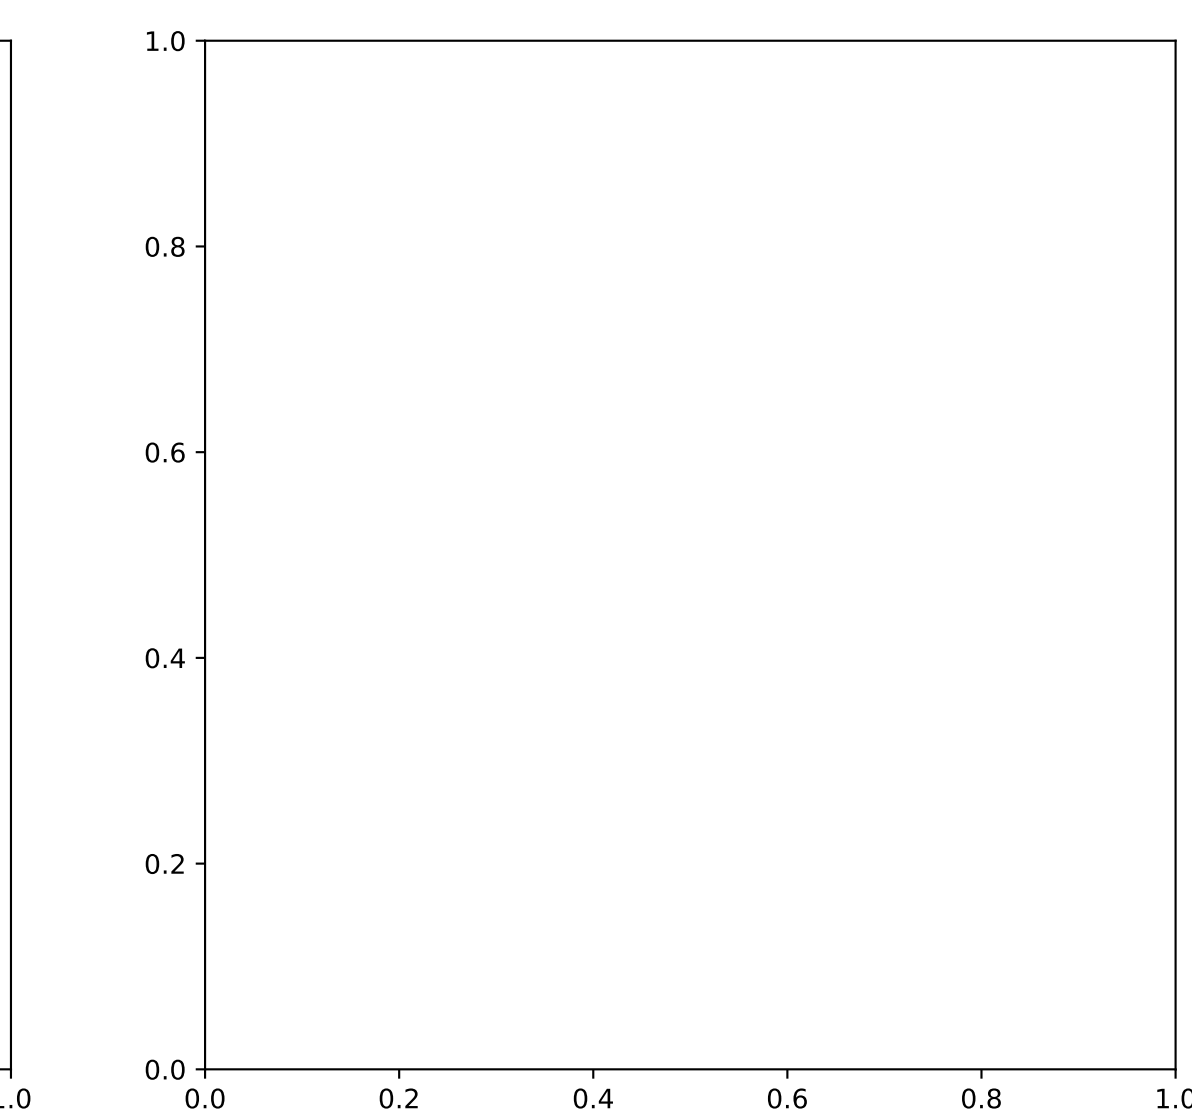

Supplement: supplementary_material [file attachment]

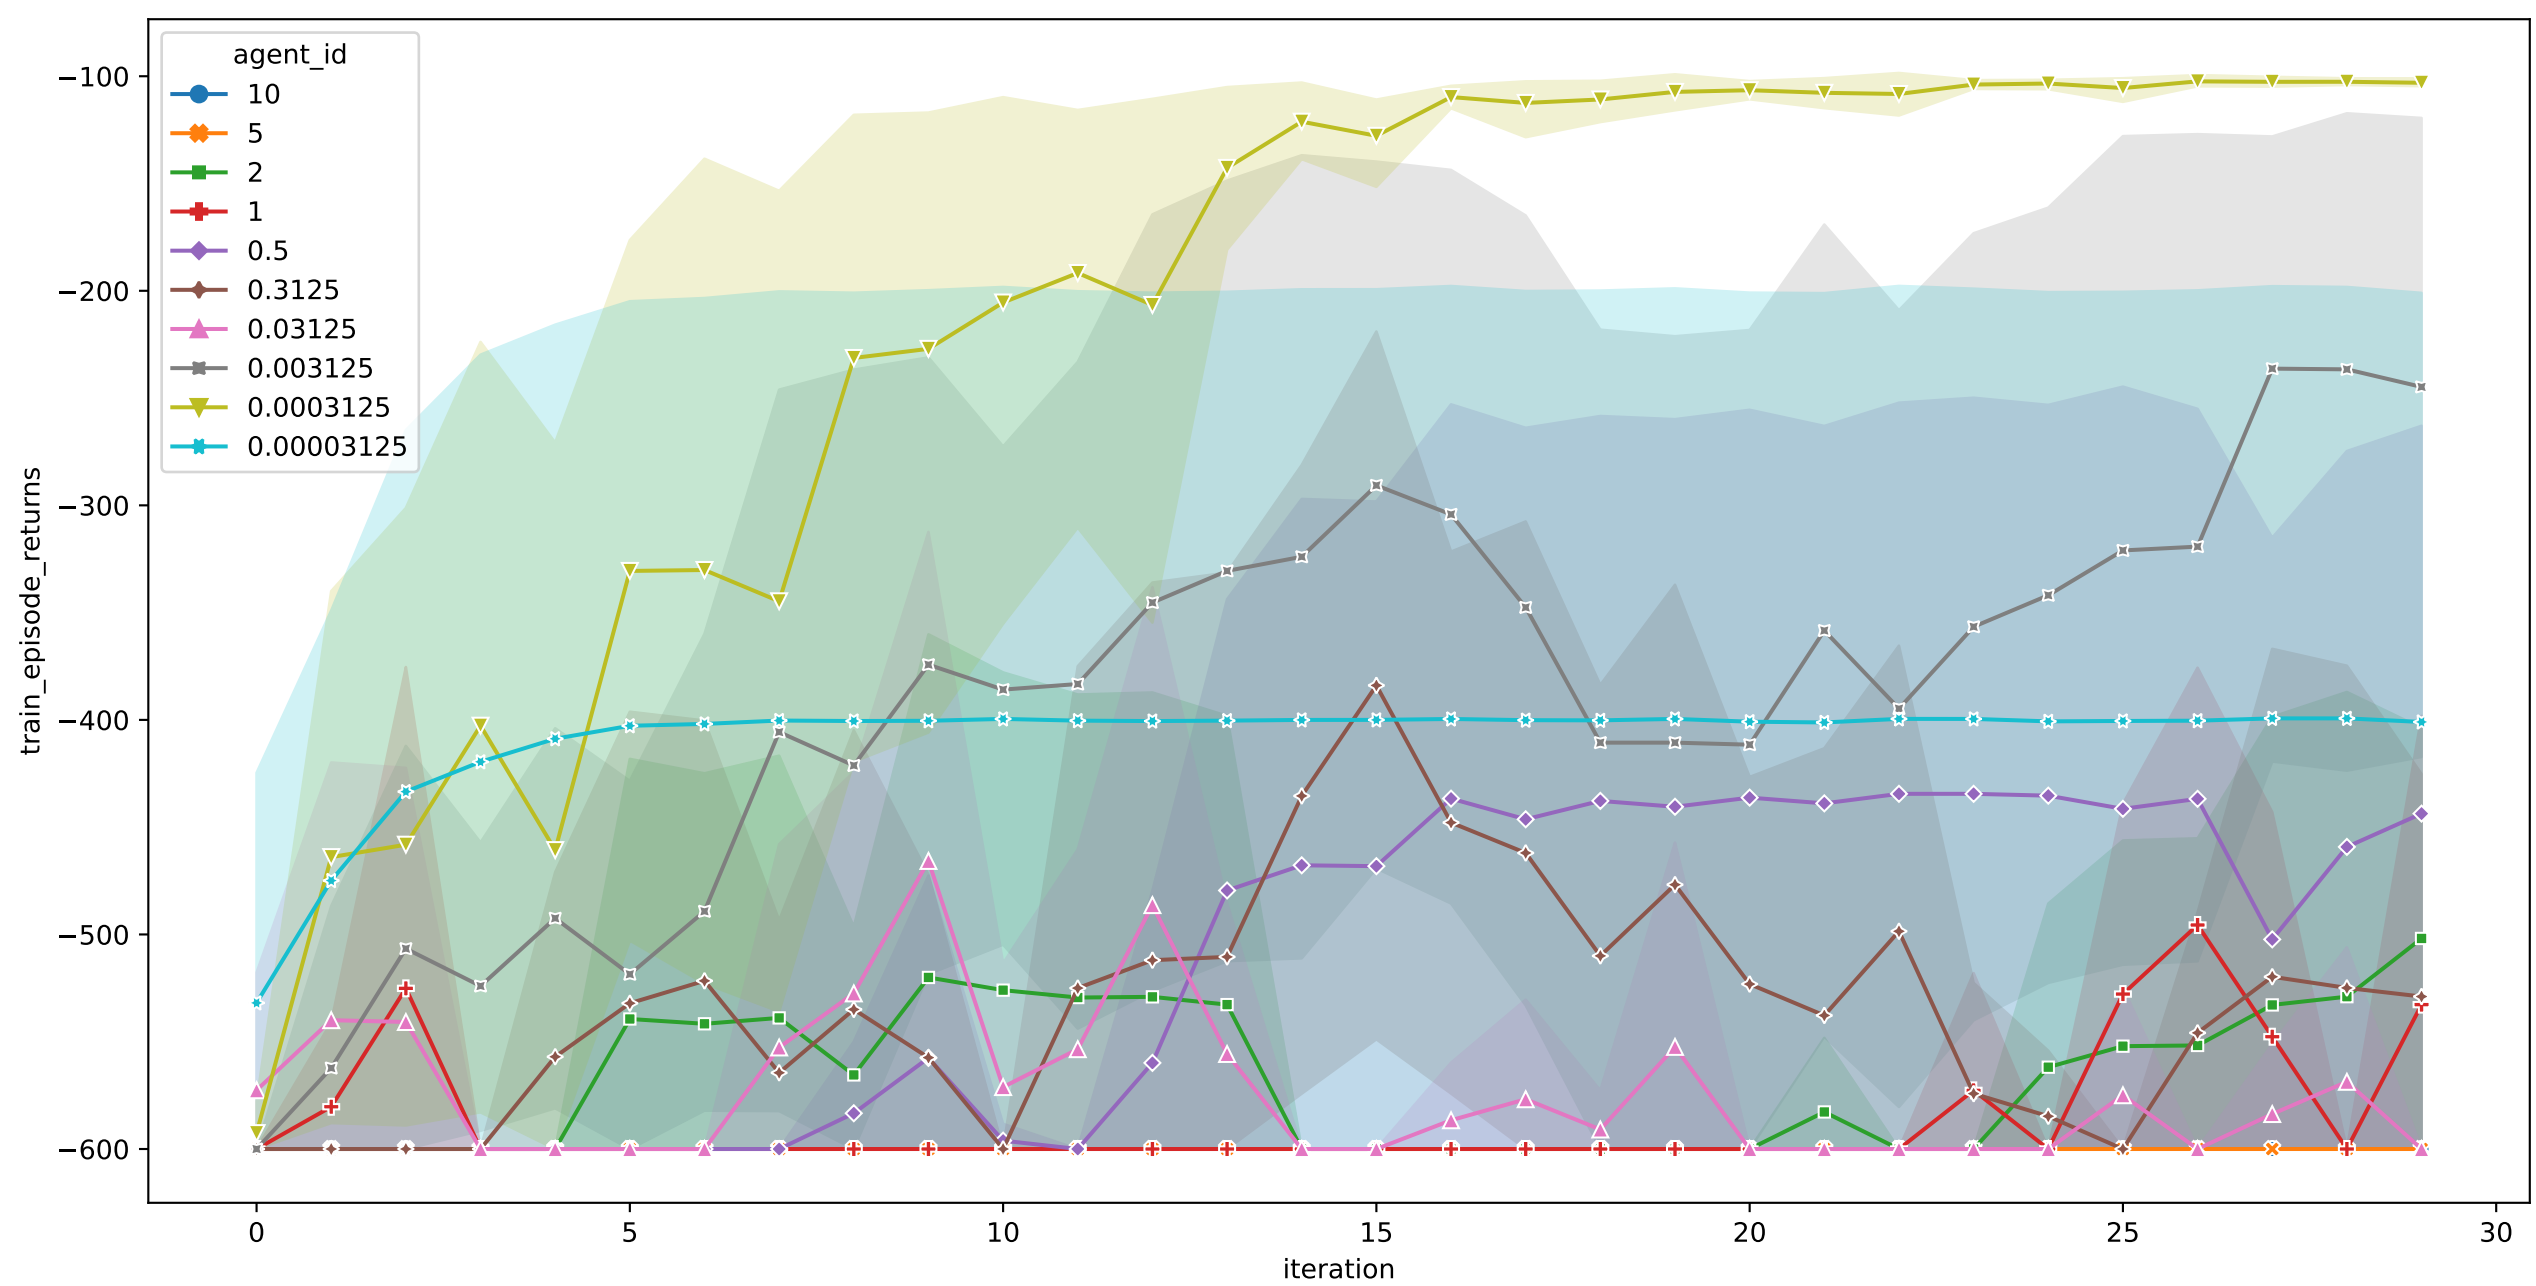

Supplement: supplementary_material [file attachment]

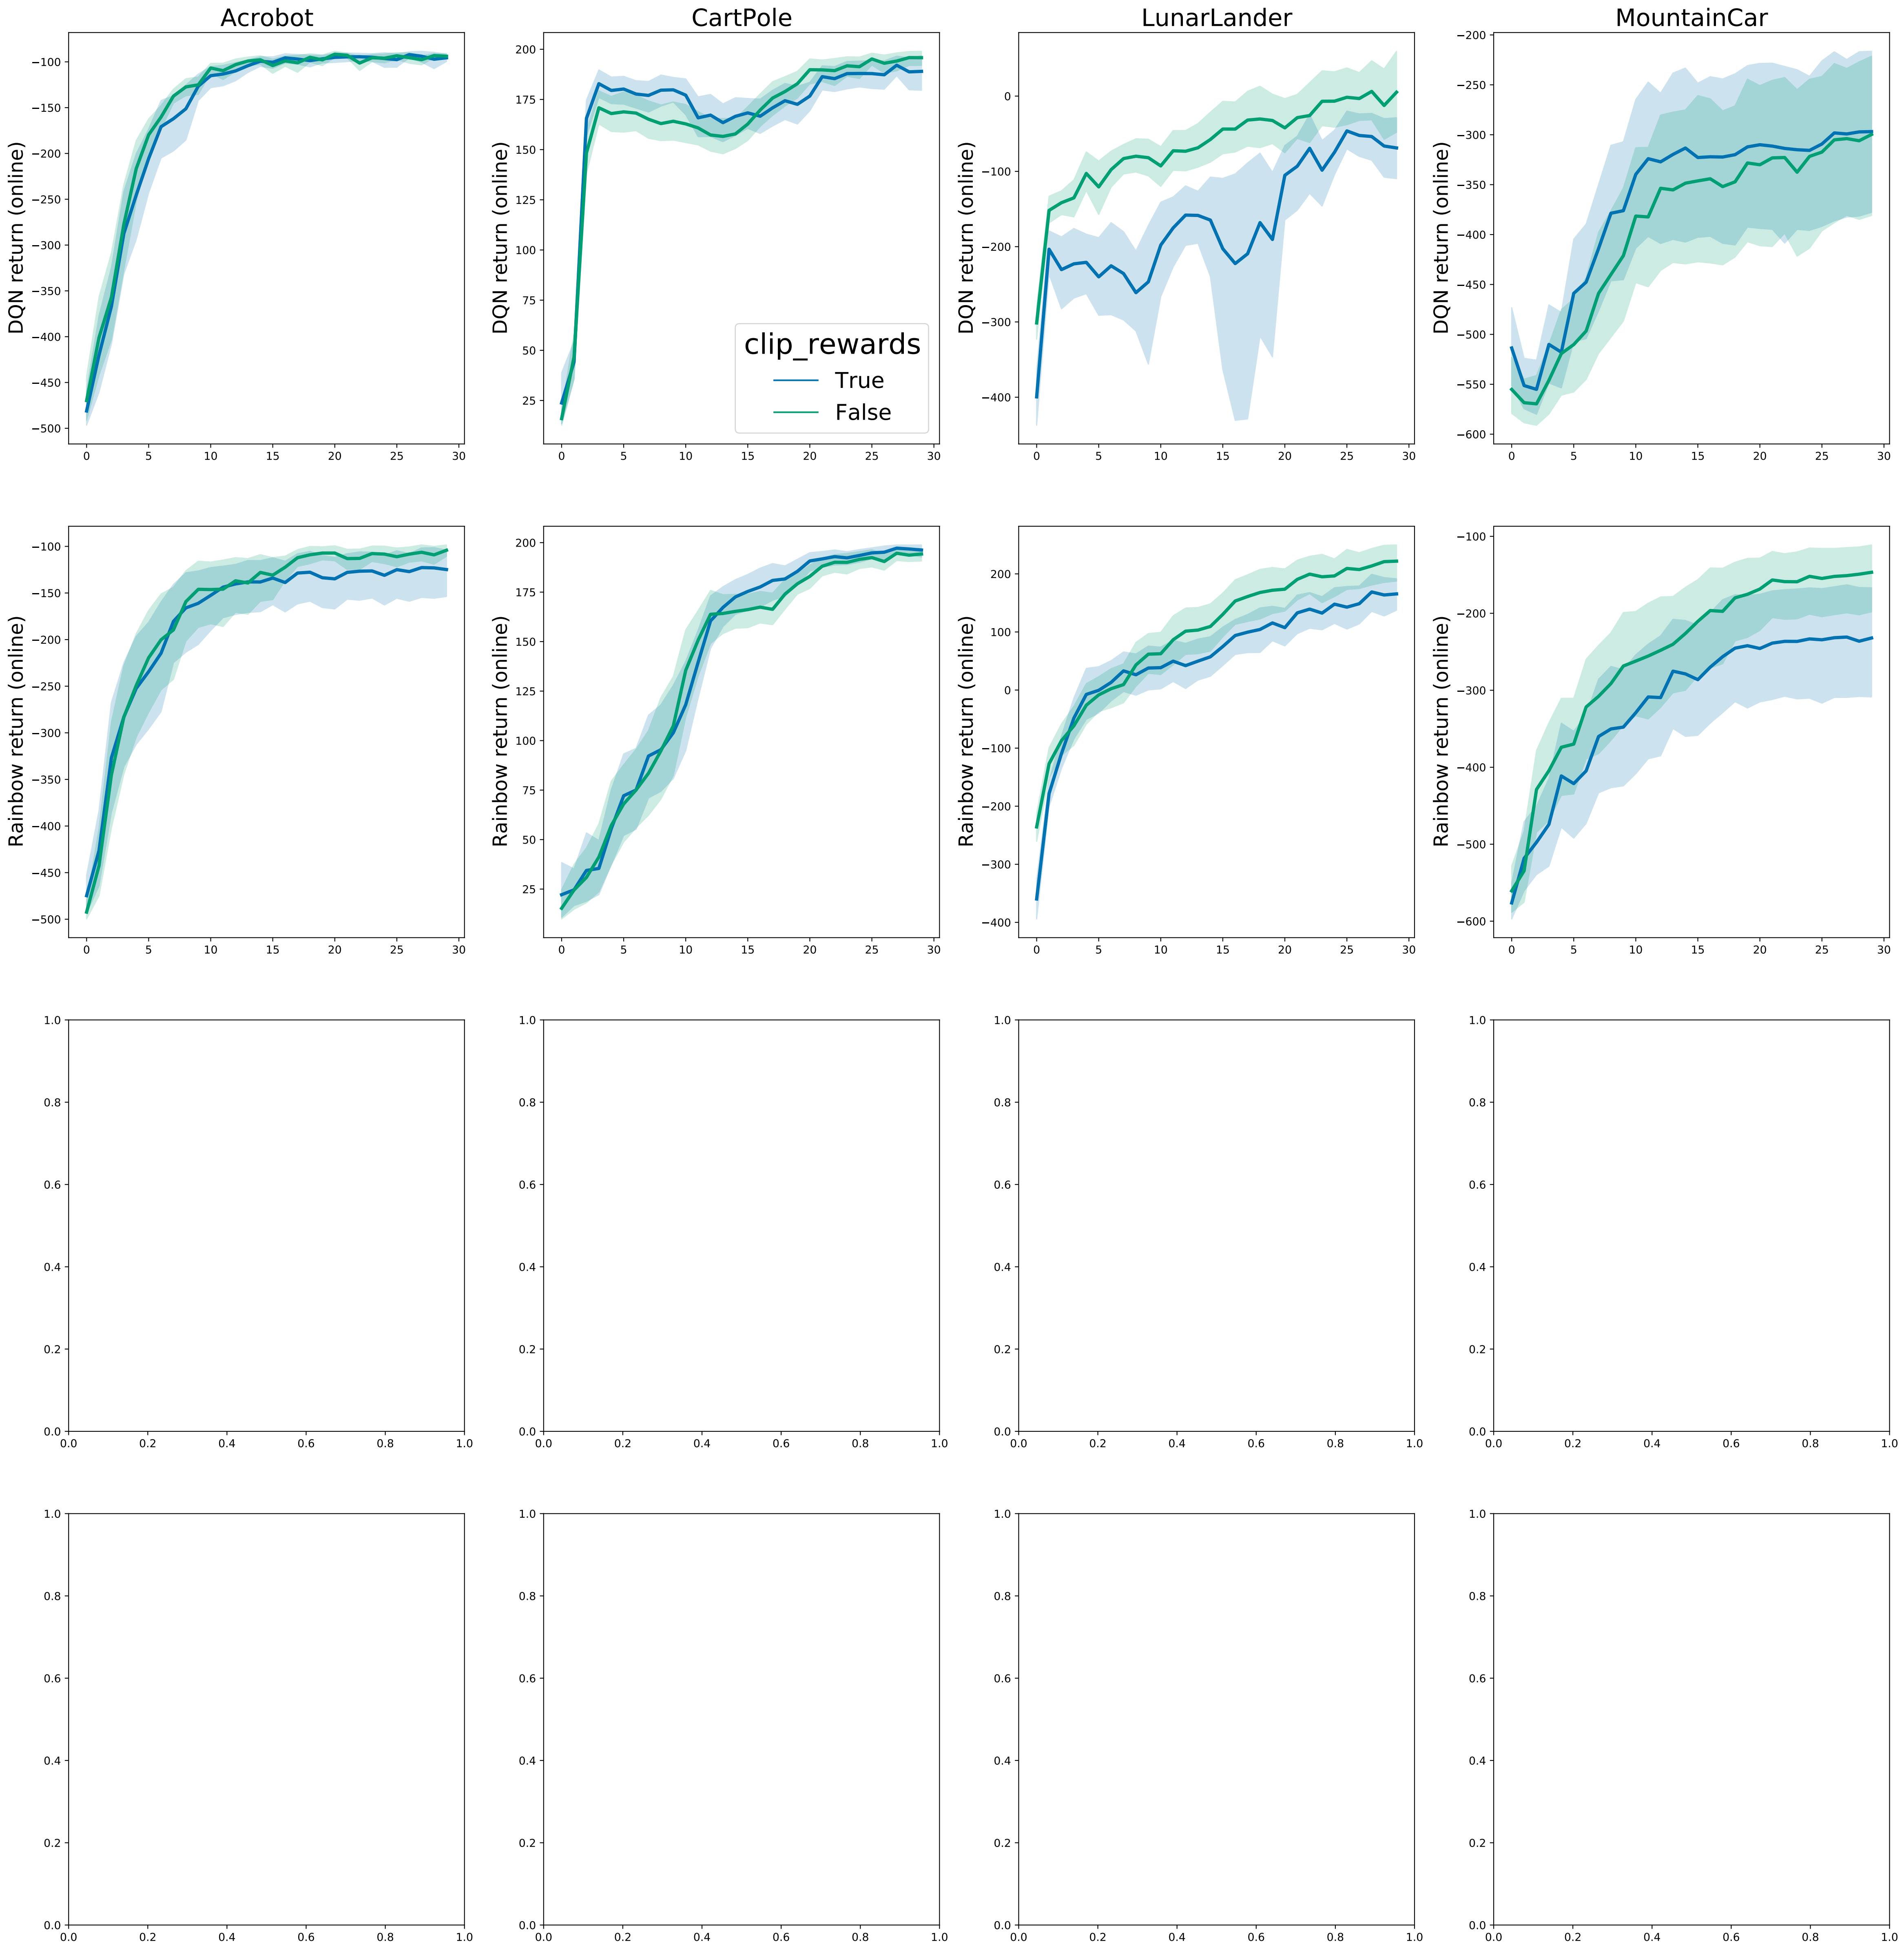

Supplement: supplementary_material [file attachment]

Acrobot

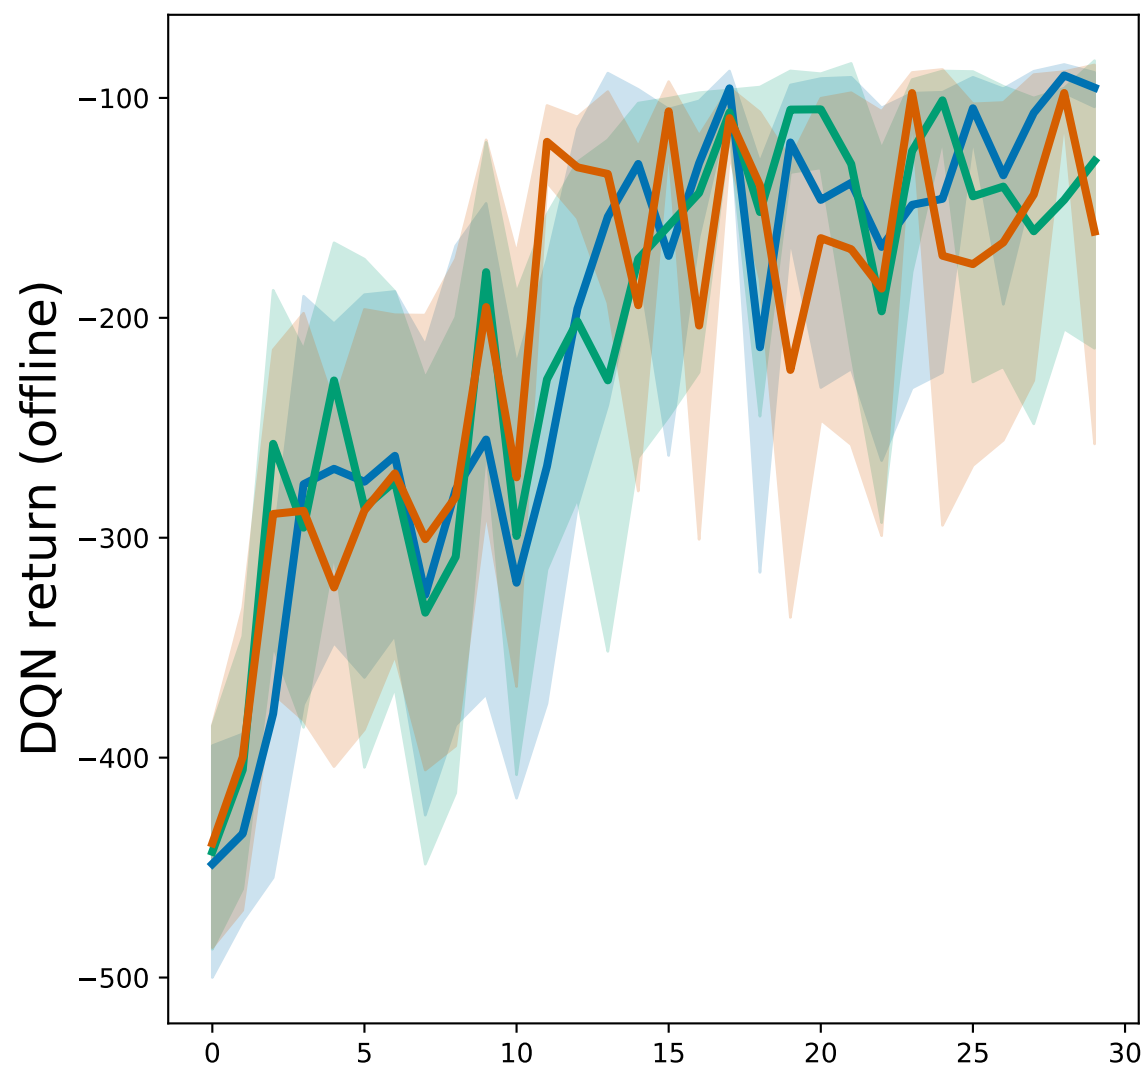

CartPole

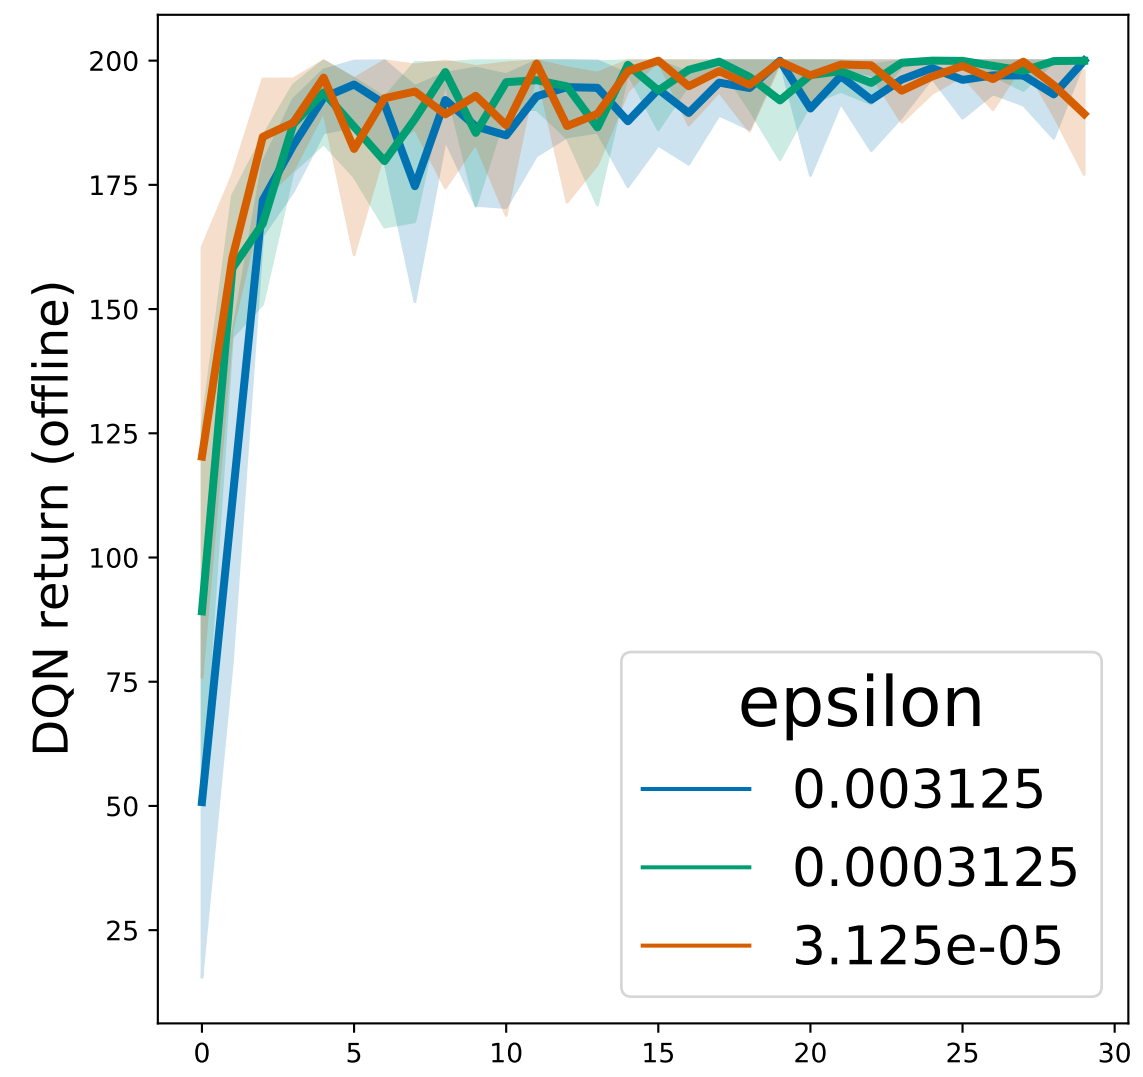

LunarLander

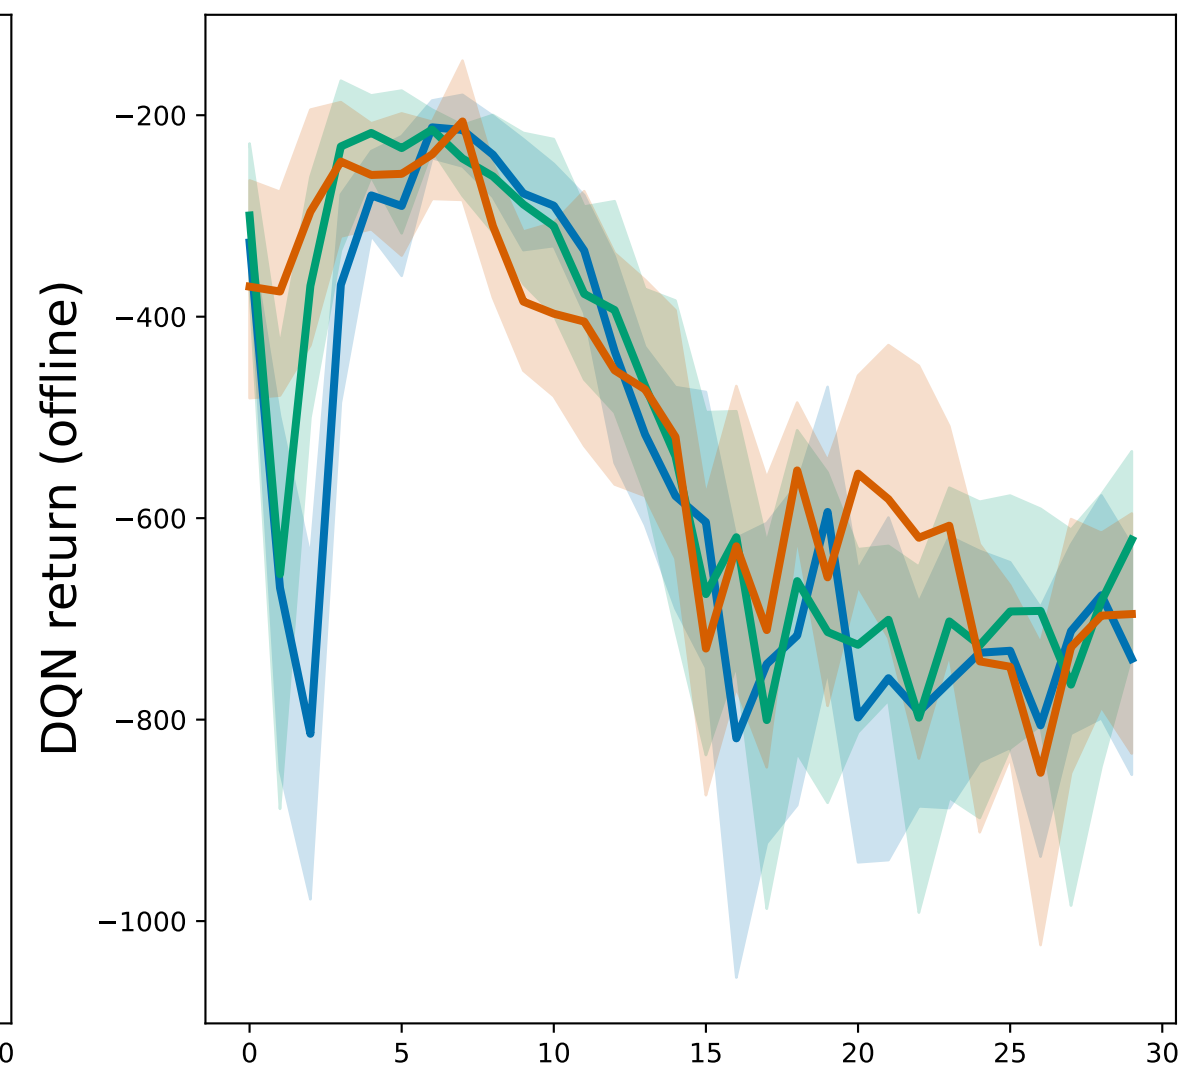

MountainCar

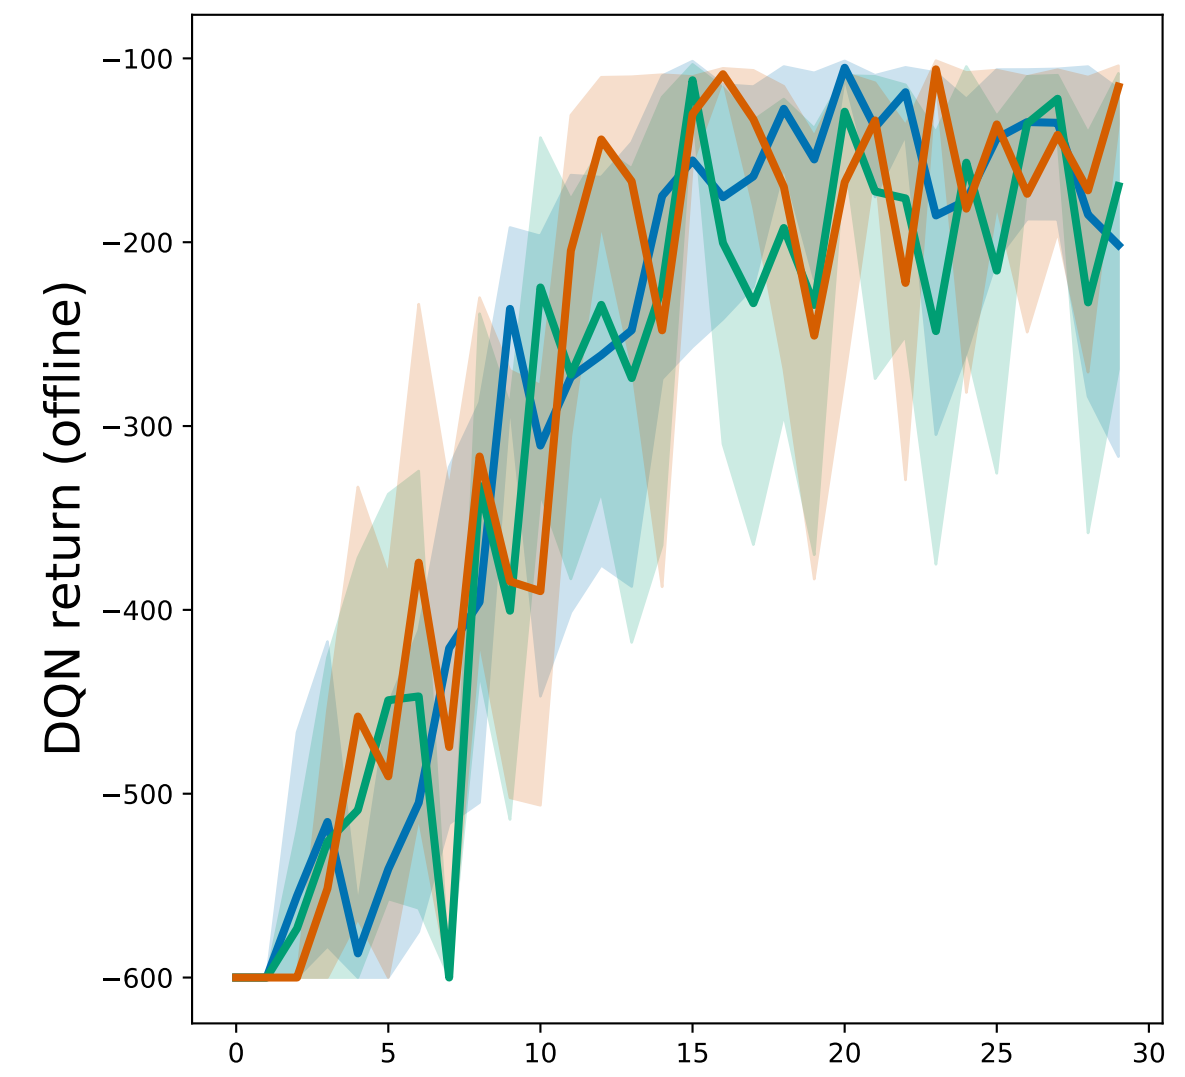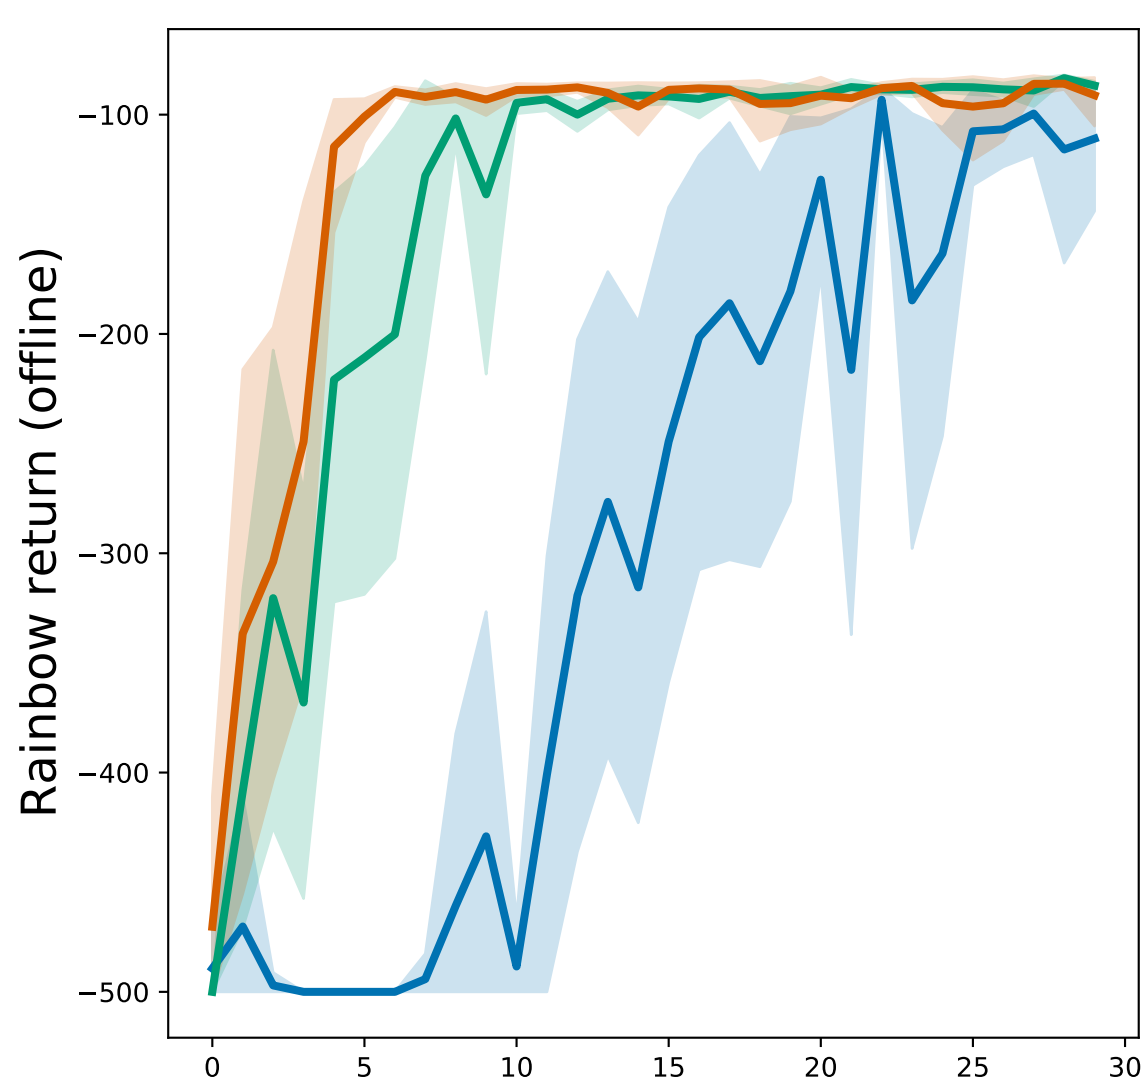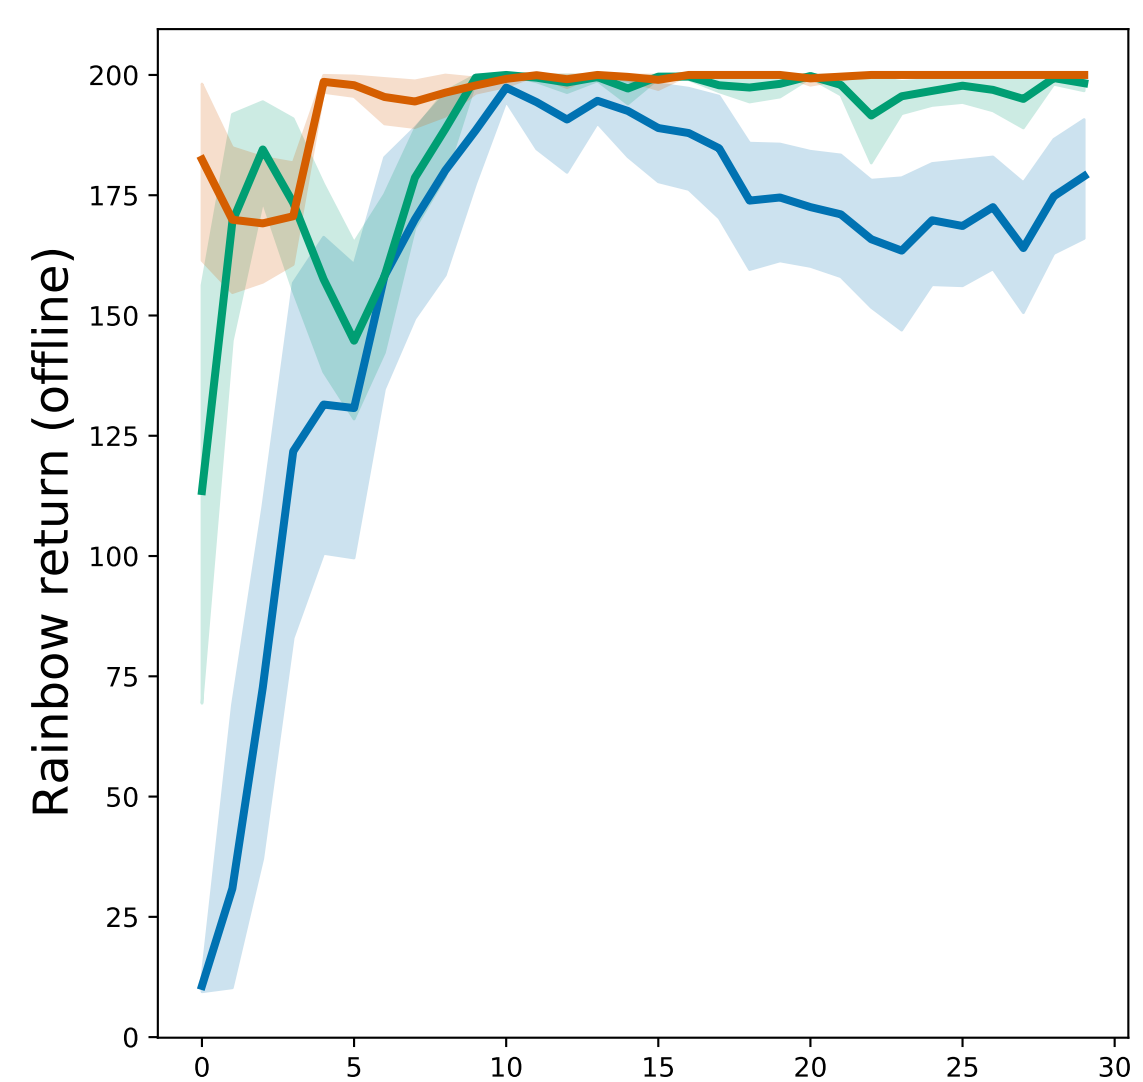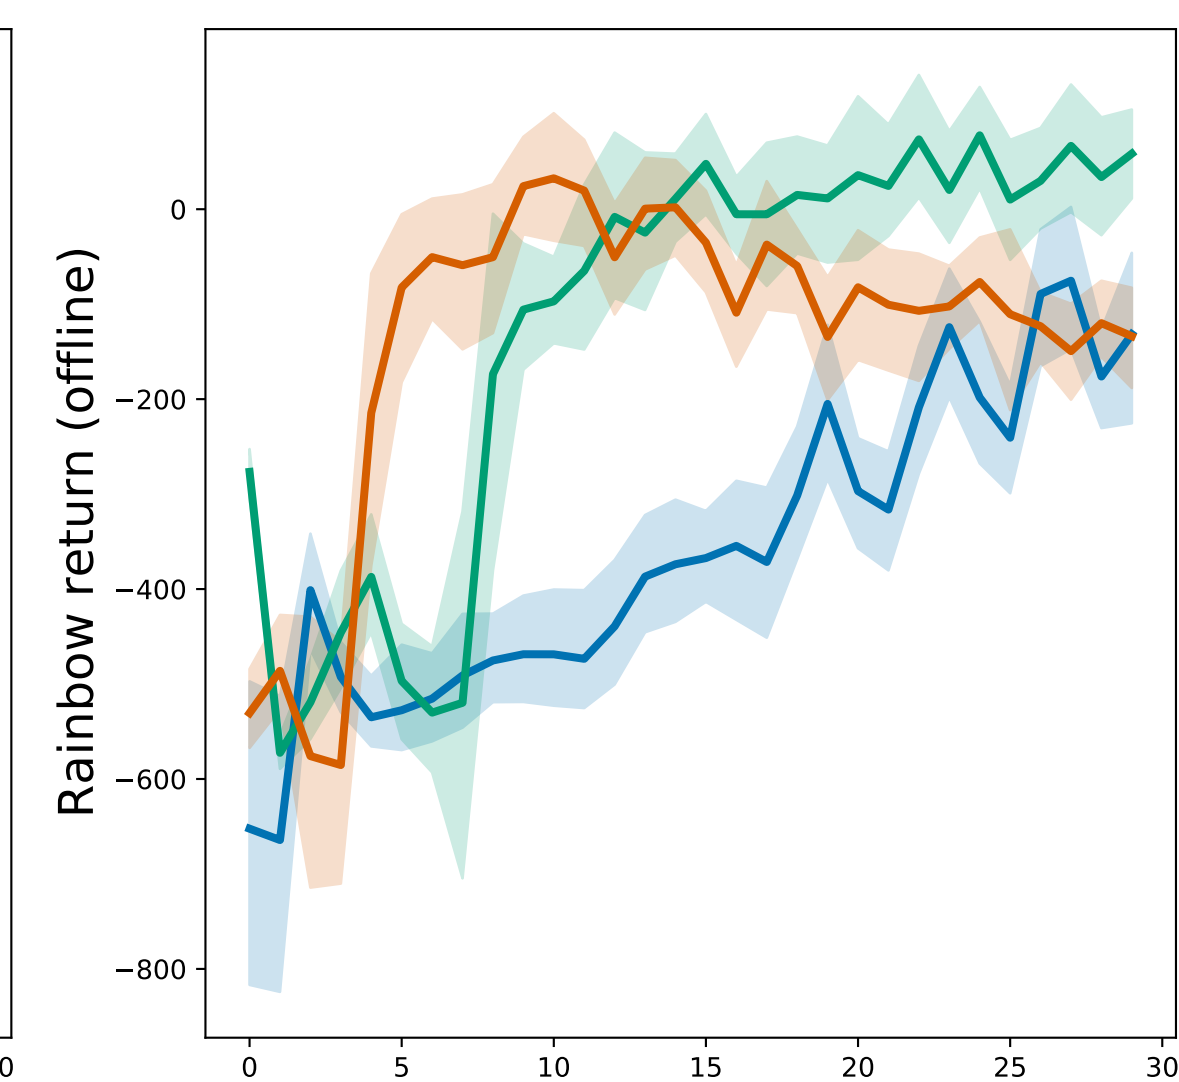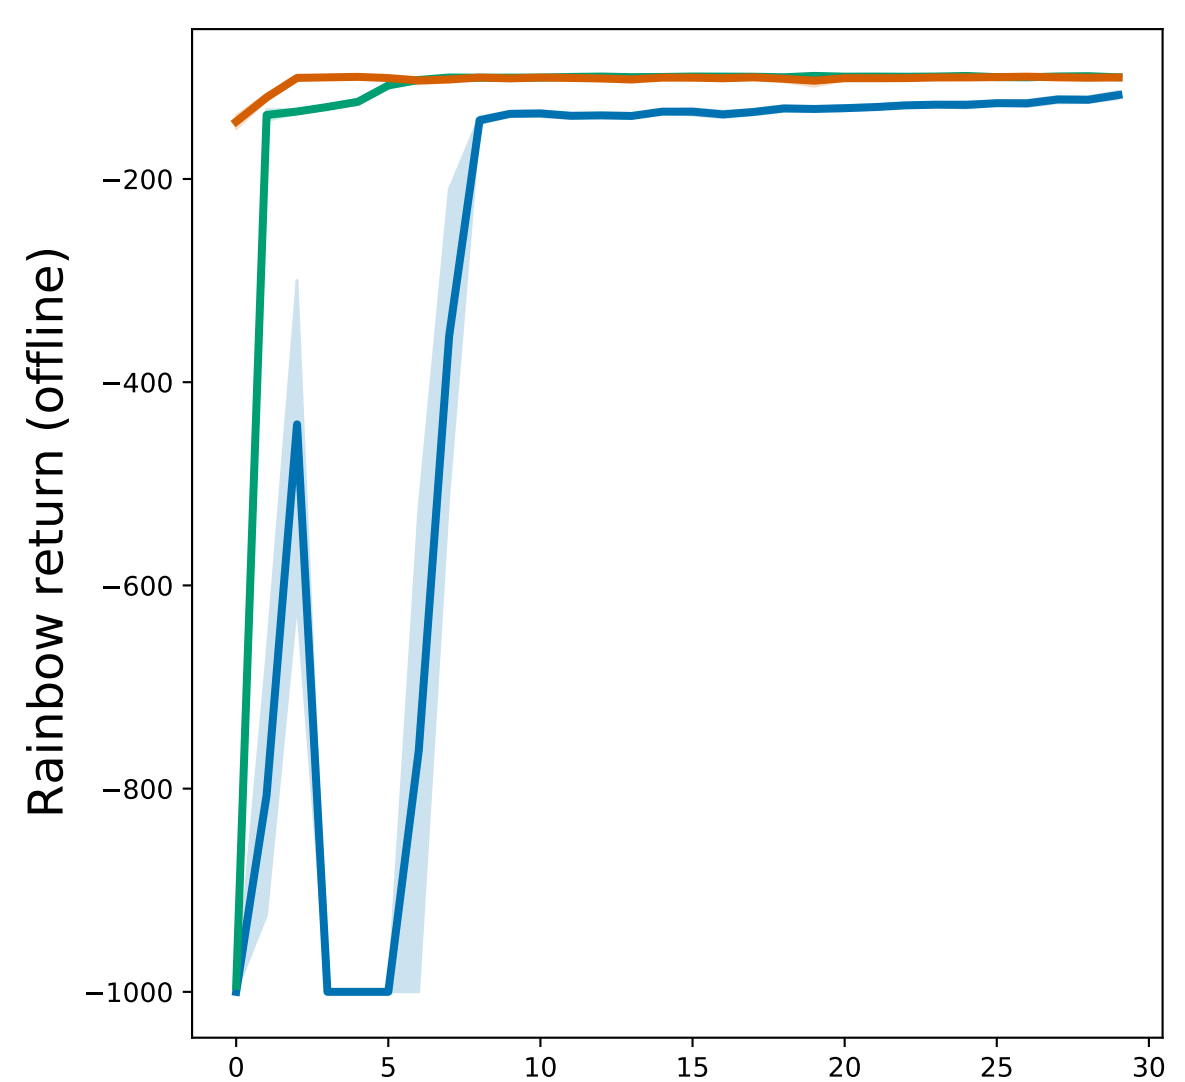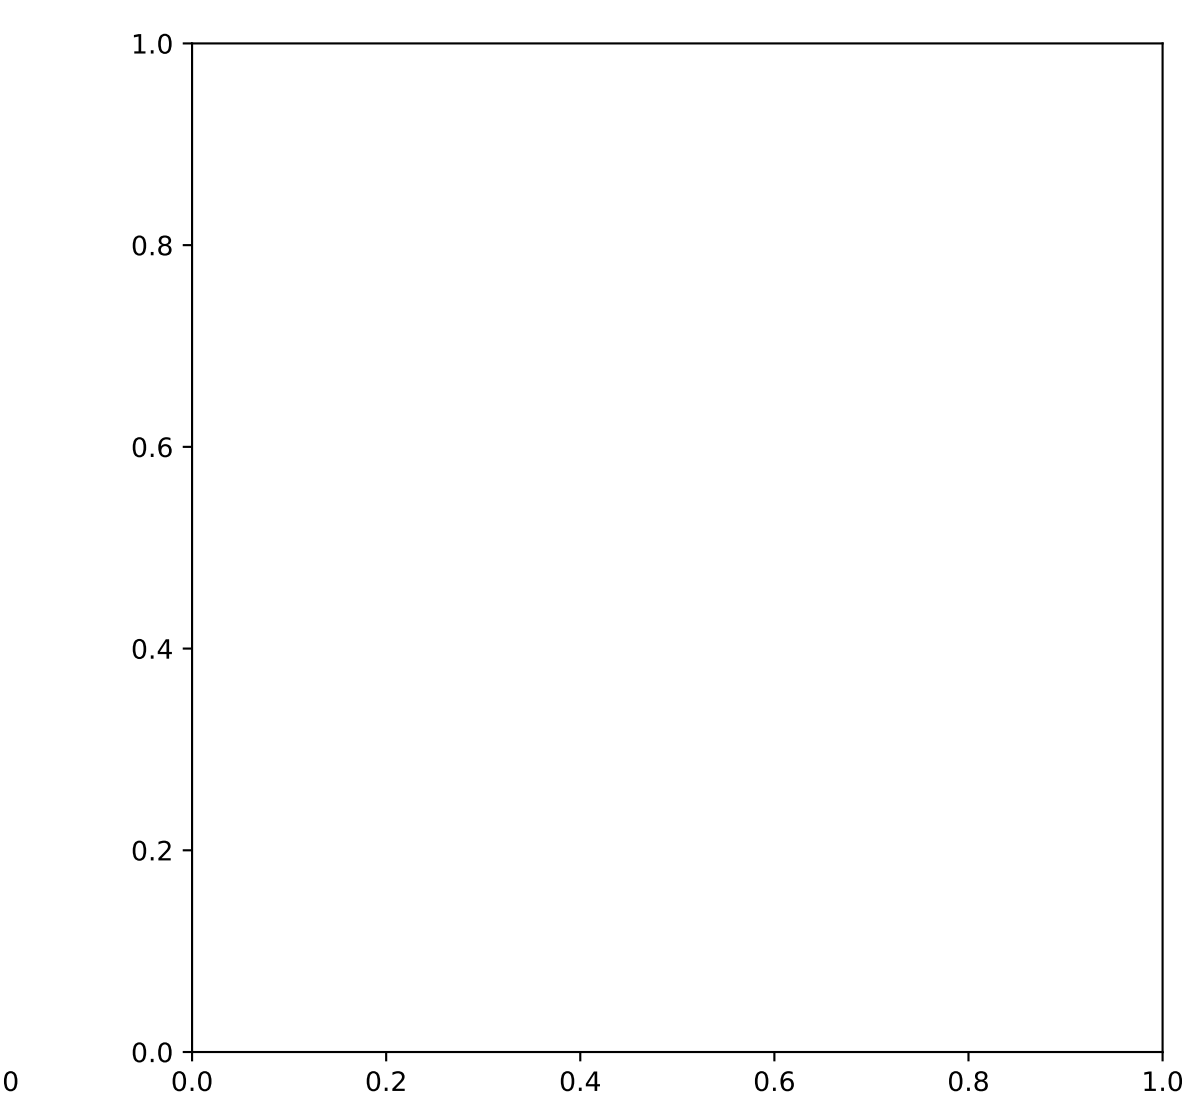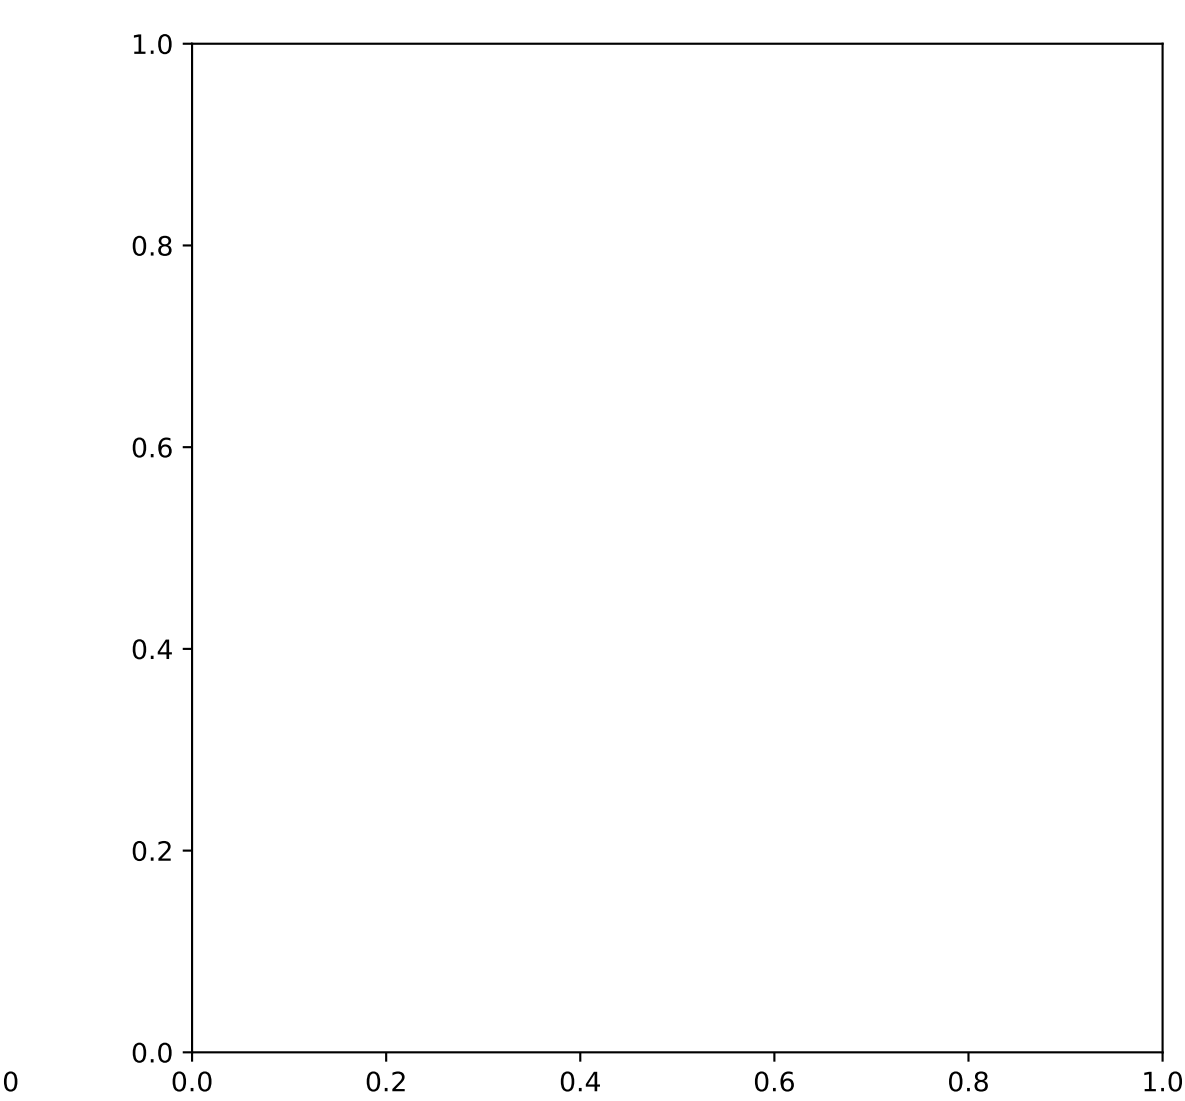

Supplement: supplementary_material [file attachment]

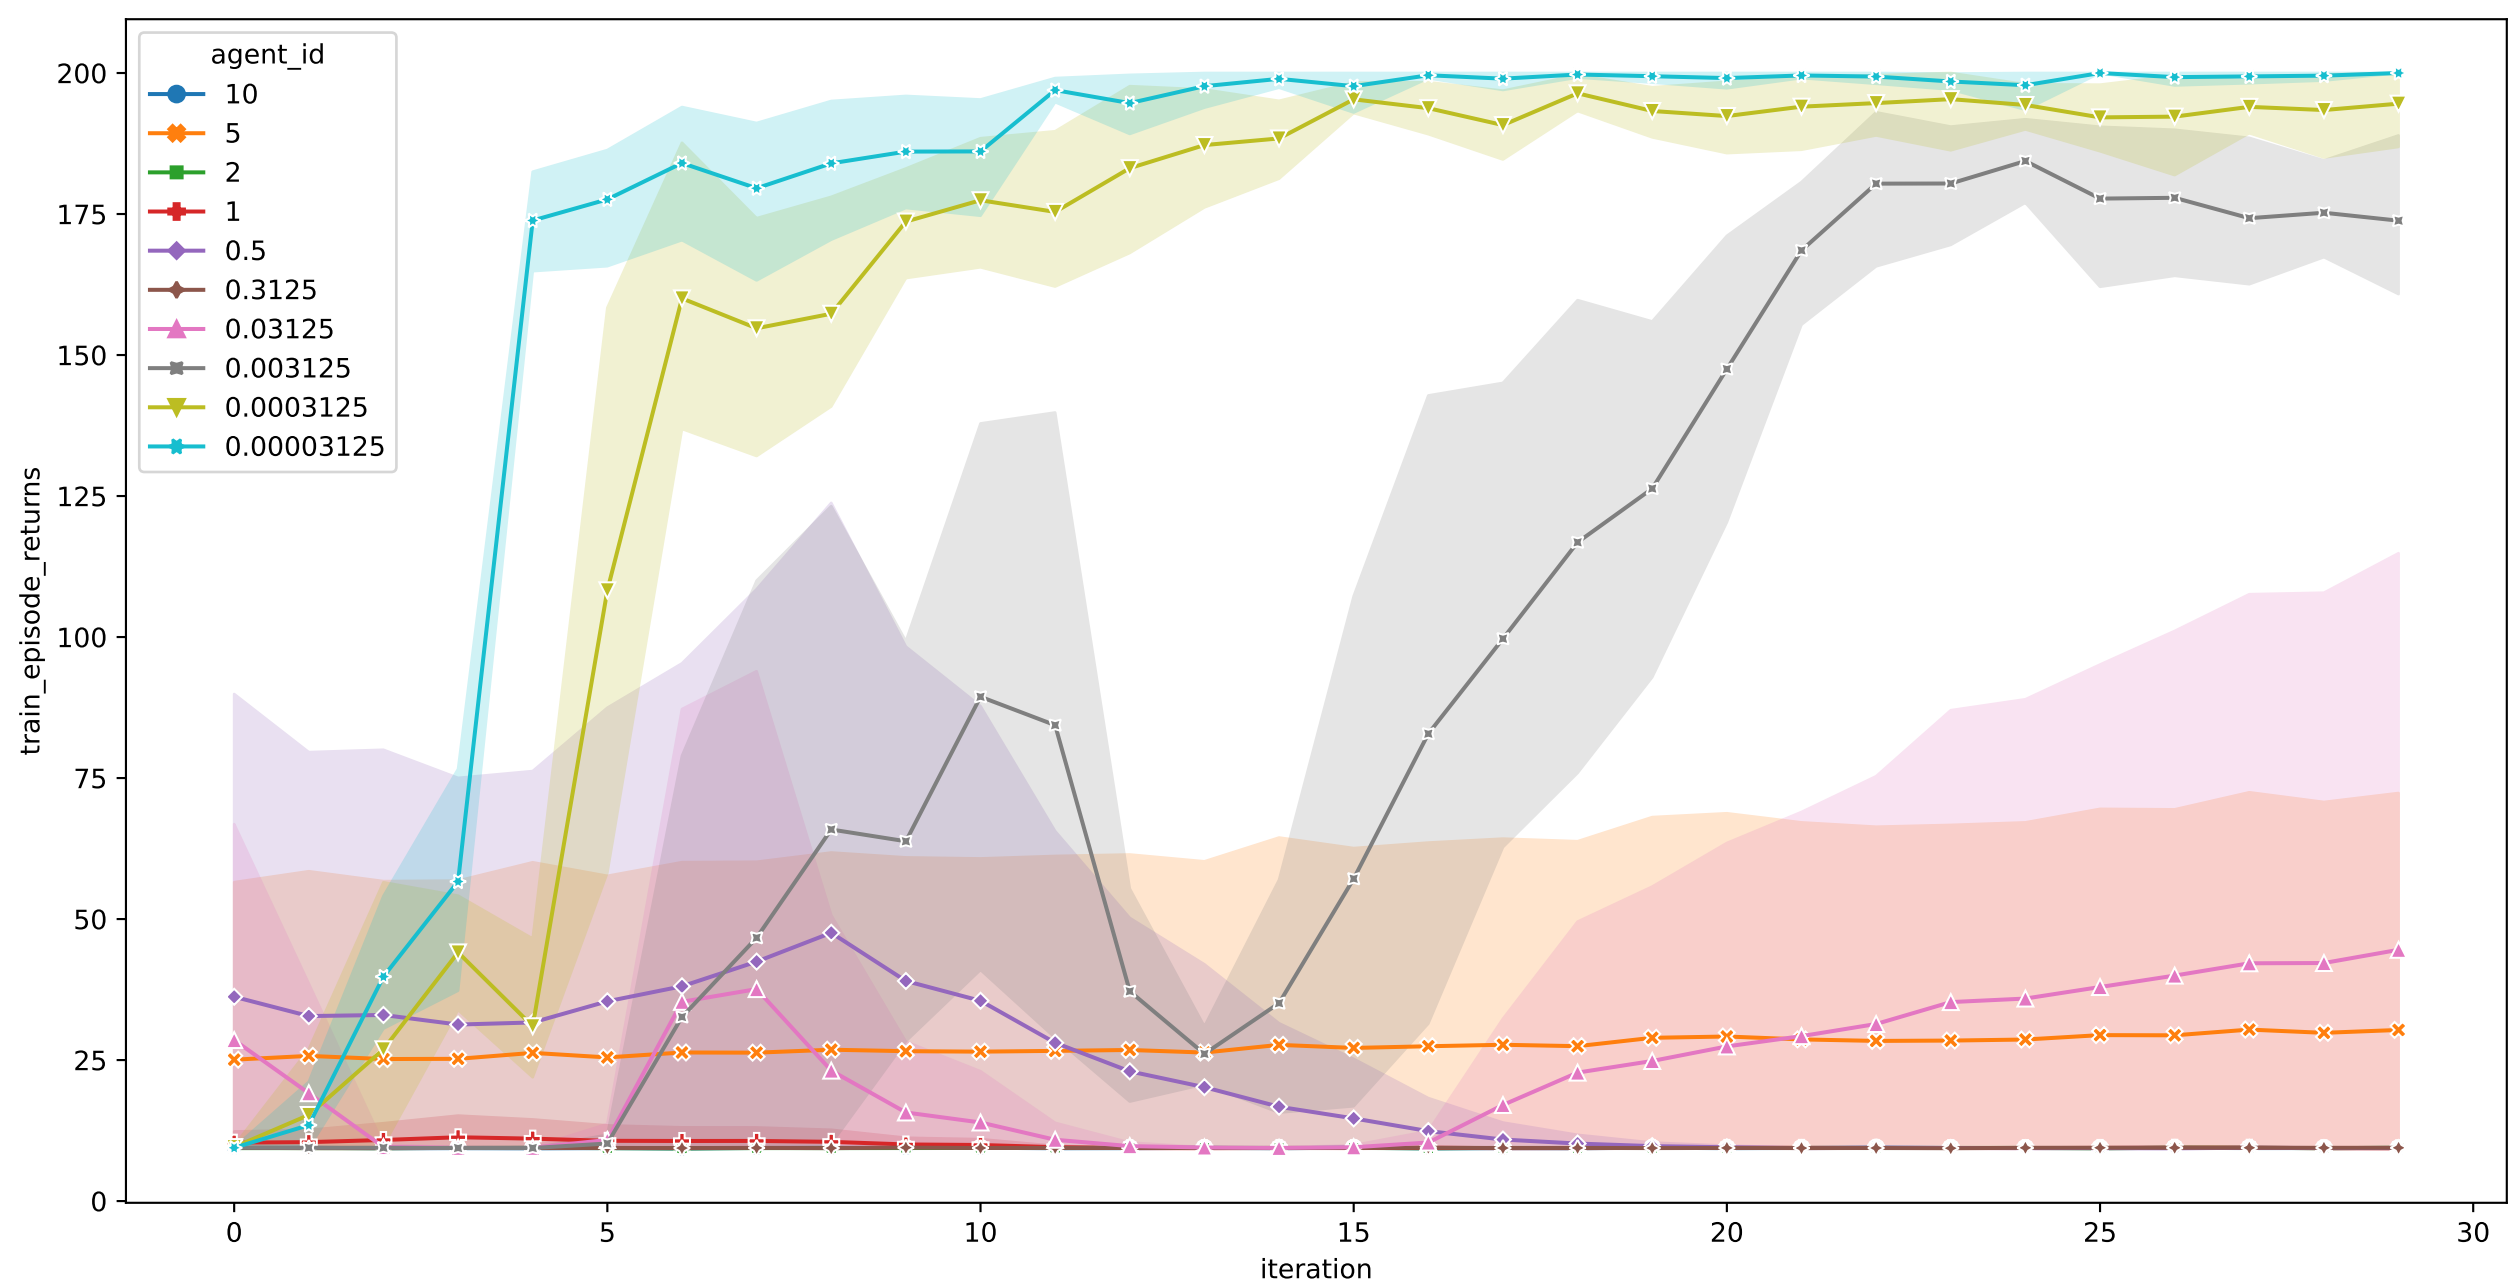

Supplement: supplementary_material [file attachment]

Acrobot

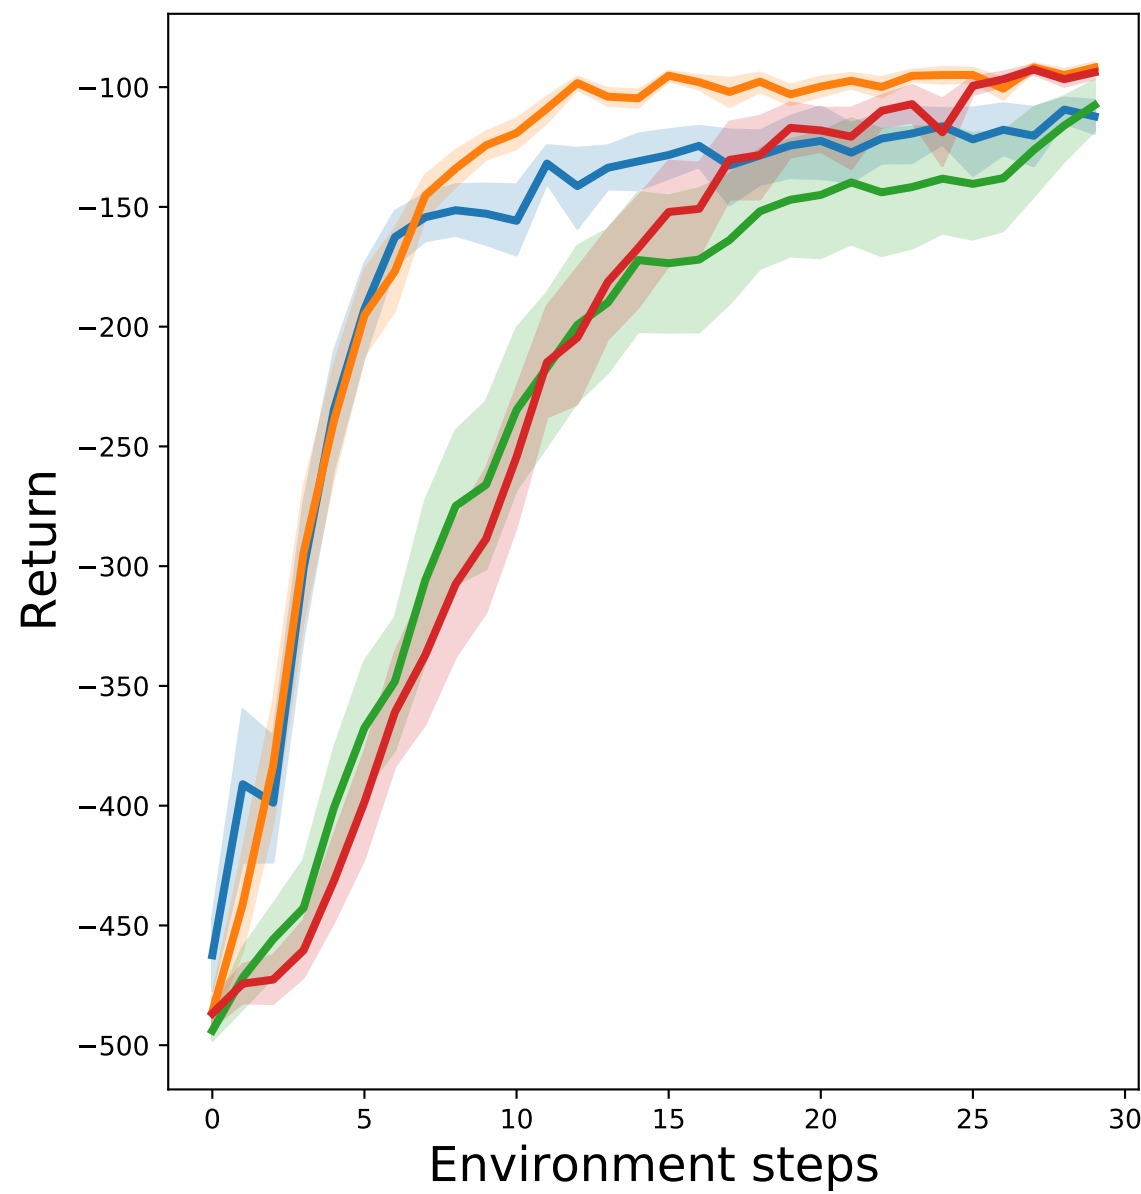

CartPole

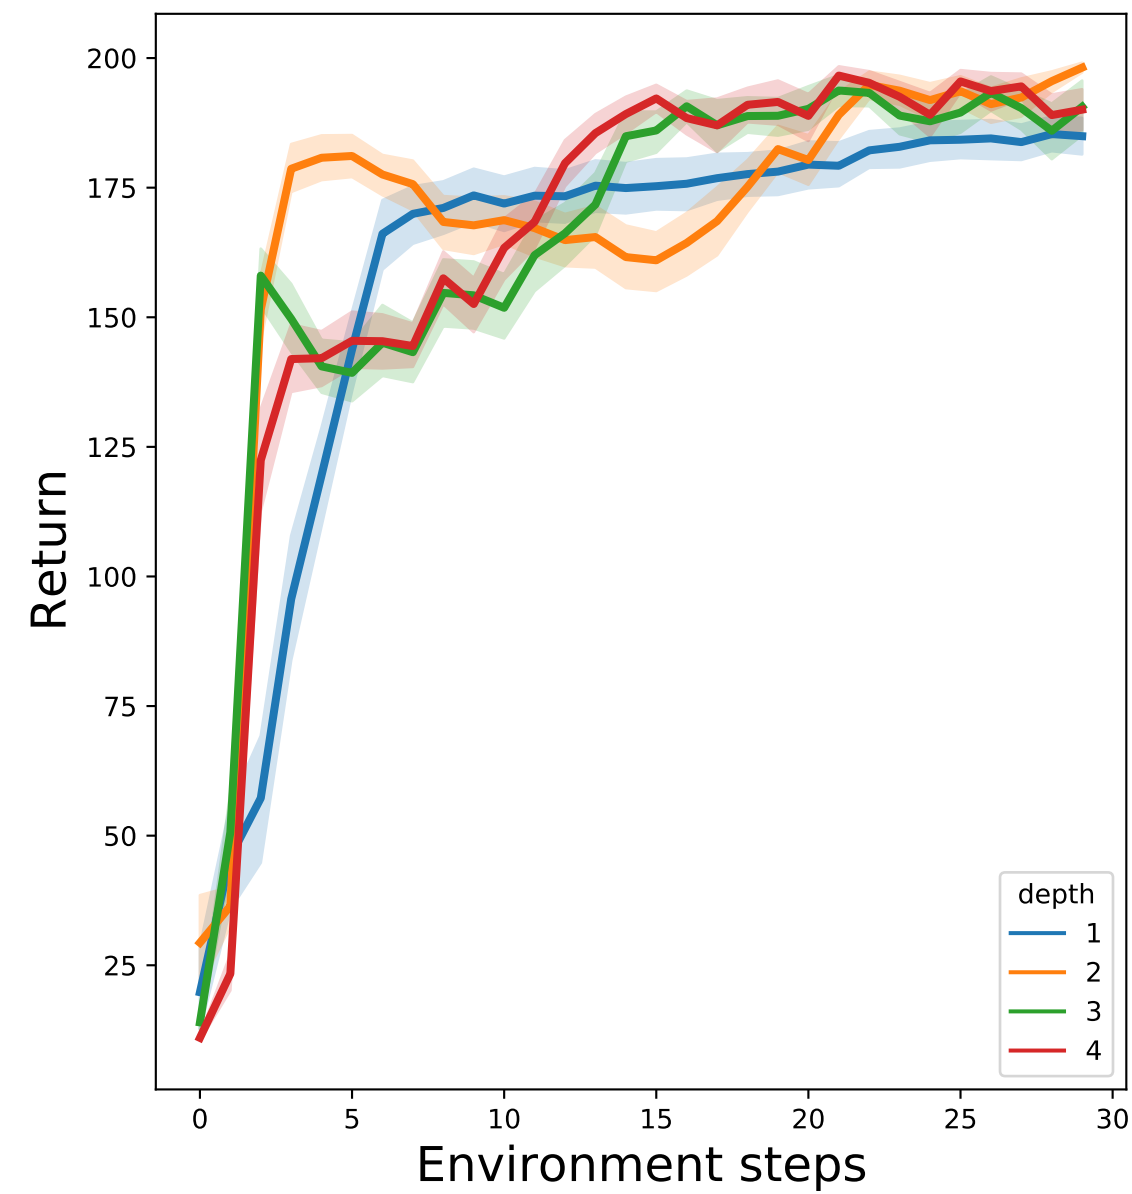

LunarLander

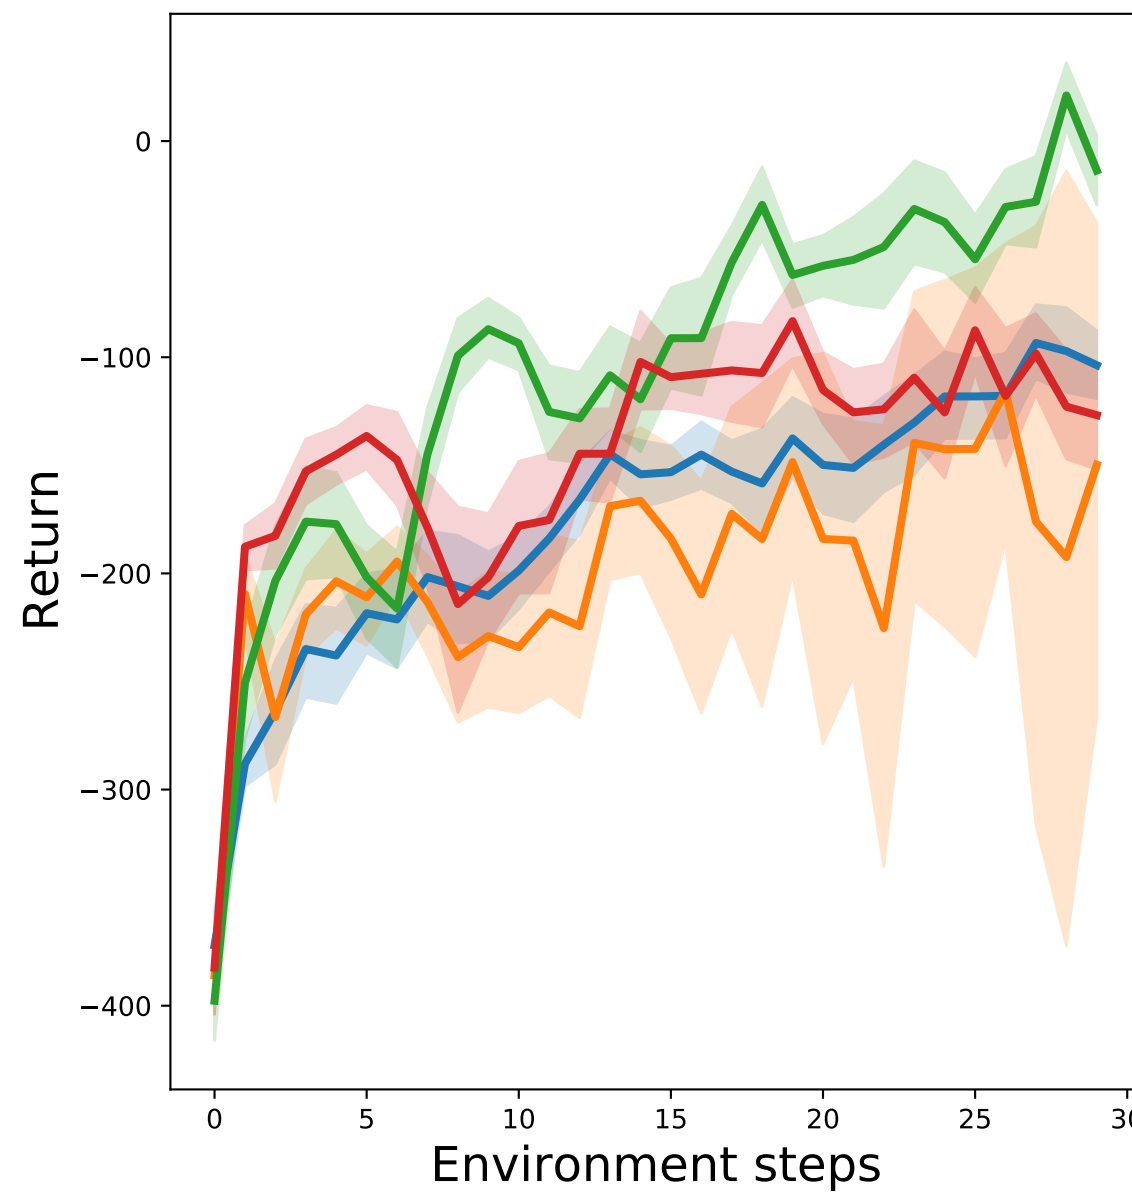

MountainCar

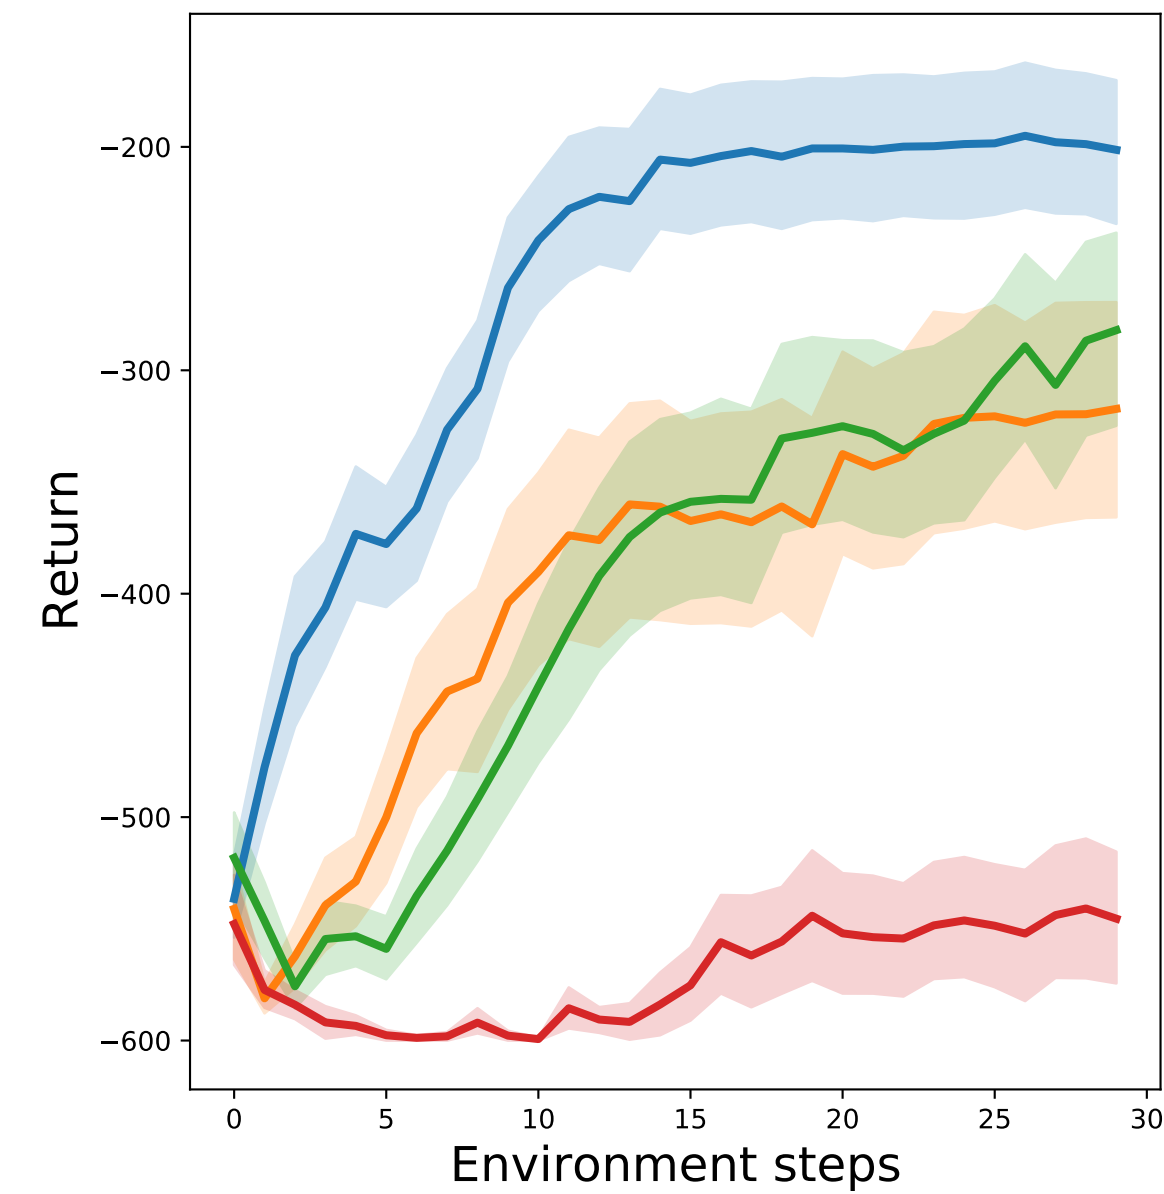

Acrobot

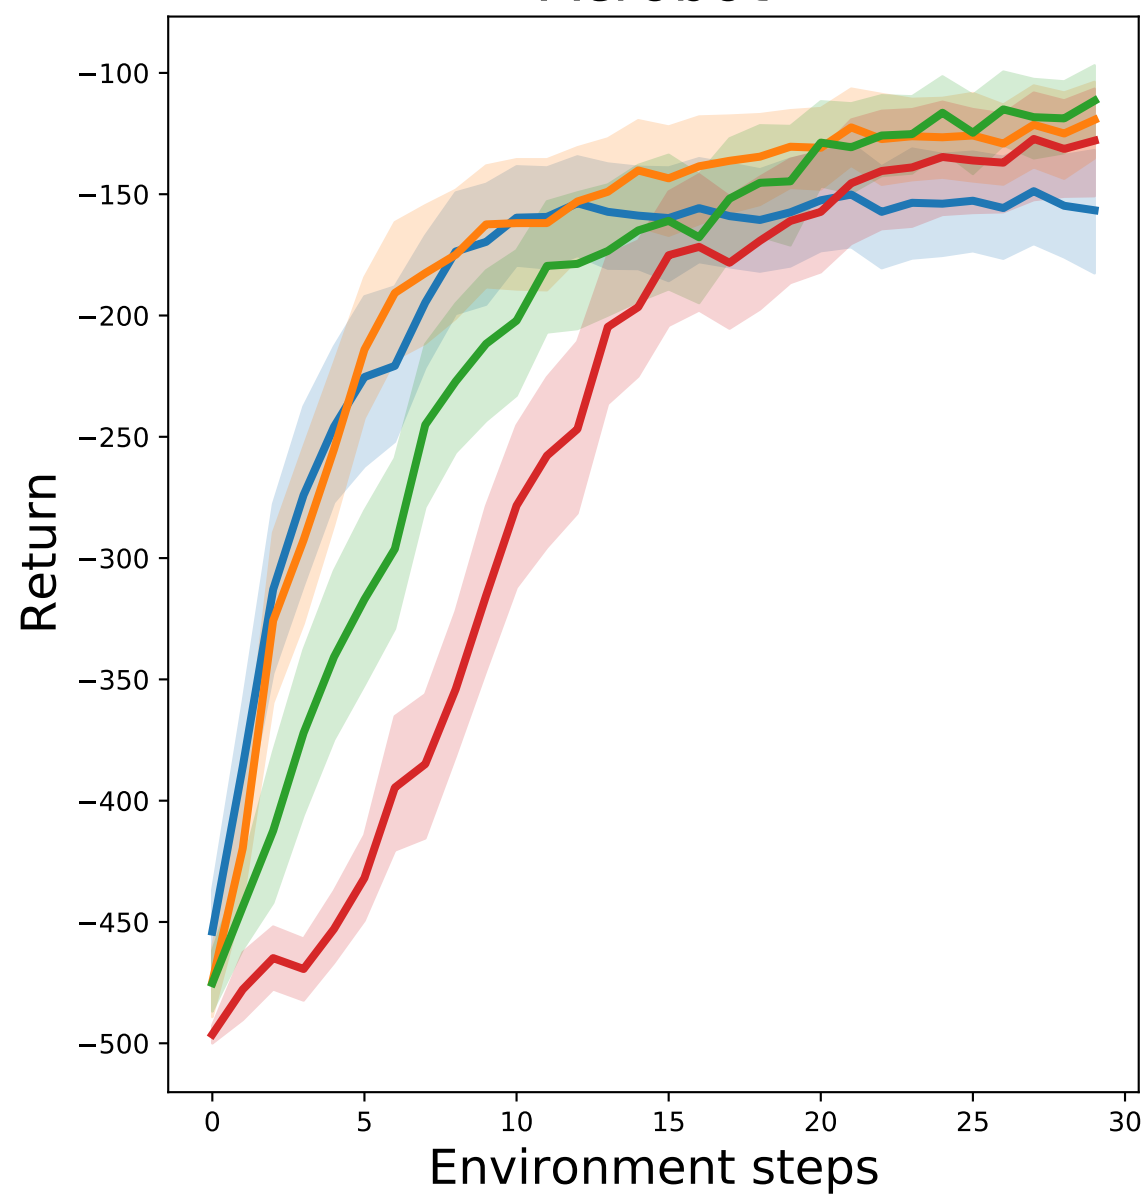

CartPole

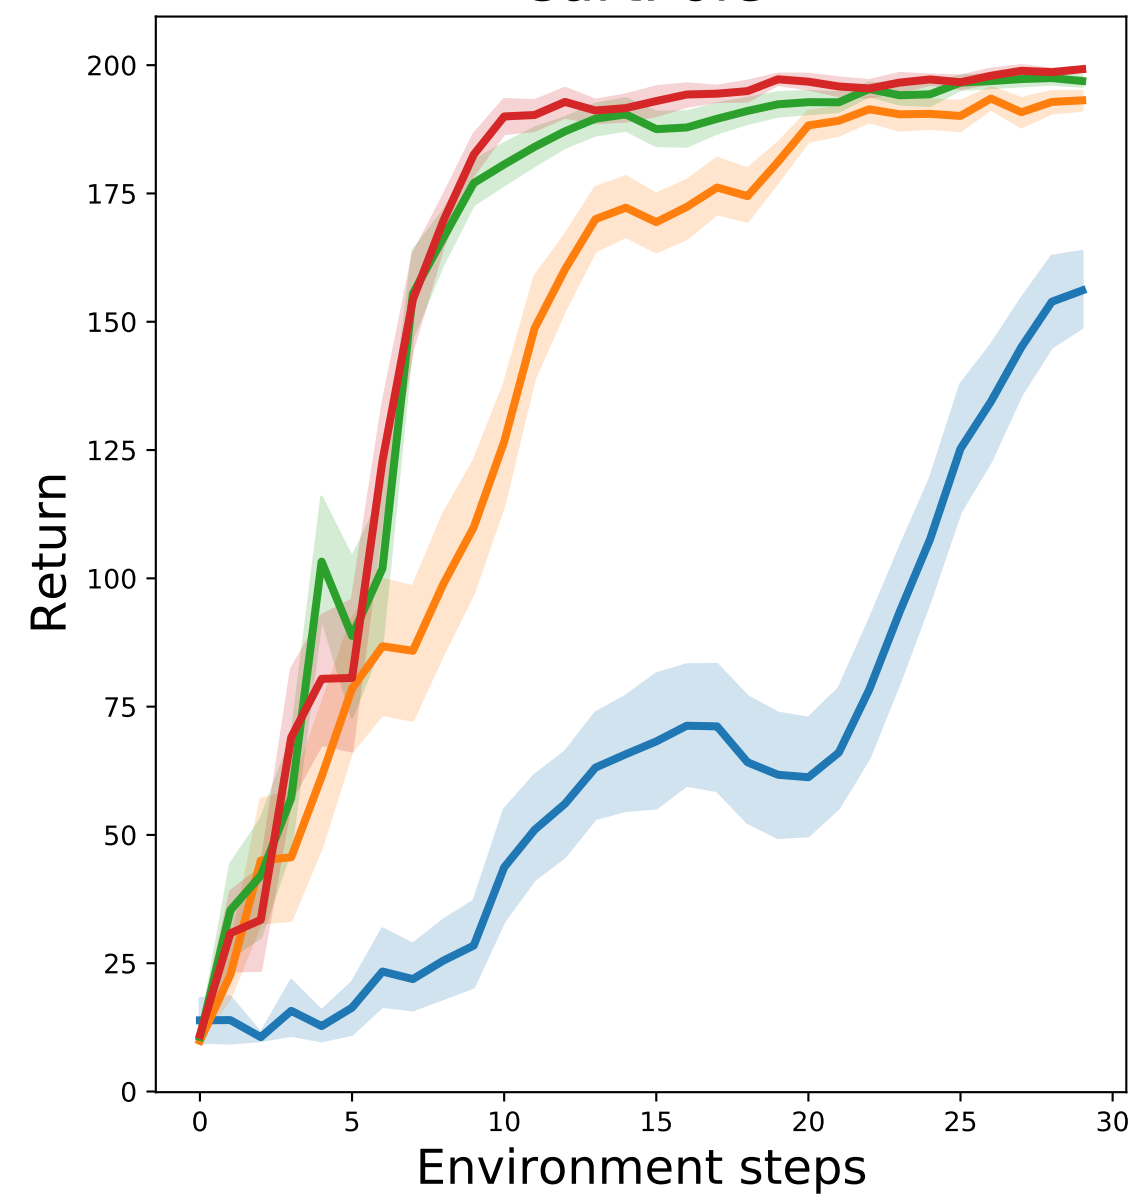

LunarLander

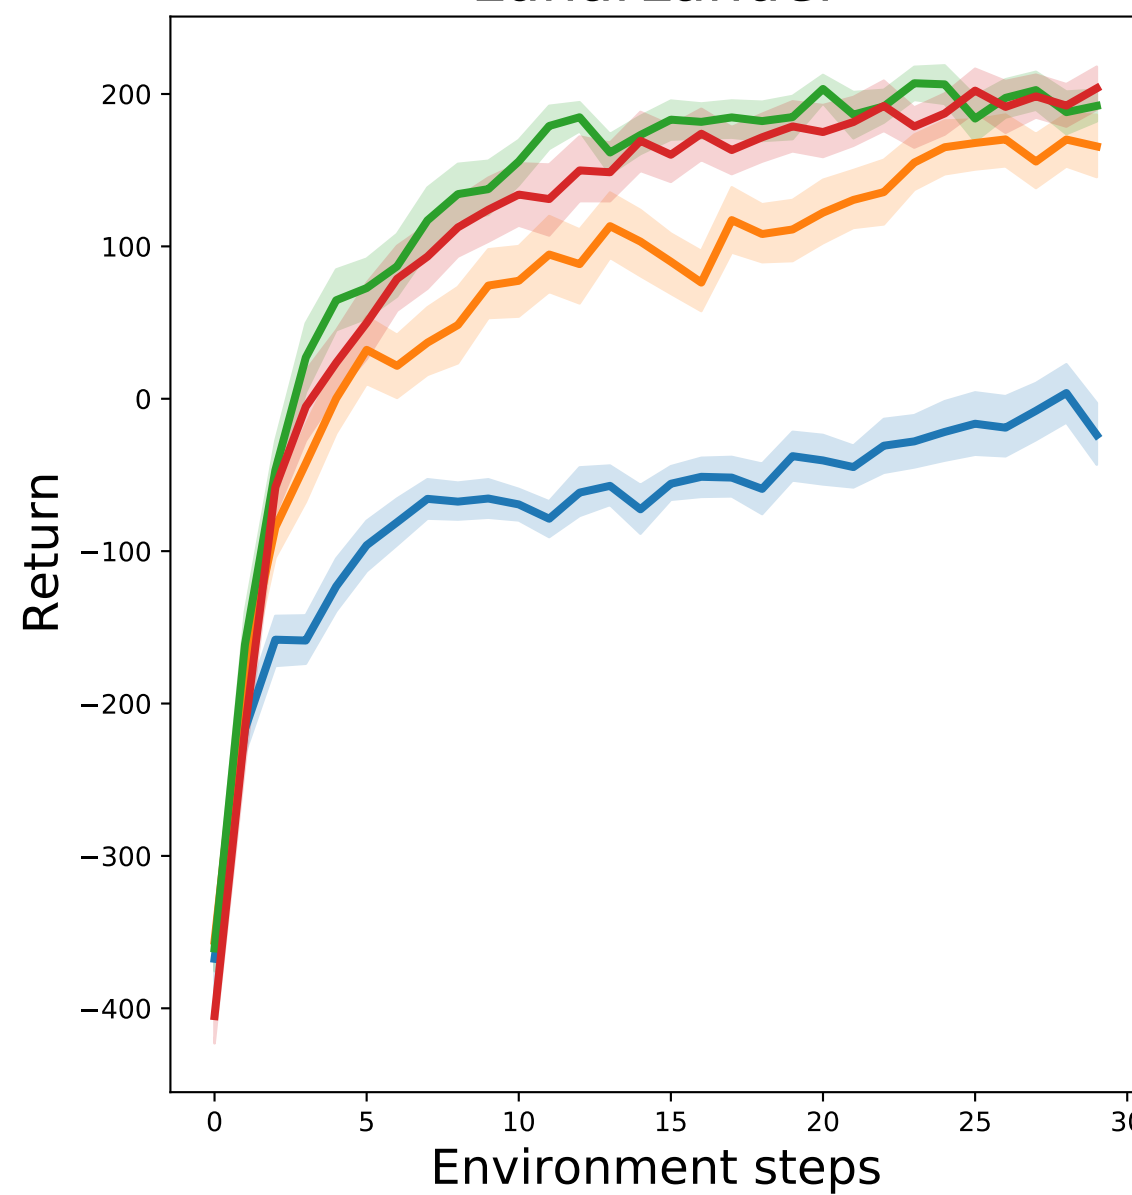

MountainCar

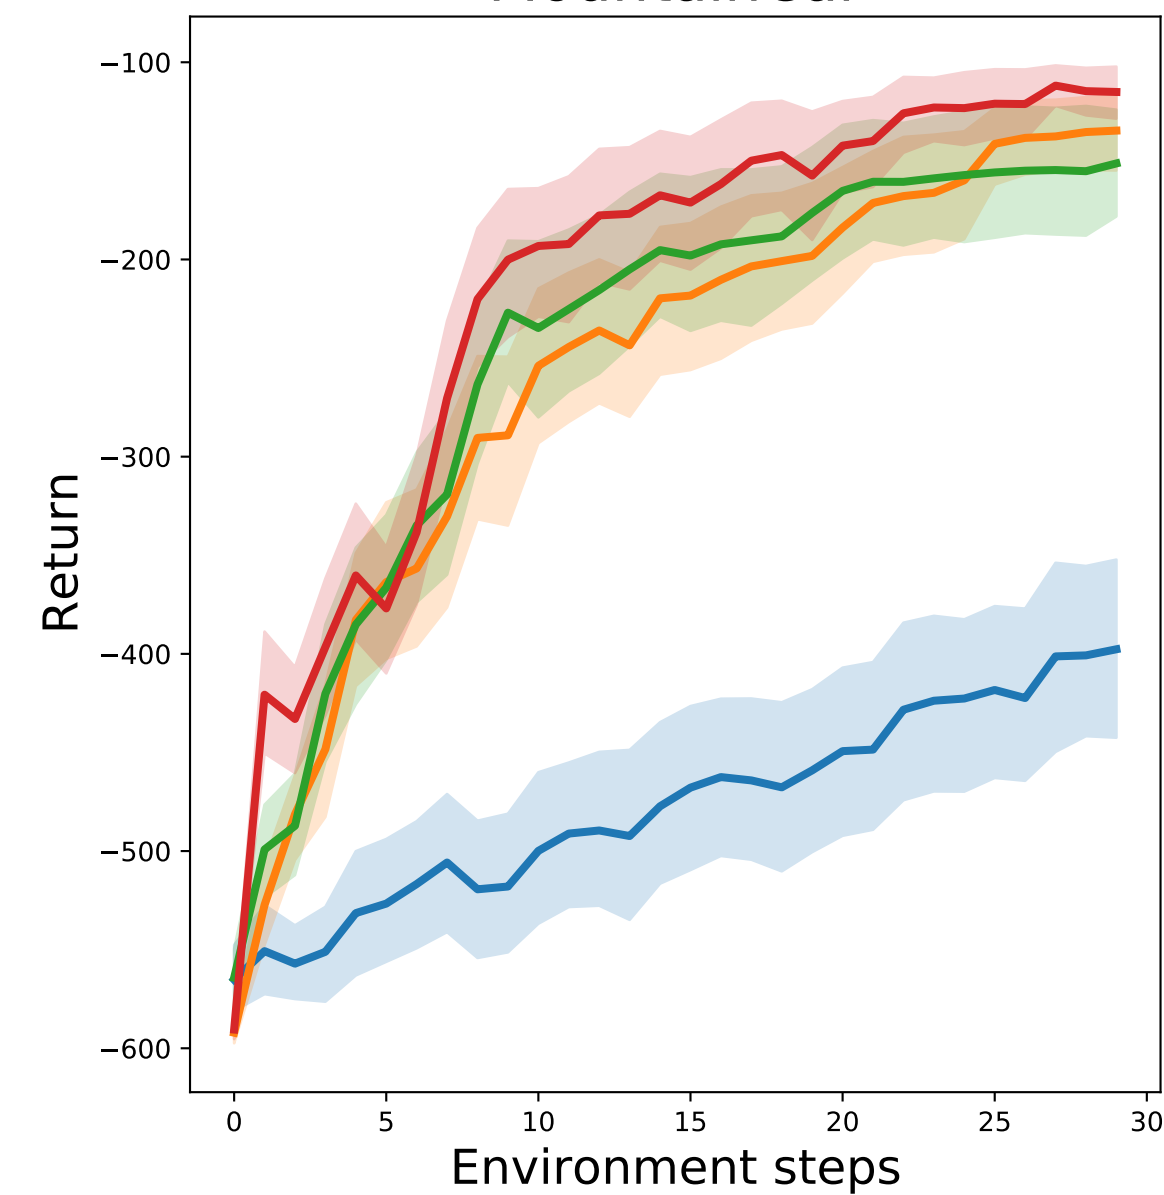

Supplement: supplementary_material [file attachment]

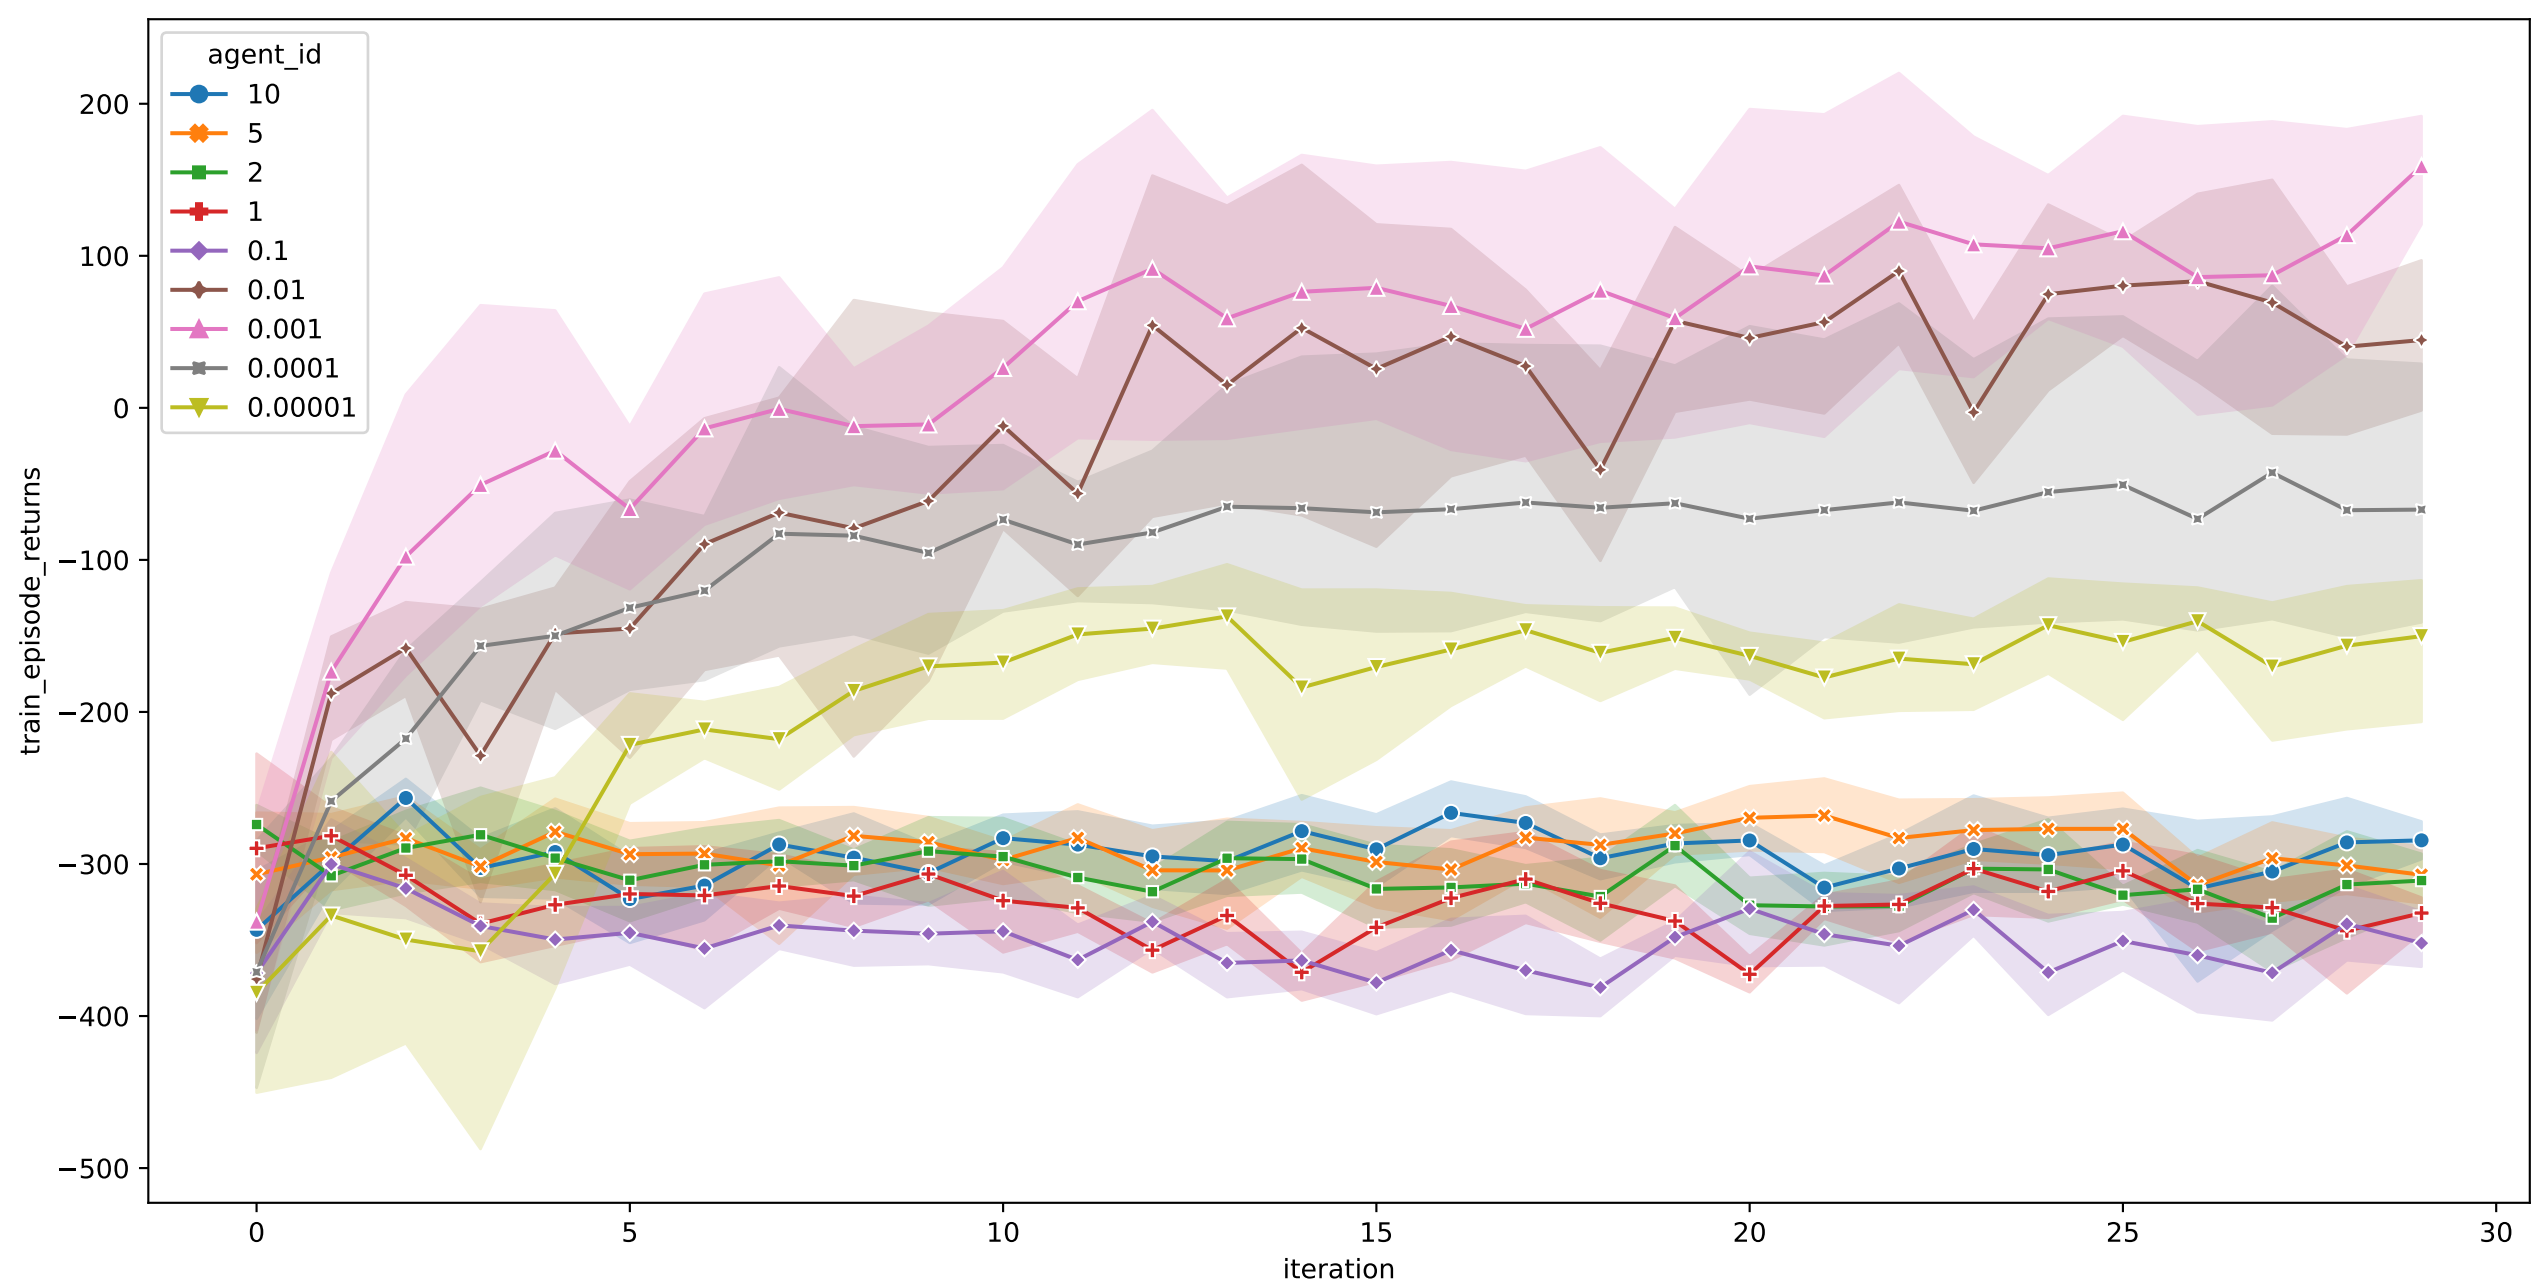

Supplement: supplementary_material [file attachment]

Acrobot

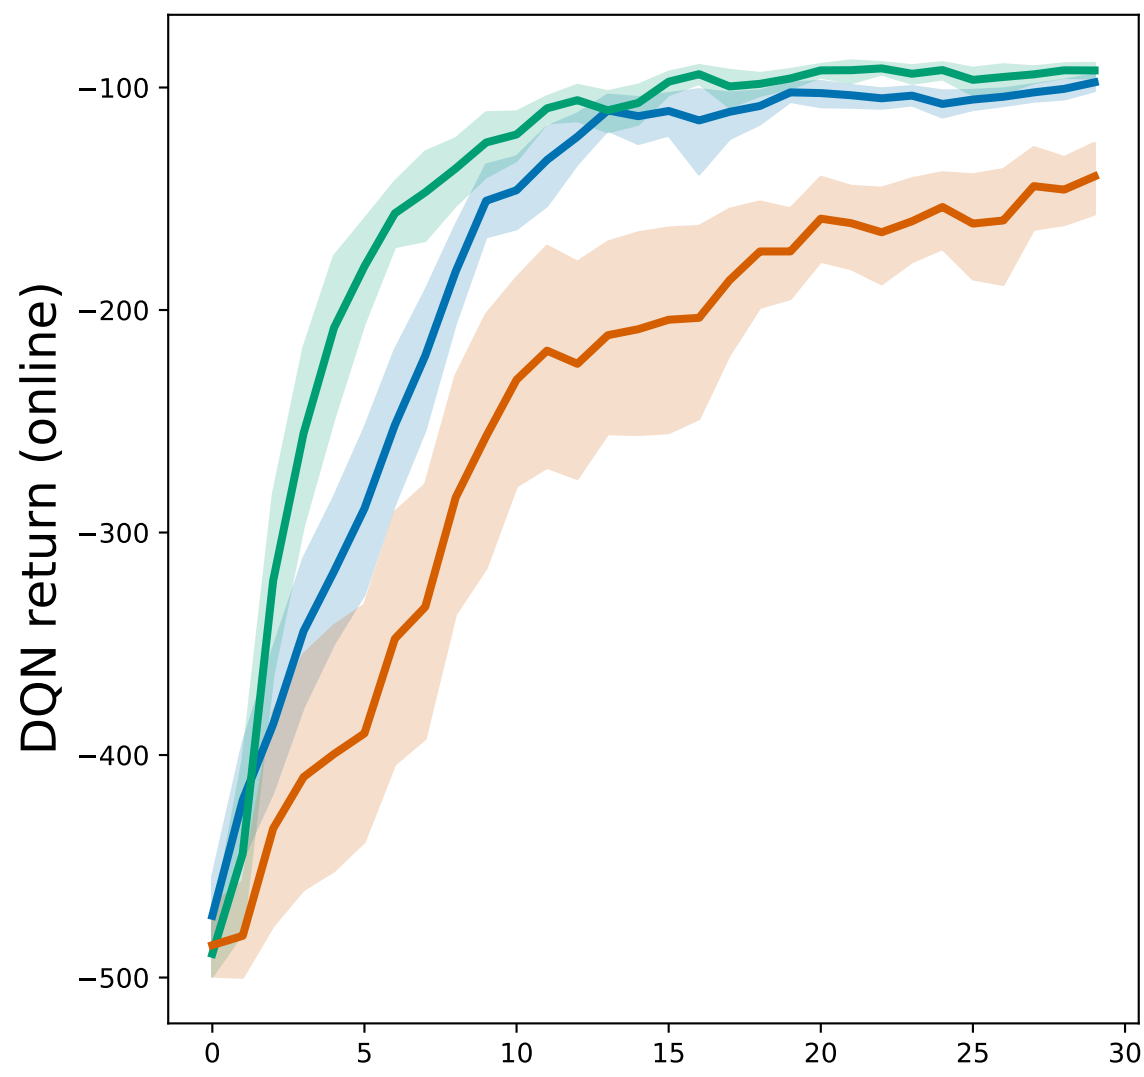

CartPole

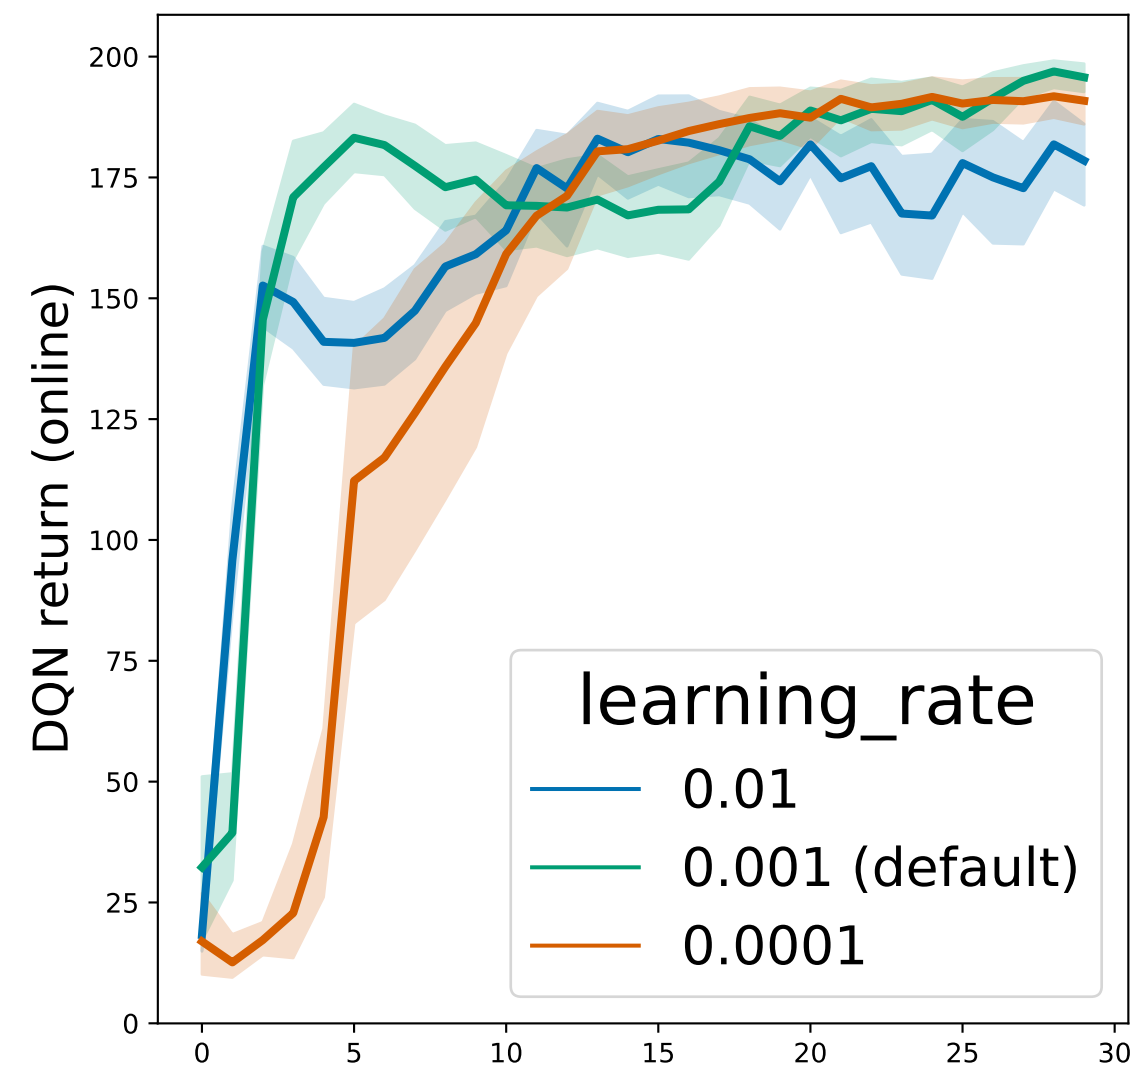

LunarLander

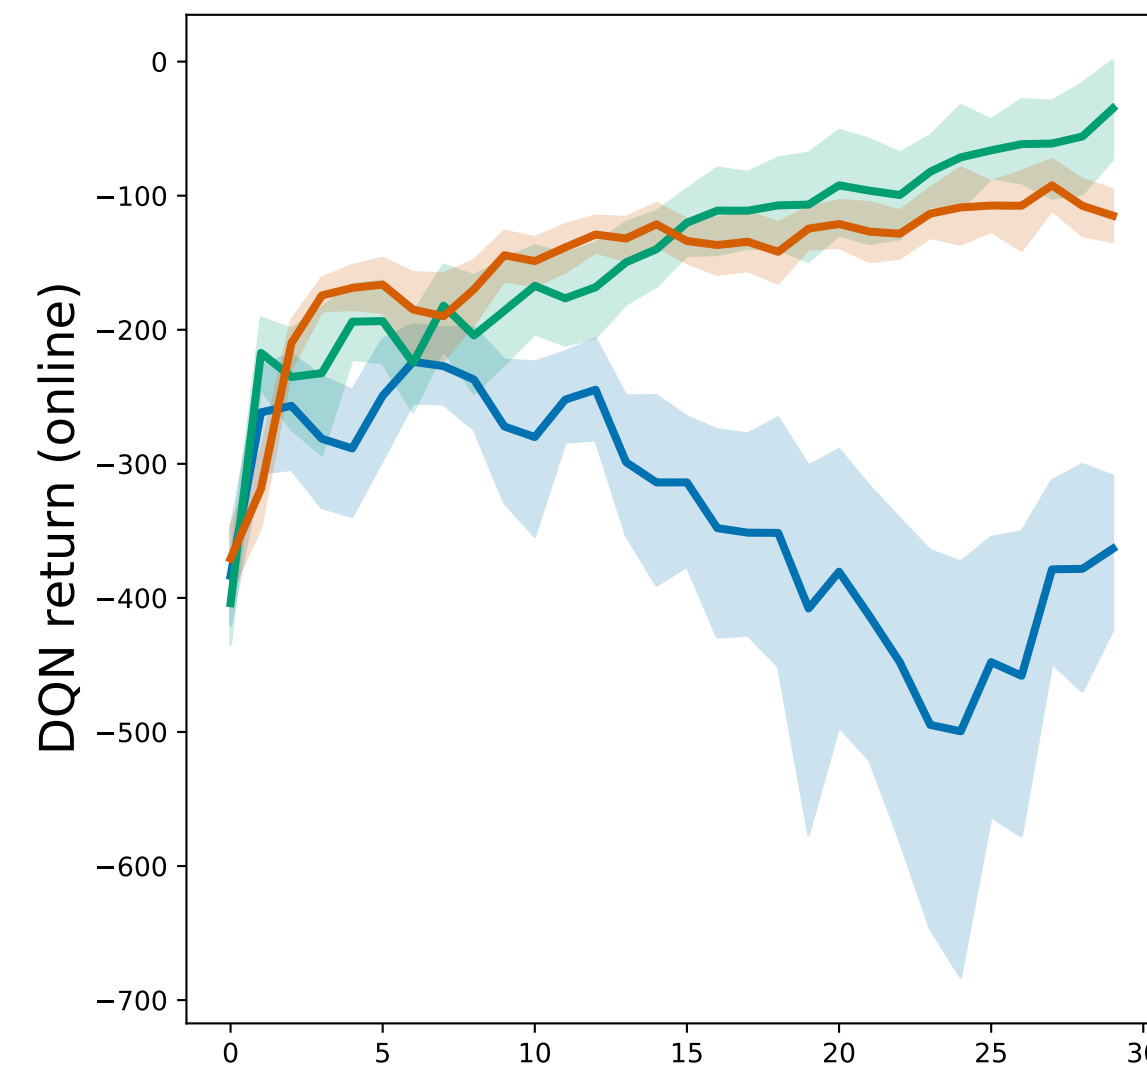

MountainCar

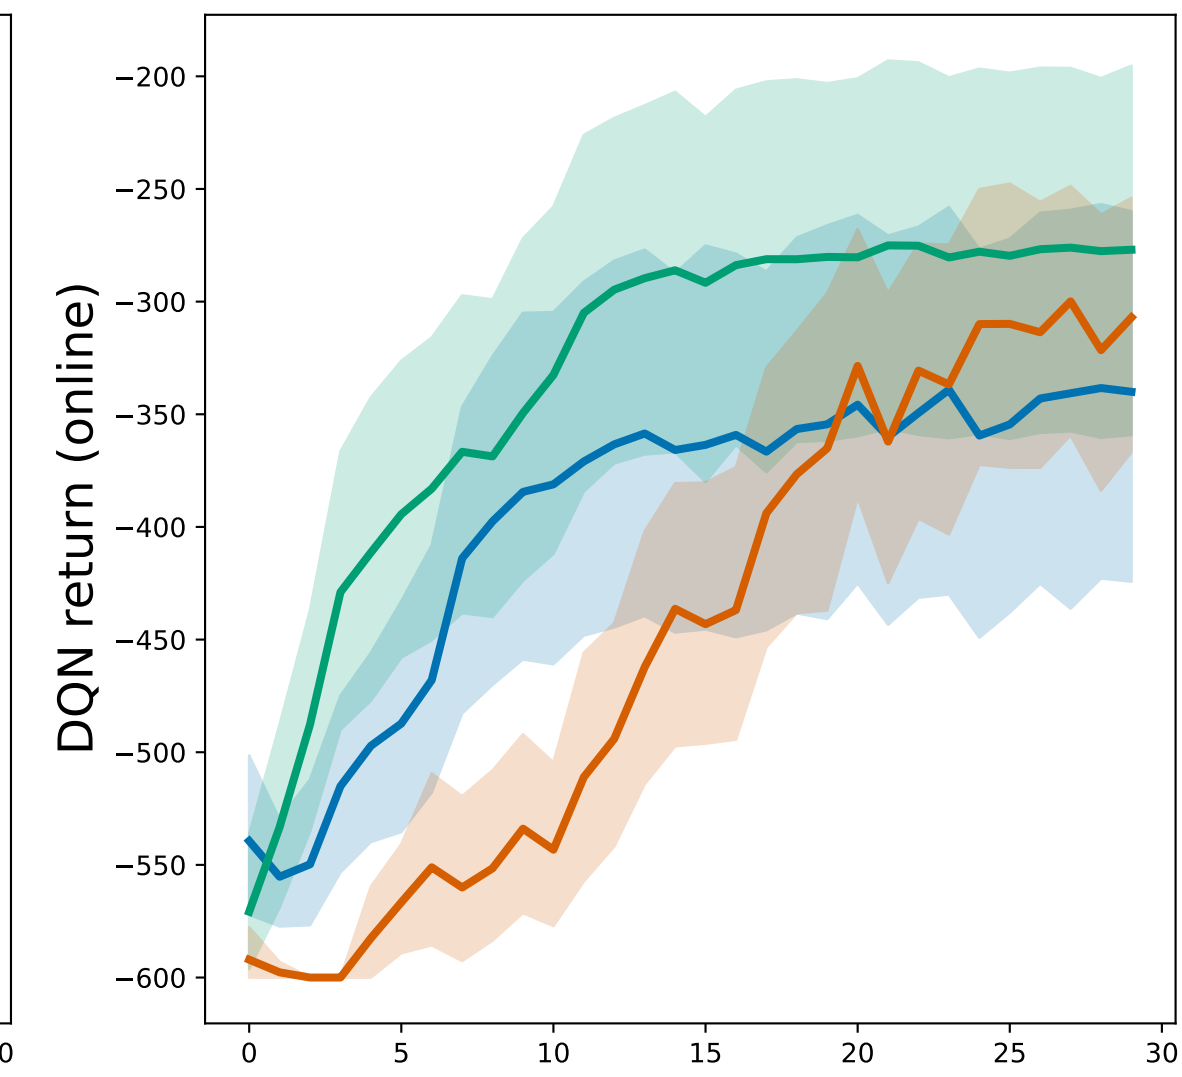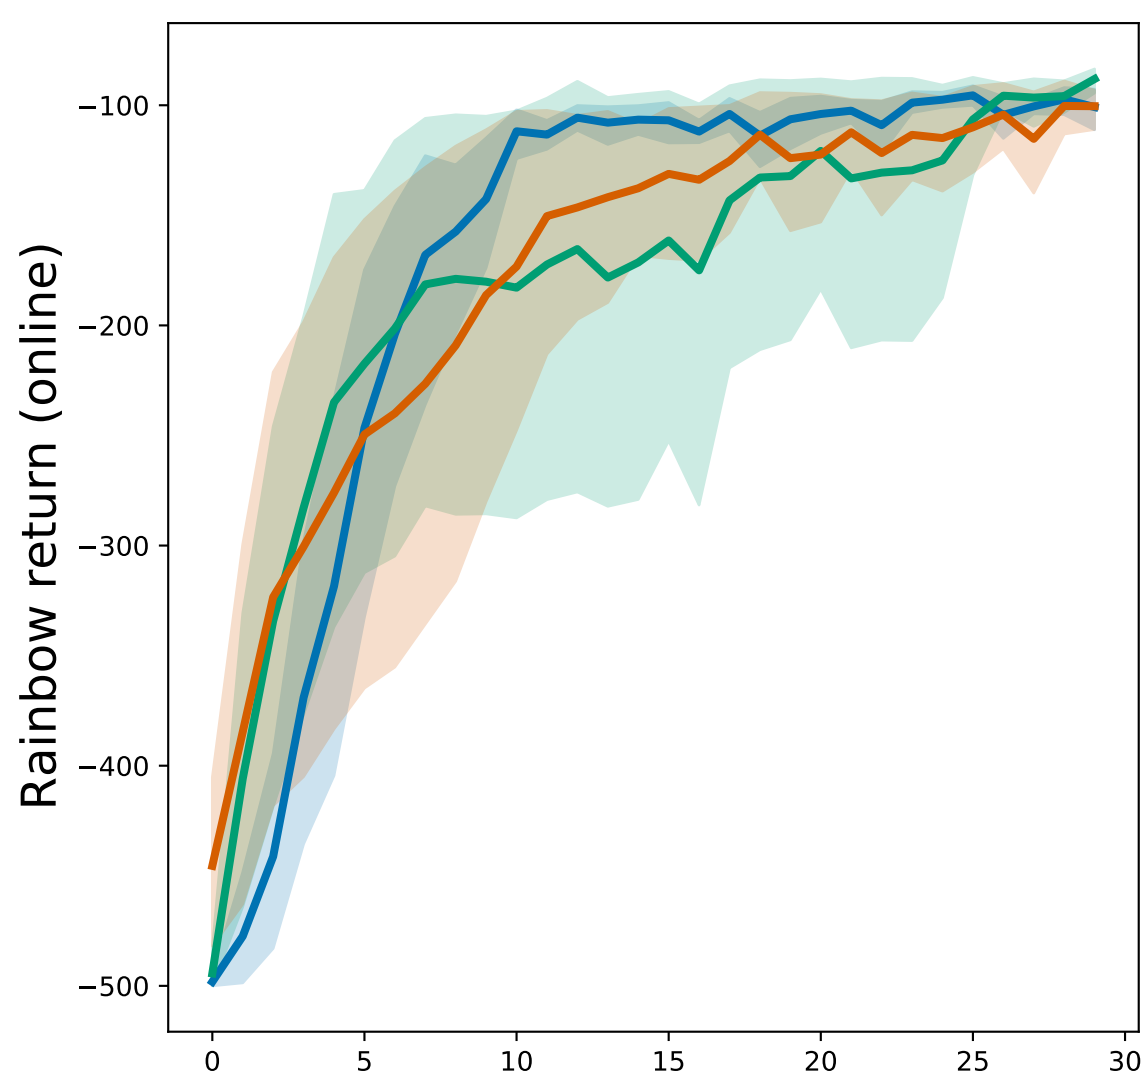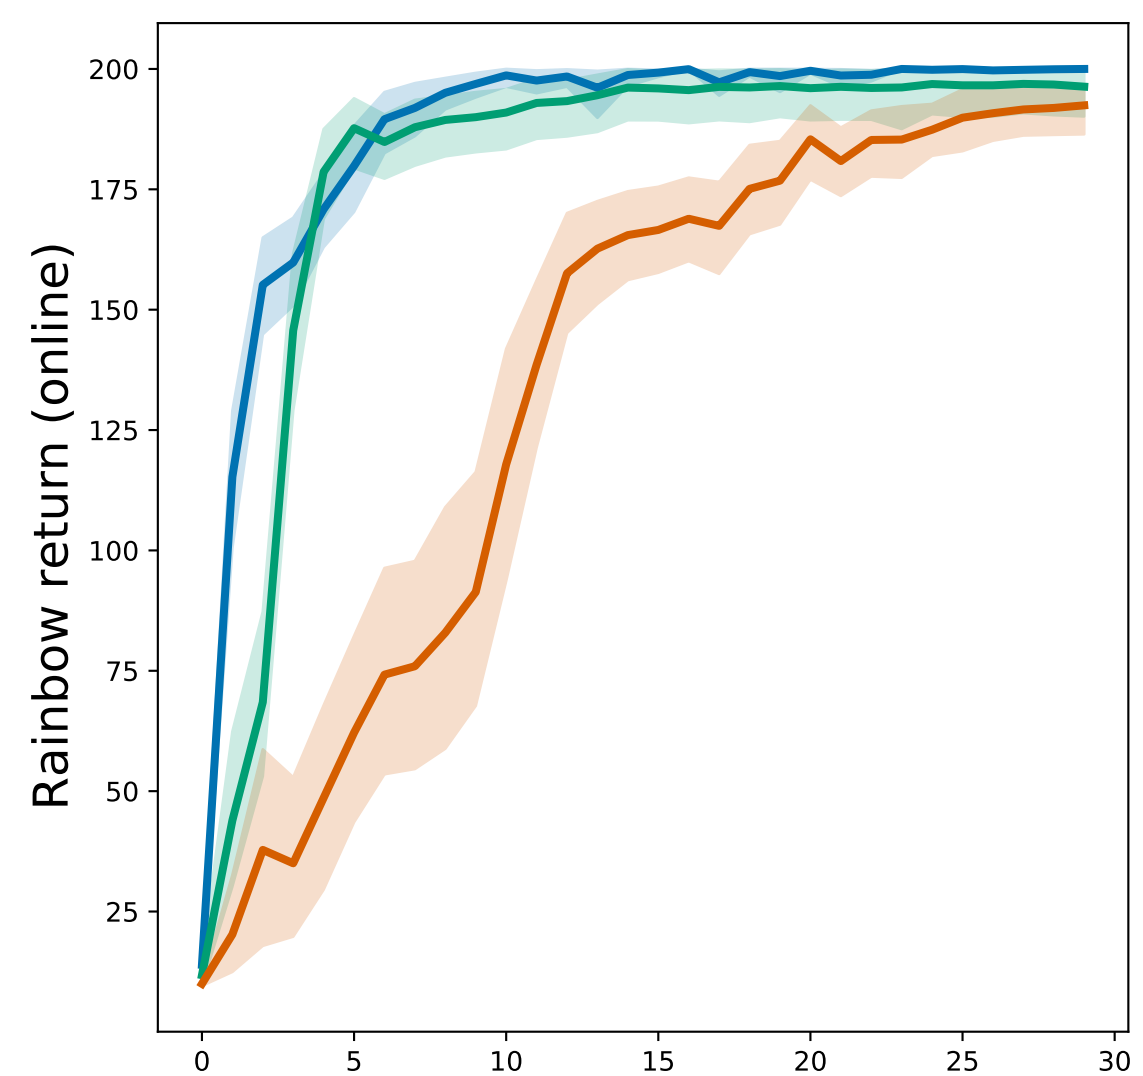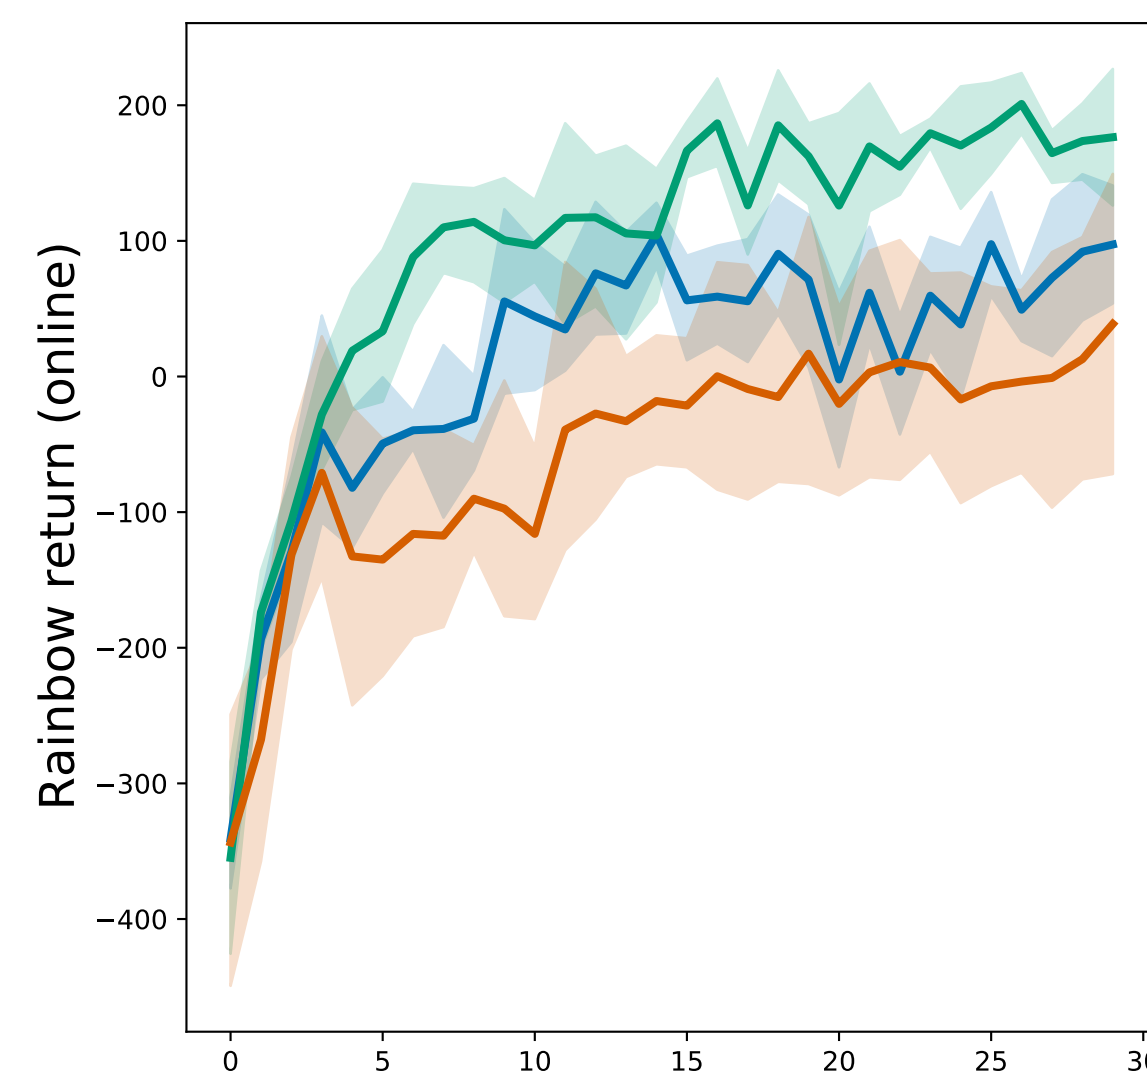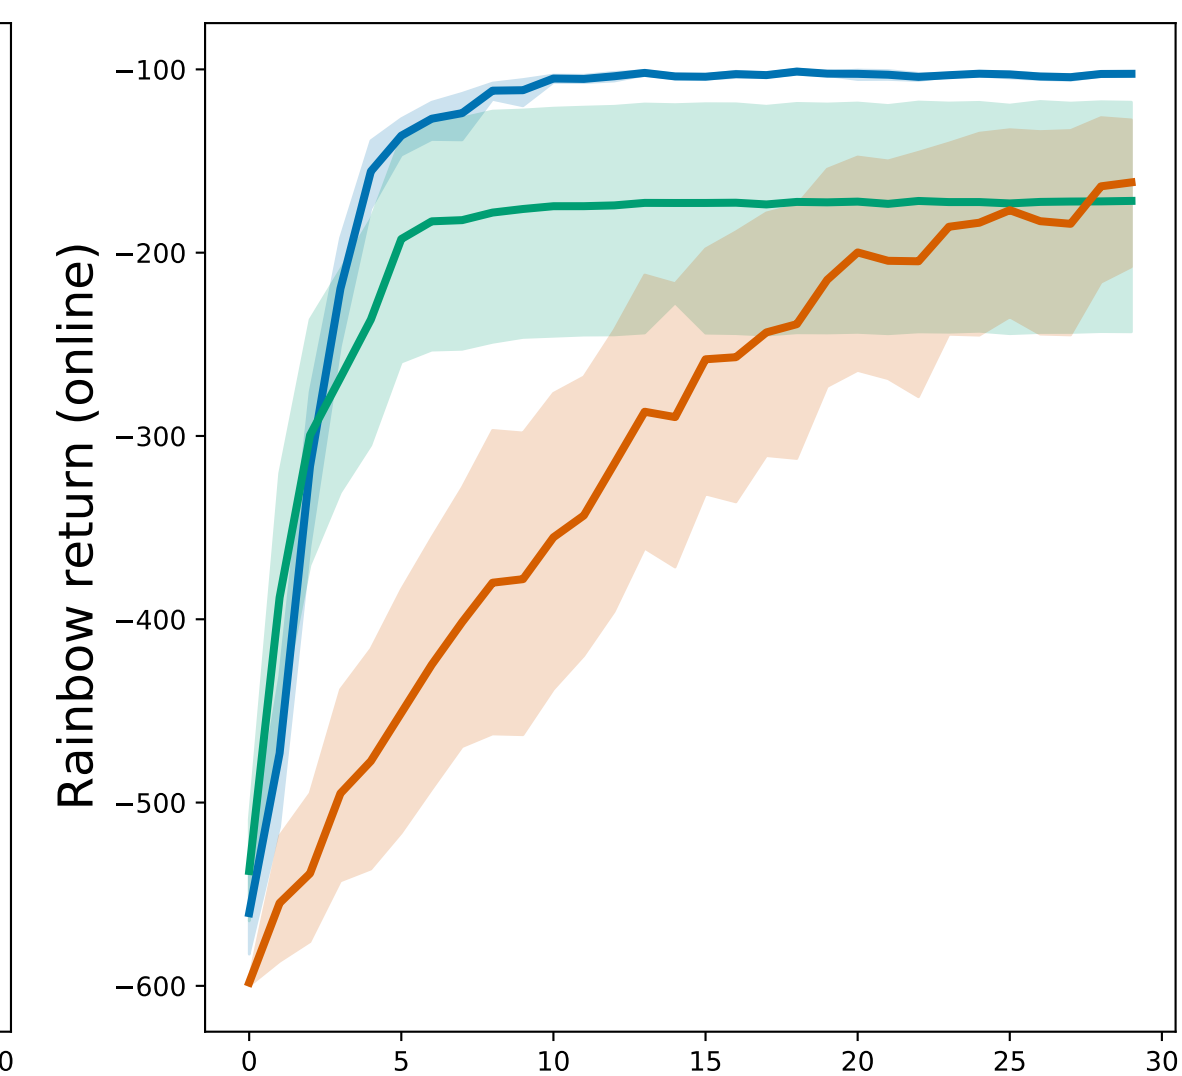

Supplement: supplementary_material [file attachment]

Acrobot

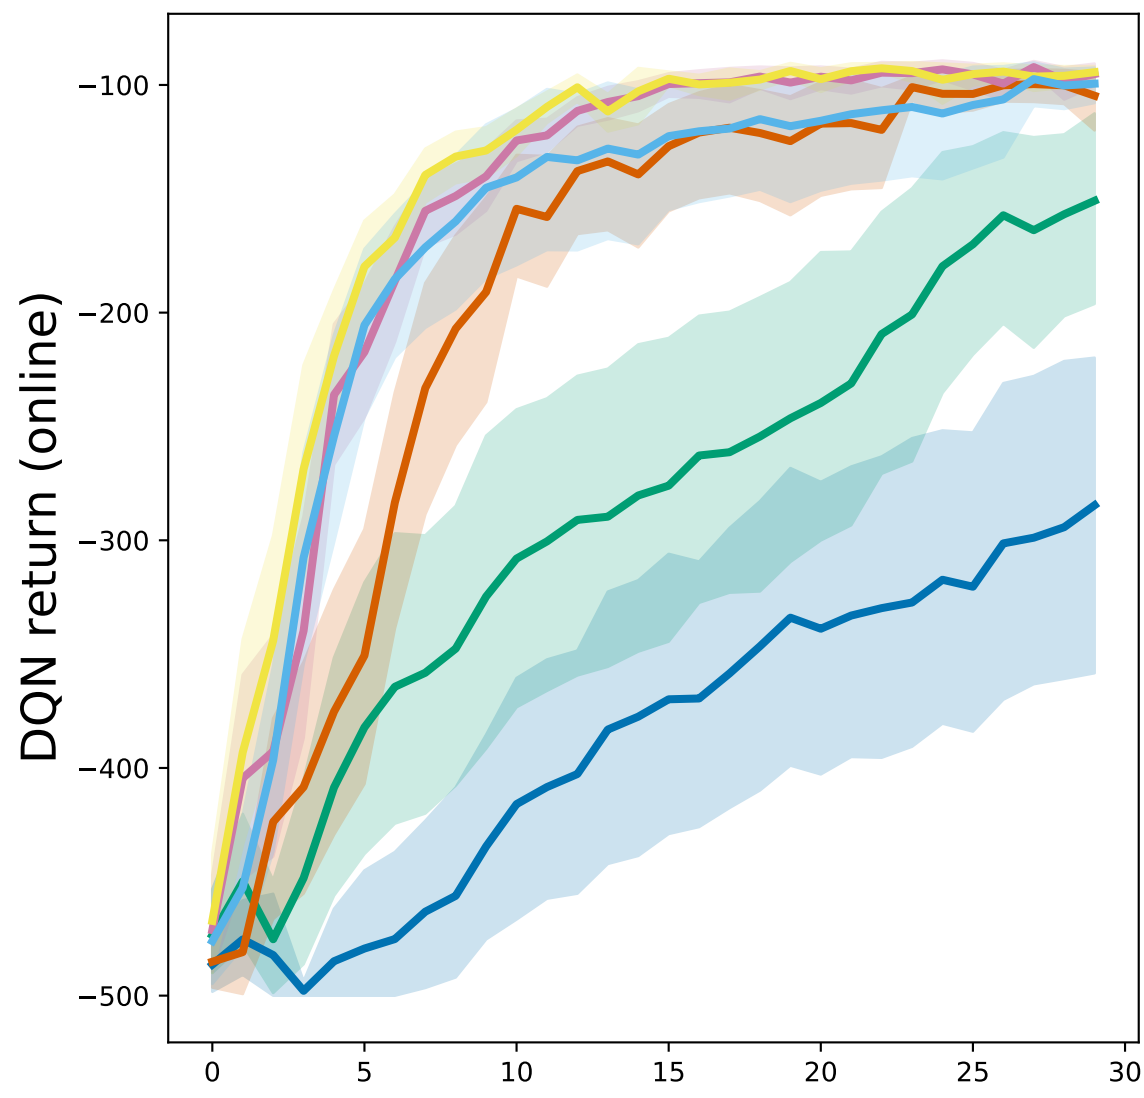

CartPole

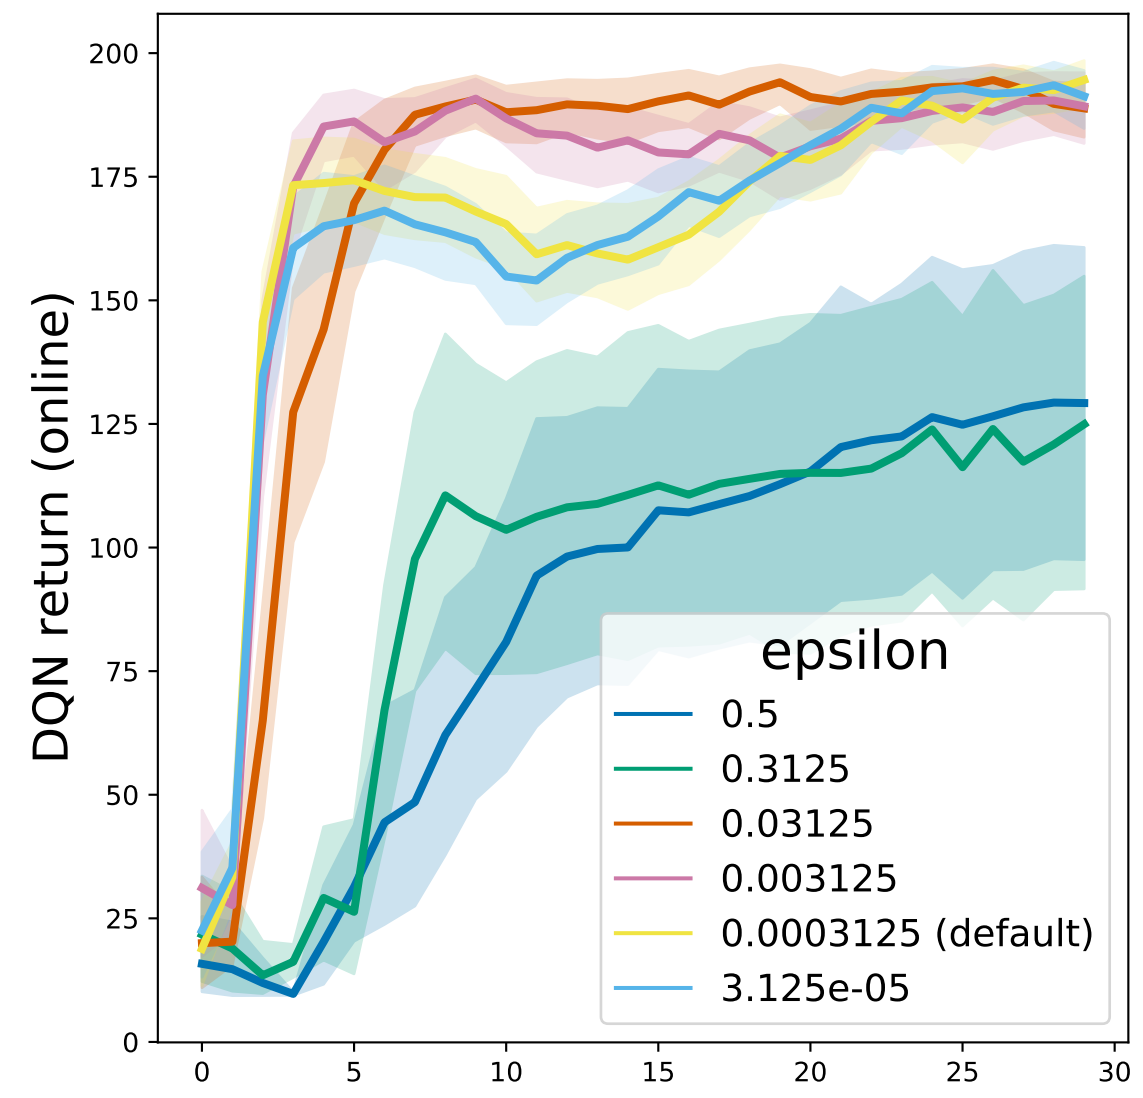

LunarLander

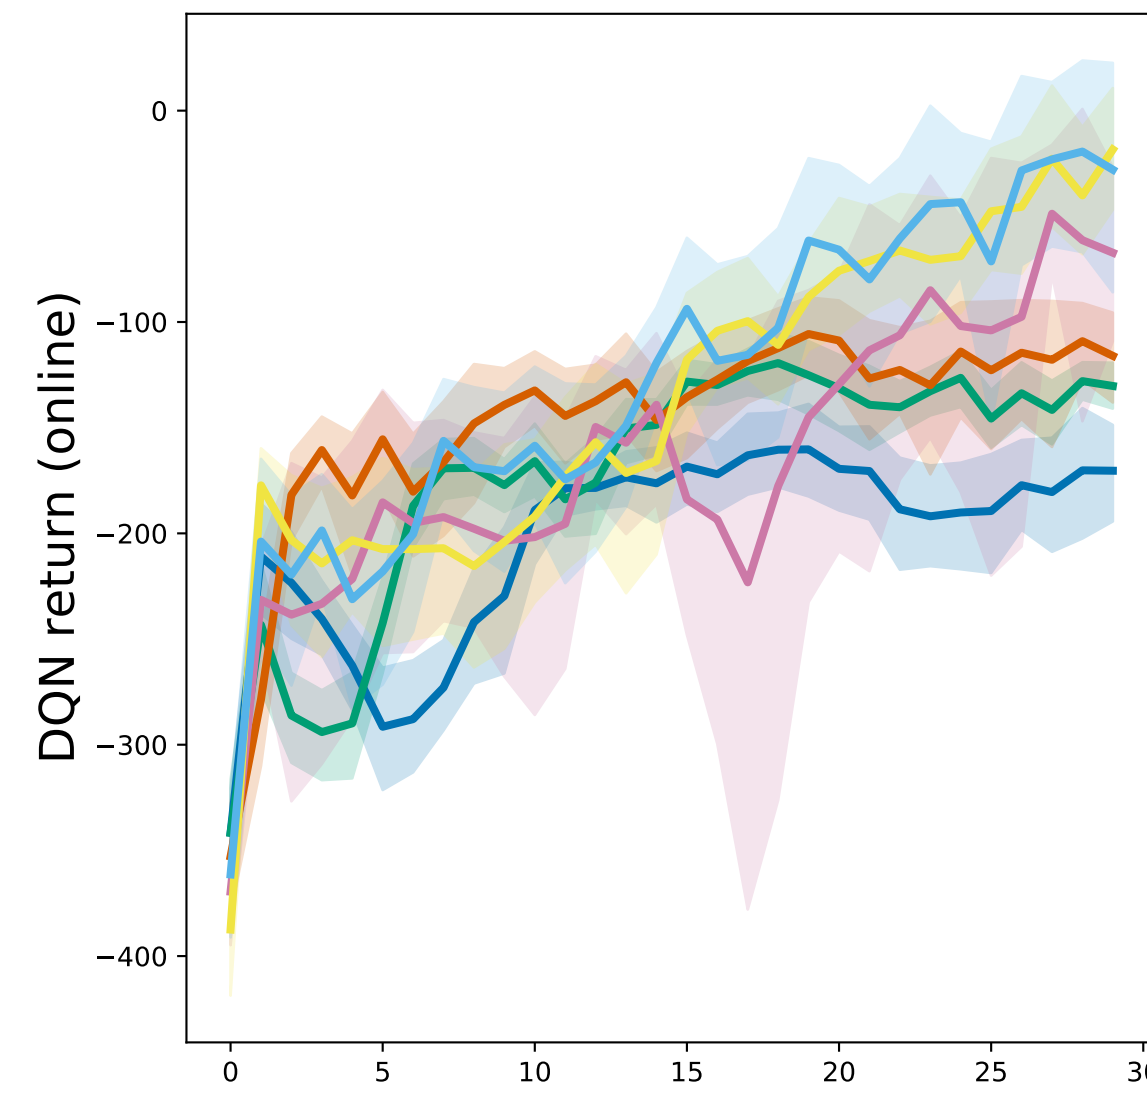

MountainCar

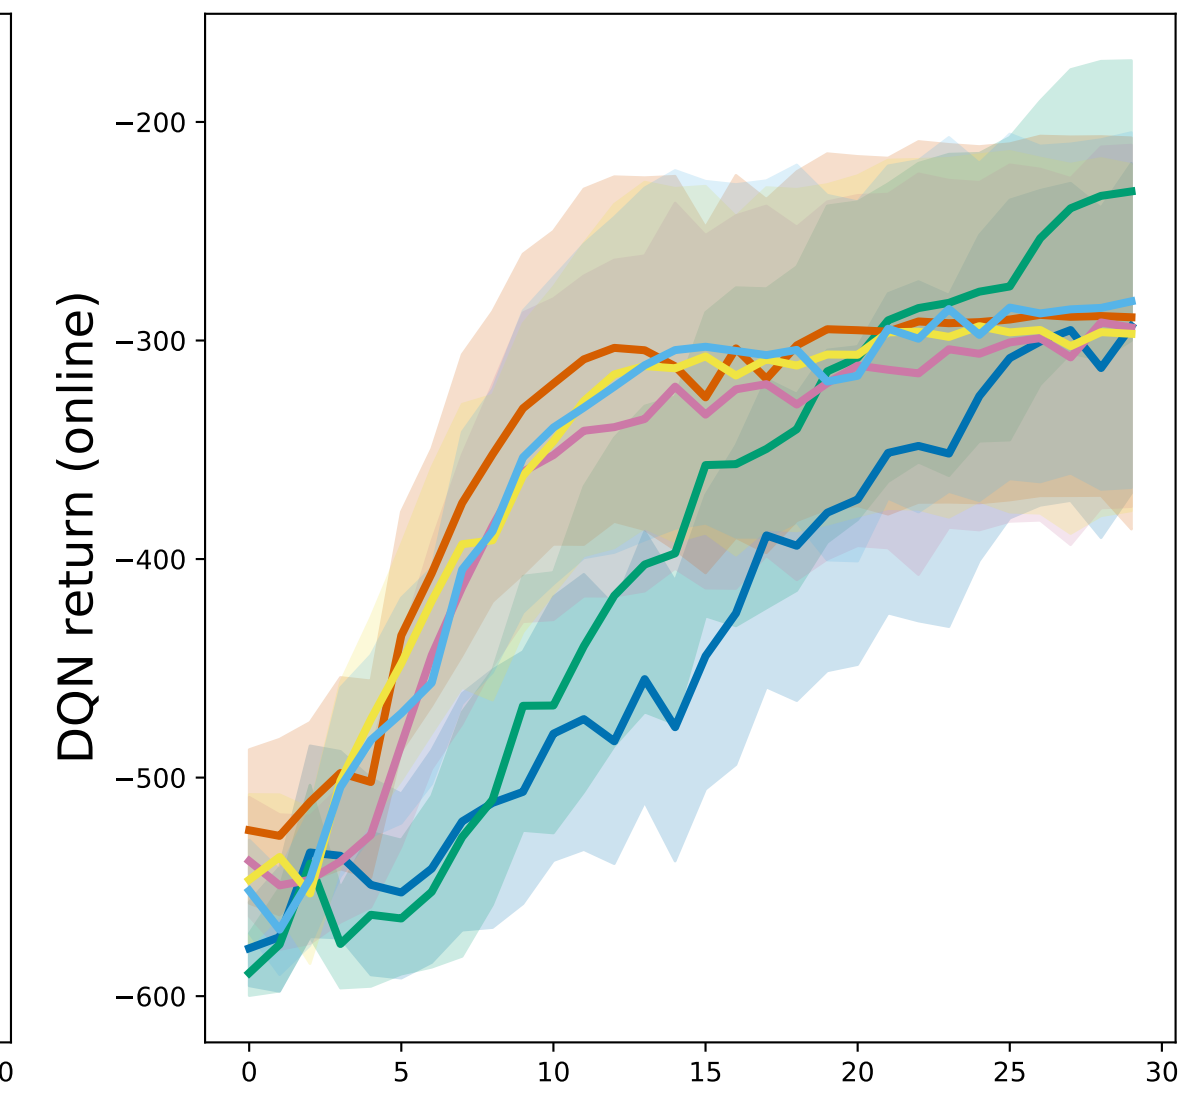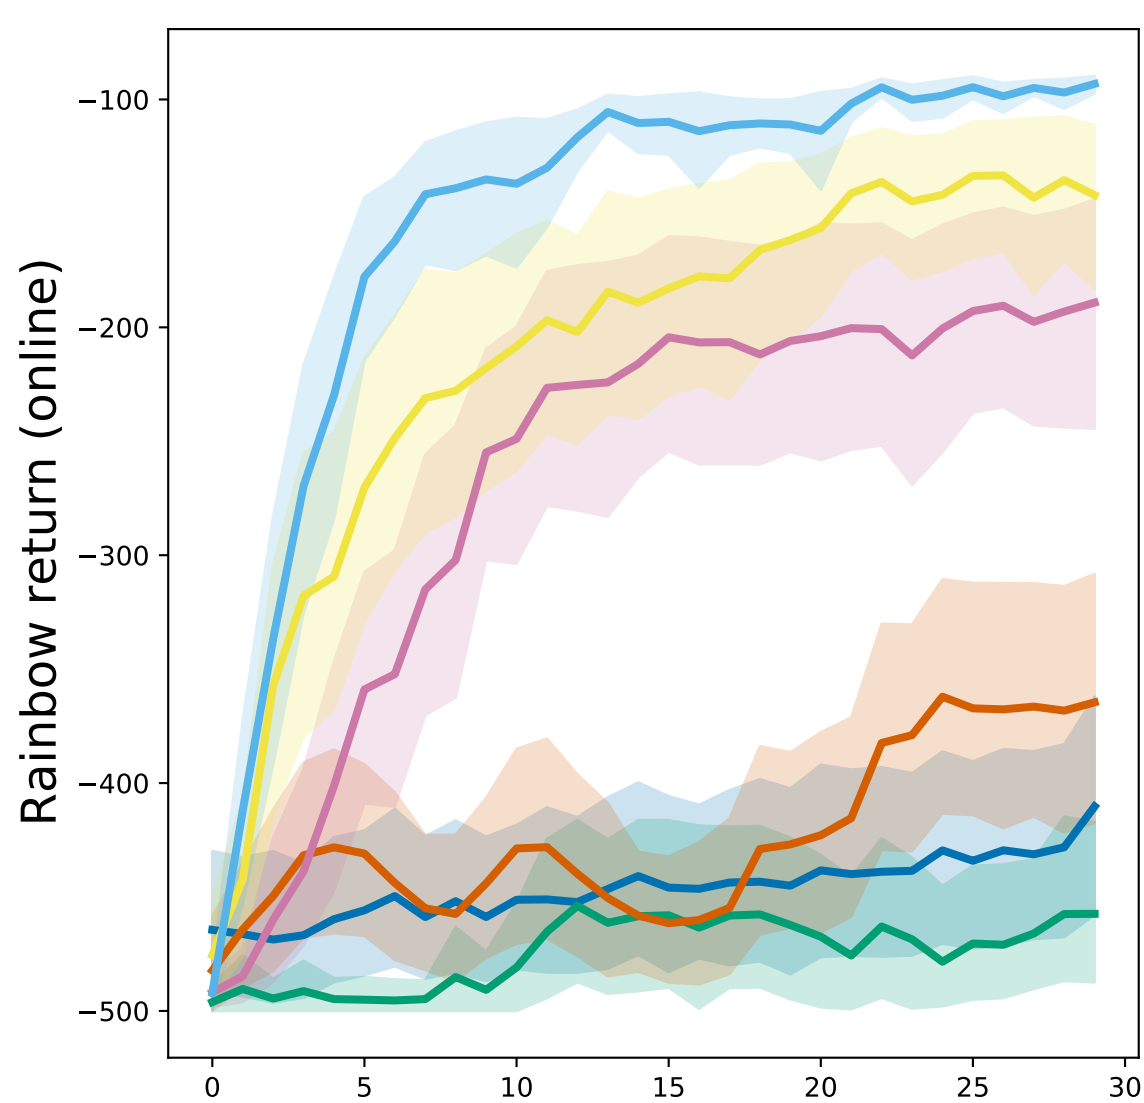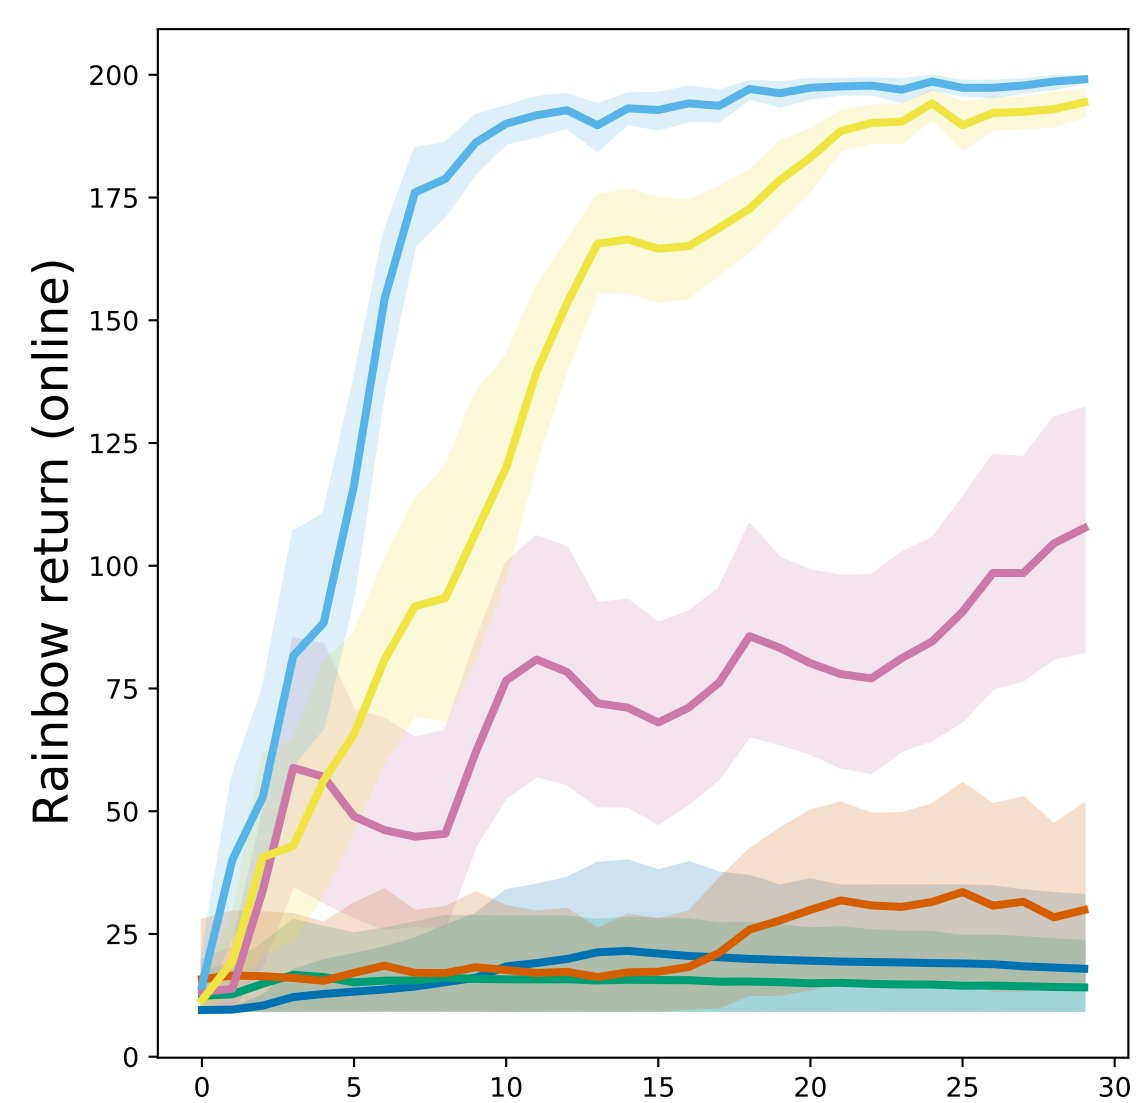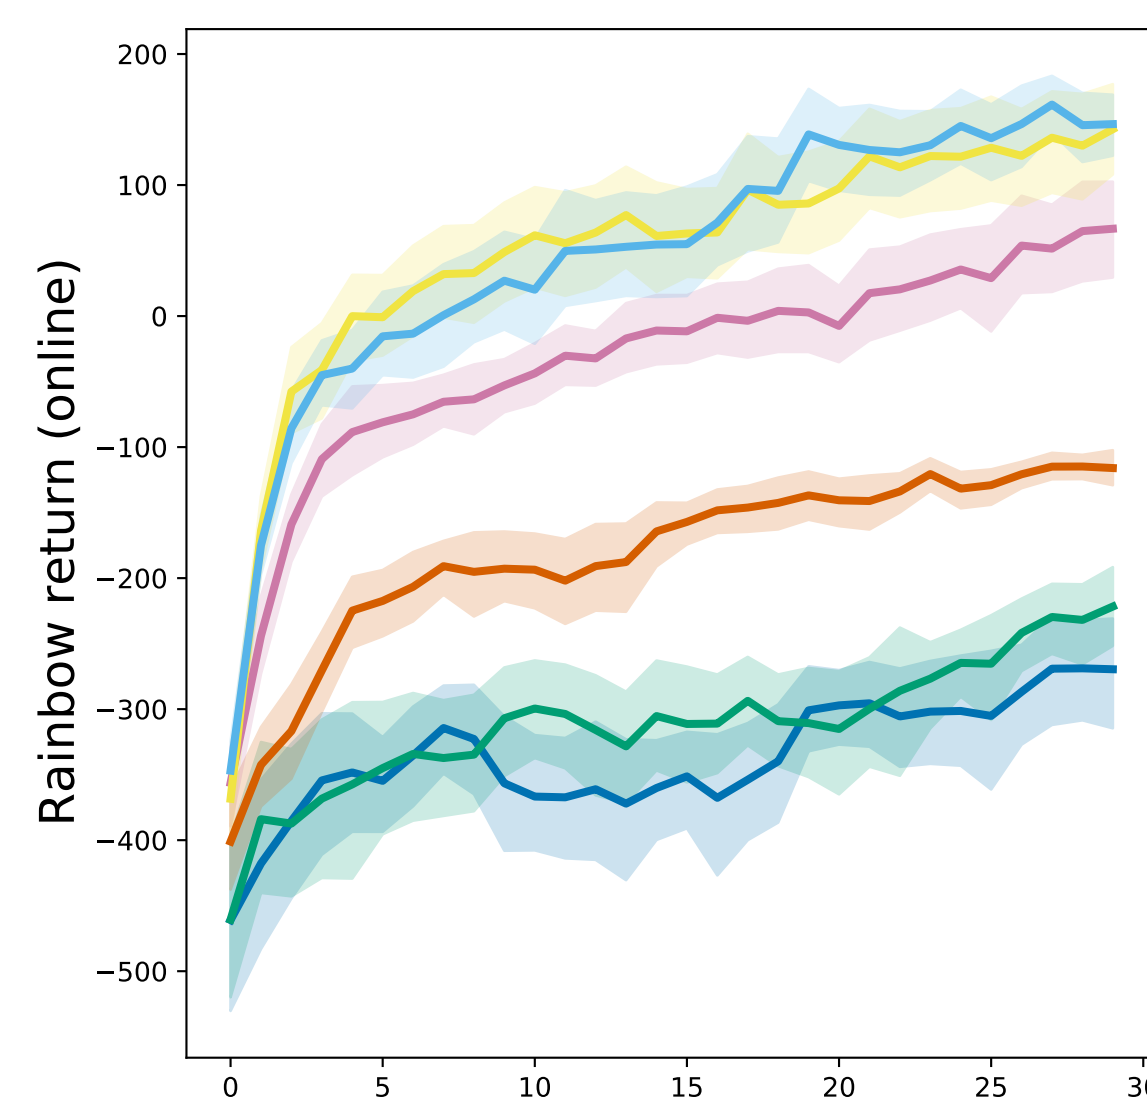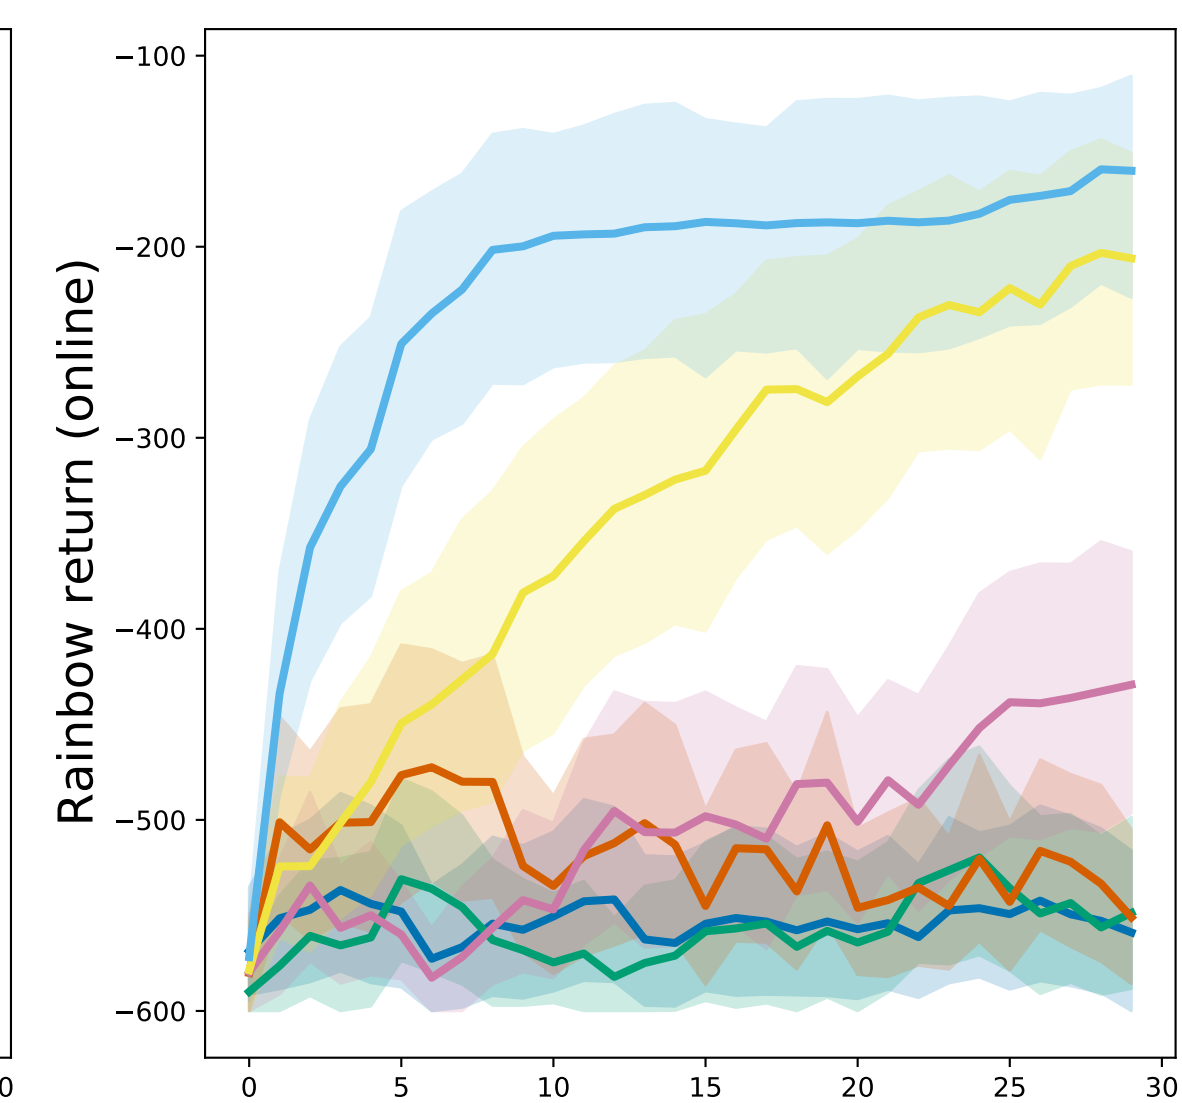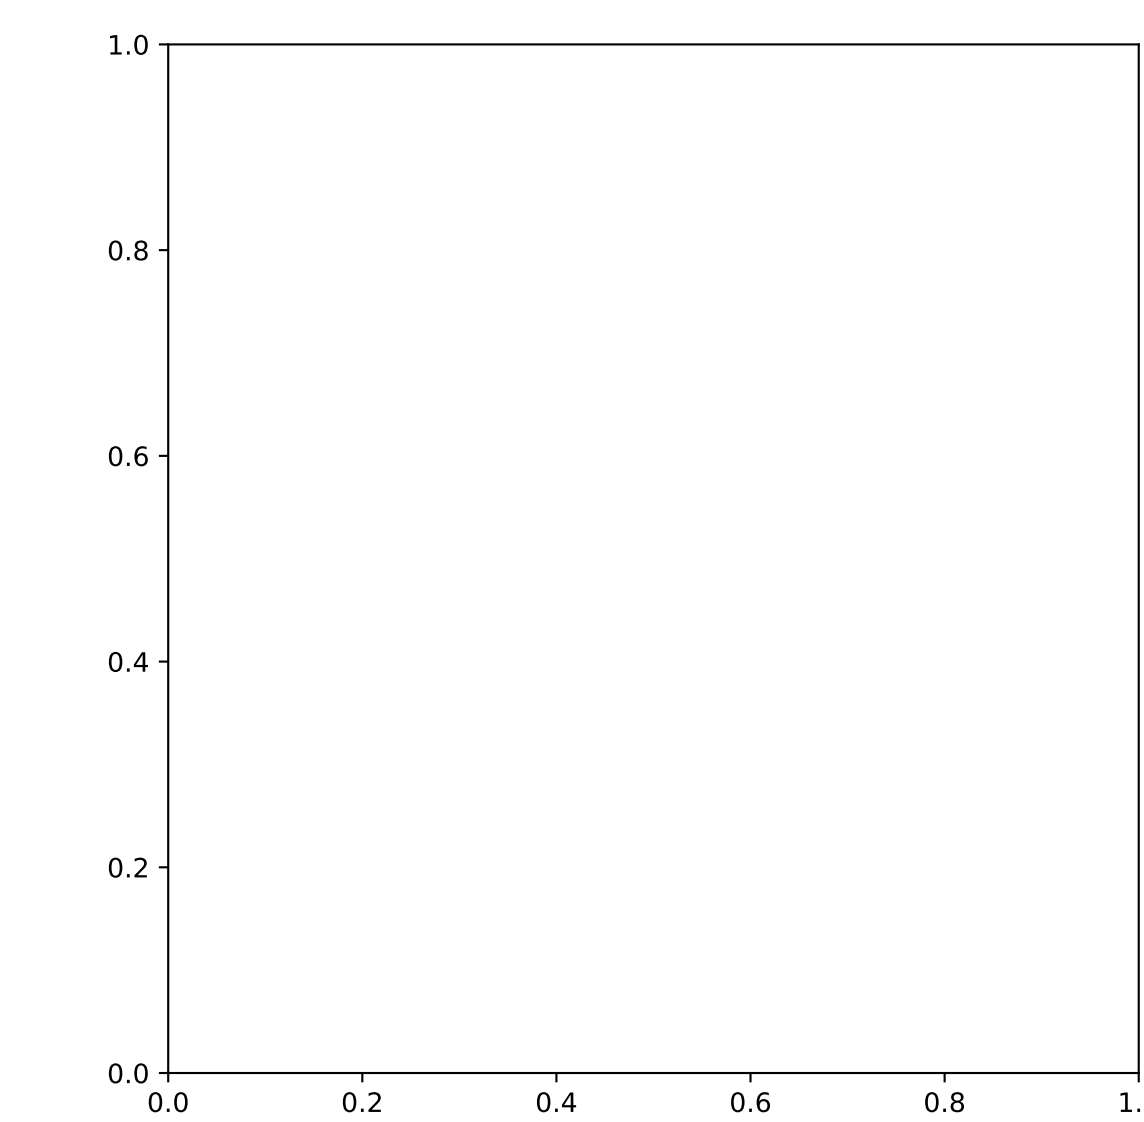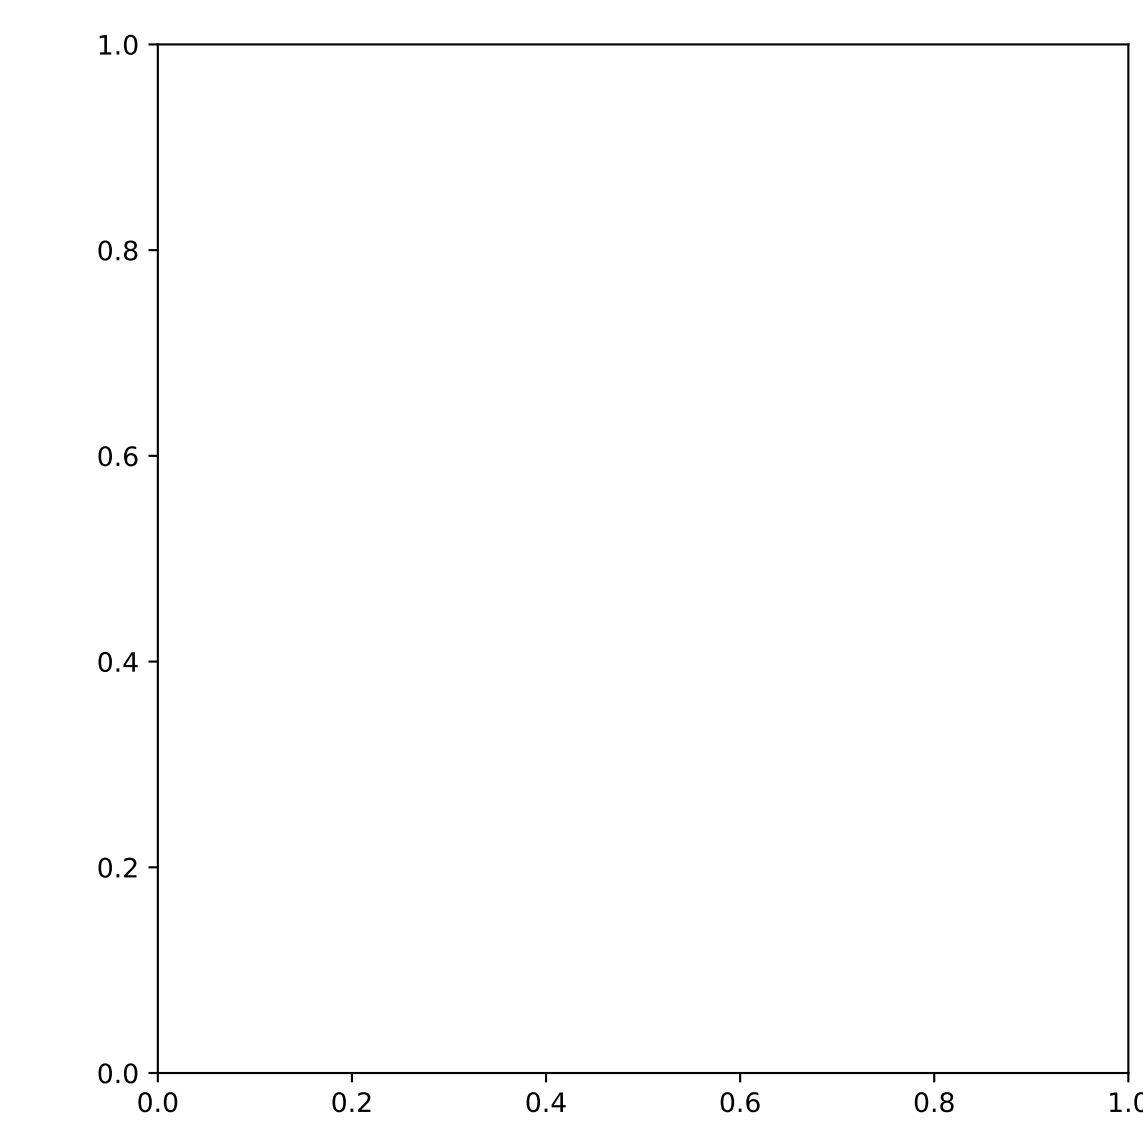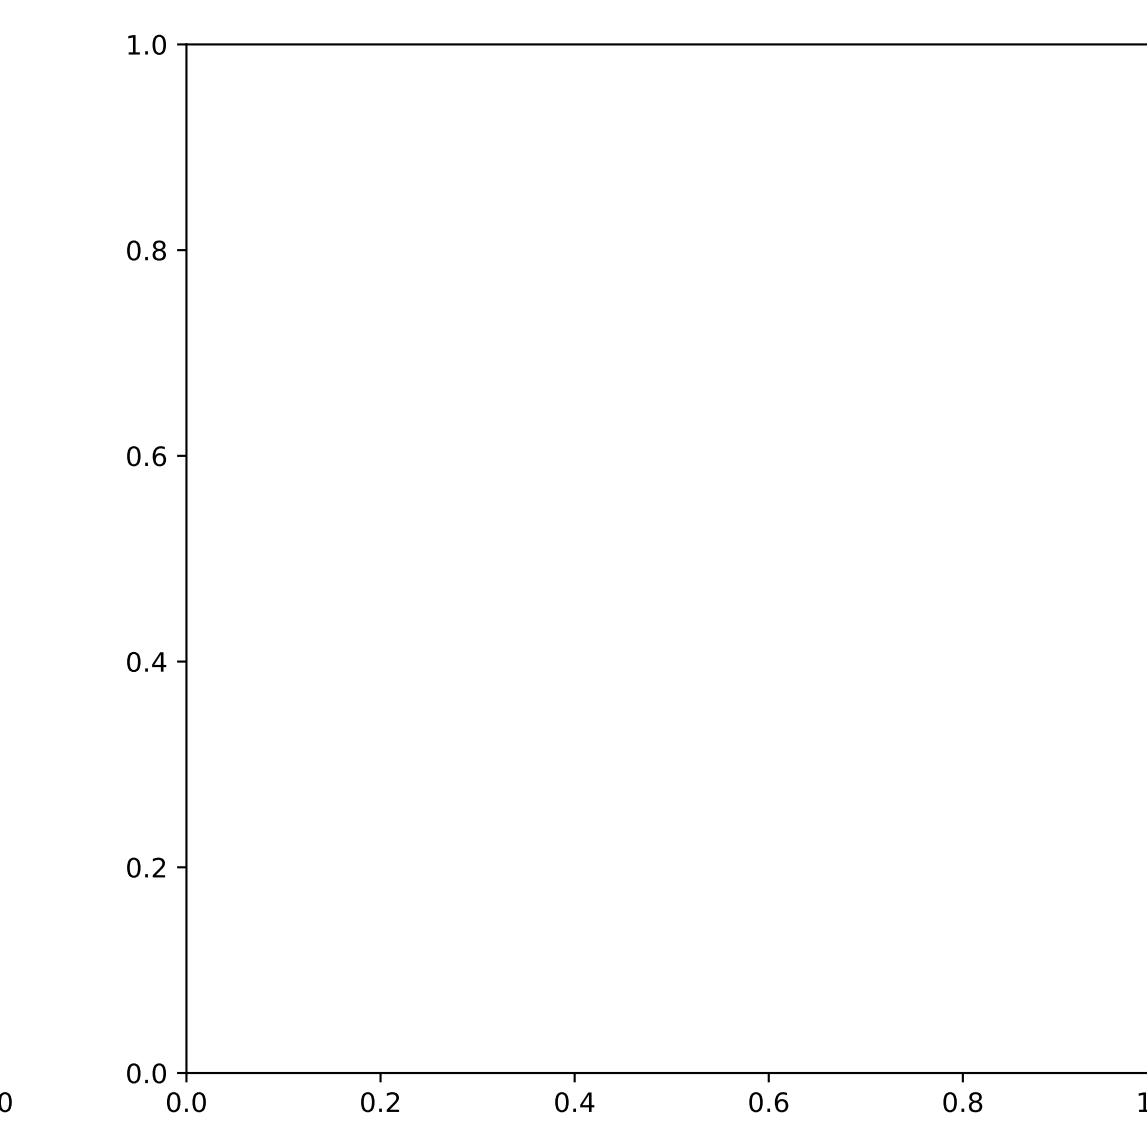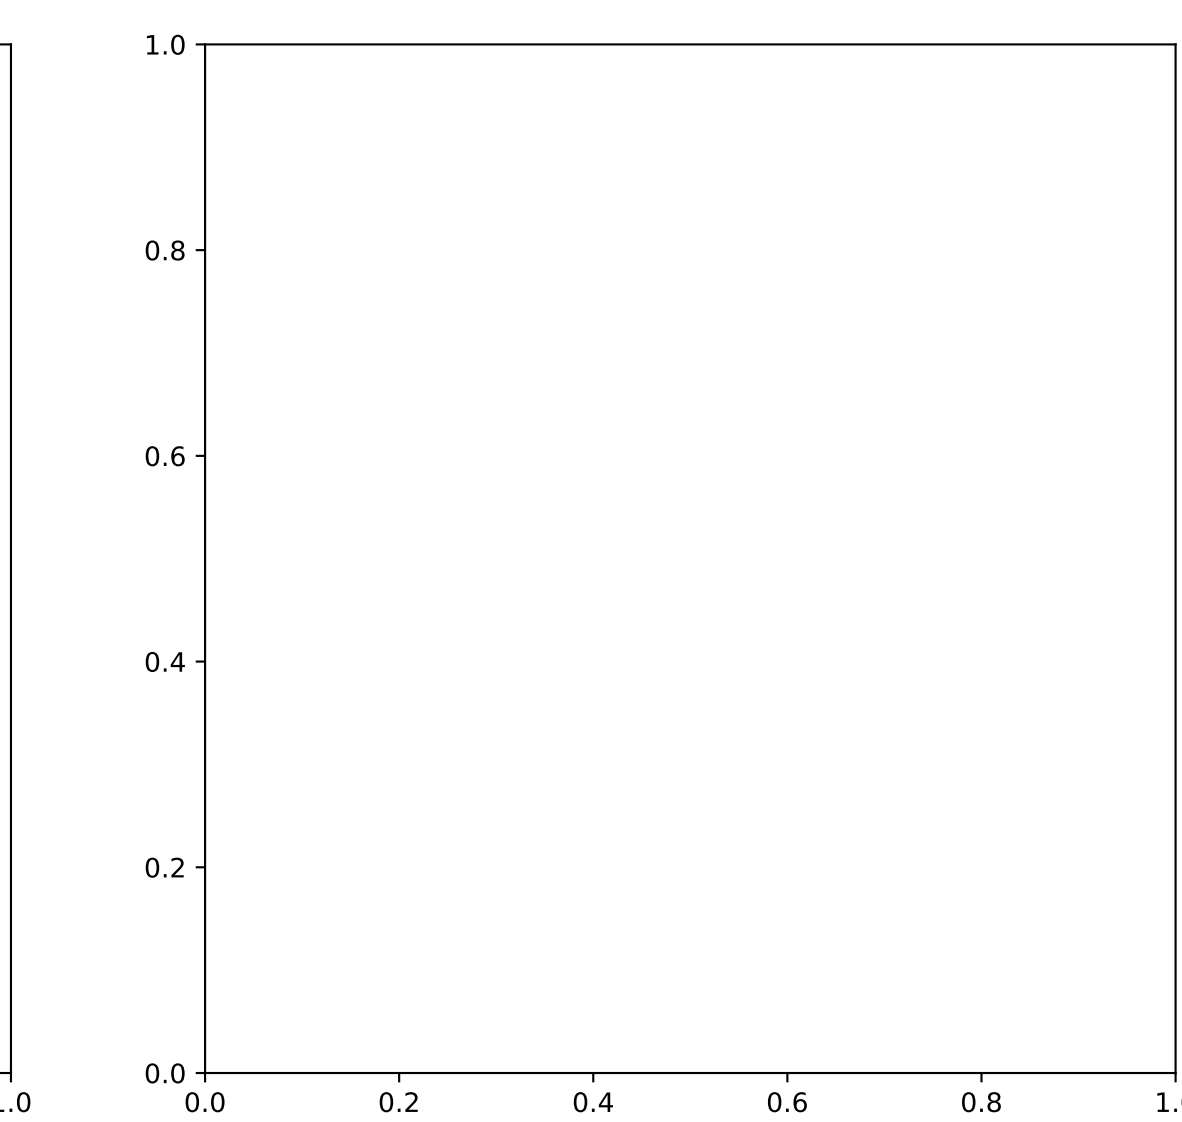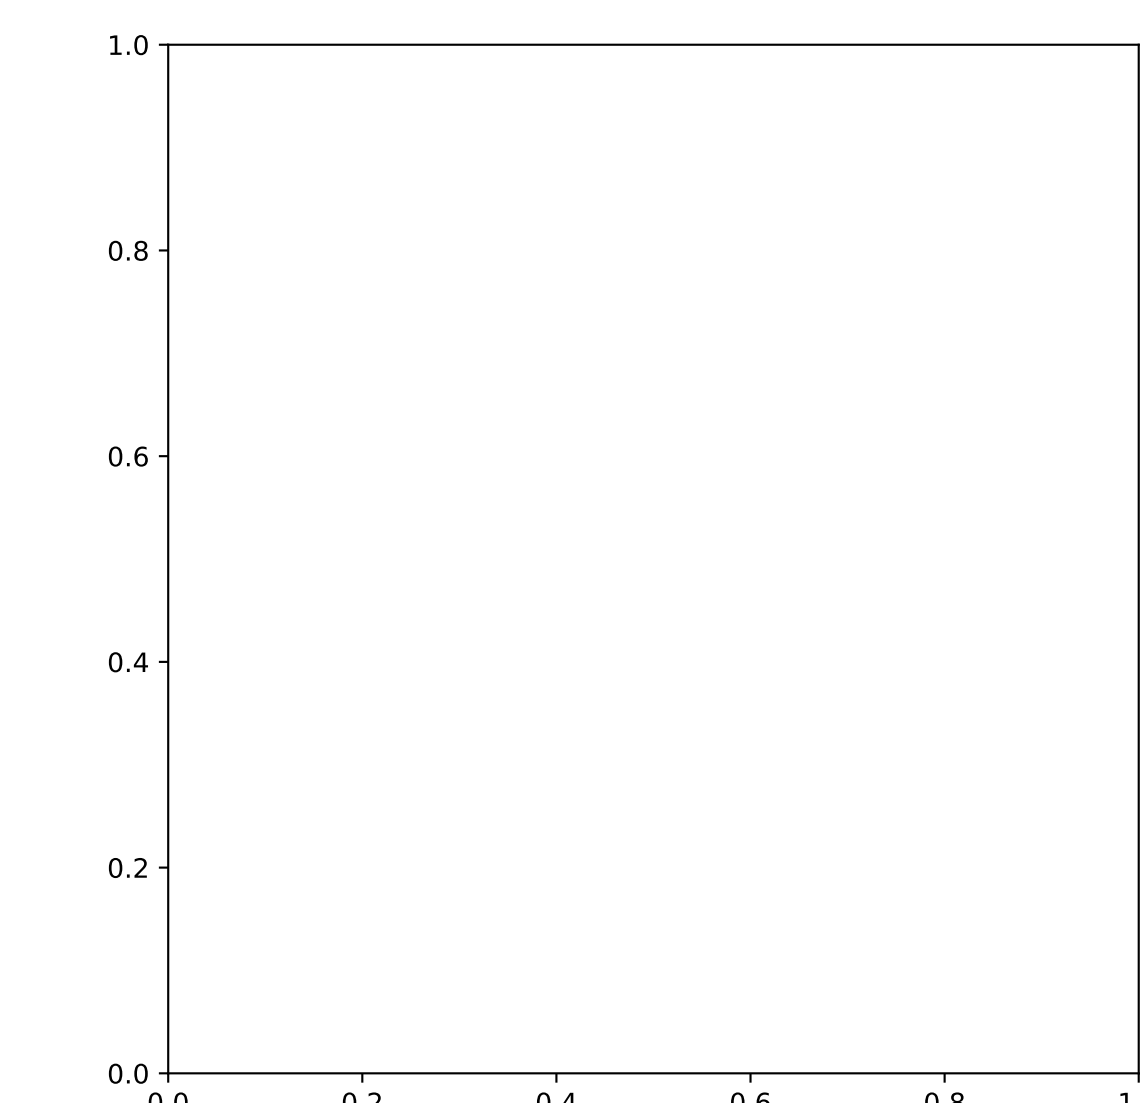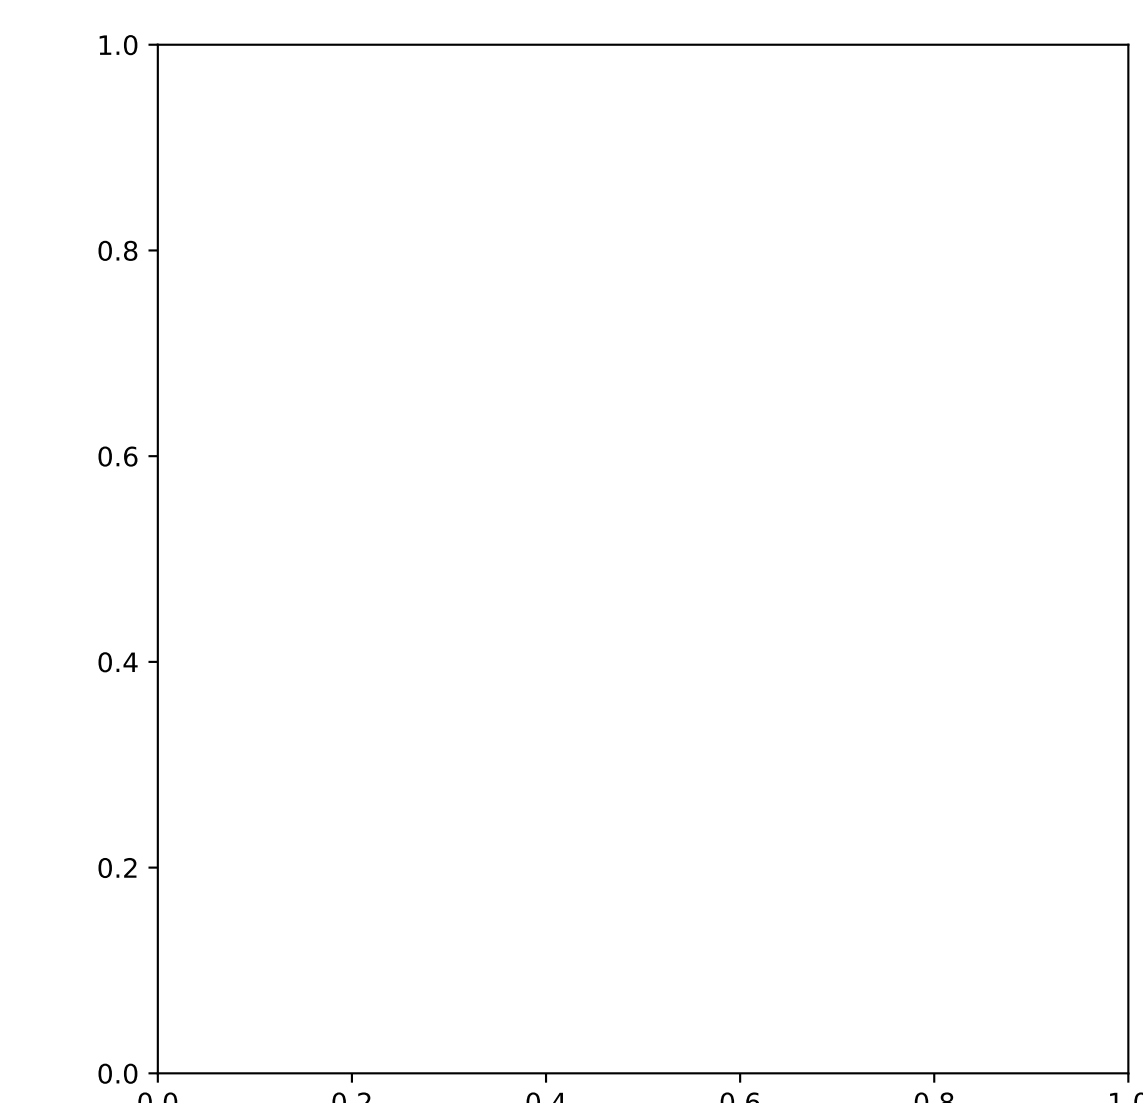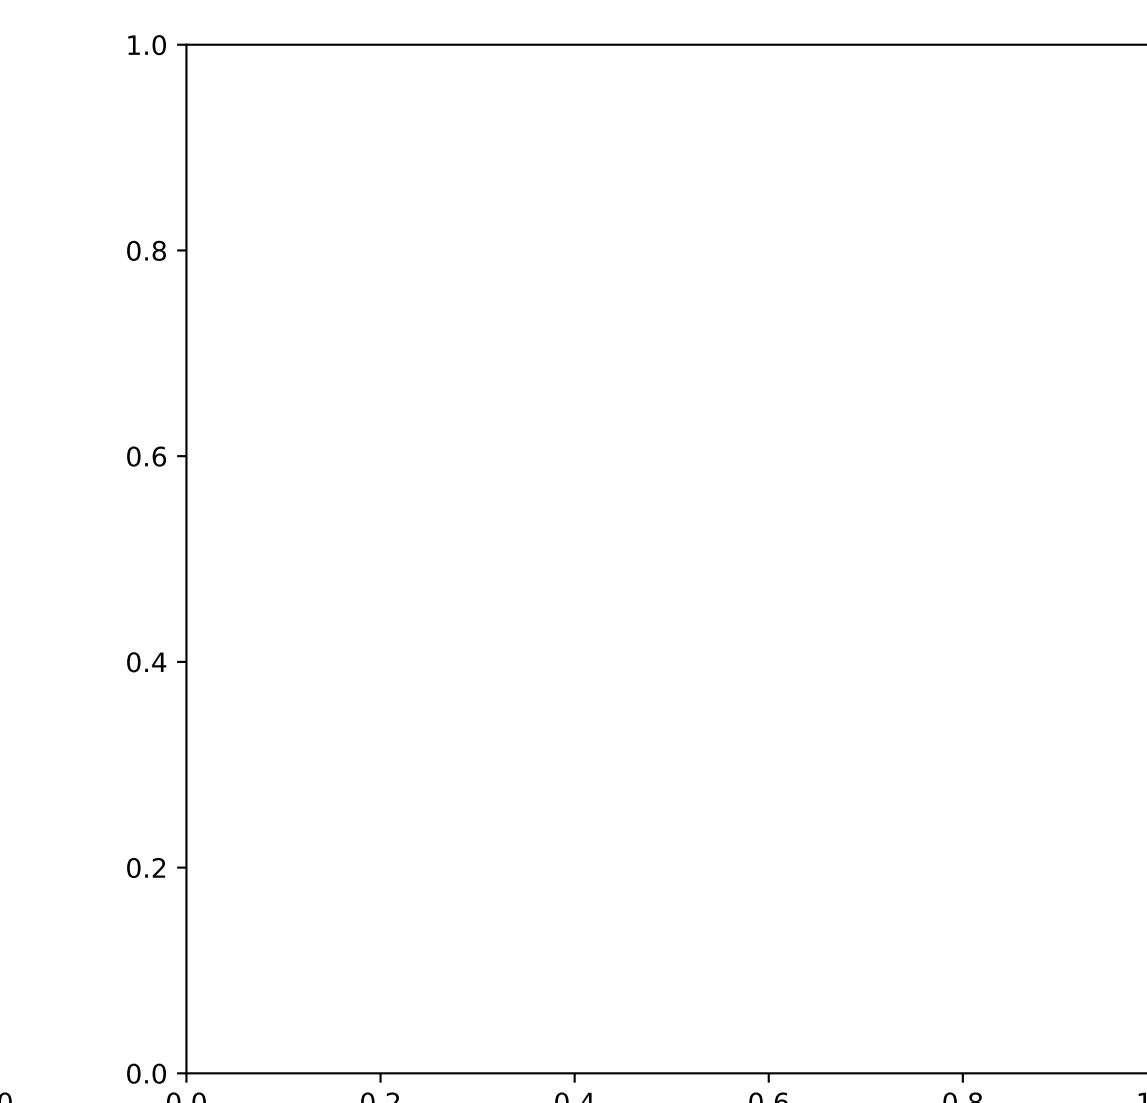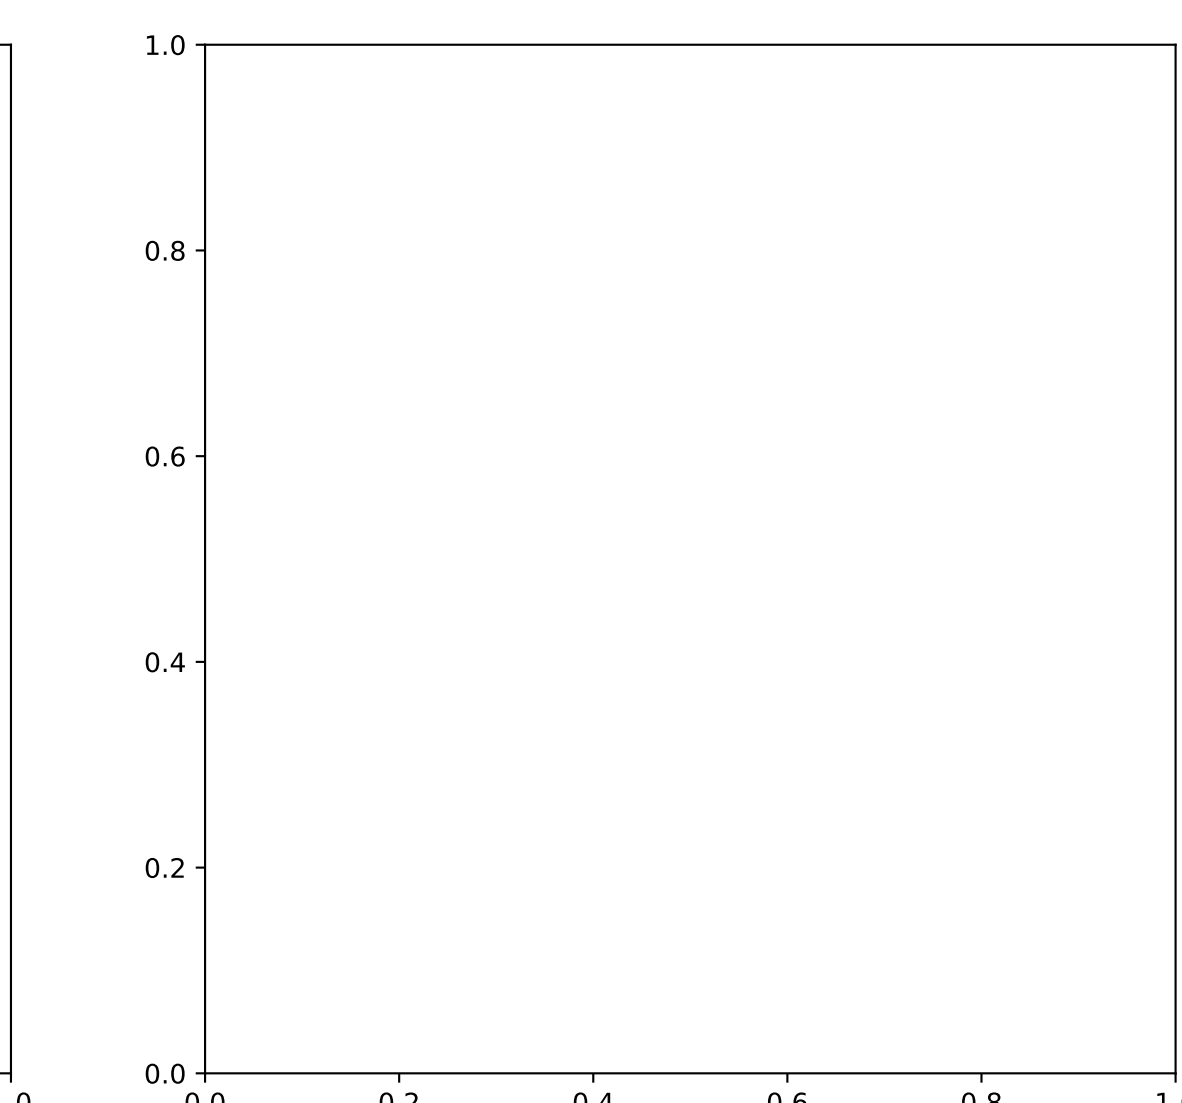

Supplement: supplementary_material [file attachment]

Acrobot

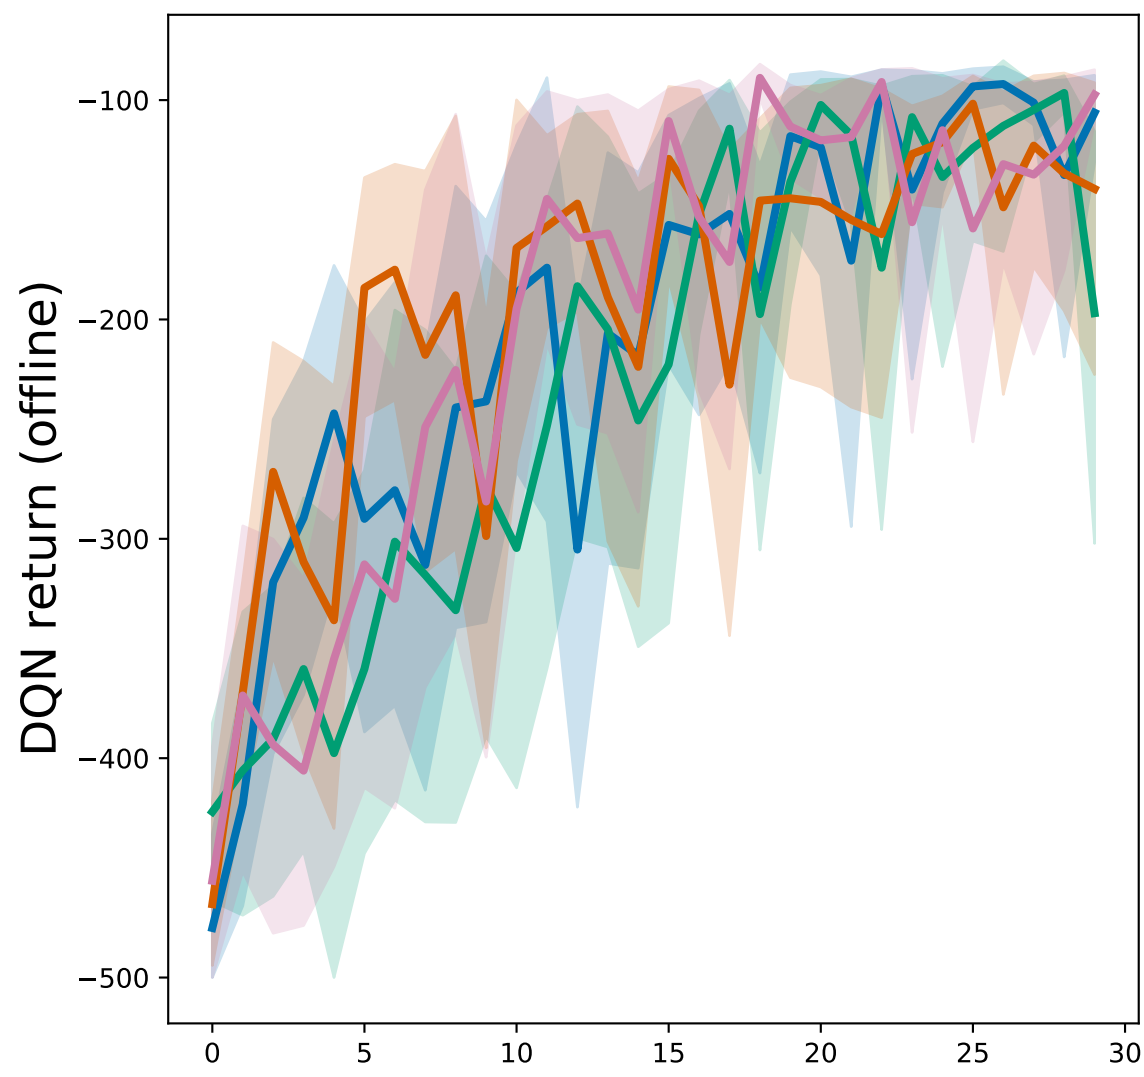

CartPole

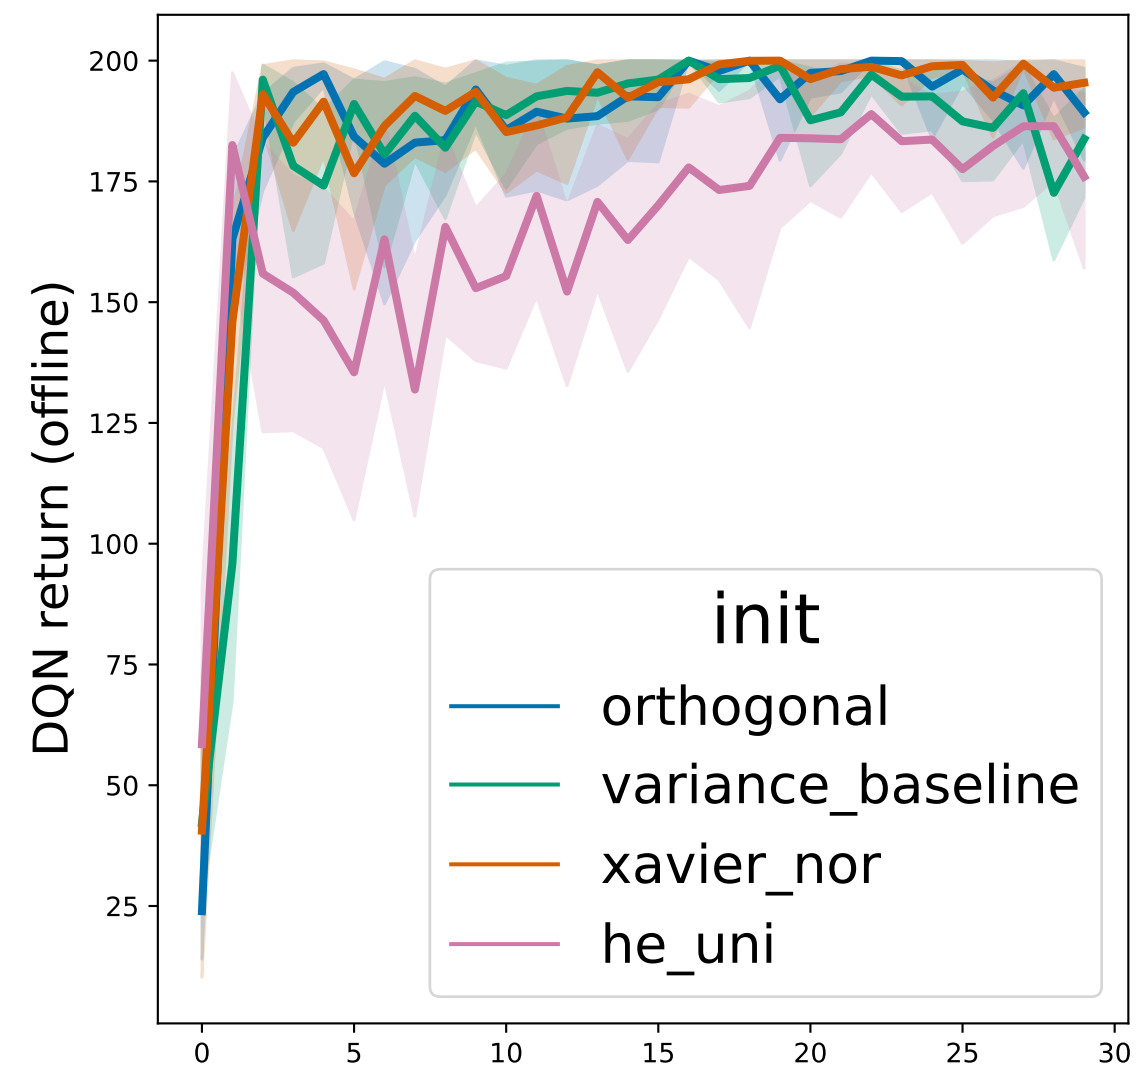

LunarLander

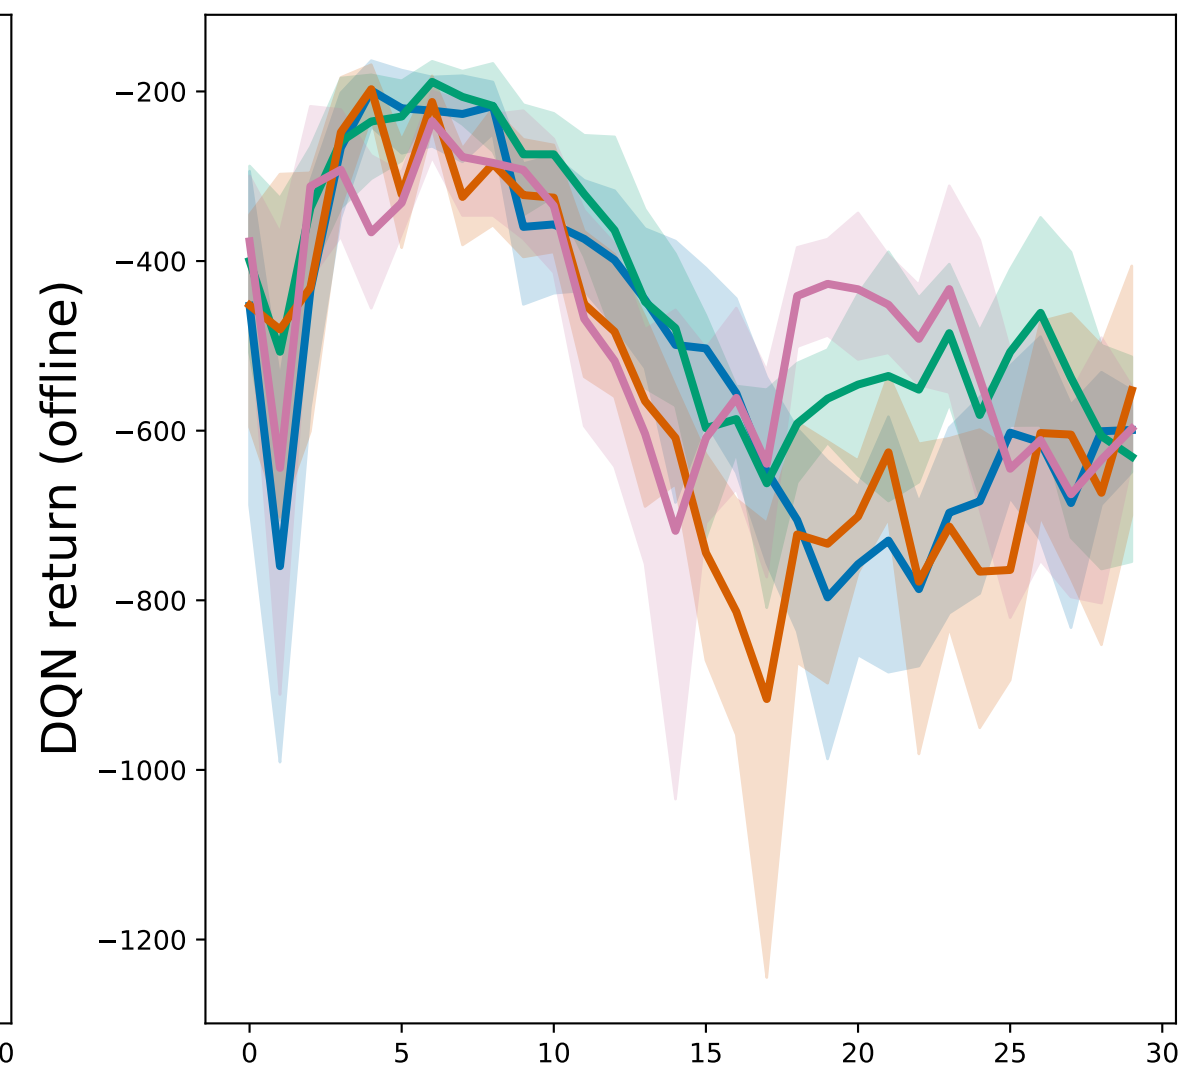

MountainCar

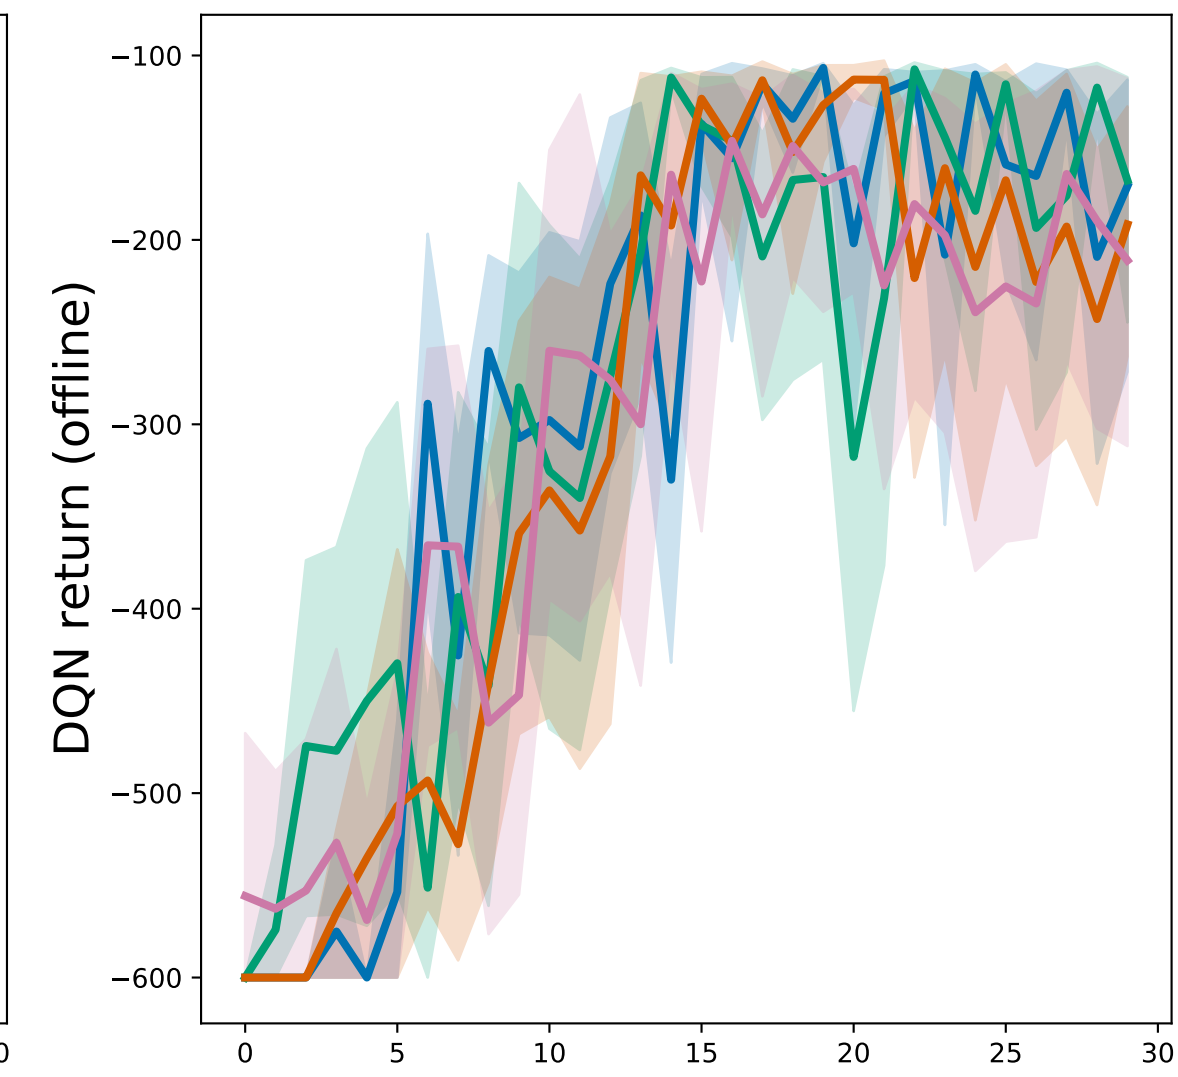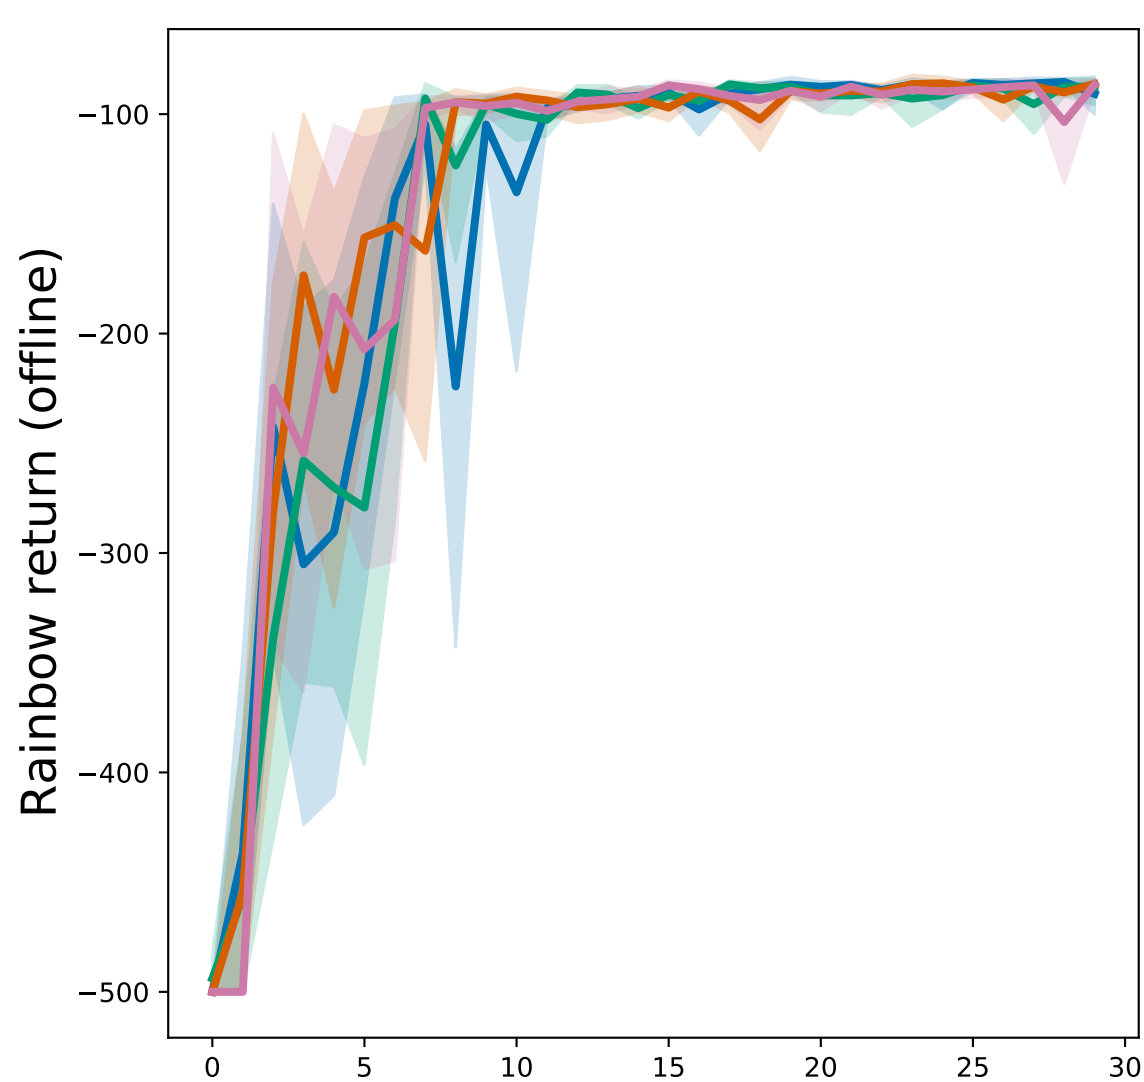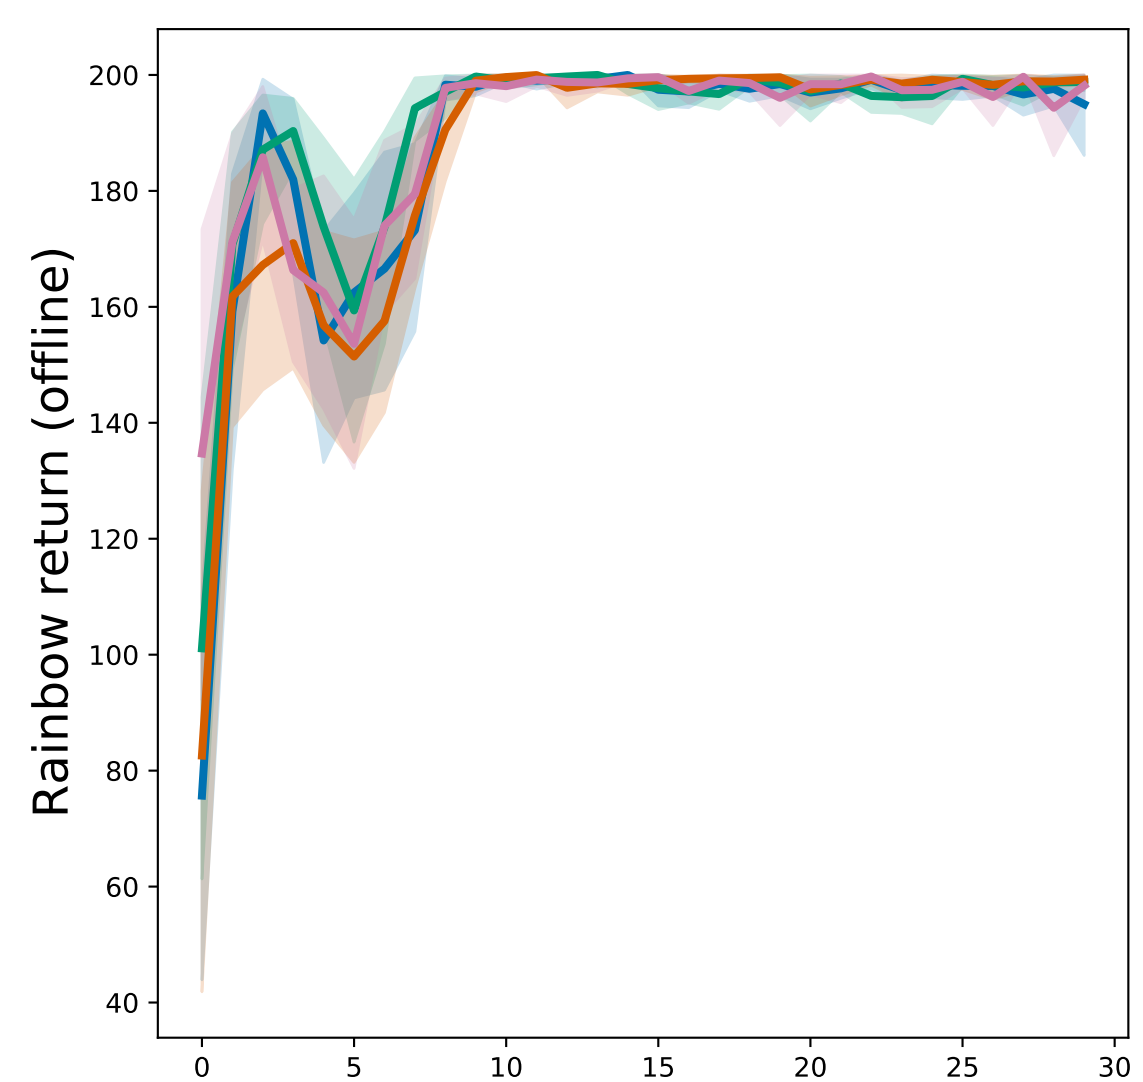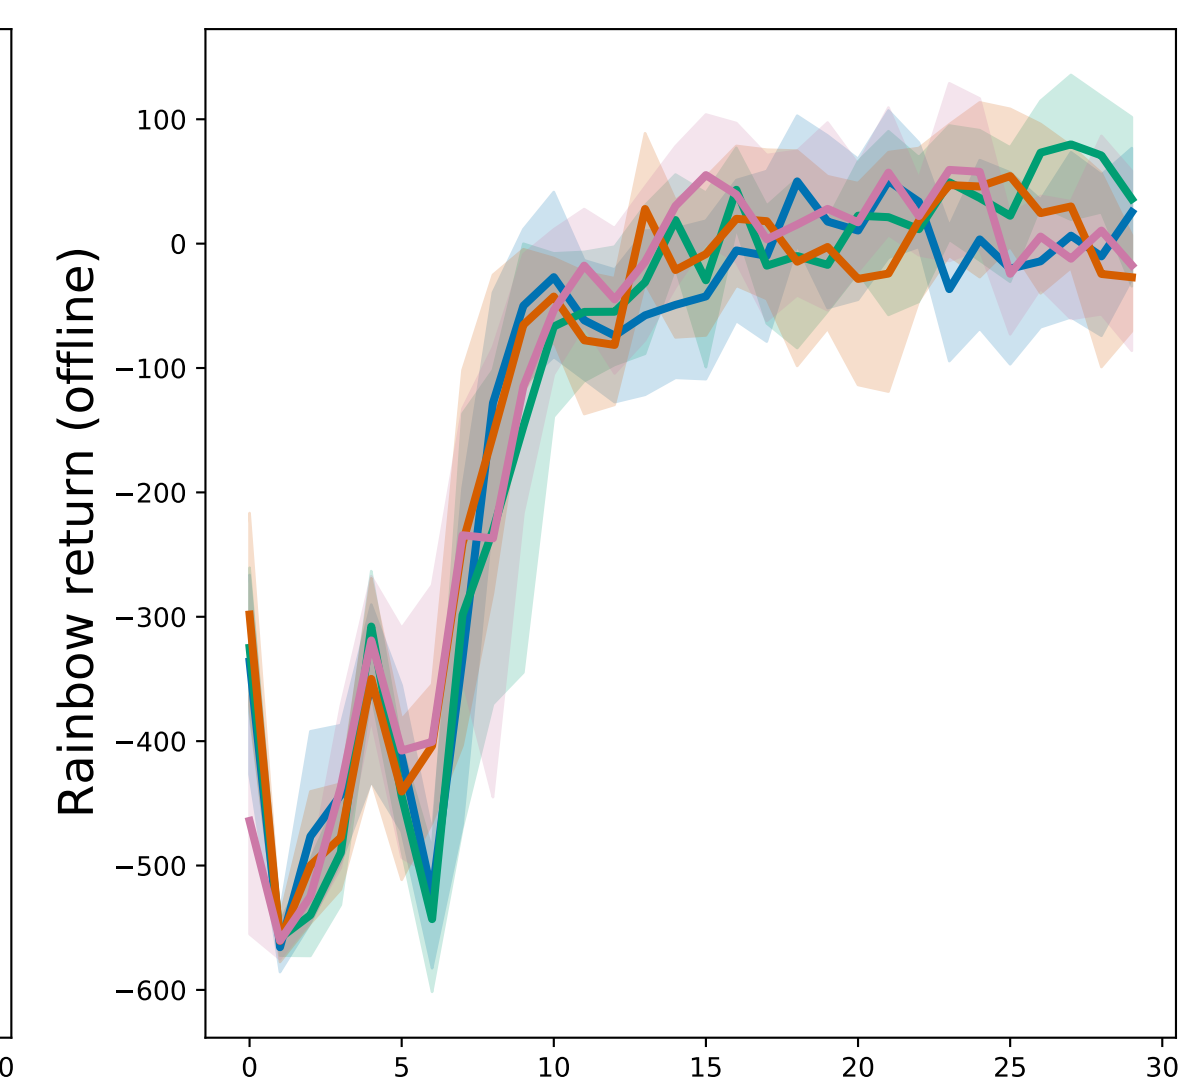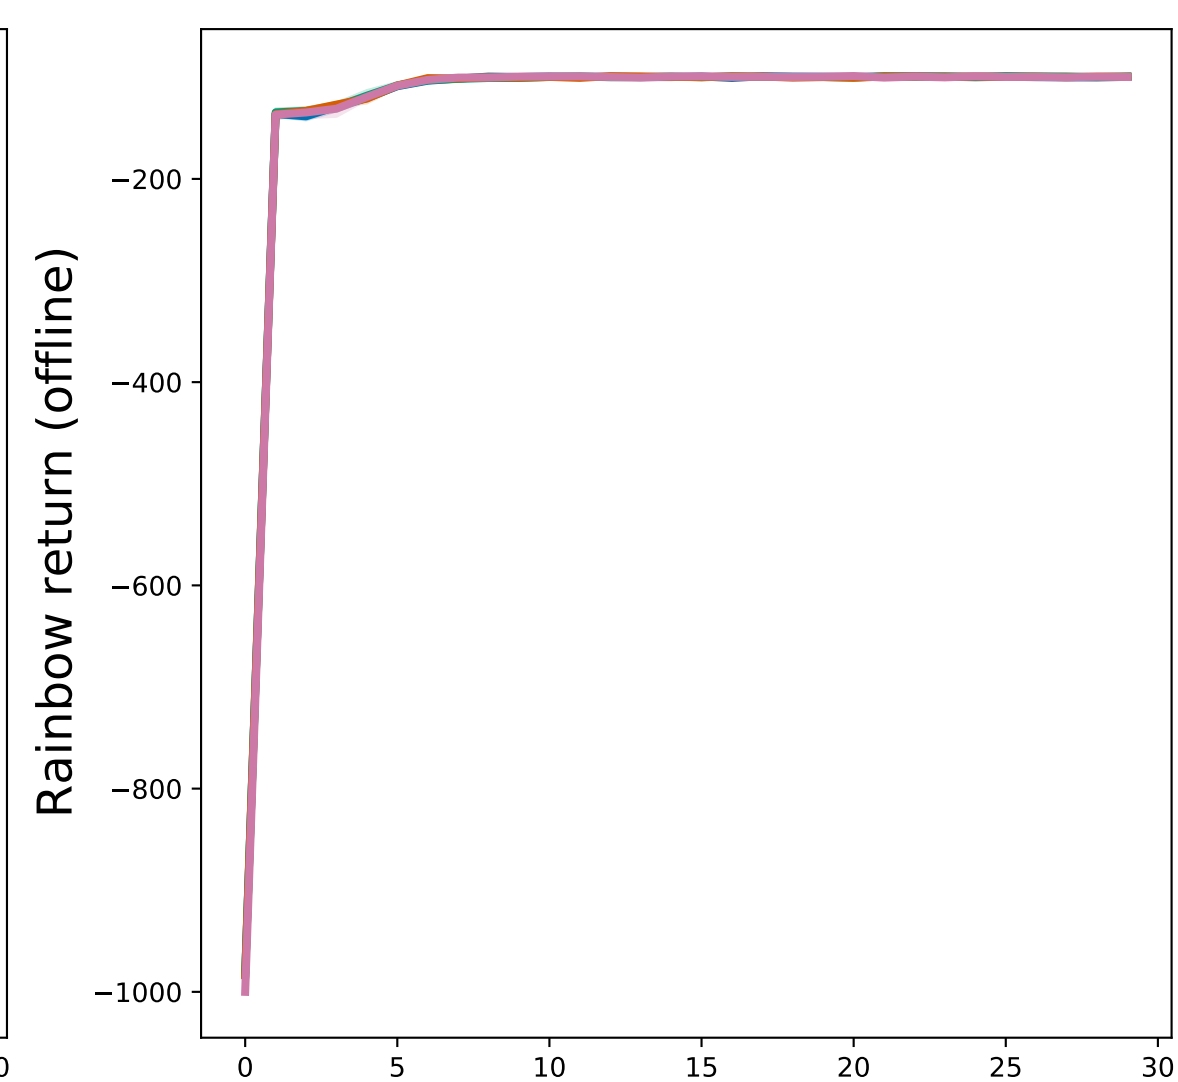

Supplement: supplementary_material [file attachment]

Acrobot

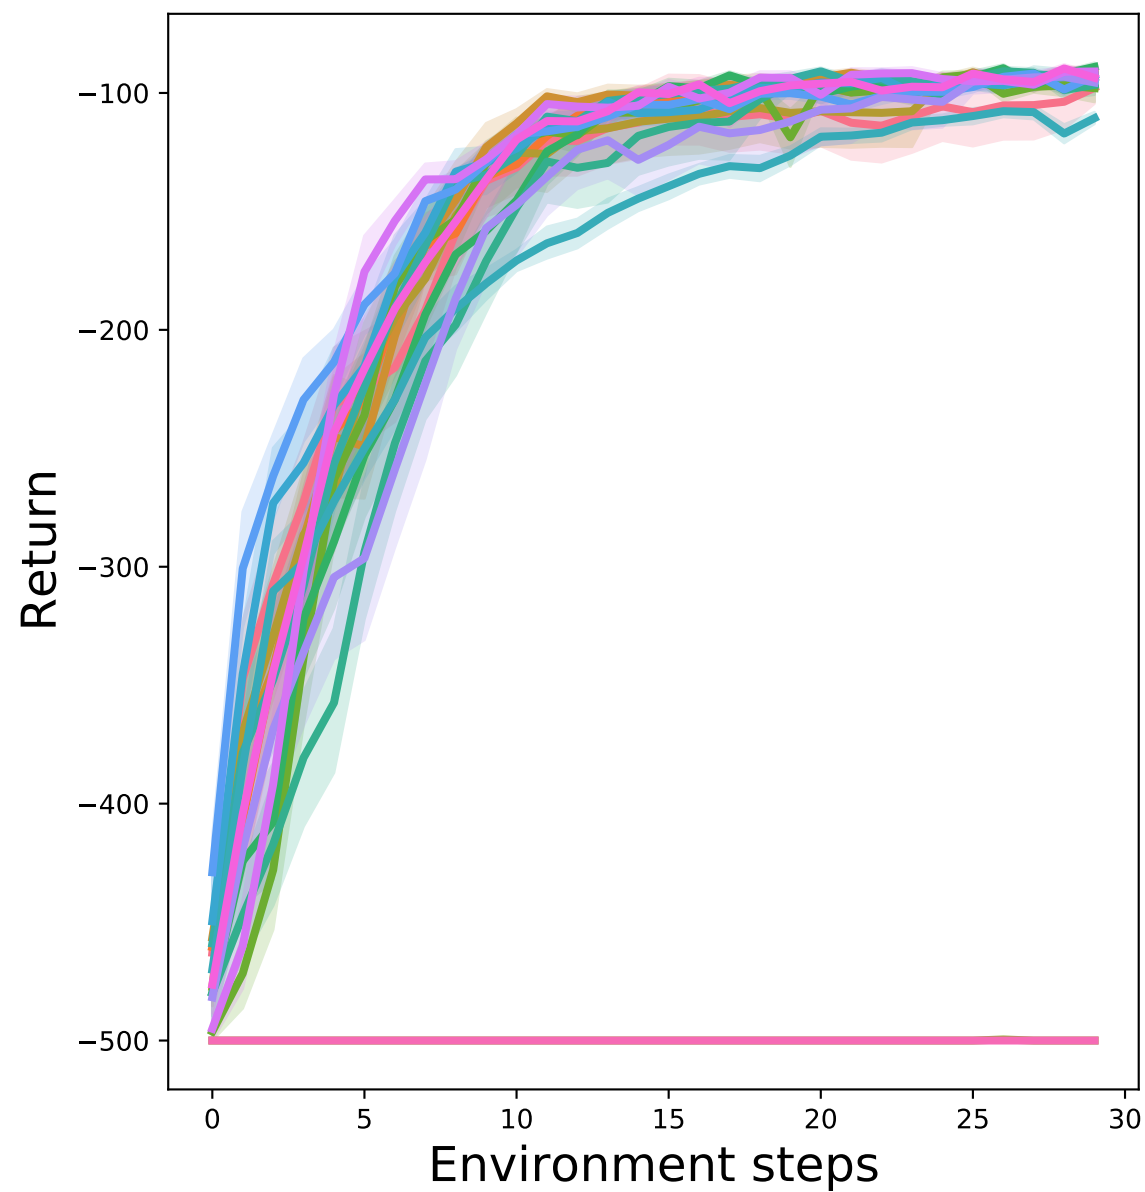

CartPole

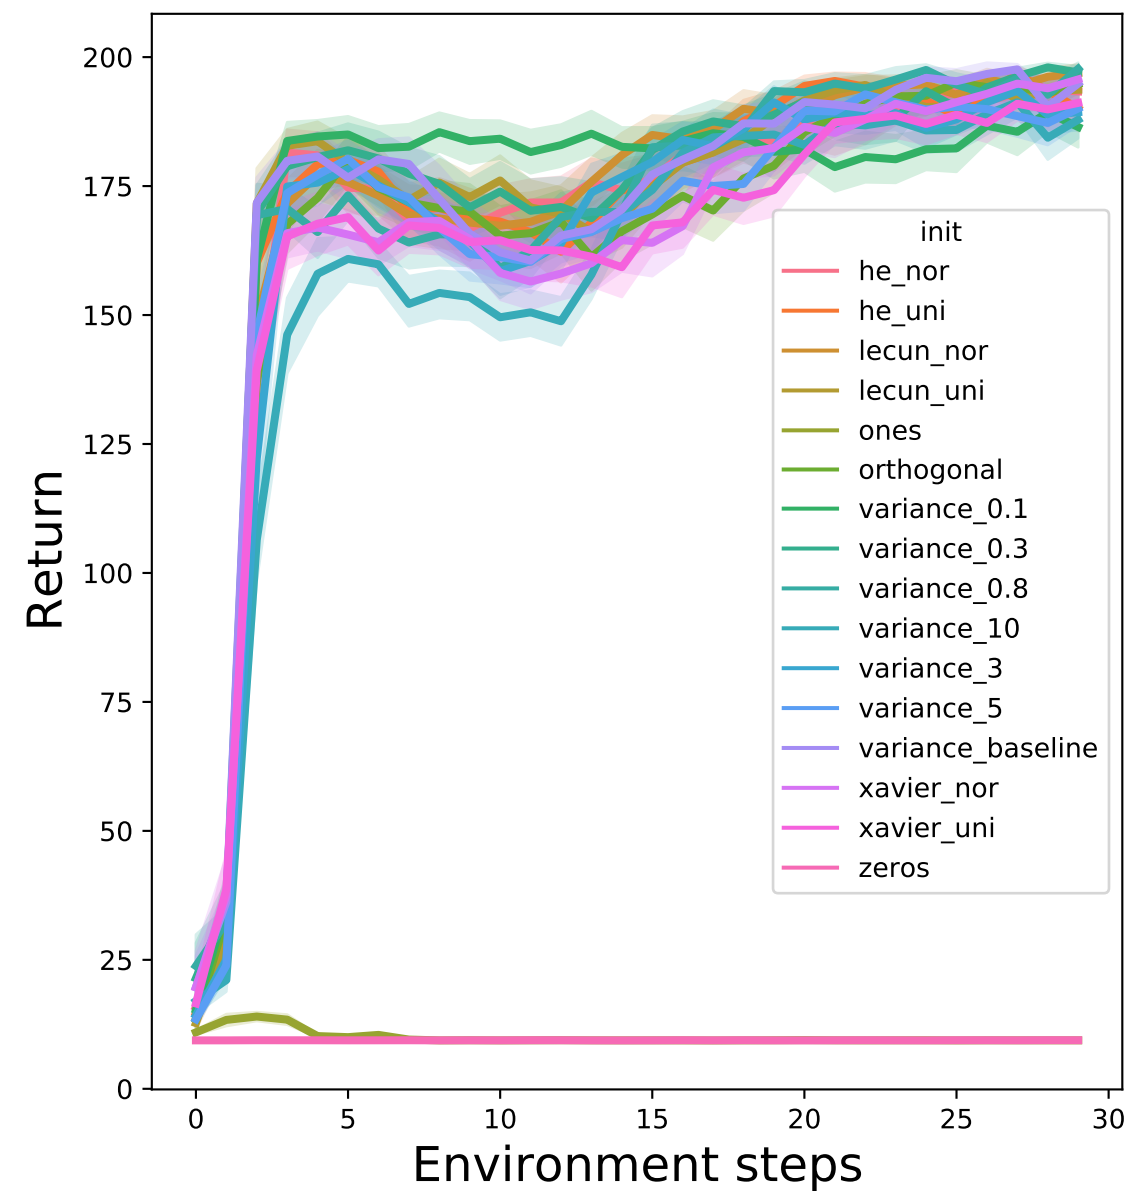

LunarLander

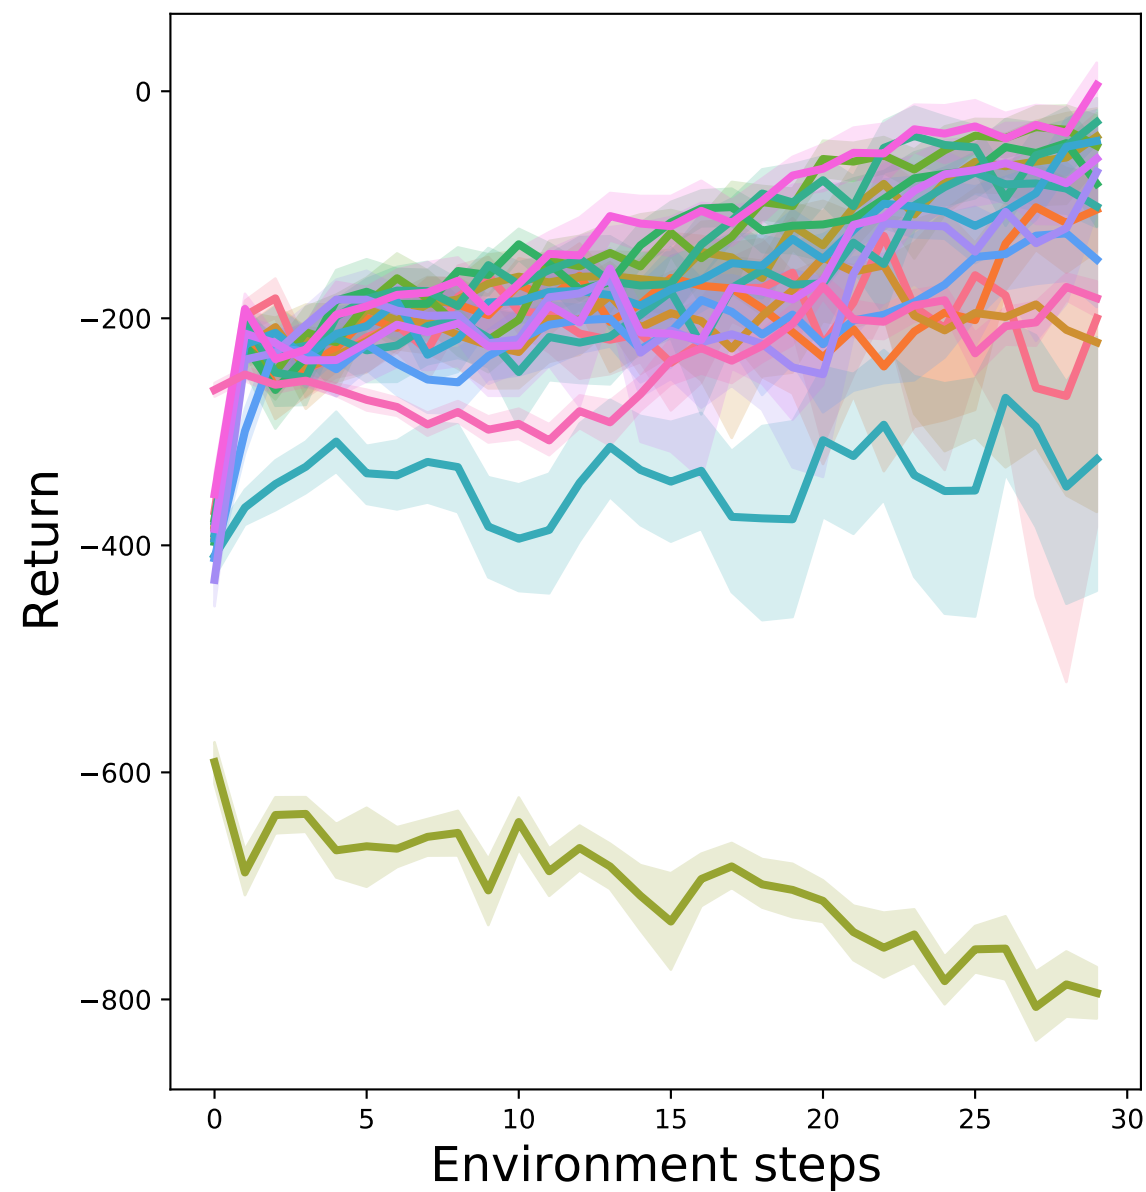

MountainCar

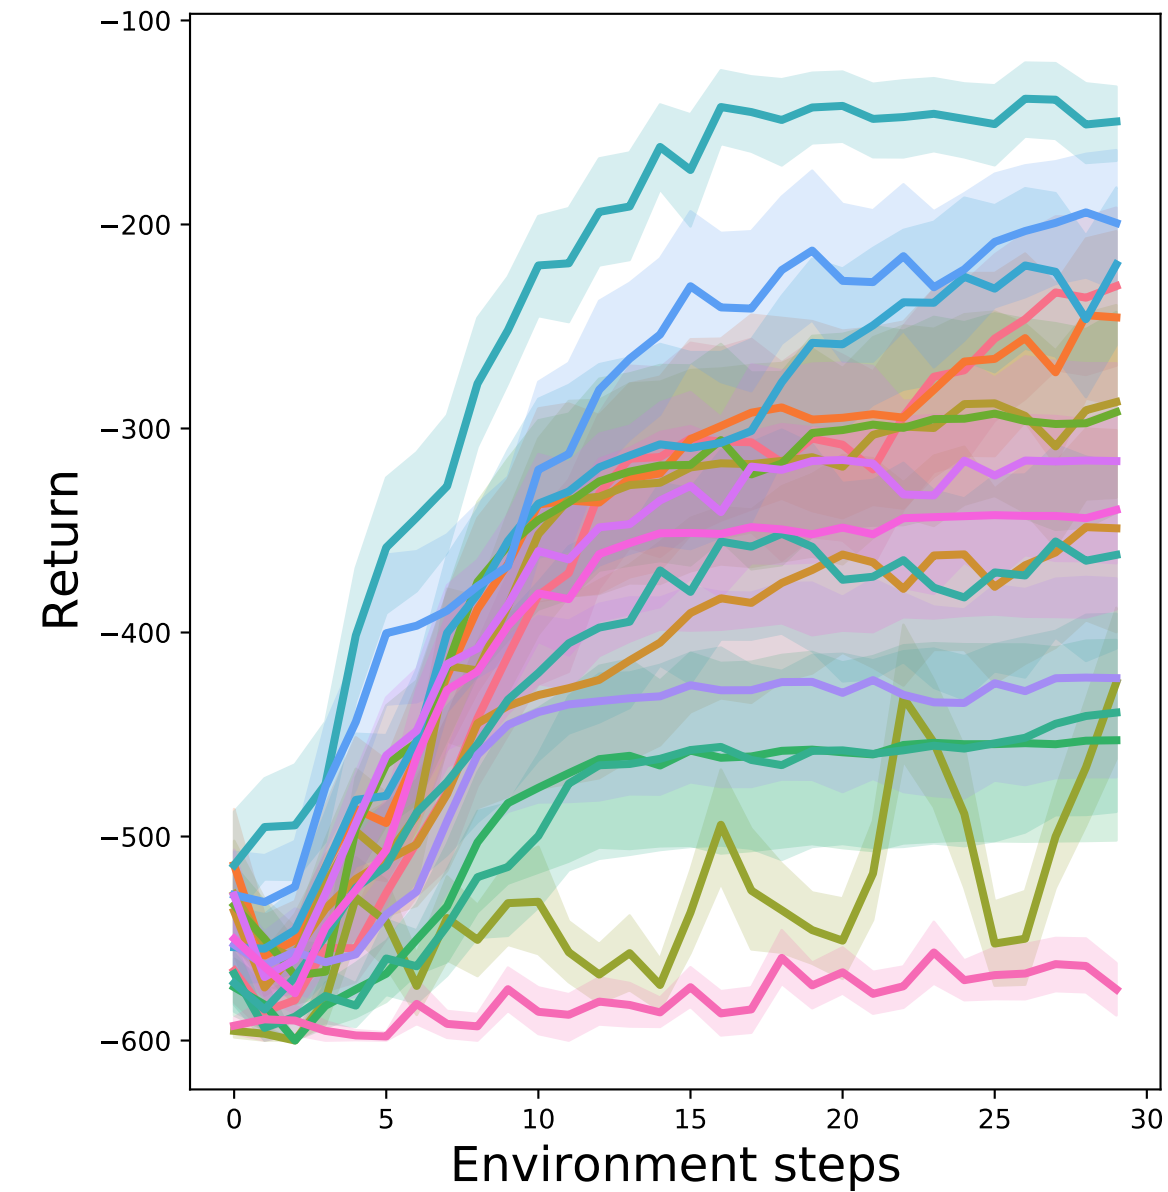

Acrobot

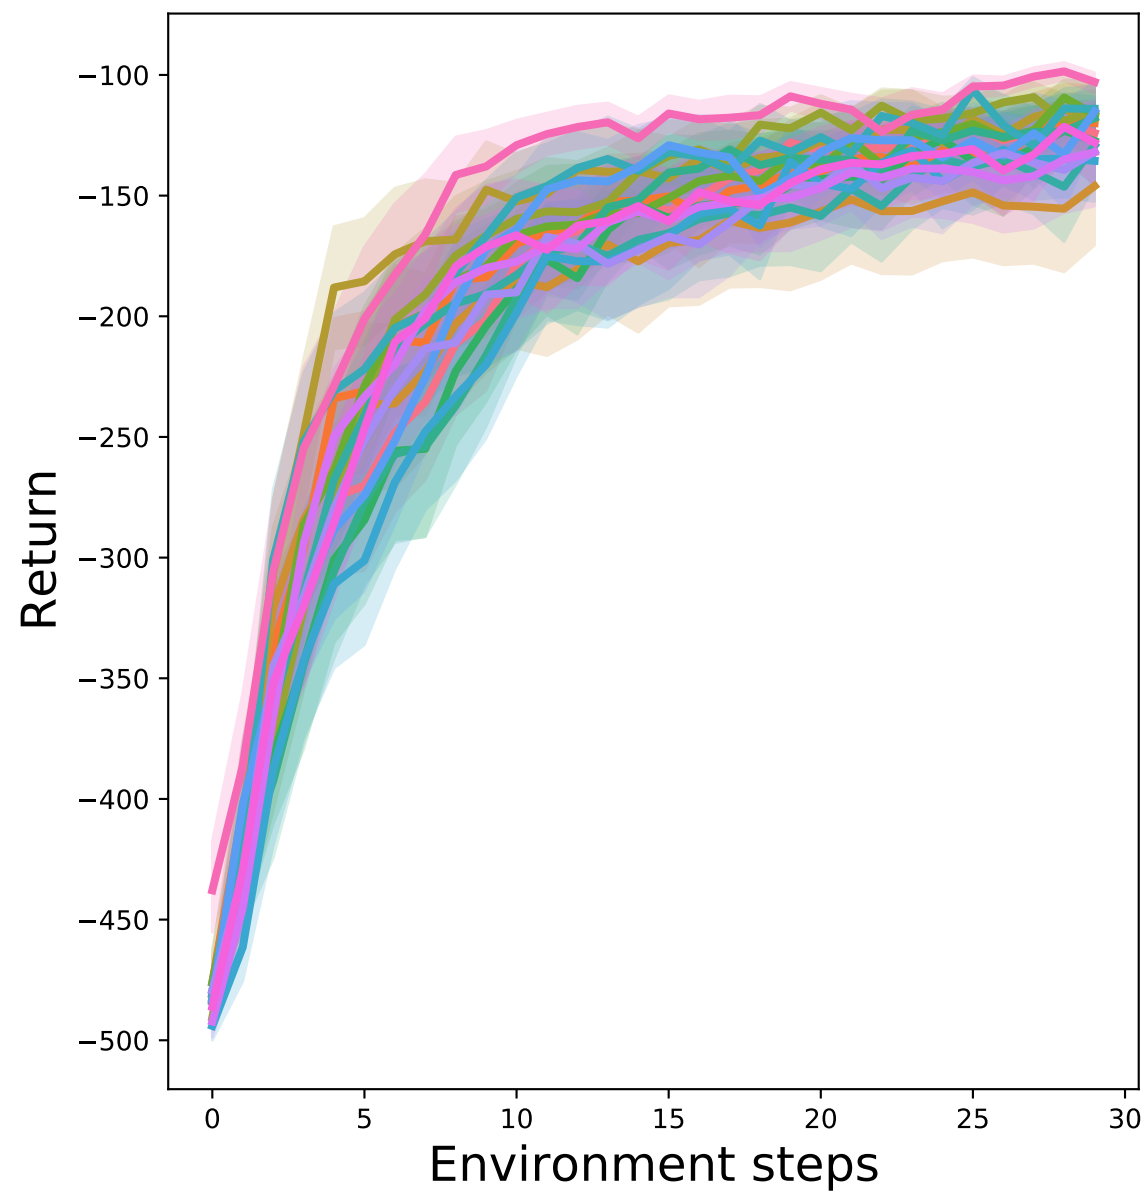

CartPole

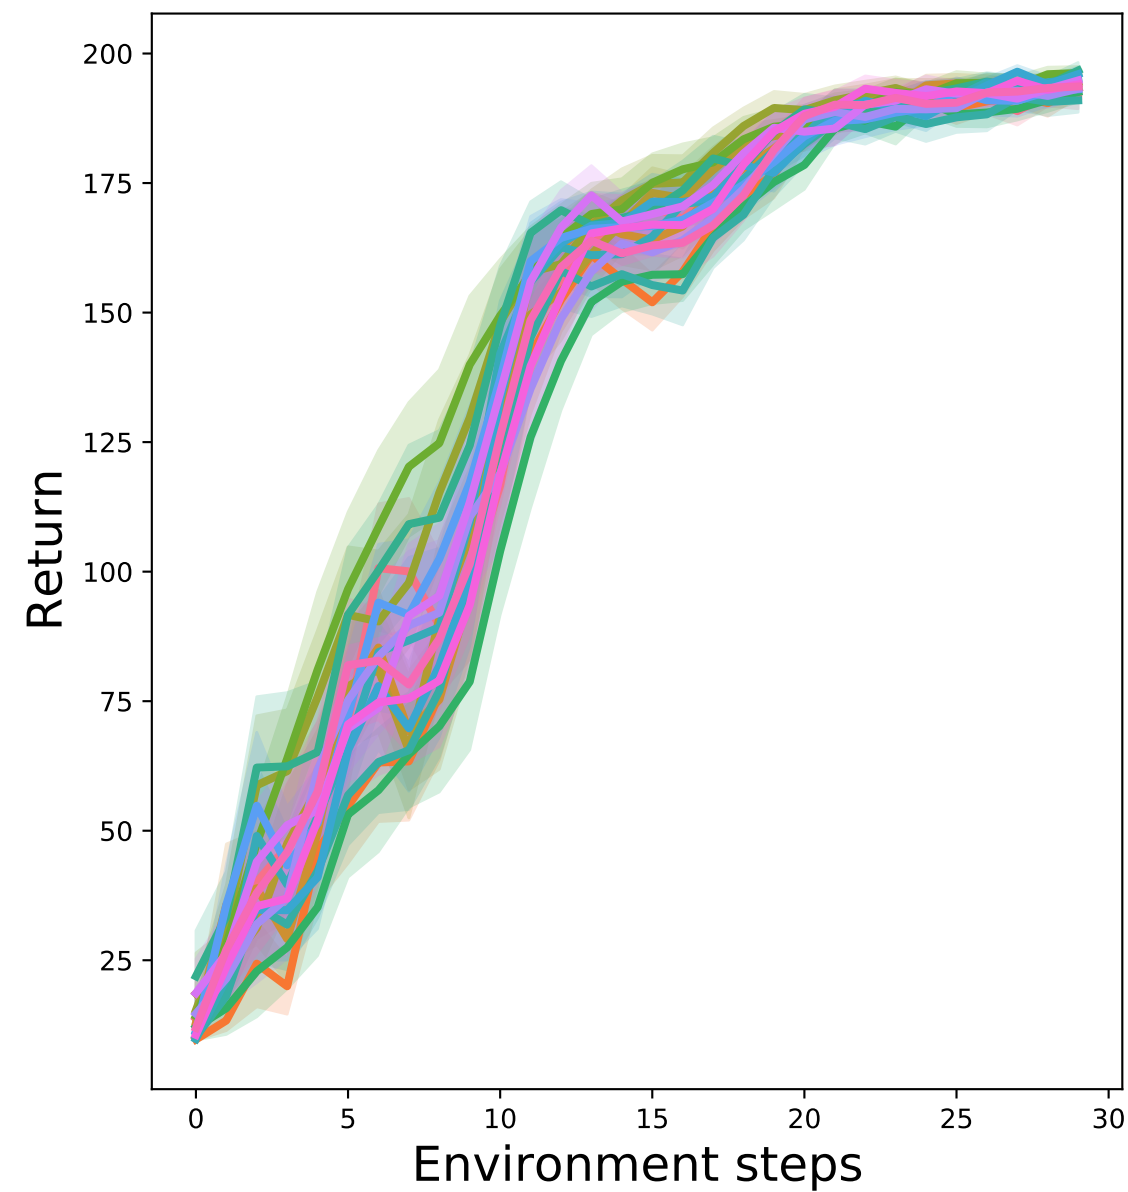

LunarLander

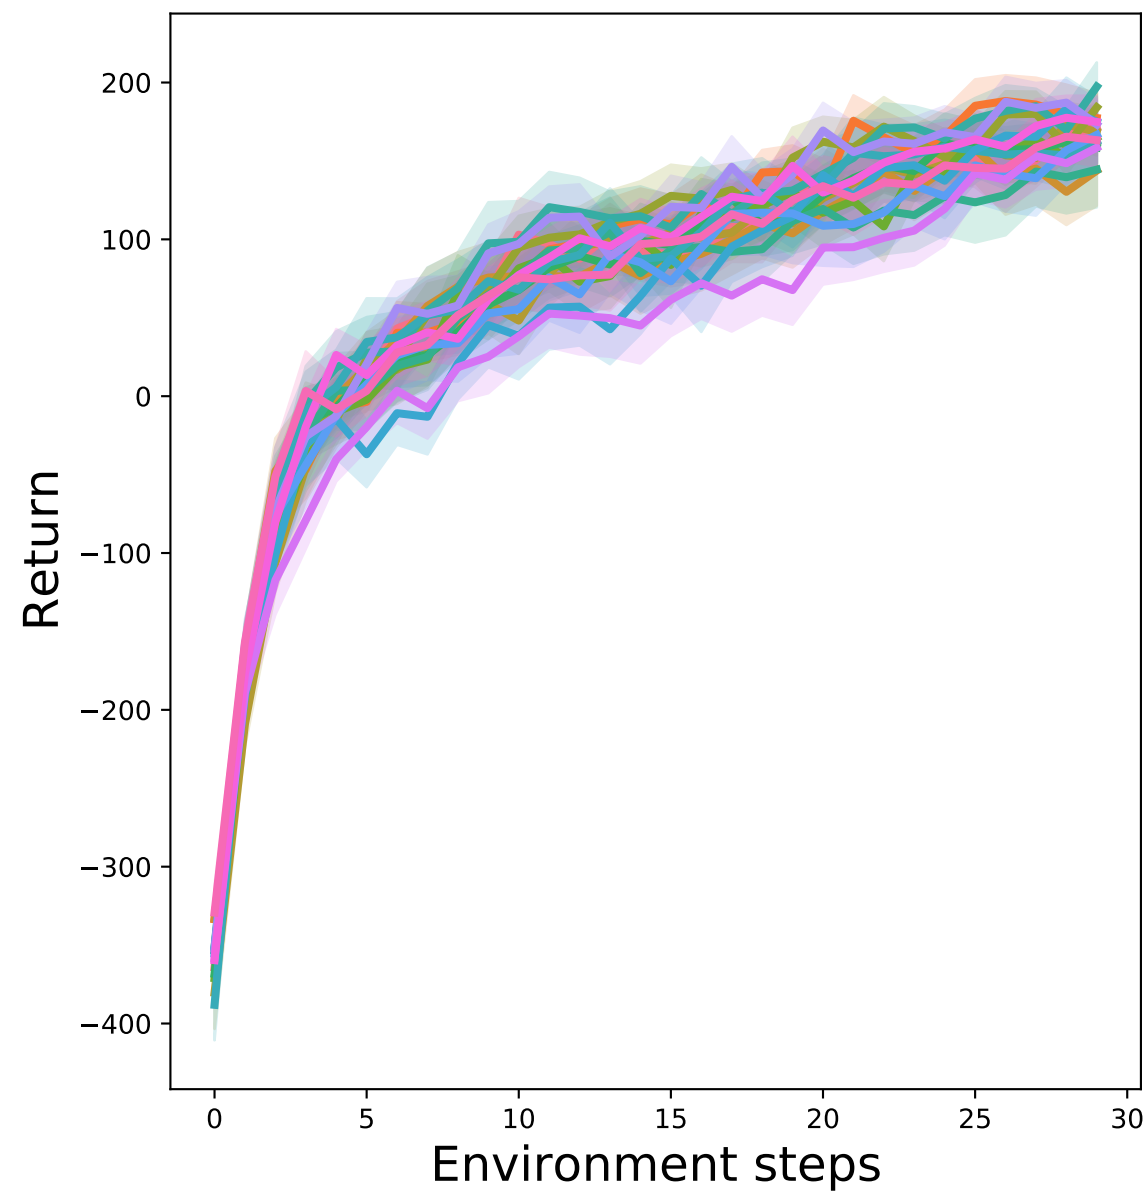

MountainCar

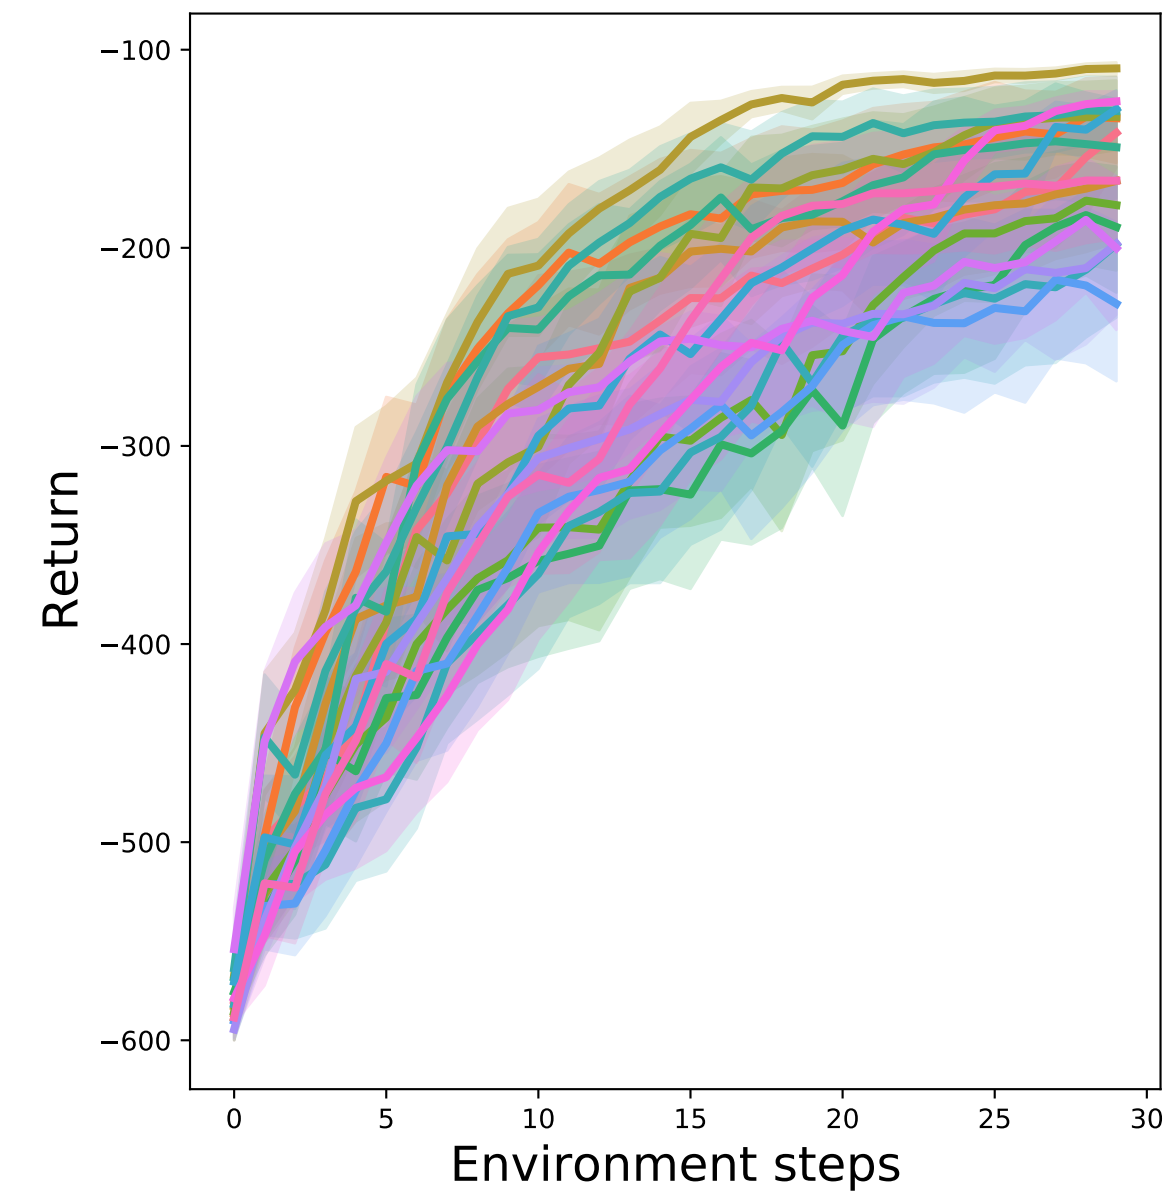

Supplement: supplementary_material [file attachment]

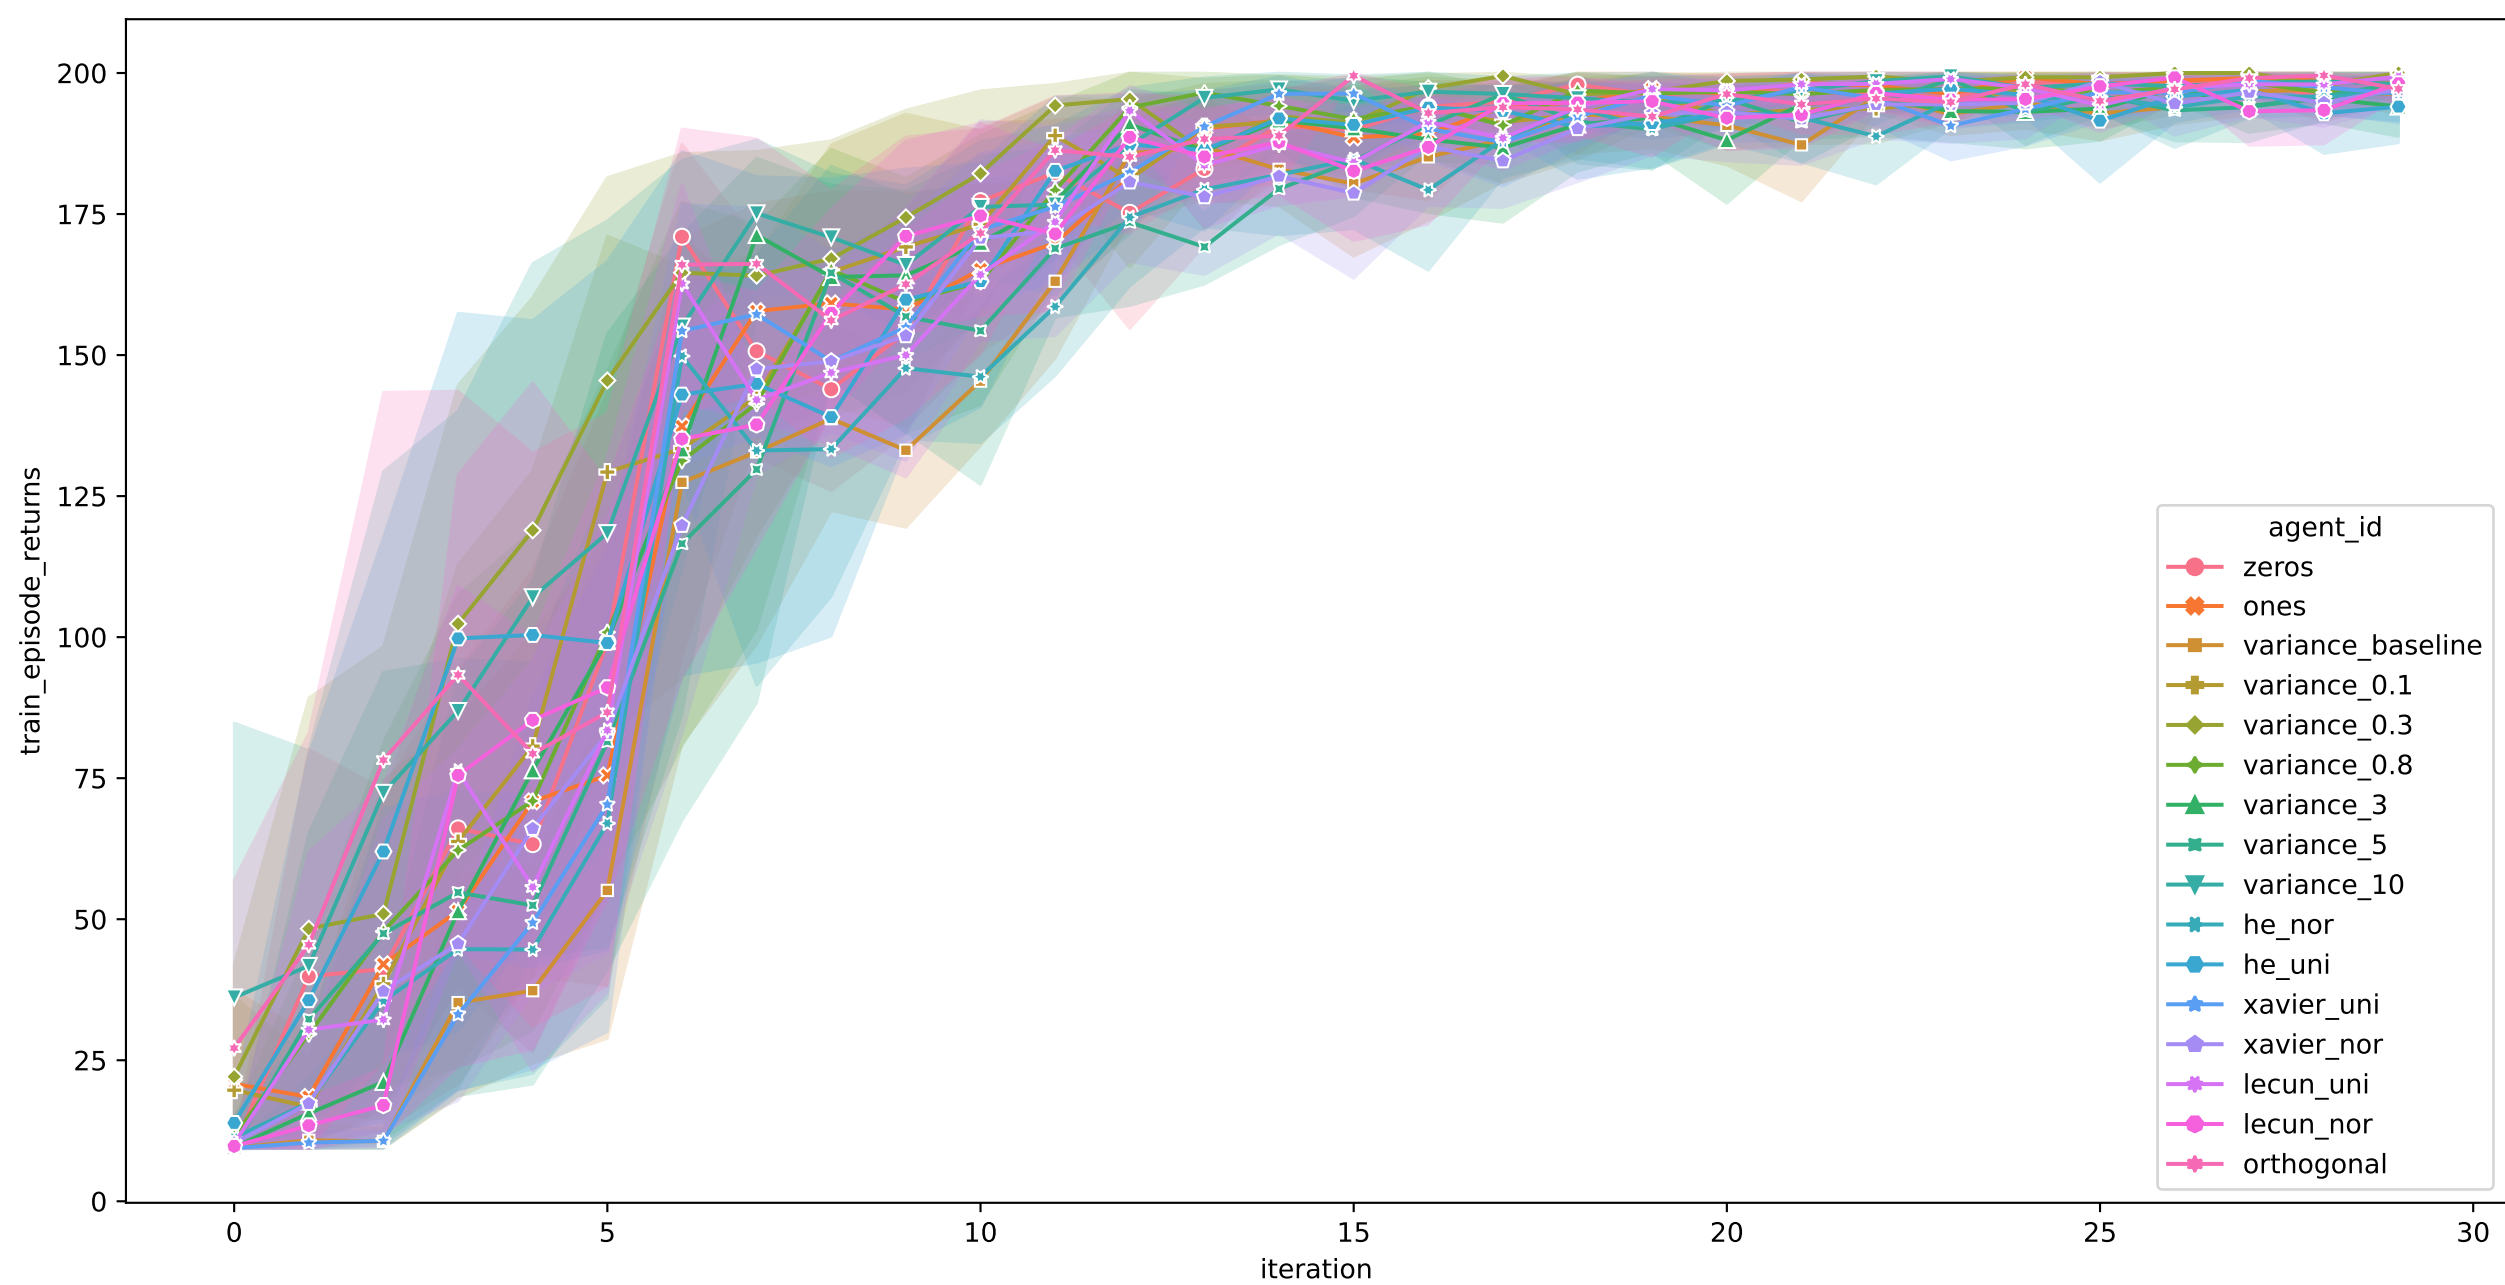

Supplement: supplementary_material [file attachment]

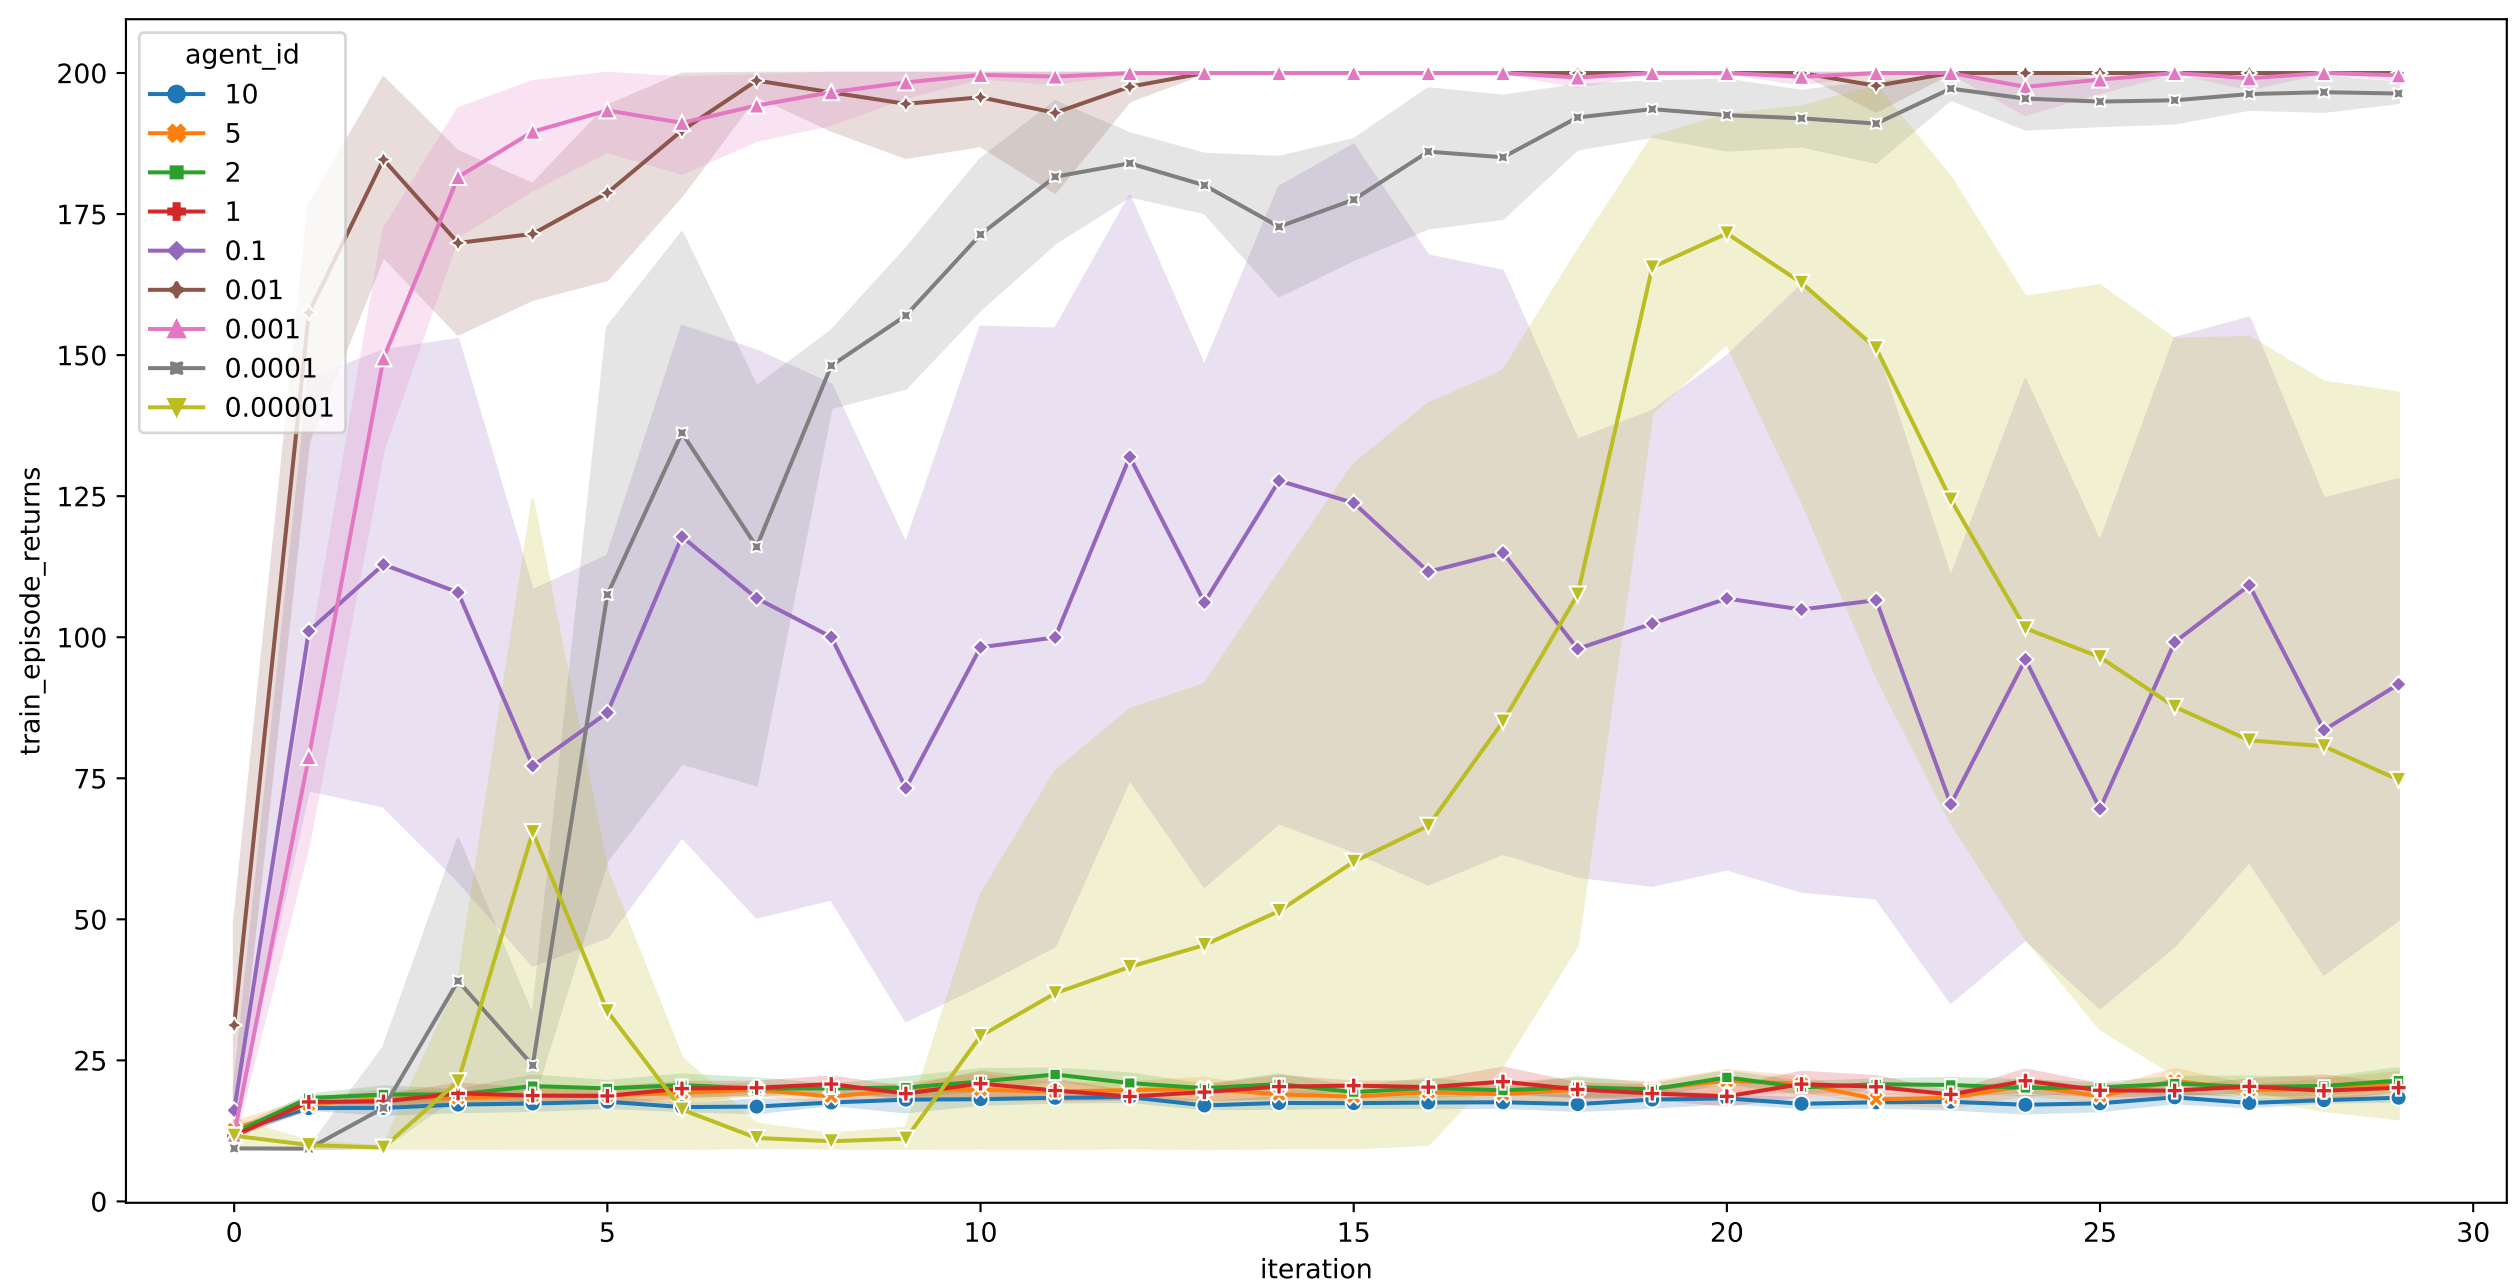

Supplement: supplementary_material [file attachment]

Acrobot

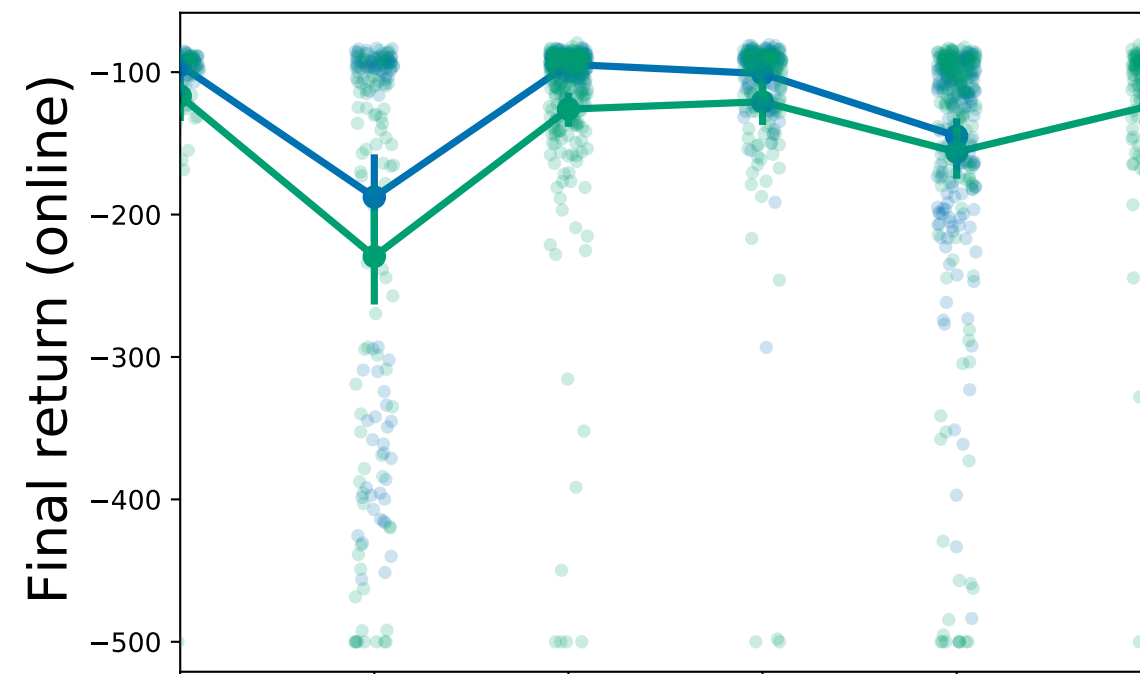

CartPole

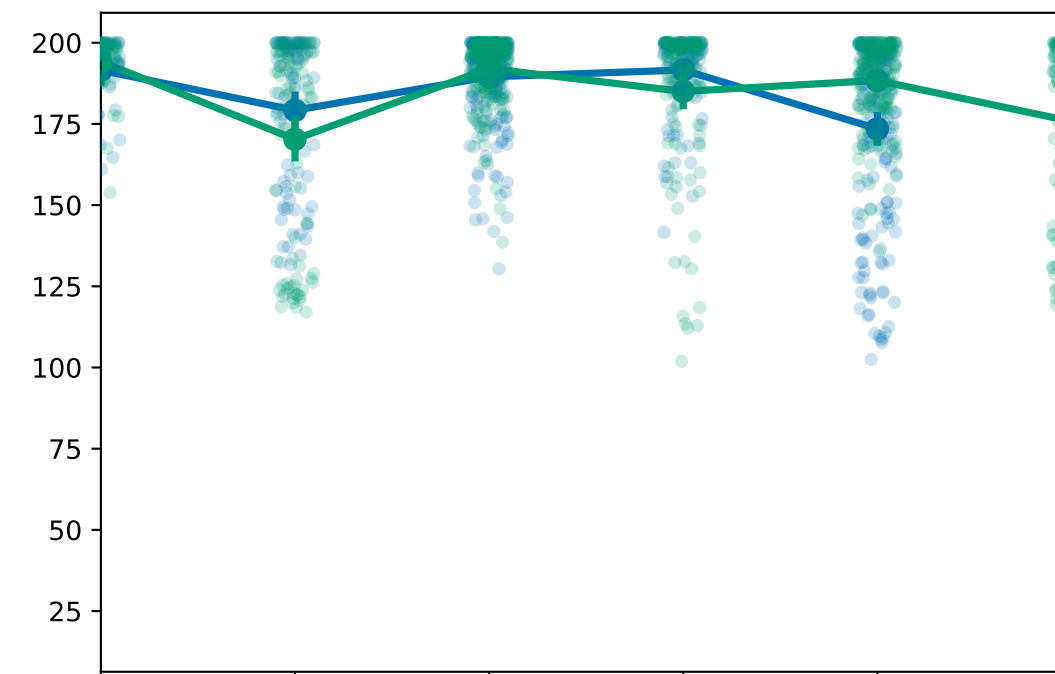

LunarLander

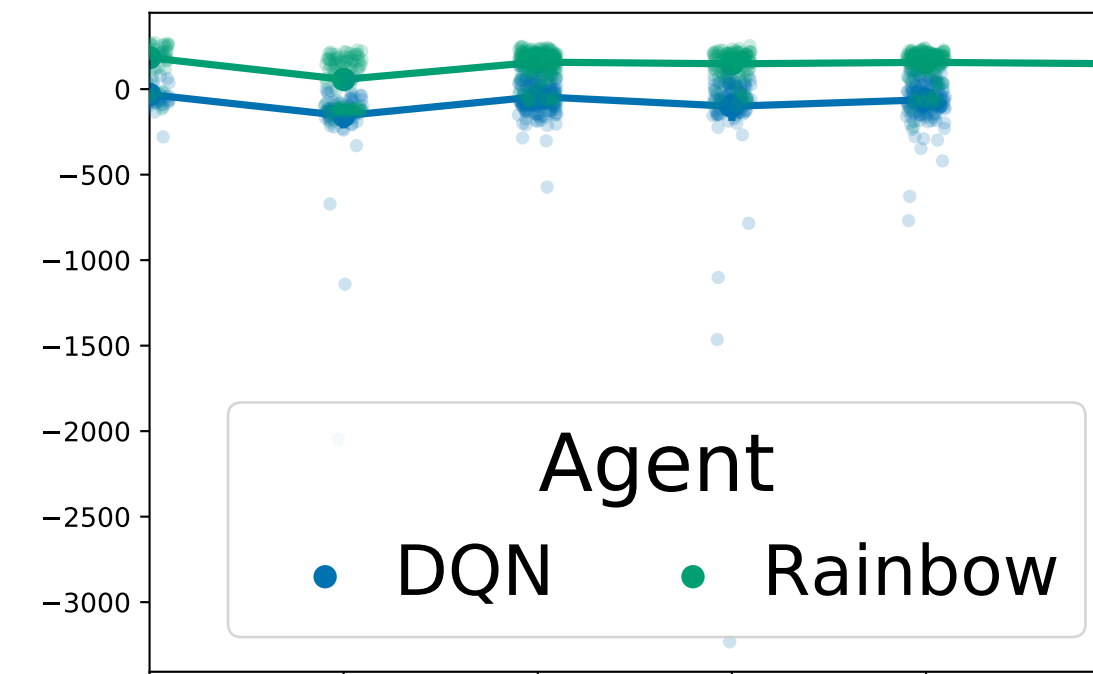

MountainCar

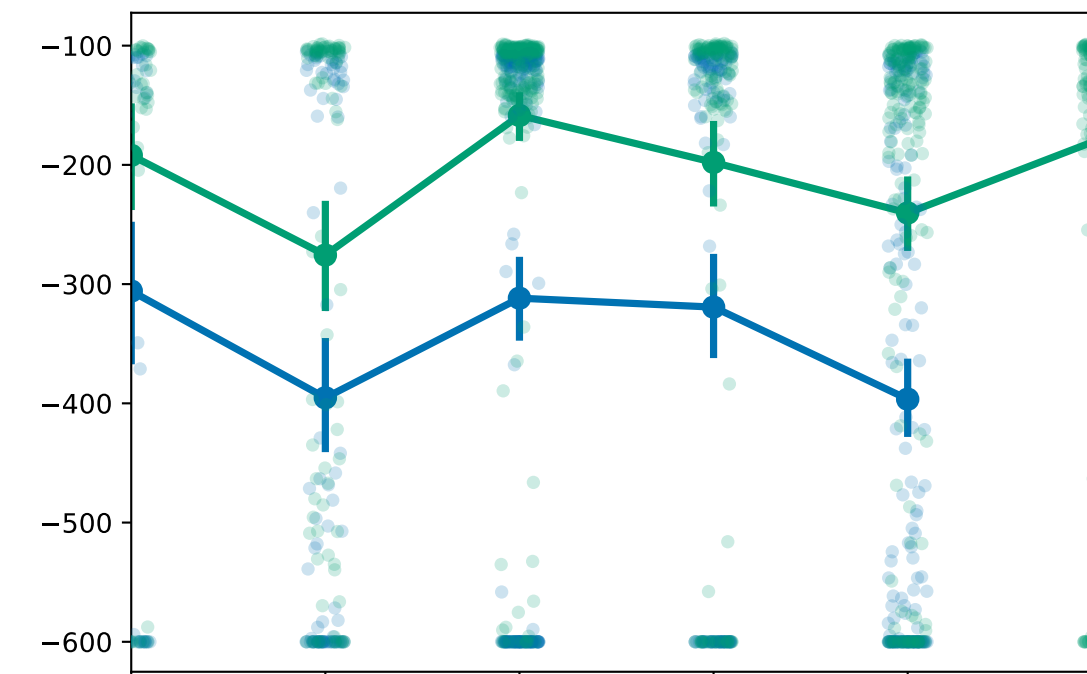

Final return (offline)

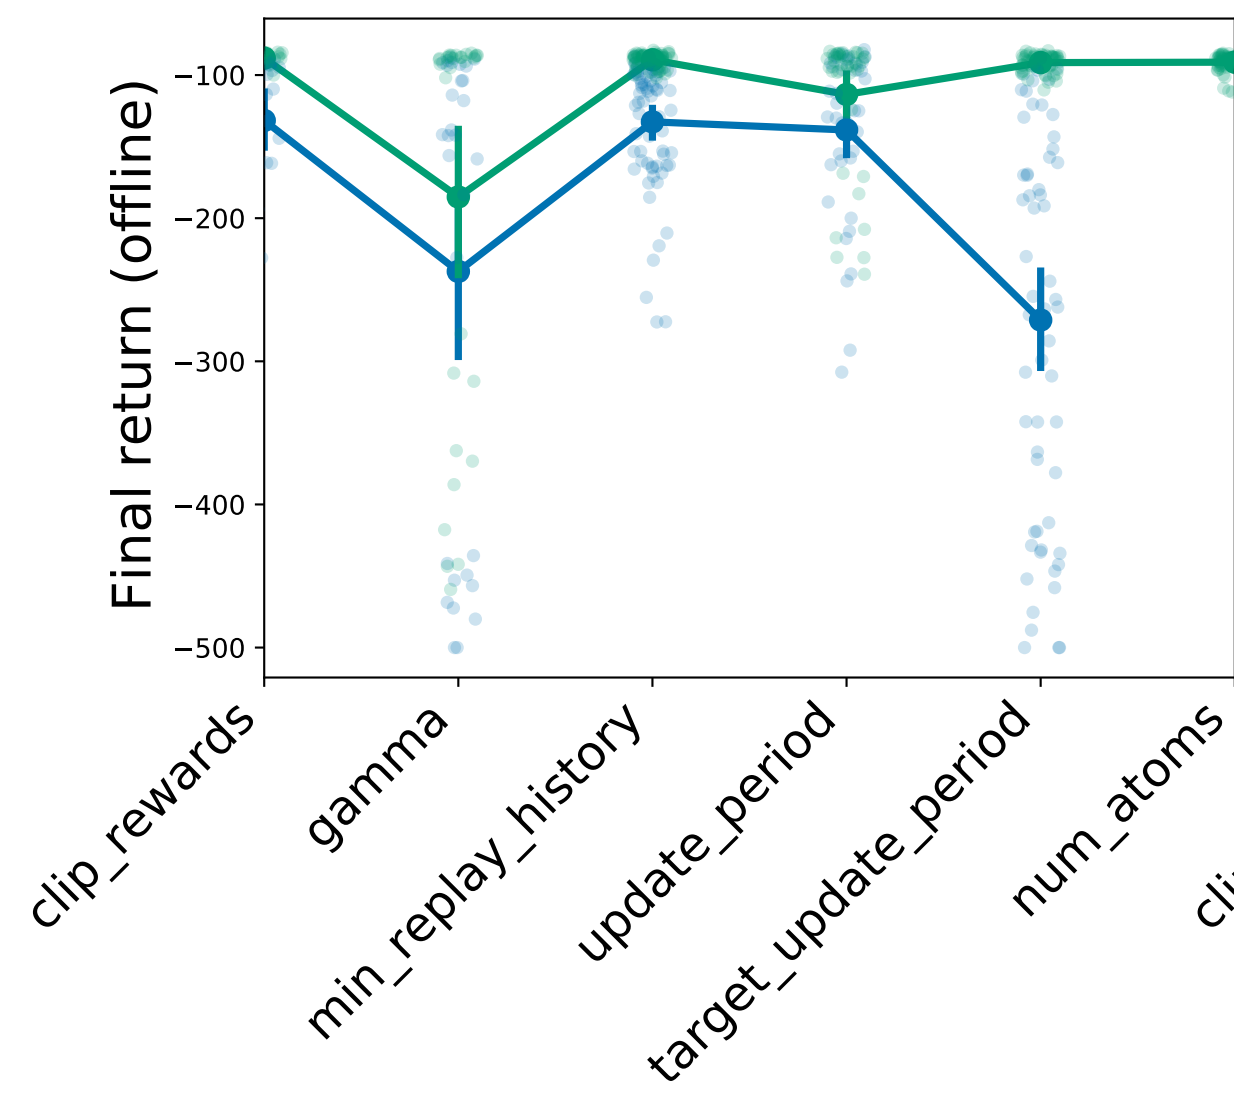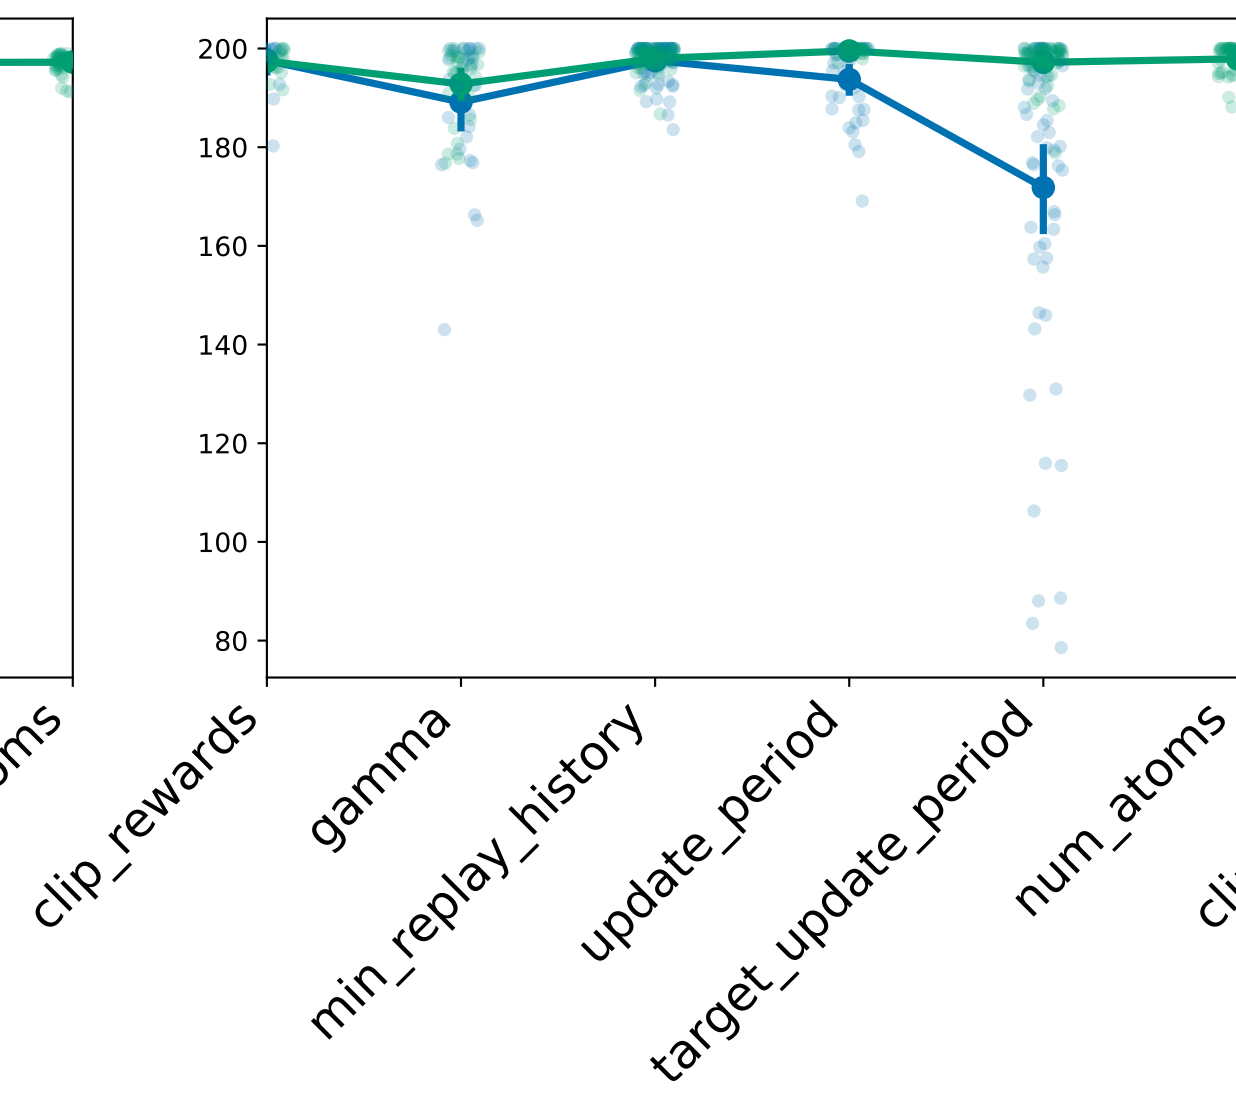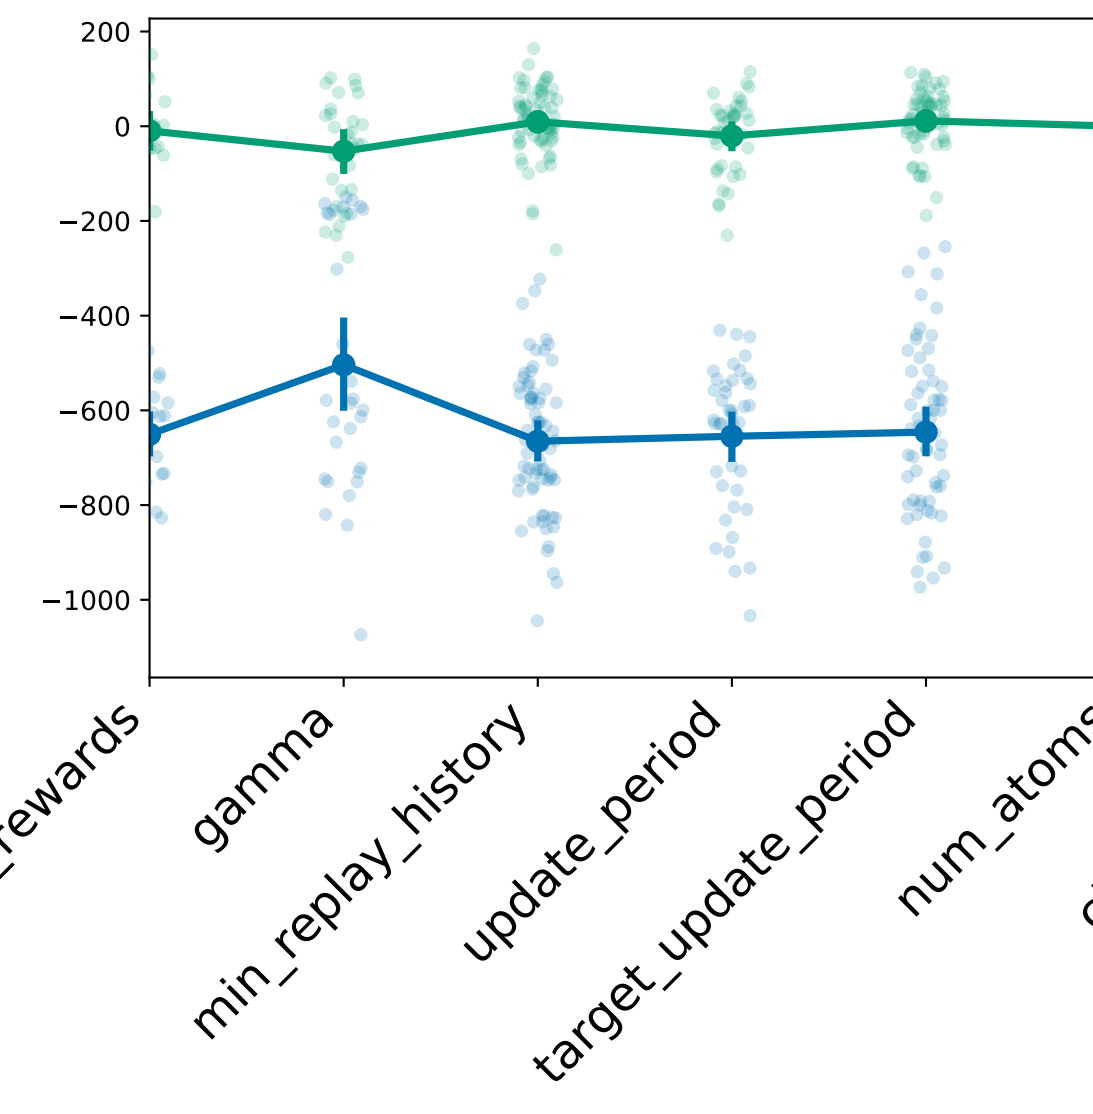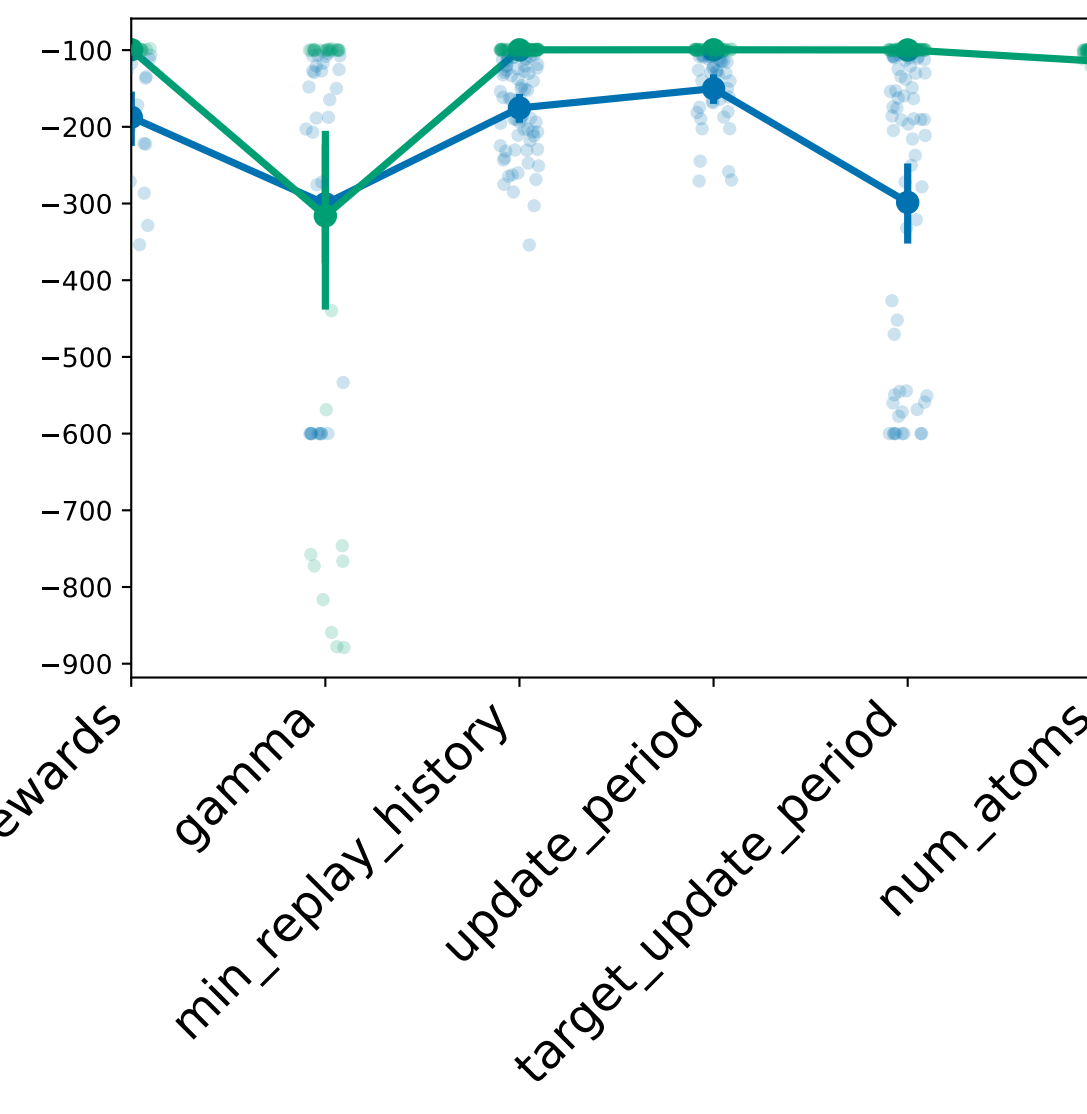

Agent

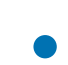

DQN

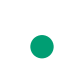

Rainbow

Supplement: supplementary_material [file attachment]

Acrobot

CartPole

LunarLander

MountainCar

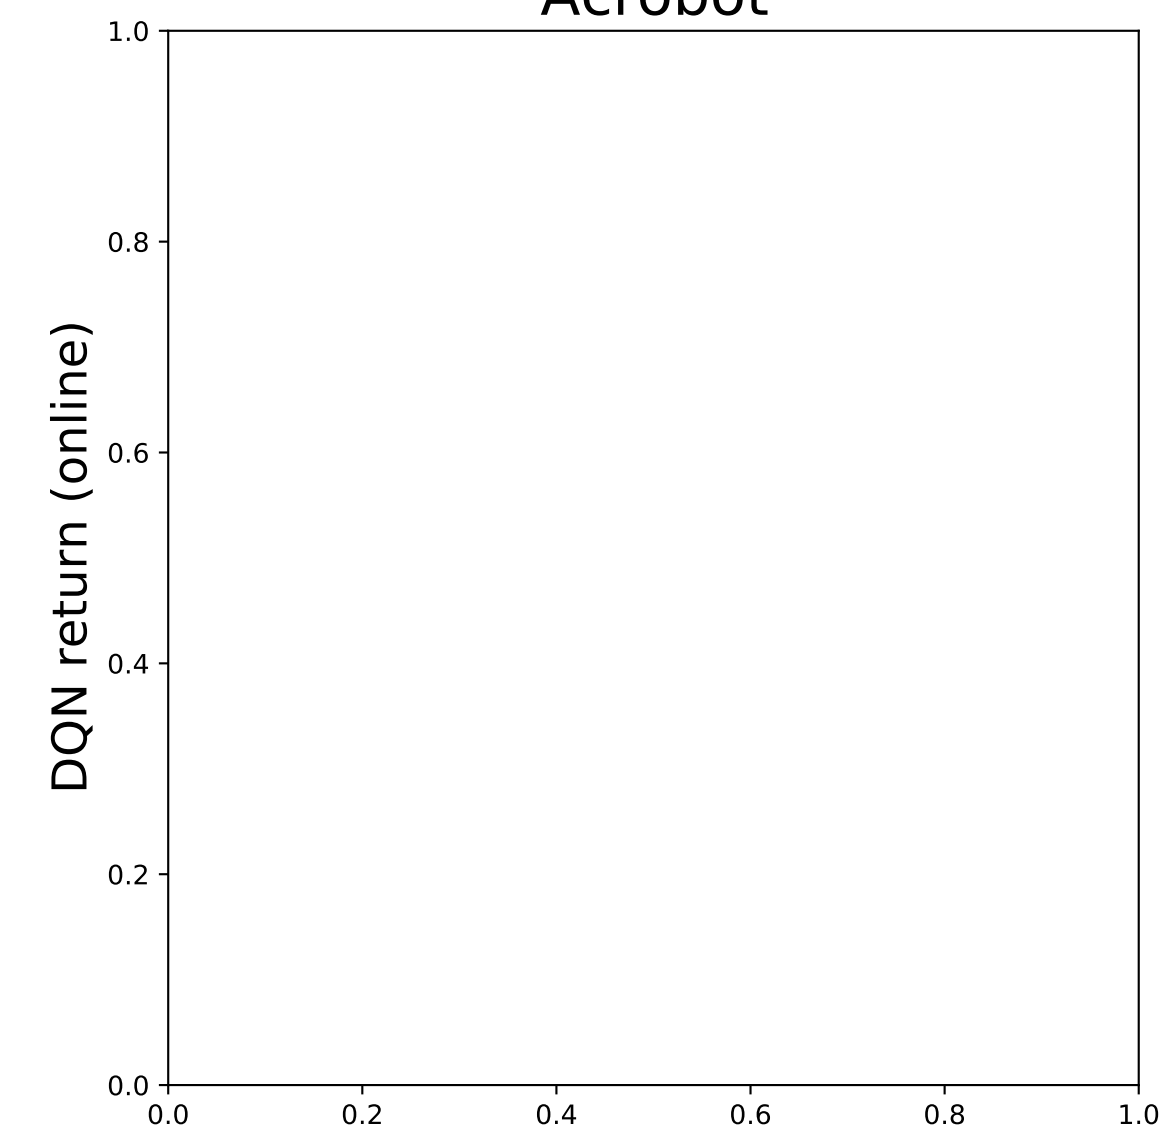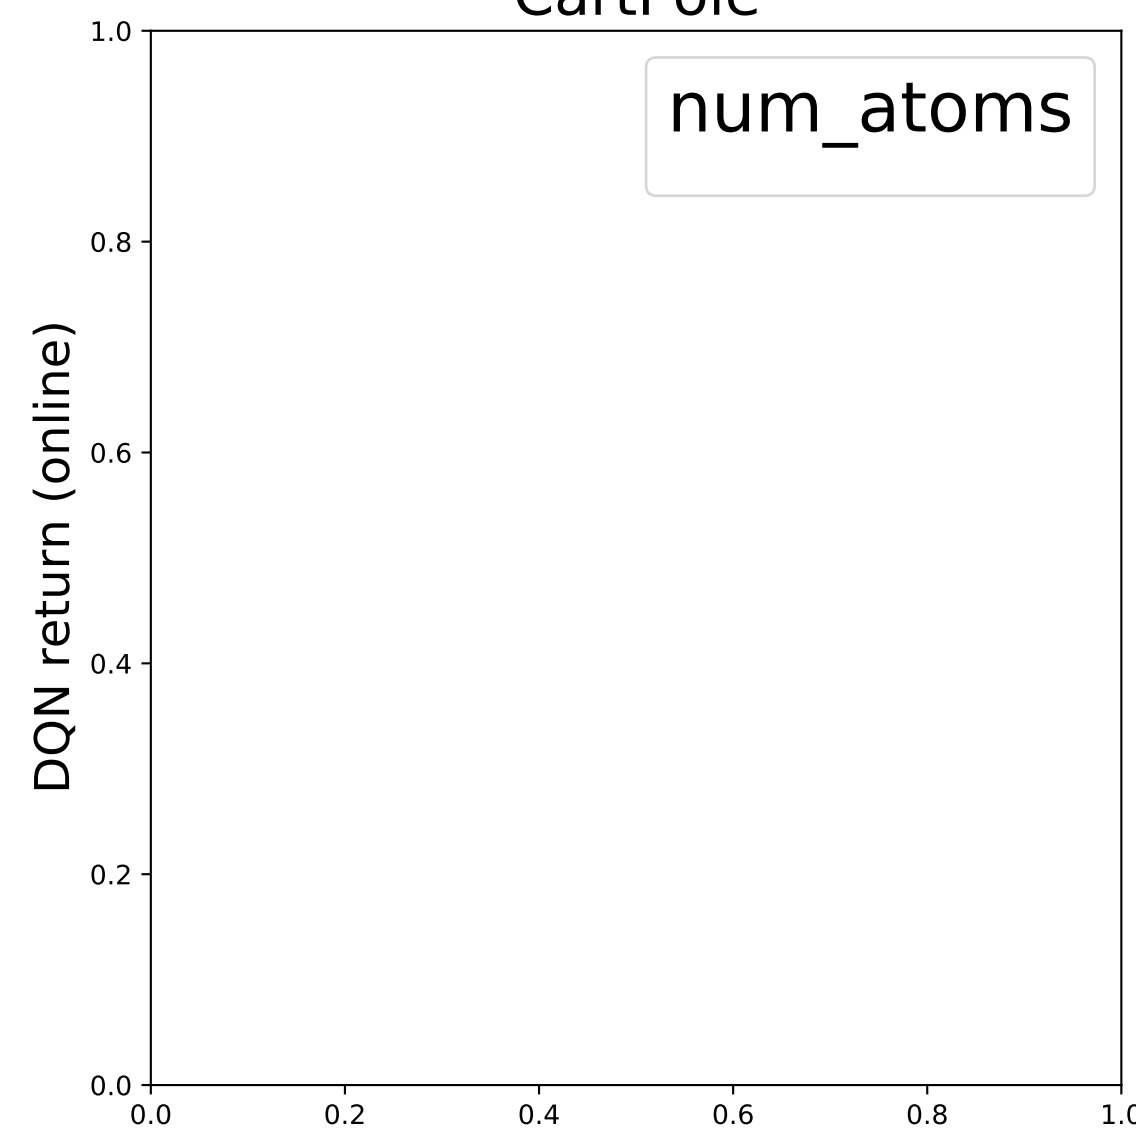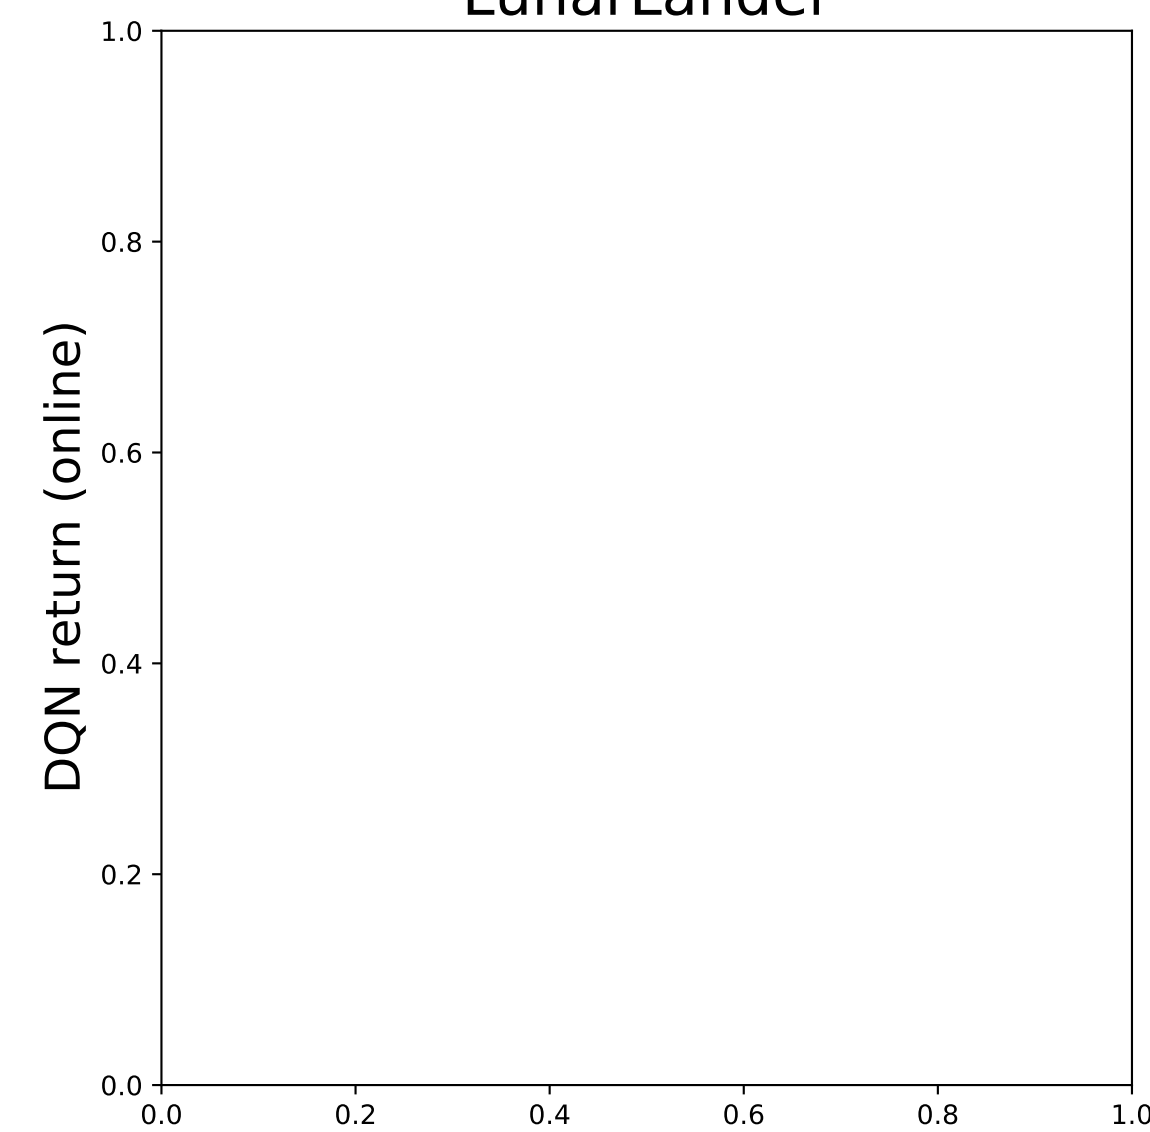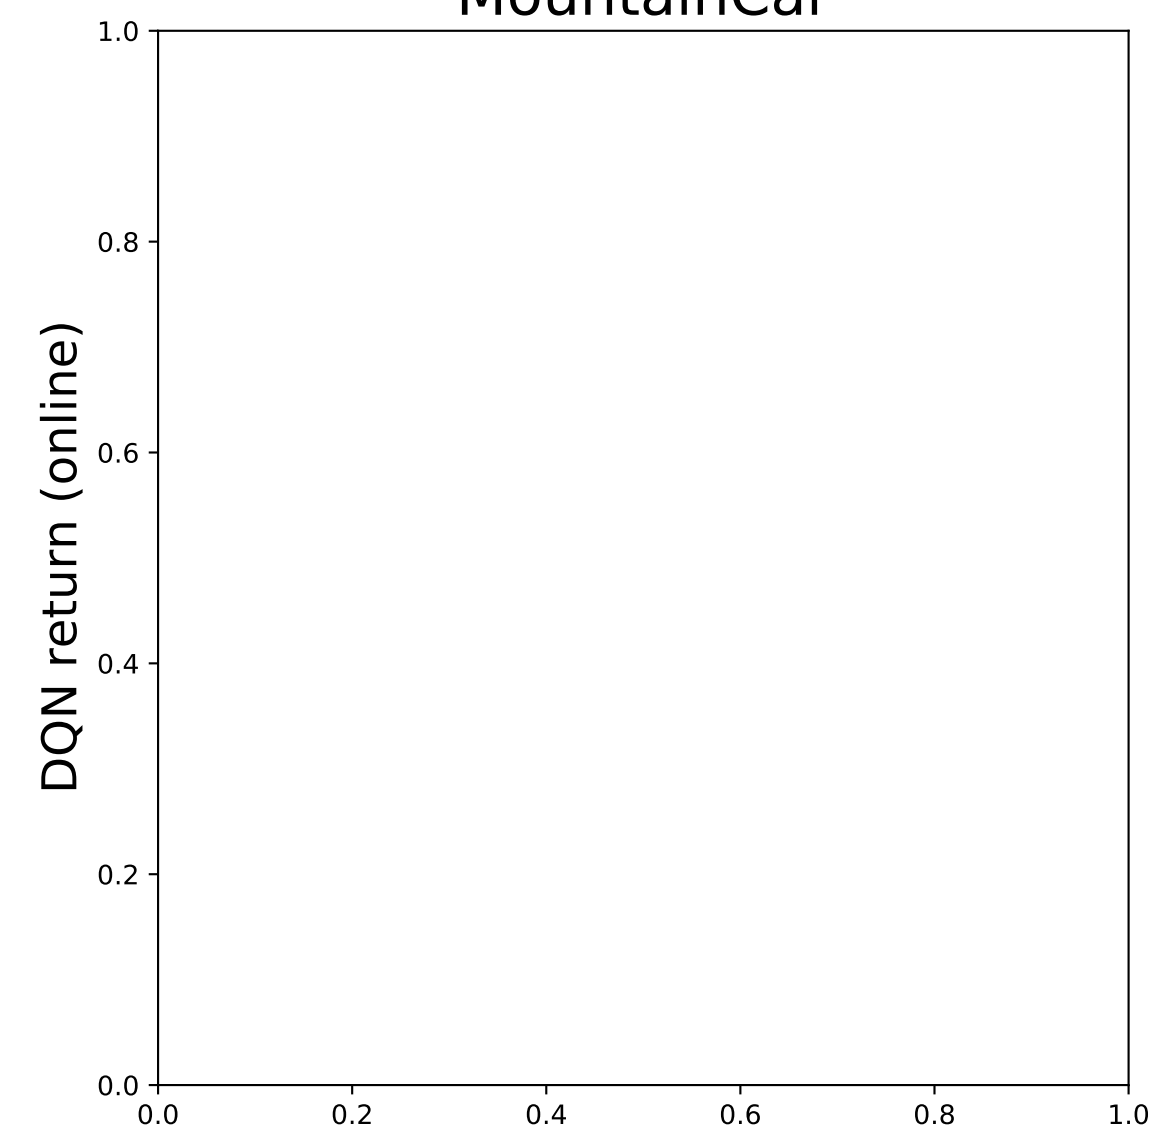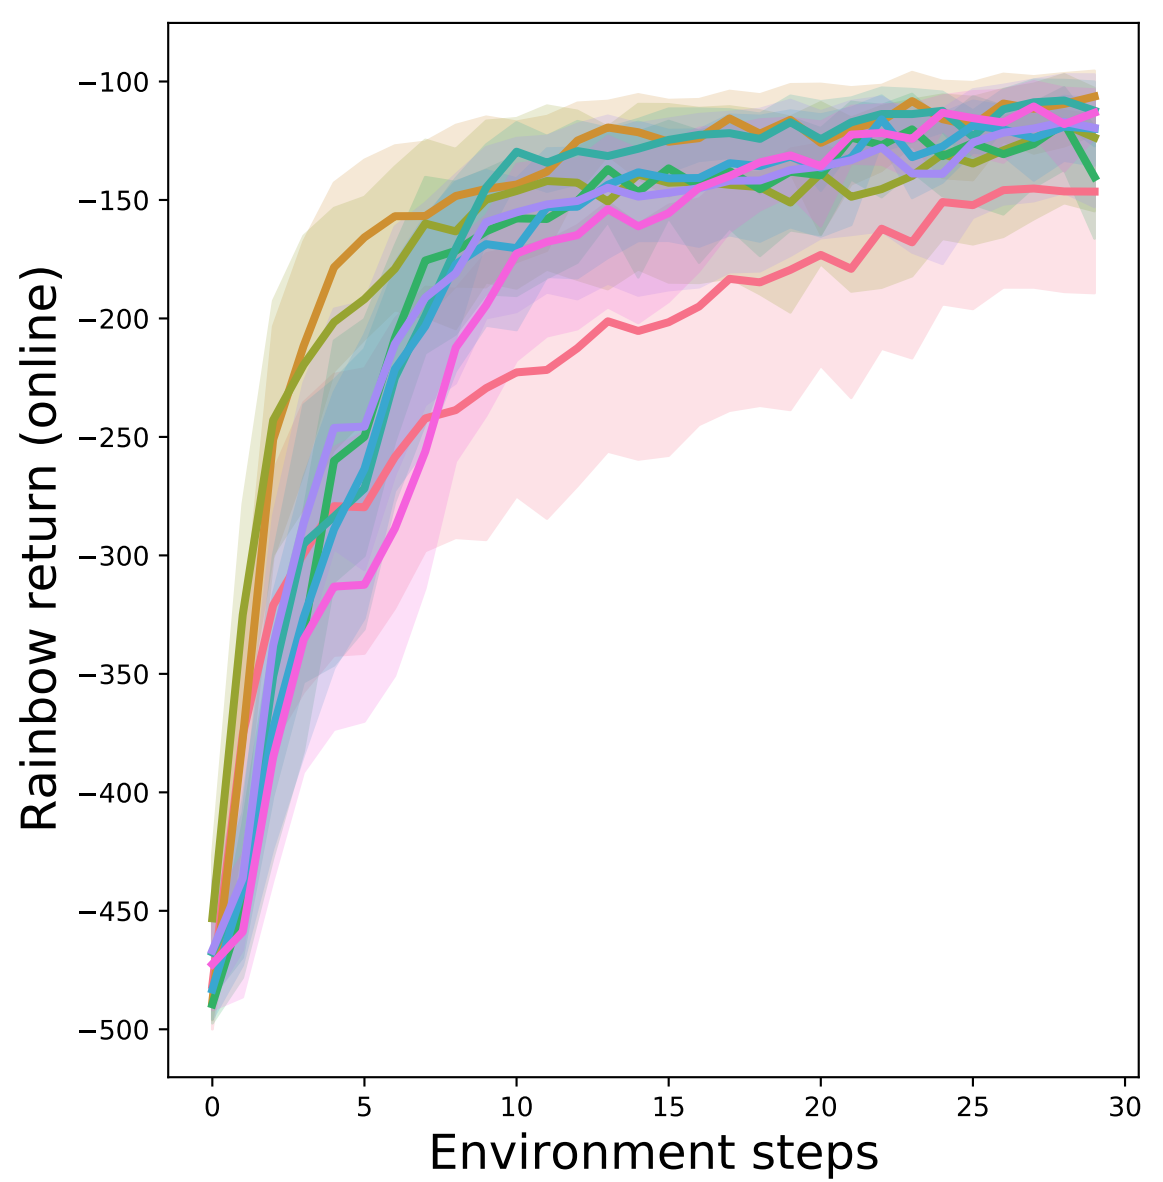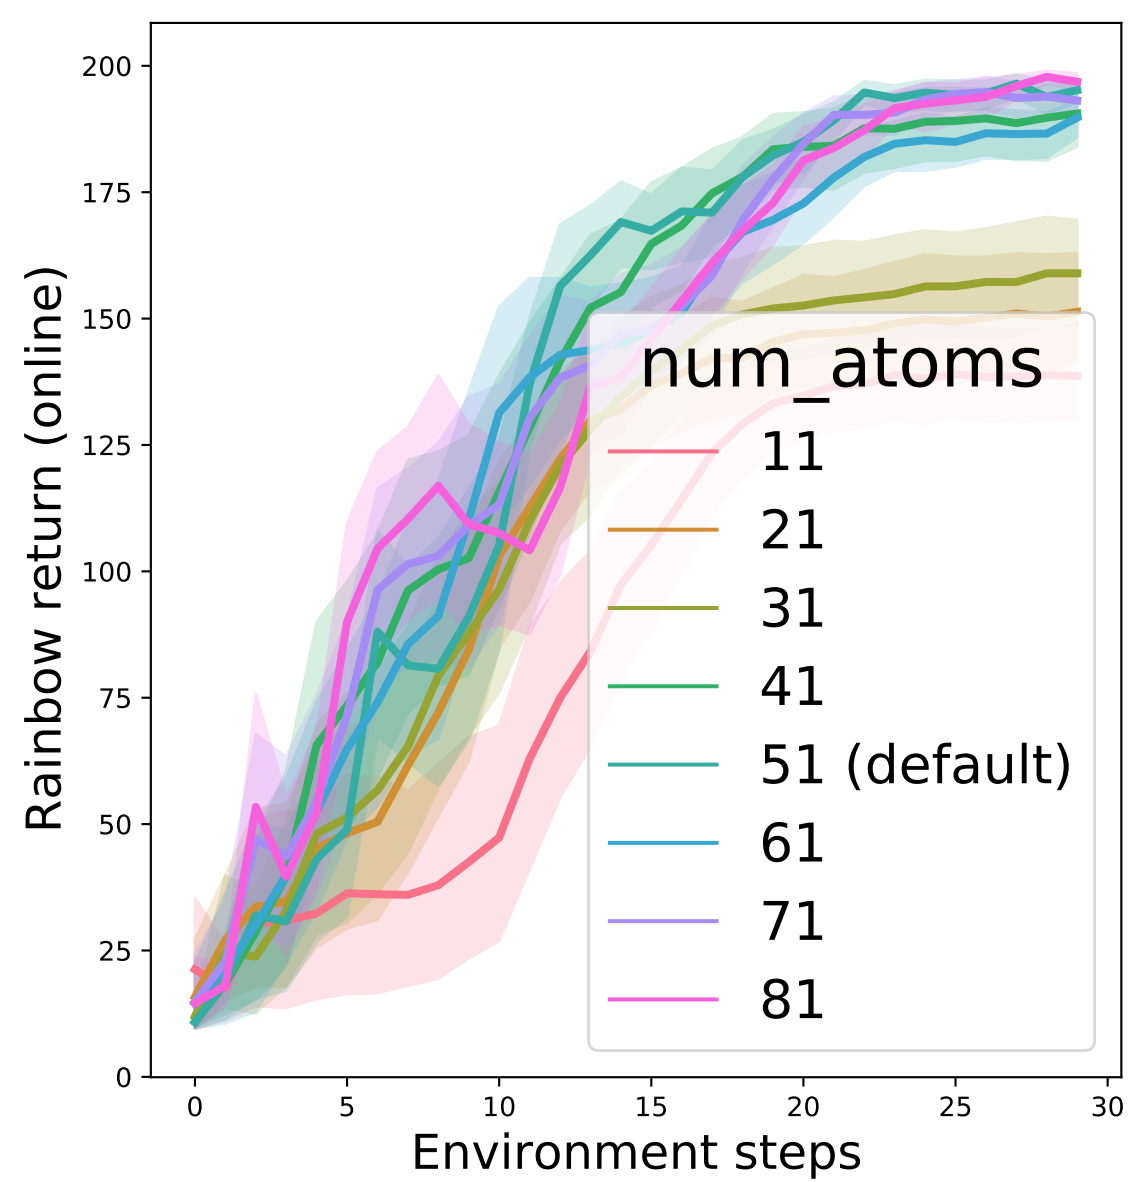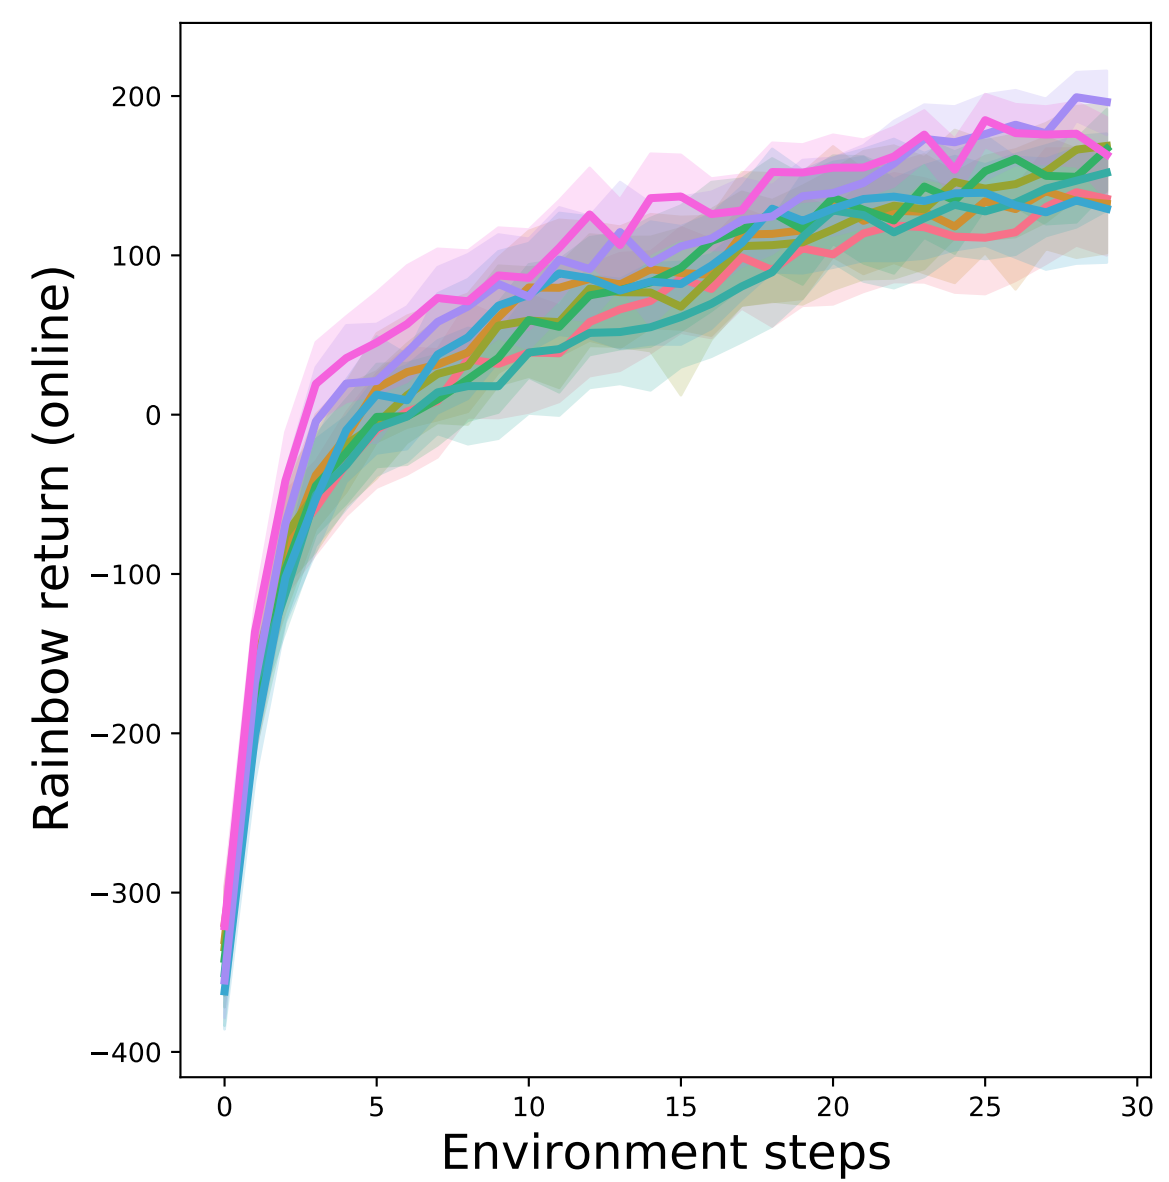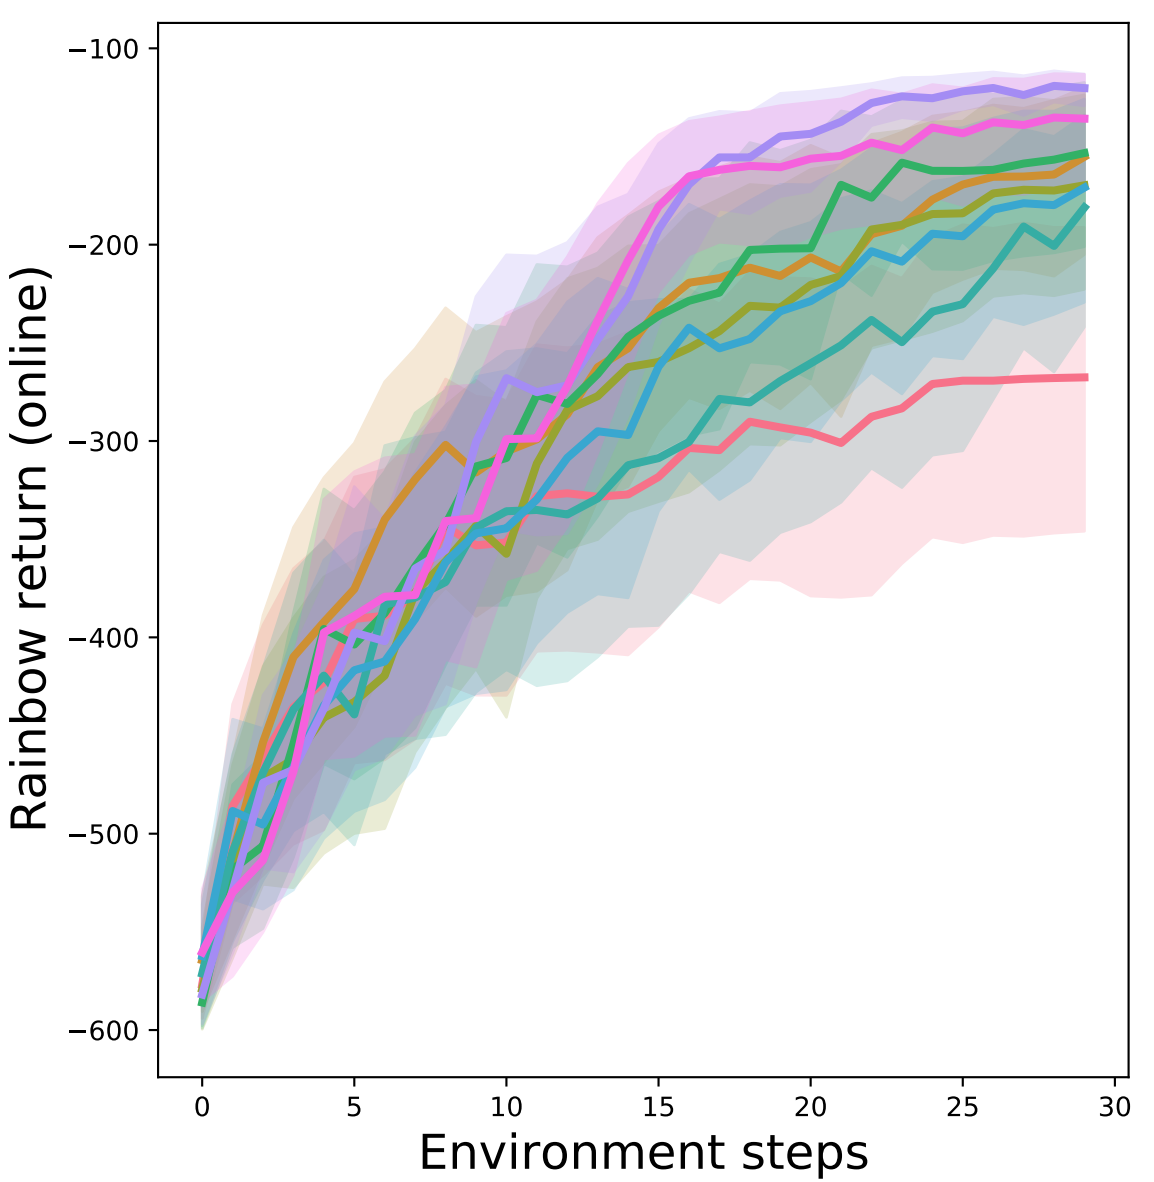

Supplement: supplementary_material [file attachment]

Acrobot

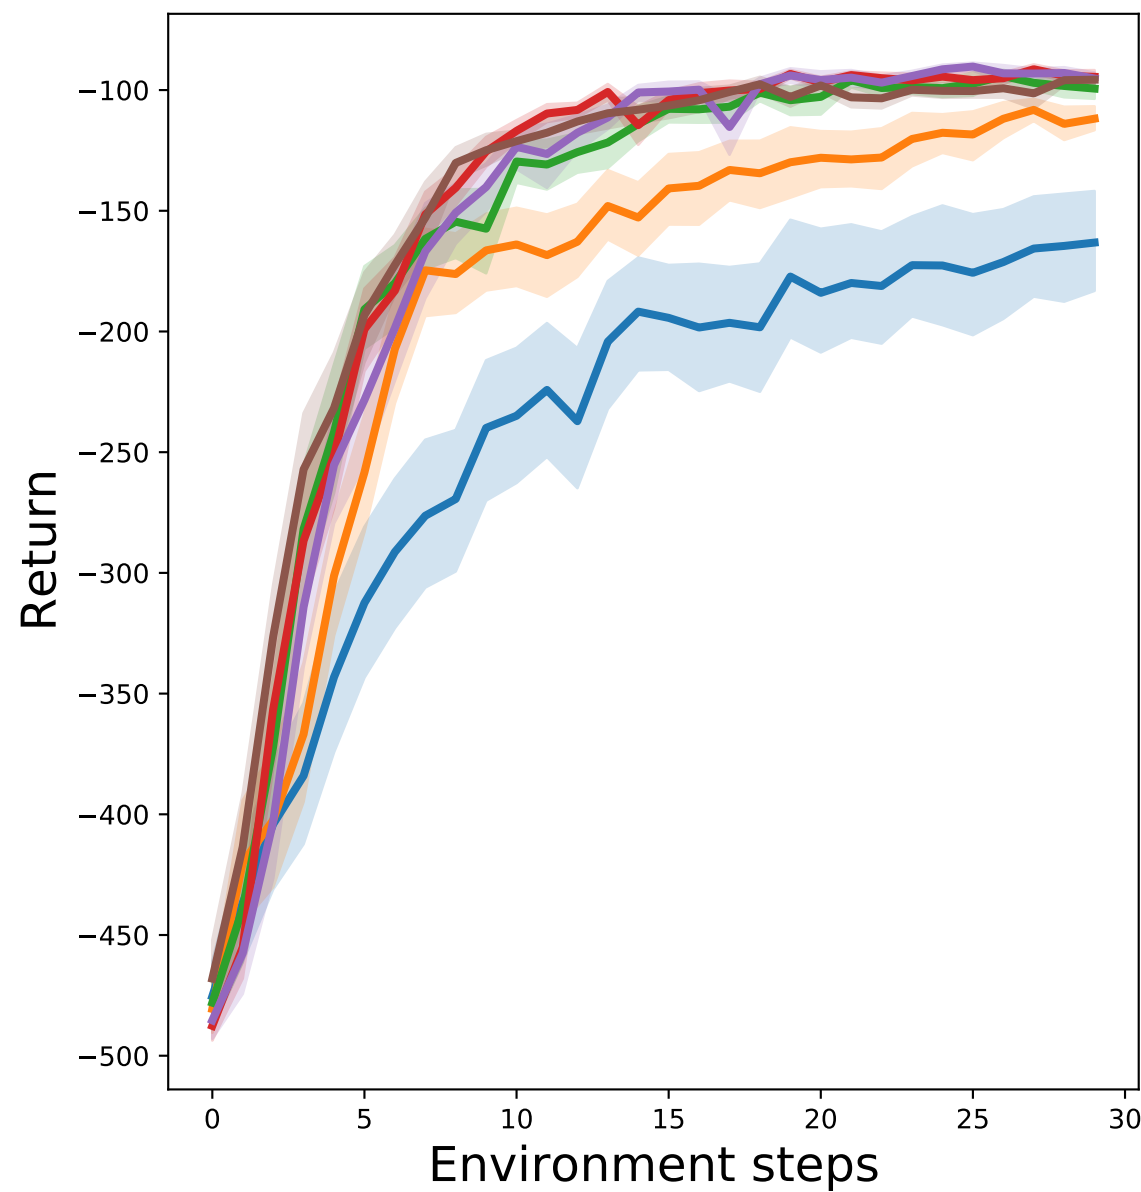

CartPole

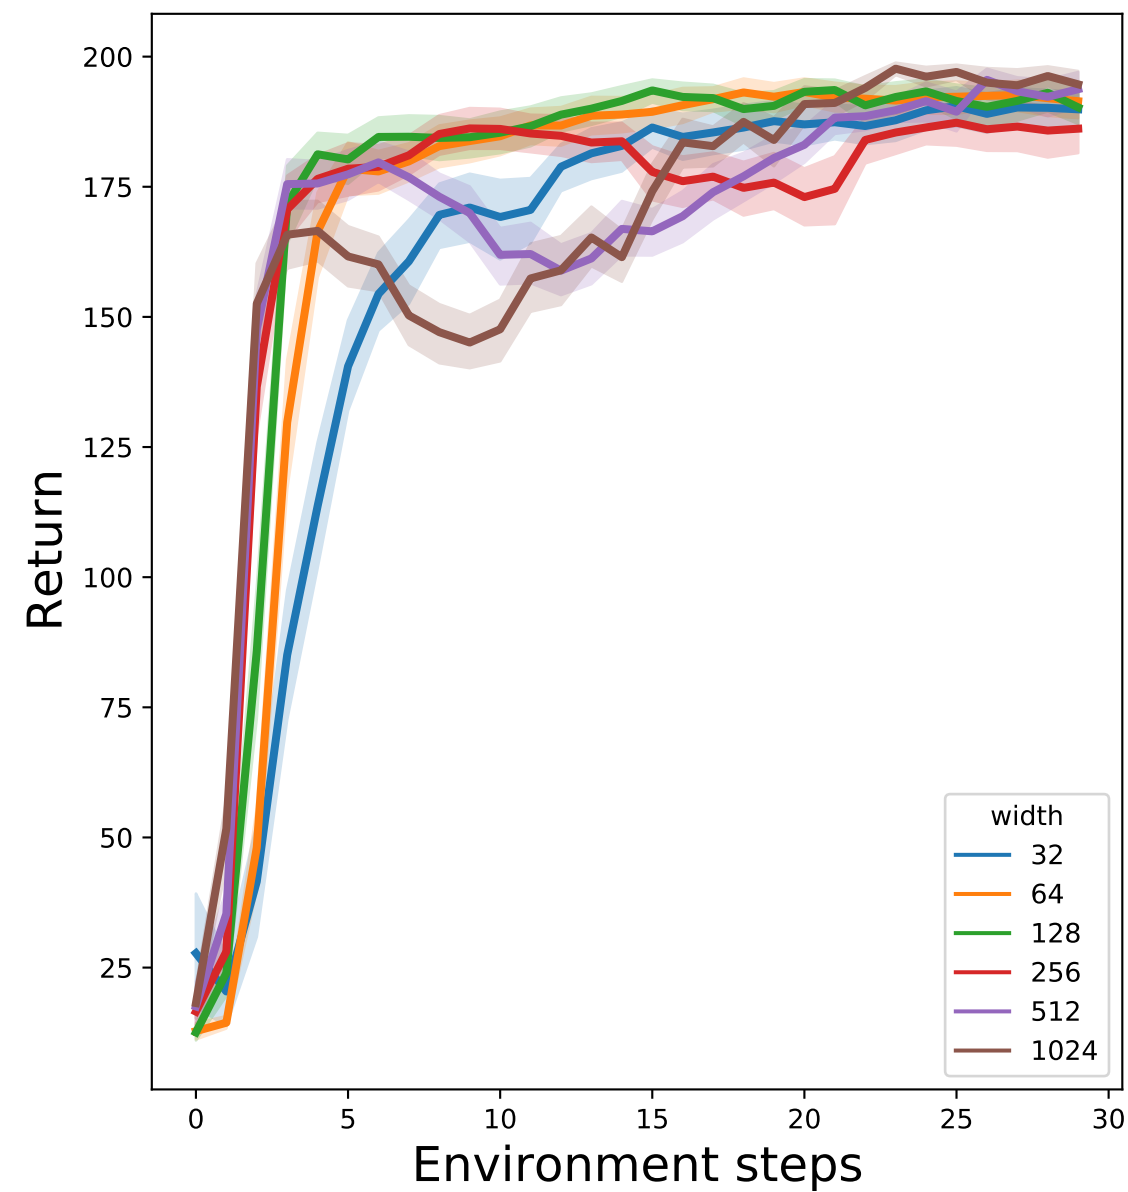

LunarLander

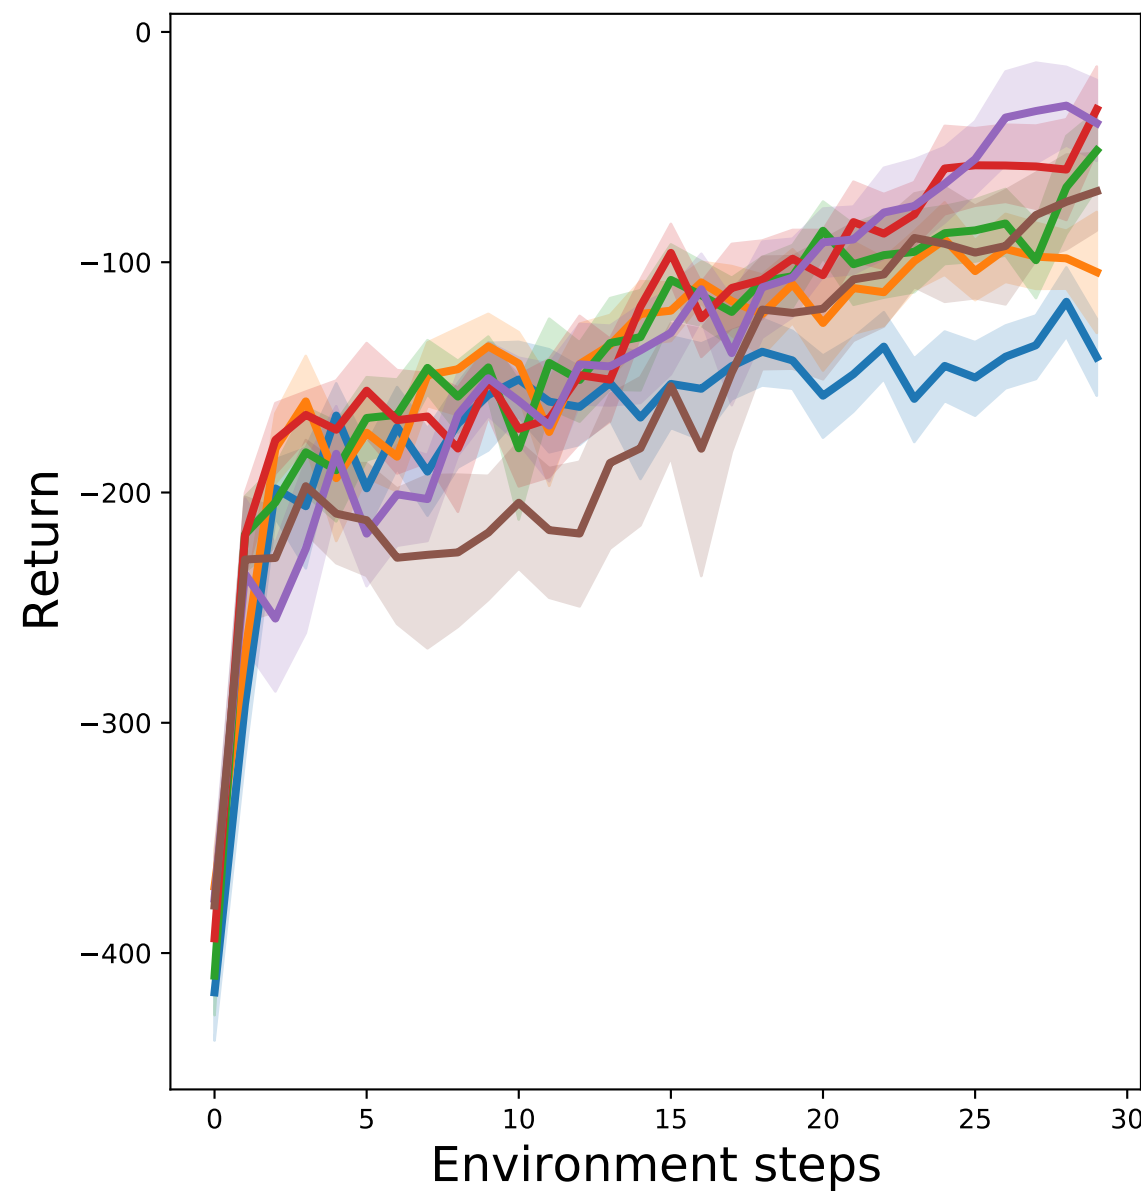

MountainCar

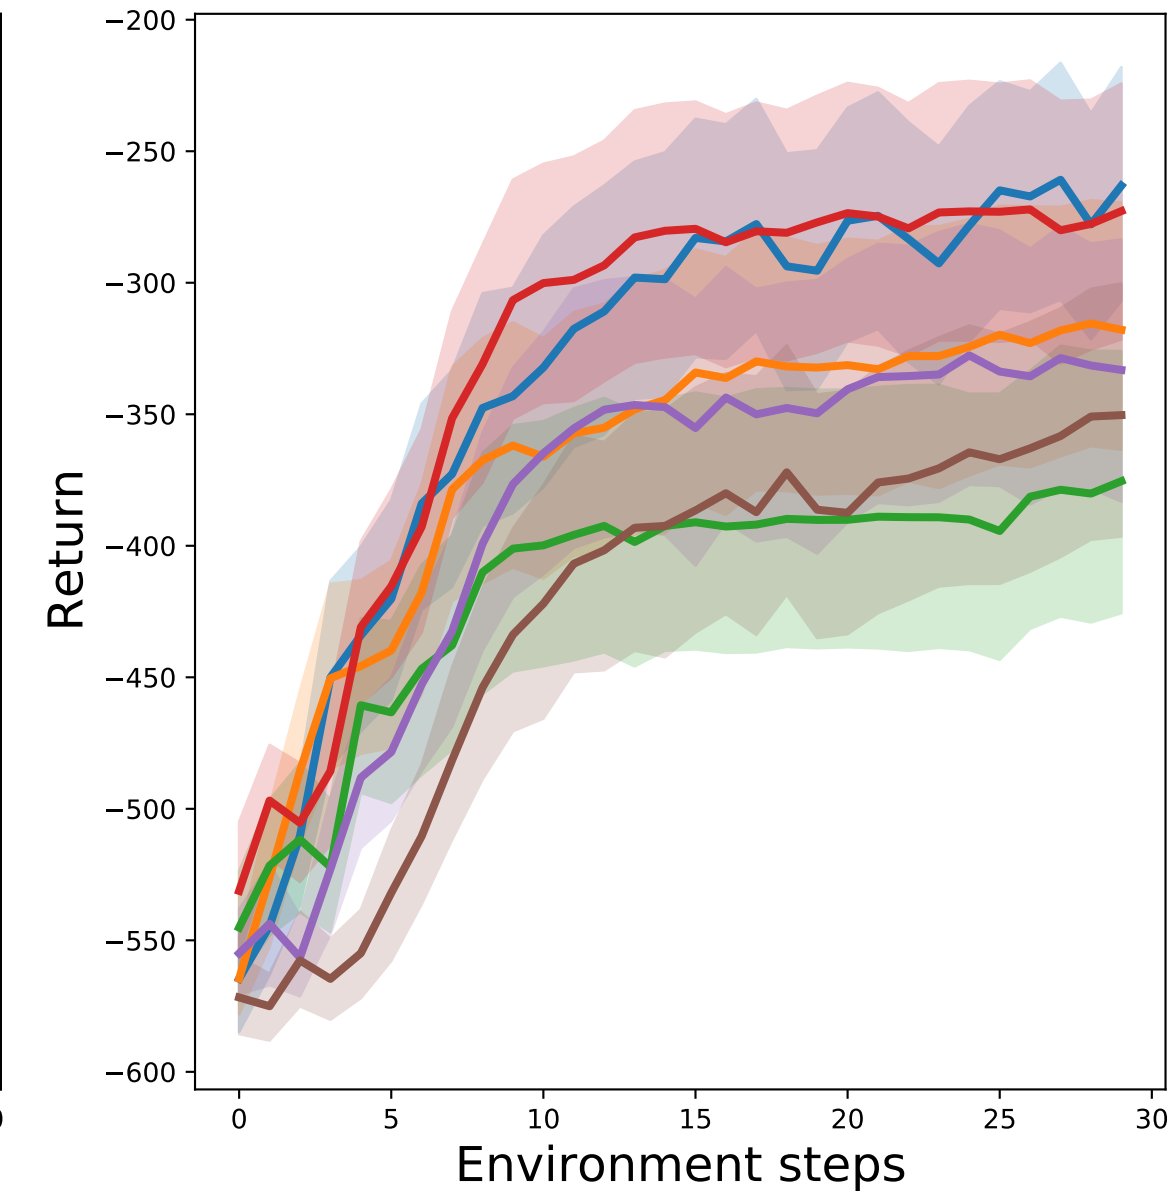

Acrobot

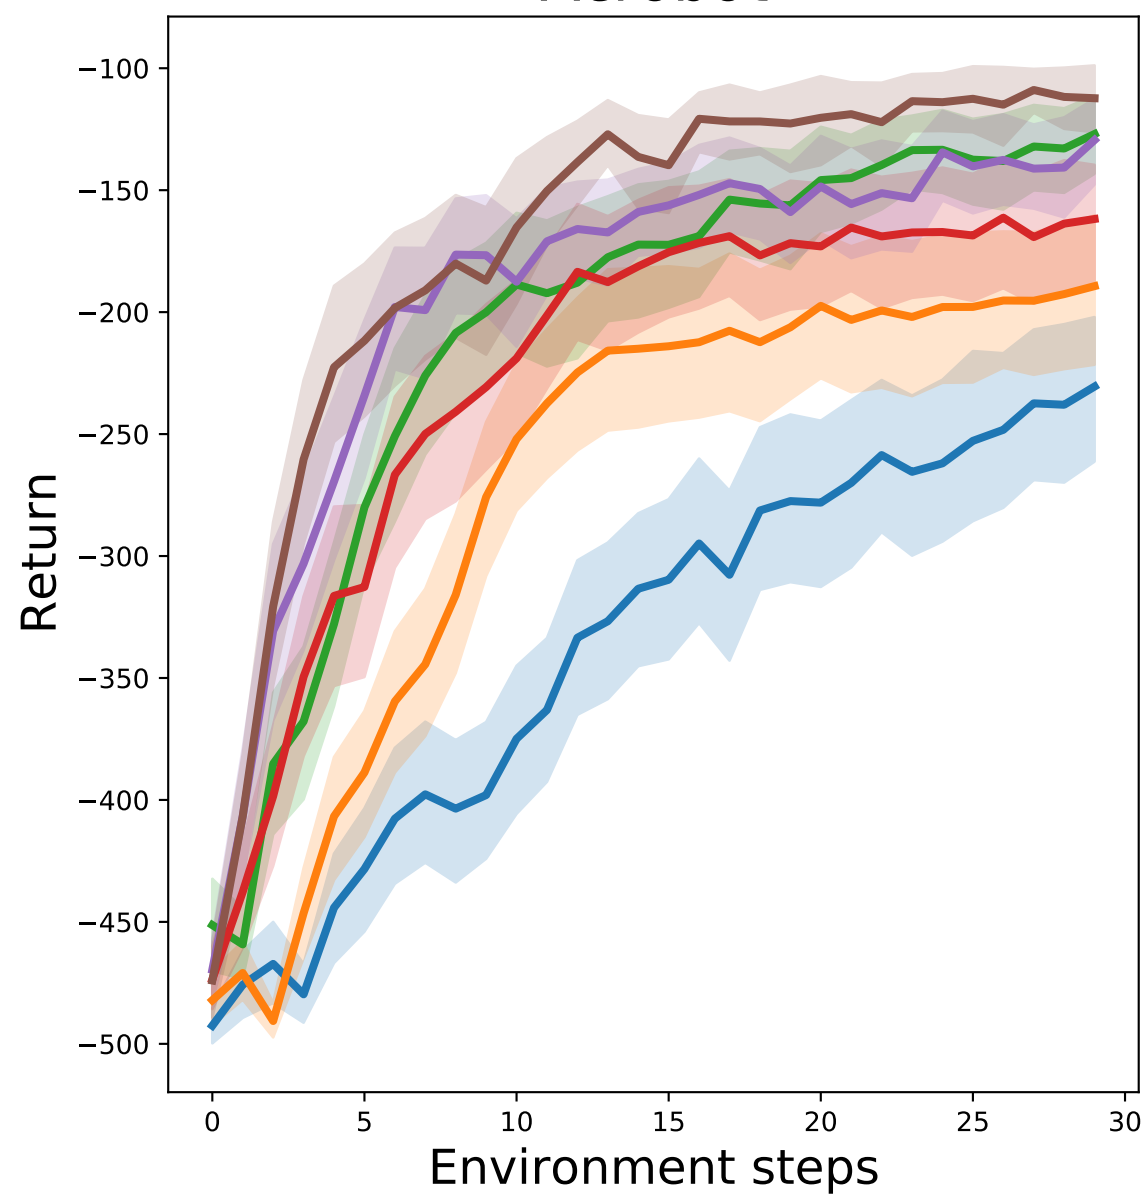

CartPole

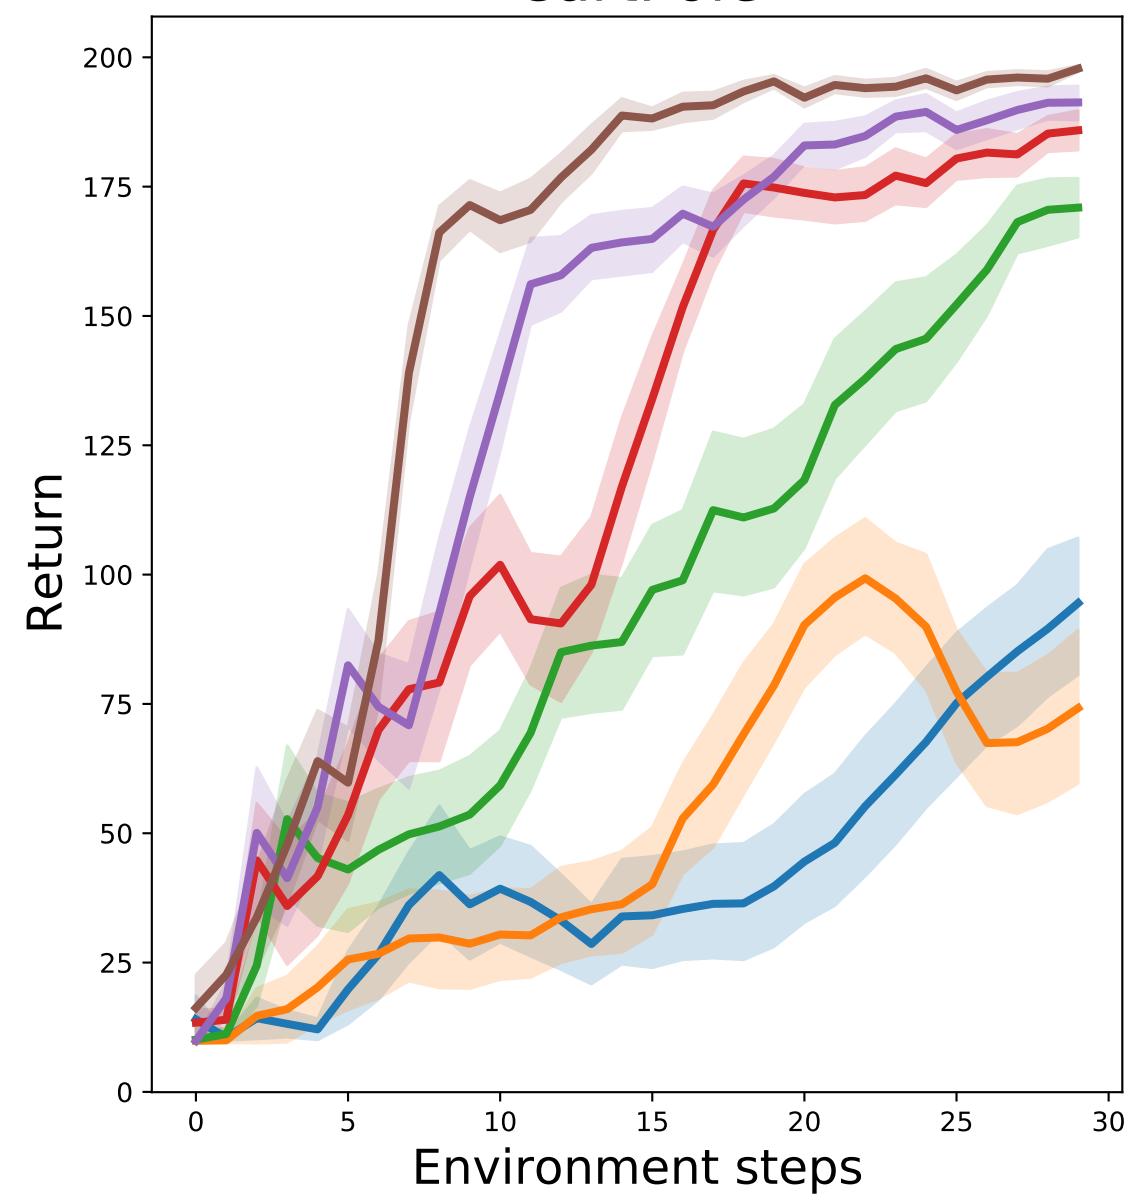

LunarLander

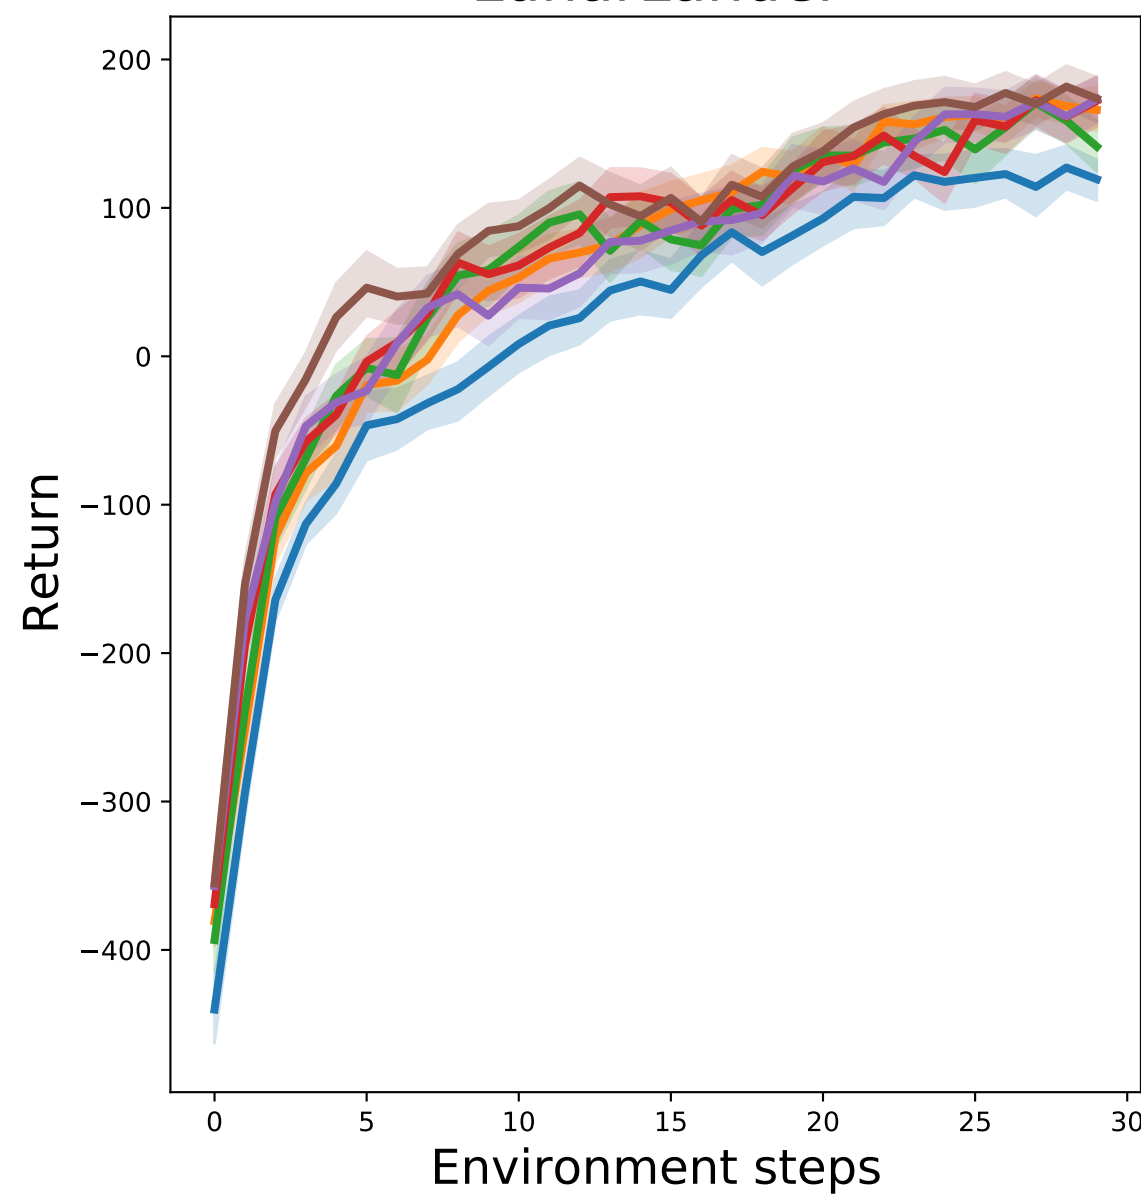

MountainCar

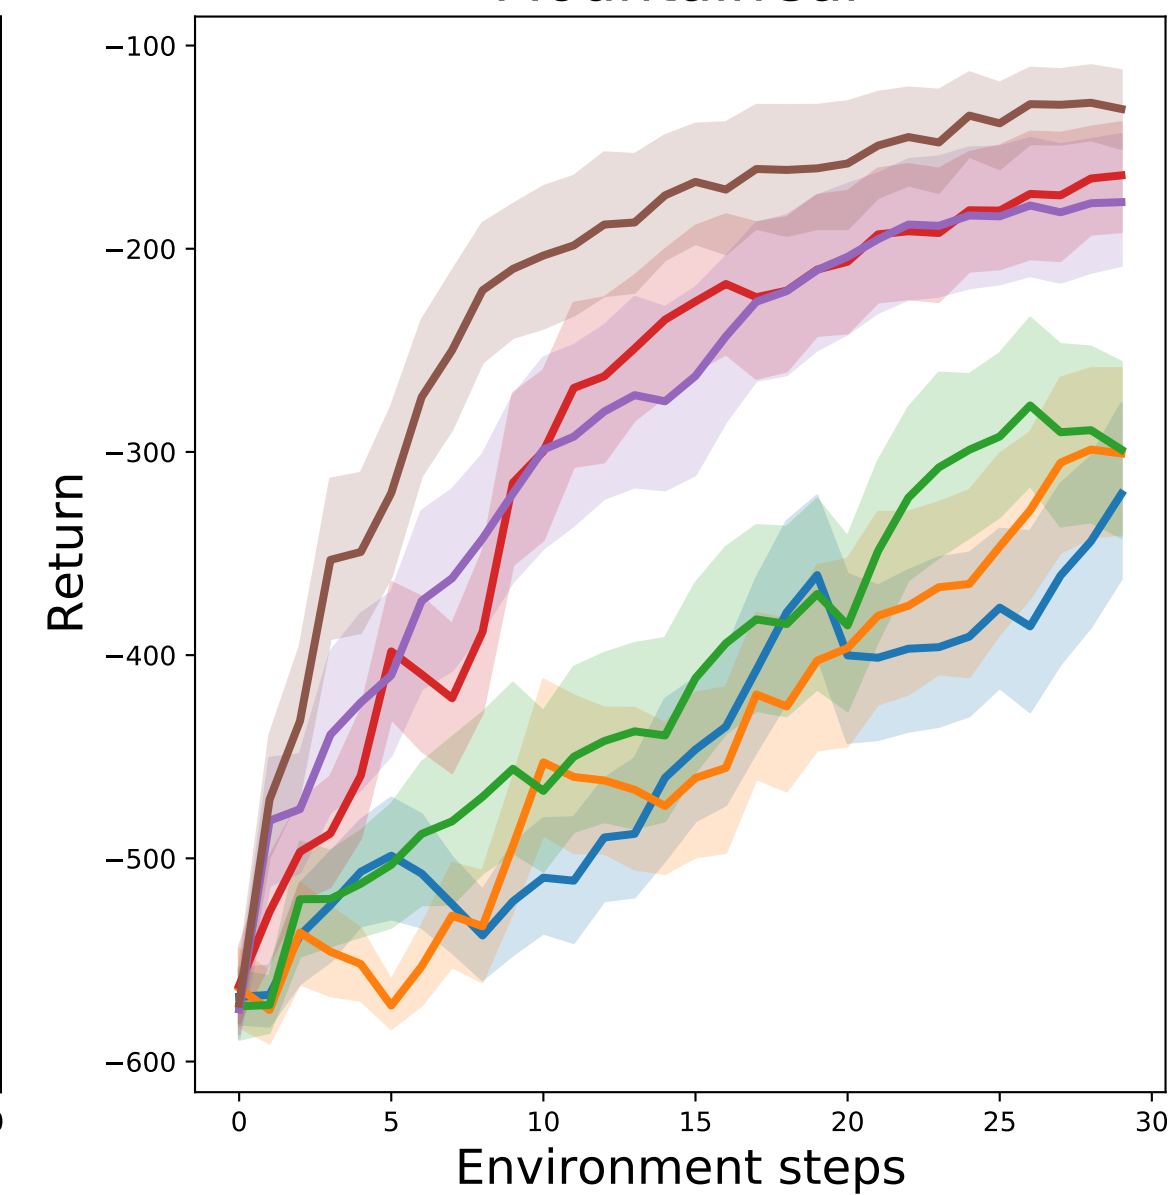

Supplement: supplementary_material [file attachment]

Acrobot

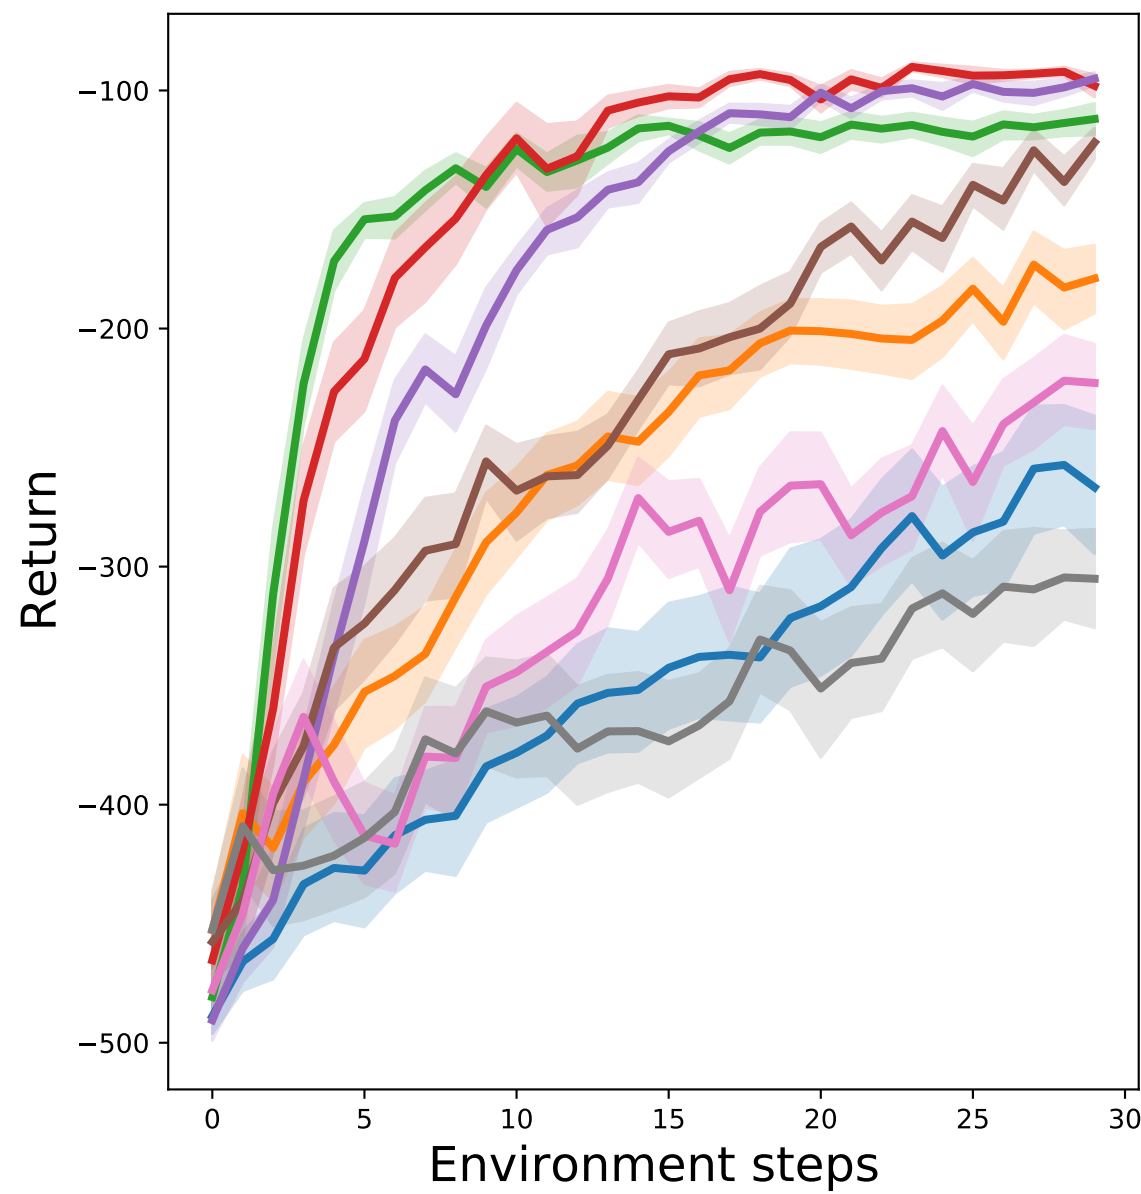

CartPole

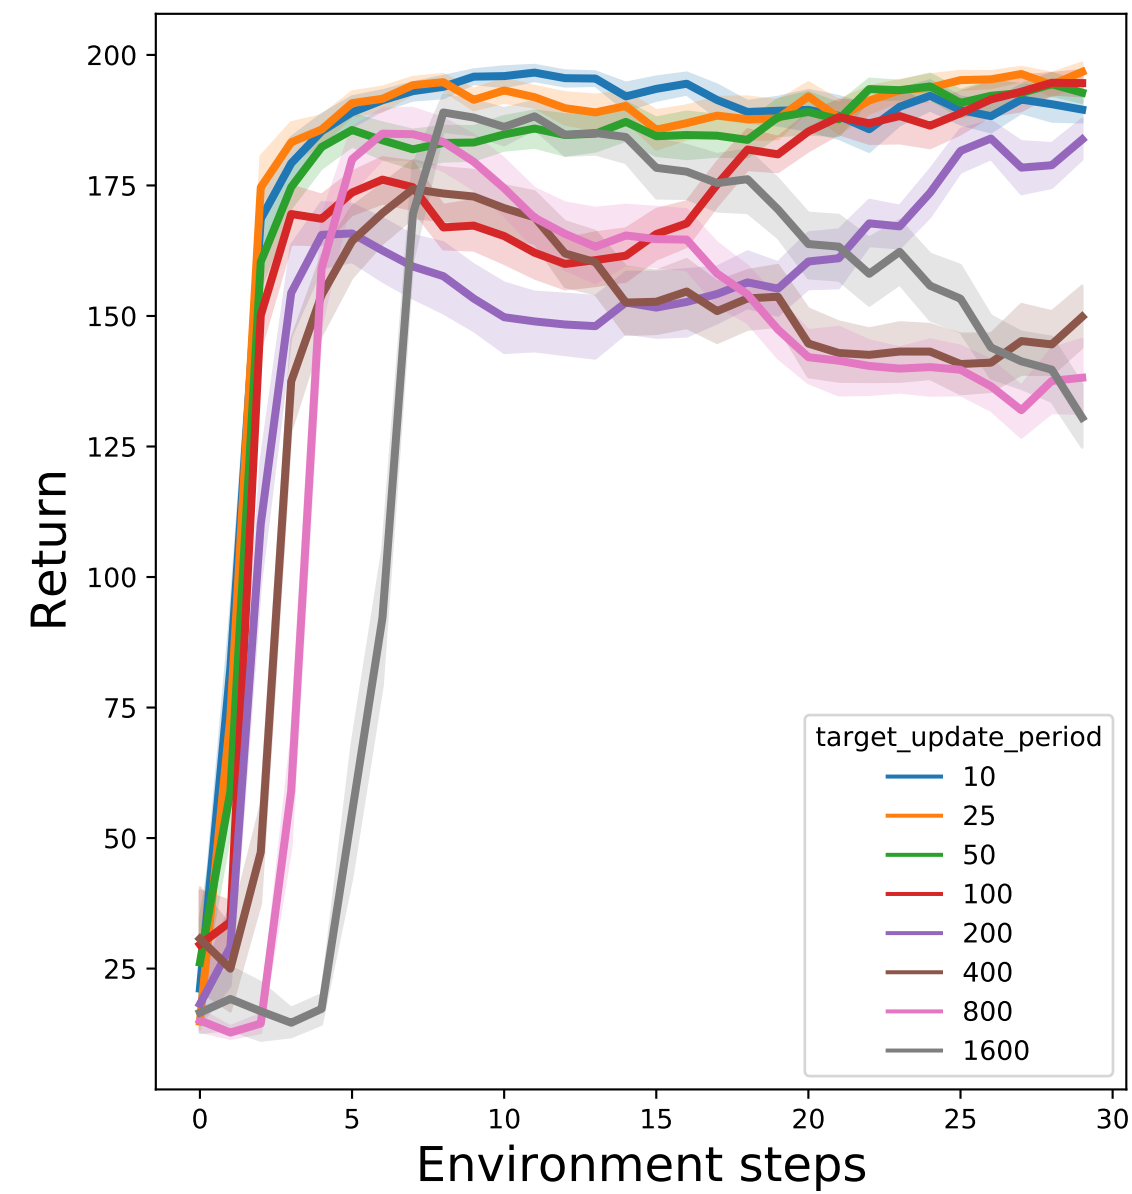

LunarLander

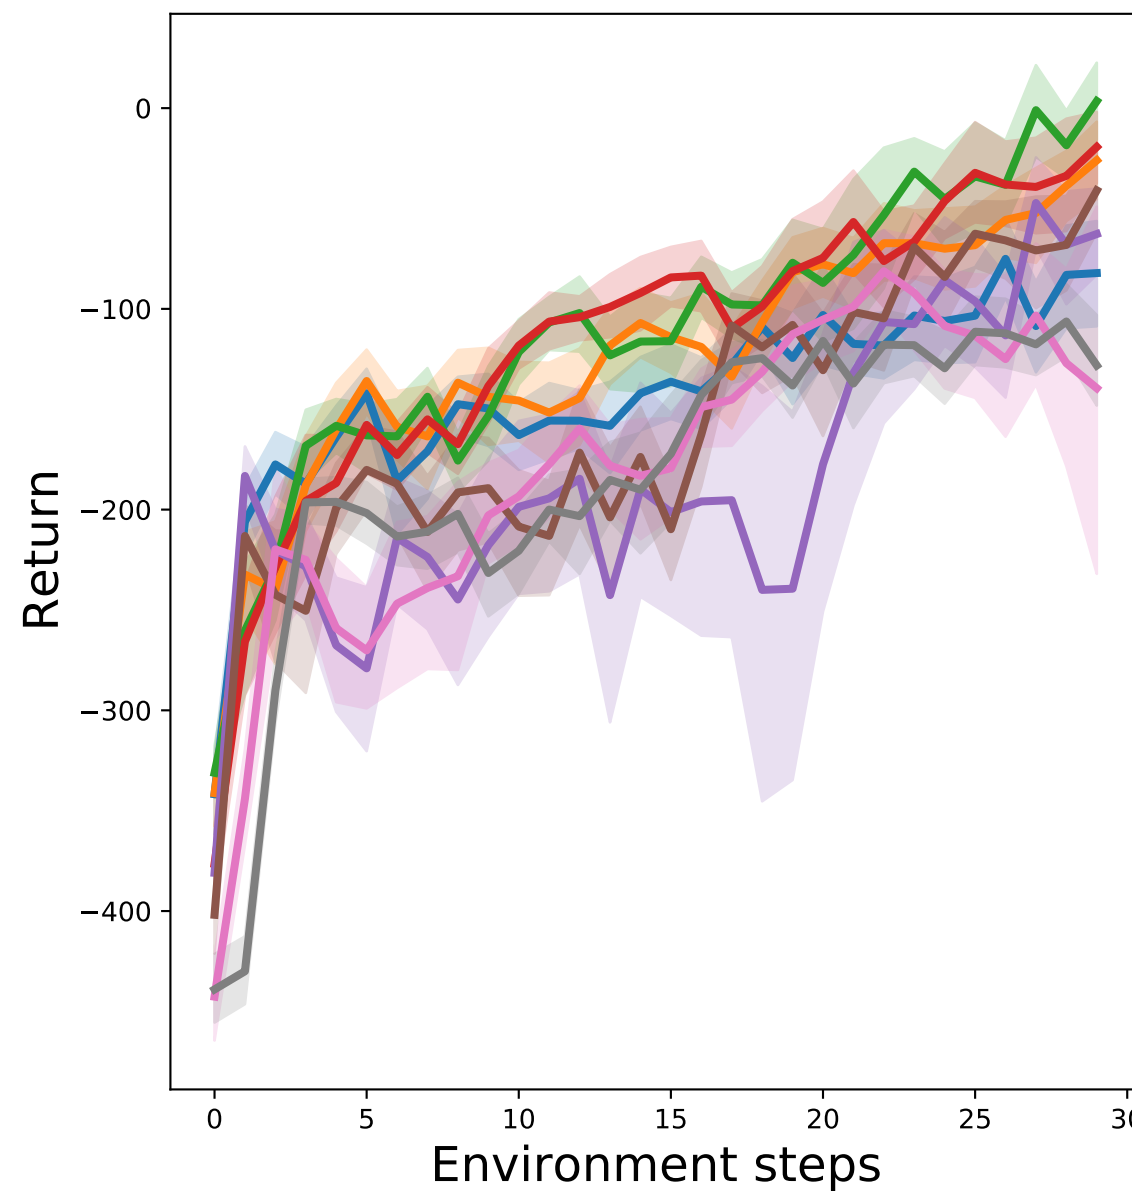

MountainCar

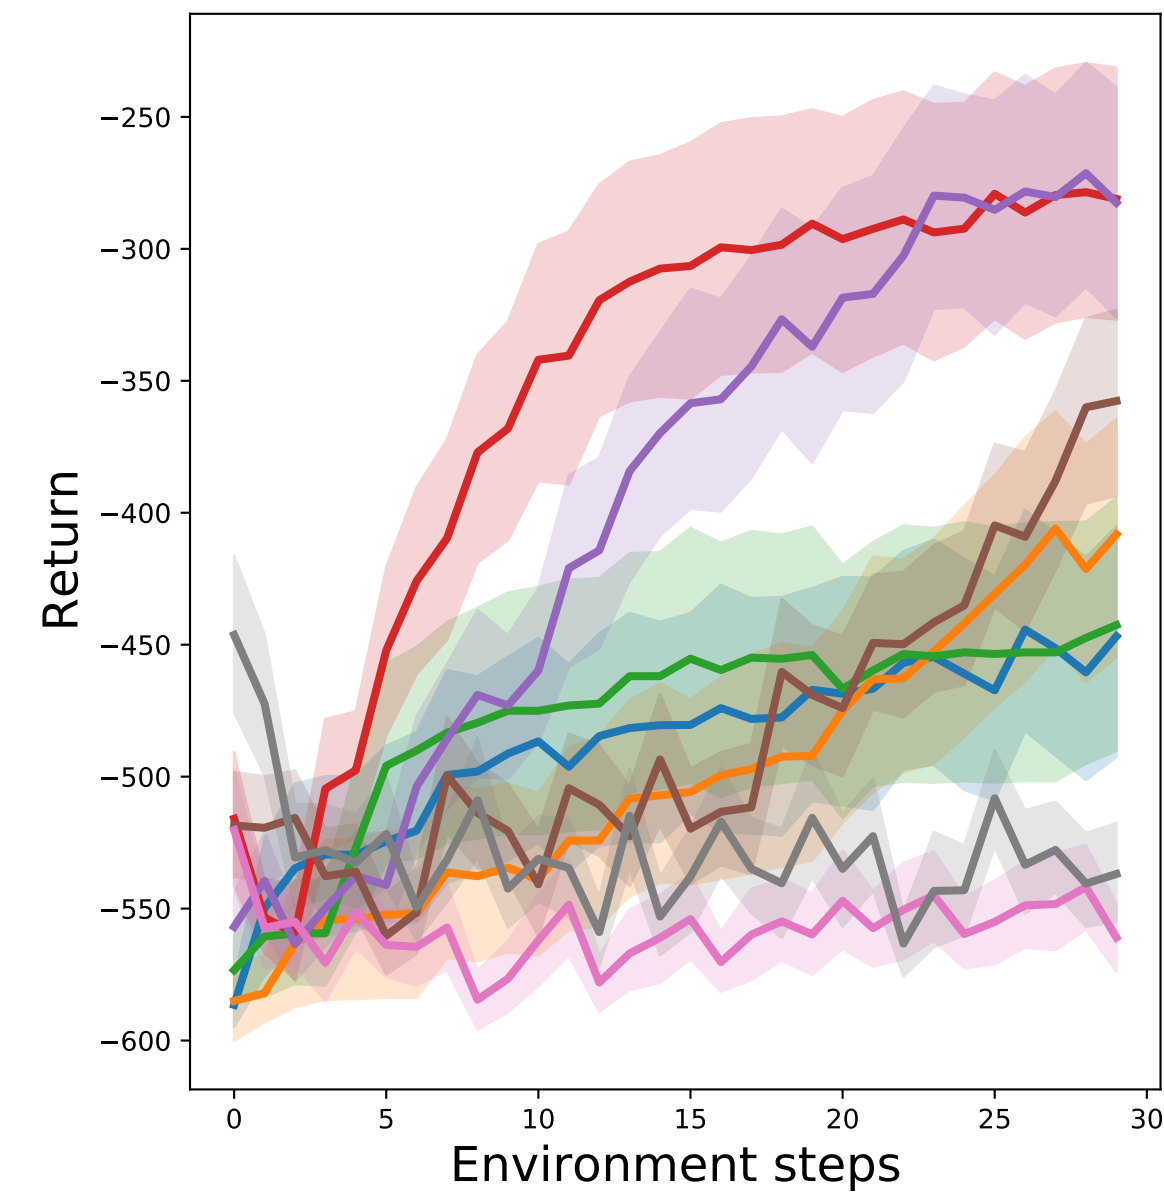

Acrobot

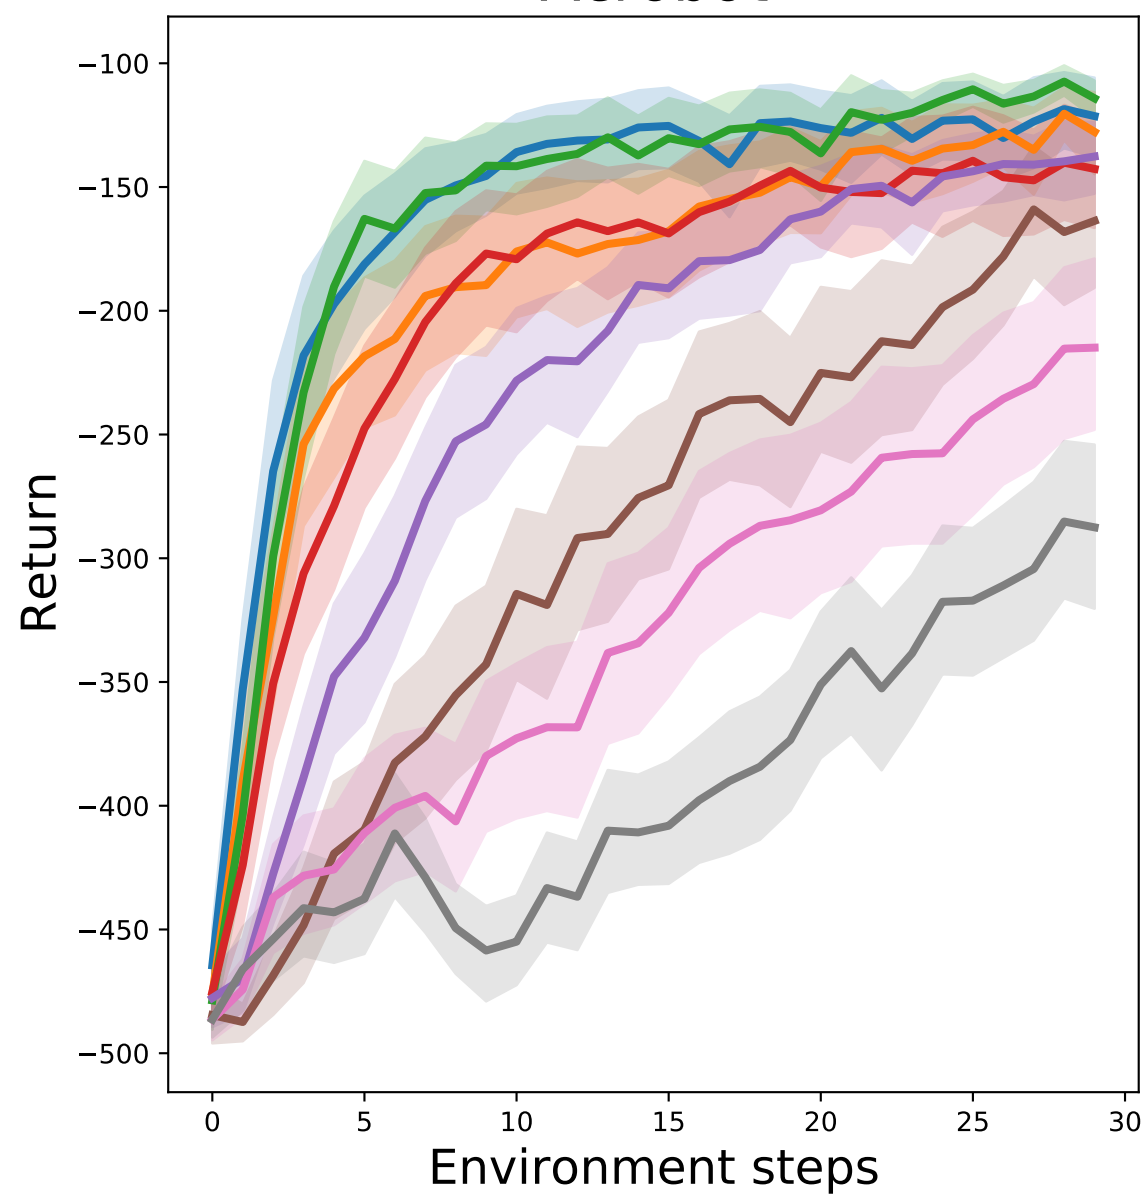

CartPole

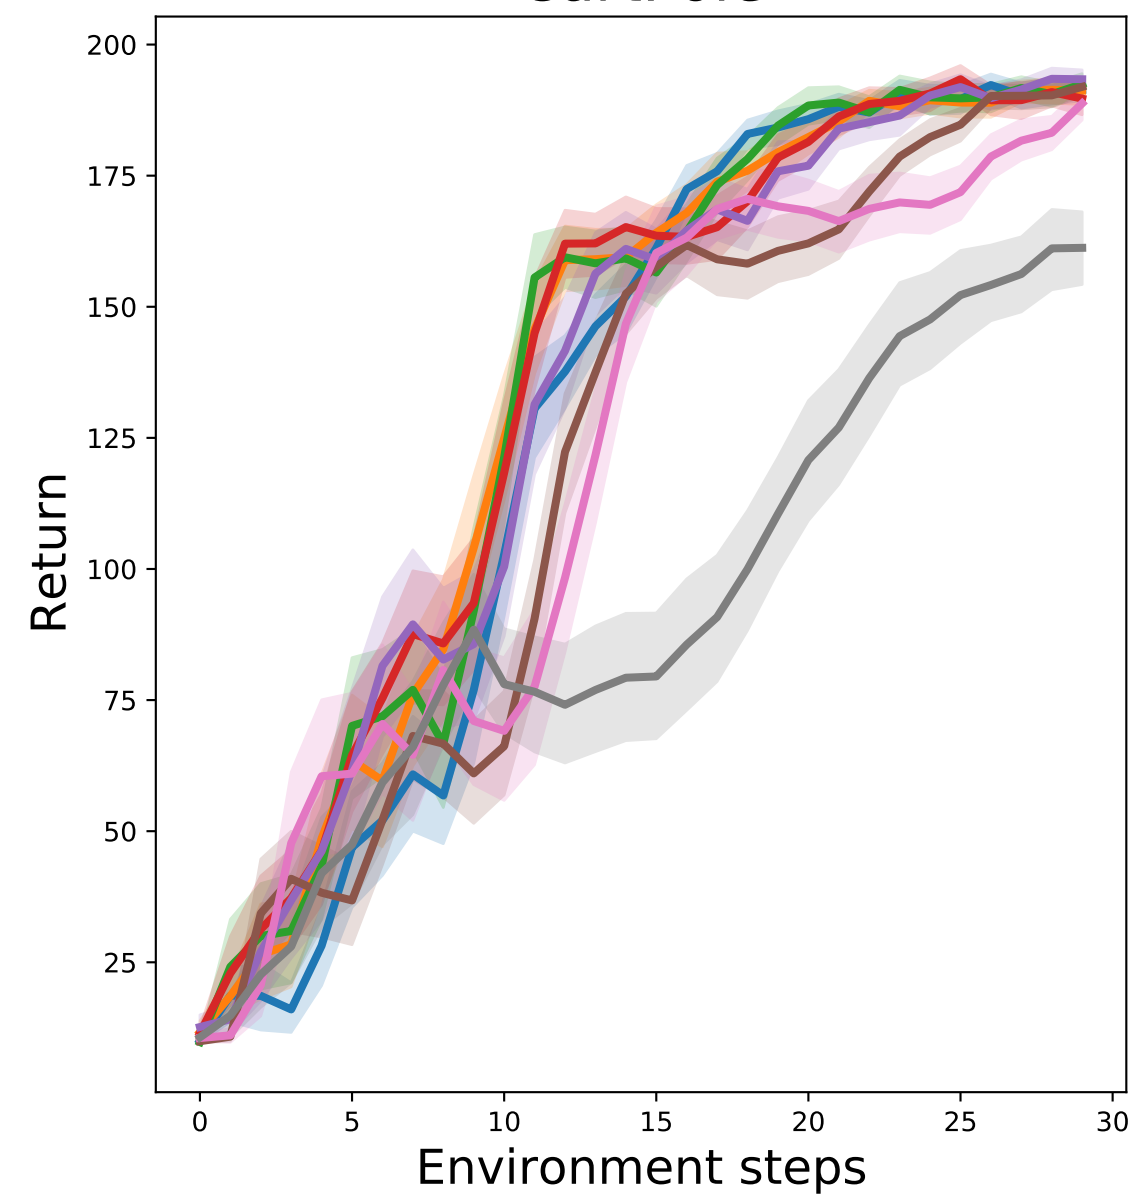

LunarLander

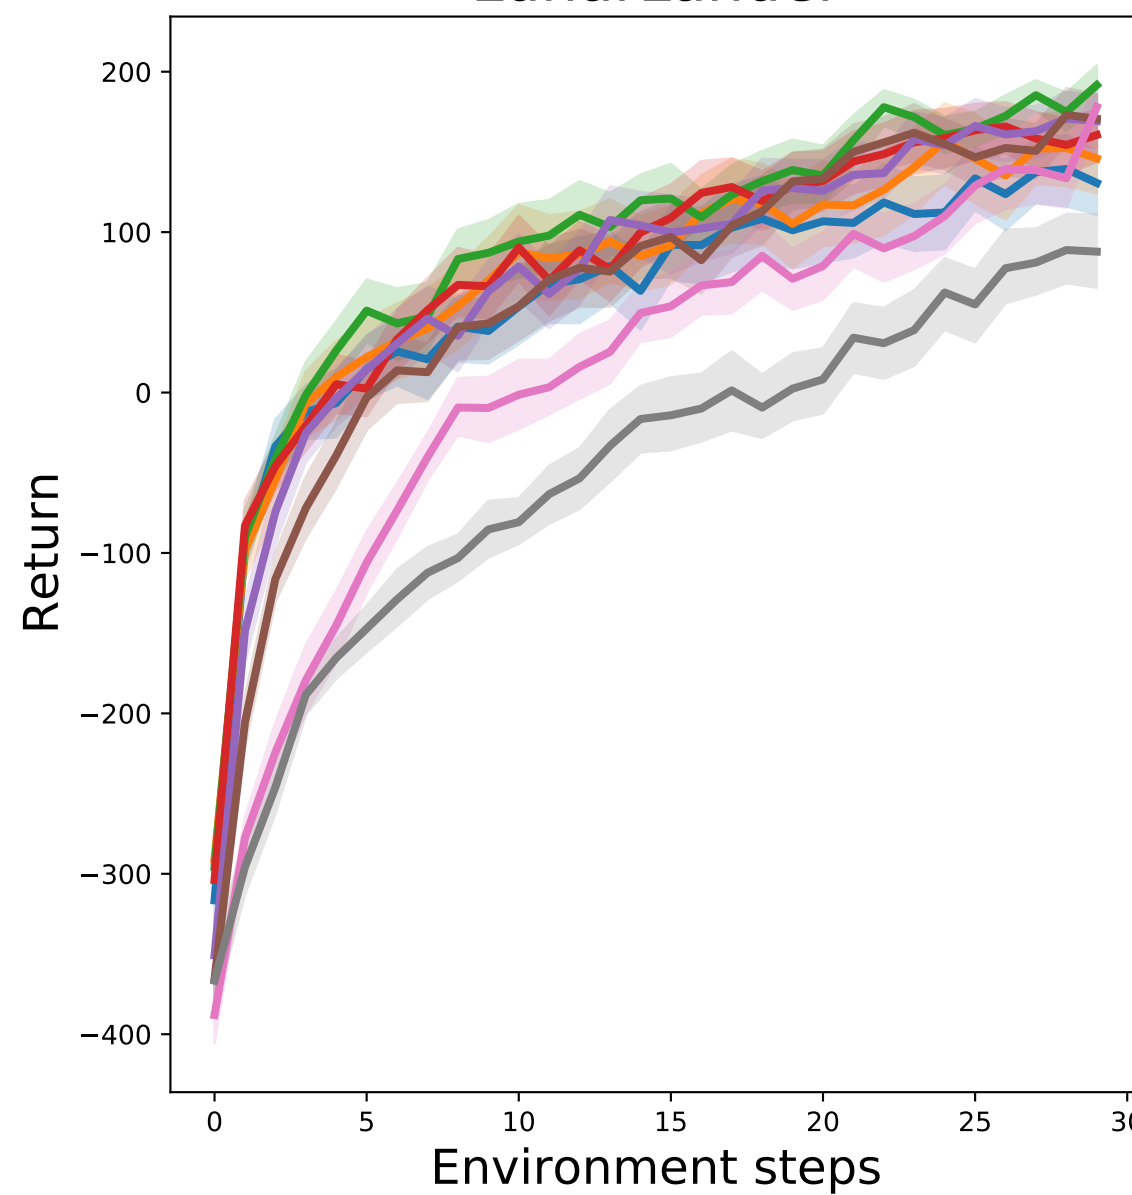

MountainCar

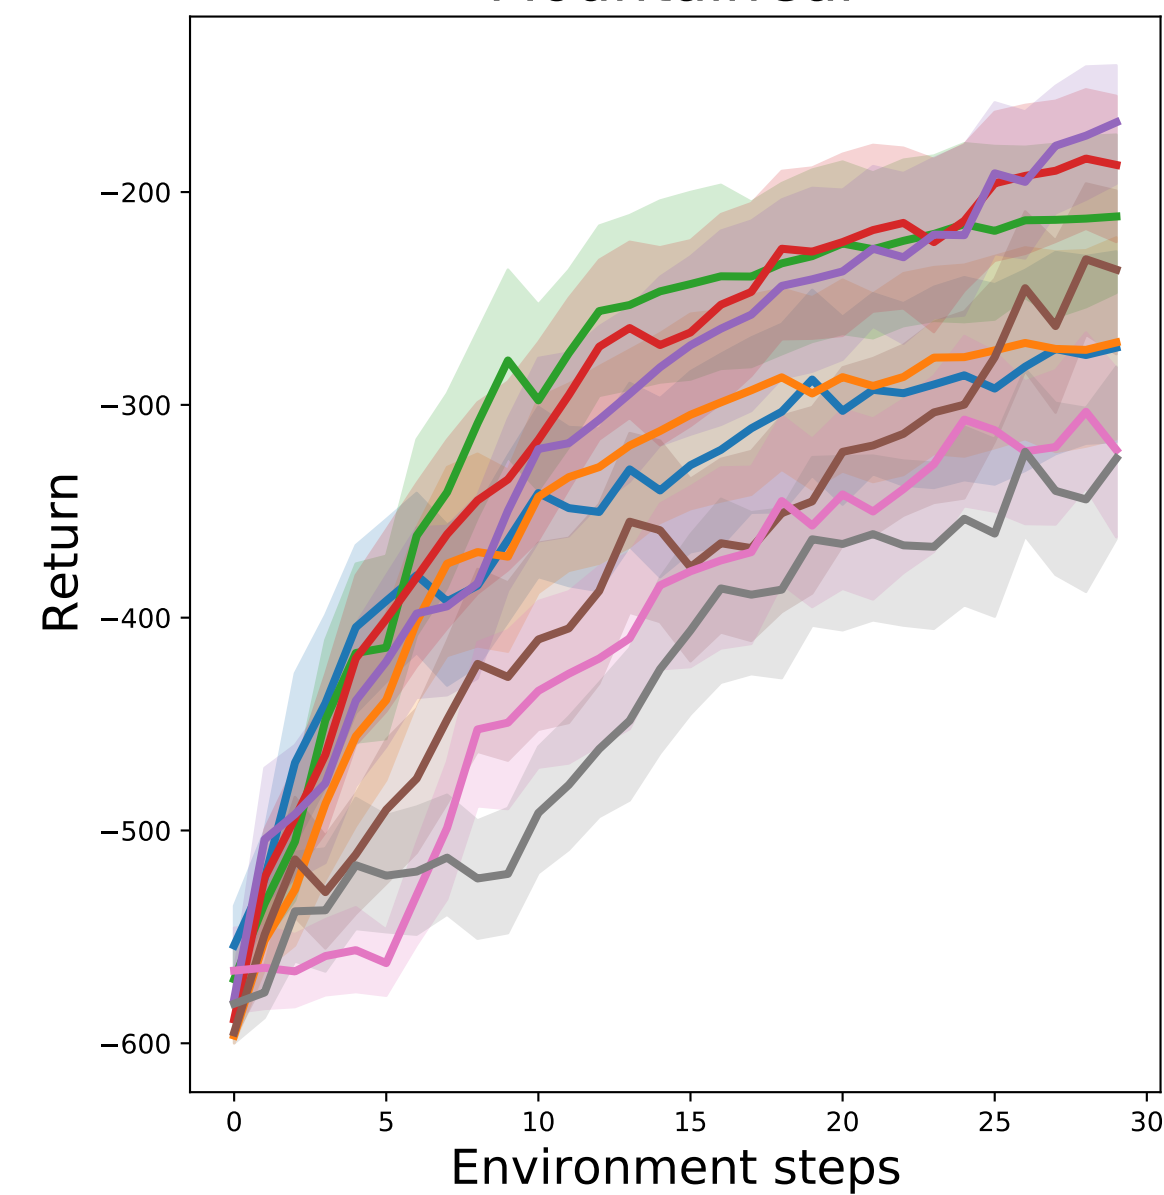

Supplement: supplementary_material [file attachment]

Acrobot

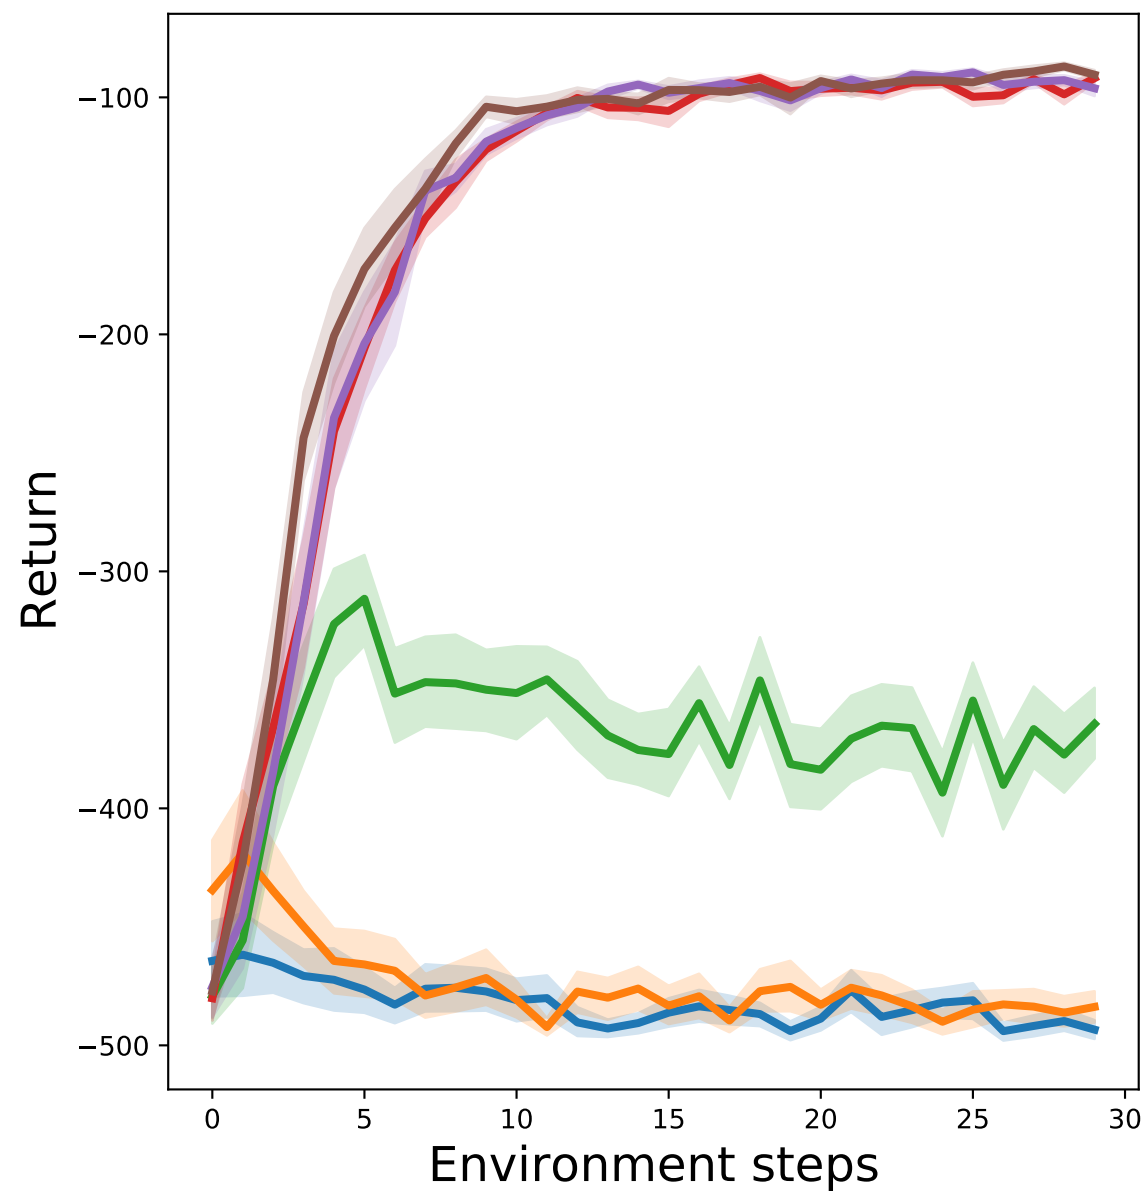

CartPole

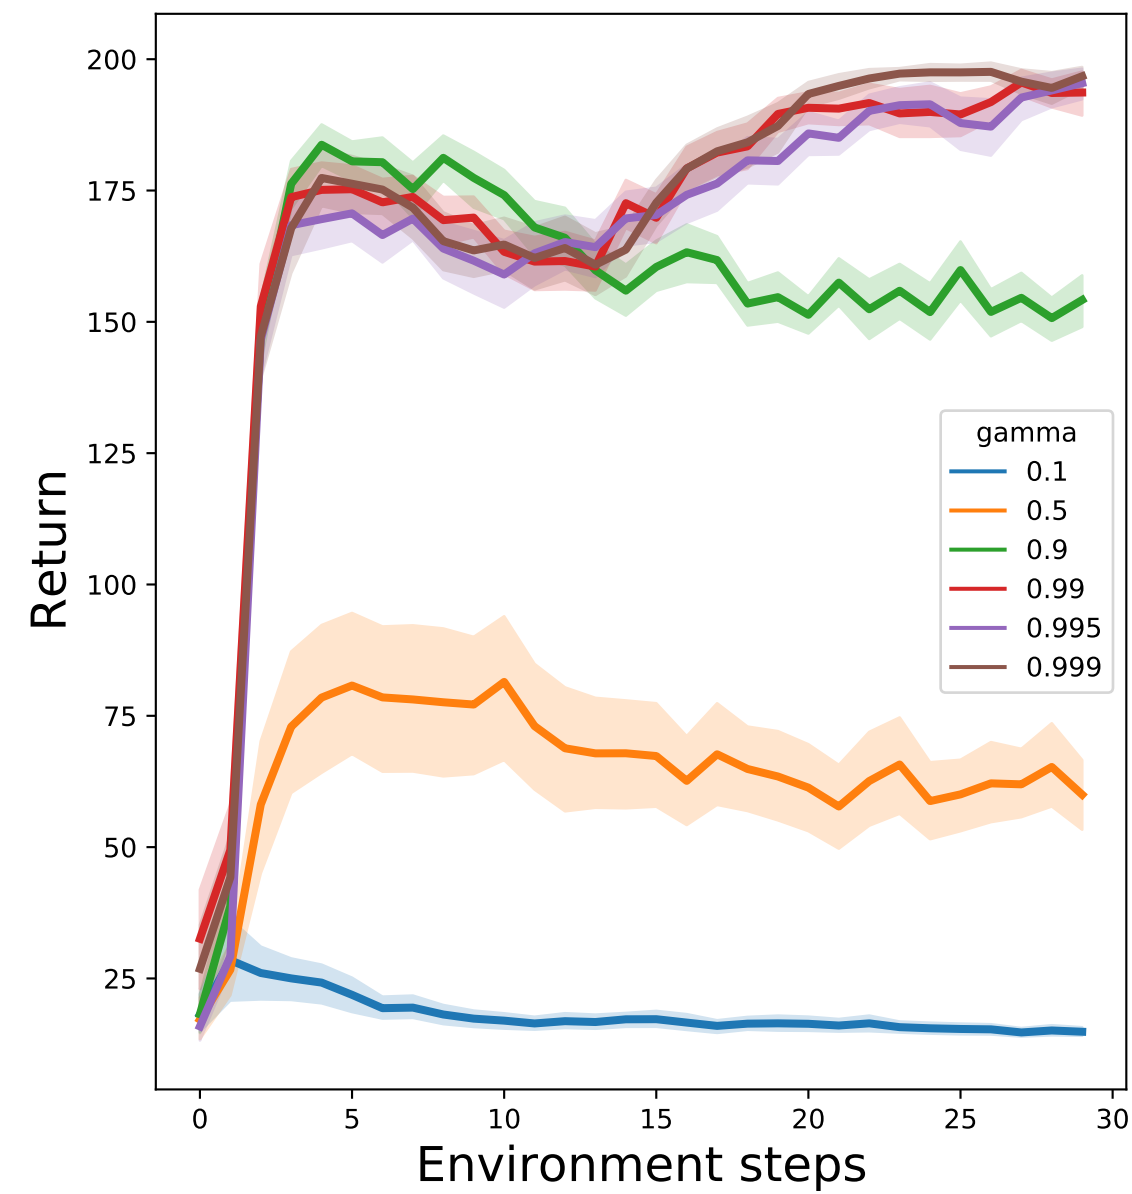

LunarLander

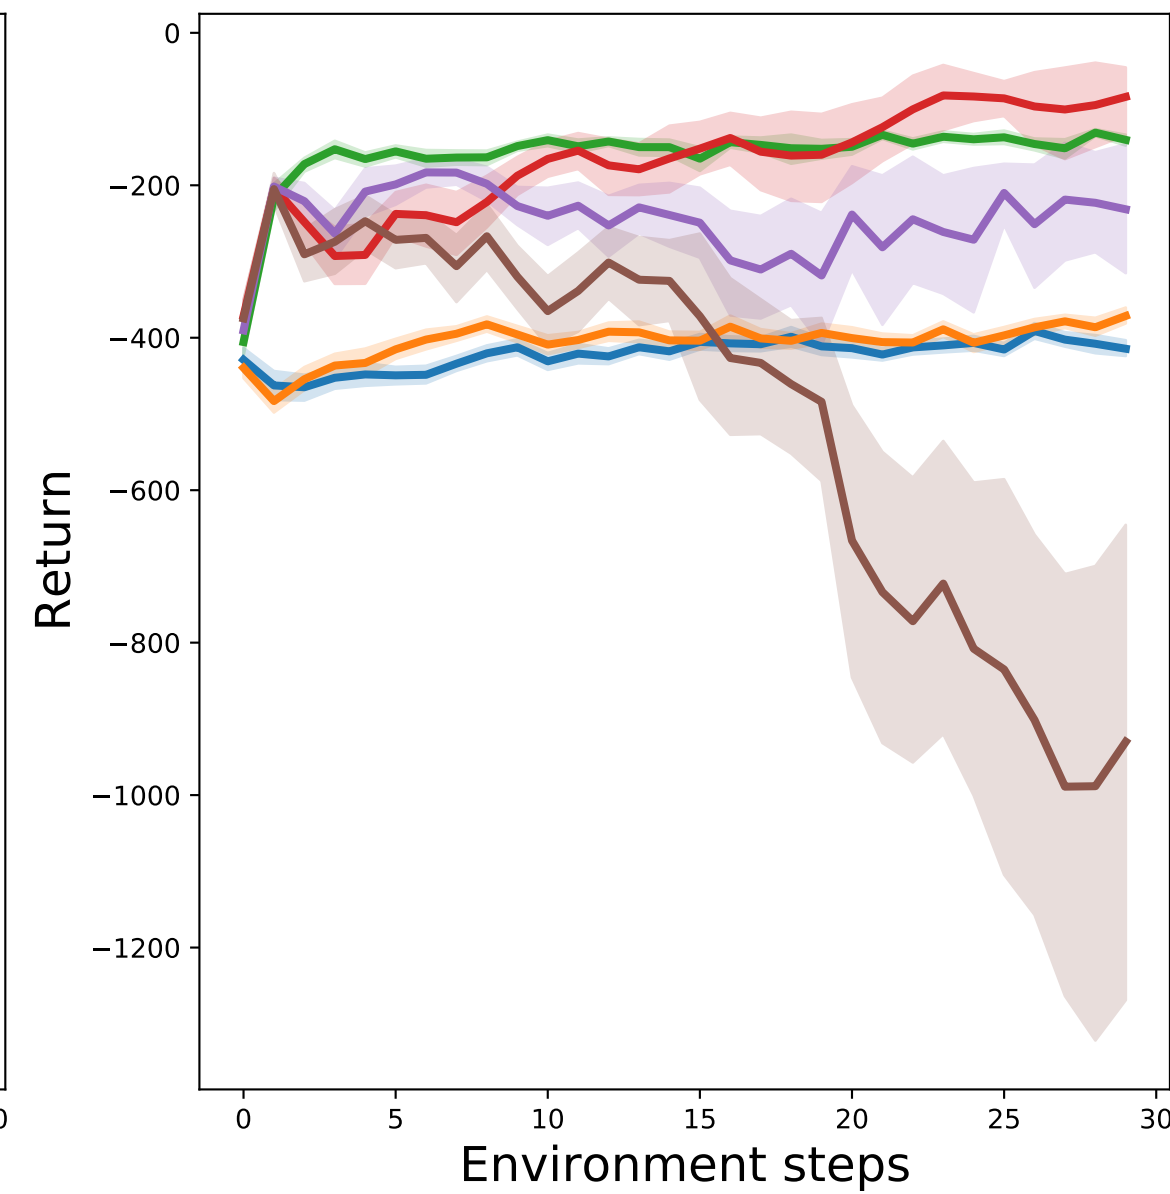

MountainCar

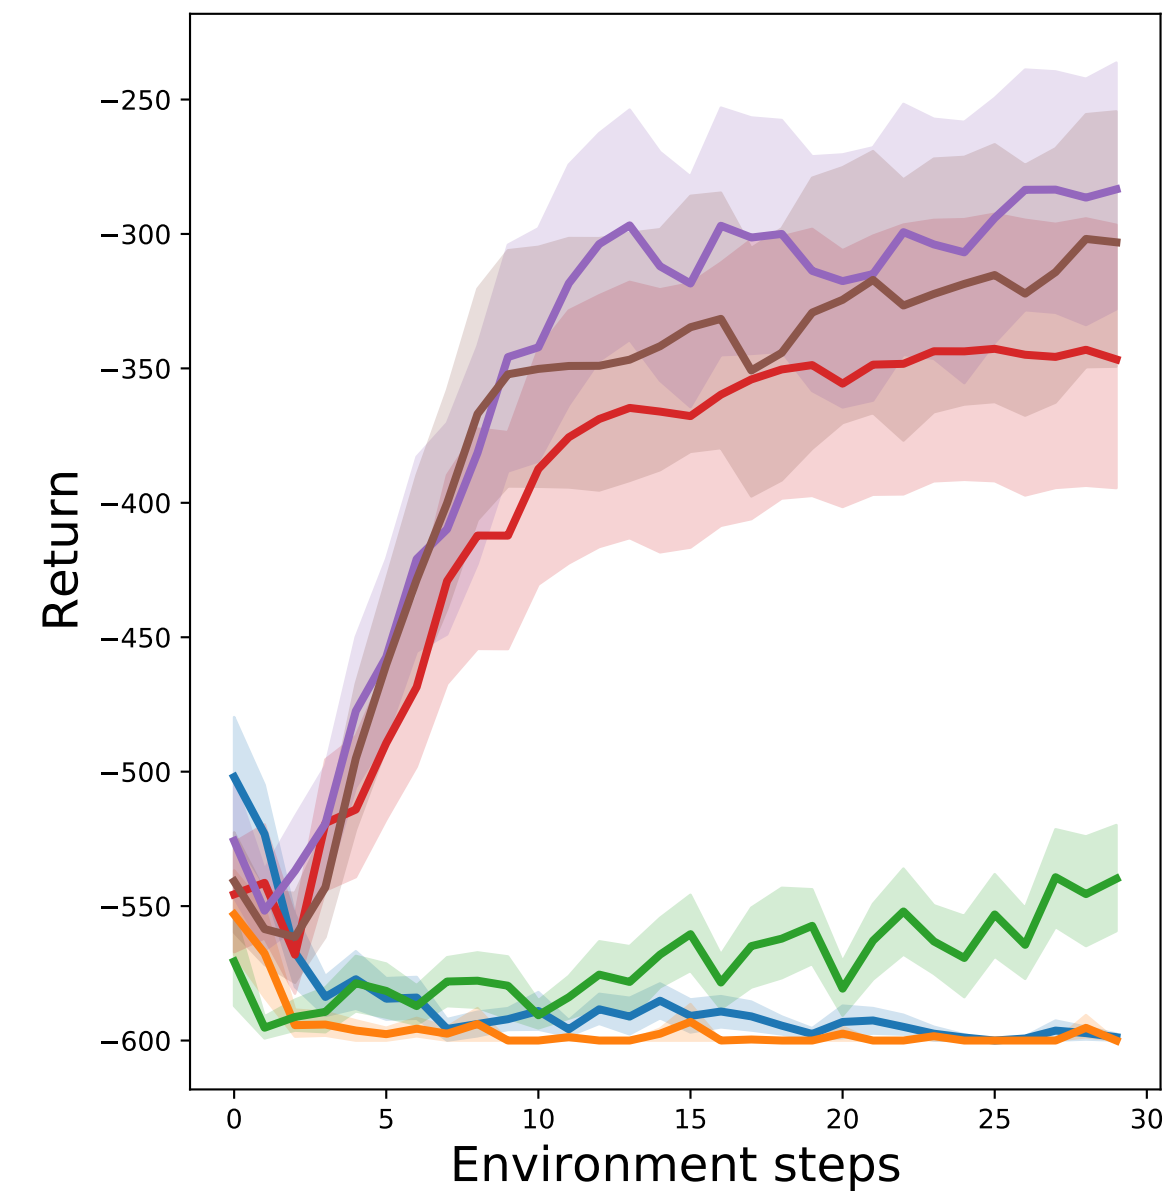

Acrobot

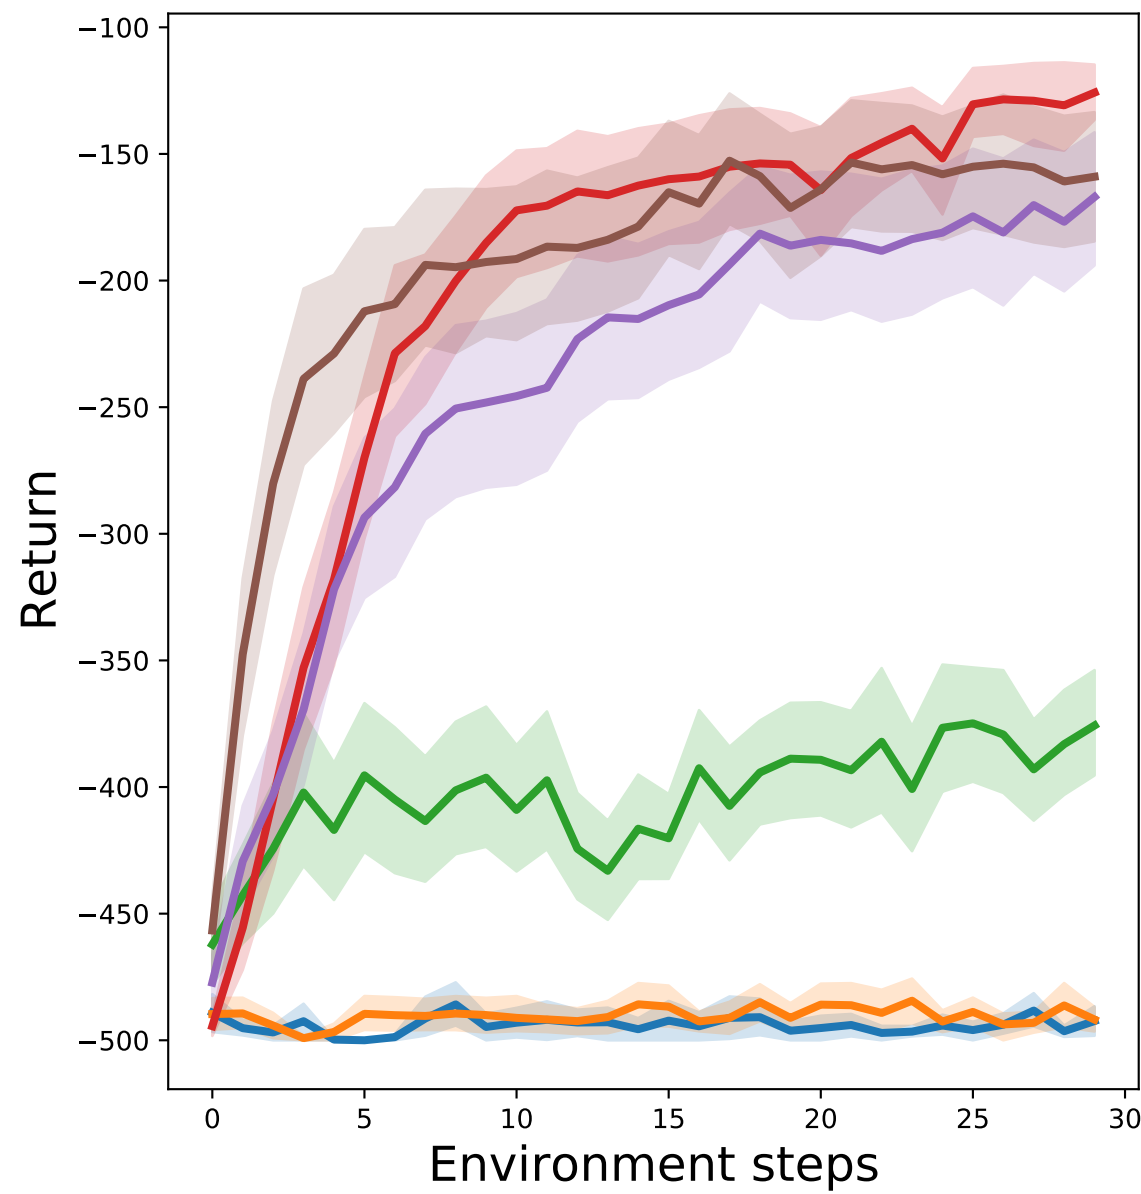

CartPole

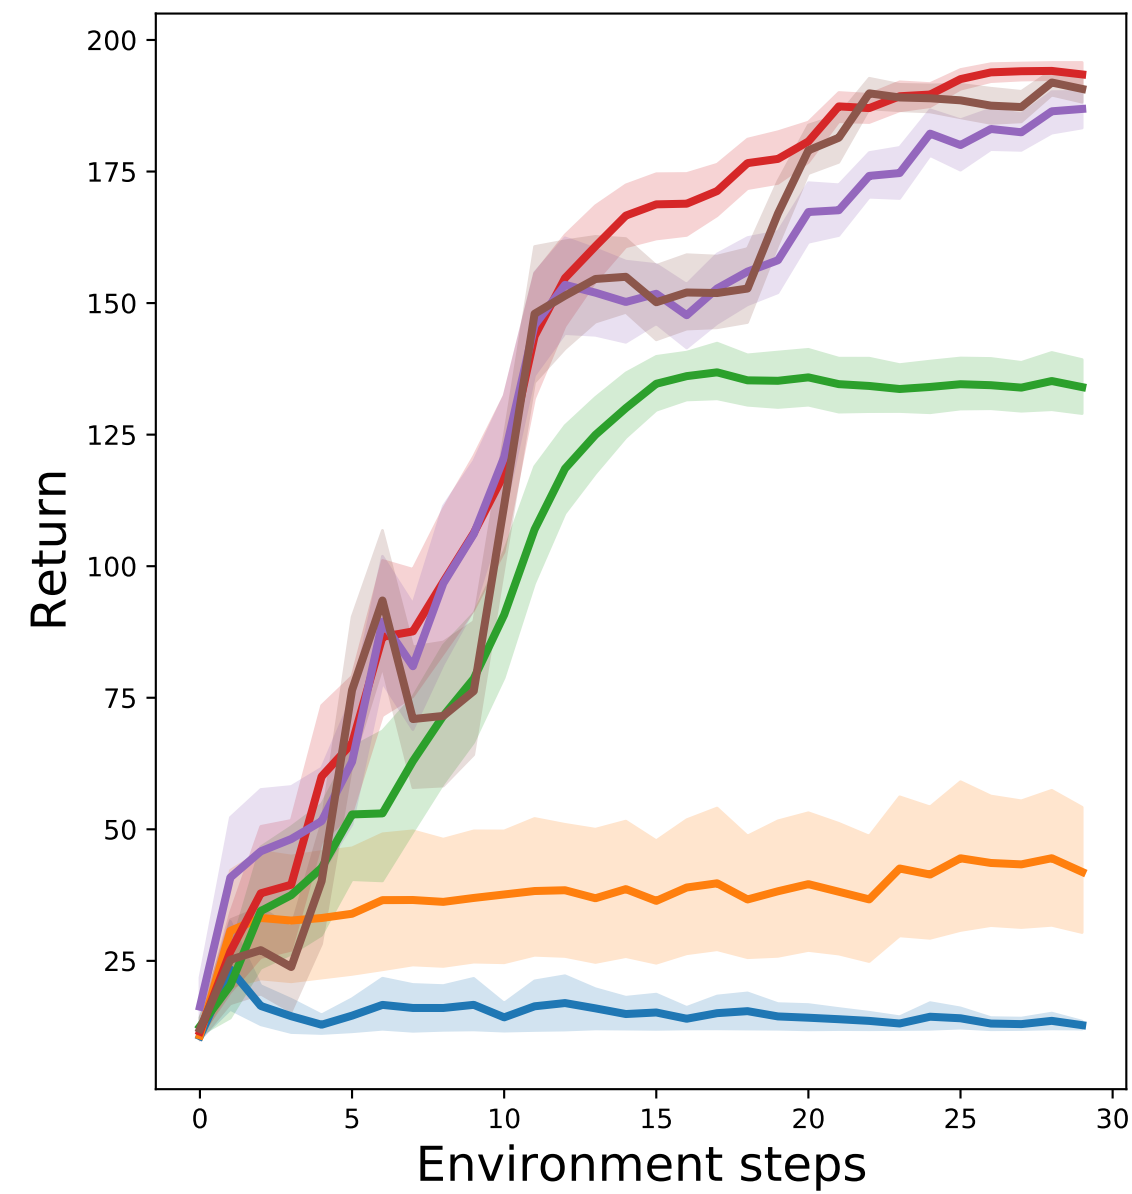

LunarLander

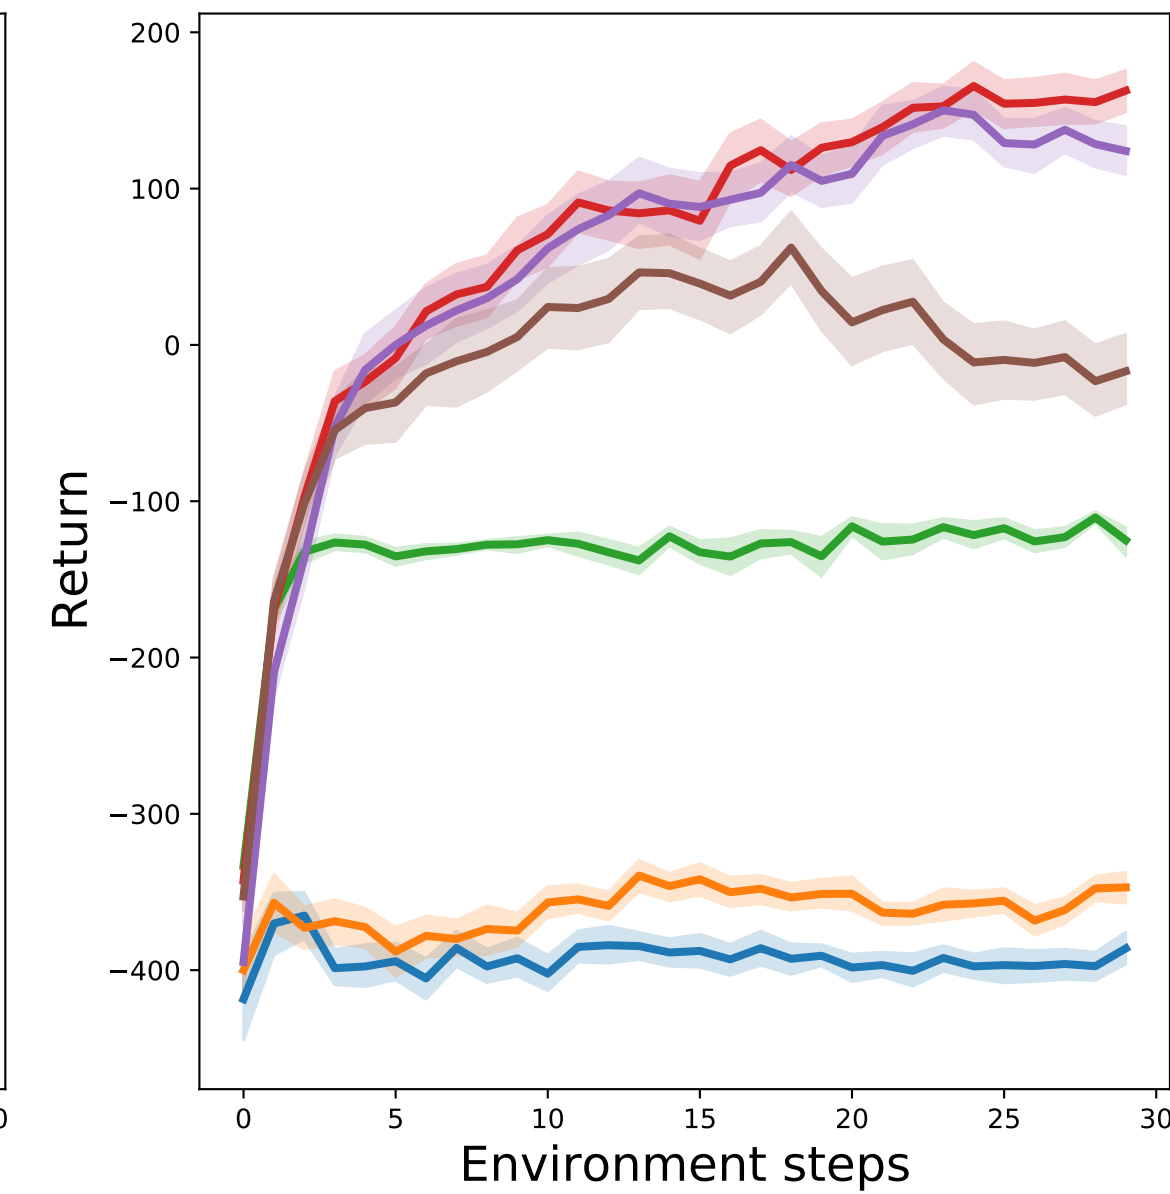

MountainCar

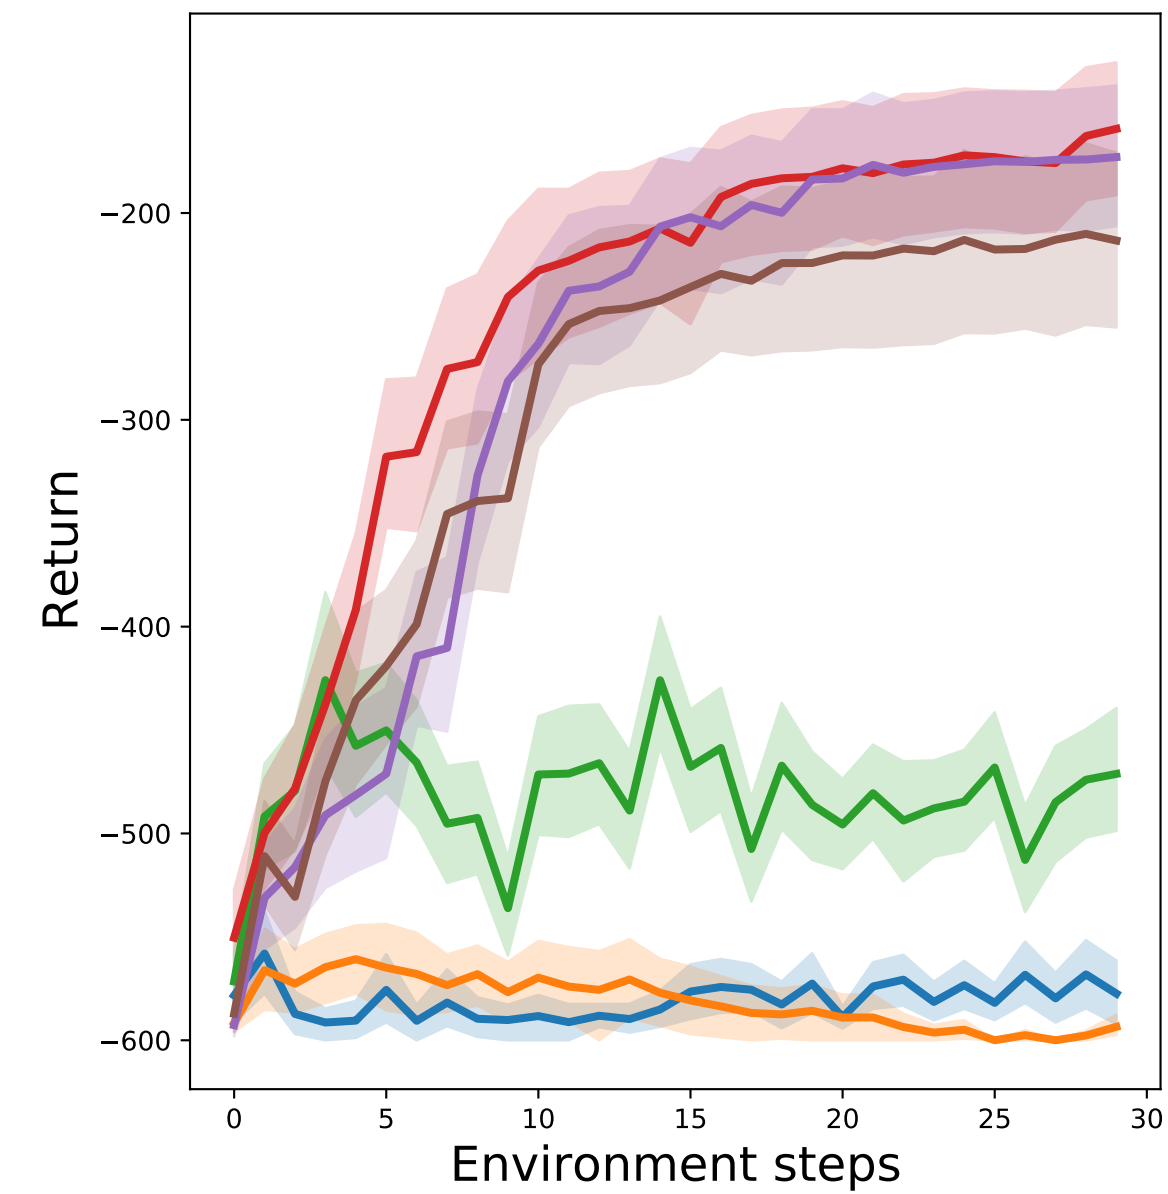

Supplement: supplementary_material [file attachment]

Acrobot

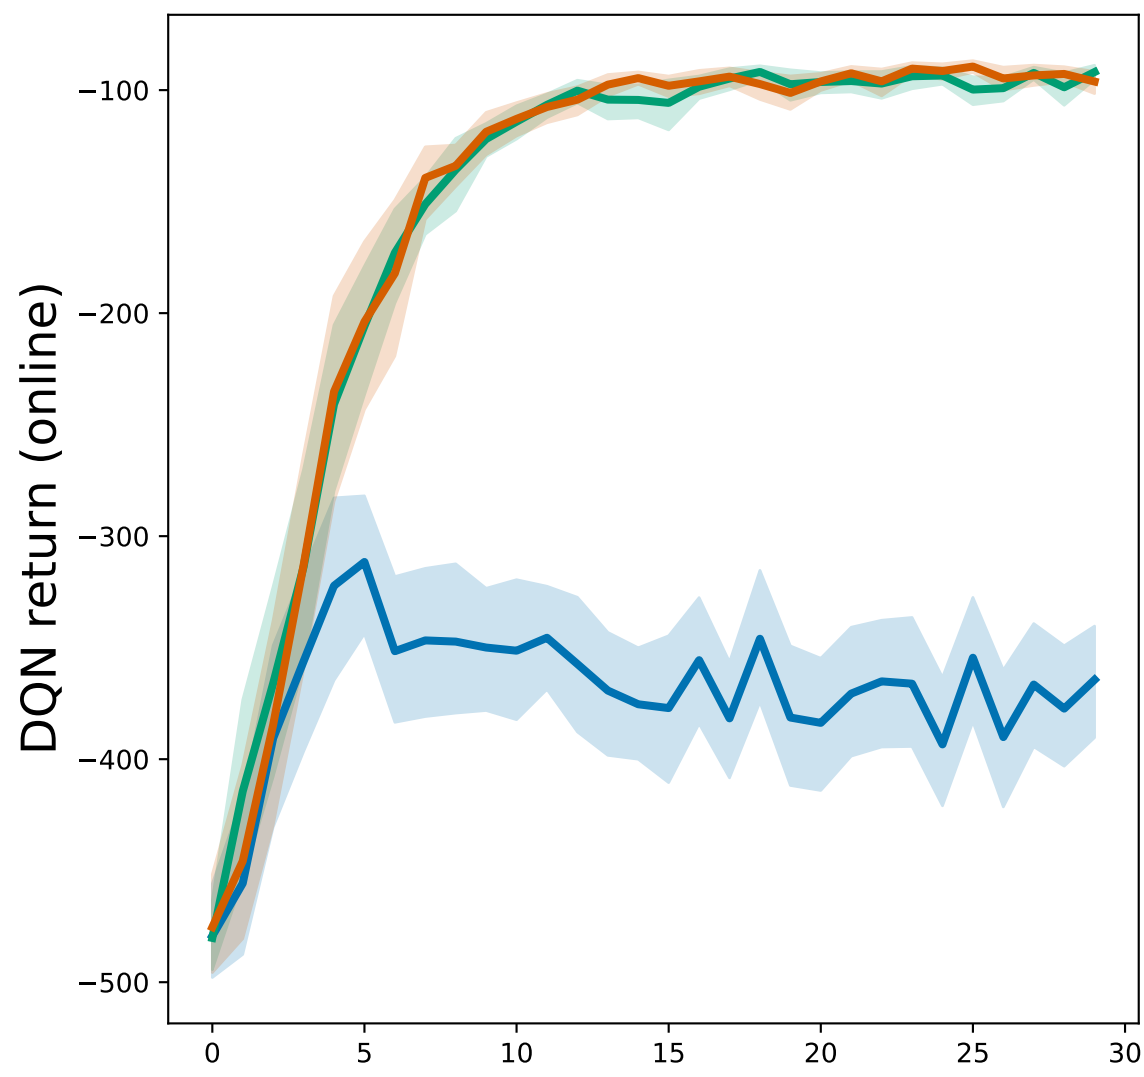

CartPole

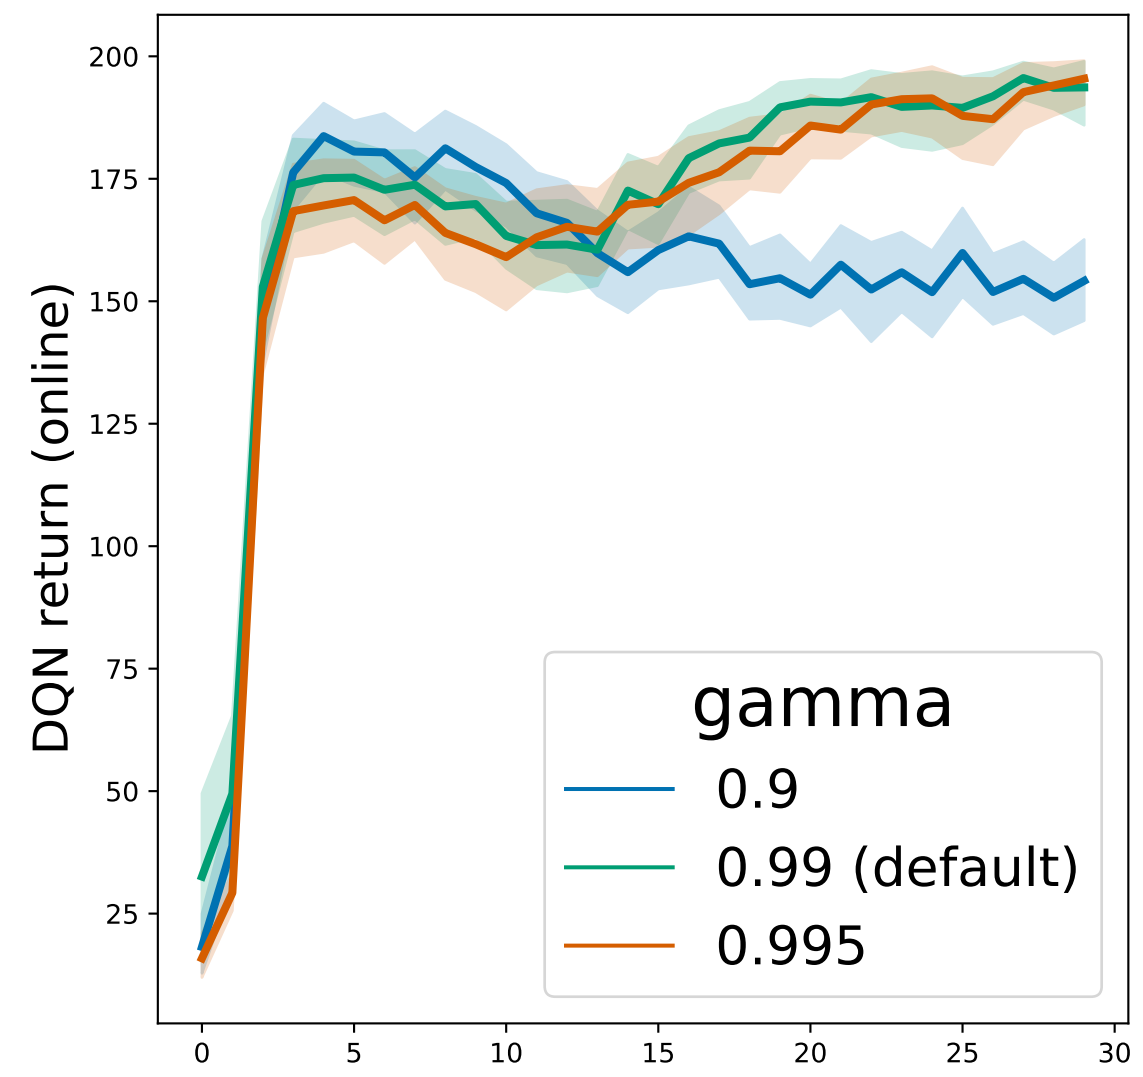

LunarLander

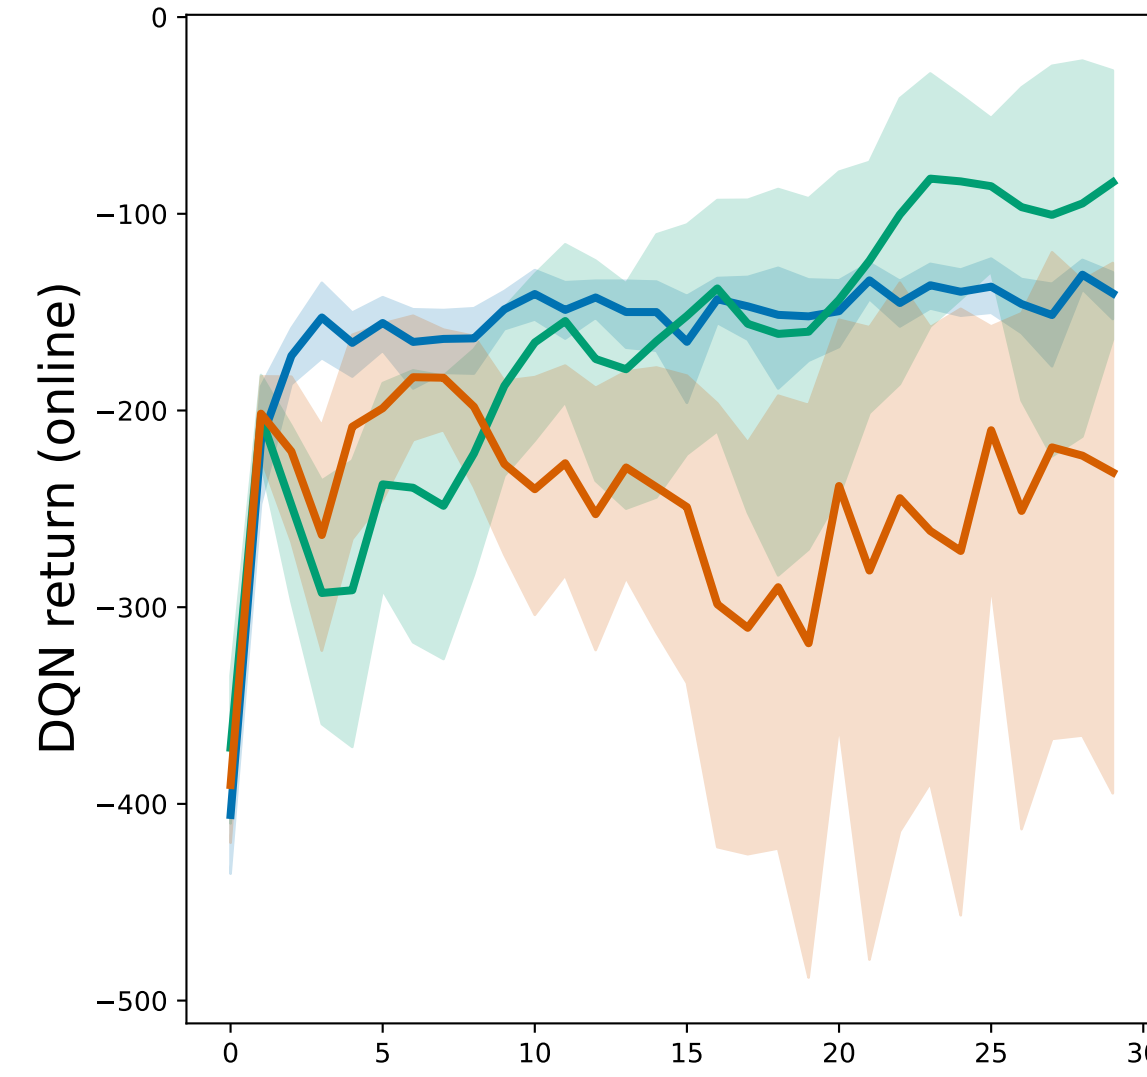

MountainCar

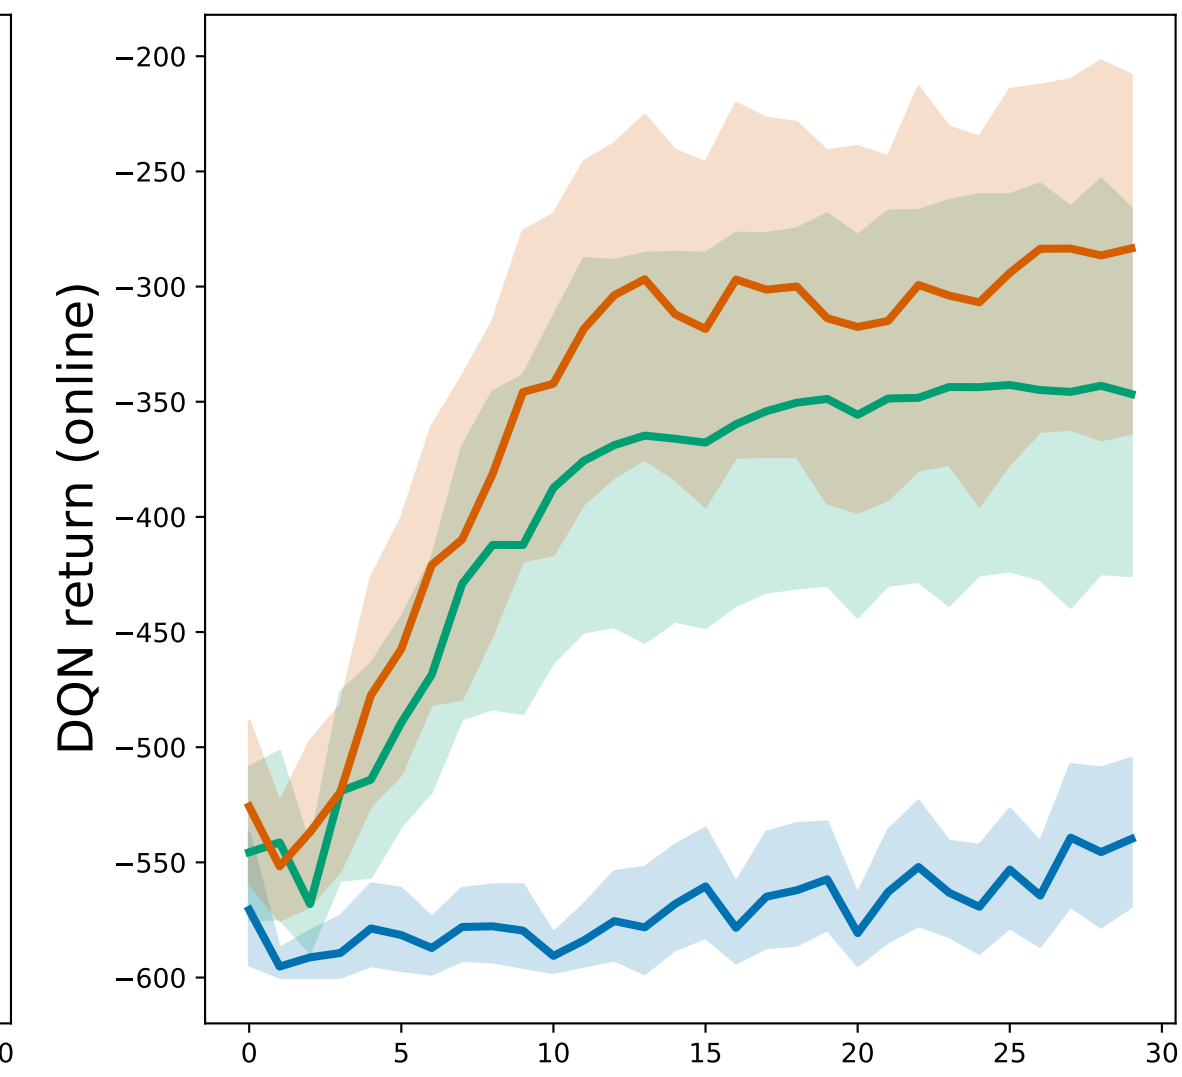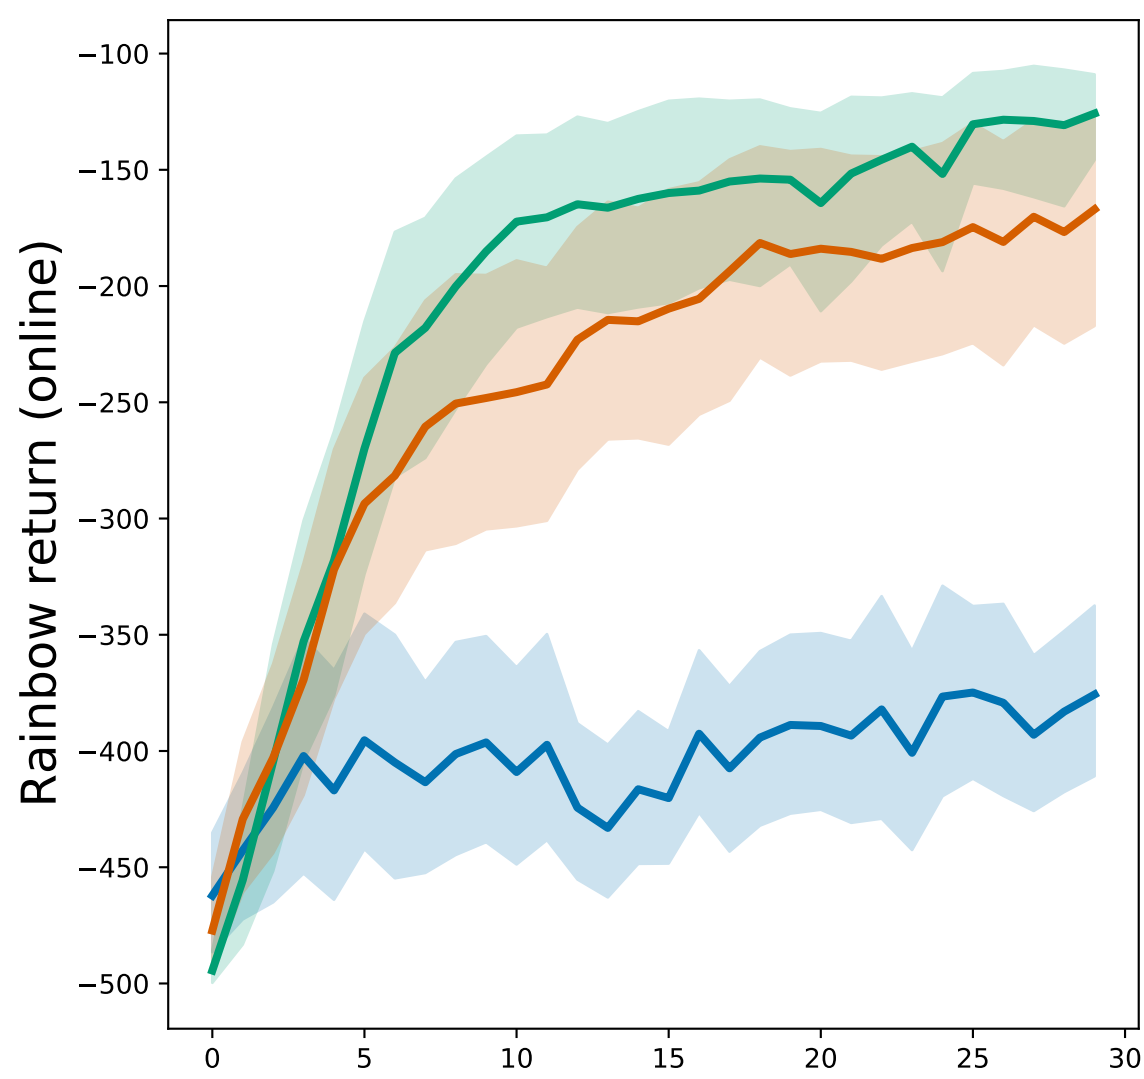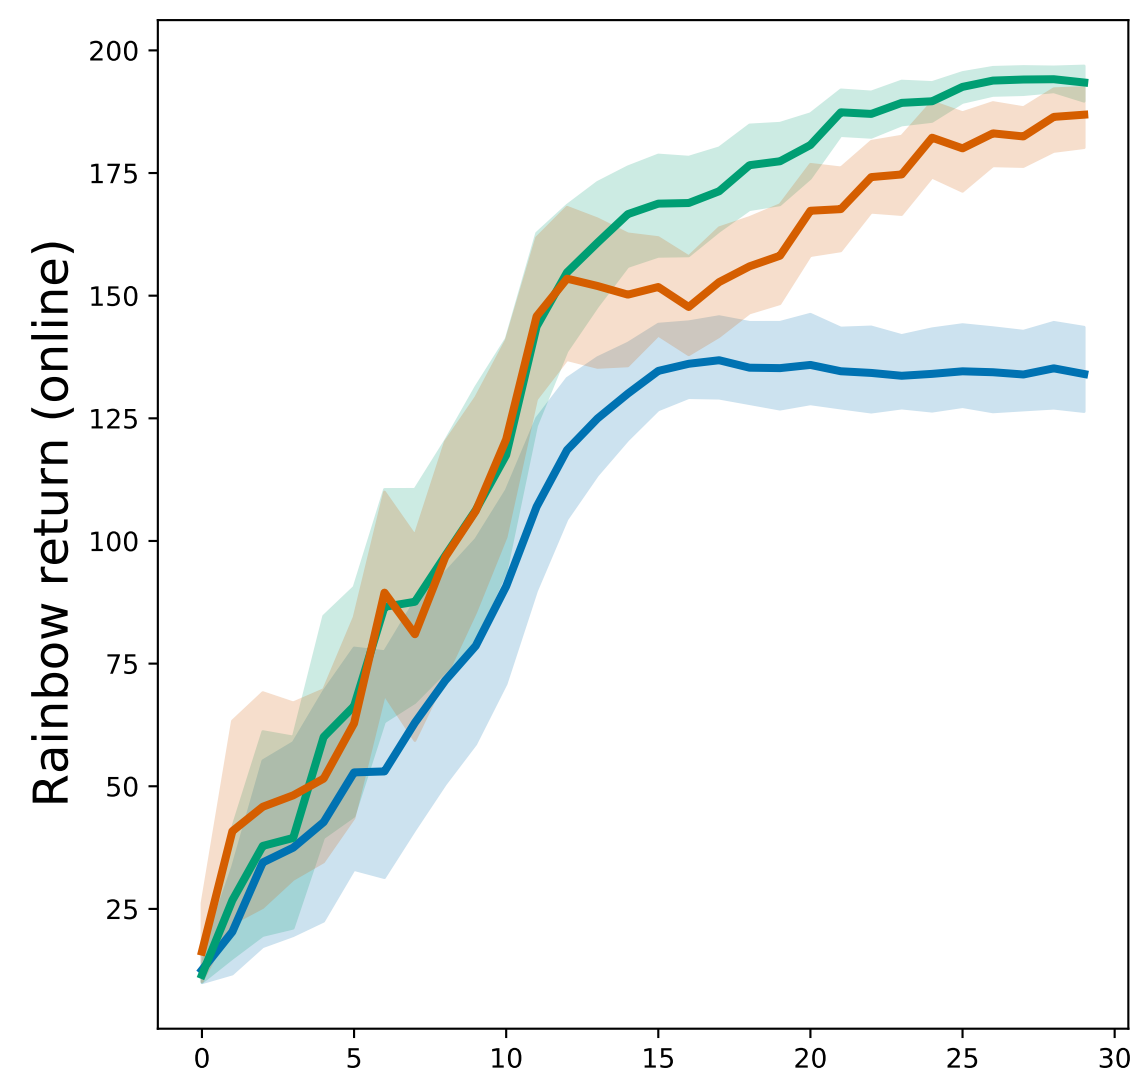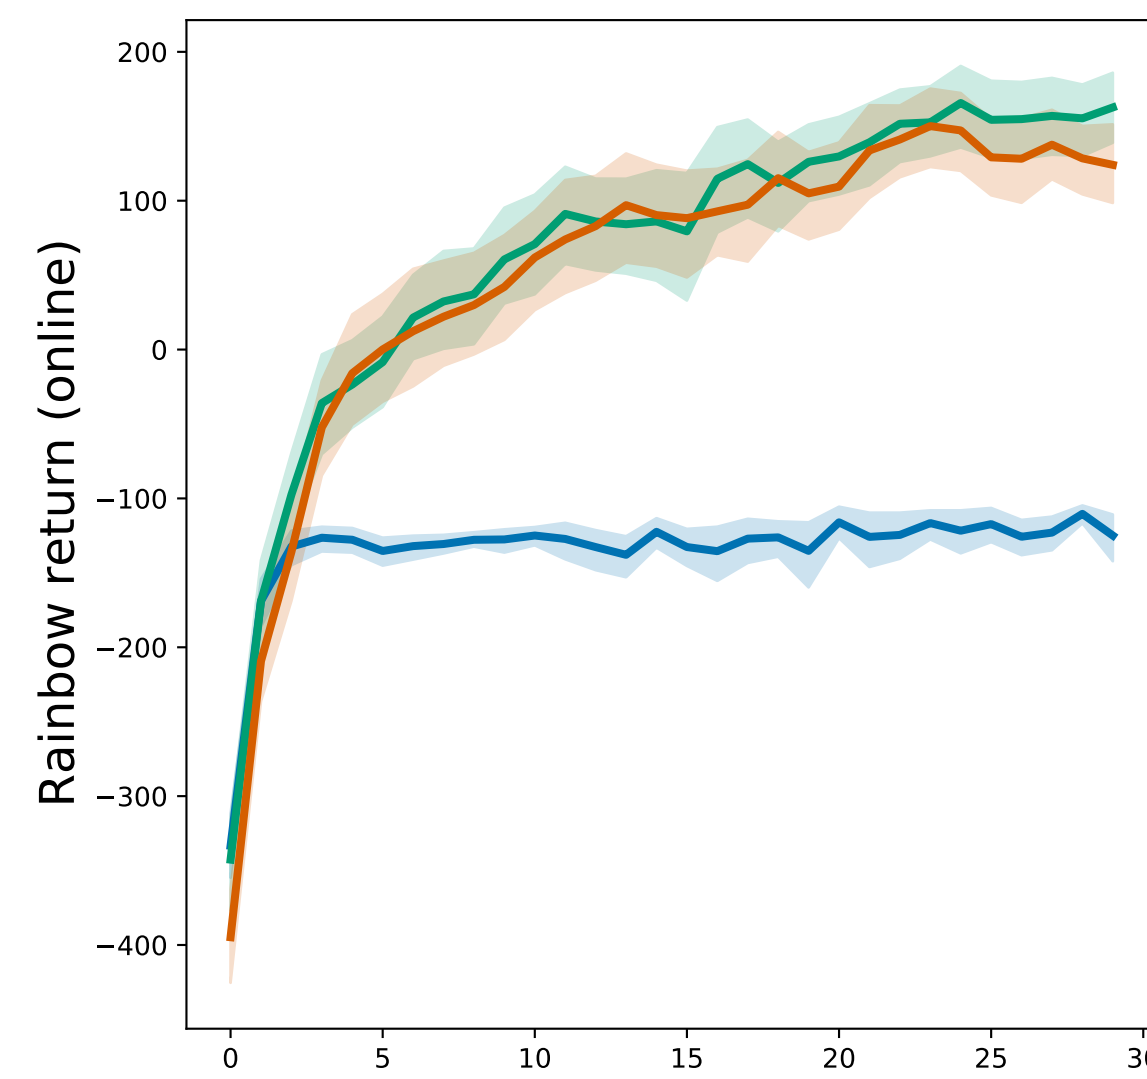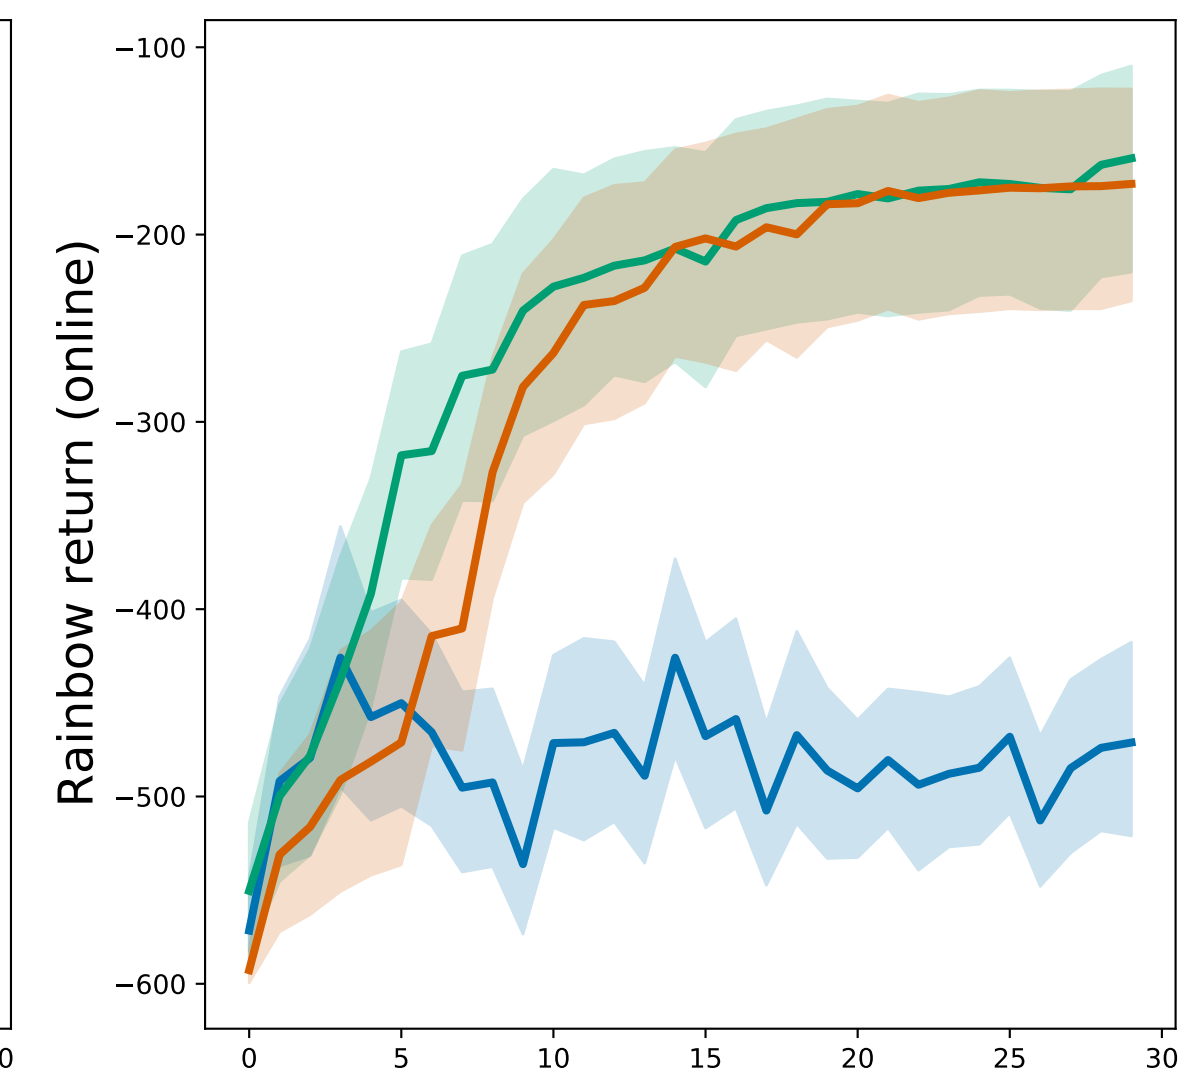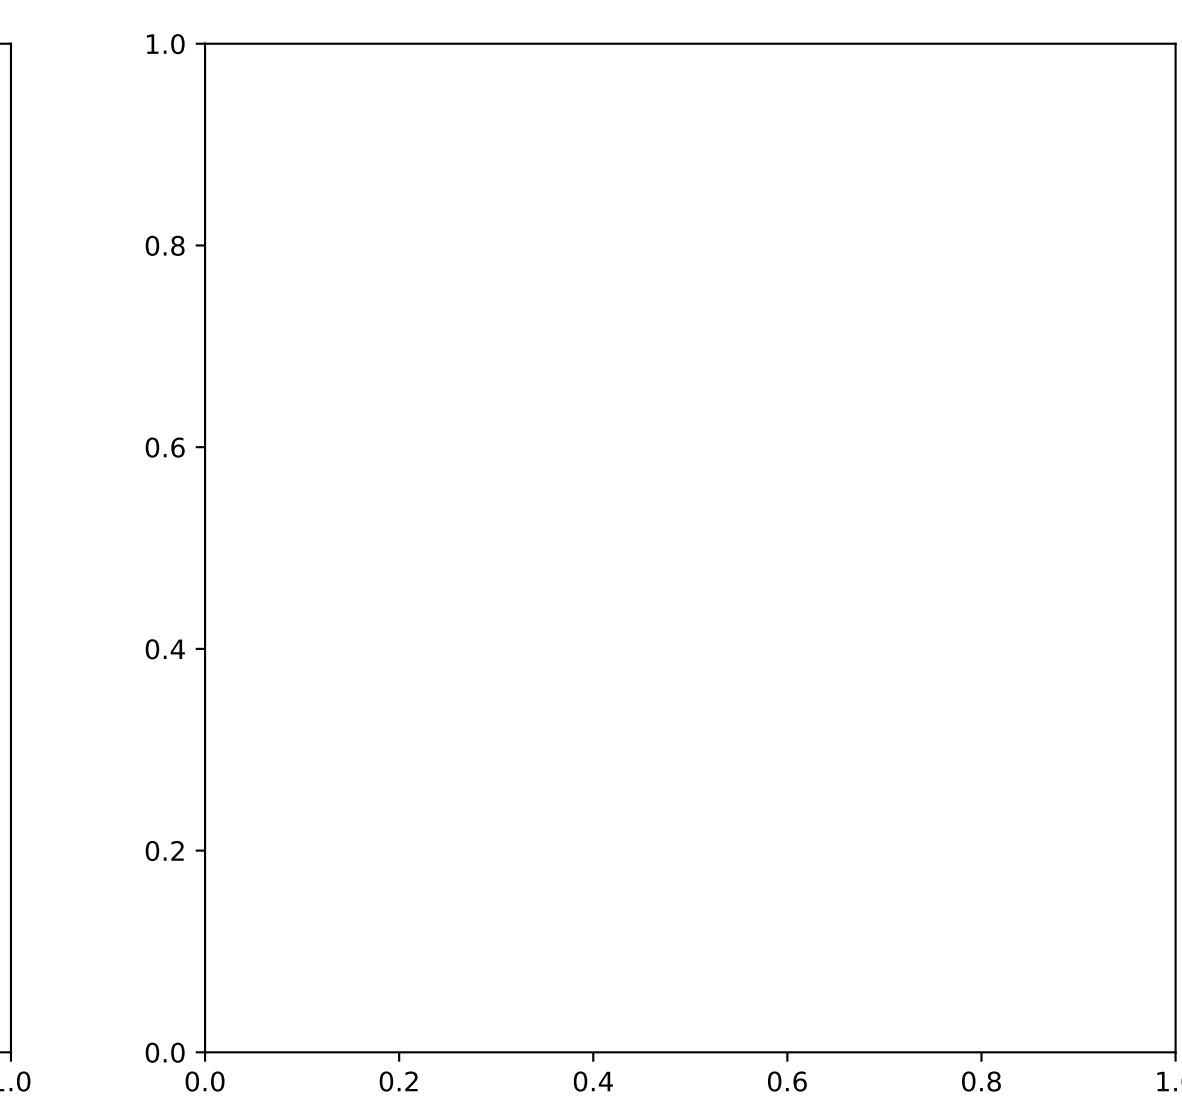

Supplement: supplementary_material [file attachment]

Acrobot

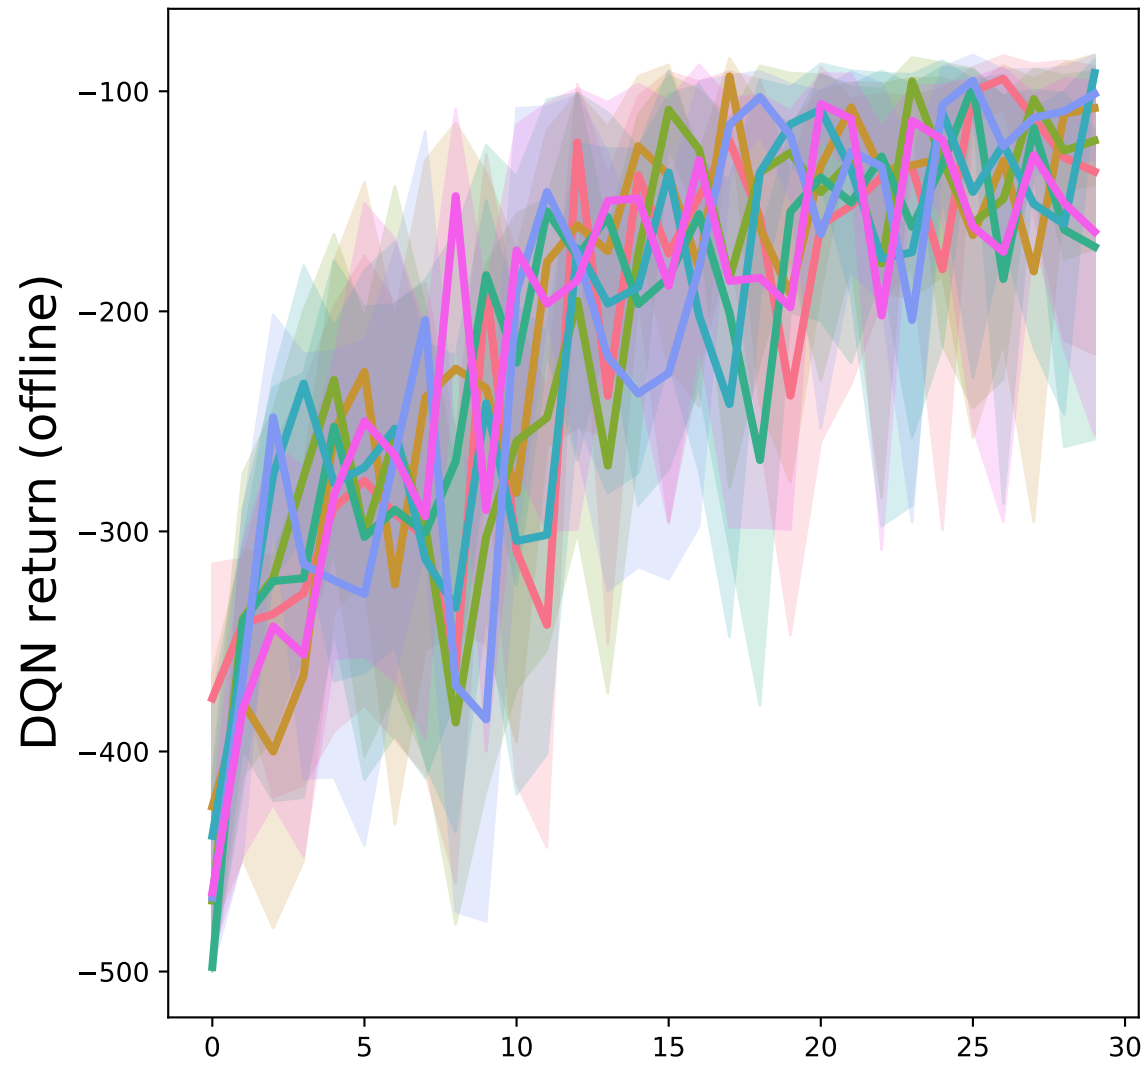

CartPole

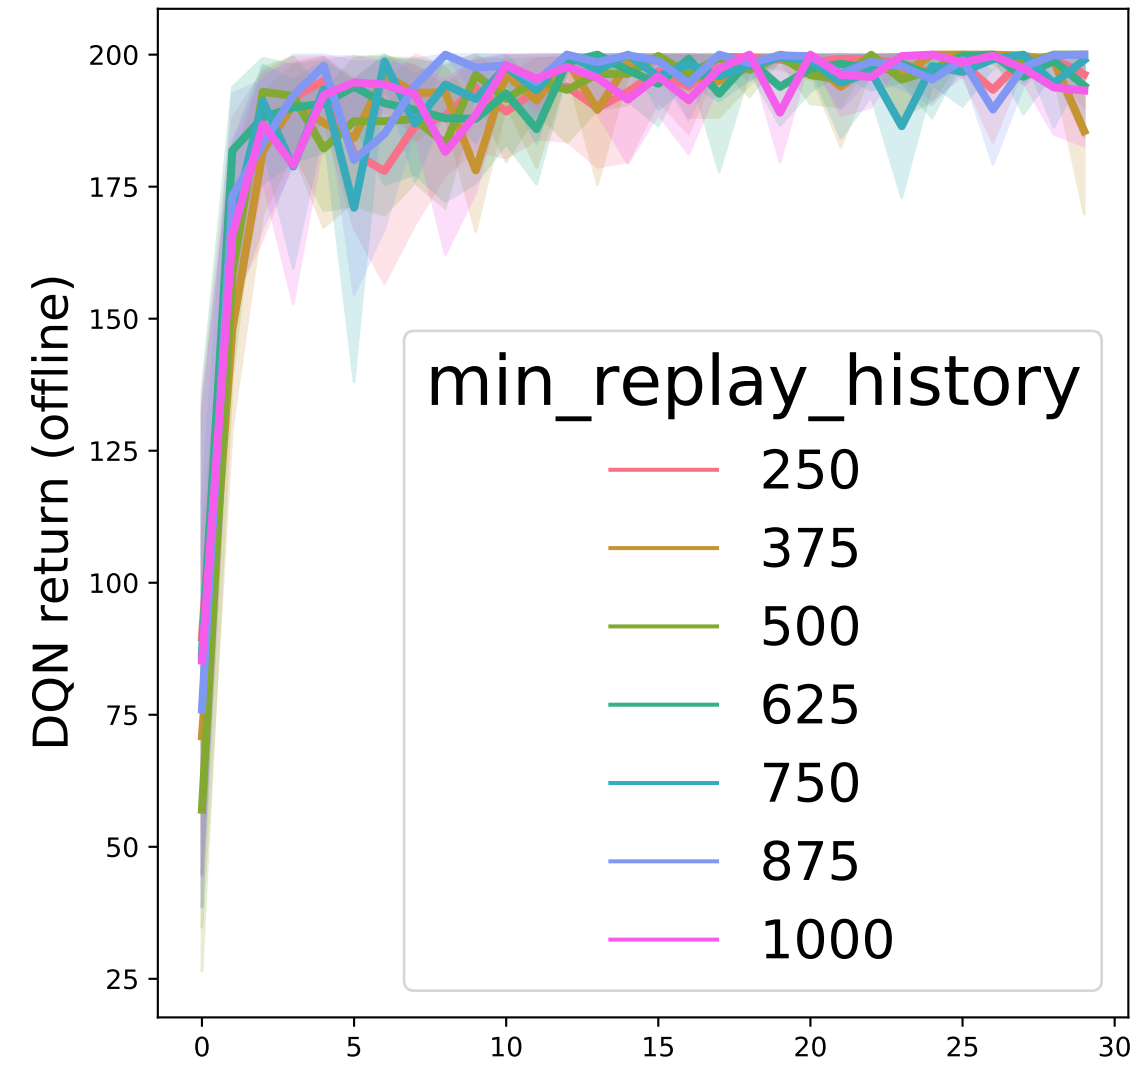

LunarLander

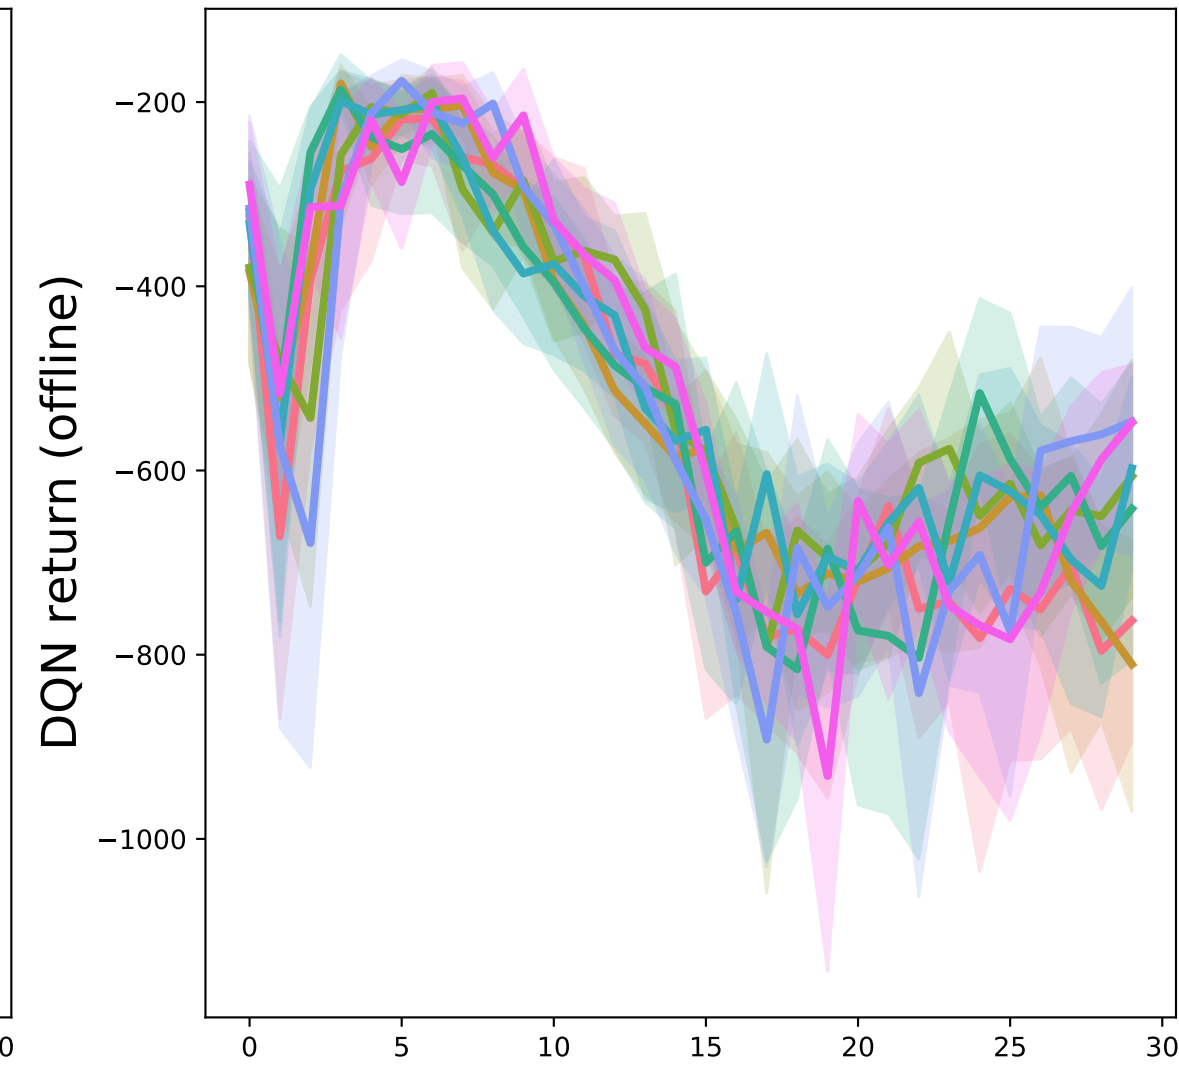

MountainCar

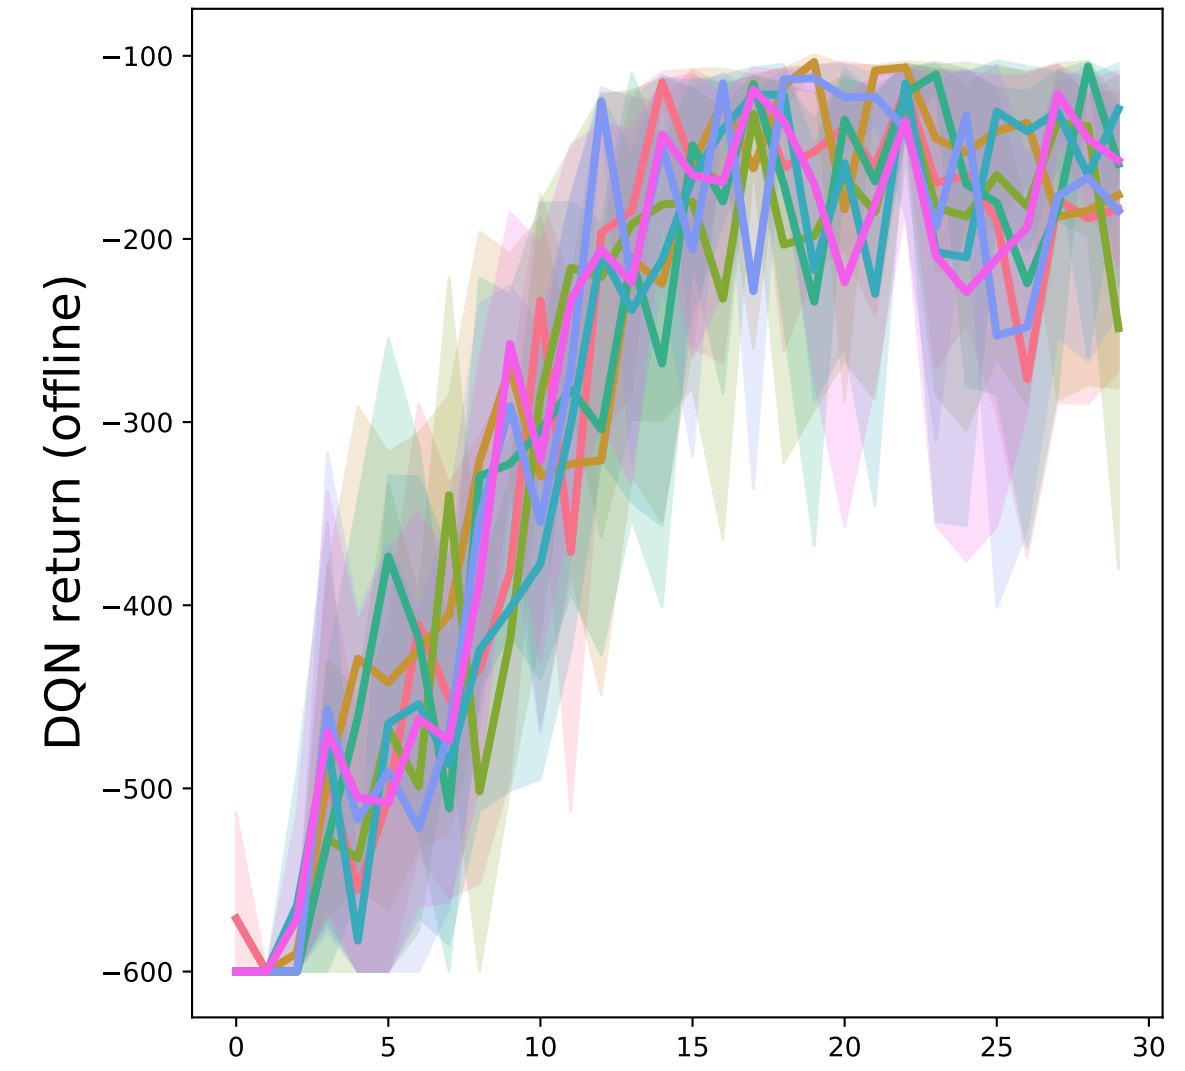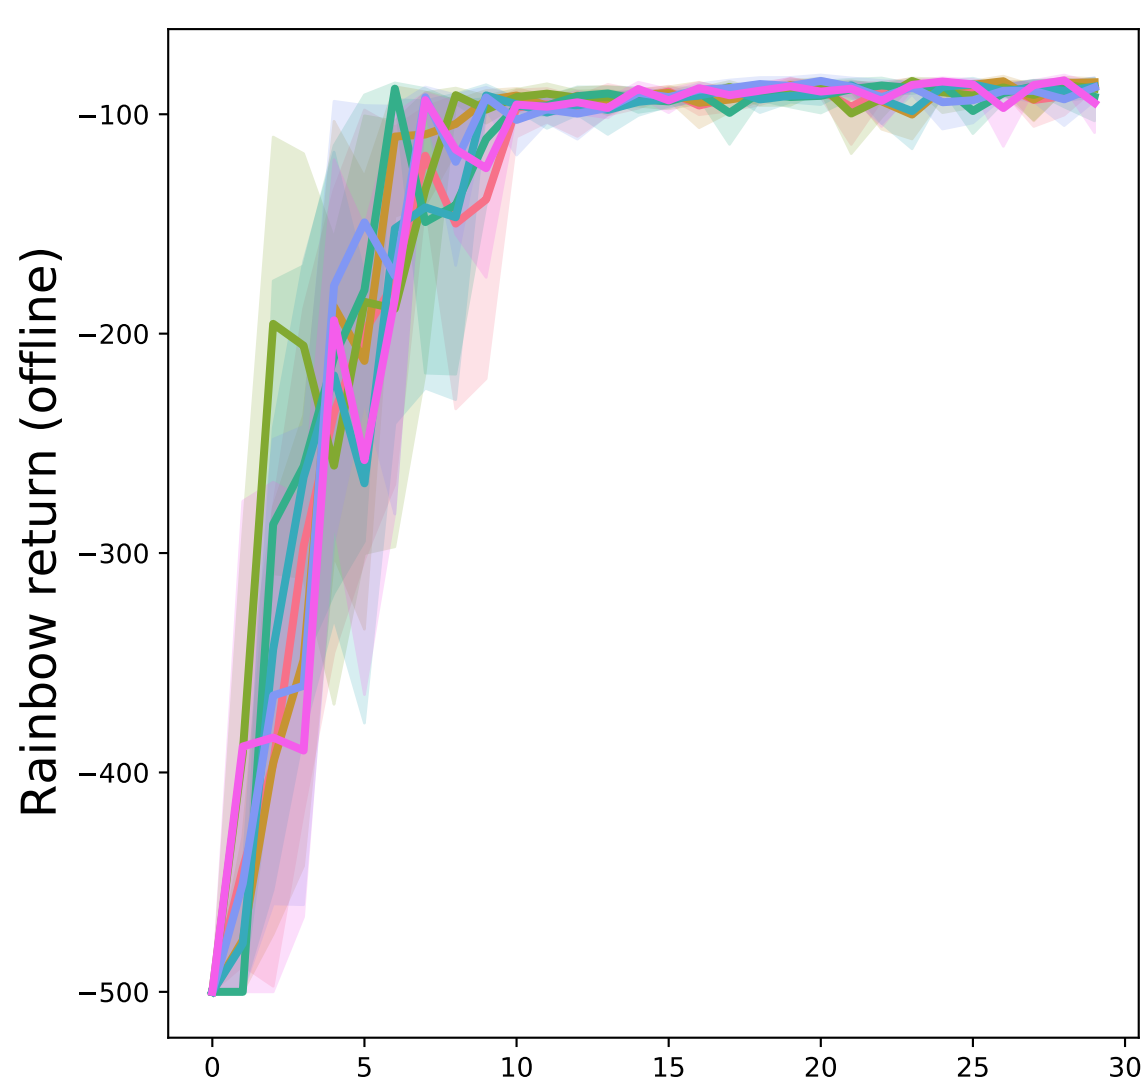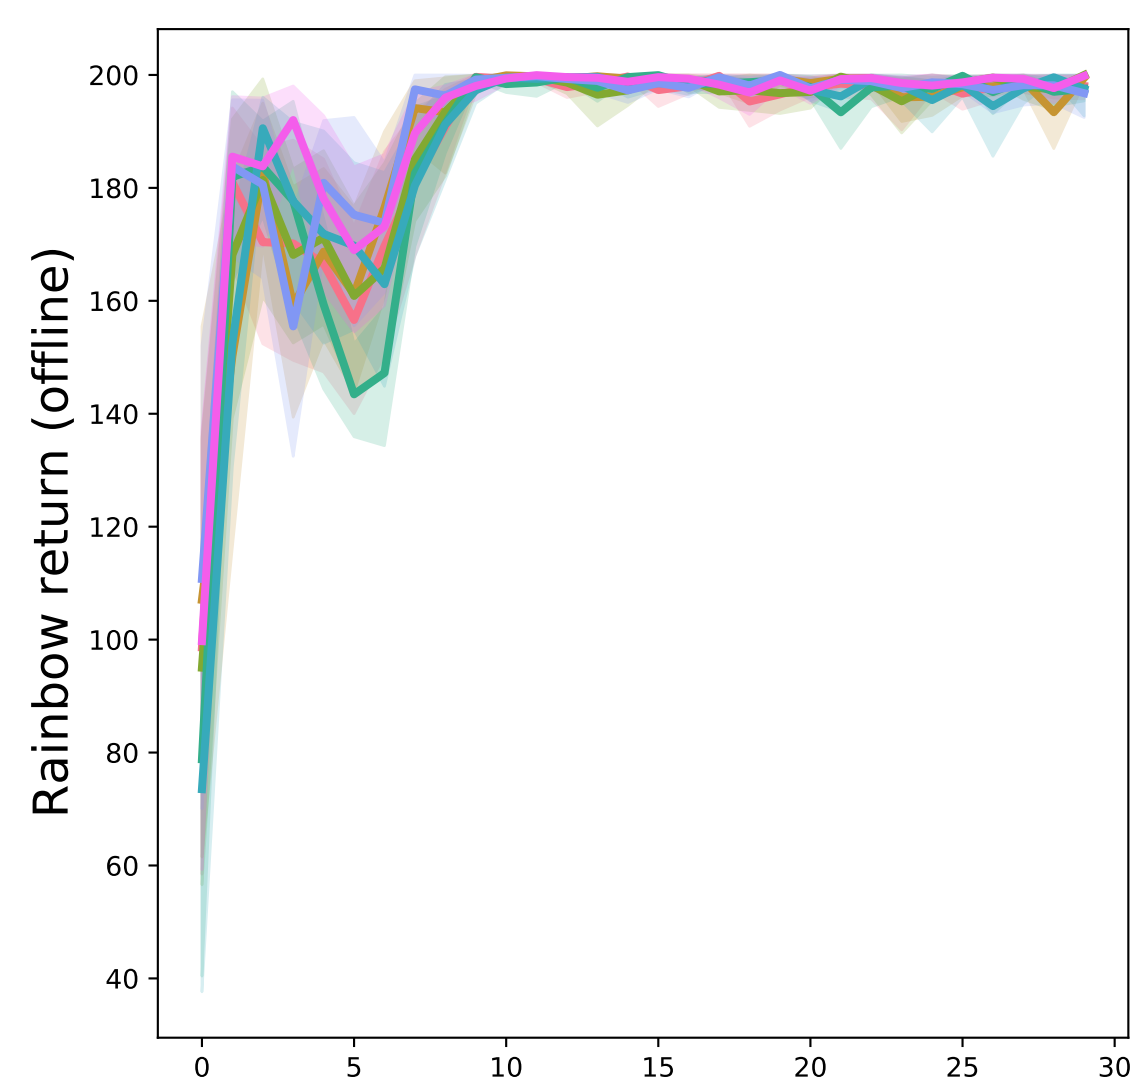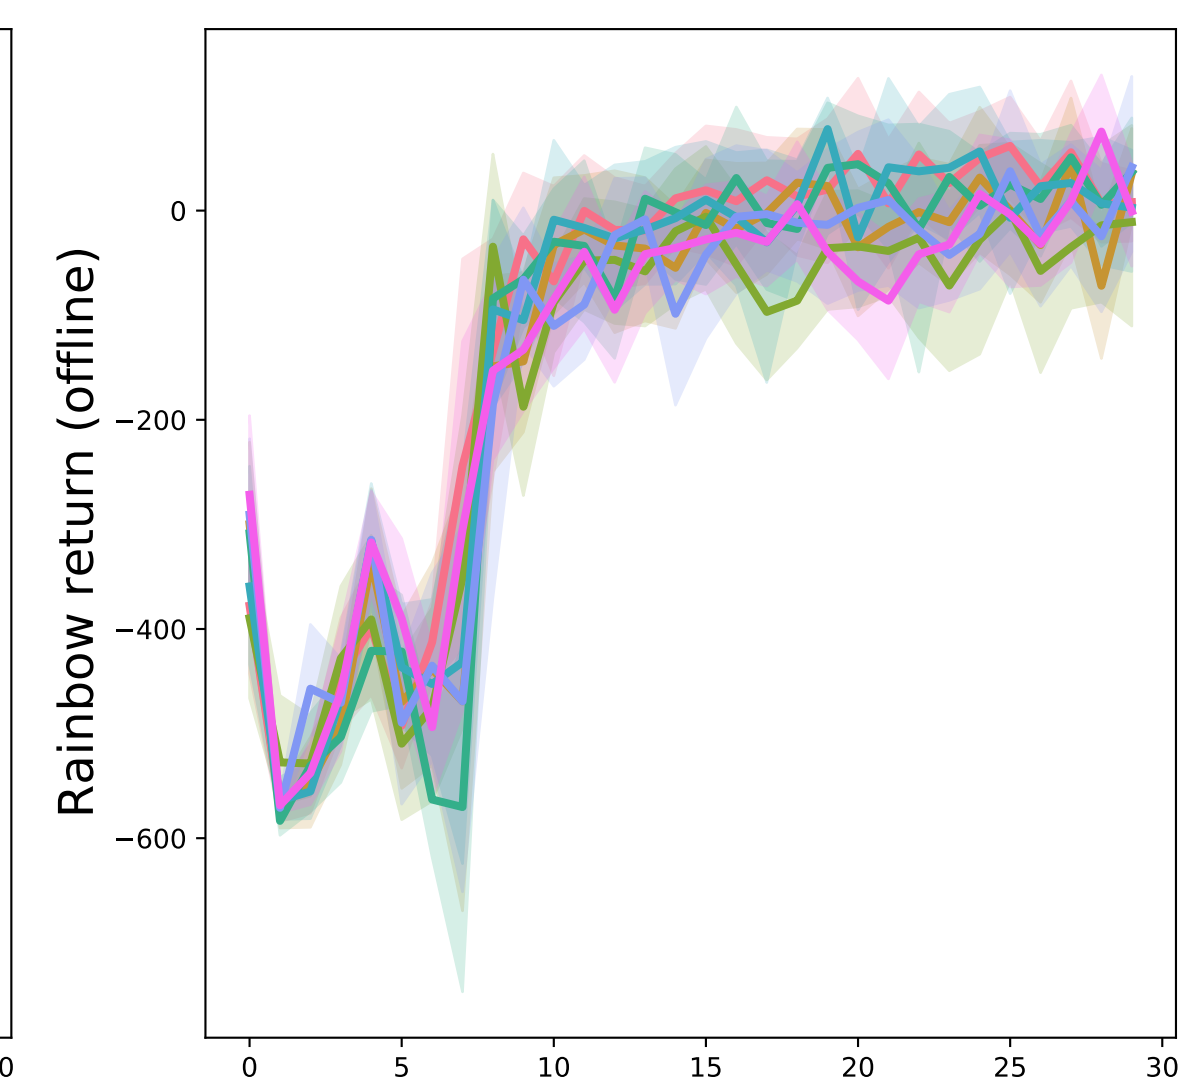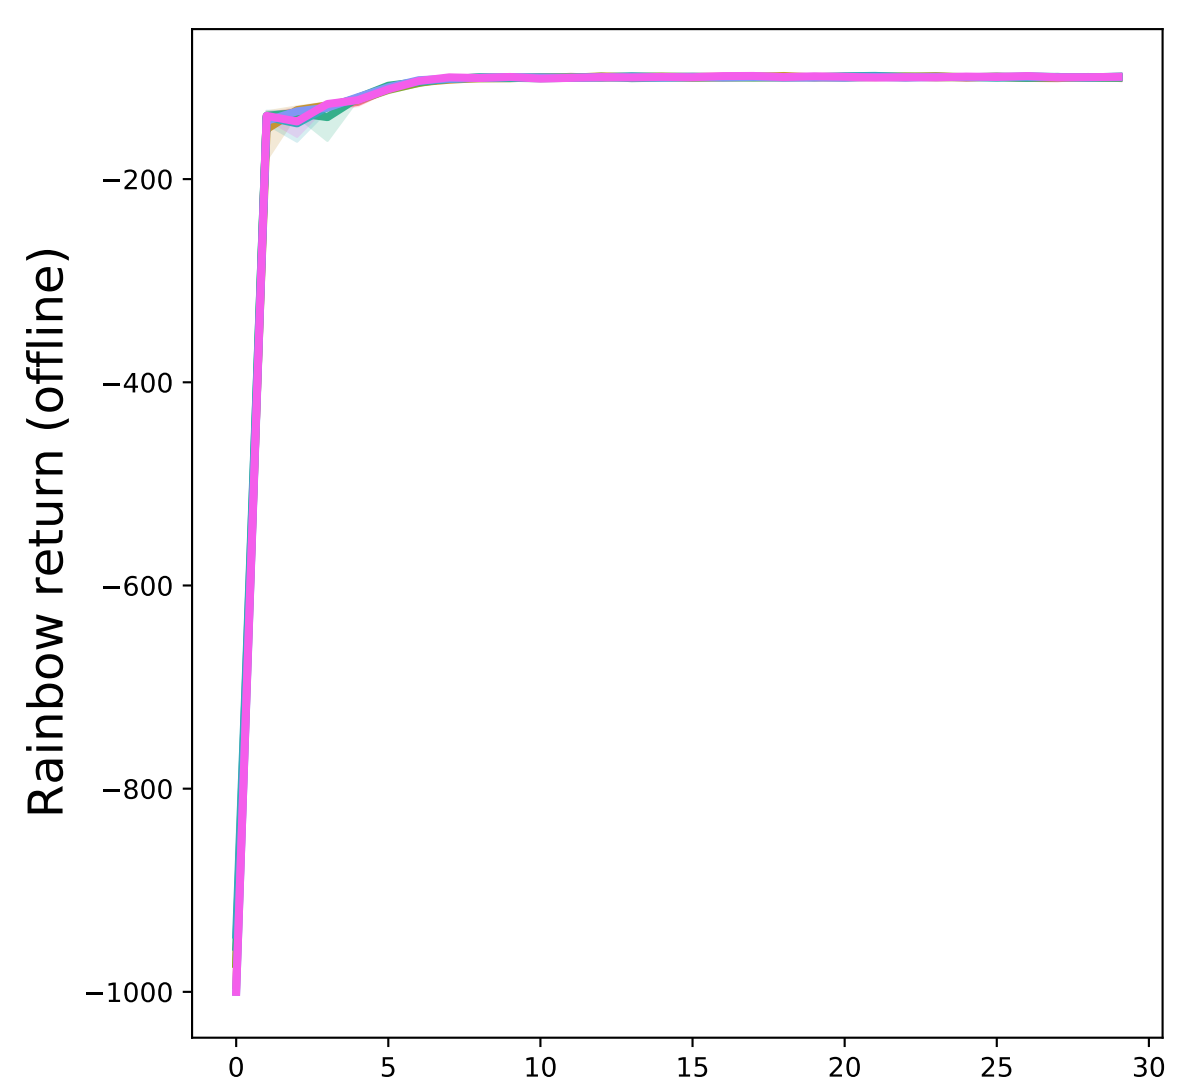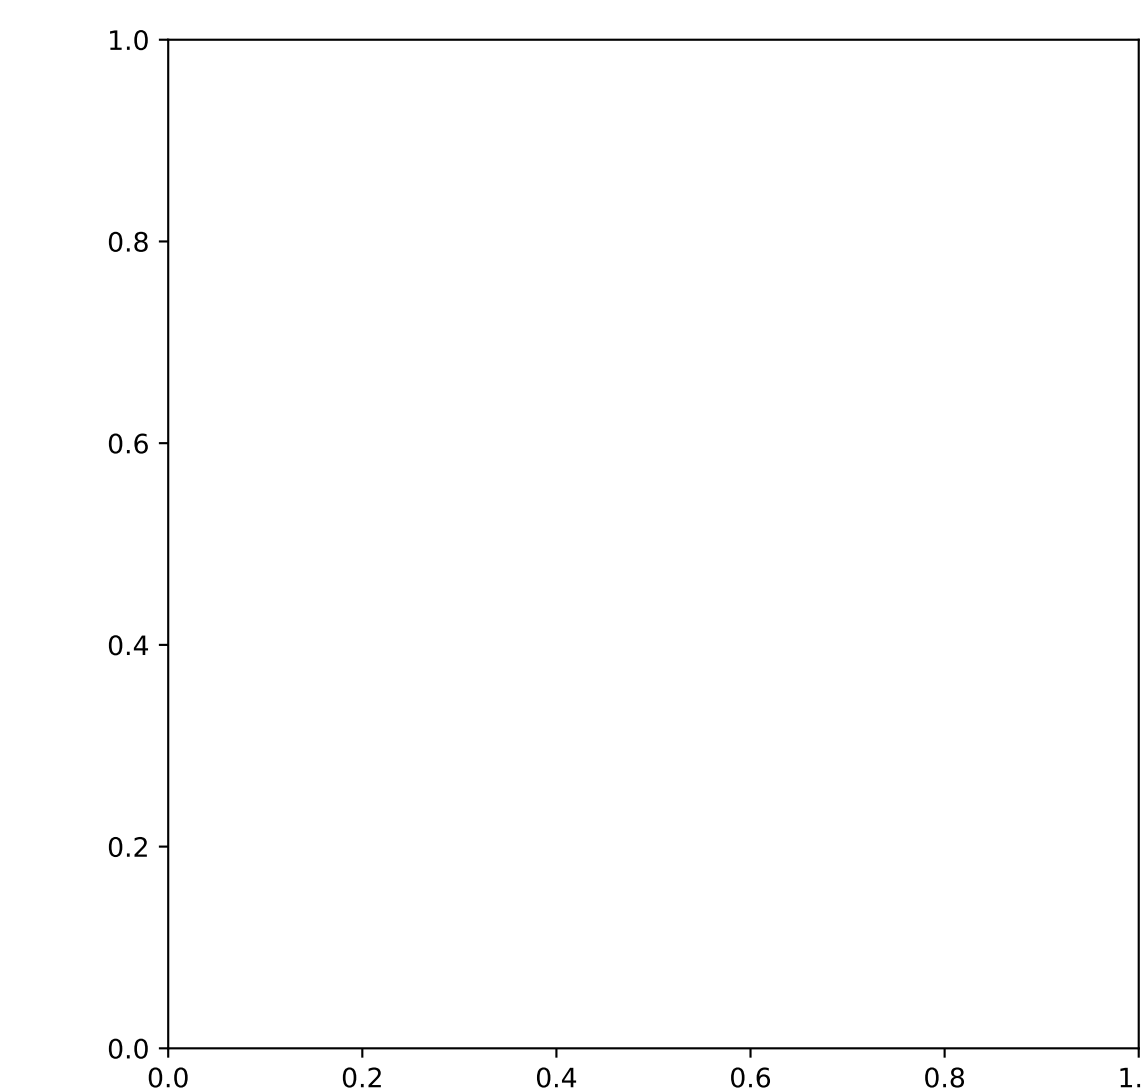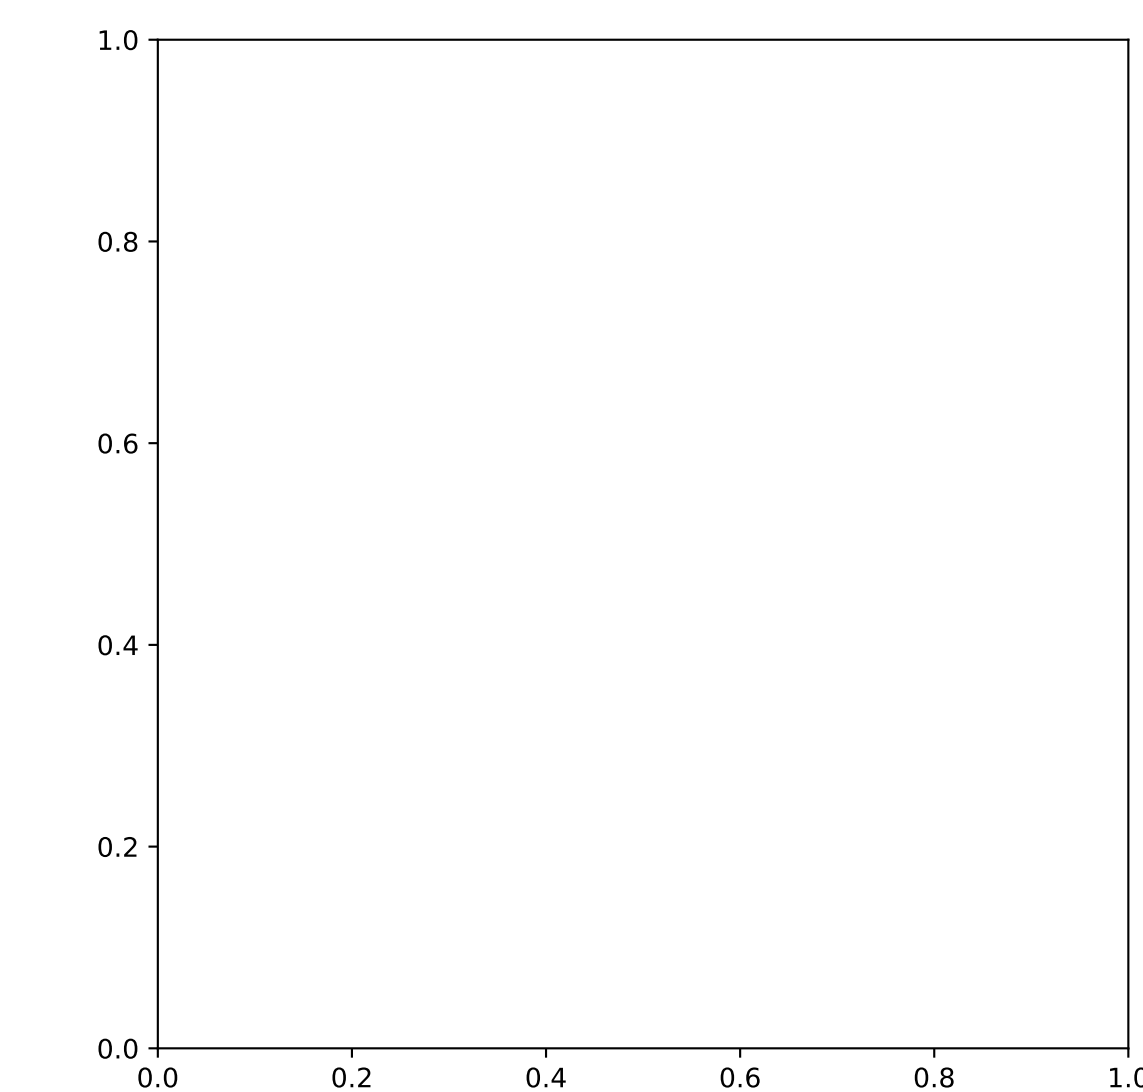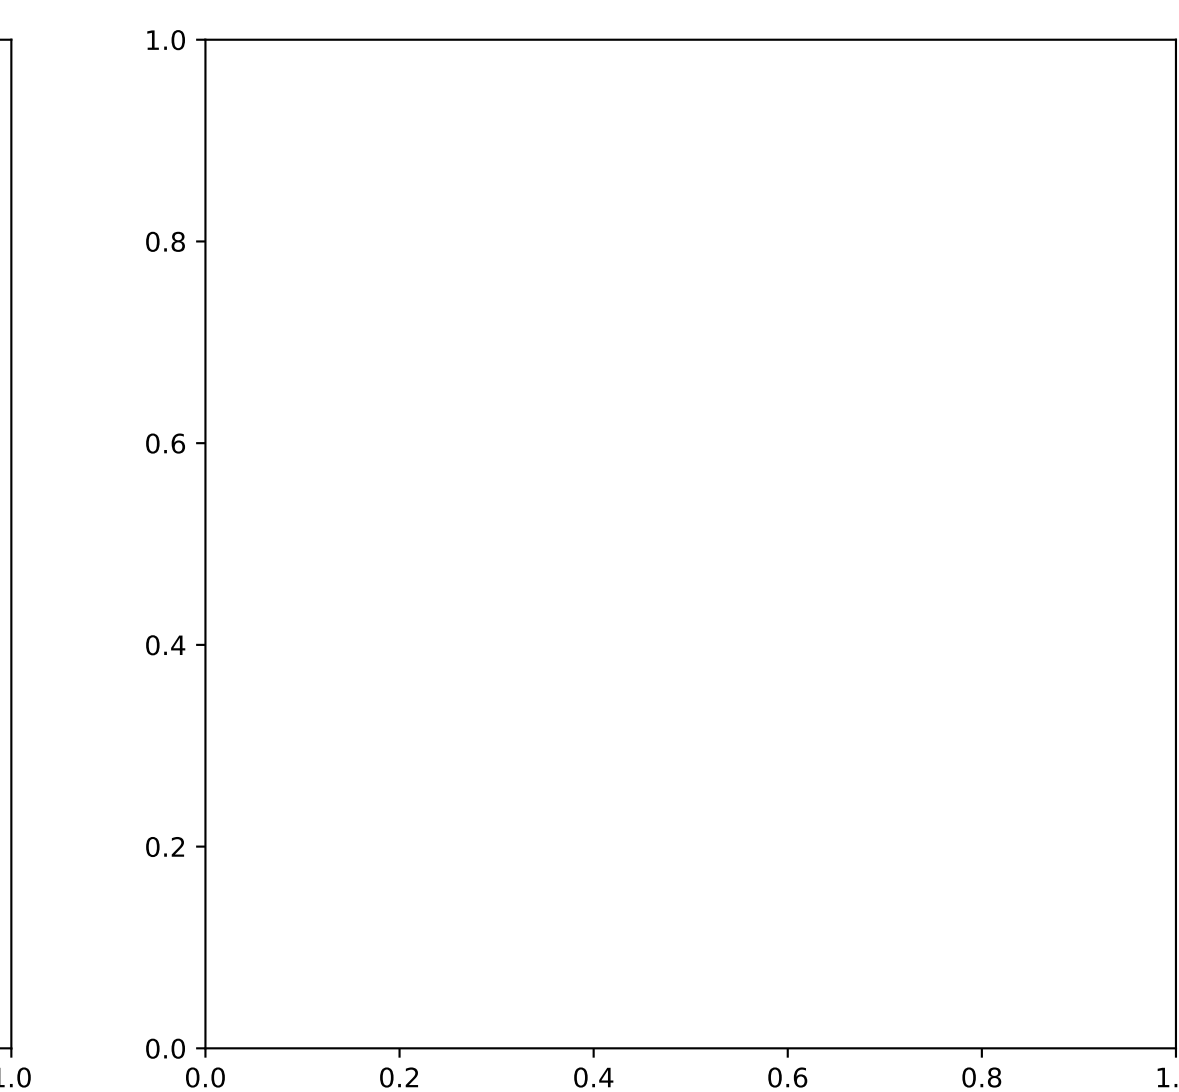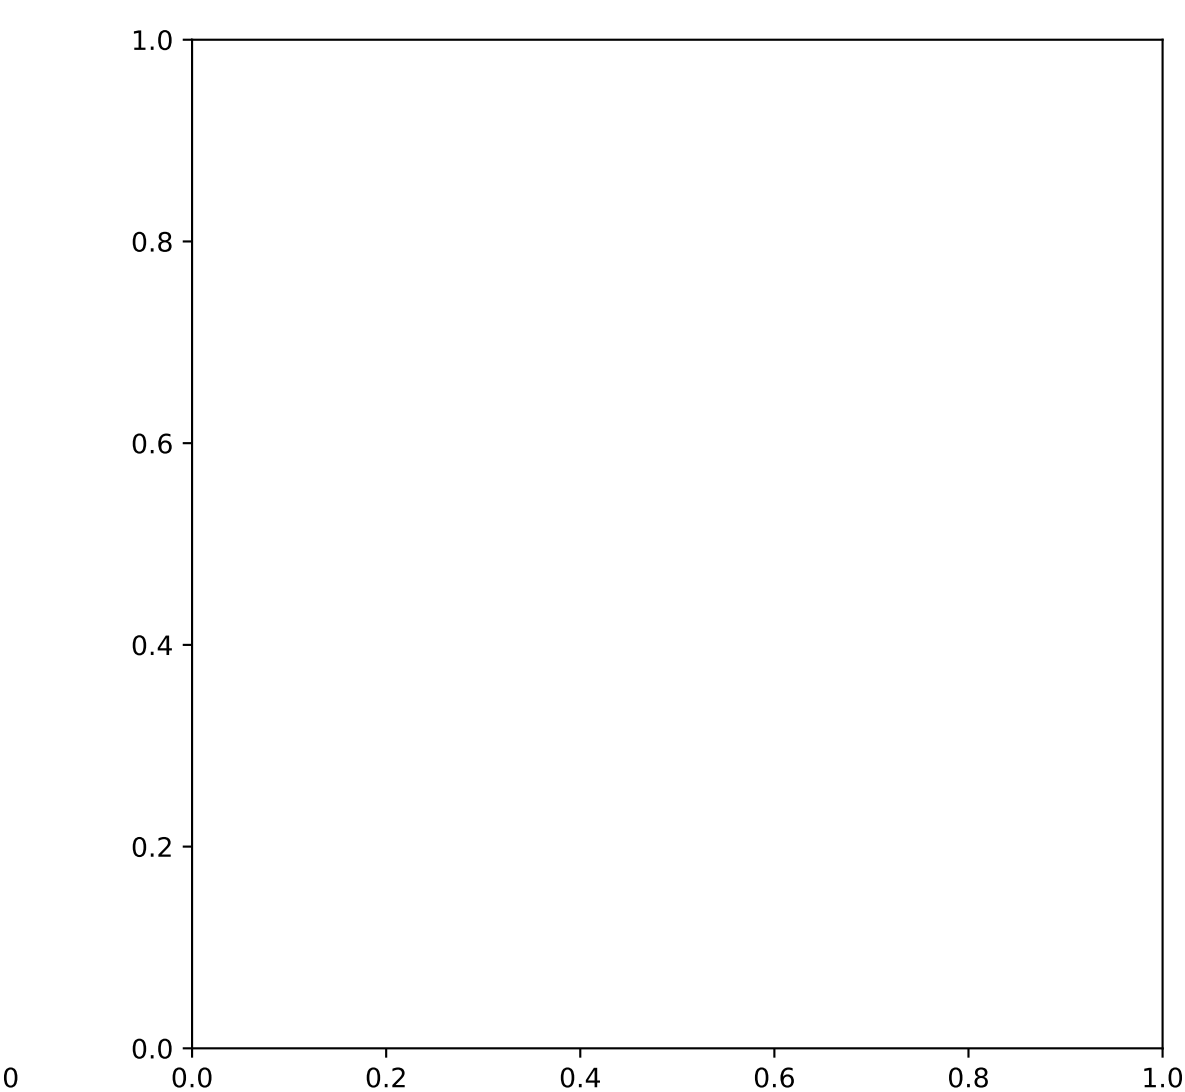

Supplement: supplementary_material [file attachment]

Acrobot

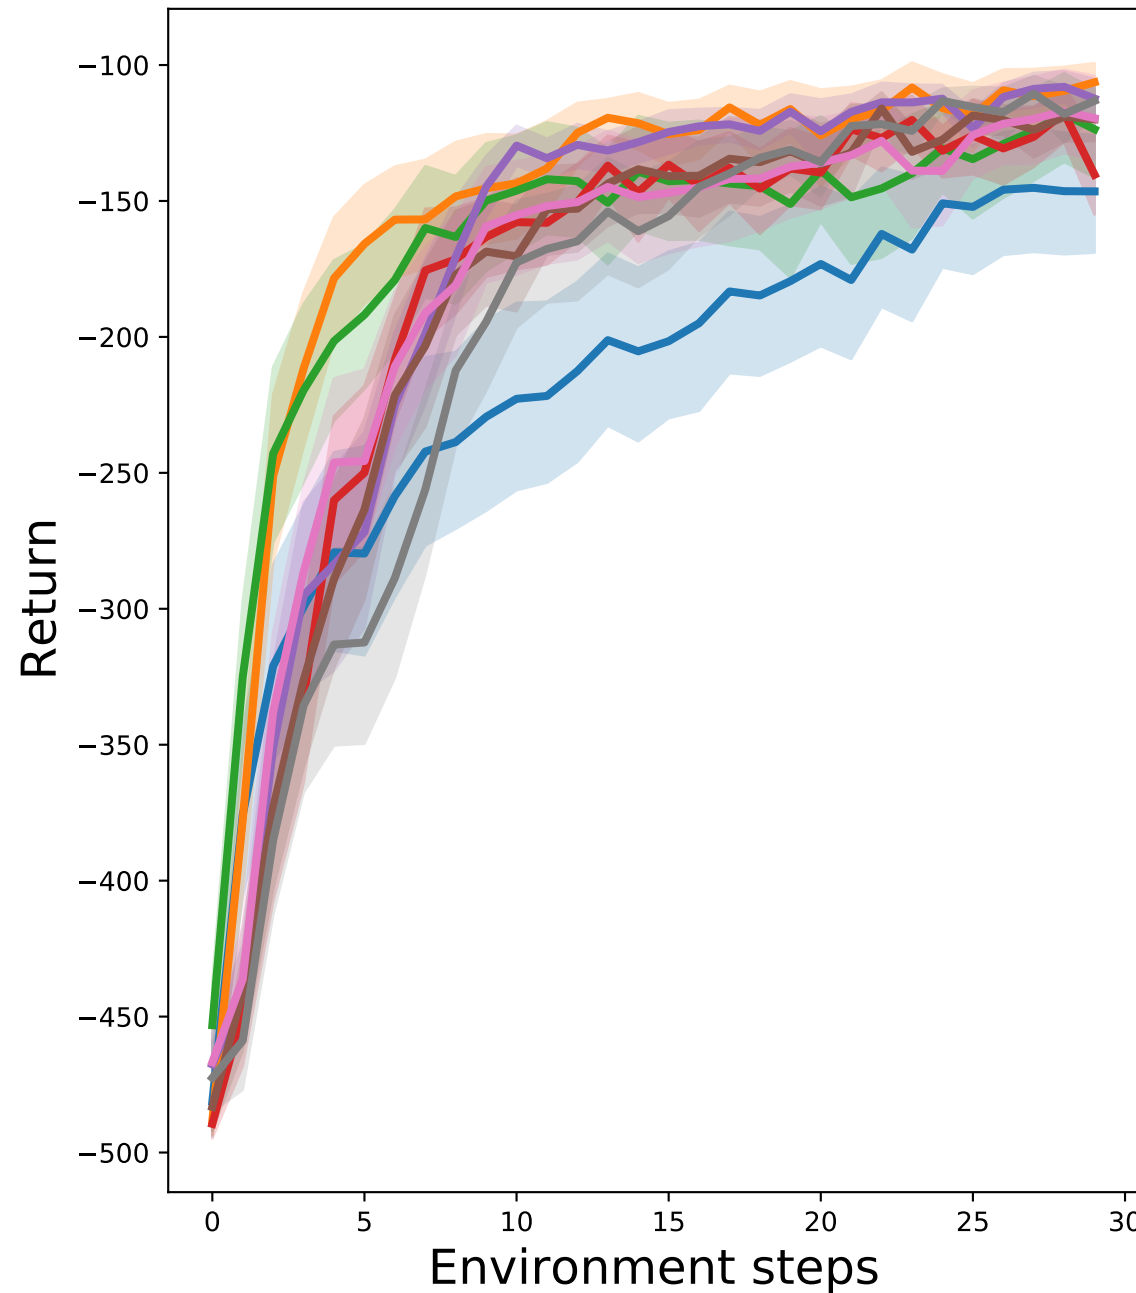

CartPole

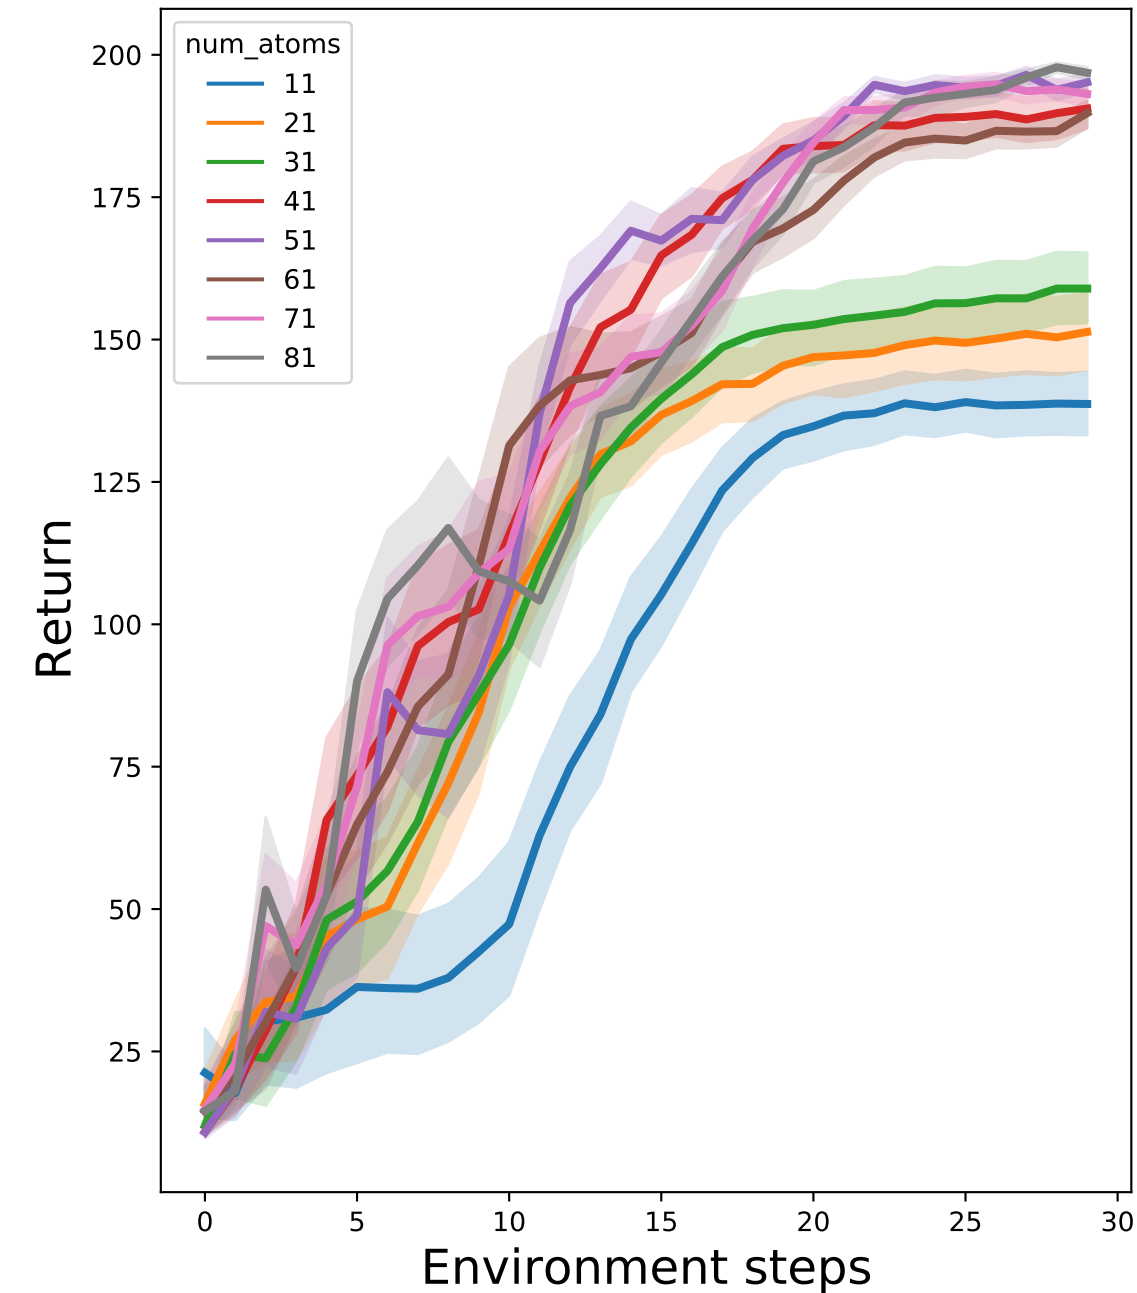

LunarLander

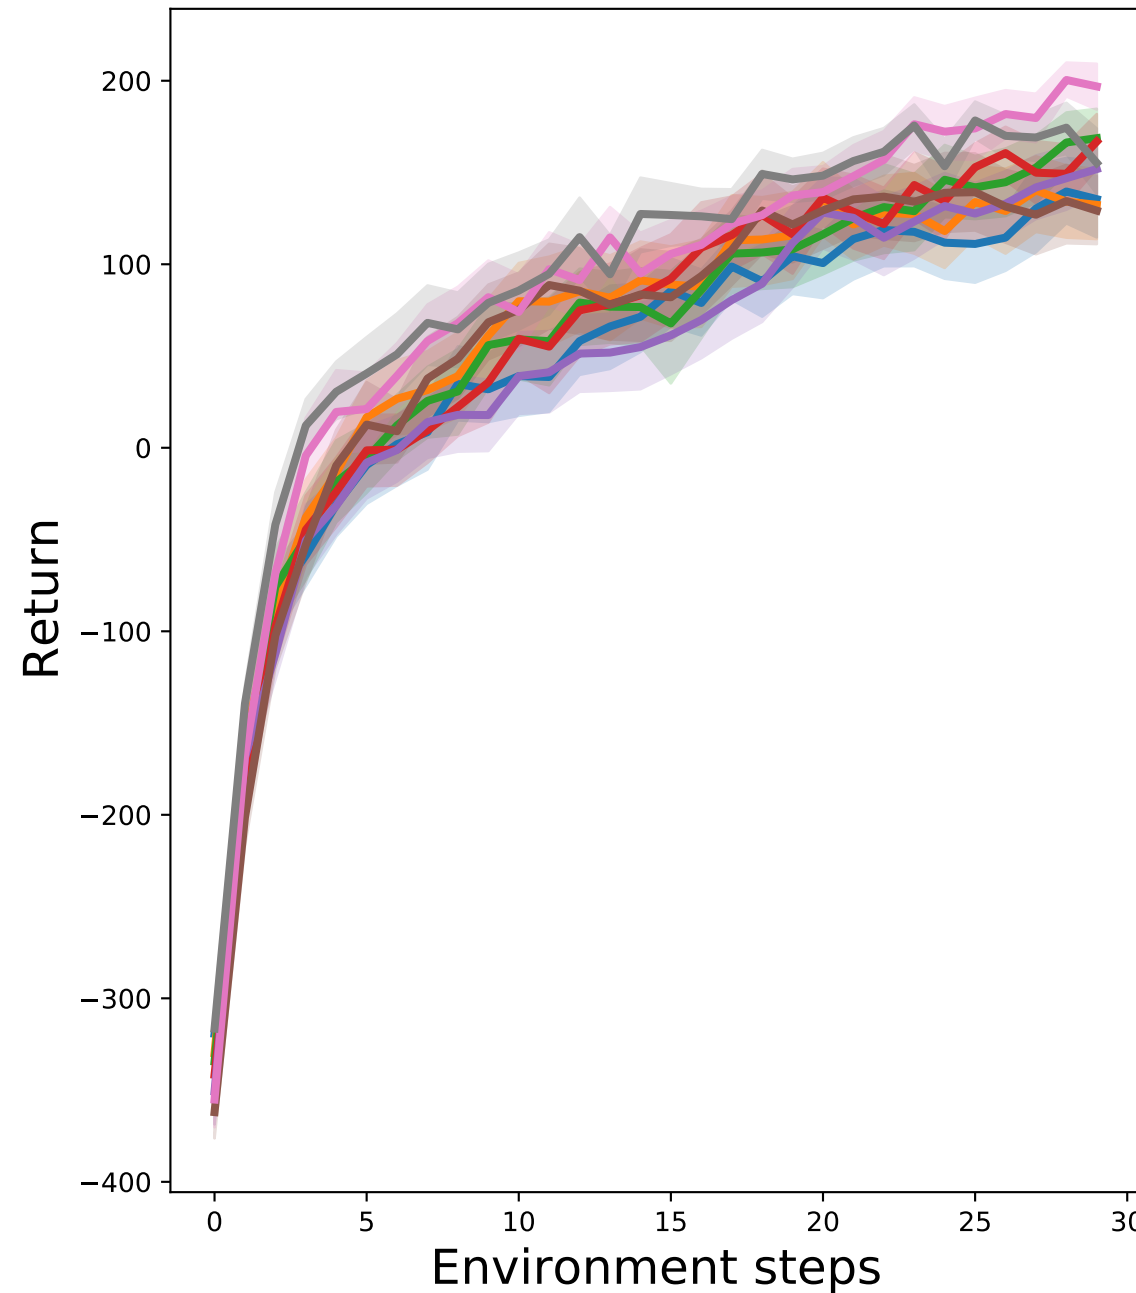

MountainCar

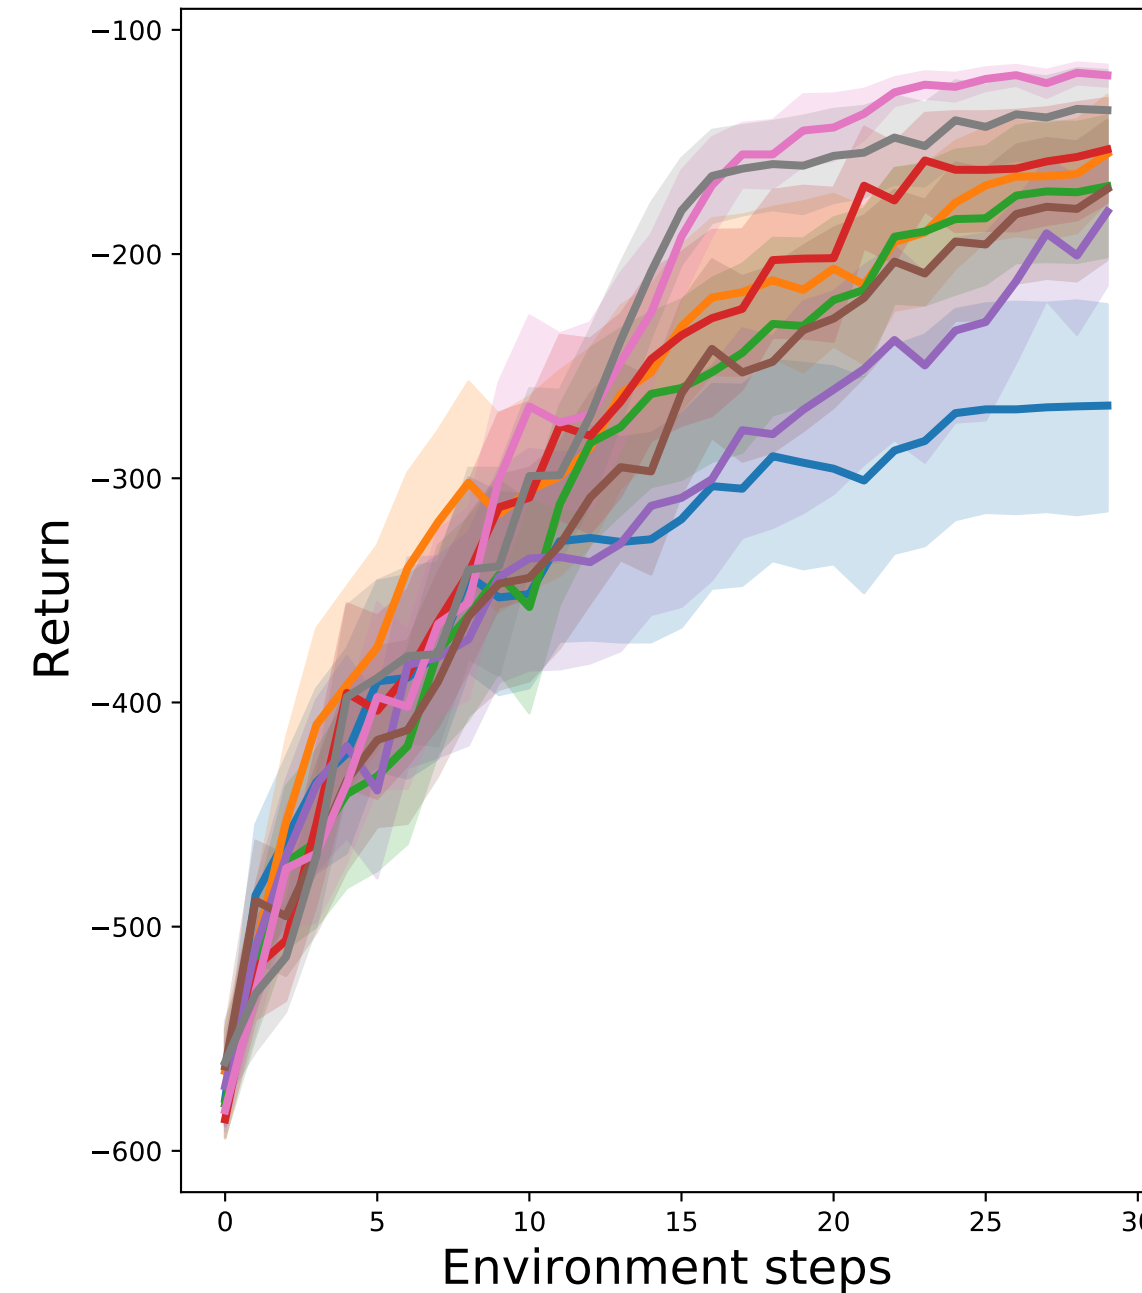

Supplement: supplementary_material [file attachment]

Acrobot (online)

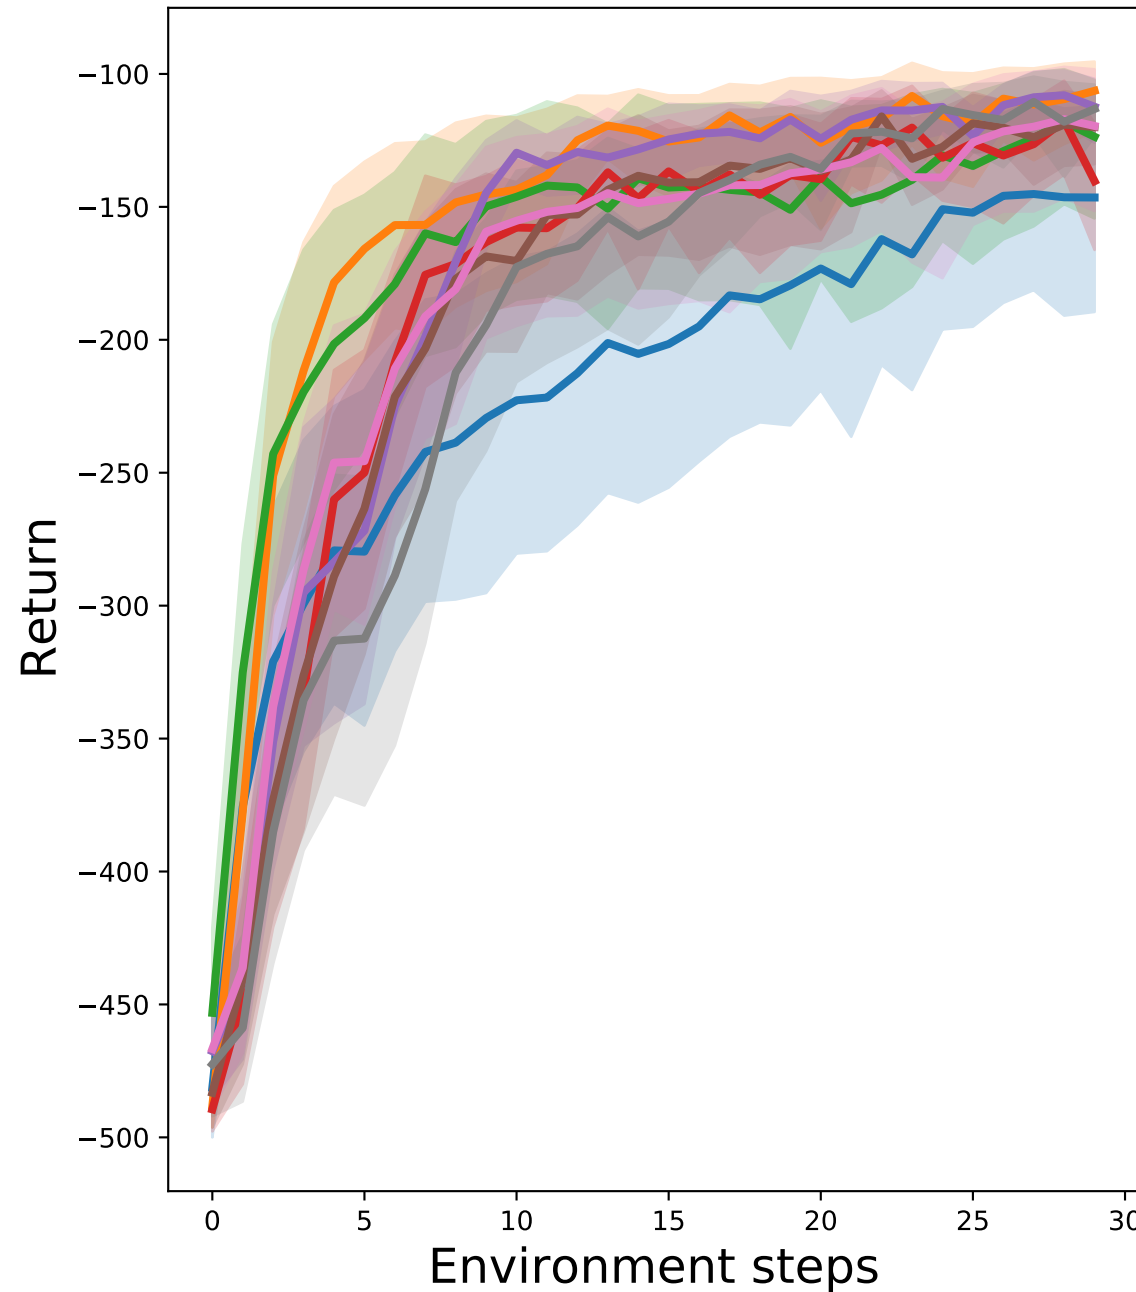

CartPole (online)

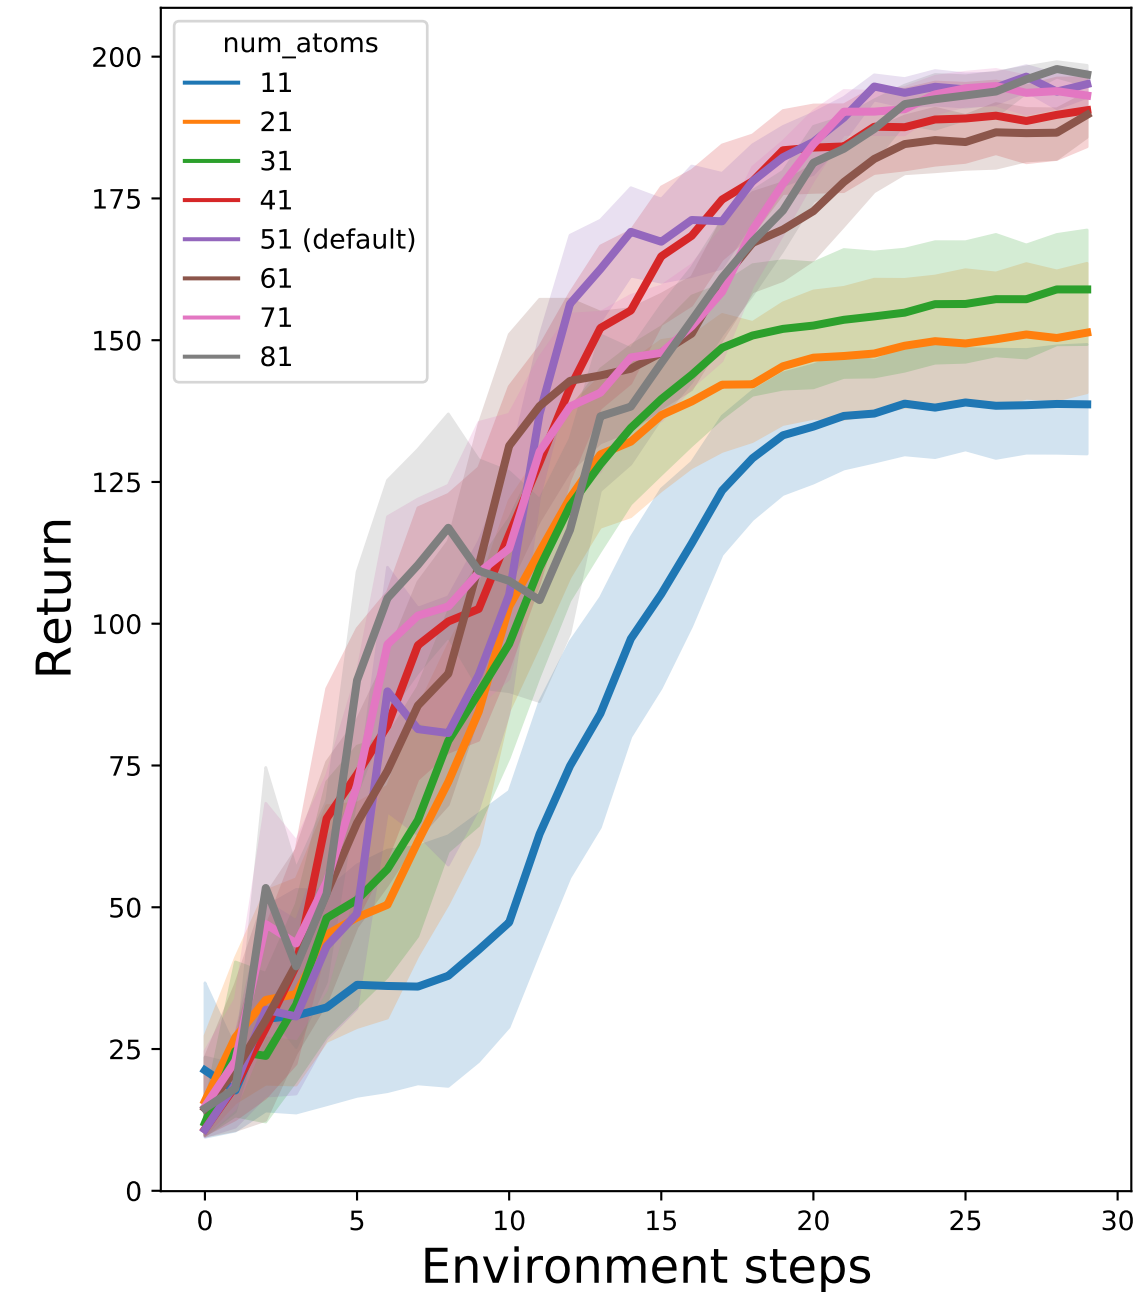

LunarLander (online)

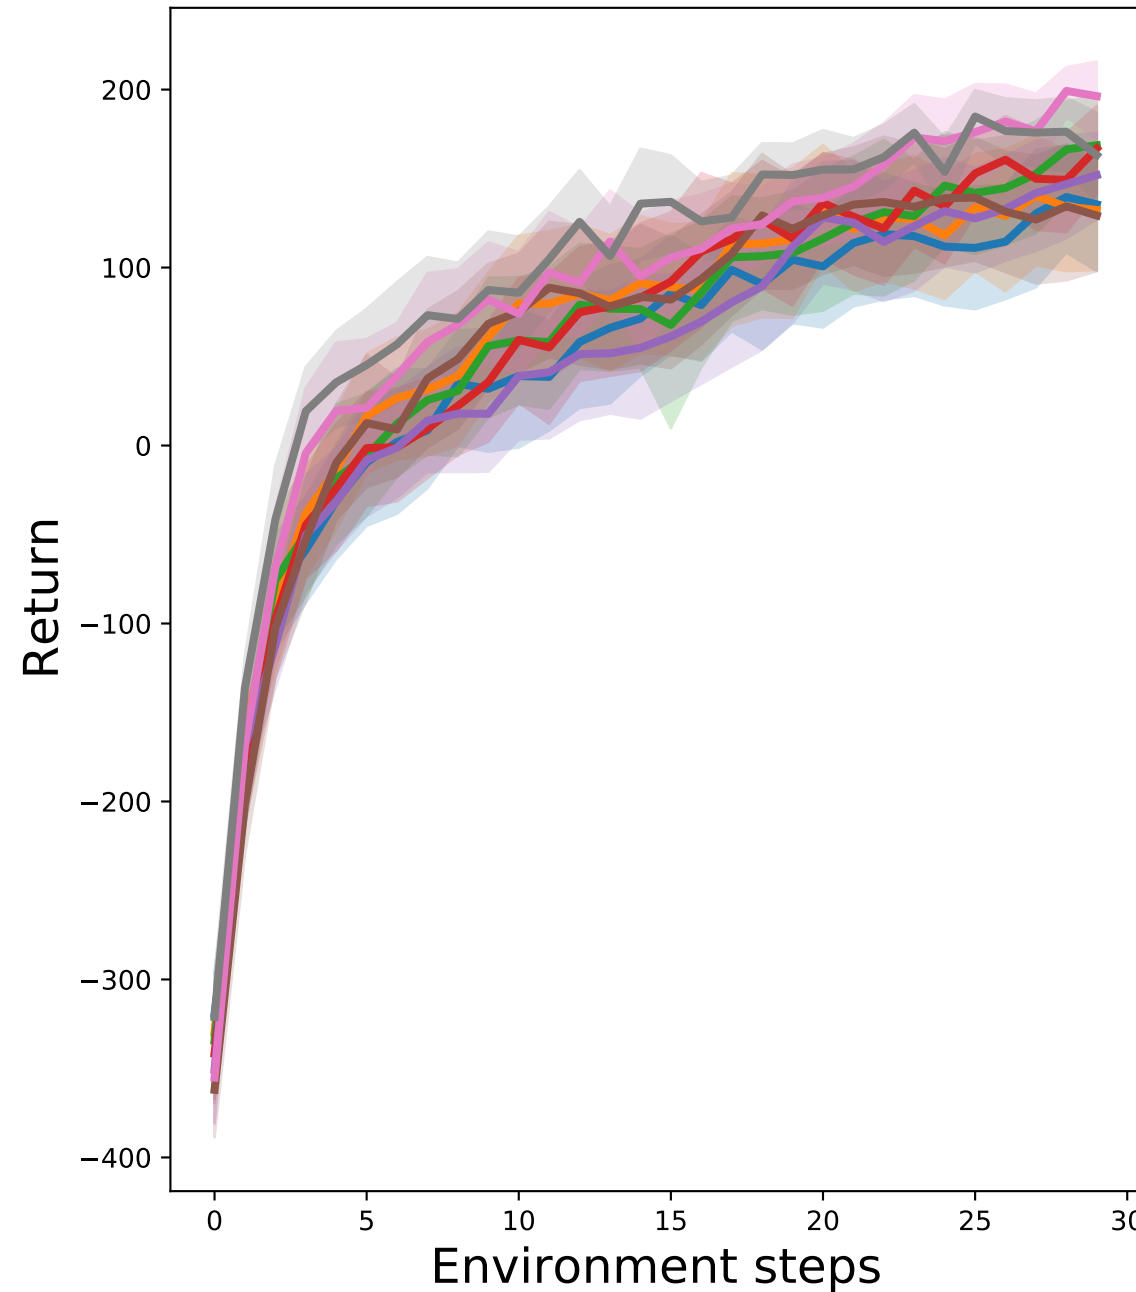

MountainCar (online)

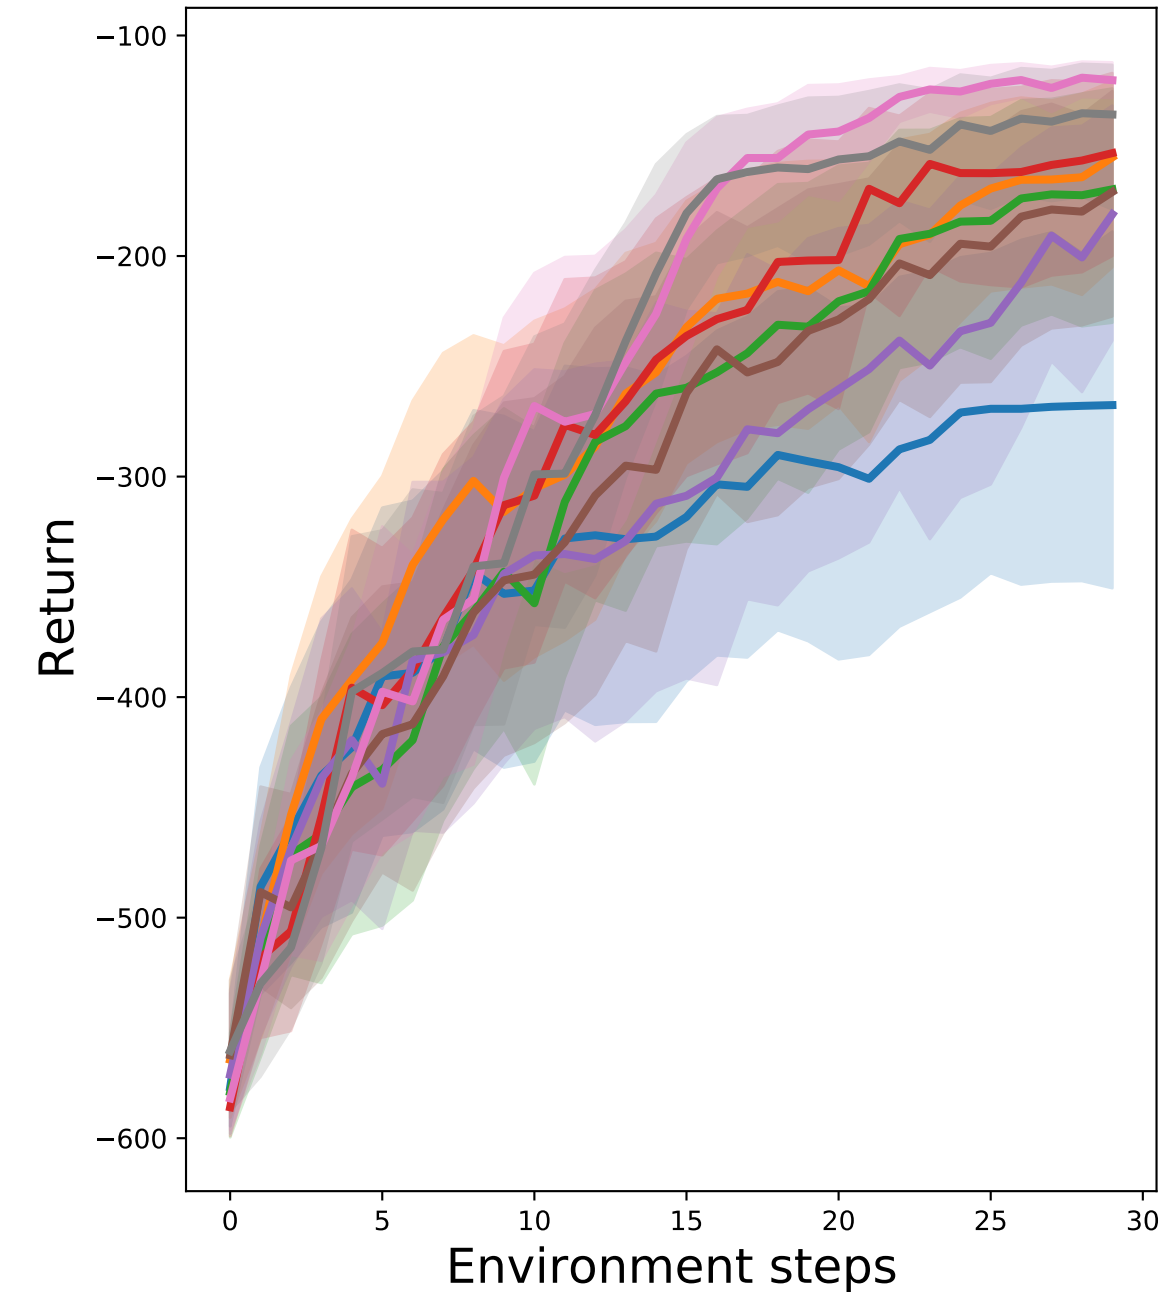

Supplement: supplementary_material [file attachment]

Acrobot

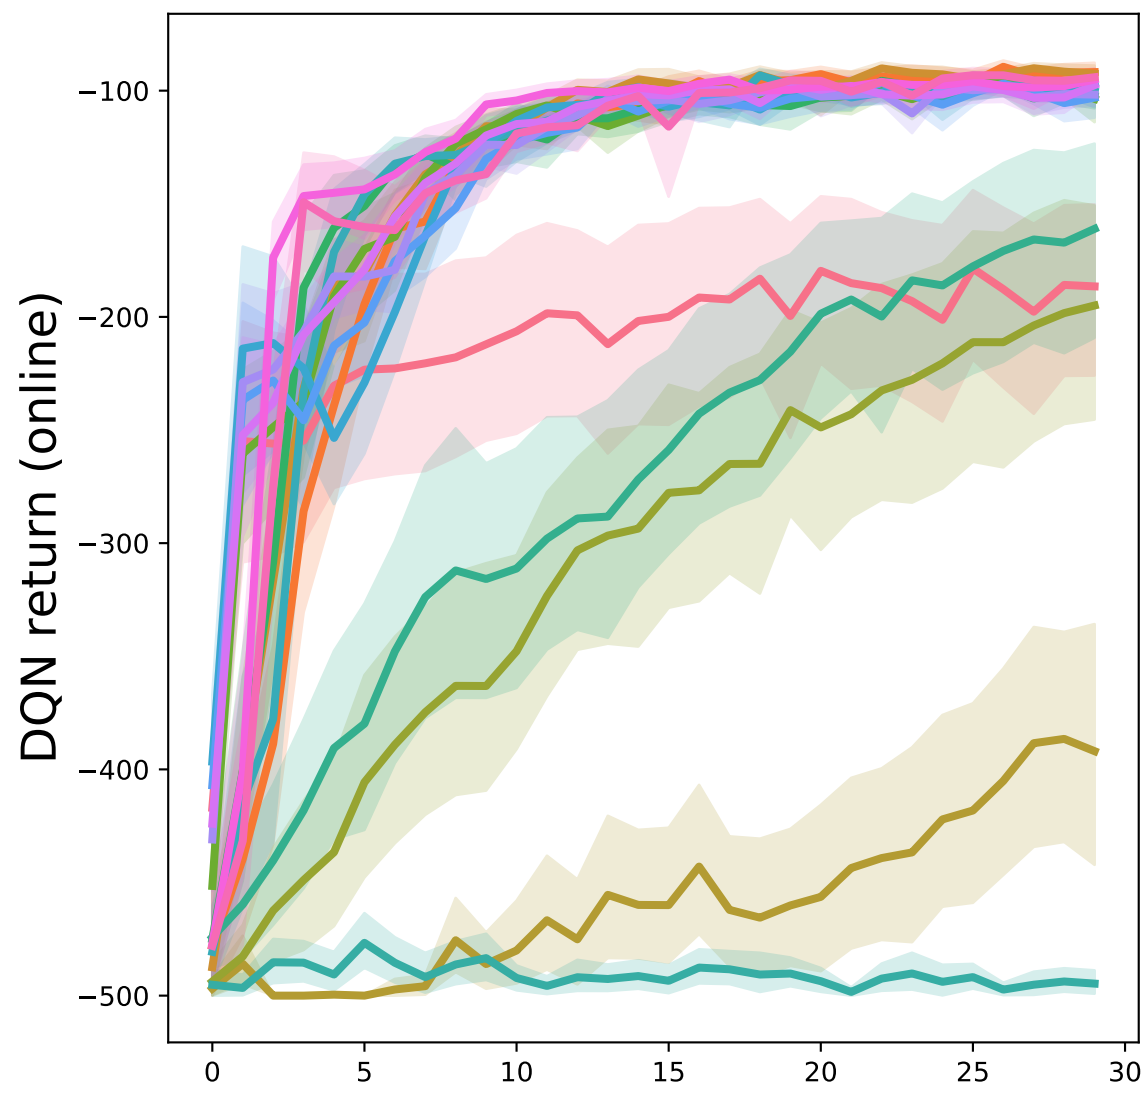

CartPole

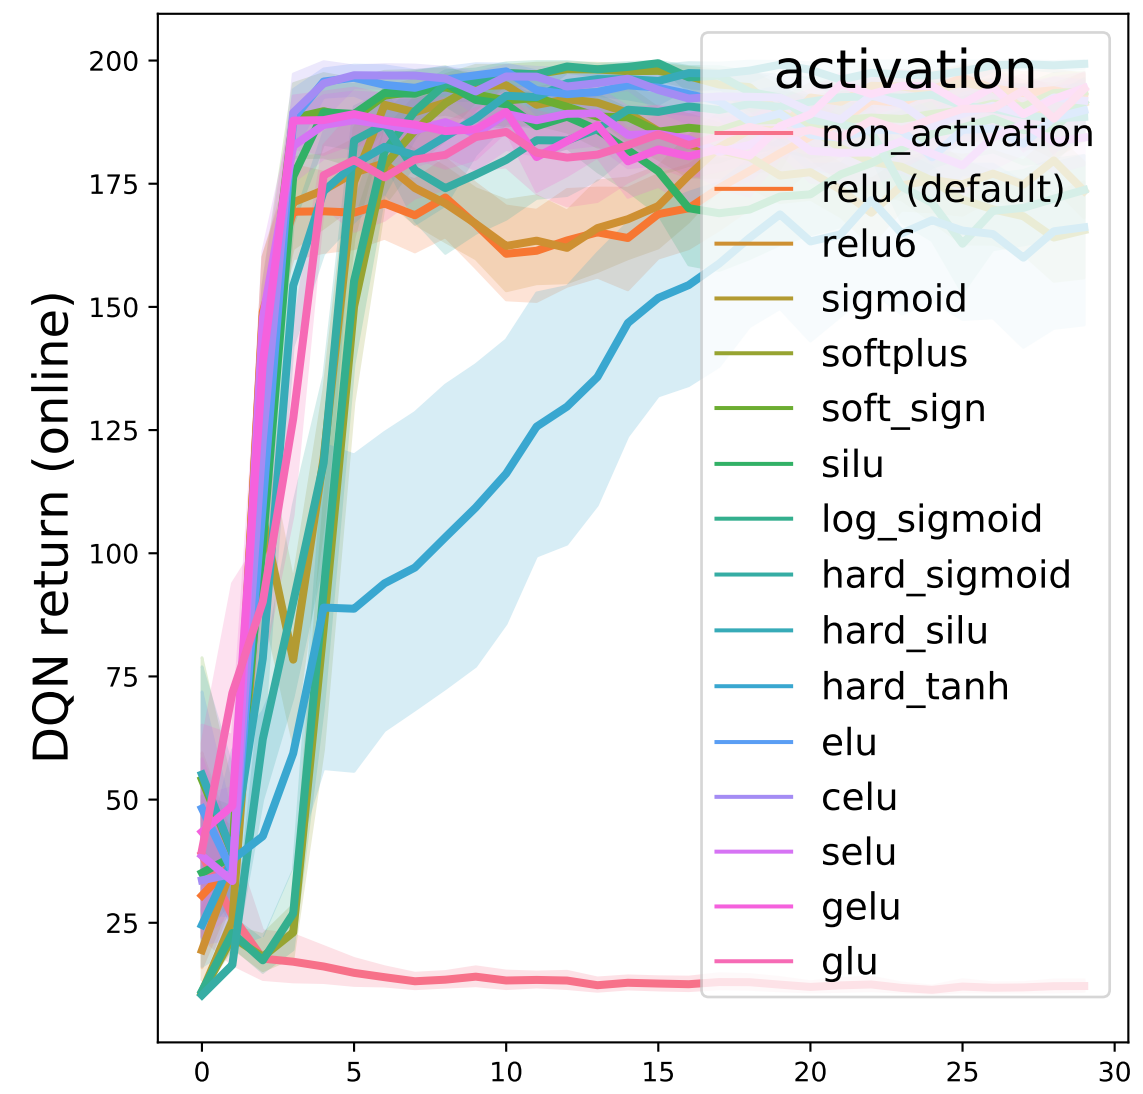

LunarLander

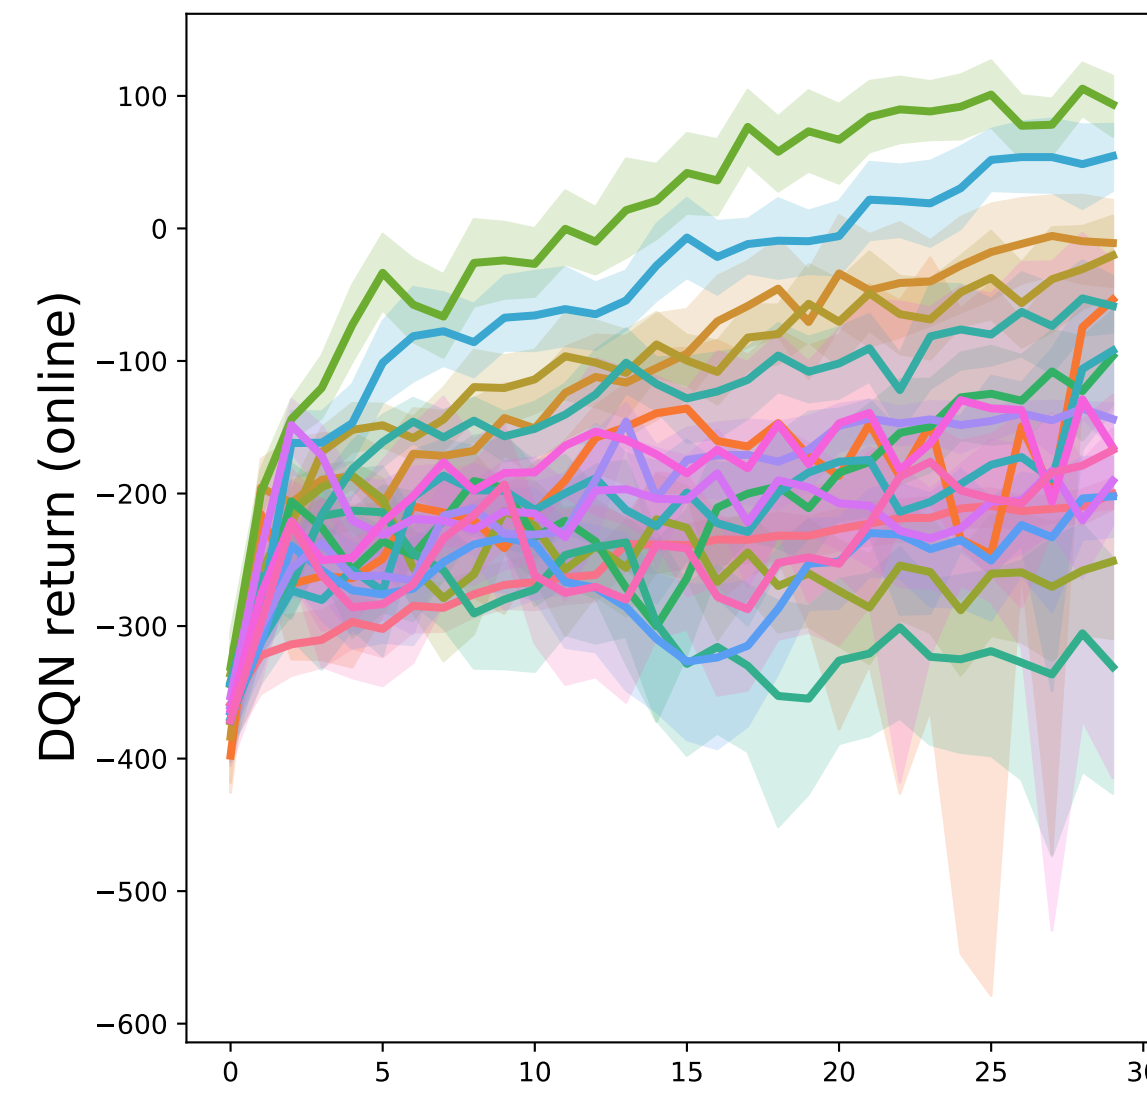

MountainCar

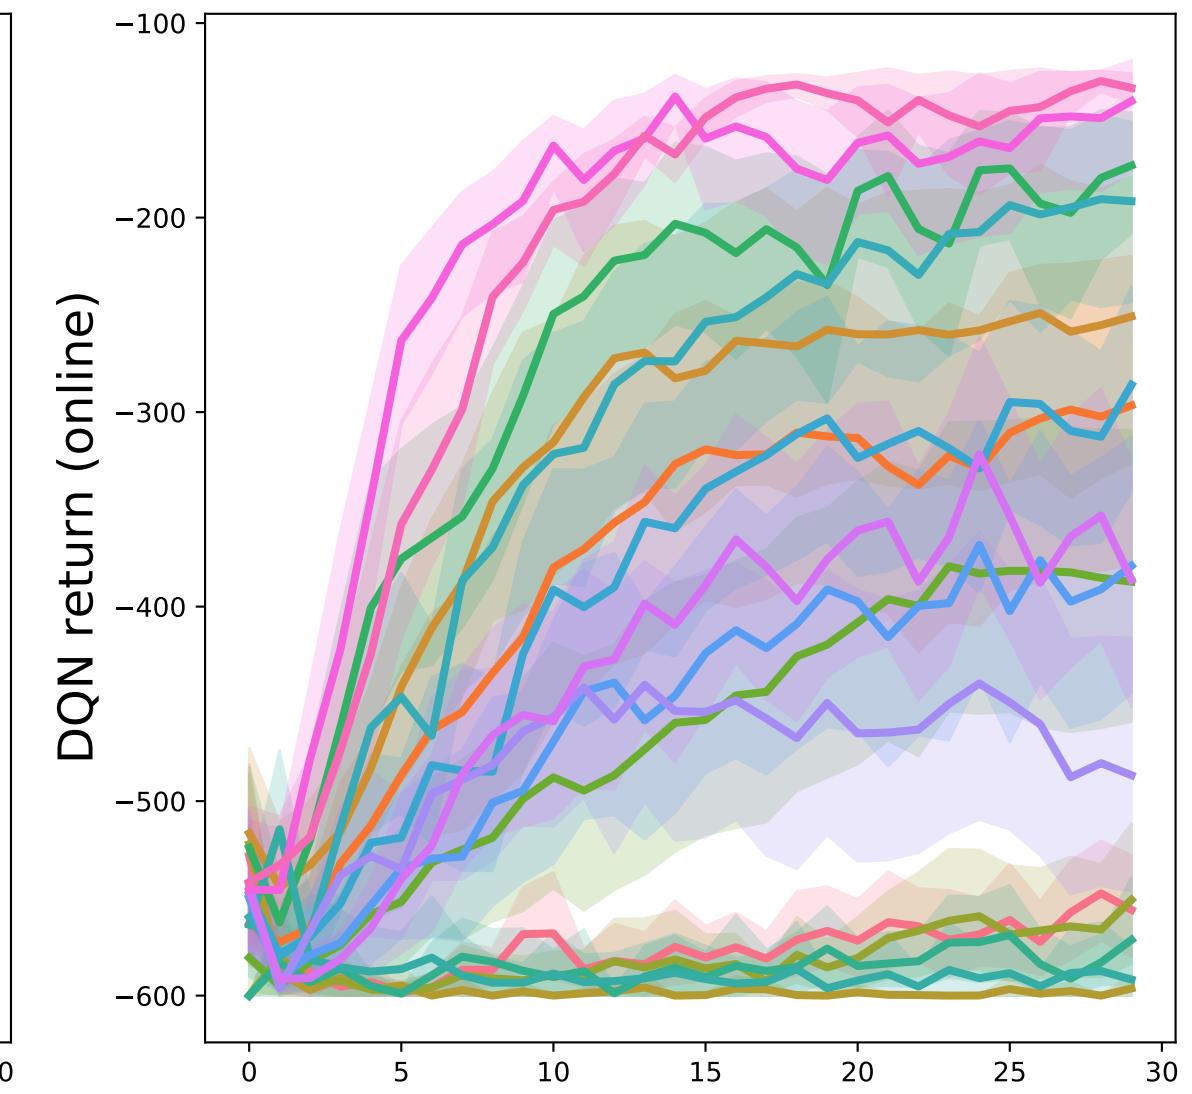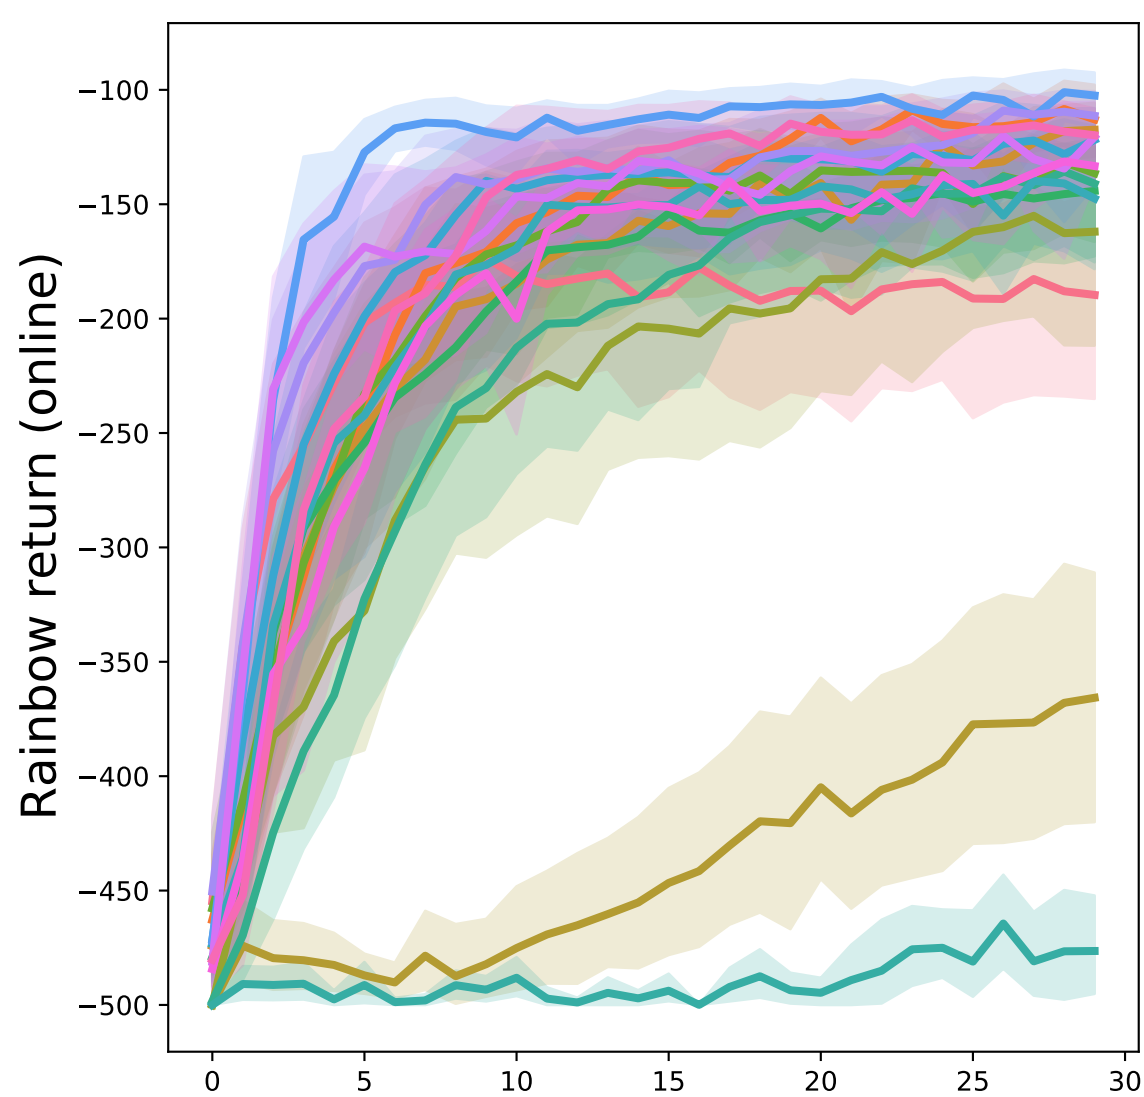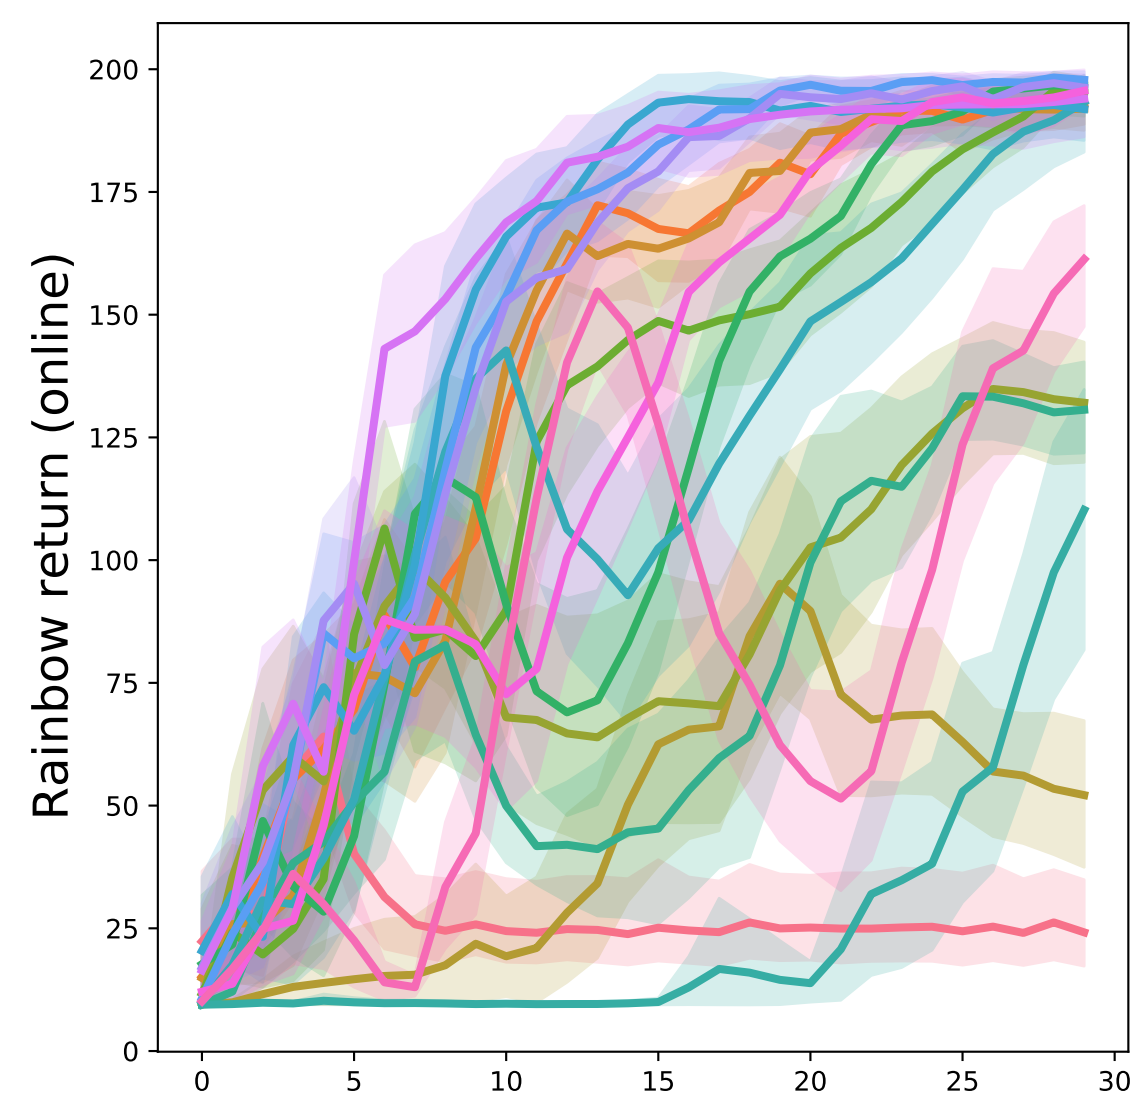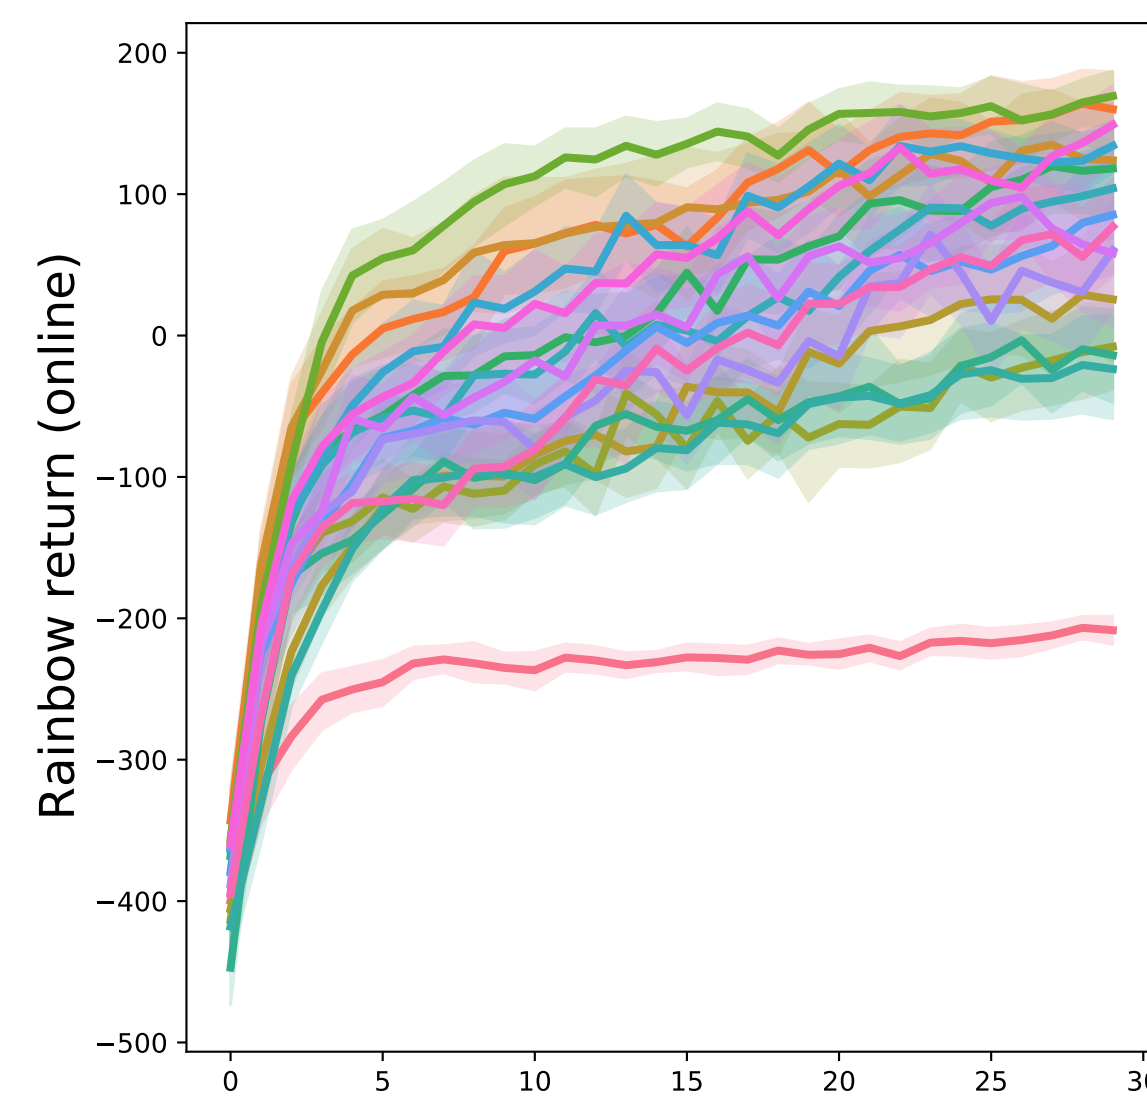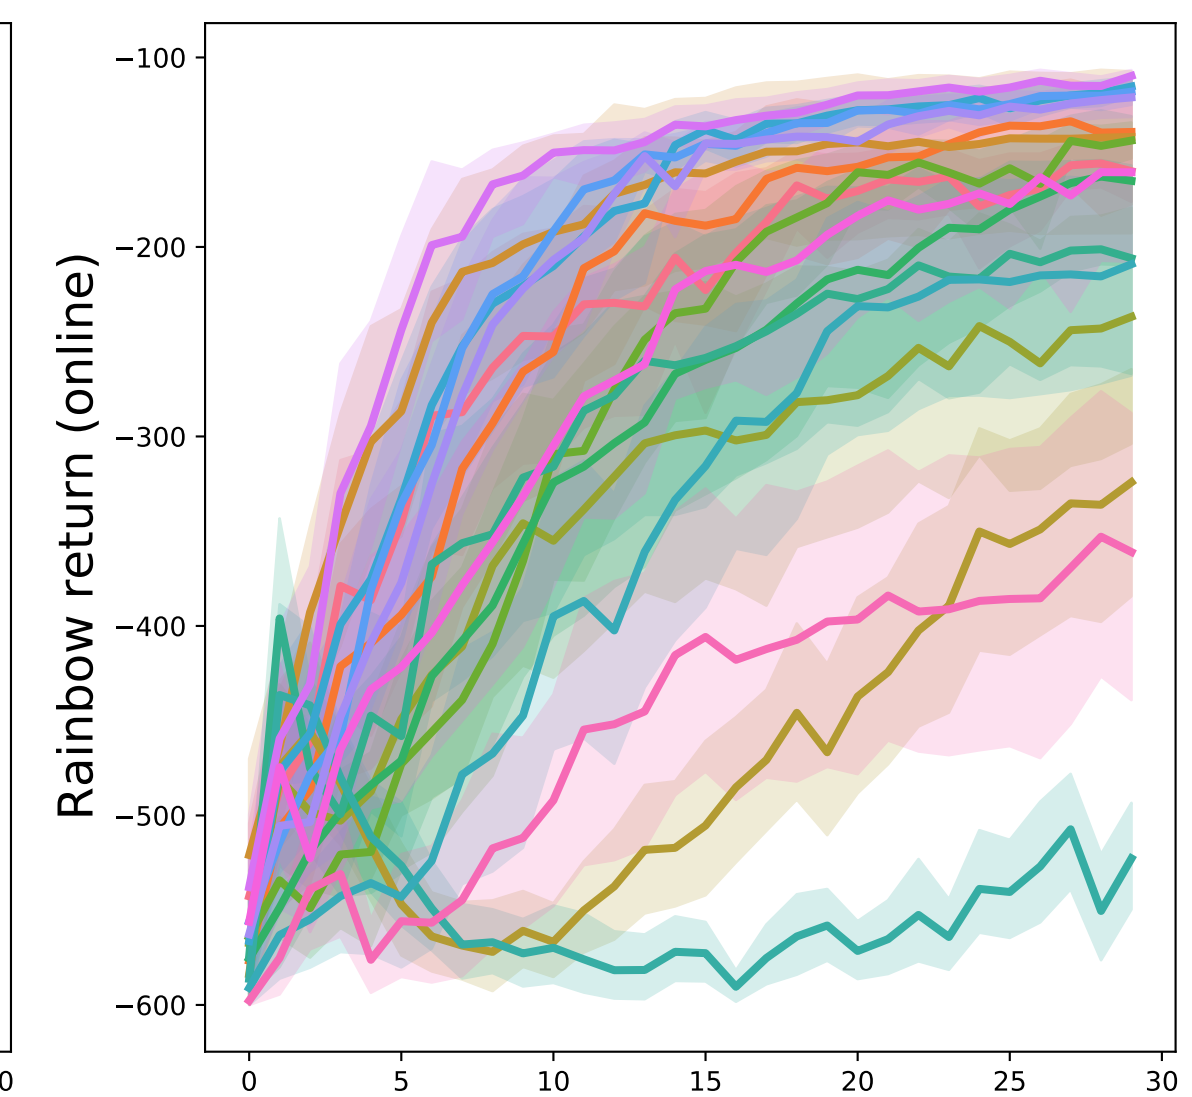

Supplement: supplementary_material [file attachment]
